# Supplementary material for: Linking maternal and somatic 5S rRNA types with different sequence-specific non-LTR retrotransposons
Source: PubMed Central journal article supplement — RNA. 2017 Apr;23(4):446–56. doi: 10.1261/rna.059642.116 (PMC5340908; doi:10.1261/rna.059642.116), 2017-04

Supplemental Figure S8

|            |            |            |            |            |            |            |            |
|------------|------------|------------|------------|------------|------------|------------|------------|
| 32,425,000 | 32,426,000 | 32,427,000 | 32,428,000 | 32,429,000 | 32,430,000 | 32,431,000 | 32,432,000 |
| 32,433,000 | 32,434,000 | 32,435,000 | 32,436,000 | 32,437,000 | 32,438,000 | 32,439,000 | 32,440,000 |
| 32,441,000 | 32,442,000 | 32,443,000 | 32,444,000 | 32,445,000 | 32,446,000 | 32,447,000 | 32,448,000 |
| 32,449,000 | 32,450,000 | 32,451,000 | 32,452,000 | 32,453,000 | 32,454,000 | 32,455,000 | 32,456,000 |
| 32,457,000 | 32,458,000 | 32,459,000 | 32,460,000 | 32,461,000 | 32,462,000 | 32,463,000 | 32,464,000 |
| 32,465,000 | 32,466,000 | 32,467,000 | 32,468,000 | 32,469,000 | 32,470,000 | 32,471,000 | 32,472,000 |
| 32,473,000 | 32,474,000 | 32,475,000 | 32,476,000 | 32,477,000 | 32,478,000 | 32,479,000 | 32,480,000 |
| 32,481,000 | 32,482,000 | 32,483,000 | 32,484,000 | 32,485,000 | 32,486,000 | 32,487,000 | 32,488,000 |
| 32,489,000 | 32,490,000 | 32,491,000 | 32,492,000 | 32,493,000 | 32,494,000 | 32,495,000 | 32,496,000 |
| 32,497,000 | 32,498,000 | 32,499,000 | 32,500,000 | 32,501,000 | 32,502,000 | 32,503,000 | 32,504,000 |
| 32,505,000 | 32,506,000 | 32,507,000 | 32,508,000 | 32,509,000 | 32,510,000 | 32,511,000 | 32,512,000 |
| 32,513,000 | 32,514,000 | 32,515,000 | 32,516,000 | 32,517,000 | 32,518,000 | 32,519,000 | 32,520,000 |
| 32,521,000 | 32,522,000 | 32,523,000 | 32,524,000 | 32,525,000 | 32,526,000 | 32,527,000 | 32,528,000 |
| 32,529,000 | 32,530,000 | 32,531,000 | 32,532,000 | 32,533,000 | 32,534,000 | 32,535,000 | 32,536,000 |
| 32,537,000 | 32,538,000 | 32,539,000 | 32,540,000 | 32,541,000 | 32,542,000 | 32,543,000 | 32,544,000 |
| 32,545,000 | 32,546,000 | 32,547,000 | 32,548,000 | 32,549,000 | 32,550,000 | 32,551,000 | 32,552,000 |
| 32,553,000 | 32,554,000 | 32,555,000 | 32,556,000 | 32,557,000 | 32,558,000 | 32,559,000 | 32,560,000 |
| 32,561,000 | 32,562,000 | 32,563,000 | 32,564,000 | 32,565,000 | 32,566,000 | 32,567,000 | 32,568,000 |
| 32,569,000 | 32,570,000 | 32,571,000 | 32,572,000 | 32,573,000 | 32,574,000 | 32,575,000 | 32,576,000 |
| 32,577,000 | 32,578,000 | 32,579,000 | 32,580,000 | 32,581,000 | 32,582,000 | 32,583,000 | 32,584,000 |
| 32,585,000 | 32,586,000 | 32,587,000 | 32,588,000 | 32,589,000 | 32,590,000 | 32,591,000 | 32,592,000 |
| 32,593,000 | 32,594,000 | 32,595,000 | 32,596,000 | 32,597,000 | 32,598,000 | 32,599,000 | 32,600,000 |

NE

MutsuDr4

Supplemental Figure S8

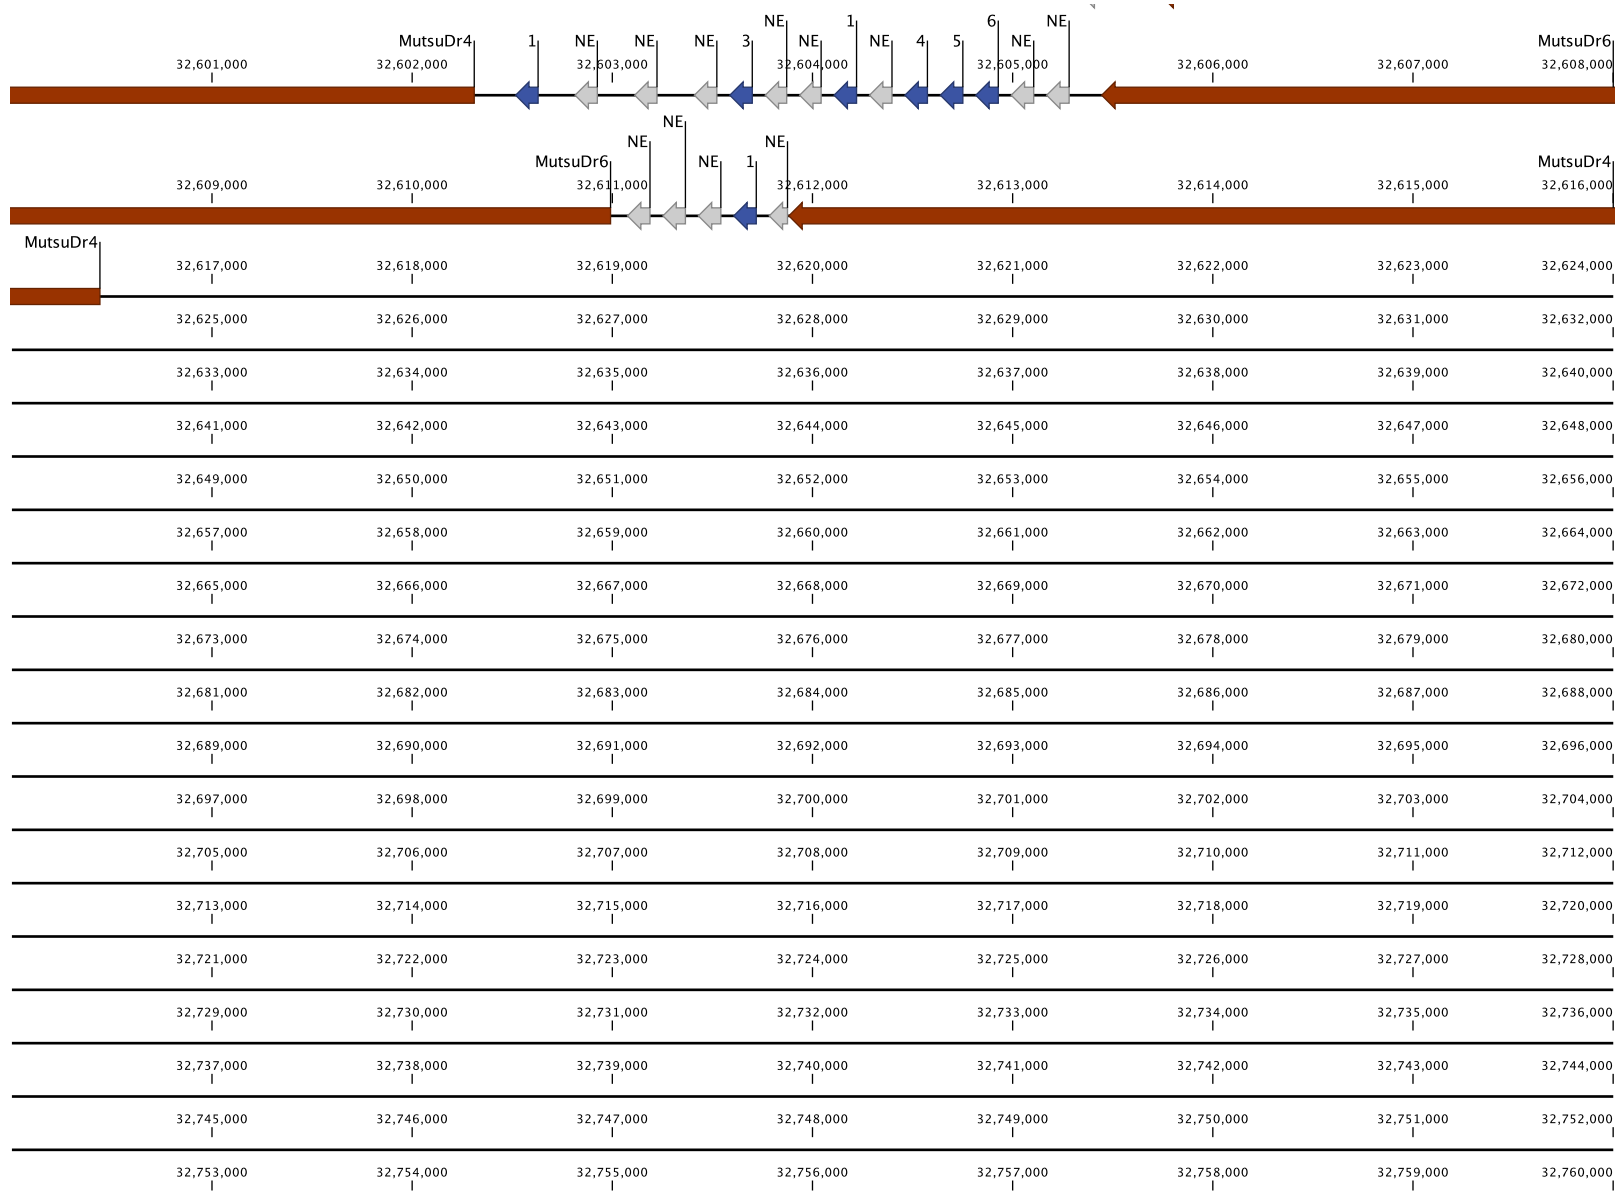

Supplemental Figure S8

|            |            |            |            |            |            |            |            |
|------------|------------|------------|------------|------------|------------|------------|------------|
| 32,761,000 | 32,762,000 | 32,763,000 | 32,764,000 | 32,765,000 | 32,766,000 | 32,767,000 | 32,768,000 |
| 32,769,000 | 32,770,000 | 32,771,000 | 32,772,000 | 32,773,000 | 32,774,000 | 32,775,000 | 32,776,000 |
| 32,777,000 | 32,778,000 | 32,779,000 | 32,780,000 | 32,781,000 | 32,782,000 | 32,783,000 | 32,784,000 |
| 32,785,000 | 32,786,000 | 32,787,000 | 32,788,000 | 32,789,000 | 32,790,000 | 32,791,000 | 32,792,000 |
| 32,793,000 | 32,794,000 | 32,795,000 | 32,796,000 | 32,797,000 | 32,798,000 | 32,799,000 | 32,800,000 |
| 32,801,000 | 32,802,000 | 32,803,000 | 32,804,000 | 32,805,000 | 32,806,000 | 32,807,000 | 32,808,000 |
| 32,809,000 | 32,810,000 | 32,811,000 | 32,812,000 | 32,813,000 | 32,814,000 | 32,815,000 | 32,816,000 |
| 32,817,000 | 32,818,000 | 32,819,000 | 32,820,000 | 32,821,000 | 32,822,000 | 32,823,000 | 32,824,000 |
| 32,825,000 | 32,826,000 | 32,827,000 | 32,828,000 | 32,829,000 | 32,830,000 | 32,831,000 | 32,832,000 |
| 32,833,000 | 32,834,000 | 32,835,000 | 32,836,000 | 32,837,000 | 32,838,000 | 32,839,000 | 32,840,000 |
| 32,841,000 | 32,842,000 | 32,843,000 | 32,844,000 | 32,845,000 | 32,846,000 | 32,847,000 | 32,848,000 |
| 32,849,000 | 32,850,000 | 32,851,000 | 32,852,000 | 32,853,000 | 32,854,000 | 32,855,000 | 32,856,000 |
| 32,857,000 | 32,858,000 | 32,859,000 | 32,860,000 | 32,861,000 | 32,862,000 | 32,863,000 | 32,864,000 |
| 32,865,000 | 32,866,000 | 32,867,000 | 32,868,000 | 32,869,000 | 32,870,000 | 32,871,000 | 32,872,000 |
| 32,873,000 | 32,874,000 | 32,875,000 | 32,876,000 | 32,877,000 | 32,878,000 | 32,879,000 | 32,880,000 |
| 32,881,000 | 32,882,000 | 32,883,000 | 32,884,000 | 32,885,000 | 32,886,000 | 32,887,000 | 32,888,000 |
| 32,889,000 | 32,890,000 | 32,891,000 | 32,892,000 | 32,893,000 | 32,894,000 | 32,895,000 | 32,896,000 |
| 32,897,000 | 32,898,000 | 32,899,000 | 32,900,000 | 32,901,000 | 32,902,000 | 32,903,000 | 32,904,000 |
| 32,905,000 | 32,906,000 | 32,907,000 | 32,908,000 | 32,909,000 | 32,910,000 | 32,911,000 | 32,912,000 |
| 32,913,000 | 32,914,000 | 32,915,000 | 32,916,000 | 32,917,000 | 32,918,000 | 32,919,000 | 32,920,000 |
| 32,921,000 | 32,922,000 | 32,923,000 | 32,924,000 | 32,925,000 | 32,926,000 | 32,927,000 | 32,928,000 |
| 32,929,000 | 32,930,000 | 32,931,000 | 32,932,000 | 32,933,000 | 32,934,000 | 32,935,000 | 32,936,000 |
| 32,937,000 | 32,938,000 | 32,939,000 | 32,940,000 | 32,941,000 | 32,942,000 | 32,943,000 | 32,944,000 |

NE  


Supplemental Figure S8

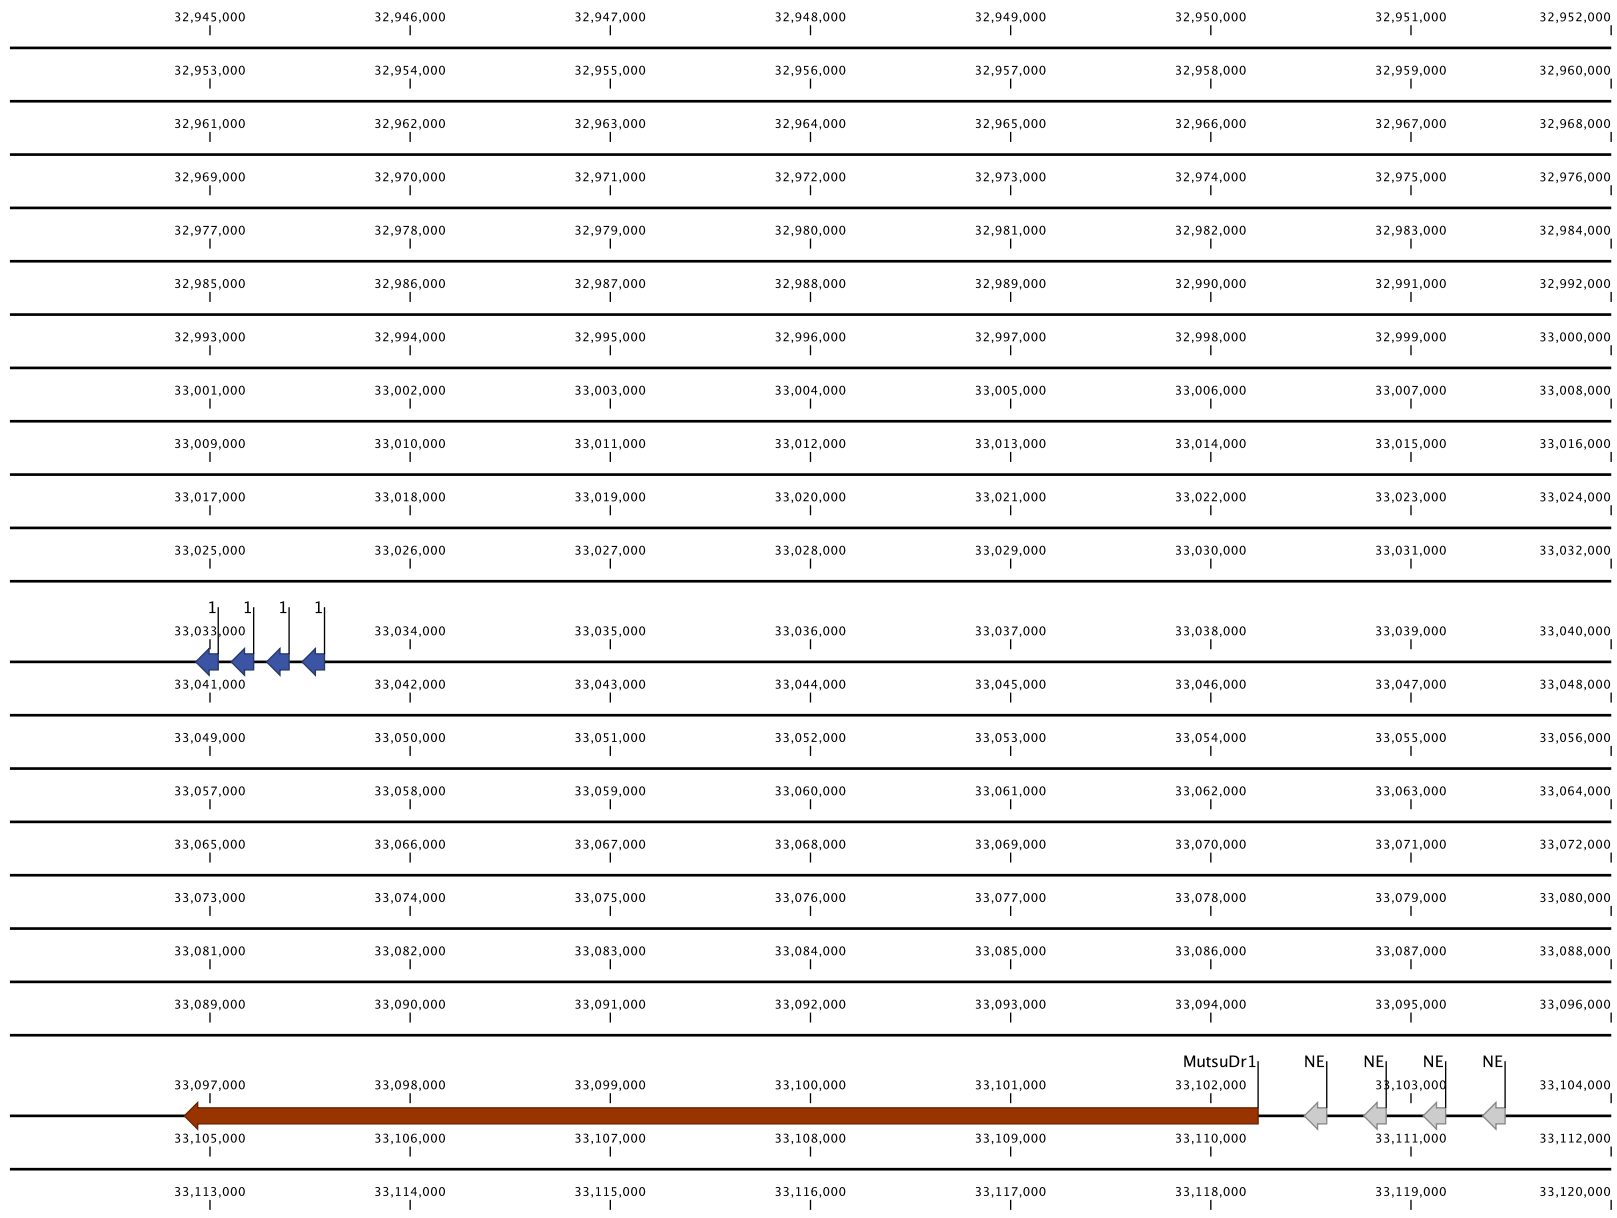

Supplemental Figure S8

|            |            |            |            |            |            |            |            |
|------------|------------|------------|------------|------------|------------|------------|------------|
| 33,121,000 | 33,122,000 | 33,123,000 | 33,124,000 | 33,125,000 | 33,126,000 | 33,127,000 | 33,128,000 |
| 33,129,000 | 33,130,000 | 33,131,000 | 33,132,000 | 33,133,000 | 33,134,000 | 33,135,000 | 33,136,000 |
| 33,137,000 | 33,138,000 | 33,139,000 | 33,140,000 | 33,141,000 | 33,142,000 | 33,143,000 | 33,144,000 |
| 33,145,000 | 33,146,000 | 33,147,000 | 33,148,000 | 33,149,000 | 33,150,000 | 33,151,000 | 33,152,000 |
| 33,153,000 | 33,154,000 | 33,155,000 | 33,156,000 | 33,157,000 | 33,158,000 | 33,159,000 | 33,160,000 |
| 33,161,000 | 33,162,000 | 33,163,000 | 33,164,000 | 33,165,000 | 33,166,000 | 33,167,000 | 33,168,000 |
| 33,169,000 | 33,170,000 | 33,171,000 | 33,172,000 | 33,173,000 | 33,174,000 | 33,175,000 | 33,176,000 |
| 33,177,000 | 33,178,000 | 33,179,000 | 33,180,000 | 33,181,000 | 33,182,000 | 33,183,000 | 33,184,000 |
| 33,185,000 | 33,186,000 | 33,187,000 | 33,188,000 | 33,189,000 | 33,190,000 | 33,191,000 | 33,192,000 |
| 33,193,000 | 33,194,000 | 33,195,000 | 33,196,000 | 33,197,000 | 33,198,000 | 33,199,000 | 33,200,000 |
| 33,201,000 | 33,202,000 | 33,203,000 | 33,204,000 | 33,205,000 | 33,206,000 | 33,207,000 | 33,208,000 |
| 33,209,000 | 33,210,000 | 33,211,000 | 33,212,000 | 33,213,000 | 33,214,000 | 33,215,000 | 33,216,000 |
| 33,217,000 | 33,218,000 | 33,219,000 | 33,220,000 | 33,221,000 | 33,222,000 | 33,223,000 | 33,224,000 |
| 33,225,000 | 33,226,000 | 33,227,000 | 33,228,000 | 33,229,000 | 33,230,000 | 33,231,000 | 33,232,000 |
| 33,233,000 | 33,234,000 | 33,235,000 | 33,236,000 | 33,237,000 | 33,238,000 | 33,239,000 | 33,240,000 |
| 33,241,000 | 33,242,000 | 33,243,000 | 33,244,000 | 33,245,000 | 33,246,000 | 33,247,000 | 33,248,000 |
| 33,249,000 | 33,250,000 | 33,251,000 | 33,252,000 | 33,253,000 | 33,254,000 | 33,255,000 | 33,256,000 |
| 33,257,000 | 33,258,000 | 33,259,000 | 33,260,000 | 33,261,000 | 33,262,000 | 33,263,000 | 33,264,000 |
| 33,265,000 | 33,266,000 | 33,267,000 | 33,268,000 | 33,269,000 | 33,270,000 | 33,271,000 | 33,272,000 |
| 33,273,000 | 33,274,000 | 33,275,000 | 33,276,000 | 33,277,000 | 33,278,000 | 33,279,000 | 33,280,000 |
| 33,281,000 | 33,282,000 | 33,283,000 | 33,284,000 | 33,285,000 | 33,286,000 | 33,287,000 | 33,288,000 |
| 33,289,000 | 33,290,000 | 33,291,000 | 33,292,000 | 33,293,000 | 33,294,000 | 33,295,000 | 33,296,000 |
| 33,297,000 | 33,298,000 | 33,299,000 | 33,300,000 | 33,301,000 | 33,302,000 | 33,303,000 | 33,304,000 |

Supplemental Figure S8

|            |            |            |            |            |            |            |            |
|------------|------------|------------|------------|------------|------------|------------|------------|
| 33,305,000 | 33,306,000 | 33,307,000 | 33,308,000 | 33,309,000 | 33,310,000 | 33,311,000 | 33,312,000 |
| 33,313,000 | 33,314,000 | 33,315,000 | 33,316,000 | 33,317,000 | 33,318,000 | 33,319,000 | 33,320,000 |
| 33,321,000 | 33,322,000 | 33,323,000 | 33,324,000 | 33,325,000 | 33,326,000 | 33,327,000 | 33,328,000 |
| 33,329,000 | 33,330,000 | 33,331,000 | 33,332,000 | 33,333,000 | 33,334,000 | 33,335,000 | 33,336,000 |
| 33,337,000 | 33,338,000 | 33,339,000 | 33,340,000 | 33,341,000 | 33,342,000 | 33,343,000 | 33,344,000 |
| 33,345,000 | 33,346,000 | 33,347,000 | 33,348,000 | 33,349,000 | 33,350,000 | 33,351,000 | 33,352,000 |
| 33,353,000 | 33,354,000 | 33,355,000 | 33,356,000 | 33,357,000 | 33,358,000 | 33,359,000 | 33,360,000 |
| 33,361,000 | 33,362,000 | 33,363,000 | 33,364,000 | 33,365,000 | 33,366,000 | 33,367,000 | 33,368,000 |
| 33,369,000 | 33,370,000 | 33,371,000 | 33,372,000 | 33,373,000 | 33,374,000 | 33,375,000 | 33,376,000 |
| 33,377,000 | 33,378,000 | 33,379,000 | 33,380,000 | 33,381,000 | 33,382,000 | 33,383,000 | 33,384,000 |
| 33,385,000 | 33,386,000 | 33,387,000 | 33,388,000 | 33,389,000 | 33,390,000 | 33,391,000 | 33,392,000 |
| 33,393,000 | 33,394,000 | 33,395,000 | 33,396,000 | 33,397,000 | 33,398,000 | 33,399,000 | 33,400,000 |
| 33,401,000 | 33,402,000 | 33,403,000 | 33,404,000 | 33,405,000 | 33,406,000 | 33,407,000 | 33,408,000 |
| 33,409,000 | 33,410,000 | 33,411,000 | 33,412,000 | 33,413,000 | 33,414,000 | 33,415,000 | 33,416,000 |
| 33,417,000 | 33,418,000 | 33,419,000 | 33,420,000 | 33,421,000 | 33,422,000 | 33,423,000 | 33,424,000 |
| 33,425,000 | 33,426,000 | 33,427,000 | 33,428,000 | 33,429,000 | 33,430,000 | 33,431,000 | 33,432,000 |
| 33,433,000 | 33,434,000 | 33,435,000 | 33,436,000 | 33,437,000 | 33,438,000 | 33,439,000 | 33,440,000 |
| 33,441,000 | 33,442,000 | 33,443,000 | 33,444,000 | 33,445,000 | 33,446,000 | 33,447,000 | 33,448,000 |
| 33,449,000 | 33,450,000 | 33,451,000 | 33,452,000 | 33,453,000 | 33,454,000 | 33,455,000 | 33,456,000 |
| 33,457,000 | 33,458,000 | 33,459,000 | 33,460,000 | 33,461,000 | 33,462,000 | 33,463,000 | 33,464,000 |
| 33,465,000 | 33,466,000 | 33,467,000 | 33,468,000 | 33,469,000 | 33,470,000 | 33,471,000 | 33,472,000 |
| 33,473,000 | 33,474,000 | 33,475,000 | 33,476,000 | 33,477,000 | 33,478,000 | 33,479,000 | 33,480,000 |
| 33,481,000 | 33,482,000 | 33,483,000 | 33,484,000 | 33,485,000 | 33,486,000 | 33,487,000 | 33,488,000 |

NE  


Supplemental Figure S8

|            |            |            |            |            |            |            |            |
|------------|------------|------------|------------|------------|------------|------------|------------|
| 33,489,000 | 33,490,000 | 33,491,000 | 33,492,000 | 33,493,000 | 33,494,000 | 33,495,000 | 33,496,000 |
| 33,497,000 | 33,498,000 | 33,499,000 | 33,500,000 | 33,501,000 | 33,502,000 | 33,503,000 | 33,504,000 |
| 33,505,000 | 33,506,000 | 33,507,000 | 33,508,000 | 33,509,000 | 33,510,000 | 33,511,000 | 33,512,000 |
| 33,513,000 | 33,514,000 | 33,515,000 | 33,516,000 | 33,517,000 | 33,518,000 | 33,519,000 | 33,520,000 |
| 33,521,000 | 33,522,000 | 33,523,000 | 33,524,000 | 33,525,000 | 33,526,000 | 33,527,000 | 33,528,000 |
| 33,529,000 | 33,530,000 | 33,531,000 | 33,532,000 | 33,533,000 | 33,534,000 | 33,535,000 | 33,536,000 |
| 33,537,000 | 33,538,000 | 33,539,000 | 33,540,000 | 33,541,000 | 33,542,000 | 33,543,000 | 33,544,000 |
| 33,545,000 | 33,546,000 | 33,547,000 | 33,548,000 | 33,549,000 | 33,550,000 | 33,551,000 | 33,552,000 |
| 33,553,000 | 33,554,000 | 33,555,000 | 33,556,000 | 33,557,000 | 33,558,000 | 33,559,000 | 33,560,000 |
| 33,561,000 | 33,562,000 | 33,563,000 | 33,564,000 | 33,565,000 | 33,566,000 | 33,567,000 | 33,568,000 |
| 33,569,000 | 33,570,000 | 33,571,000 | 33,572,000 | 33,573,000 | 33,574,000 | 33,575,000 | 33,576,000 |
| 33,577,000 | 33,578,000 | 33,579,000 | 33,580,000 | 33,581,000 | 33,582,000 | 33,583,000 | 33,584,000 |
| 33,585,000 | 33,586,000 | 33,587,000 | 33,588,000 | 33,589,000 | 33,590,000 | 33,591,000 | 33,592,000 |
| 33,593,000 | 33,594,000 | 33,595,000 | 33,596,000 | 33,597,000 | 33,598,000 | 33,599,000 | 33,600,000 |
| 33,601,000 | 33,602,000 | 33,603,000 | 33,604,000 | 33,605,000 | 33,606,000 | 33,607,000 | 33,608,000 |
| 33,609,000 | 33,610,000 | 33,611,000 | 33,612,000 | 33,613,000 | 33,614,000 | 33,615,000 | 33,616,000 |
| 33,617,000 | 33,618,000 | 33,619,000 | 33,620,000 | 33,621,000 | 33,622,000 | 33,623,000 | 33,624,000 |
| 33,625,000 | 33,626,000 | 33,627,000 | 33,628,000 | 33,629,000 | 33,630,000 | 33,631,000 | 33,632,000 |
| 33,633,000 | 33,634,000 | 33,635,000 | 33,636,000 | 33,637,000 | 33,638,000 | 33,639,000 | 33,640,000 |
| 33,641,000 | 33,642,000 | 33,643,000 | 33,644,000 | 33,645,000 | 33,646,000 | 33,647,000 | 33,648,000 |
| 33,649,000 | 33,650,000 | 33,651,000 | 33,652,000 | 33,653,000 | 33,654,000 | 33,655,000 | 33,656,000 |
| 33,657,000 | 33,658,000 | 33,659,000 | 33,660,000 | 33,661,000 | 33,662,000 | 33,663,000 | 33,664,000 |
| 33,665,000 | 33,666,000 | 33,667,000 | 33,668,000 | 33,669,000 | 33,670,000 | 33,671,000 | 33,672,000 |

NE

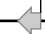

Supplemental Figure S8

|            |            |            |            |            |            |            |            |
|------------|------------|------------|------------|------------|------------|------------|------------|
| 33,673,000 | 33,674,000 | 33,675,000 | 33,676,000 | 33,677,000 | 33,678,000 | 33,679,000 | 33,680,000 |
| 33,681,000 | 33,682,000 | 33,683,000 | 33,684,000 | 33,685,000 | 33,686,000 | 33,687,000 | 33,688,000 |
| 33,689,000 | 33,690,000 | 33,691,000 | 33,692,000 | 33,693,000 | 33,694,000 | 33,695,000 | 33,696,000 |
| 33,697,000 | 33,698,000 | 33,699,000 | 33,700,000 | 33,701,000 | 33,702,000 | 33,703,000 | 33,704,000 |
| 33,705,000 | 33,706,000 | 33,707,000 | 33,708,000 | 33,709,000 | 33,710,000 | 33,711,000 | 33,712,000 |
| 33,713,000 | 33,714,000 | 33,715,000 | 33,716,000 | 33,717,000 | 33,718,000 | 33,719,000 | 33,720,000 |
| 33,721,000 | 33,722,000 | 33,723,000 | 33,724,000 | 33,725,000 | 33,726,000 | 33,727,000 | 33,728,000 |
| 33,729,000 | 33,730,000 | 33,731,000 | 33,732,000 | 33,733,000 | 33,734,000 | 33,735,000 | 33,736,000 |
| 33,737,000 | 33,738,000 | 33,739,000 | 33,740,000 | 33,741,000 | 33,742,000 | 33,743,000 | 33,744,000 |
| 33,745,000 | 33,746,000 | 33,747,000 | 33,748,000 | 33,749,000 | 33,750,000 | 33,751,000 | 33,752,000 |
| 33,753,000 | 33,754,000 | 33,755,000 | 33,756,000 | 33,757,000 | 33,758,000 | 33,759,000 | 33,760,000 |
| 33,761,000 | 33,762,000 | 33,763,000 | 33,764,000 | 33,765,000 | 33,766,000 | 33,767,000 | 33,768,000 |
| 33,769,000 | 33,770,000 | 33,771,000 | 33,772,000 | 33,773,000 | 33,774,000 | 33,775,000 | 33,776,000 |
| 33,777,000 | 33,778,000 | 33,779,000 | 33,780,000 | 33,781,000 | 33,782,000 | 33,783,000 | 33,784,000 |
| 33,785,000 | 33,786,000 | 33,787,000 | 33,788,000 | 33,789,000 | 33,790,000 | 33,791,000 | 33,792,000 |
| 33,793,000 | 33,794,000 | 33,795,000 | 33,796,000 | 33,797,000 | 33,798,000 | 33,799,000 | 33,800,000 |
| 33,801,000 | 33,802,000 | 33,803,000 | 33,804,000 | 33,805,000 | 33,806,000 | 33,807,000 | 33,808,000 |
| 33,809,000 | 33,810,000 | 33,811,000 | 33,812,000 | 33,813,000 | 33,814,000 | 33,815,000 | 33,816,000 |
| 33,817,000 | 33,818,000 | 33,819,000 | 33,820,000 | 33,821,000 | 33,822,000 | 33,823,000 | 33,824,000 |
| 33,825,000 | 33,826,000 | 33,827,000 | 33,828,000 | 33,829,000 | 33,830,000 | 33,831,000 | 33,832,000 |
| 33,833,000 | 33,834,000 | 33,835,000 | 33,836,000 | 33,837,000 | 33,838,000 | 33,839,000 | 33,840,000 |
| 33,841,000 | 33,842,000 | 33,843,000 | 33,844,000 | 33,845,000 | 33,846,000 | 33,847,000 | 33,848,000 |
| 33,849,000 | 33,850,000 | 33,851,000 | 33,852,000 | 33,853,000 | 33,854,000 | 33,855,000 | 33,856,000 |



Supplemental Figure S8

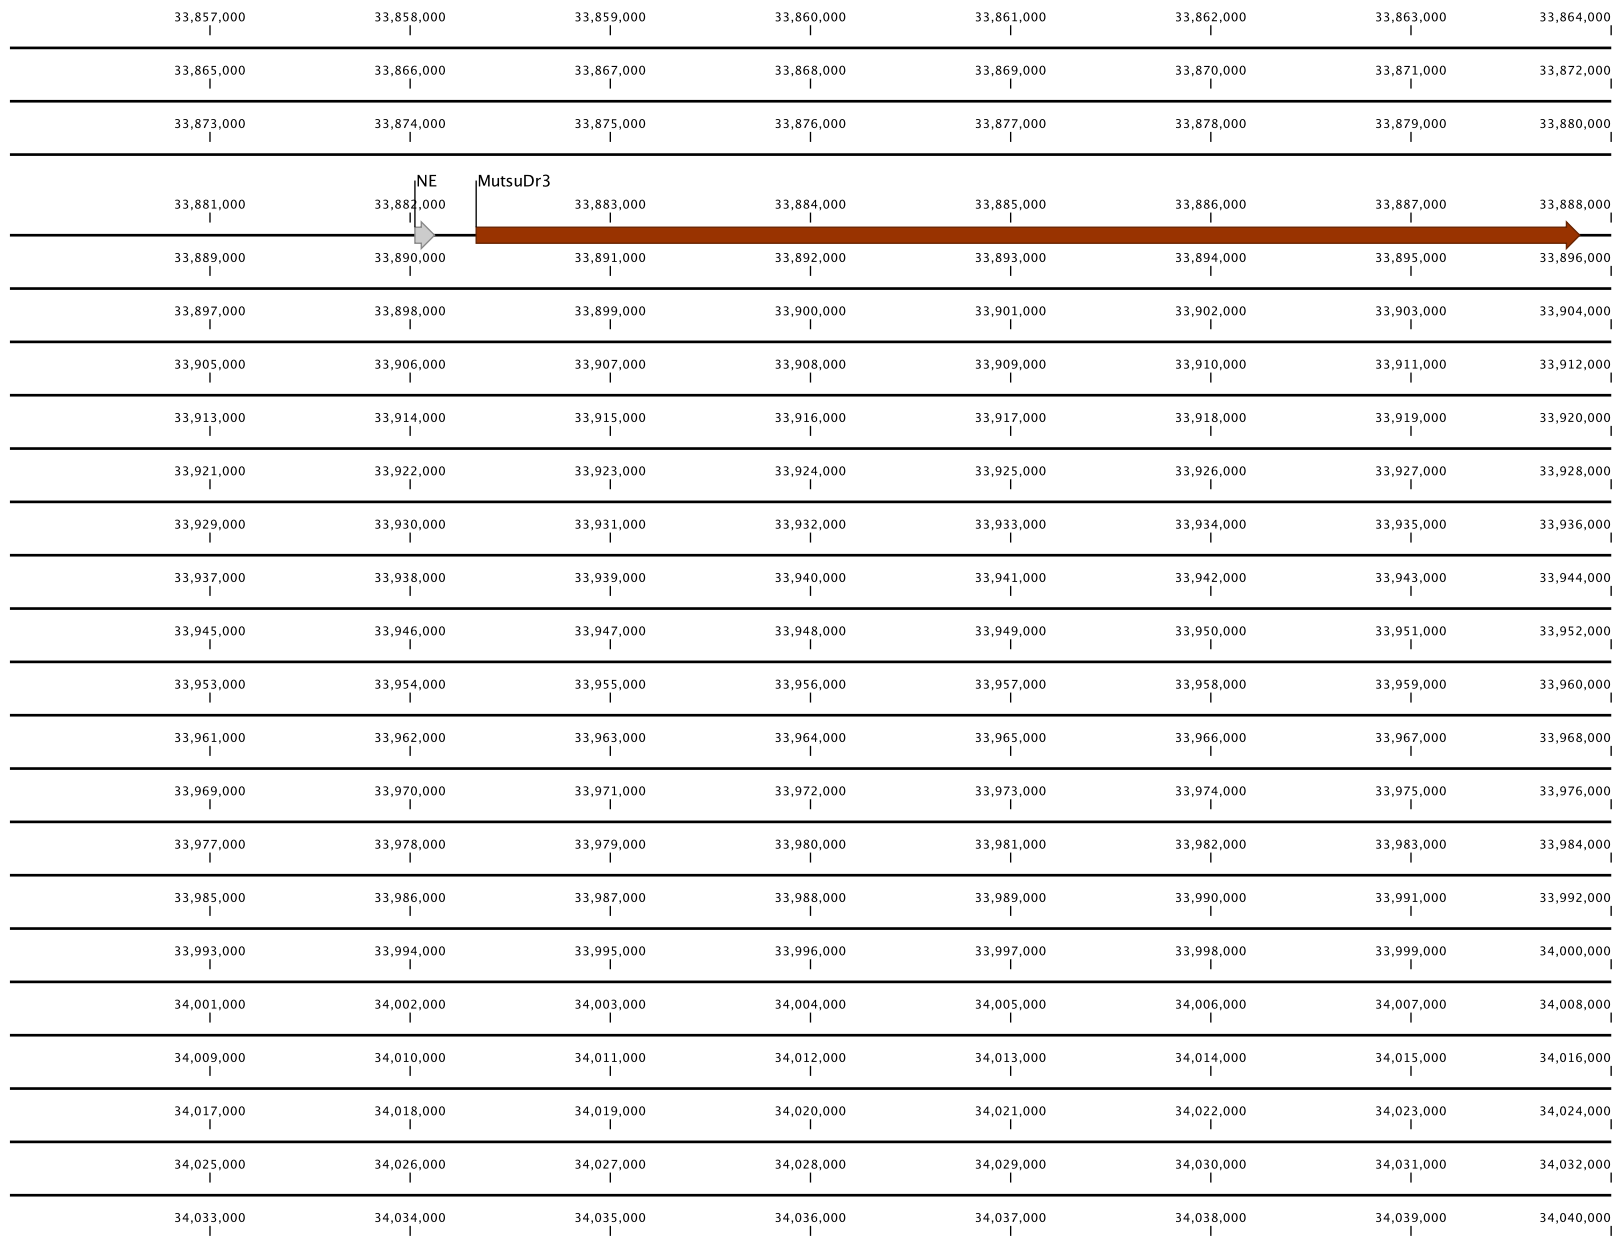

Supplemental Figure S8

|            |            |            |            |            |            |            |            |
|------------|------------|------------|------------|------------|------------|------------|------------|
| 34,041,000 | 34,042,000 | 34,043,000 | 34,044,000 | 34,045,000 | 34,046,000 | 34,047,000 | 34,048,000 |
| 34,049,000 | 34,050,000 | 34,051,000 | 34,052,000 | 34,053,000 | 34,054,000 | 34,055,000 | 34,056,000 |
| 34,057,000 | 34,058,000 | 34,059,000 | 34,060,000 | 34,061,000 | 34,062,000 | 34,063,000 | 34,064,000 |
| 34,065,000 | 34,066,000 | 34,067,000 | 34,068,000 | 34,069,000 | 34,070,000 | 34,071,000 | 34,072,000 |
| 34,073,000 | 34,074,000 | 34,075,000 | 34,076,000 | 34,077,000 | 34,078,000 | 34,079,000 | 34,080,000 |
| 34,081,000 | 34,082,000 | 34,083,000 | 34,084,000 | 34,085,000 | 34,086,000 | 34,087,000 | 34,088,000 |
| 34,089,000 | 34,090,000 | 34,091,000 | 34,092,000 | 34,093,000 | 34,094,000 | 34,095,000 | 34,096,000 |
| 34,097,000 | 34,098,000 | 34,099,000 | 34,100,000 | 34,101,000 | 34,102,000 | 34,103,000 | 34,104,000 |
| 34,105,000 | 34,106,000 | 34,107,000 | 34,108,000 | 34,109,000 | 34,110,000 | 34,111,000 | 34,112,000 |
| 34,113,000 | 34,114,000 | 34,115,000 | 34,116,000 | 34,117,000 | 34,118,000 | 34,119,000 | 34,120,000 |
| 34,121,000 | 34,122,000 | 34,123,000 | 34,124,000 | 34,125,000 | 34,126,000 | 34,127,000 | 34,128,000 |
| 34,129,000 | 34,130,000 | 34,131,000 | 34,132,000 | 34,133,000 | 34,134,000 | 34,135,000 | 34,136,000 |
| 34,137,000 | 34,138,000 | 34,139,000 | 34,140,000 | 34,141,000 | 34,142,000 | 34,143,000 | 34,144,000 |
| 34,145,000 | 34,146,000 | 34,147,000 | 34,148,000 | 34,149,000 | 34,150,000 | 34,151,000 | 34,152,000 |
| 34,153,000 | 34,154,000 | 34,155,000 | 34,156,000 | 34,157,000 | 34,158,000 | 34,159,000 | 34,160,000 |
| 34,161,000 | 34,162,000 | 34,163,000 | 34,164,000 | 34,165,000 | 34,166,000 | 34,167,000 | 34,168,000 |
| 34,169,000 | 34,170,000 | 34,171,000 | 34,172,000 | 34,173,000 | 34,174,000 | 34,175,000 | 34,176,000 |
| 34,177,000 | 34,178,000 | 34,179,000 | 34,180,000 | 34,181,000 | 34,182,000 | 34,183,000 | 34,184,000 |
| 34,185,000 | 34,186,000 | 34,187,000 | 34,188,000 | 34,189,000 | 34,190,000 | 34,191,000 | 34,192,000 |
| 34,193,000 | 34,194,000 | 34,195,000 | 34,196,000 | 34,197,000 | 34,198,000 | 34,199,000 | 34,200,000 |
| 34,201,000 | 34,202,000 | 34,203,000 | 34,204,000 | 34,205,000 | 34,206,000 | 34,207,000 | 34,208,000 |
| 34,209,000 | 34,210,000 | 34,211,000 | 34,212,000 | 34,213,000 | 34,214,000 | 34,215,000 | 34,216,000 |
| 34,217,000 | 34,218,000 | 34,219,000 | 34,220,000 | 34,221,000 | 34,222,000 | 34,223,000 | 34,224,000 |

Supplemental Figure S8

|            |            |            |            |            |            |            |            |
|------------|------------|------------|------------|------------|------------|------------|------------|
| 34,225,000 | 34,226,000 | 34,227,000 | 34,228,000 | 34,229,000 | 34,230,000 | 34,231,000 | 34,232,000 |
| 34,233,000 | 34,234,000 | 34,235,000 | 34,236,000 | 34,237,000 | 34,238,000 | 34,239,000 | 34,240,000 |
| 34,241,000 | 34,242,000 | 34,243,000 | 34,244,000 | 34,245,000 | 34,246,000 | 34,247,000 | 34,248,000 |
| 34,249,000 | 34,250,000 | 34,251,000 | 34,252,000 | 34,253,000 | 34,254,000 | 34,255,000 | 34,256,000 |
| 34,257,000 | 34,258,000 | 34,259,000 | 34,260,000 | 34,261,000 | 34,262,000 | 34,263,000 | 34,264,000 |
| 34,265,000 | 34,266,000 | 34,267,000 | 34,268,000 | 34,269,000 | 34,270,000 | 34,271,000 | 34,272,000 |
| 34,273,000 | 34,274,000 | 34,275,000 | 34,276,000 | 34,277,000 | 34,278,000 | 34,279,000 | 34,280,000 |
| 34,281,000 | 34,282,000 | 34,283,000 | 34,284,000 | 34,285,000 | 34,286,000 | 34,287,000 | 34,288,000 |
| 34,289,000 | 34,290,000 | 34,291,000 | 34,292,000 | 34,293,000 | 34,294,000 | 34,295,000 | 34,296,000 |
| 34,297,000 | 34,298,000 | 34,299,000 | 34,300,000 | 34,301,000 | 34,302,000 | 34,303,000 | 34,304,000 |
| 34,305,000 | 34,306,000 | 34,307,000 | 34,308,000 | 34,309,000 | 34,310,000 | 34,311,000 | 34,312,000 |
| 34,313,000 | 34,314,000 | 34,315,000 | 34,316,000 | 34,317,000 | 34,318,000 | 34,319,000 | 34,320,000 |
| 34,321,000 | 34,322,000 | 34,323,000 | 34,324,000 | 34,325,000 | 34,326,000 | 34,327,000 | 34,328,000 |
| 34,329,000 | 34,330,000 | 34,331,000 | 34,332,000 | 34,333,000 | 34,334,000 | 34,335,000 | 34,336,000 |
| 34,337,000 | 34,338,000 | 34,339,000 | 34,340,000 | 34,341,000 | 34,342,000 | 34,343,000 | 34,344,000 |
| 34,345,000 | 34,346,000 | 34,347,000 | 34,348,000 | 34,349,000 | 34,350,000 | 34,351,000 | 34,352,000 |
| 34,353,000 | 34,354,000 | 34,355,000 | 34,356,000 | 34,357,000 | 34,358,000 | 34,359,000 | 34,360,000 |
| 34,361,000 | 34,362,000 | 34,363,000 | 34,364,000 | 34,365,000 | 34,366,000 | 34,367,000 | 34,368,000 |
| 34,369,000 | 34,370,000 | 34,371,000 | 34,372,000 | 34,373,000 | 34,374,000 | 34,375,000 | 34,376,000 |
| 34,377,000 | 34,378,000 | 34,379,000 | 34,380,000 | 34,381,000 | 34,382,000 | 34,383,000 | 34,384,000 |
| 34,385,000 | 34,386,000 | 34,387,000 | 34,388,000 | 34,389,000 | 34,390,000 | 34,391,000 | 34,392,000 |
| 34,393,000 | 34,394,000 | 34,395,000 | 34,396,000 | 34,397,000 | 34,398,000 | 34,399,000 | 34,400,000 |
| 34,401,000 | 34,402,000 | 34,403,000 | 34,404,000 | 34,405,000 | 34,406,000 | 34,407,000 | 34,408,000 |

NE  


Supplemental Figure S8

|            |            |            |            |            |            |            |            |
|------------|------------|------------|------------|------------|------------|------------|------------|
| 34,409,000 | 34,410,000 | 34,411,000 | 34,412,000 | 34,413,000 | 34,414,000 | 34,415,000 | 34,416,000 |
| 34,417,000 | 34,418,000 | 34,419,000 | 34,420,000 | 34,421,000 | 34,422,000 | 34,423,000 | 34,424,000 |
| 34,425,000 | 34,426,000 | 34,427,000 | 34,428,000 | 34,429,000 | 34,430,000 | 34,431,000 | 34,432,000 |
| 34,433,000 | 34,434,000 | 34,435,000 | 34,436,000 | 34,437,000 | 34,438,000 | 34,439,000 | 34,440,000 |
| 34,441,000 | 34,442,000 | 34,443,000 | 34,444,000 | 34,445,000 | 34,446,000 | 34,447,000 | 34,448,000 |
| 34,449,000 | 34,450,000 | 34,451,000 | 34,452,000 | 34,453,000 | 34,454,000 | 34,455,000 | 34,456,000 |
| 34,457,000 | 34,458,000 | 34,459,000 | 34,460,000 | 34,461,000 | 34,462,000 | 34,463,000 | 34,464,000 |
| 34,465,000 | 34,466,000 | 34,467,000 | 34,468,000 | 34,469,000 | 34,470,000 | 34,471,000 | 34,472,000 |
| 34,473,000 | 34,474,000 | 34,475,000 | 34,476,000 | 34,477,000 | 34,478,000 | 34,479,000 | 34,480,000 |
| 34,481,000 | 34,482,000 | 34,483,000 | 34,484,000 | 34,485,000 | 34,486,000 | 34,487,000 | 34,488,000 |
| 34,489,000 | 34,490,000 | 34,491,000 | 34,492,000 | 34,493,000 | 34,494,000 | 34,495,000 | 34,496,000 |
| 34,497,000 | 34,498,000 | 34,499,000 | 34,500,000 | 34,501,000 | 34,502,000 | 34,503,000 | 34,504,000 |
| 34,505,000 | 34,506,000 | 34,507,000 | 34,508,000 | 34,509,000 | 34,510,000 | 34,511,000 | 34,512,000 |
| 34,513,000 | 34,514,000 | 34,515,000 | 34,516,000 | 34,517,000 | 34,518,000 | 34,519,000 | 34,520,000 |
| 34,521,000 | 34,522,000 | 34,523,000 | 34,524,000 | 34,525,000 | 34,526,000 | 34,527,000 | 34,528,000 |
| 34,529,000 | 34,530,000 | 34,531,000 | 34,532,000 | 34,533,000 | 34,534,000 | 34,535,000 | 34,536,000 |
| 34,537,000 | 34,538,000 | 34,539,000 | 34,540,000 | 34,541,000 | 34,542,000 | 34,543,000 | 34,544,000 |
| 34,545,000 | 34,546,000 | 34,547,000 | 34,548,000 | 34,549,000 | 34,550,000 | 34,551,000 | 34,552,000 |
| 34,553,000 | 34,554,000 | 34,555,000 | 34,556,000 | 34,557,000 | 34,558,000 | 34,559,000 | 34,560,000 |
| 34,561,000 | 34,562,000 | 34,563,000 | 34,564,000 | 34,565,000 | 34,566,000 | 34,567,000 | 34,568,000 |
| 34,569,000 | 34,570,000 | 34,571,000 | 34,572,000 | 34,573,000 | 34,574,000 | 34,575,000 | 34,576,000 |
| 34,577,000 | 34,578,000 | 34,579,000 | 34,580,000 | 34,581,000 | 34,582,000 | 34,583,000 | 34,584,000 |
| 34,585,000 | 34,586,000 | 34,587,000 | 34,588,000 | 34,589,000 | 34,590,000 | 34,591,000 | 34,592,000 |

MutsuDr2

Supplemental Figure S8

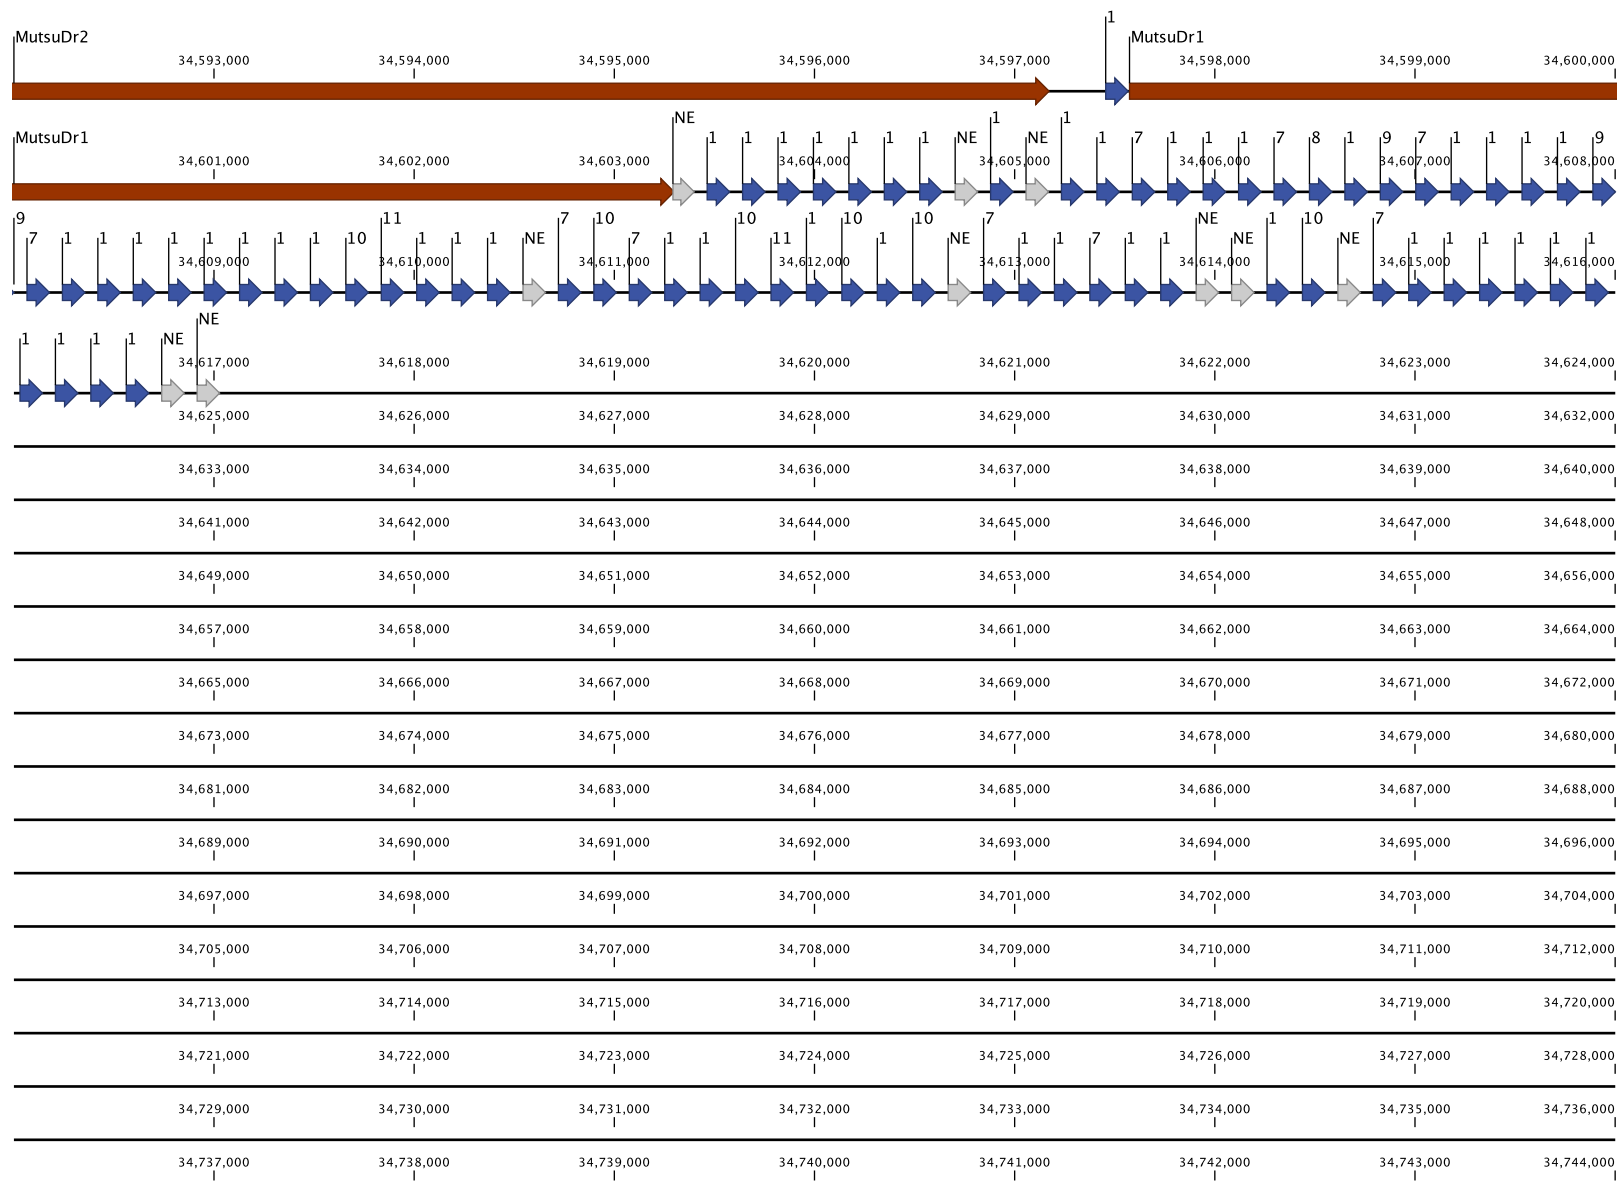

Supplemental Figure S8

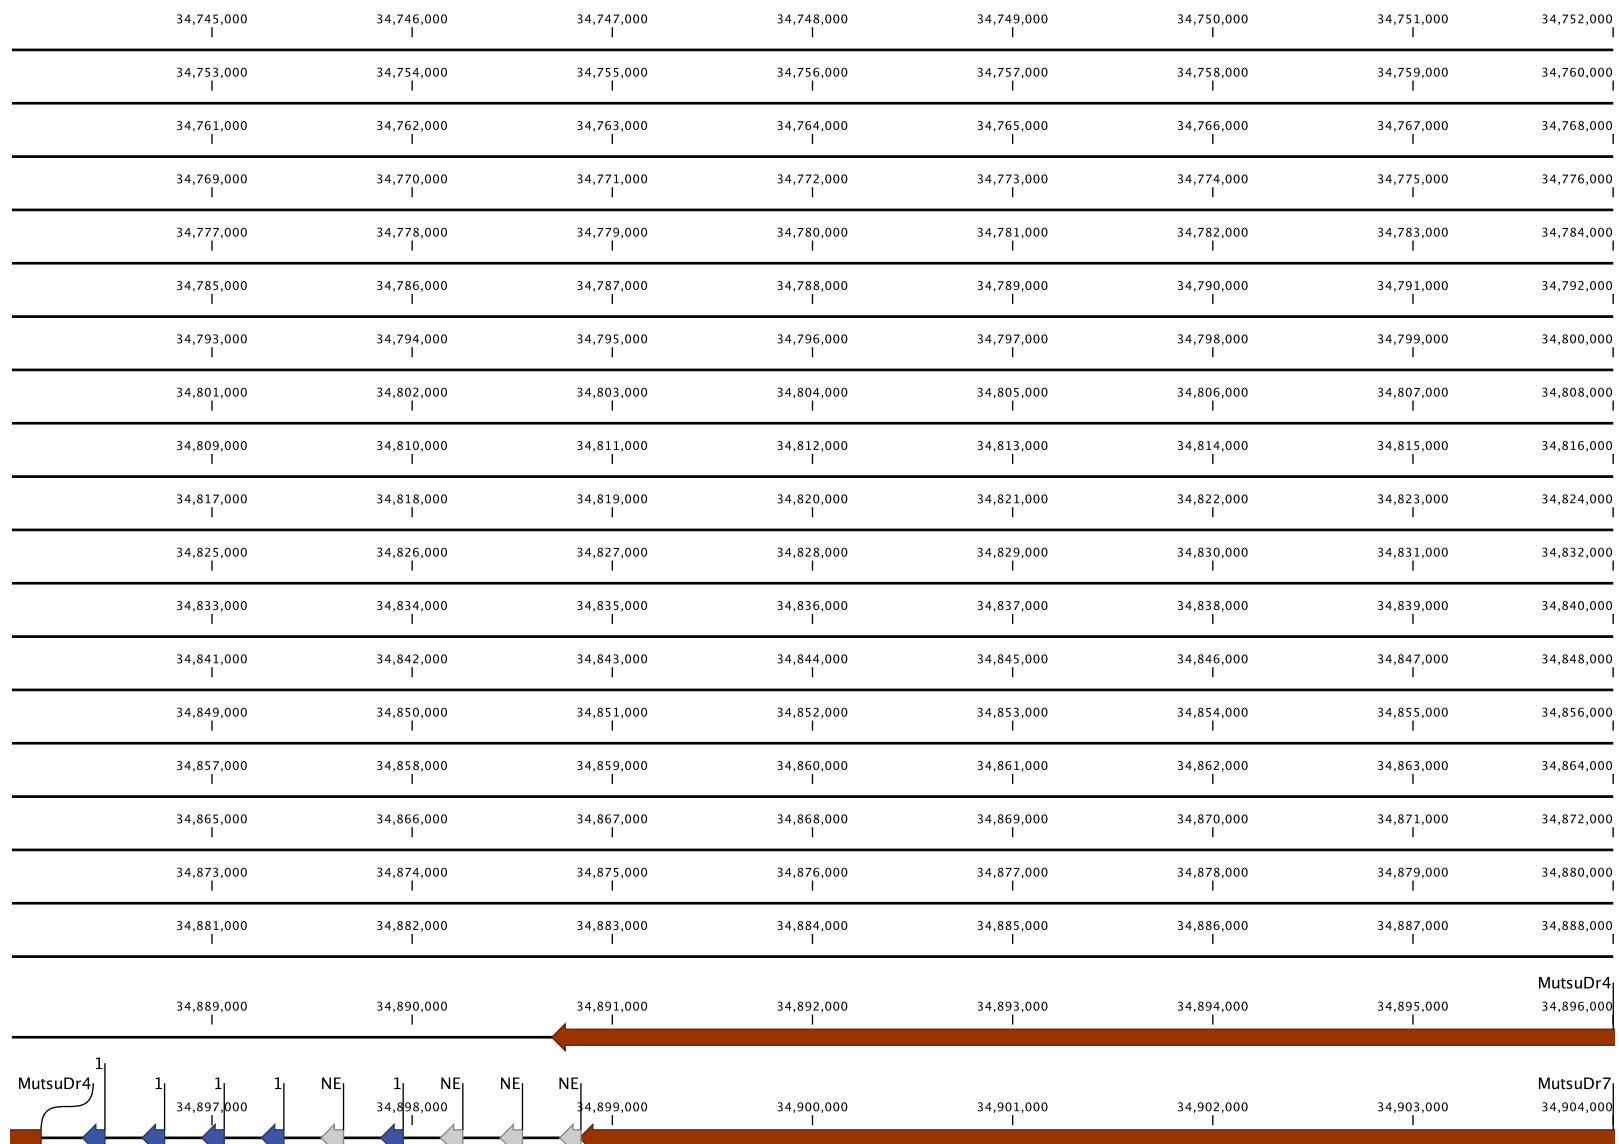

Supplemental Figure S8

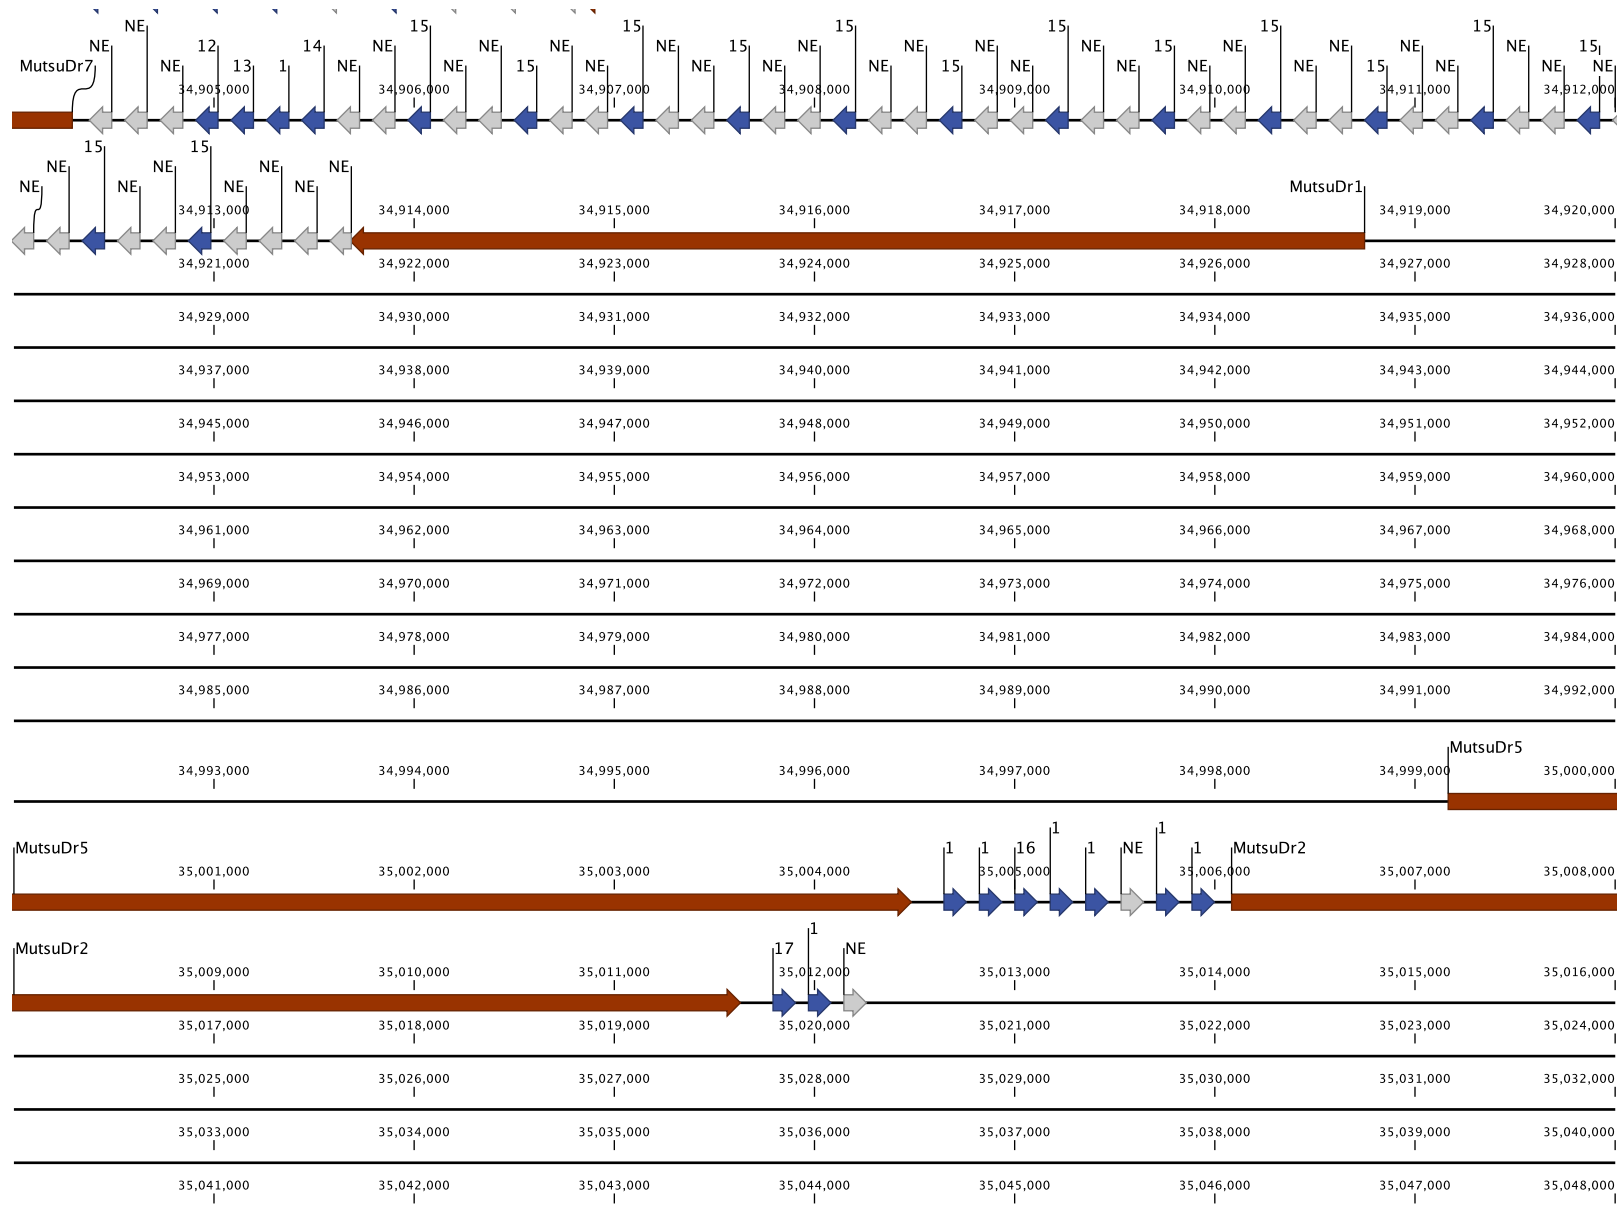

Supplemental Figure S8

|            |            |            |            |            |            |            |            |
|------------|------------|------------|------------|------------|------------|------------|------------|
| 35,049,000 | 35,050,000 | 35,051,000 | 35,052,000 | 35,053,000 | 35,054,000 | 35,055,000 | 35,056,000 |
| 35,057,000 | 35,058,000 | 35,059,000 | 35,060,000 | 35,061,000 | 35,062,000 | 35,063,000 | 35,064,000 |
| 35,065,000 | 35,066,000 | 35,067,000 | 35,068,000 | 35,069,000 | 35,070,000 | 35,071,000 | 35,072,000 |
| 35,073,000 | 35,074,000 | 35,075,000 | 35,076,000 | 35,077,000 | 35,078,000 | 35,079,000 | 35,080,000 |
| 35,081,000 | 35,082,000 | 35,083,000 | 35,084,000 | 35,085,000 | 35,086,000 | 35,087,000 | 35,088,000 |
| 35,089,000 | 35,090,000 | 35,091,000 | 35,092,000 | 35,093,000 | 35,094,000 | 35,095,000 | 35,096,000 |
| 35,097,000 | 35,098,000 | 35,099,000 | 35,100,000 | 35,101,000 | 35,102,000 | 35,103,000 | 35,104,000 |
| 35,105,000 | 35,106,000 | 35,107,000 | 35,108,000 | 35,109,000 | 35,110,000 | 35,111,000 | 35,112,000 |
| 35,113,000 | 35,114,000 | 35,115,000 | 35,116,000 | 35,117,000 | 35,118,000 | 35,119,000 | 35,120,000 |
| 35,121,000 | 35,122,000 | 35,123,000 | 35,124,000 | 35,125,000 | 35,126,000 | 35,127,000 | 35,128,000 |
| 35,129,000 | 35,130,000 | 35,131,000 | 35,132,000 | 35,133,000 | 35,134,000 | 35,135,000 | 35,136,000 |
| 35,137,000 | 35,138,000 | 35,139,000 | 35,140,000 | 35,141,000 | 35,142,000 | 35,143,000 | 35,144,000 |
| 35,145,000 | 35,146,000 | 35,147,000 | 35,148,000 | 35,149,000 | 35,150,000 | 35,151,000 | 35,152,000 |
| 35,153,000 | 35,154,000 | 35,155,000 | 35,156,000 | 35,157,000 | 35,158,000 | 35,159,000 | 35,160,000 |
| 35,161,000 | 35,162,000 | 35,163,000 | 35,164,000 | 35,165,000 | 35,166,000 | 35,167,000 | 35,168,000 |
| 35,169,000 | 35,170,000 | 35,171,000 | 35,172,000 | 35,173,000 | 35,174,000 | 35,175,000 | 35,176,000 |
| 35,177,000 | 35,178,000 | 35,179,000 | 35,180,000 | 35,181,000 | 35,182,000 | 35,183,000 | 35,184,000 |
| 35,185,000 | 35,186,000 | 35,187,000 | 35,188,000 | 35,189,000 | 35,190,000 | 35,191,000 | 35,192,000 |
| 35,193,000 | 35,194,000 | 35,195,000 | 35,196,000 | 35,197,000 | 35,198,000 | 35,199,000 | 35,200,000 |
| 35,201,000 | 35,202,000 | 35,203,000 | 35,204,000 | 35,205,000 | 35,206,000 | 35,207,000 | 35,208,000 |
| 35,209,000 | 35,210,000 | 35,211,000 | 35,212,000 | 35,213,000 | 35,214,000 | 35,215,000 | 35,216,000 |
| 35,217,000 | 35,218,000 | 35,219,000 | 35,220,000 | 35,221,000 | 35,222,000 | 35,223,000 | 35,224,000 |

NE

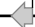

NE

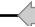



Supplemental Figure S8

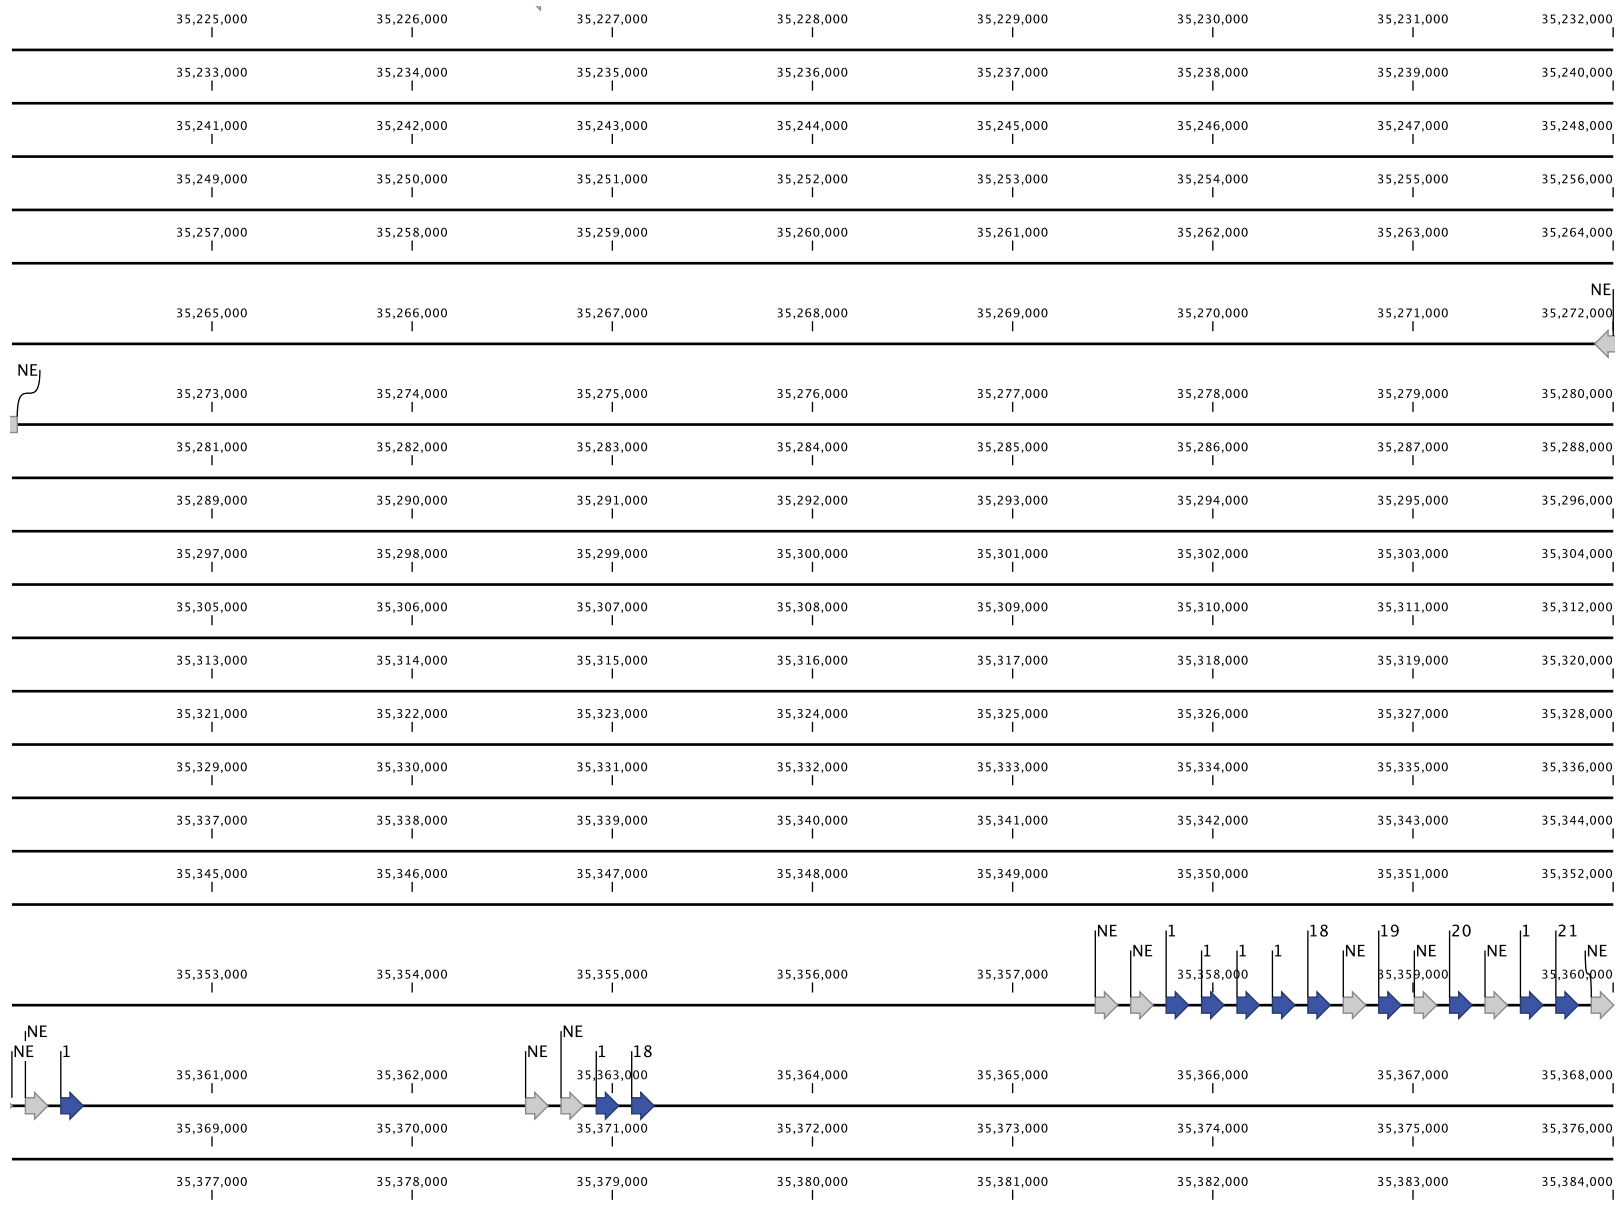

Supplemental Figure S8

|            |            |            |            |            |            |            |            |
|------------|------------|------------|------------|------------|------------|------------|------------|
| 35,385,000 | 35,386,000 | 35,387,000 | 35,388,000 | 35,389,000 | 35,390,000 | 35,391,000 | 35,392,000 |
| 35,393,000 | 35,394,000 | 35,395,000 | 35,396,000 | 35,397,000 | 35,398,000 | 35,399,000 | 35,400,000 |
| 35,401,000 | 35,402,000 | 35,403,000 | 35,404,000 | 35,405,000 | 35,406,000 | 35,407,000 | 35,408,000 |
| 35,409,000 | 35,410,000 | 35,411,000 | 35,412,000 | 35,413,000 | 35,414,000 | 35,415,000 | 35,416,000 |
| 35,417,000 | 35,418,000 | 35,419,000 | 35,420,000 | 35,421,000 | 35,422,000 | 35,423,000 | 35,424,000 |
| 35,425,000 | 35,426,000 | 35,427,000 | 35,428,000 | 35,429,000 | 35,430,000 | 35,431,000 | 35,432,000 |
| 35,433,000 | 35,434,000 | 35,435,000 | 35,436,000 | 35,437,000 | 35,438,000 | 35,439,000 | 35,440,000 |
| 35,441,000 | 35,442,000 | 35,443,000 | 35,444,000 | 35,445,000 | 35,446,000 | 35,447,000 | 35,448,000 |
| 35,449,000 | 35,450,000 | 35,451,000 | 35,452,000 | 35,453,000 | 35,454,000 | 35,455,000 | 35,456,000 |
| 35,457,000 | 35,458,000 | 35,459,000 | 35,460,000 | 35,461,000 | 35,462,000 | 35,463,000 | 35,464,000 |
| 35,465,000 | 35,466,000 | 35,467,000 | 35,468,000 | 35,469,000 | 35,470,000 | 35,471,000 | 35,472,000 |
| 35,473,000 | 35,474,000 | 35,475,000 | 35,476,000 | 35,477,000 | 35,478,000 | 35,479,000 | 35,480,000 |
| 35,481,000 | 35,482,000 | 35,483,000 | 35,484,000 | 35,485,000 | 35,486,000 | 35,487,000 | 35,488,000 |
| 35,489,000 | 35,490,000 | 35,491,000 | 35,492,000 | 35,493,000 | 35,494,000 | 35,495,000 | 35,496,000 |
| 35,497,000 | 35,498,000 | 35,499,000 | 35,500,000 | 35,501,000 | 35,502,000 | 35,503,000 | 35,504,000 |
| 35,505,000 | 35,506,000 | 35,507,000 | 35,508,000 | 35,509,000 | 35,510,000 | 35,511,000 | 35,512,000 |
| 35,513,000 | 35,514,000 | 35,515,000 | 35,516,000 | 35,517,000 | 35,518,000 | 35,519,000 | 35,520,000 |
| 35,521,000 | 35,522,000 | 35,523,000 | 35,524,000 | 35,525,000 | 35,526,000 | 35,527,000 | 35,528,000 |
| 35,529,000 | 35,530,000 | 35,531,000 | 35,532,000 | 35,533,000 | 35,534,000 | 35,535,000 | 35,536,000 |
| 35,537,000 | 35,538,000 | 35,539,000 | 35,540,000 | 35,541,000 | 35,542,000 | 35,543,000 | 35,544,000 |
| 35,545,000 | 35,546,000 | 35,547,000 | 35,548,000 | 35,549,000 | 35,550,000 | 35,551,000 | 35,552,000 |
| 35,553,000 | 35,554,000 | 35,555,000 | 35,556,000 | 35,557,000 | 35,558,000 | 35,559,000 | 35,560,000 |

NE

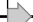

Supplemental Figure S8

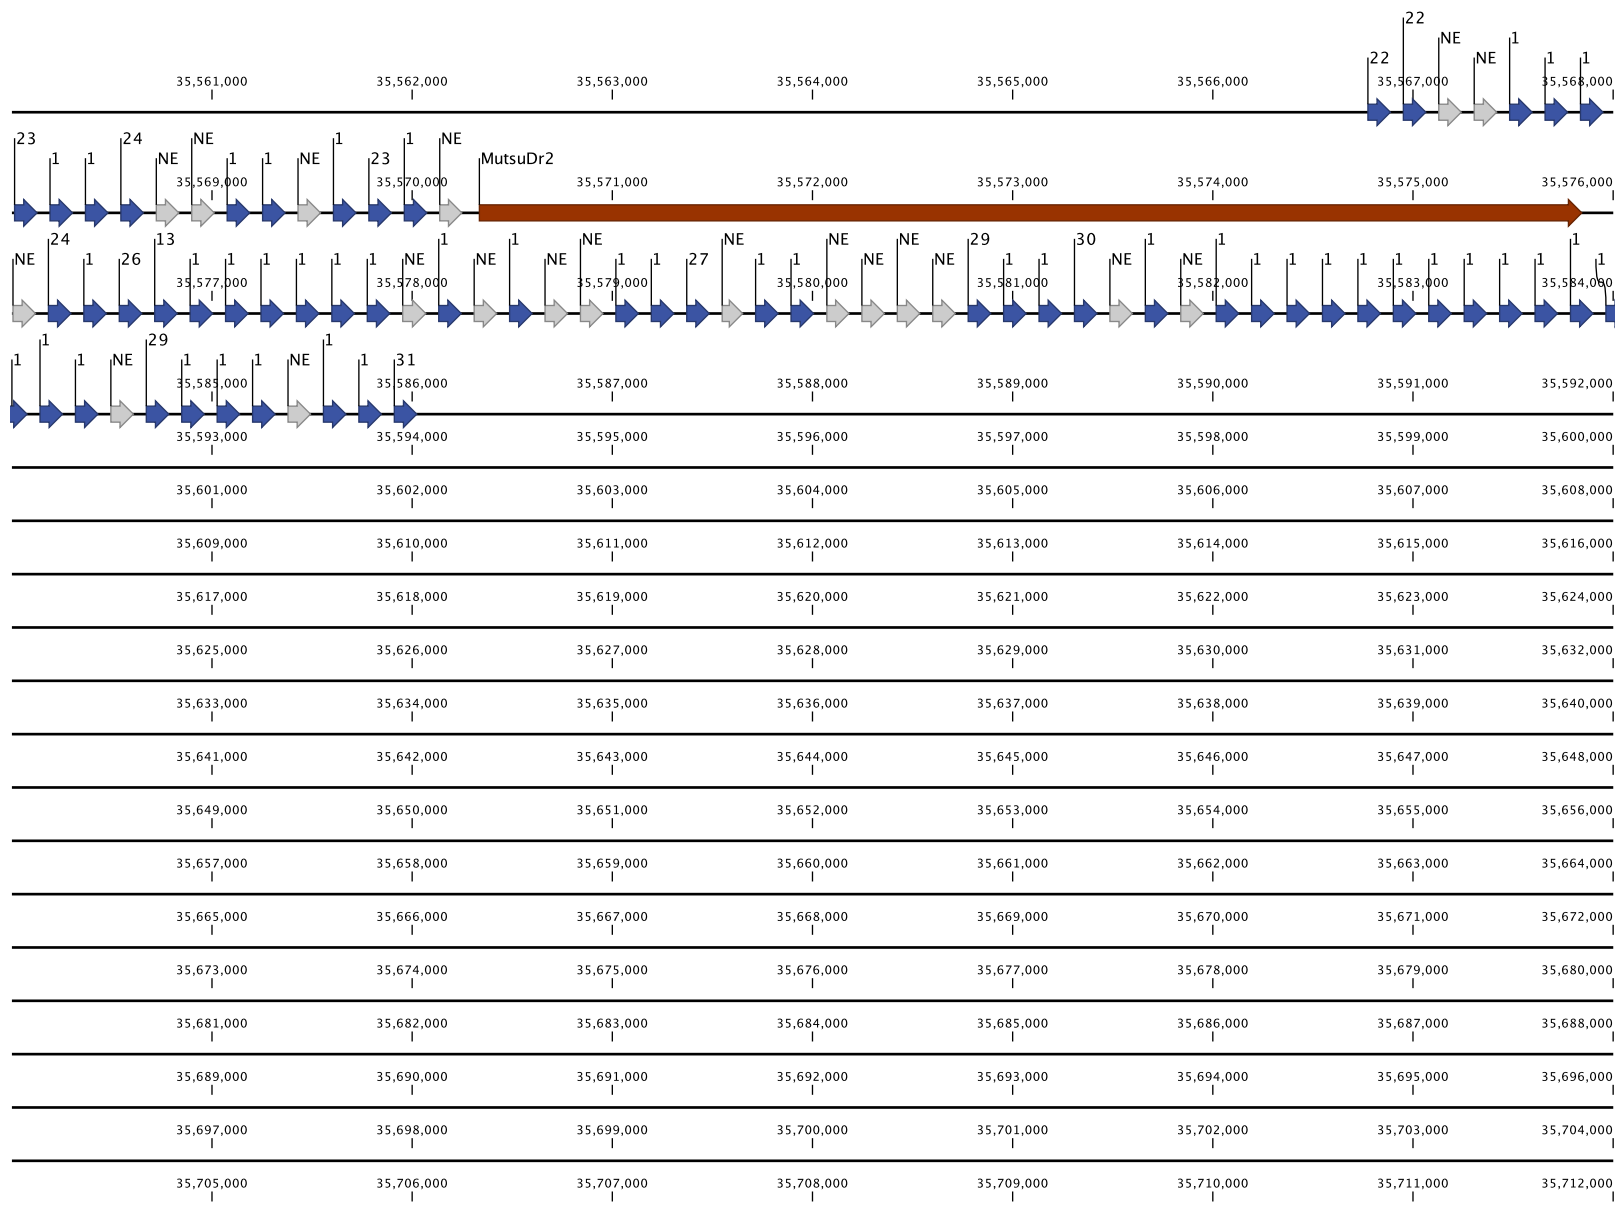

Supplemental Figure S8

|            |            |            |            |            |            |            |            |
|------------|------------|------------|------------|------------|------------|------------|------------|
| 35,713,000 | 35,714,000 | 35,715,000 | 35,716,000 | 35,717,000 | 35,718,000 | 35,719,000 | 35,720,000 |
| 35,721,000 | 35,722,000 | 35,723,000 | 35,724,000 | 35,725,000 | 35,726,000 | 35,727,000 | 35,728,000 |
| 35,729,000 | 35,730,000 | 35,731,000 | 35,732,000 | 35,733,000 | 35,734,000 | 35,735,000 | 35,736,000 |
| 35,737,000 | 35,738,000 | 35,739,000 | 35,740,000 | 35,741,000 | 35,742,000 | 35,743,000 | 35,744,000 |
| 35,745,000 | 35,746,000 | 35,747,000 | 35,748,000 | 35,749,000 | 35,750,000 | 35,751,000 | 35,752,000 |
| 35,753,000 | 35,754,000 | 35,755,000 | 35,756,000 | 35,757,000 | 35,758,000 | 35,759,000 | 35,760,000 |
| 35,761,000 | 35,762,000 | 35,763,000 | 35,764,000 | 35,765,000 | 35,766,000 | 35,767,000 | 35,768,000 |
| 35,769,000 | 35,770,000 | 35,771,000 | 35,772,000 | 35,773,000 | 35,774,000 | 35,775,000 | 35,776,000 |
| 35,777,000 | 35,778,000 | 35,779,000 | 35,780,000 | 35,781,000 | 35,782,000 | 35,783,000 | 35,784,000 |
| 35,785,000 | 35,786,000 | 35,787,000 | 35,788,000 | 35,789,000 | 35,790,000 | 35,791,000 | 35,792,000 |
| 35,793,000 | 35,794,000 | 35,795,000 | 35,796,000 | 35,797,000 | 35,798,000 | 35,799,000 | 35,800,000 |
| 35,801,000 | 35,802,000 | 35,803,000 | 35,804,000 | 35,805,000 | 35,806,000 | 35,807,000 | 35,808,000 |
| 35,809,000 | 35,810,000 | 35,811,000 | 35,812,000 | 35,813,000 | 35,814,000 | 35,815,000 | 35,816,000 |
| 35,817,000 | 35,818,000 | 35,819,000 | 35,820,000 | 35,821,000 | 35,822,000 | 35,823,000 | 35,824,000 |
| 35,825,000 | 35,826,000 | 35,827,000 | 35,828,000 | 35,829,000 | 35,830,000 | 35,831,000 | 35,832,000 |
| 35,833,000 | 35,834,000 | 35,835,000 | 35,836,000 | 35,837,000 | 35,838,000 | 35,839,000 | 35,840,000 |
| 35,841,000 | 35,842,000 | 35,843,000 | 35,844,000 | 35,845,000 | 35,846,000 | 35,847,000 | 35,848,000 |
| 35,849,000 | 35,850,000 | 35,851,000 | 35,852,000 | 35,853,000 | 35,854,000 | 35,855,000 | 35,856,000 |
| 35,857,000 | 35,858,000 | 35,859,000 | 35,860,000 | 35,861,000 | 35,862,000 | 35,863,000 | 35,864,000 |
| 35,865,000 | 35,866,000 | 35,867,000 | 35,868,000 | 35,869,000 | 35,870,000 | 35,871,000 | 35,872,000 |
| 35,873,000 | 35,874,000 | 35,875,000 | 35,876,000 | 35,877,000 | 35,878,000 | 35,879,000 | 35,880,000 |
| 35,881,000 | 35,882,000 | 35,883,000 | 35,884,000 | 35,885,000 | 35,886,000 | 35,887,000 | 35,888,000 |
| 35,889,000 | 35,890,000 | 35,891,000 | 35,892,000 | 35,893,000 | 35,894,000 | 35,895,000 | 35,896,000 |

Supplemental Figure S8

|            |            |            |            |            |            |            |            |
|------------|------------|------------|------------|------------|------------|------------|------------|
| 35,897,000 | 35,898,000 | 35,899,000 | 35,900,000 | 35,901,000 | 35,902,000 | 35,903,000 | 35,904,000 |
| 35,905,000 | 35,906,000 | 35,907,000 | 35,908,000 | 35,909,000 | 35,910,000 | 35,911,000 | 35,912,000 |
| 35,913,000 | 35,914,000 | 35,915,000 | 35,916,000 | 35,917,000 | 35,918,000 | 35,919,000 | 35,920,000 |
| 35,921,000 | 35,922,000 | 35,923,000 | 35,924,000 | 35,925,000 | 35,926,000 | 35,927,000 | 35,928,000 |
| 35,929,000 | 35,930,000 | 35,931,000 | 35,932,000 | 35,933,000 | 35,934,000 | 35,935,000 | 35,936,000 |
| 35,937,000 | 35,938,000 | 35,939,000 | 35,940,000 | 35,941,000 | 35,942,000 | 35,943,000 | 35,944,000 |
| 35,945,000 | 35,946,000 | 35,947,000 | 35,948,000 | 35,949,000 | 35,950,000 | 35,951,000 | 35,952,000 |
| 35,953,000 | 35,954,000 | 35,955,000 | 35,956,000 | 35,957,000 | 35,958,000 | 35,959,000 | 35,960,000 |
| 35,961,000 | 35,962,000 | 35,963,000 | 35,964,000 | 35,965,000 | 35,966,000 | 35,967,000 | 35,968,000 |
| 35,969,000 | 35,970,000 | 35,971,000 | 35,972,000 | 35,973,000 | 35,974,000 | 35,975,000 | 35,976,000 |
| 35,977,000 | 35,978,000 | 35,979,000 | 35,980,000 | 35,981,000 | 35,982,000 | 35,983,000 | 35,984,000 |
| 35,985,000 | 35,986,000 | 35,987,000 | 35,988,000 | 35,989,000 | 35,990,000 | 35,991,000 | 35,992,000 |
| 35,993,000 | 35,994,000 | 35,995,000 | 35,996,000 | 35,997,000 | 35,998,000 | 35,999,000 | 36,000,000 |
| 36,001,000 | 36,002,000 | 36,003,000 | 36,004,000 | 36,005,000 | 36,006,000 | 36,007,000 | 36,008,000 |
| 36,009,000 | 36,010,000 | 36,011,000 | 36,012,000 | 36,013,000 | 36,014,000 | 36,015,000 | 36,016,000 |
| 36,017,000 | 36,018,000 | 36,019,000 | 36,020,000 | 36,021,000 | 36,022,000 | 36,023,000 | 36,024,000 |
| 36,025,000 | 36,026,000 | 36,027,000 | 36,028,000 | 36,029,000 | 36,030,000 | 36,031,000 | 36,032,000 |
| 36,033,000 | 36,034,000 | 36,035,000 | 36,036,000 | 36,037,000 | 36,038,000 | 36,039,000 | 36,040,000 |
| 36,041,000 | 36,042,000 | 36,043,000 | 36,044,000 | 36,045,000 | 36,046,000 | 36,047,000 | 36,048,000 |
| 36,049,000 | 36,050,000 | 36,051,000 | 36,052,000 | 36,053,000 | 36,054,000 | 36,055,000 | 36,056,000 |
| 36,057,000 | 36,058,000 | 36,059,000 | 36,060,000 | 36,061,000 | 36,062,000 | 36,063,000 | 36,064,000 |
| 36,065,000 | 36,066,000 | 36,067,000 | 36,068,000 | 36,069,000 | 36,070,000 | 36,071,000 | 36,072,000 |
| 36,073,000 | 36,074,000 | 36,075,000 | 36,076,000 | 36,077,000 | 36,078,000 | 36,079,000 | 36,080,000 |

NE

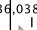

Supplemental Figure S8

|            |            |            |            |            |            |            |            |
|------------|------------|------------|------------|------------|------------|------------|------------|
| 36,081,000 | 36,082,000 | 36,083,000 | 36,084,000 | 36,085,000 | 36,086,000 | 36,087,000 | 36,088,000 |
| 36,089,000 | 36,090,000 | 36,091,000 | 36,092,000 | 36,093,000 | 36,094,000 | 36,095,000 | 36,096,000 |
| 36,097,000 | 36,098,000 | 36,099,000 | 36,100,000 | 36,101,000 | 36,102,000 | 36,103,000 | 36,104,000 |
| 36,105,000 | 36,106,000 | 36,107,000 | 36,108,000 | 36,109,000 | 36,110,000 | 36,111,000 | 36,112,000 |
| 36,113,000 | 36,114,000 | 36,115,000 | 36,116,000 | 36,117,000 | 36,118,000 | 36,119,000 | 36,120,000 |
| 36,121,000 | 36,122,000 | 36,123,000 | 36,124,000 | 36,125,000 | 36,126,000 | 36,127,000 | 36,128,000 |
| 36,129,000 | 36,130,000 | 36,131,000 | 36,132,000 | 36,133,000 | 36,134,000 | 36,135,000 | 36,136,000 |
| 36,137,000 | 36,138,000 | 36,139,000 | 36,140,000 | 36,141,000 | 36,142,000 | 36,143,000 | 36,144,000 |
| 36,145,000 | 36,146,000 | 36,147,000 | 36,148,000 | 36,149,000 | 36,150,000 | 36,151,000 | 36,152,000 |
| 36,153,000 | 36,154,000 | 36,155,000 | 36,156,000 | 36,157,000 | 36,158,000 | 36,159,000 | 36,160,000 |
| 36,161,000 | 36,162,000 | 36,163,000 | 36,164,000 | 36,165,000 | 36,166,000 | 36,167,000 | 36,168,000 |
| 36,169,000 | 36,170,000 | 36,171,000 | 36,172,000 | 36,173,000 | 36,174,000 | 36,175,000 | 36,176,000 |
| 36,177,000 | 36,178,000 | 36,179,000 | 36,180,000 | 36,181,000 | 36,182,000 | 36,183,000 | 36,184,000 |
| 36,185,000 | 36,186,000 | 36,187,000 | 36,188,000 | 36,189,000 | 36,190,000 | 36,191,000 | 36,192,000 |
| 36,193,000 | 36,194,000 | 36,195,000 | 36,196,000 | 36,197,000 | 36,198,000 | 36,199,000 | 36,200,000 |
| 36,201,000 | 36,202,000 | 36,203,000 | 36,204,000 | 36,205,000 | 36,206,000 | 36,207,000 | 36,208,000 |
| 36,209,000 | 36,210,000 | 36,211,000 | 36,212,000 | 36,213,000 | 36,214,000 | 36,215,000 | 36,216,000 |
| 36,217,000 | 36,218,000 | 36,219,000 | 36,220,000 | 36,221,000 | 36,222,000 | 36,223,000 | 36,224,000 |
| 36,225,000 | 36,226,000 | 36,227,000 | 36,228,000 | 36,229,000 | 36,230,000 | 36,231,000 | 36,232,000 |
| 36,233,000 | 36,234,000 | 36,235,000 | 36,236,000 | 36,237,000 | 36,238,000 | 36,239,000 | 36,240,000 |
| 36,241,000 | 36,242,000 | 36,243,000 | 36,244,000 | 36,245,000 | 36,246,000 | 36,247,000 | 36,248,000 |
| 36,249,000 | 36,250,000 | 36,251,000 | 36,252,000 | 36,253,000 | 36,254,000 | 36,255,000 | 36,256,000 |
| 36,257,000 | 36,258,000 | 36,259,000 | 36,260,000 | 36,261,000 | 36,262,000 | 36,263,000 | 36,264,000 |

NE

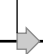

Supplemental Figure S8

|            |            |            |            |            |            |            |            |
|------------|------------|------------|------------|------------|------------|------------|------------|
| 36,265,000 | 36,266,000 | 36,267,000 | 36,268,000 | 36,269,000 | 36,270,000 | 36,271,000 | 36,272,000 |
| 36,273,000 | 36,274,000 | 36,275,000 | 36,276,000 | 36,277,000 | 36,278,000 | 36,279,000 | 36,280,000 |
| 36,281,000 | 36,282,000 | 36,283,000 | 36,284,000 | 36,285,000 | 36,286,000 | 36,287,000 | 36,288,000 |
| 36,289,000 | 36,290,000 | 36,291,000 | 36,292,000 | 36,293,000 | 36,294,000 | 36,295,000 | 36,296,000 |
| 36,297,000 | 36,298,000 | 36,299,000 | 36,300,000 | 36,301,000 | 36,302,000 | 36,303,000 | 36,304,000 |
| 36,305,000 | 36,306,000 | 36,307,000 | 36,308,000 | 36,309,000 | 36,310,000 | 36,311,000 | 36,312,000 |
| 36,313,000 | 36,314,000 | 36,315,000 | 36,316,000 | 36,317,000 | 36,318,000 | 36,319,000 | 36,320,000 |
| 36,321,000 | 36,322,000 | 36,323,000 | 36,324,000 | 36,325,000 | 36,326,000 | 36,327,000 | 36,328,000 |
| 36,329,000 | 36,330,000 | 36,331,000 | 36,332,000 | 36,333,000 | 36,334,000 | 36,335,000 | 36,336,000 |
| 36,337,000 | 36,338,000 | 36,339,000 | 36,340,000 | 36,341,000 | 36,342,000 | 36,343,000 | 36,344,000 |
| 36,345,000 | 36,346,000 | 36,347,000 | 36,348,000 | 36,349,000 | 36,350,000 | 36,351,000 | 36,352,000 |
| 36,353,000 | 36,354,000 | 36,355,000 | 36,356,000 | 36,357,000 | 36,358,000 | 36,359,000 | 36,360,000 |
| 36,361,000 | 36,362,000 | 36,363,000 | 36,364,000 | 36,365,000 | 36,366,000 | 36,367,000 | 36,368,000 |
| 36,369,000 | 36,370,000 | 36,371,000 | 36,372,000 | 36,373,000 | 36,374,000 | 36,375,000 | 36,376,000 |
| 36,377,000 | 36,378,000 | 36,379,000 | 36,380,000 | 36,381,000 | 36,382,000 | 36,383,000 | 36,384,000 |
| 36,385,000 | 36,386,000 | 36,387,000 | 36,388,000 | 36,389,000 | 36,390,000 | 36,391,000 | 36,392,000 |
| 36,393,000 | 36,394,000 | 36,395,000 | 36,396,000 | 36,397,000 | 36,398,000 | 36,399,000 | 36,400,000 |
| 36,401,000 | 36,402,000 | 36,403,000 | 36,404,000 | 36,405,000 | 36,406,000 | 36,407,000 | 36,408,000 |
| 36,409,000 | 36,410,000 | 36,411,000 | 36,412,000 | 36,413,000 | 36,414,000 | 36,415,000 | 36,416,000 |
| 36,417,000 | 36,418,000 | 36,419,000 | 36,420,000 | 36,421,000 | 36,422,000 | 36,423,000 | 36,424,000 |
| 36,425,000 | 36,426,000 | 36,427,000 | 36,428,000 | 36,429,000 | 36,430,000 | 36,431,000 | 36,432,000 |

Supplemental Figure S8

|            |            |            |            |            |            |            |            |
|------------|------------|------------|------------|------------|------------|------------|------------|
| 36,433,000 | 36,434,000 | 36,435,000 | 36,436,000 | 36,437,000 | 36,438,000 | 36,439,000 | 36,440,000 |
| 36,441,000 | 36,442,000 | 36,443,000 | 36,444,000 | 36,445,000 | 36,446,000 | 36,447,000 | 36,448,000 |
| 36,449,000 | 36,450,000 | 36,451,000 | 36,452,000 | 36,453,000 | 36,454,000 | 36,455,000 | 36,456,000 |
| 36,457,000 | 36,458,000 | 36,459,000 | 36,460,000 | 36,461,000 | 36,462,000 | 36,463,000 | 36,464,000 |
| 36,465,000 | 36,466,000 | 36,467,000 | 36,468,000 | 36,469,000 | 36,470,000 | 36,471,000 | 36,472,000 |
| 36,473,000 | 36,474,000 | 36,475,000 | 36,476,000 | 36,477,000 | 36,478,000 | 36,479,000 | 36,480,000 |
| 36,481,000 | 36,482,000 | 36,483,000 | 36,484,000 | 36,485,000 | 36,486,000 | 36,487,000 | 36,488,000 |
| 36,489,000 | 36,490,000 | 36,491,000 | 36,492,000 | 36,493,000 | 36,494,000 | 36,495,000 | 36,496,000 |
| 36,497,000 | 36,498,000 | 36,499,000 | 36,500,000 | 36,501,000 | 36,502,000 | 36,503,000 | 36,504,000 |
| 36,505,000 | 36,506,000 | 36,507,000 | 36,508,000 | 36,509,000 | 36,510,000 | 36,511,000 | 36,512,000 |
| 36,513,000 | 36,514,000 | 36,515,000 | 36,516,000 | 36,517,000 | 36,518,000 | 36,519,000 | 36,520,000 |
| 36,521,000 | 36,522,000 | 36,523,000 | 36,524,000 | 36,525,000 | 36,526,000 | 36,527,000 | 36,528,000 |
| 36,529,000 | 36,530,000 | 36,531,000 | 36,532,000 | 36,533,000 | 36,534,000 | 36,535,000 | 36,536,000 |
| 36,537,000 | 36,538,000 | 36,539,000 | 36,540,000 | 36,541,000 | 36,542,000 | 36,543,000 | 36,544,000 |
| 36,545,000 | 36,546,000 | 36,547,000 | 36,548,000 | 36,549,000 | 36,550,000 | 36,551,000 | 36,552,000 |
| 36,553,000 | 36,554,000 | 36,555,000 | 36,556,000 | 36,557,000 | 36,558,000 | 36,559,000 | 36,560,000 |
| 36,561,000 | 36,562,000 | 36,563,000 | 36,564,000 | 36,565,000 | 36,566,000 | 36,567,000 | 36,568,000 |
| 36,569,000 | 36,570,000 | 36,571,000 | 36,572,000 | 36,573,000 | 36,574,000 | 36,575,000 | 36,576,000 |
| 36,577,000 | 36,578,000 | 36,579,000 | 36,580,000 | 36,581,000 | 36,582,000 | 36,583,000 | 36,584,000 |
| 36,585,000 | 36,586,000 | 36,587,000 | 36,588,000 | 36,589,000 | 36,590,000 | 36,591,000 | 36,592,000 |
| 36,593,000 | 36,594,000 | 36,595,000 | 36,596,000 | 36,597,000 | 36,598,000 | 36,599,000 | 36,600,000 |
| 36,601,000 | 36,602,000 | 36,603,000 | 36,604,000 | 36,605,000 | 36,606,000 | 36,607,000 | 36,608,000 |
| 36,609,000 | 36,610,000 | 36,611,000 | 36,612,000 | 36,613,000 | 36,614,000 | 36,615,000 | 36,616,000 |



Supplemental Figure S8

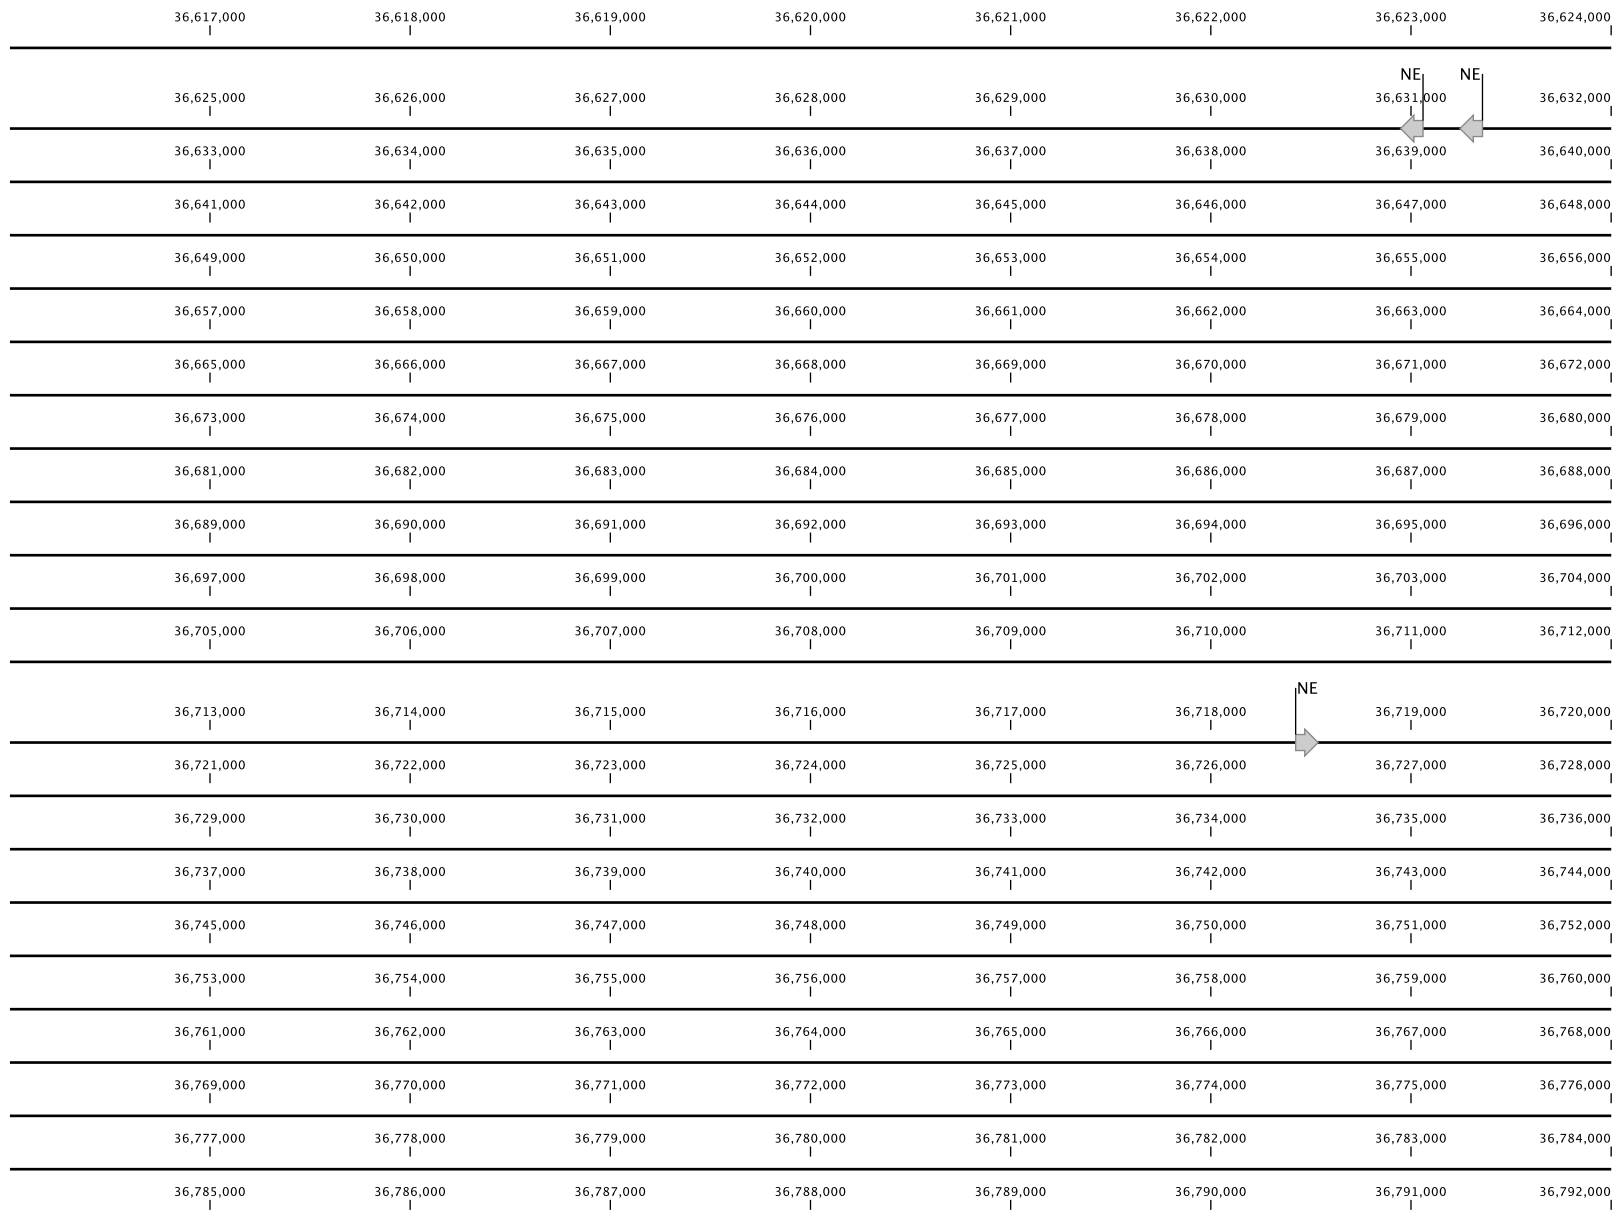

Supplemental Figure S8

|            |            |            |            |            |            |            |            |
|------------|------------|------------|------------|------------|------------|------------|------------|
| 36,793,000 | 36,794,000 | 36,795,000 | 36,796,000 | 36,797,000 | 36,798,000 | 36,799,000 | 36,800,000 |
| 36,801,000 | 36,802,000 | 36,803,000 | 36,804,000 | 36,805,000 | 36,806,000 | 36,807,000 | 36,808,000 |
| 36,809,000 | 36,810,000 | 36,811,000 | 36,812,000 | 36,813,000 | 36,814,000 | 36,815,000 | 36,816,000 |
| 36,817,000 | 36,818,000 | 36,819,000 | 36,820,000 | 36,821,000 | 36,822,000 | 36,823,000 | 36,824,000 |
| 36,825,000 | 36,826,000 | 36,827,000 | 36,828,000 | 36,829,000 | 36,830,000 | 36,831,000 | 36,832,000 |
| 36,833,000 | 36,834,000 | 36,835,000 | 36,836,000 | 36,837,000 | 36,838,000 | 36,839,000 | 36,840,000 |
| 36,841,000 | 36,842,000 | 36,843,000 | 36,844,000 | 36,845,000 | 36,846,000 | 36,847,000 | 36,848,000 |
| 36,849,000 | 36,850,000 | 36,851,000 | 36,852,000 | 36,853,000 | 36,854,000 | 36,855,000 | 36,856,000 |
| 36,857,000 | 36,858,000 | 36,859,000 | 36,860,000 | 36,861,000 | 36,862,000 | 36,863,000 | 36,864,000 |
| 36,865,000 | 36,866,000 | 36,867,000 | 36,868,000 | 36,869,000 | 36,870,000 | 36,871,000 | 36,872,000 |
| 36,873,000 | 36,874,000 | 36,875,000 | 36,876,000 | 36,877,000 | 36,878,000 | 36,879,000 | 36,880,000 |
| 36,881,000 | 36,882,000 | 36,883,000 | 36,884,000 | 36,885,000 | 36,886,000 | 36,887,000 | 36,888,000 |
| 36,889,000 | 36,890,000 | 36,891,000 | 36,892,000 | 36,893,000 | 36,894,000 | 36,895,000 | 36,896,000 |
| 36,897,000 | 36,898,000 | 36,899,000 | 36,900,000 | 36,901,000 | 36,902,000 | 36,903,000 | 36,904,000 |
| 36,905,000 | 36,906,000 | 36,907,000 | 36,908,000 | 36,909,000 | 36,910,000 | 36,911,000 | 36,912,000 |
| 36,913,000 | 36,914,000 | 36,915,000 | 36,916,000 | 36,917,000 | 36,918,000 | 36,919,000 | 36,920,000 |
| 36,921,000 | 36,922,000 | 36,923,000 | 36,924,000 | 36,925,000 | 36,926,000 | 36,927,000 | 36,928,000 |
| 36,929,000 | 36,930,000 | 36,931,000 | 36,932,000 | 36,933,000 | 36,934,000 | 36,935,000 | 36,936,000 |
| 36,937,000 | 36,938,000 | 36,939,000 | 36,940,000 | 36,941,000 | 36,942,000 | 36,943,000 | 36,944,000 |
| 36,945,000 | 36,946,000 | 36,947,000 | 36,948,000 | 36,949,000 | 36,950,000 | 36,951,000 | 36,952,000 |
| 36,953,000 | 36,954,000 | 36,955,000 | 36,956,000 | 36,957,000 | 36,958,000 | 36,959,000 | 36,960,000 |
| 36,961,000 | 36,962,000 | 36,963,000 | 36,964,000 | 36,965,000 | 36,966,000 | 36,967,000 | 36,968,000 |
| 36,969,000 | 36,970,000 | 36,971,000 | 36,972,000 | 36,973,000 | 36,974,000 | 36,975,000 | 36,976,000 |

Supplemental Figure S8

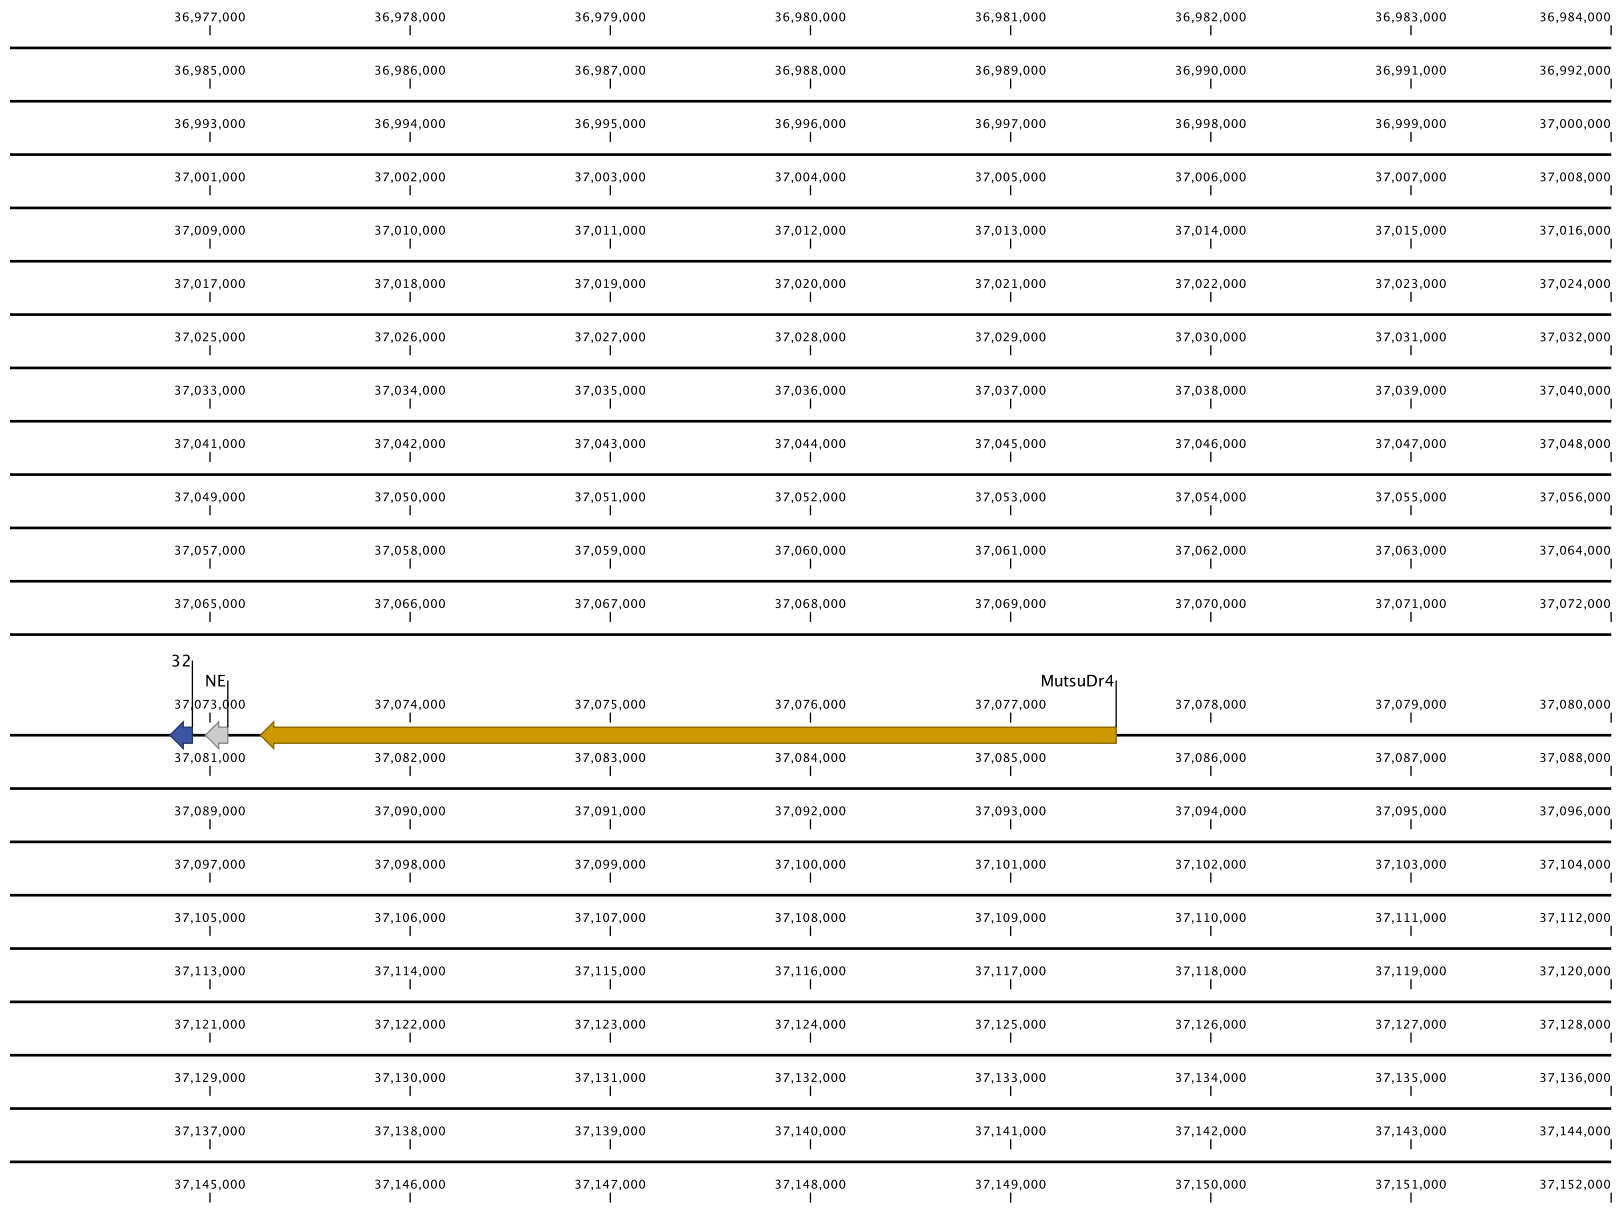

Supplemental Figure S8

|            |            |            |            |            |            |            |            |
|------------|------------|------------|------------|------------|------------|------------|------------|
| 37,153,000 | 37,154,000 | 37,155,000 | 37,156,000 | 37,157,000 | 37,158,000 | 37,159,000 | 37,160,000 |
| 37,161,000 | 37,162,000 | 37,163,000 | 37,164,000 | 37,165,000 | 37,166,000 | 37,167,000 | 37,168,000 |
| 37,169,000 | 37,170,000 | 37,171,000 | 37,172,000 | 37,173,000 | 37,174,000 | 37,175,000 | 37,176,000 |
| 37,177,000 | 37,178,000 | 37,179,000 | 37,180,000 | 37,181,000 | 37,182,000 | 37,183,000 | 37,184,000 |
| 37,185,000 | 37,186,000 | 37,187,000 | 37,188,000 | 37,189,000 | 37,190,000 | 37,191,000 | 37,192,000 |
| 37,193,000 | 37,194,000 | 37,195,000 | 37,196,000 | 37,197,000 | 37,198,000 | 37,199,000 | 37,200,000 |
| 37,201,000 | 37,202,000 | 37,203,000 | 37,204,000 | 37,205,000 | 37,206,000 | 37,207,000 | 37,208,000 |
| 37,209,000 | 37,210,000 | 37,211,000 | 37,212,000 | 37,213,000 | 37,214,000 | 37,215,000 | 37,216,000 |
| 37,217,000 | 37,218,000 | 37,219,000 | 37,220,000 | 37,221,000 | 37,222,000 | 37,223,000 | 37,224,000 |
| 37,225,000 | 37,226,000 | 37,227,000 | 37,228,000 | 37,229,000 | 37,230,000 | 37,231,000 | 37,232,000 |
| 37,233,000 | 37,234,000 | 37,235,000 | 37,236,000 | 37,237,000 | 37,238,000 | 37,239,000 | 37,240,000 |
| 37,241,000 | 37,242,000 | 37,243,000 | 37,244,000 | 37,245,000 | 37,246,000 | 37,247,000 | 37,248,000 |
| 37,249,000 | 37,250,000 | 37,251,000 | 37,252,000 | 37,253,000 | 37,254,000 | 37,255,000 | 37,256,000 |
| 37,257,000 | 37,258,000 | 37,259,000 | 37,260,000 | 37,261,000 | 37,262,000 | 37,263,000 | 37,264,000 |
| 37,265,000 | 37,266,000 | 37,267,000 | 37,268,000 | 37,269,000 | 37,270,000 | 37,271,000 | 37,272,000 |
| 37,273,000 | 37,274,000 | 37,275,000 | 37,276,000 | 37,277,000 | 37,278,000 | 37,279,000 | 37,280,000 |
| 37,281,000 | 37,282,000 | 37,283,000 | 37,284,000 | 37,285,000 | 37,286,000 | 37,287,000 | 37,288,000 |
| 37,289,000 | 37,290,000 | 37,291,000 | 37,292,000 | 37,293,000 | 37,294,000 | 37,295,000 | 37,296,000 |
| 37,297,000 | 37,298,000 | 37,299,000 | 37,300,000 | 37,301,000 | 37,302,000 | 37,303,000 | 37,304,000 |
| 37,305,000 | 37,306,000 | 37,307,000 | 37,308,000 | 37,309,000 | 37,310,000 | 37,311,000 | 37,312,000 |
| 37,313,000 | 37,314,000 | 37,315,000 | 37,316,000 | 37,317,000 | 37,318,000 | 37,319,000 | 37,320,000 |
| 37,321,000 | 37,322,000 | 37,323,000 | 37,324,000 | 37,325,000 | 37,326,000 | 37,327,000 | 37,328,000 |
| 37,329,000 | 37,330,000 | 37,331,000 | 37,332,000 | 37,333,000 | 37,334,000 | 37,335,000 | 37,336,000 |

NE

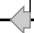

Supplemental Figure S8

|            |            |            |            |            |            |            |            |
|------------|------------|------------|------------|------------|------------|------------|------------|
| 37,337,000 | 37,338,000 | 37,339,000 | 37,340,000 | 37,341,000 | 37,342,000 | 37,343,000 | 37,344,000 |
| 37,345,000 | 37,346,000 | 37,347,000 | 37,348,000 | 37,349,000 | 37,350,000 | 37,351,000 | 37,352,000 |
| 37,353,000 | 37,354,000 | 37,355,000 | 37,356,000 | 37,357,000 | 37,358,000 | 37,359,000 | 37,360,000 |
| 37,361,000 | 37,362,000 | 37,363,000 | 37,364,000 | 37,365,000 | 37,366,000 | 37,367,000 | 37,368,000 |
| 37,369,000 | 37,370,000 | 37,371,000 | 37,372,000 | 37,373,000 | 37,374,000 | 37,375,000 | 37,376,000 |
| 37,377,000 | 37,378,000 | 37,379,000 | 37,380,000 | 37,381,000 | 37,382,000 | 37,383,000 | 37,384,000 |
| 37,385,000 | 37,386,000 | 37,387,000 | 37,388,000 | 37,389,000 | 37,390,000 | 37,391,000 | 37,392,000 |
| 37,393,000 | 37,394,000 | 37,395,000 | 37,396,000 | 37,397,000 | 37,398,000 | 37,399,000 | 37,400,000 |
| 37,401,000 | 37,402,000 | 37,403,000 | 37,404,000 | 37,405,000 | 37,406,000 | 37,407,000 | 37,408,000 |
| 37,409,000 | 37,410,000 | 37,411,000 | 37,412,000 | 37,413,000 | 37,414,000 | 37,415,000 | 37,416,000 |
| 37,417,000 | 37,418,000 | 37,419,000 | 37,420,000 | 37,421,000 | 37,422,000 | 37,423,000 | 37,424,000 |
| 37,425,000 | 37,426,000 | 37,427,000 | 37,428,000 | 37,429,000 | 37,430,000 | 37,431,000 | 37,432,000 |
| 37,433,000 | 37,434,000 | 37,435,000 | 37,436,000 | 37,437,000 | 37,438,000 | 37,439,000 | 37,440,000 |
| 37,441,000 | 37,442,000 | 37,443,000 | 37,444,000 | 37,445,000 | 37,446,000 | 37,447,000 | 37,448,000 |
| 37,449,000 | 37,450,000 | 37,451,000 | 37,452,000 | 37,453,000 | 37,454,000 | 37,455,000 | 37,456,000 |
| 37,457,000 | 37,458,000 | 37,459,000 | 37,460,000 | 37,461,000 | 37,462,000 | 37,463,000 | 37,464,000 |
| 37,465,000 | 37,466,000 | 37,467,000 | 37,468,000 | 37,469,000 | 37,470,000 | 37,471,000 | 37,472,000 |
| 37,473,000 | 37,474,000 | 37,475,000 | 37,476,000 | 37,477,000 | 37,478,000 | 37,479,000 | 37,480,000 |
| 37,481,000 | 37,482,000 | 37,483,000 | 37,484,000 | 37,485,000 | 37,486,000 | 37,487,000 | 37,488,000 |
| 37,489,000 | 37,490,000 | 37,491,000 | 37,492,000 | 37,493,000 | 37,494,000 | 37,495,000 | 37,496,000 |
| 37,497,000 | 37,498,000 | 37,499,000 | 37,500,000 | 37,501,000 | 37,502,000 | 37,503,000 | 37,504,000 |
| 37,505,000 | 37,506,000 | 37,507,000 | 37,508,000 | 37,509,000 | 37,510,000 | 37,511,000 | 37,512,000 |
| 37,513,000 | 37,514,000 | 37,515,000 | 37,516,000 | 37,517,000 | 37,518,000 | 37,519,000 | 37,520,000 |

Supplemental Figure S8

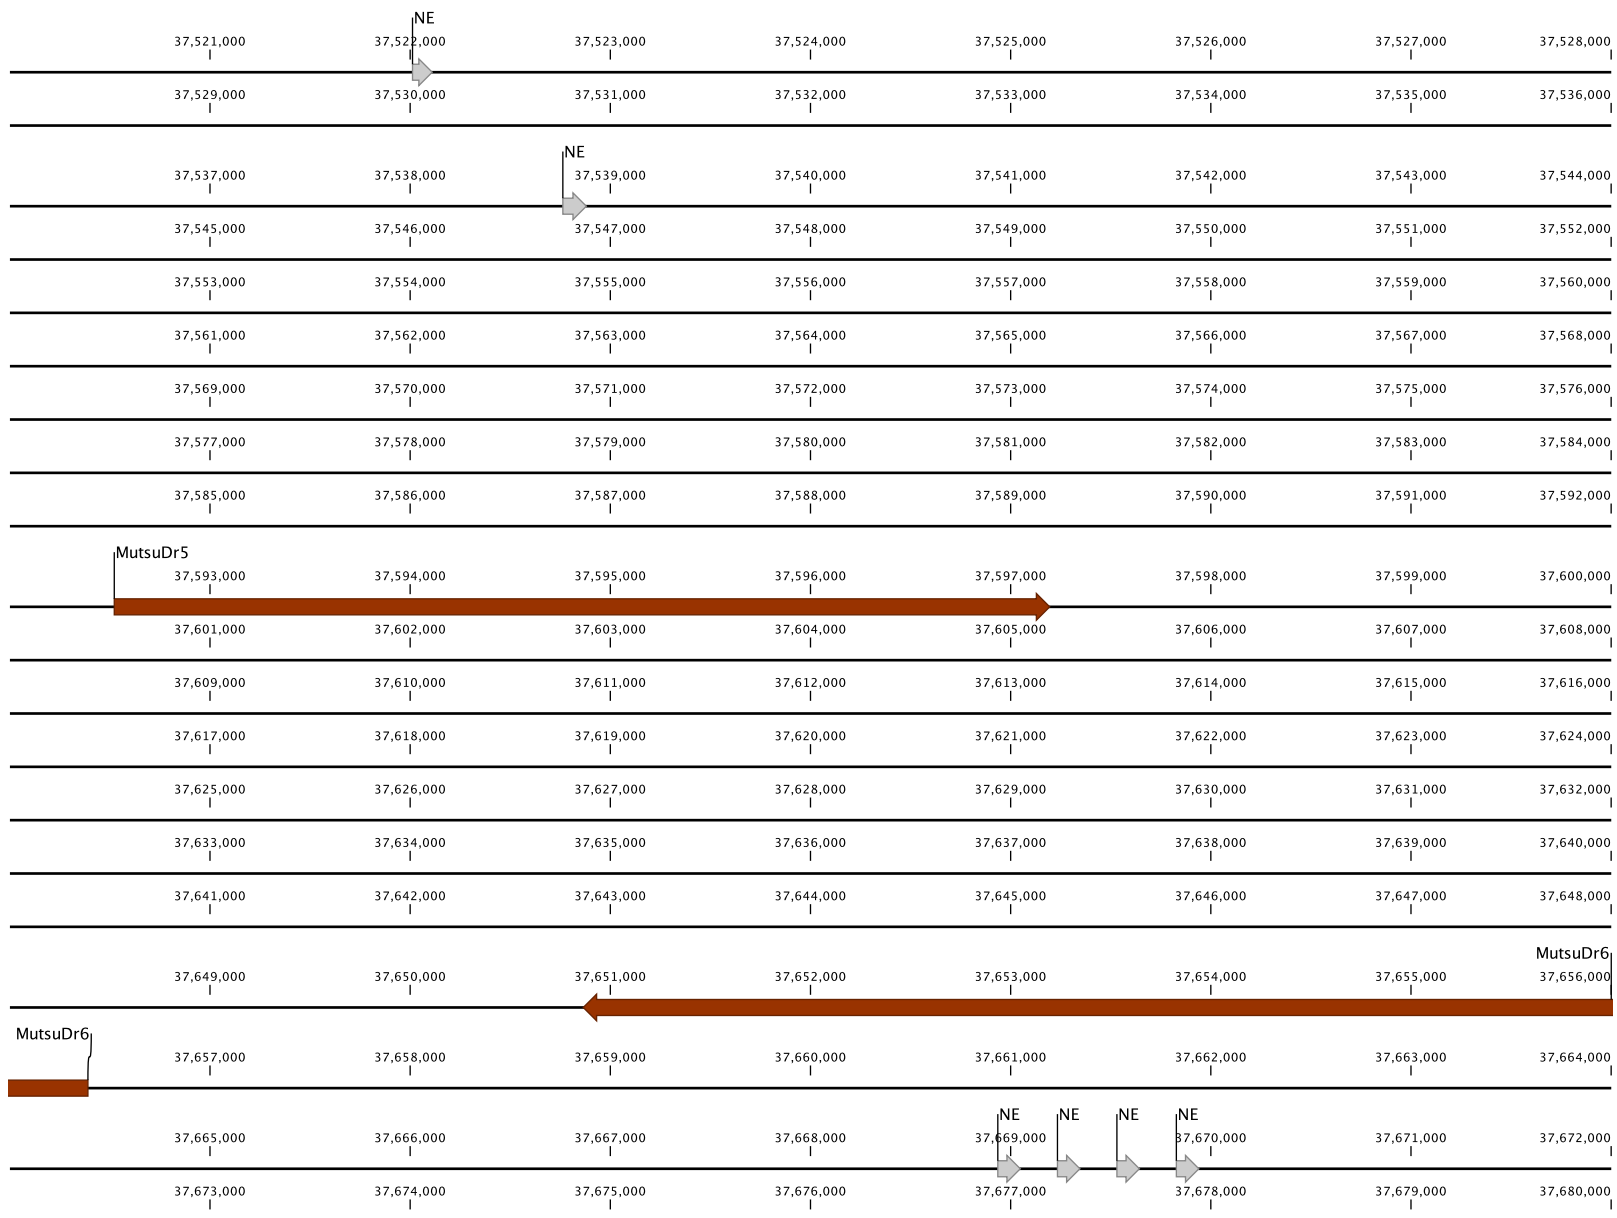

Supplemental Figure S8

|            |            |            |            |            |            |            |            |
|------------|------------|------------|------------|------------|------------|------------|------------|
| 37,681,000 | 37,682,000 | 37,683,000 | 37,684,000 | 37,685,000 | 37,686,000 | 37,687,000 | 37,688,000 |
| 37,689,000 | 37,690,000 | 37,691,000 | 37,692,000 | 37,693,000 | 37,694,000 | 37,695,000 | 37,696,000 |
| 37,697,000 | 37,698,000 | 37,699,000 | 37,700,000 | 37,701,000 | 37,702,000 | 37,703,000 | 37,704,000 |
| 37,705,000 | 37,706,000 | 37,707,000 | 37,708,000 | 37,709,000 | 37,710,000 | 37,711,000 | 37,712,000 |
| 37,713,000 | 37,714,000 | 37,715,000 | 37,716,000 | 37,717,000 | 37,718,000 | 37,719,000 | 37,720,000 |
| 37,721,000 | 37,722,000 | 37,723,000 | 37,724,000 | 37,725,000 | 37,726,000 | 37,727,000 | 37,728,000 |
| 37,729,000 | 37,730,000 | 37,731,000 | 37,732,000 | 37,733,000 | 37,734,000 | 37,735,000 | 37,736,000 |
| 37,737,000 | 37,738,000 | 37,739,000 | 37,740,000 | 37,741,000 | 37,742,000 | 37,743,000 | 37,744,000 |
| 37,745,000 | 37,746,000 | 37,747,000 | 37,748,000 | 37,749,000 | 37,750,000 | 37,751,000 | 37,752,000 |
| 37,753,000 | 37,754,000 | 37,755,000 | 37,756,000 | 37,757,000 | 37,758,000 | 37,759,000 | 37,760,000 |
| 37,761,000 | 37,762,000 | 37,763,000 | 37,764,000 | 37,765,000 | 37,766,000 | 37,767,000 | 37,768,000 |
| 37,769,000 | 37,770,000 | 37,771,000 | 37,772,000 | 37,773,000 | 37,774,000 | 37,775,000 | 37,776,000 |
| 37,777,000 | 37,778,000 | 37,779,000 | 37,780,000 | 37,781,000 | 37,782,000 | 37,783,000 | 37,784,000 |
| 37,785,000 | 37,786,000 | 37,787,000 | 37,788,000 | 37,789,000 | 37,790,000 | 37,791,000 | 37,792,000 |
| 37,793,000 | 37,794,000 | 37,795,000 | 37,796,000 | 37,797,000 | 37,798,000 | 37,799,000 | 37,800,000 |
| 37,801,000 | 37,802,000 | 37,803,000 | 37,804,000 | 37,805,000 | 37,806,000 | 37,807,000 | 37,808,000 |
| 37,809,000 | 37,810,000 | 37,811,000 | 37,812,000 | 37,813,000 | 37,814,000 | 37,815,000 | 37,816,000 |
| 37,817,000 | 37,818,000 | 37,819,000 | 37,820,000 | 37,821,000 | 37,822,000 | 37,823,000 | 37,824,000 |
| 37,825,000 | 37,826,000 | 37,827,000 | 37,828,000 | 37,829,000 | 37,830,000 | 37,831,000 | 37,832,000 |
| 37,833,000 | 37,834,000 | 37,835,000 | 37,836,000 | 37,837,000 | 37,838,000 | 37,839,000 | 37,840,000 |
| 37,841,000 | 37,842,000 | 37,843,000 | 37,844,000 | 37,845,000 | 37,846,000 | 37,847,000 | 37,848,000 |
| 37,849,000 | 37,850,000 | 37,851,000 | 37,852,000 | 37,853,000 | 37,854,000 | 37,855,000 | 37,856,000 |
| 37,857,000 | 37,858,000 | 37,859,000 | 37,860,000 | 37,861,000 | 37,862,000 | 37,863,000 | 37,864,000 |

Supplemental Figure S8

|            |            |            |            |            |            |            |            |
|------------|------------|------------|------------|------------|------------|------------|------------|
| 37,865,000 | 37,866,000 | 37,867,000 | 37,868,000 | 37,869,000 | 37,870,000 | 37,871,000 | 37,872,000 |
| 37,873,000 | 37,874,000 | 37,875,000 | 37,876,000 | 37,877,000 | 37,878,000 | 37,879,000 | 37,880,000 |
| 37,881,000 | 37,882,000 | 37,883,000 | 37,884,000 | 37,885,000 | 37,886,000 | 37,887,000 | 37,888,000 |
| 37,889,000 | 37,890,000 | 37,891,000 | 37,892,000 | 37,893,000 | 37,894,000 | 37,895,000 | 37,896,000 |
| 37,897,000 | 37,898,000 | 37,899,000 | 37,900,000 | 37,901,000 | 37,902,000 | 37,903,000 | 37,904,000 |
| 37,905,000 | 37,906,000 | 37,907,000 | 37,908,000 | 37,909,000 | 37,910,000 | 37,911,000 | 37,912,000 |
| 37,913,000 | 37,914,000 | 37,915,000 | 37,916,000 | 37,917,000 | 37,918,000 | 37,919,000 | 37,920,000 |
| 37,921,000 | 37,922,000 | 37,923,000 | 37,924,000 | 37,925,000 | 37,926,000 | 37,927,000 | 37,928,000 |
| 37,929,000 | 37,930,000 | 37,931,000 | 37,932,000 | 37,933,000 | 37,934,000 | 37,935,000 | 37,936,000 |
| 37,937,000 | 37,938,000 | 37,939,000 | 37,940,000 | 37,941,000 | 37,942,000 | 37,943,000 | 37,944,000 |
| 37,945,000 | 37,946,000 | 37,947,000 | 37,948,000 | 37,949,000 | 37,950,000 | 37,951,000 | 37,952,000 |
| 37,953,000 | 37,954,000 | 37,955,000 | 37,956,000 | 37,957,000 | 37,958,000 | 37,959,000 | 37,960,000 |
| 37,961,000 | 37,962,000 | 37,963,000 | 37,964,000 | 37,965,000 | 37,966,000 | 37,967,000 | 37,968,000 |
| 37,969,000 | 37,970,000 | 37,971,000 | 37,972,000 | 37,973,000 | 37,974,000 | 37,975,000 | 37,976,000 |
| 37,977,000 | 37,978,000 | 37,979,000 | 37,980,000 | 37,981,000 | 37,982,000 | 37,983,000 | 37,984,000 |
| 37,985,000 | 37,986,000 | 37,987,000 | 37,988,000 | 37,989,000 | 37,990,000 | 37,991,000 | 37,992,000 |
| 37,993,000 | 37,994,000 | 37,995,000 | 37,996,000 | 37,997,000 | 37,998,000 | 37,999,000 | 38,000,000 |
| 38,001,000 | 38,002,000 | 38,003,000 | 38,004,000 | 38,005,000 | 38,006,000 | 38,007,000 | 38,008,000 |
| 38,009,000 | 38,010,000 | 38,011,000 | 38,012,000 | 38,013,000 | 38,014,000 | 38,015,000 | 38,016,000 |
| 38,017,000 | 38,018,000 | 38,019,000 | 38,020,000 | 38,021,000 | 38,022,000 | 38,023,000 | 38,024,000 |
| 38,025,000 | 38,026,000 | 38,027,000 | 38,028,000 | 38,029,000 | 38,030,000 | 38,031,000 | 38,032,000 |
| 38,033,000 | 38,034,000 | 38,035,000 | 38,036,000 | 38,037,000 | 38,038,000 | 38,039,000 | 38,040,000 |
| 38,041,000 | 38,042,000 | 38,043,000 | 38,044,000 | 38,045,000 | 38,046,000 | 38,047,000 | 38,048,000 |



Supplemental Figure S8

|            |            |            |            |            |            |            |            |
|------------|------------|------------|------------|------------|------------|------------|------------|
| 38,049,000 | 38,050,000 | 38,051,000 | 38,052,000 | 38,053,000 | 38,054,000 | 38,055,000 | 38,056,000 |
| 38,057,000 | 38,058,000 | 38,059,000 | 38,060,000 | 38,061,000 | 38,062,000 | 38,063,000 | 38,064,000 |
| 38,065,000 | 38,066,000 | 38,067,000 | 38,068,000 | 38,069,000 | 38,070,000 | 38,071,000 | 38,072,000 |
| 38,073,000 | 38,074,000 | 38,075,000 | 38,076,000 | 38,077,000 | 38,078,000 | 38,079,000 | 38,080,000 |
| 38,081,000 | 38,082,000 | 38,083,000 | 38,084,000 | 38,085,000 | 38,086,000 | 38,087,000 | 38,088,000 |
| 38,089,000 | 38,090,000 | 38,091,000 | 38,092,000 | 38,093,000 | 38,094,000 | 38,095,000 | 38,096,000 |
| 38,097,000 | 38,098,000 | 38,099,000 | 38,100,000 | 38,101,000 | 38,102,000 | 38,103,000 | 38,104,000 |
| 38,105,000 | 38,106,000 | 38,107,000 | 38,108,000 | 38,109,000 | 38,110,000 | 38,111,000 | 38,112,000 |
| 38,113,000 | 38,114,000 | 38,115,000 | 38,116,000 | 38,117,000 | 38,118,000 | 38,119,000 | 38,120,000 |
| 38,121,000 | 38,122,000 | 38,123,000 | 38,124,000 | 38,125,000 | 38,126,000 | 38,127,000 | 38,128,000 |
| 38,129,000 | 38,130,000 | 38,131,000 | 38,132,000 | 38,133,000 | 38,134,000 | 38,135,000 | 38,136,000 |
| 38,137,000 | 38,138,000 | 38,139,000 | 38,140,000 | 38,141,000 | 38,142,000 | 38,143,000 | 38,144,000 |
| 38,145,000 | 38,146,000 | 38,147,000 | 38,148,000 | 38,149,000 | 38,150,000 | 38,151,000 | 38,152,000 |
| 38,153,000 | 38,154,000 | 38,155,000 | 38,156,000 | 38,157,000 | 38,158,000 | 38,159,000 | 38,160,000 |
| 38,161,000 | 38,162,000 | 38,163,000 | 38,164,000 | 38,165,000 | 38,166,000 | 38,167,000 | 38,168,000 |
| 38,169,000 | 38,170,000 | 38,171,000 | 38,172,000 | 38,173,000 | 38,174,000 | 38,175,000 | 38,176,000 |
| 38,177,000 | 38,178,000 | 38,179,000 | 38,180,000 | 38,181,000 | 38,182,000 | 38,183,000 | 38,184,000 |
| 38,185,000 | 38,186,000 | 38,187,000 | 38,188,000 | 38,189,000 | 38,190,000 | 38,191,000 | 38,192,000 |
| 38,193,000 | 38,194,000 | 38,195,000 | 38,196,000 | 38,197,000 | 38,198,000 | 38,199,000 | 38,200,000 |
| 38,201,000 | 38,202,000 | 38,203,000 | 38,204,000 | 38,205,000 | 38,206,000 | 38,207,000 | 38,208,000 |
| 38,209,000 | 38,210,000 | 38,211,000 | 38,212,000 | 38,213,000 | 38,214,000 | 38,215,000 | 38,216,000 |
| 38,217,000 | 38,218,000 | 38,219,000 | 38,220,000 | 38,221,000 | 38,222,000 | 38,223,000 | 38,224,000 |
| 38,225,000 | 38,226,000 | 38,227,000 | 38,228,000 | 38,229,000 | 38,230,000 | 38,231,000 | 38,232,000 |

Supplemental Figure S8

|            |            |            |            |            |            |            |            |
|------------|------------|------------|------------|------------|------------|------------|------------|
| 38,233,000 | 38,234,000 | 38,235,000 | 38,236,000 | 38,237,000 | 38,238,000 | 38,239,000 | 38,240,000 |
| 38,241,000 | 38,242,000 | 38,243,000 | 38,244,000 | 38,245,000 | 38,246,000 | 38,247,000 | 38,248,000 |
| 38,249,000 | 38,250,000 | 38,251,000 | 38,252,000 | 38,253,000 | 38,254,000 | 38,255,000 | 38,256,000 |
| 38,257,000 | 38,258,000 | 38,259,000 | 38,260,000 | 38,261,000 | 38,262,000 | 38,263,000 | 38,264,000 |
| 38,265,000 | 38,266,000 | 38,267,000 | 38,268,000 | 38,269,000 | 38,270,000 | 38,271,000 | 38,272,000 |
| 38,273,000 | 38,274,000 | 38,275,000 | 38,276,000 | 38,277,000 | 38,278,000 | 38,279,000 | 38,280,000 |
| 38,281,000 | 38,282,000 | 38,283,000 | 38,284,000 | 38,285,000 | 38,286,000 | 38,287,000 | 38,288,000 |
| 38,289,000 | 38,290,000 | 38,291,000 | 38,292,000 | 38,293,000 | 38,294,000 | 38,295,000 | 38,296,000 |
| 38,297,000 | 38,298,000 | 38,299,000 | 38,300,000 | 38,301,000 | 38,302,000 | 38,303,000 | 38,304,000 |
| 38,305,000 | 38,306,000 | 38,307,000 | 38,308,000 | 38,309,000 | 38,310,000 | 38,311,000 | 38,312,000 |
| 38,313,000 | 38,314,000 | 38,315,000 | 38,316,000 | 38,317,000 | 38,318,000 | 38,319,000 | 38,320,000 |
| 38,321,000 | 38,322,000 | 38,323,000 | 38,324,000 | 38,325,000 | 38,326,000 | 38,327,000 | 38,328,000 |
| 38,329,000 | 38,330,000 | 38,331,000 | 38,332,000 | 38,333,000 | 38,334,000 | 38,335,000 | 38,336,000 |
| 38,337,000 | 38,338,000 | 38,339,000 | 38,340,000 | 38,341,000 | 38,342,000 | 38,343,000 | 38,344,000 |
| 38,345,000 | 38,346,000 | 38,347,000 | 38,348,000 | 38,349,000 | 38,350,000 | 38,351,000 | 38,352,000 |
| 38,353,000 | 38,354,000 | 38,355,000 | 38,356,000 | 38,357,000 | 38,358,000 | 38,359,000 | 38,360,000 |
| 38,361,000 | 38,362,000 | 38,363,000 | 38,364,000 | 38,365,000 | 38,366,000 | 38,367,000 | 38,368,000 |
| 38,369,000 | 38,370,000 | 38,371,000 | 38,372,000 | 38,373,000 | 38,374,000 | 38,375,000 | 38,376,000 |
| 38,377,000 | 38,378,000 | 38,379,000 | 38,380,000 | 38,381,000 | 38,382,000 | 38,383,000 | 38,384,000 |
| 38,385,000 | 38,386,000 | 38,387,000 | 38,388,000 | 38,389,000 | 38,390,000 | 38,391,000 | 38,392,000 |
| 38,393,000 | 38,394,000 | 38,395,000 | 38,396,000 | 38,397,000 | 38,398,000 | 38,399,000 | 38,400,000 |
| 38,401,000 | 38,402,000 | 38,403,000 | 38,404,000 | 38,405,000 | 38,406,000 | 38,407,000 | 38,408,000 |
| 38,409,000 | 38,410,000 | 38,411,000 | 38,412,000 | 38,413,000 | 38,414,000 | 38,415,000 | 38,416,000 |

NE

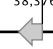

Supplemental Figure S8

|            |            |            |            |            |            |            |            |
|------------|------------|------------|------------|------------|------------|------------|------------|
| 38,417,000 | 38,418,000 | 38,419,000 | 38,420,000 | 38,421,000 | 38,422,000 | 38,423,000 | 38,424,000 |
| 38,425,000 | 38,426,000 | 38,427,000 | 38,428,000 | 38,429,000 | 38,430,000 | 38,431,000 | 38,432,000 |
| 38,433,000 | 38,434,000 | 38,435,000 | 38,436,000 | 38,437,000 | 38,438,000 | 38,439,000 | 38,440,000 |
| 38,441,000 | 38,442,000 | 38,443,000 | 38,444,000 | 38,445,000 | 38,446,000 | 38,447,000 | 38,448,000 |
| 38,449,000 | 38,450,000 | 38,451,000 | 38,452,000 | 38,453,000 | 38,454,000 | 38,455,000 | 38,456,000 |
| 38,457,000 | 38,458,000 | 38,459,000 | 38,460,000 | 38,461,000 | 38,462,000 | 38,463,000 | 38,464,000 |
| 38,465,000 | 38,466,000 | 38,467,000 | 38,468,000 | 38,469,000 | 38,470,000 | 38,471,000 | 38,472,000 |
| 38,473,000 | 38,474,000 | 38,475,000 | 38,476,000 | 38,477,000 | 38,478,000 | 38,479,000 | 38,480,000 |
| 38,481,000 | 38,482,000 | 38,483,000 | 38,484,000 | 38,485,000 | 38,486,000 | 38,487,000 | 38,488,000 |
| 38,489,000 | 38,490,000 | 38,491,000 | 38,492,000 | 38,493,000 | 38,494,000 | 38,495,000 | 38,496,000 |
| 38,497,000 | 38,498,000 | 38,499,000 | 38,500,000 | 38,501,000 | 38,502,000 | 38,503,000 | 38,504,000 |
| 38,505,000 | 38,506,000 | 38,507,000 | 38,508,000 | 38,509,000 | 38,510,000 | 38,511,000 | 38,512,000 |
| 38,513,000 | 38,514,000 | 38,515,000 | 38,516,000 | 38,517,000 | 38,518,000 | 38,519,000 | 38,520,000 |
| 38,521,000 | 38,522,000 | 38,523,000 | 38,524,000 | 38,525,000 | 38,526,000 | 38,527,000 | 38,528,000 |
| 38,529,000 | 38,530,000 | 38,531,000 | 38,532,000 | 38,533,000 | 38,534,000 | 38,535,000 | 38,536,000 |
| 38,537,000 | 38,538,000 | 38,539,000 | 38,540,000 | 38,541,000 | 38,542,000 | 38,543,000 | 38,544,000 |
| 38,545,000 | 38,546,000 | 38,547,000 | 38,548,000 | 38,549,000 | 38,550,000 | 38,551,000 | 38,552,000 |
| 38,553,000 | 38,554,000 | 38,555,000 | 38,556,000 | 38,557,000 | 38,558,000 | 38,559,000 | 38,560,000 |
| 38,561,000 | 38,562,000 | 38,563,000 | 38,564,000 | 38,565,000 | 38,566,000 | 38,567,000 | 38,568,000 |
| 38,569,000 | 38,570,000 | 38,571,000 | 38,572,000 | 38,573,000 | 38,574,000 | 38,575,000 | 38,576,000 |
| 38,577,000 | 38,578,000 | 38,579,000 | 38,580,000 | 38,581,000 | 38,582,000 | 38,583,000 | 38,584,000 |
| 38,585,000 | 38,586,000 | 38,587,000 | 38,588,000 | 38,589,000 | 38,590,000 | 38,591,000 | 38,592,000 |
| 38,593,000 | 38,594,000 | 38,595,000 | 38,596,000 | 38,597,000 | 38,598,000 | 38,599,000 | 38,600,000 |

Supplemental Figure S8

|            |            |            |            |            |            |            |            |
|------------|------------|------------|------------|------------|------------|------------|------------|
| 38,601,000 | 38,602,000 | 38,603,000 | 38,604,000 | 38,605,000 | 38,606,000 | 38,607,000 | 38,608,000 |
| 38,609,000 | 38,610,000 | 38,611,000 | 38,612,000 | 38,613,000 | 38,614,000 | 38,615,000 | 38,616,000 |
| 38,617,000 | 38,618,000 | 38,619,000 | 38,620,000 | 38,621,000 | 38,622,000 | 38,623,000 | 38,624,000 |
| 38,625,000 | 38,626,000 | 38,627,000 | 38,628,000 | 38,629,000 | 38,630,000 | 38,631,000 | 38,632,000 |
| 38,633,000 | 38,634,000 | 38,635,000 | 38,636,000 | 38,637,000 | 38,638,000 | 38,639,000 | 38,640,000 |
| 38,641,000 | 38,642,000 | 38,643,000 | 38,644,000 | 38,645,000 | 38,646,000 | 38,647,000 | 38,648,000 |
| 38,649,000 | 38,650,000 | 38,651,000 | 38,652,000 | 38,653,000 | 38,654,000 | 38,655,000 | 38,656,000 |
| 38,657,000 | 38,658,000 | 38,659,000 | 38,660,000 | 38,661,000 | 38,662,000 | 38,663,000 | 38,664,000 |
| 38,665,000 | 38,666,000 | 38,667,000 | 38,668,000 | 38,669,000 | 38,670,000 | 38,671,000 | 38,672,000 |
| 38,673,000 | 38,674,000 | 38,675,000 | 38,676,000 | 38,677,000 | 38,678,000 | 38,679,000 | 38,680,000 |
| 38,681,000 | 38,682,000 | 38,683,000 | 38,684,000 | 38,685,000 | 38,686,000 | 38,687,000 | 38,688,000 |
| 38,689,000 | 38,690,000 | 38,691,000 | 38,692,000 | 38,693,000 | 38,694,000 | 38,695,000 | 38,696,000 |
| 38,697,000 | 38,698,000 | 38,699,000 | 38,700,000 | 38,701,000 | 38,702,000 | 38,703,000 | 38,704,000 |
| 38,705,000 | 38,706,000 | 38,707,000 | 38,708,000 | 38,709,000 | 38,710,000 | 38,711,000 | 38,712,000 |
| 38,713,000 | 38,714,000 | 38,715,000 | 38,716,000 | 38,717,000 | 38,718,000 | 38,719,000 | 38,720,000 |
| 38,721,000 | 38,722,000 | 38,723,000 | 38,724,000 | 38,725,000 | 38,726,000 | 38,727,000 | 38,728,000 |
| 38,729,000 | 38,730,000 | 38,731,000 | 38,732,000 | 38,733,000 | 38,734,000 | 38,735,000 | 38,736,000 |
| 38,737,000 | 38,738,000 | 38,739,000 | 38,740,000 | 38,741,000 | 38,742,000 | 38,743,000 | 38,744,000 |
| 38,745,000 | 38,746,000 | 38,747,000 | 38,748,000 | 38,749,000 | 38,750,000 | 38,751,000 | 38,752,000 |
| 38,753,000 | 38,754,000 | 38,755,000 | 38,756,000 | 38,757,000 | 38,758,000 | 38,759,000 | 38,760,000 |
| 38,761,000 | 38,762,000 | 38,763,000 | 38,764,000 | 38,765,000 | 38,766,000 | 38,767,000 | 38,768,000 |
| 38,769,000 | 38,770,000 | 38,771,000 | 38,772,000 | 38,773,000 | 38,774,000 | 38,775,000 | 38,776,000 |
| 38,777,000 | 38,778,000 | 38,779,000 | 38,780,000 | 38,781,000 | 38,782,000 | 38,783,000 | 38,784,000 |

NE

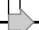

Supplemental Figure S8

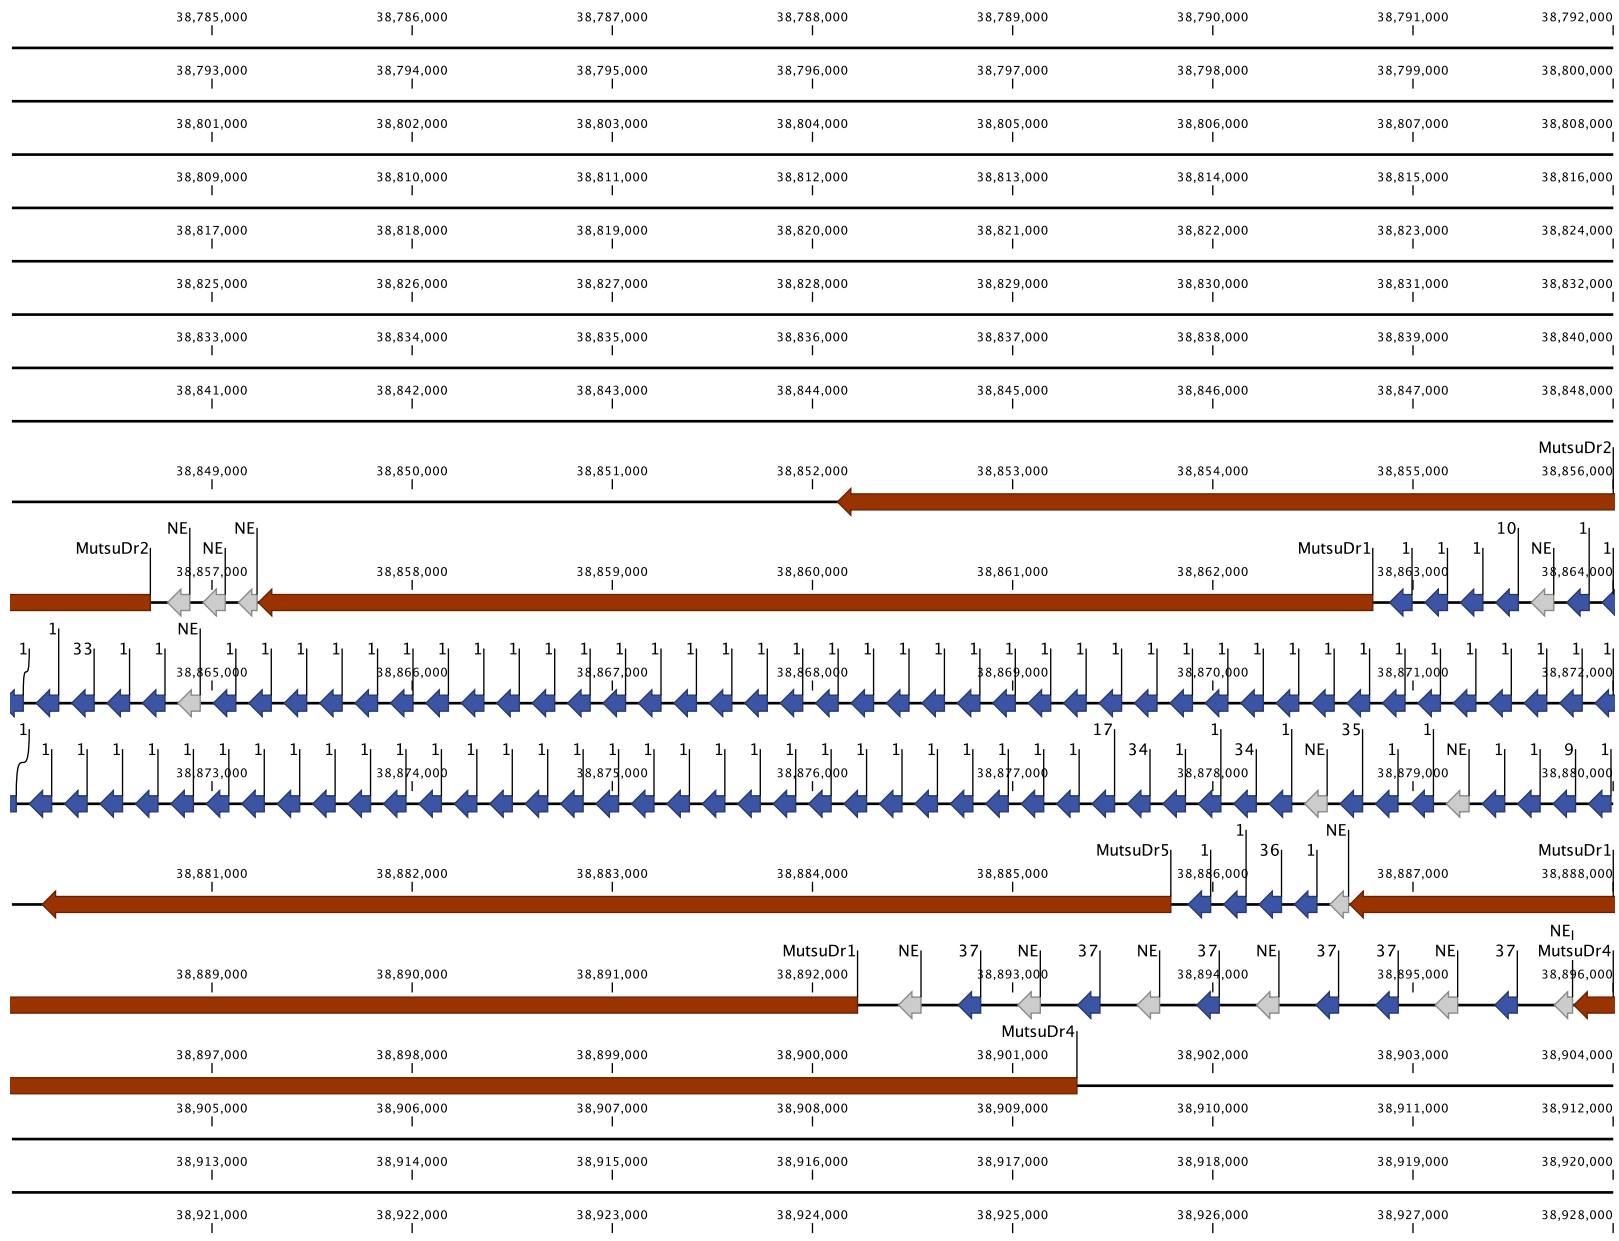

Supplemental Figure S8

|            |            |            |            |            |            |            |            |
|------------|------------|------------|------------|------------|------------|------------|------------|
| 38,929,000 | 38,930,000 | 38,931,000 | 38,932,000 | 38,933,000 | 38,934,000 | 38,935,000 | 38,936,000 |
| 38,937,000 | 38,938,000 | 38,939,000 | 38,940,000 | 38,941,000 | 38,942,000 | 38,943,000 | 38,944,000 |
| 38,945,000 | 38,946,000 | 38,947,000 | 38,948,000 | 38,949,000 | 38,950,000 | 38,951,000 | 38,952,000 |
| 38,953,000 | 38,954,000 | 38,955,000 | 38,956,000 | 38,957,000 | 38,958,000 | 38,959,000 | 38,960,000 |
| 38,961,000 | 38,962,000 | 38,963,000 | 38,964,000 | 38,965,000 | 38,966,000 | 38,967,000 | 38,968,000 |
| 38,969,000 | 38,970,000 | 38,971,000 | 38,972,000 | 38,973,000 | 38,974,000 | 38,975,000 | 38,976,000 |
| 38,977,000 | 38,978,000 | 38,979,000 | 38,980,000 | 38,981,000 | 38,982,000 | 38,983,000 | 38,984,000 |
| 38,985,000 | 38,986,000 | 38,987,000 | 38,988,000 | 38,989,000 | 38,990,000 | 38,991,000 | 38,992,000 |
| 38,993,000 | 38,994,000 | 38,995,000 | 38,996,000 | 38,997,000 | 38,998,000 | 38,999,000 | 39,000,000 |
| 39,001,000 | 39,002,000 | 39,003,000 | 39,004,000 | 39,005,000 | 39,006,000 | 39,007,000 | 39,008,000 |
| 39,009,000 | 39,010,000 | 39,011,000 | 39,012,000 | 39,013,000 | 39,014,000 | 39,015,000 | 39,016,000 |
| 39,017,000 | 39,018,000 | 39,019,000 | 39,020,000 | 39,021,000 | 39,022,000 | 39,023,000 | 39,024,000 |
| 39,025,000 | 39,026,000 | 39,027,000 | 39,028,000 | 39,029,000 | 39,030,000 | 39,031,000 | 39,032,000 |
| 39,033,000 | 39,034,000 | 39,035,000 | 39,036,000 | 39,037,000 | 39,038,000 | 39,039,000 | 39,040,000 |
| 39,041,000 | 39,042,000 | 39,043,000 | 39,044,000 | 39,045,000 | 39,046,000 | 39,047,000 | 39,048,000 |
| 39,049,000 | 39,050,000 | 39,051,000 | 39,052,000 | 39,053,000 | 39,054,000 | 39,055,000 | 39,056,000 |
| 39,057,000 | 39,058,000 | 39,059,000 | 39,060,000 | 39,061,000 | 39,062,000 | 39,063,000 | 39,064,000 |
| 39,065,000 | 39,066,000 | 39,067,000 | 39,068,000 | 39,069,000 | 39,070,000 | 39,071,000 | 39,072,000 |
| 39,073,000 | 39,074,000 | 39,075,000 | 39,076,000 | 39,077,000 | 39,078,000 | 39,079,000 | 39,080,000 |
| 39,081,000 | 39,082,000 | 39,083,000 | 39,084,000 | 39,085,000 | 39,086,000 | 39,087,000 | 39,088,000 |
| 39,089,000 | 39,090,000 | 39,091,000 | 39,092,000 | 39,093,000 | 39,094,000 | 39,095,000 | 39,096,000 |
| 39,097,000 | 39,098,000 | 39,099,000 | 39,100,000 | 39,101,000 | 39,102,000 | 39,103,000 | 39,104,000 |
| 39,105,000 | 39,106,000 | 39,107,000 | 39,108,000 | 39,109,000 | 39,110,000 | 39,111,000 | 39,112,000 |

Supplemental Figure S8

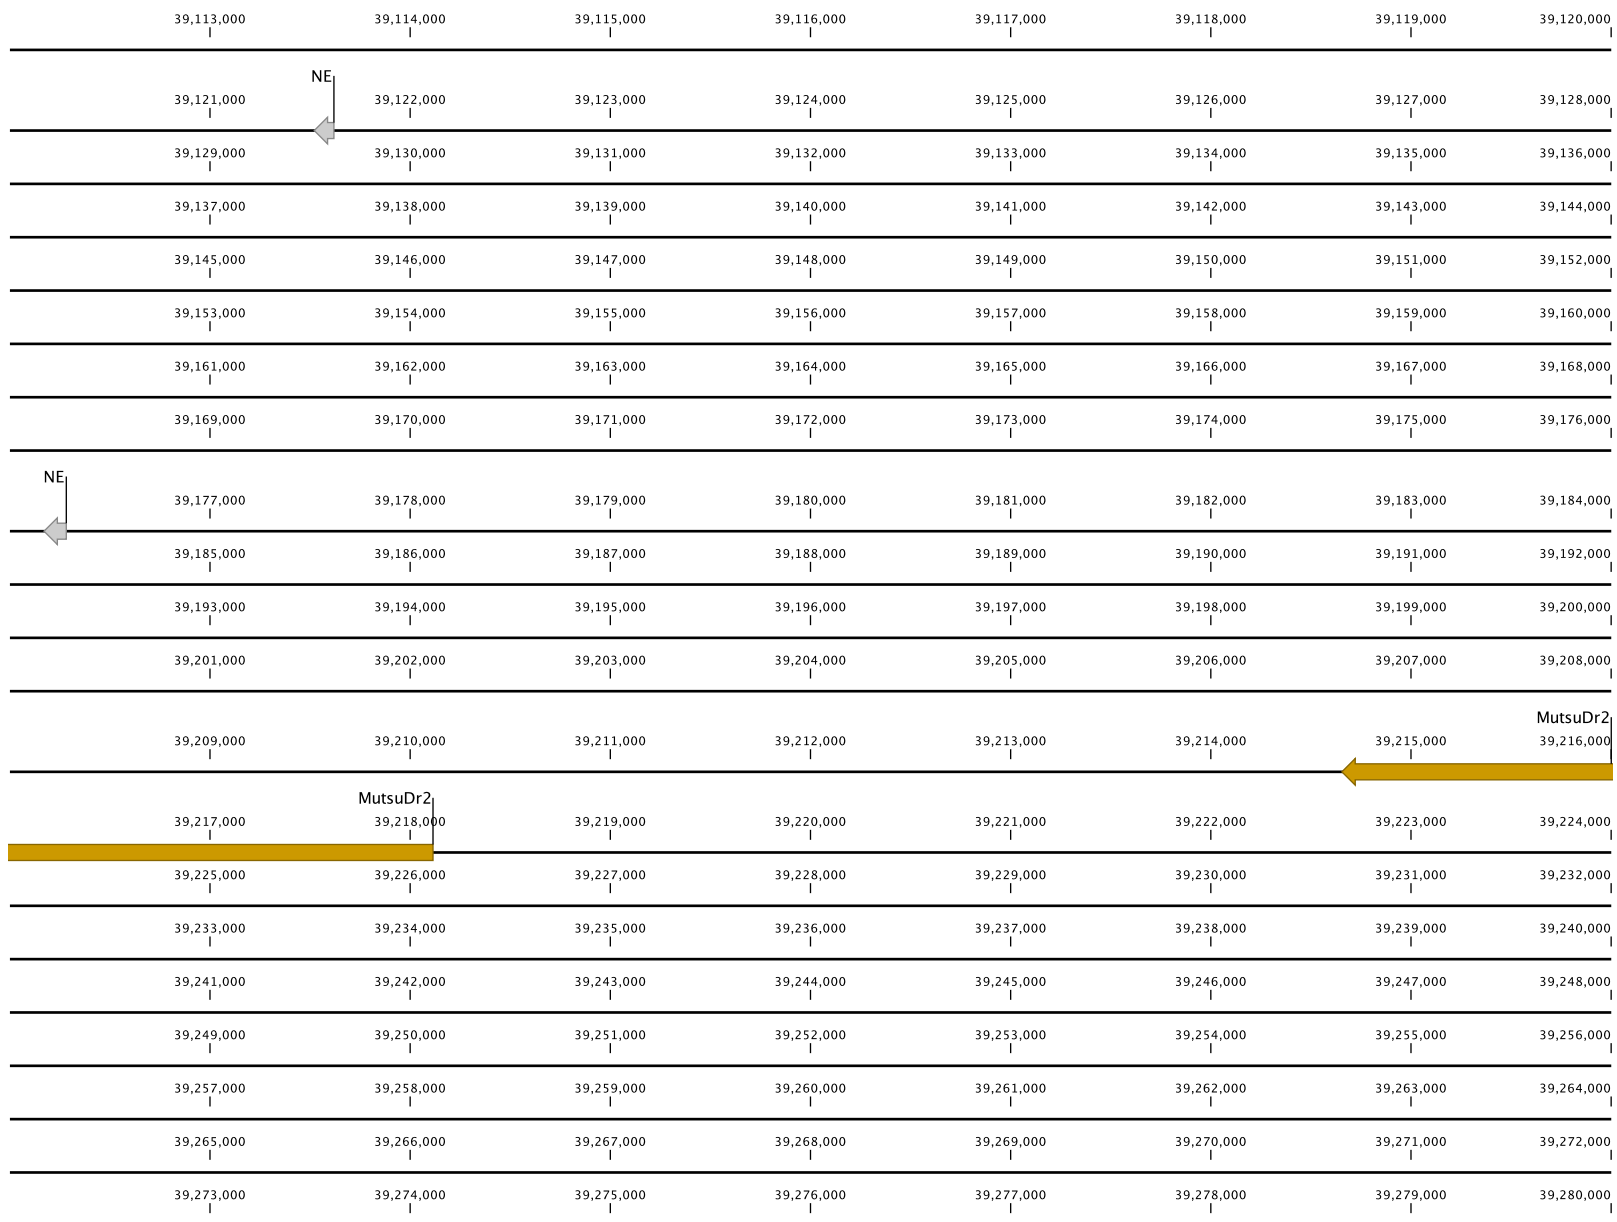

Supplemental Figure S8

|            |            |            |            |            |            |            |            |
|------------|------------|------------|------------|------------|------------|------------|------------|
| 39,281,000 | 39,282,000 | 39,283,000 | 39,284,000 | 39,285,000 | 39,286,000 | 39,287,000 | 39,288,000 |
| 39,289,000 | 39,290,000 | 39,291,000 | 39,292,000 | 39,293,000 | 39,294,000 | 39,295,000 | 39,296,000 |
| 39,297,000 | 39,298,000 | 39,299,000 | 39,300,000 | 39,301,000 | 39,302,000 | 39,303,000 | 39,304,000 |
| 39,305,000 | 39,306,000 | 39,307,000 | 39,308,000 | 39,309,000 | 39,310,000 | 39,311,000 | 39,312,000 |
| 39,313,000 | 39,314,000 | 39,315,000 | 39,316,000 | 39,317,000 | 39,318,000 | 39,319,000 | 39,320,000 |
| 39,321,000 | 39,322,000 | 39,323,000 | 39,324,000 | 39,325,000 | 39,326,000 | 39,327,000 | 39,328,000 |
| 39,329,000 | 39,330,000 | 39,331,000 | 39,332,000 | 39,333,000 | 39,334,000 | 39,335,000 | 39,336,000 |
| 39,337,000 | 39,338,000 | 39,339,000 | 39,340,000 | 39,341,000 | 39,342,000 | 39,343,000 | 39,344,000 |
| 39,345,000 | 39,346,000 | 39,347,000 | 39,348,000 | 39,349,000 | 39,350,000 | 39,351,000 | 39,352,000 |
| 39,353,000 | 39,354,000 | 39,355,000 | 39,356,000 | 39,357,000 | 39,358,000 | 39,359,000 | 39,360,000 |
| 39,361,000 | 39,362,000 | 39,363,000 | 39,364,000 | 39,365,000 | 39,366,000 | 39,367,000 | 39,368,000 |
| 39,369,000 | 39,370,000 | 39,371,000 | 39,372,000 | 39,373,000 | 39,374,000 | 39,375,000 | 39,376,000 |
| 39,377,000 | 39,378,000 | 39,379,000 | 39,380,000 | 39,381,000 | 39,382,000 | 39,383,000 | 39,384,000 |
| 39,385,000 | 39,386,000 | 39,387,000 | 39,388,000 | 39,389,000 | 39,390,000 | 39,391,000 | 39,392,000 |
| 39,393,000 | 39,394,000 | 39,395,000 | 39,396,000 | 39,397,000 | 39,398,000 | 39,399,000 | 39,400,000 |
| 39,401,000 | 39,402,000 | 39,403,000 | 39,404,000 | 39,405,000 | 39,406,000 | 39,407,000 | 39,408,000 |
| 39,409,000 | 39,410,000 | 39,411,000 | 39,412,000 | 39,413,000 | 39,414,000 | 39,415,000 | 39,416,000 |
| 39,417,000 | 39,418,000 | 39,419,000 | 39,420,000 | 39,421,000 | 39,422,000 | 39,423,000 | 39,424,000 |
| 39,425,000 | 39,426,000 | 39,427,000 | 39,428,000 | 39,429,000 | 39,430,000 | 39,431,000 | 39,432,000 |
| 39,433,000 | 39,434,000 | 39,435,000 | 39,436,000 | 39,437,000 | 39,438,000 | 39,439,000 | 39,440,000 |
| 39,441,000 | 39,442,000 | 39,443,000 | 39,444,000 | 39,445,000 | 39,446,000 | 39,447,000 | 39,448,000 |
| 39,449,000 | 39,450,000 | 39,451,000 | 39,452,000 | 39,453,000 | 39,454,000 | 39,455,000 | 39,456,000 |
| 39,457,000 | 39,458,000 | 39,459,000 | 39,460,000 | 39,461,000 | 39,462,000 | 39,463,000 | 39,464,000 |

NE

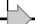



Supplemental Figure S8

|            |            |            |            |            |            |            |            |
|------------|------------|------------|------------|------------|------------|------------|------------|
| 39,465,000 | 39,466,000 | 39,467,000 | 39,468,000 | 39,469,000 | 39,470,000 | 39,471,000 | 39,472,000 |
| 39,473,000 | 39,474,000 | 39,475,000 | 39,476,000 | 39,477,000 | 39,478,000 | 39,479,000 | 39,480,000 |
| 39,481,000 | 39,482,000 | 39,483,000 | 39,484,000 | 39,485,000 | 39,486,000 | 39,487,000 | 39,488,000 |
| 39,489,000 | 39,490,000 | 39,491,000 | 39,492,000 | 39,493,000 | 39,494,000 | 39,495,000 | 39,496,000 |
| 39,497,000 | 39,498,000 | 39,499,000 | 39,500,000 | 39,501,000 | 39,502,000 | 39,503,000 | 39,504,000 |
| 39,505,000 | 39,506,000 | 39,507,000 | 39,508,000 | 39,509,000 | 39,510,000 | 39,511,000 | 39,512,000 |
| 39,513,000 | 39,514,000 | 39,515,000 | 39,516,000 | 39,517,000 | 39,518,000 | 39,519,000 | 39,520,000 |
| 39,521,000 | 39,522,000 | 39,523,000 | 39,524,000 | 39,525,000 | 39,526,000 | 39,527,000 | 39,528,000 |
| 39,529,000 | 39,530,000 | 39,531,000 | 39,532,000 | 39,533,000 | 39,534,000 | 39,535,000 | 39,536,000 |
| 39,537,000 | 39,538,000 | 39,539,000 | 39,540,000 | 39,541,000 | 39,542,000 | 39,543,000 | 39,544,000 |
| 39,545,000 | 39,546,000 | 39,547,000 | 39,548,000 | 39,549,000 | 39,550,000 | 39,551,000 | 39,552,000 |
| 39,553,000 | 39,554,000 | 39,555,000 | 39,556,000 | 39,557,000 | 39,558,000 | 39,559,000 | 39,560,000 |
| 39,561,000 | 39,562,000 | 39,563,000 | 39,564,000 | 39,565,000 | 39,566,000 | 39,567,000 | 39,568,000 |
| 39,569,000 | 39,570,000 | 39,571,000 | 39,572,000 | 39,573,000 | 39,574,000 | 39,575,000 | 39,576,000 |
| 39,577,000 | 39,578,000 | 39,579,000 | 39,580,000 | 39,581,000 | 39,582,000 | 39,583,000 | 39,584,000 |
| 39,585,000 | 39,586,000 | 39,587,000 | 39,588,000 | 39,589,000 | 39,590,000 | 39,591,000 | 39,592,000 |
| 39,593,000 | 39,594,000 | 39,595,000 | 39,596,000 | 39,597,000 | 39,598,000 | 39,599,000 | 39,600,000 |
| 39,601,000 | 39,602,000 | 39,603,000 | 39,604,000 | 39,605,000 | 39,606,000 | 39,607,000 | 39,608,000 |
| 39,609,000 | 39,610,000 | 39,611,000 | 39,612,000 | 39,613,000 | 39,614,000 | 39,615,000 | 39,616,000 |
| 39,617,000 | 39,618,000 | 39,619,000 | 39,620,000 | 39,621,000 | 39,622,000 | 39,623,000 | 39,624,000 |
| 39,625,000 | 39,626,000 | 39,627,000 | 39,628,000 | 39,629,000 | 39,630,000 | 39,631,000 | 39,632,000 |
| 39,633,000 | 39,634,000 | 39,635,000 | 39,636,000 | 39,637,000 | 39,638,000 | 39,639,000 | 39,640,000 |
| 39,641,000 | 39,642,000 | 39,643,000 | 39,644,000 | 39,645,000 | 39,646,000 | 39,647,000 | 39,648,000 |

Supplemental Figure S8

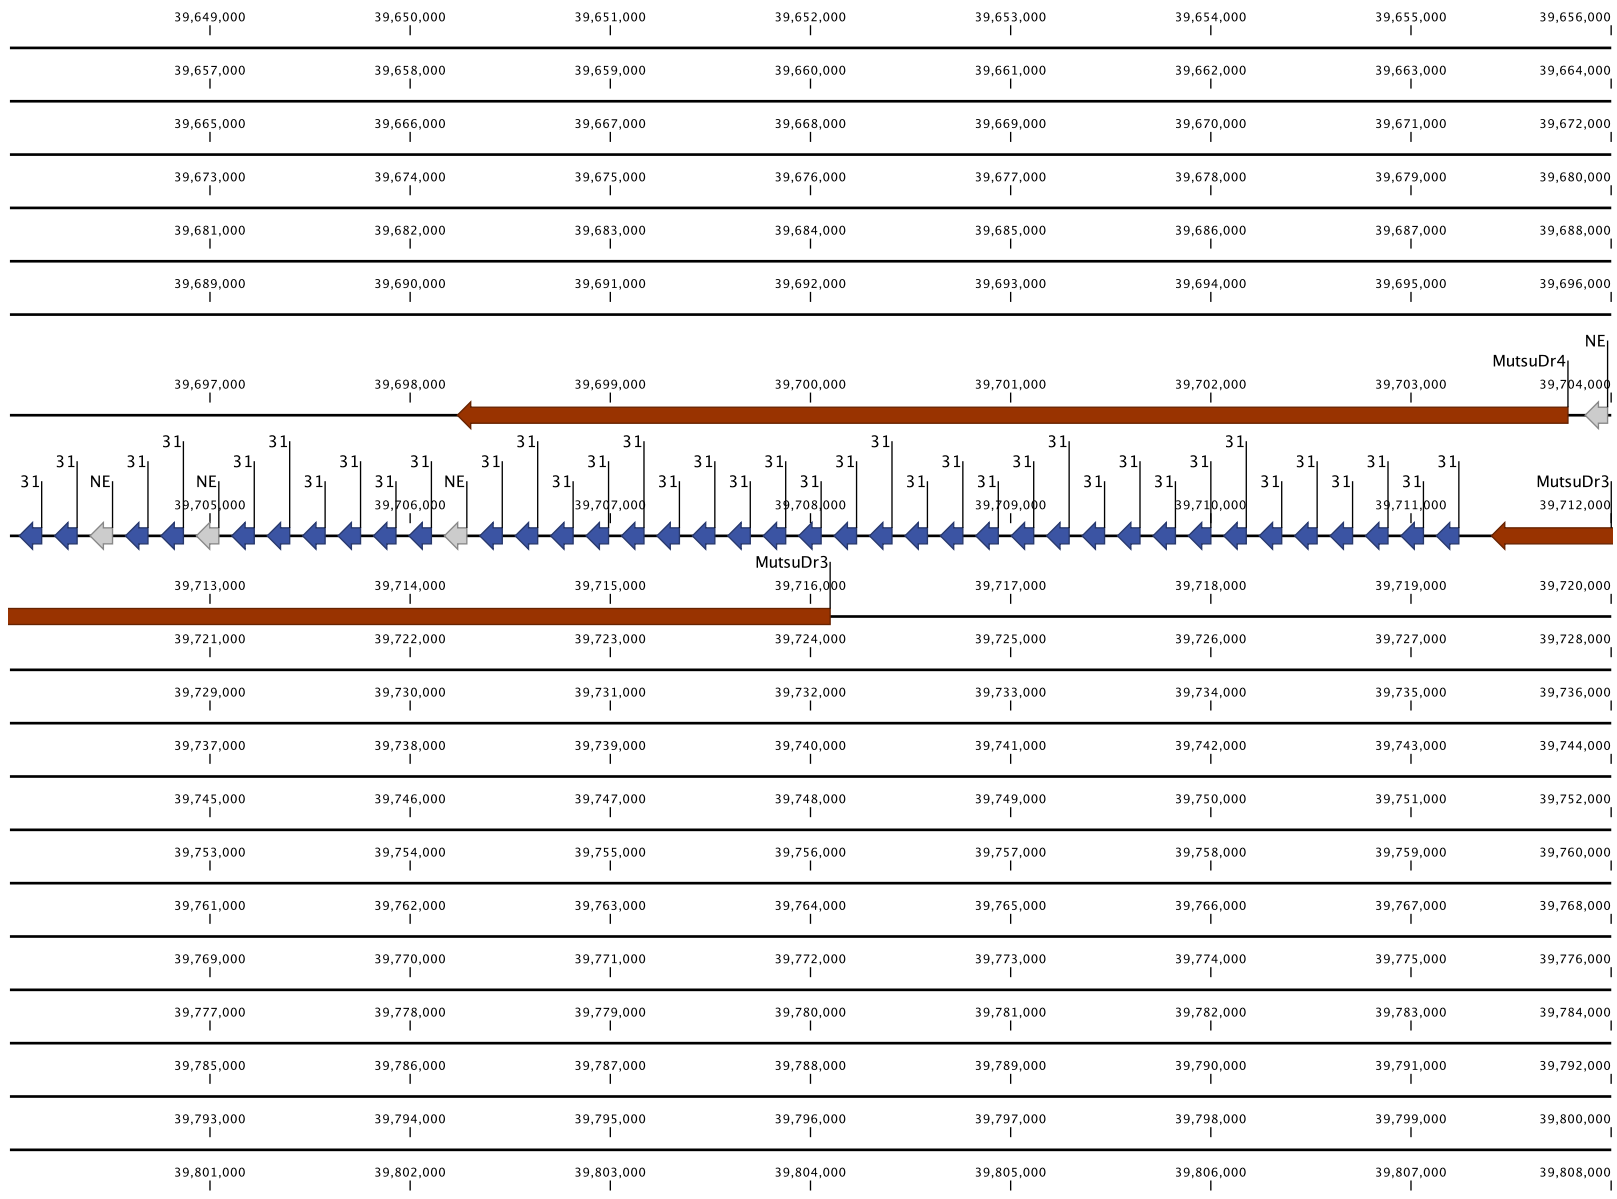

Supplemental Figure S8

|                  |            |            |            |            |            |            |            |
|------------------|------------|------------|------------|------------|------------|------------|------------|
| 39,809,000       | 39,810,000 | 39,811,000 | 39,812,000 | 39,813,000 | 39,814,000 | 39,815,000 | 39,816,000 |
| 39,817,000       | 39,818,000 | 39,819,000 | 39,820,000 | 39,821,000 | 39,822,000 | 39,823,000 | 39,824,000 |
| 39,825,000       | 39,826,000 | 39,827,000 | 39,828,000 | 39,829,000 | 39,830,000 | 39,831,000 | 39,832,000 |
| 39,833,000       | 39,834,000 | 39,835,000 | 39,836,000 | 39,837,000 | 39,838,000 | 39,839,000 | 39,840,000 |
| 39,841,000       | 39,842,000 | 39,843,000 | 39,844,000 | 39,845,000 | 39,846,000 | 39,847,000 | 39,848,000 |
| 39,849,000       | 39,850,000 | 39,851,000 | 39,852,000 | 39,853,000 | 39,854,000 | 39,855,000 | 39,856,000 |
| 39,857,000       | 39,858,000 | 39,859,000 | 39,860,000 | 39,861,000 | 39,862,000 | 39,863,000 | 39,864,000 |
| 39,865,000       | 39,866,000 | 39,867,000 | 39,868,000 | 39,869,000 | 39,870,000 | 39,871,000 | 39,872,000 |
| 39,873,000       | 39,874,000 | 39,875,000 | 39,876,000 | 39,877,000 | 39,878,000 | 39,879,000 | 39,880,000 |
| 39,881,000       | 39,882,000 | 39,883,000 | 39,884,000 | 39,885,000 | 39,886,000 | 39,887,000 | 39,888,000 |
| 39,889,000       | 39,890,000 | 39,891,000 | 39,892,000 | 39,893,000 | 39,894,000 | 39,895,000 | 39,896,000 |
| 39,897,000       | 39,898,000 | 39,899,000 | 39,900,000 | 39,901,000 | 39,902,000 | 39,903,000 | 39,904,000 |
| NE<br>39,905,000 | 39,906,000 | 39,907,000 | 39,908,000 | 39,909,000 | 39,910,000 | 39,911,000 | 39,912,000 |
| 39,913,000       | 39,914,000 | 39,915,000 | 39,916,000 | 39,917,000 | 39,918,000 | 39,919,000 | 39,920,000 |
| 39,921,000       | 39,922,000 | 39,923,000 | 39,924,000 | 39,925,000 | 39,926,000 | 39,927,000 | 39,928,000 |
| 39,929,000       | 39,930,000 | 39,931,000 | 39,932,000 | 39,933,000 | 39,934,000 | 39,935,000 | 39,936,000 |
| 39,937,000       | 39,938,000 | 39,939,000 | 39,940,000 | 39,941,000 | 39,942,000 | 39,943,000 | 39,944,000 |
| 39,945,000       | 39,946,000 | 39,947,000 | 39,948,000 | 39,949,000 | 39,950,000 | 39,951,000 | 39,952,000 |
| 39,953,000       | 39,954,000 | 39,955,000 | 39,956,000 | 39,957,000 | 39,958,000 | 39,959,000 | 39,960,000 |
| 39,961,000       | 39,962,000 | 39,963,000 | 39,964,000 | 39,965,000 | 39,966,000 | 39,967,000 | 39,968,000 |
| 39,969,000       | 39,970,000 | 39,971,000 | 39,972,000 | 39,973,000 | 39,974,000 | 39,975,000 | 39,976,000 |
| 39,977,000       | 39,978,000 | 39,979,000 | 39,980,000 | 39,981,000 | 39,982,000 | 39,983,000 | 39,984,000 |
| 39,985,000       | 39,986,000 | 39,987,000 | 39,988,000 | 39,989,000 | 39,990,000 | 39,991,000 | 39,992,000 |

Supplemental Figure S8

|            |            |            |            |            |            |            |            |
|------------|------------|------------|------------|------------|------------|------------|------------|
| 39,993,000 | 39,994,000 | 39,995,000 | 39,996,000 | 39,997,000 | 39,998,000 | 39,999,000 | 40,000,000 |
| 40,001,000 | 40,002,000 | 40,003,000 | 40,004,000 | 40,005,000 | 40,006,000 | 40,007,000 | 40,008,000 |
| 40,009,000 | 40,010,000 | 40,011,000 | 40,012,000 | 40,013,000 | 40,014,000 | 40,015,000 | 40,016,000 |
| 40,017,000 | 40,018,000 | 40,019,000 | 40,020,000 | 40,021,000 | 40,022,000 | 40,023,000 | 40,024,000 |
| 40,025,000 | 40,026,000 | 40,027,000 | 40,028,000 | 40,029,000 | 40,030,000 | 40,031,000 | 40,032,000 |
| 40,033,000 | 40,034,000 | 40,035,000 | 40,036,000 | 40,037,000 | 40,038,000 | 40,039,000 | 40,040,000 |
| 40,041,000 | 40,042,000 | 40,043,000 | 40,044,000 | 40,045,000 | 40,046,000 | 40,047,000 | 40,048,000 |
| 40,049,000 | 40,050,000 | 40,051,000 | 40,052,000 | 40,053,000 | 40,054,000 | 40,055,000 | 40,056,000 |
| 40,057,000 | 40,058,000 | 40,059,000 | 40,060,000 | 40,061,000 | 40,062,000 | 40,063,000 | 40,064,000 |
| 40,065,000 | 40,066,000 | 40,067,000 | 40,068,000 | 40,069,000 | 40,070,000 | 40,071,000 | 40,072,000 |
| 40,073,000 | 40,074,000 | 40,075,000 | 40,076,000 | 40,077,000 | 40,078,000 | 40,079,000 | 40,080,000 |
| 40,081,000 | 40,082,000 | 40,083,000 | 40,084,000 | 40,085,000 | 40,086,000 | 40,087,000 | 40,088,000 |
| 40,089,000 | 40,090,000 | 40,091,000 | 40,092,000 | 40,093,000 | 40,094,000 | 40,095,000 | 40,096,000 |
| 40,097,000 | 40,098,000 | 40,099,000 | 40,100,000 | 40,101,000 | 40,102,000 | 40,103,000 | 40,104,000 |
| 40,105,000 | 40,106,000 | 40,107,000 | 40,108,000 | 40,109,000 | 40,110,000 | 40,111,000 | 40,112,000 |
| 40,113,000 | 40,114,000 | 40,115,000 | 40,116,000 | 40,117,000 | 40,118,000 | 40,119,000 | 40,120,000 |
| 40,121,000 | 40,122,000 | 40,123,000 | 40,124,000 | 40,125,000 | 40,126,000 | 40,127,000 | 40,128,000 |
| 40,129,000 | 40,130,000 | 40,131,000 | 40,132,000 | 40,133,000 | 40,134,000 | 40,135,000 | 40,136,000 |
| 40,137,000 | 40,138,000 | 40,139,000 | 40,140,000 | 40,141,000 | 40,142,000 | 40,143,000 | 40,144,000 |
| 40,145,000 | 40,146,000 | 40,147,000 | 40,148,000 | 40,149,000 | 40,150,000 | 40,151,000 | 40,152,000 |
| 40,153,000 | 40,154,000 | 40,155,000 | 40,156,000 | 40,157,000 | 40,158,000 | 40,159,000 | 40,160,000 |
| 40,161,000 | 40,162,000 | 40,163,000 | 40,164,000 | 40,165,000 | 40,166,000 | 40,167,000 | 40,168,000 |
| 40,169,000 | 40,170,000 | 40,171,000 | 40,172,000 | 40,173,000 | 40,174,000 | 40,175,000 | 40,176,000 |

NE

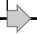

Supplemental Figure S8

|            |            |            |            |            |            |            |            |
|------------|------------|------------|------------|------------|------------|------------|------------|
| 40,177,000 | 40,178,000 | 40,179,000 | 40,180,000 | 40,181,000 | 40,182,000 | 40,183,000 | 40,184,000 |
| 40,185,000 | 40,186,000 | 40,187,000 | 40,188,000 | 40,189,000 | 40,190,000 | 40,191,000 | 40,192,000 |
| 40,193,000 | 40,194,000 | 40,195,000 | 40,196,000 | 40,197,000 | 40,198,000 | 40,199,000 | 40,200,000 |
| 40,201,000 | 40,202,000 | 40,203,000 | 40,204,000 | 40,205,000 | 40,206,000 | 40,207,000 | 40,208,000 |
| 40,209,000 | 40,210,000 | 40,211,000 | 40,212,000 | 40,213,000 | 40,214,000 | 40,215,000 | 40,216,000 |
| 40,217,000 | 40,218,000 | 40,219,000 | 40,220,000 | 40,221,000 | 40,222,000 | 40,223,000 | 40,224,000 |
| 40,225,000 | 40,226,000 | 40,227,000 | 40,228,000 | 40,229,000 | 40,230,000 | 40,231,000 | 40,232,000 |
| 40,233,000 | 40,234,000 | 40,235,000 | 40,236,000 | 40,237,000 | 40,238,000 | 40,239,000 | 40,240,000 |
| 40,241,000 | 40,242,000 | 40,243,000 | 40,244,000 | 40,245,000 | 40,246,000 | 40,247,000 | 40,248,000 |
| 40,249,000 | 40,250,000 | 40,251,000 | 40,252,000 | 40,253,000 | 40,254,000 | 40,255,000 | 40,256,000 |
| 40,257,000 | 40,258,000 | 40,259,000 | 40,260,000 | 40,261,000 | 40,262,000 | 40,263,000 | 40,264,000 |
| 40,265,000 | 40,266,000 | 40,267,000 | 40,268,000 | 40,269,000 | 40,270,000 | 40,271,000 | 40,272,000 |
| 40,273,000 | 40,274,000 | 40,275,000 | 40,276,000 | 40,277,000 | 40,278,000 | 40,279,000 | 40,280,000 |
| 40,281,000 | 40,282,000 | 40,283,000 | 40,284,000 | 40,285,000 | 40,286,000 | 40,287,000 | 40,288,000 |
| 40,289,000 | 40,290,000 | 40,291,000 | 40,292,000 | 40,293,000 | 40,294,000 | 40,295,000 | 40,296,000 |
| 40,297,000 | 40,298,000 | 40,299,000 | 40,300,000 | 40,301,000 | 40,302,000 | 40,303,000 | 40,304,000 |
| 40,305,000 | 40,306,000 | 40,307,000 | 40,308,000 | 40,309,000 | 40,310,000 | 40,311,000 | 40,312,000 |
| 40,313,000 | 40,314,000 | 40,315,000 | 40,316,000 | 40,317,000 | 40,318,000 | 40,319,000 | 40,320,000 |
| 40,321,000 | 40,322,000 | 40,323,000 | 40,324,000 | 40,325,000 | 40,326,000 | 40,327,000 | 40,328,000 |
| 40,329,000 | 40,330,000 | 40,331,000 | 40,332,000 | 40,333,000 | 40,334,000 | 40,335,000 | 40,336,000 |
| 40,337,000 | 40,338,000 | 40,339,000 | 40,340,000 | 40,341,000 | 40,342,000 | 40,343,000 | 40,344,000 |
| 40,345,000 | 40,346,000 | 40,347,000 | 40,348,000 | 40,349,000 | 40,350,000 | 40,351,000 | 40,352,000 |
| 40,353,000 | 40,354,000 | 40,355,000 | 40,356,000 | 40,357,000 | 40,358,000 | 40,359,000 | 40,360,000 |

38

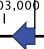

Supplemental Figure S8

|            |            |            |            |            |            |            |            |
|------------|------------|------------|------------|------------|------------|------------|------------|
| 40,361,000 | 40,362,000 | 40,363,000 | 40,364,000 | 40,365,000 | 40,366,000 | 40,367,000 | 40,368,000 |
| 40,369,000 | 40,370,000 | 40,371,000 | 40,372,000 | 40,373,000 | 40,374,000 | 40,375,000 | 40,376,000 |
| 40,377,000 | 40,378,000 | 40,379,000 | 40,380,000 | 40,381,000 | 40,382,000 | 40,383,000 | 40,384,000 |
| 40,385,000 | 40,386,000 | 40,387,000 | 40,388,000 | 40,389,000 | 40,390,000 | 40,391,000 | 40,392,000 |
| 40,393,000 | 40,394,000 | 40,395,000 | 40,396,000 | 40,397,000 | 40,398,000 | 40,399,000 | 40,400,000 |
| 40,401,000 | 40,402,000 | 40,403,000 | 40,404,000 | 40,405,000 | 40,406,000 | 40,407,000 | 40,408,000 |
| 40,409,000 | 40,410,000 | 40,411,000 | 40,412,000 | 40,413,000 | 40,414,000 | 40,415,000 | 40,416,000 |
| 40,417,000 | 40,418,000 | 40,419,000 | 40,420,000 | 40,421,000 | 40,422,000 | 40,423,000 | 40,424,000 |
| 40,425,000 | 40,426,000 | 40,427,000 | 40,428,000 | 40,429,000 | 40,430,000 | 40,431,000 | 40,432,000 |
| 40,433,000 | 40,434,000 | 40,435,000 | 40,436,000 | 40,437,000 | 40,438,000 | 40,439,000 | 40,440,000 |
| 40,441,000 | 40,442,000 | 40,443,000 | 40,444,000 | 40,445,000 | 40,446,000 | 40,447,000 | 40,448,000 |
| 40,449,000 | 40,450,000 | 40,451,000 | 40,452,000 | 40,453,000 | 40,454,000 | 40,455,000 | 40,456,000 |
| 40,457,000 | 40,458,000 | 40,459,000 | 40,460,000 | 40,461,000 | 40,462,000 | 40,463,000 | 40,464,000 |
| 40,465,000 | 40,466,000 | 40,467,000 | 40,468,000 | 40,469,000 | 40,470,000 | 40,471,000 | 40,472,000 |
| 40,473,000 | 40,474,000 | 40,475,000 | 40,476,000 | 40,477,000 | 40,478,000 | 40,479,000 | 40,480,000 |
| 40,481,000 | 40,482,000 | 40,483,000 | 40,484,000 | 40,485,000 | 40,486,000 | 40,487,000 | 40,488,000 |
| 40,489,000 | 40,490,000 | 40,491,000 | 40,492,000 | 40,493,000 | 40,494,000 | 40,495,000 | 40,496,000 |
| 40,497,000 | 40,498,000 | 40,499,000 | 40,500,000 | 40,501,000 | 40,502,000 | 40,503,000 | 40,504,000 |
| 40,505,000 | 40,506,000 | 40,507,000 | 40,508,000 | 40,509,000 | 40,510,000 | 40,511,000 | 40,512,000 |
| 40,513,000 | 40,514,000 | 40,515,000 | 40,516,000 | 40,517,000 | 40,518,000 | 40,519,000 | 40,520,000 |
| 40,521,000 | 40,522,000 | 40,523,000 | 40,524,000 | 40,525,000 | 40,526,000 | 40,527,000 | 40,528,000 |
| 40,529,000 | 40,530,000 | 40,531,000 | 40,532,000 | 40,533,000 | 40,534,000 | 40,535,000 | 40,536,000 |
| 40,537,000 | 40,538,000 | 40,539,000 | 40,540,000 | 40,541,000 | 40,542,000 | 40,543,000 | 40,544,000 |

Supplemental Figure S8

|            |            |            |            |            |            |            |            |
|------------|------------|------------|------------|------------|------------|------------|------------|
| 40,545,000 | 40,546,000 | 40,547,000 | 40,548,000 | 40,549,000 | 40,550,000 | 40,551,000 | 40,552,000 |
| 40,553,000 | 40,554,000 | 40,555,000 | 40,556,000 | 40,557,000 | 40,558,000 | 40,559,000 | 40,560,000 |
| 40,561,000 | 40,562,000 | 40,563,000 | 40,564,000 | 40,565,000 | 40,566,000 | 40,567,000 | 40,568,000 |
| 40,569,000 | 40,570,000 | 40,571,000 | 40,572,000 | 40,573,000 | 40,574,000 | 40,575,000 | 40,576,000 |
| 40,577,000 | 40,578,000 | 40,579,000 | 40,580,000 | 40,581,000 | 40,582,000 | 40,583,000 | 40,584,000 |
| 40,585,000 | 40,586,000 | 40,587,000 | 40,588,000 | 40,589,000 | 40,590,000 | 40,591,000 | 40,592,000 |
| 40,593,000 | 40,594,000 | 40,595,000 | 40,596,000 | 40,597,000 | 40,598,000 | 40,599,000 | 40,600,000 |
| 40,601,000 | 40,602,000 | 40,603,000 | 40,604,000 | 40,605,000 | 40,606,000 | 40,607,000 | 40,608,000 |
| 40,609,000 | 40,610,000 | 40,611,000 | 40,612,000 | 40,613,000 | 40,614,000 | 40,615,000 | 40,616,000 |
| 40,617,000 | 40,618,000 | 40,619,000 | 40,620,000 | 40,621,000 | 40,622,000 | 40,623,000 | 40,624,000 |
| 40,625,000 | 40,626,000 | 40,627,000 | 40,628,000 | 40,629,000 | 40,630,000 | 40,631,000 | 40,632,000 |
| 40,633,000 | 40,634,000 | 40,635,000 | 40,636,000 | 40,637,000 | 40,638,000 | 40,639,000 | 40,640,000 |
| 40,641,000 | 40,642,000 | 40,643,000 | 40,644,000 | 40,645,000 | 40,646,000 | 40,647,000 | 40,648,000 |
| 40,649,000 | 40,650,000 | 40,651,000 | 40,652,000 | 40,653,000 | 40,654,000 | 40,655,000 | 40,656,000 |
| 40,657,000 | 40,658,000 | 40,659,000 | 40,660,000 | 40,661,000 | 40,662,000 | 40,663,000 | 40,664,000 |
| 40,665,000 | 40,666,000 | 40,667,000 | 40,668,000 | 40,669,000 | 40,670,000 | 40,671,000 | 40,672,000 |
| 40,673,000 | 40,674,000 | 40,675,000 | 40,676,000 | 40,677,000 | 40,678,000 | 40,679,000 | 40,680,000 |
| 40,681,000 | 40,682,000 | 40,683,000 | 40,684,000 | 40,685,000 | 40,686,000 | 40,687,000 | 40,688,000 |
| 40,689,000 | 40,690,000 | 40,691,000 | 40,692,000 | 40,693,000 | 40,694,000 | 40,695,000 | 40,696,000 |
| 40,697,000 | 40,698,000 | 40,699,000 | 40,700,000 | 40,701,000 | 40,702,000 | 40,703,000 | 40,704,000 |
| 40,705,000 | 40,706,000 | 40,707,000 | 40,708,000 | 40,709,000 | 40,710,000 | 40,711,000 | 40,712,000 |
| 40,713,000 | 40,714,000 | 40,715,000 | 40,716,000 | 40,717,000 | 40,718,000 | 40,719,000 | 40,720,000 |
| 40,721,000 | 40,722,000 | 40,723,000 | 40,724,000 | 40,725,000 | 40,726,000 | 40,727,000 | 40,728,000 |

Supplemental Figure S8

|            |            |            |            |            |            |            |            |
|------------|------------|------------|------------|------------|------------|------------|------------|
| 40,729,000 | 40,730,000 | 40,731,000 | 40,732,000 | 40,733,000 | 40,734,000 | 40,735,000 | 40,736,000 |
| 40,737,000 | 40,738,000 | 40,739,000 | 40,740,000 | 40,741,000 | 40,742,000 | 40,743,000 | 40,744,000 |
| 40,745,000 | 40,746,000 | 40,747,000 | 40,748,000 | 40,749,000 | 40,750,000 | 40,751,000 | 40,752,000 |
| 40,753,000 | 40,754,000 | 40,755,000 | 40,756,000 | 40,757,000 | 40,758,000 | 40,759,000 | 40,760,000 |
| 40,761,000 | 40,762,000 | 40,763,000 | 40,764,000 | 40,765,000 | 40,766,000 | 40,767,000 | 40,768,000 |
| 40,769,000 | 40,770,000 | 40,771,000 | 40,772,000 | 40,773,000 | 40,774,000 | 40,775,000 | 40,776,000 |
| 40,777,000 | 40,778,000 | 40,779,000 | 40,780,000 | 40,781,000 | 40,782,000 | 40,783,000 | 40,784,000 |
| 40,785,000 | 40,786,000 | 40,787,000 | 40,788,000 | 40,789,000 | 40,790,000 | 40,791,000 | 40,792,000 |
| 40,793,000 | 40,794,000 | 40,795,000 | 40,796,000 | 40,797,000 | 40,798,000 | 40,799,000 | 40,800,000 |
| 40,801,000 | 40,802,000 | 40,803,000 | 40,804,000 | 40,805,000 | 40,806,000 | 40,807,000 | 40,808,000 |
| 40,809,000 | 40,810,000 | 40,811,000 | 40,812,000 | 40,813,000 | 40,814,000 | 40,815,000 | 40,816,000 |
| 40,817,000 | 40,818,000 | 40,819,000 | 40,820,000 | 40,821,000 | 40,822,000 | 40,823,000 | 40,824,000 |
| 40,825,000 | 40,826,000 | 40,827,000 | 40,828,000 | 40,829,000 | 40,830,000 | 40,831,000 | 40,832,000 |
| 40,833,000 | 40,834,000 | 40,835,000 | 40,836,000 | 40,837,000 | 40,838,000 | 40,839,000 | 40,840,000 |
| 40,841,000 | 40,842,000 | 40,843,000 | 40,844,000 | 40,845,000 | 40,846,000 | 40,847,000 | 40,848,000 |
| 40,849,000 | 40,850,000 | 40,851,000 | 40,852,000 | 40,853,000 | 40,854,000 | 40,855,000 | 40,856,000 |
| 40,857,000 | 40,858,000 | 40,859,000 | 40,860,000 | 40,861,000 | 40,862,000 | 40,863,000 | 40,864,000 |
| 40,865,000 | 40,866,000 | 40,867,000 | 40,868,000 | 40,869,000 | 40,870,000 | 40,871,000 | 40,872,000 |
| 40,873,000 | 40,874,000 | 40,875,000 | 40,876,000 | 40,877,000 | 40,878,000 | 40,879,000 | 40,880,000 |
| 40,881,000 | 40,882,000 | 40,883,000 | 40,884,000 | 40,885,000 | 40,886,000 | 40,887,000 | 40,888,000 |
| 40,889,000 | 40,890,000 | 40,891,000 | 40,892,000 | 40,893,000 | 40,894,000 | 40,895,000 | 40,896,000 |
| 40,897,000 | 40,898,000 | 40,899,000 | 40,900,000 | 40,901,000 | 40,902,000 | 40,903,000 | 40,904,000 |
| 40,905,000 | 40,906,000 | 40,907,000 | 40,908,000 | 40,909,000 | 40,910,000 | 40,911,000 | 40,912,000 |



Supplemental Figure S8

|            |            |            |            |            |            |            |            |
|------------|------------|------------|------------|------------|------------|------------|------------|
| 40,913,000 | 40,914,000 | 40,915,000 | 40,916,000 | 40,917,000 | 40,918,000 | 40,919,000 | 40,920,000 |
| 40,921,000 | 40,922,000 | 40,923,000 | 40,924,000 | 40,925,000 | 40,926,000 | 40,927,000 | 40,928,000 |
| 40,929,000 | 40,930,000 | 40,931,000 | 40,932,000 | 40,933,000 | 40,934,000 | 40,935,000 | 40,936,000 |
| 40,937,000 | 40,938,000 | 40,939,000 | 40,940,000 | 40,941,000 | 40,942,000 | 40,943,000 | 40,944,000 |
| 40,945,000 | 40,946,000 | 40,947,000 | 40,948,000 | 40,949,000 | 40,950,000 | 40,951,000 | 40,952,000 |
| 40,953,000 | 40,954,000 | 40,955,000 | 40,956,000 | 40,957,000 | 40,958,000 | 40,959,000 | 40,960,000 |
| 40,961,000 | 40,962,000 | 40,963,000 | 40,964,000 | 40,965,000 | 40,966,000 | 40,967,000 | 40,968,000 |
| 40,969,000 | 40,970,000 | 40,971,000 | 40,972,000 | 40,973,000 | 40,974,000 | 40,975,000 | 40,976,000 |
| 40,977,000 | 40,978,000 | 40,979,000 | 40,980,000 | 40,981,000 | 40,982,000 | 40,983,000 | 40,984,000 |
| 40,985,000 | 40,986,000 | 40,987,000 | 40,988,000 | 40,989,000 | 40,990,000 | 40,991,000 | 40,992,000 |
| 40,993,000 | 40,994,000 | 40,995,000 | 40,996,000 | 40,997,000 | 40,998,000 | 40,999,000 | 41,000,000 |
| 41,001,000 | 41,002,000 | 41,003,000 | 41,004,000 | 41,005,000 | 41,006,000 | 41,007,000 | 41,008,000 |
| 41,009,000 | 41,010,000 | 41,011,000 | 41,012,000 | 41,013,000 | 41,014,000 | 41,015,000 | 41,016,000 |
| 41,017,000 | 41,018,000 | 41,019,000 | 41,020,000 | 41,021,000 | 41,022,000 | 41,023,000 | 41,024,000 |
| 41,025,000 | 41,026,000 | 41,027,000 | 41,028,000 | 41,029,000 | 41,030,000 | 41,031,000 | 41,032,000 |
| 41,033,000 | 41,034,000 | 41,035,000 | 41,036,000 | 41,037,000 | 41,038,000 | 41,039,000 | 41,040,000 |
| 41,041,000 | 41,042,000 | 41,043,000 | 41,044,000 | 41,045,000 | 41,046,000 | 41,047,000 | 41,048,000 |
| 41,049,000 | 41,050,000 | 41,051,000 | 41,052,000 | 41,053,000 | 41,054,000 | 41,055,000 | 41,056,000 |
| 41,057,000 | 41,058,000 | 41,059,000 | 41,060,000 | 41,061,000 | 41,062,000 | 41,063,000 | 41,064,000 |
| 41,065,000 | 41,066,000 | 41,067,000 | 41,068,000 | 41,069,000 | 41,070,000 | 41,071,000 | 41,072,000 |
| 41,073,000 | 41,074,000 | 41,075,000 | 41,076,000 | 41,077,000 | 41,078,000 | 41,079,000 | 41,080,000 |
| 41,081,000 | 41,082,000 | 41,083,000 | 41,084,000 | 41,085,000 | 41,086,000 | 41,087,000 | 41,088,000 |
| 41,089,000 | 41,090,000 | 41,091,000 | 41,092,000 | 41,093,000 | 41,094,000 | 41,095,000 | 41,096,000 |

Supplemental Figure S8

|            |            |            |            |            |            |            |            |
|------------|------------|------------|------------|------------|------------|------------|------------|
| 41,097,000 | 41,098,000 | 41,099,000 | 41,100,000 | 41,101,000 | 41,102,000 | 41,103,000 | 41,104,000 |
| 41,105,000 | 41,106,000 | 41,107,000 | 41,108,000 | 41,109,000 | 41,110,000 | 41,111,000 | 41,112,000 |
| 41,113,000 | 41,114,000 | 41,115,000 | 41,116,000 | 41,117,000 | 41,118,000 | 41,119,000 | 41,120,000 |
| 41,121,000 | 41,122,000 | 41,123,000 | 41,124,000 | 41,125,000 | 41,126,000 | 41,127,000 | 41,128,000 |
| 41,129,000 | 41,130,000 | 41,131,000 | 41,132,000 | 41,133,000 | 41,134,000 | 41,135,000 | 41,136,000 |
| 41,137,000 | 41,138,000 | 41,139,000 | 41,140,000 | 41,141,000 | 41,142,000 | 41,143,000 | 41,144,000 |
| 41,145,000 | 41,146,000 | 41,147,000 | 41,148,000 | 41,149,000 | 41,150,000 | 41,151,000 | 41,152,000 |
| 41,153,000 | 41,154,000 | 41,155,000 | 41,156,000 | 41,157,000 | 41,158,000 | 41,159,000 | 41,160,000 |
| 41,161,000 | 41,162,000 | 41,163,000 | 41,164,000 | 41,165,000 | 41,166,000 | 41,167,000 | 41,168,000 |
| 41,169,000 | 41,170,000 | 41,171,000 | 41,172,000 | 41,173,000 | 41,174,000 | 41,175,000 | 41,176,000 |
| 41,177,000 | 41,178,000 | 41,179,000 | 41,180,000 | 41,181,000 | 41,182,000 | 41,183,000 | 41,184,000 |
| 41,185,000 | 41,186,000 | 41,187,000 | 41,188,000 | 41,189,000 | 41,190,000 | 41,191,000 | 41,192,000 |
| 41,193,000 | 41,194,000 | 41,195,000 | 41,196,000 | 41,197,000 | 41,198,000 | 41,199,000 | 41,200,000 |
| 41,201,000 | 41,202,000 | 41,203,000 | 41,204,000 | 41,205,000 | 41,206,000 | 41,207,000 | 41,208,000 |
| 41,209,000 | 41,210,000 | 41,211,000 | 41,212,000 | 41,213,000 | 41,214,000 | 41,215,000 | 41,216,000 |
| 41,217,000 | 41,218,000 | 41,219,000 | 41,220,000 | 41,221,000 | 41,222,000 | 41,223,000 | 41,224,000 |
| 41,225,000 | 41,226,000 | 41,227,000 | 41,228,000 | 41,229,000 | 41,230,000 | 41,231,000 | 41,232,000 |
| 41,233,000 | 41,234,000 | 41,235,000 | 41,236,000 | 41,237,000 | 41,238,000 | 41,239,000 | 41,240,000 |
| 41,241,000 | 41,242,000 | 41,243,000 | 41,244,000 | 41,245,000 | 41,246,000 | 41,247,000 | 41,248,000 |
| 41,249,000 | 41,250,000 | 41,251,000 | 41,252,000 | 41,253,000 | 41,254,000 | 41,255,000 | 41,256,000 |
| 41,257,000 | 41,258,000 | 41,259,000 | 41,260,000 | 41,261,000 | 41,262,000 | 41,263,000 | 41,264,000 |
| 41,265,000 | 41,266,000 | 41,267,000 | 41,268,000 | 41,269,000 | 41,270,000 | 41,271,000 | 41,272,000 |
| 41,273,000 | 41,274,000 | 41,275,000 | 41,276,000 | 41,277,000 | 41,278,000 | 41,279,000 | 41,280,000 |

Supplemental Figure S8

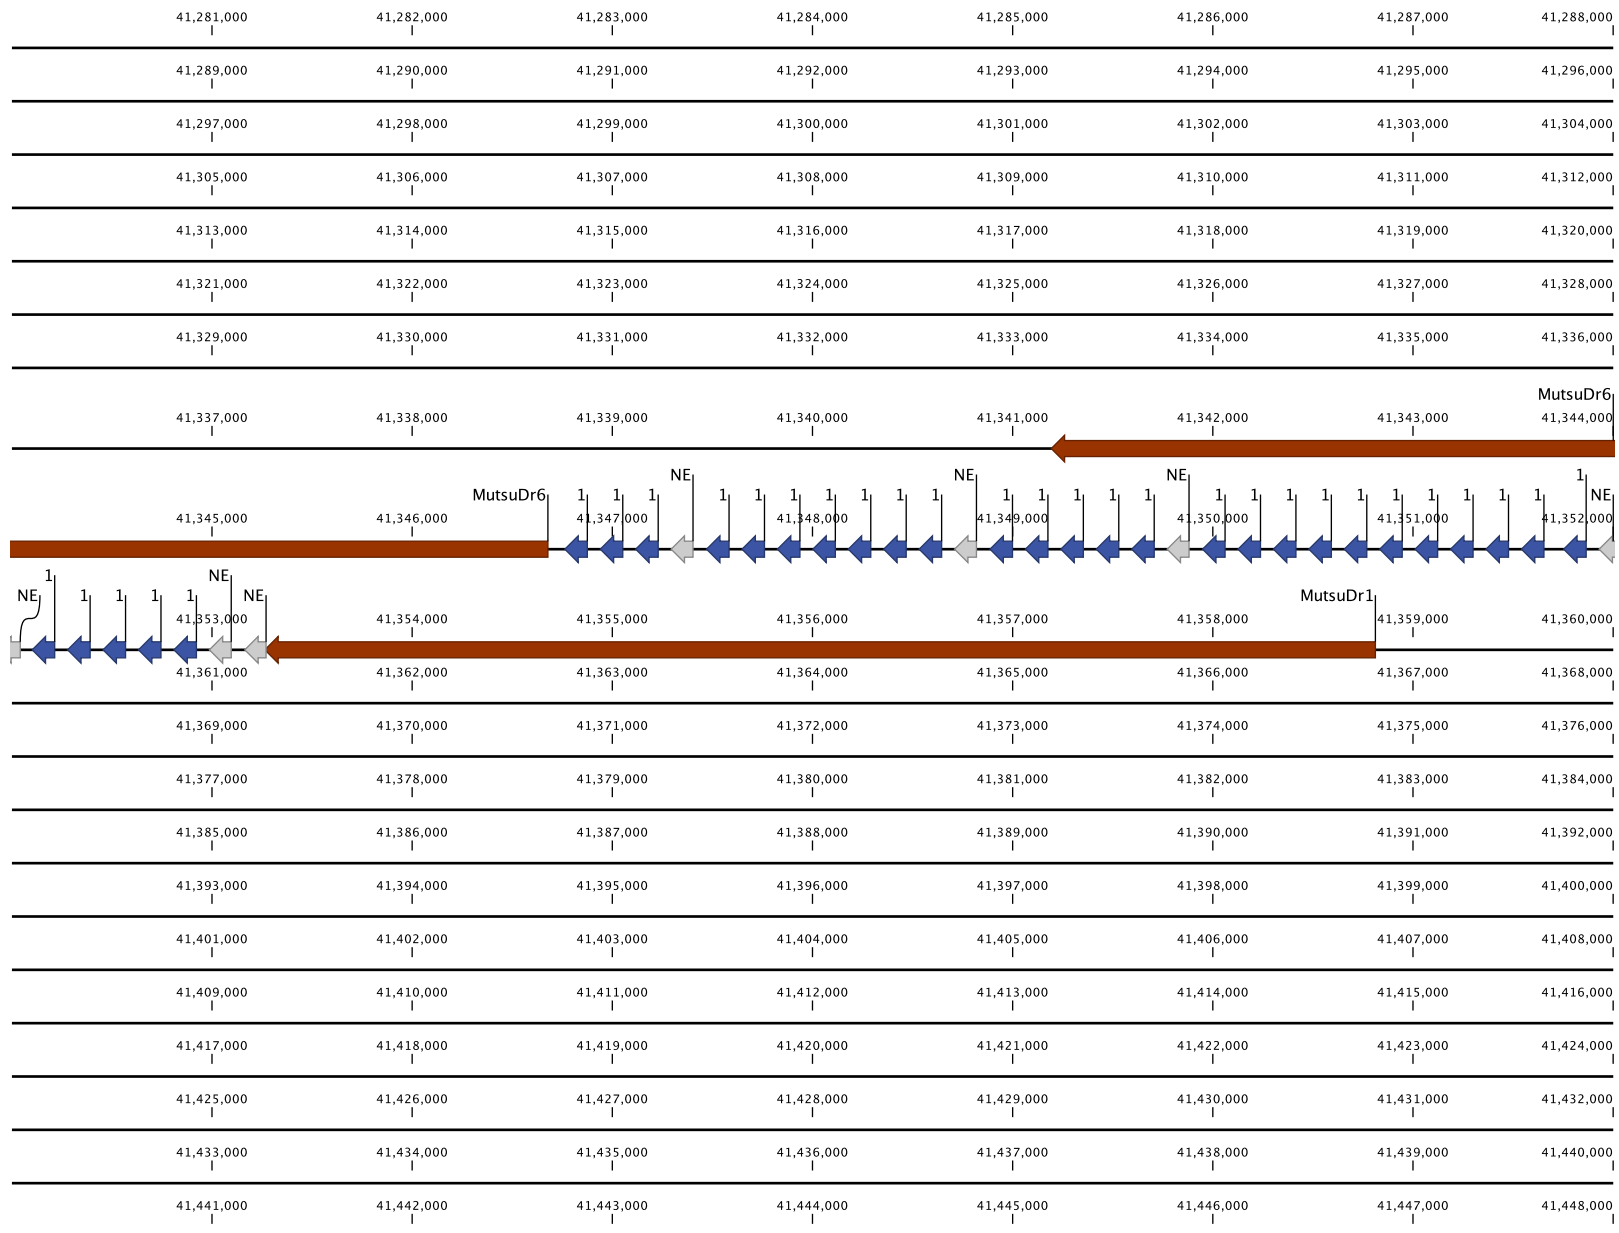

Supplemental Figure S8

|            |            |            |            |            |            |            |            |
|------------|------------|------------|------------|------------|------------|------------|------------|
| 41,449,000 | 41,450,000 | 41,451,000 | 41,452,000 | 41,453,000 | 41,454,000 | 41,455,000 | 41,456,000 |
| 41,457,000 | 41,458,000 | 41,459,000 | 41,460,000 | 41,461,000 | 41,462,000 | 41,463,000 | 41,464,000 |
| 41,465,000 | 41,466,000 | 41,467,000 | 41,468,000 | 41,469,000 | 41,470,000 | 41,471,000 | 41,472,000 |
| 41,473,000 | 41,474,000 | 41,475,000 | 41,476,000 | 41,477,000 | 41,478,000 | 41,479,000 | 41,480,000 |
| 41,481,000 | 41,482,000 | 41,483,000 | 41,484,000 | 41,485,000 | 41,486,000 | 41,487,000 | 41,488,000 |
| 41,489,000 | 41,490,000 | 41,491,000 | 41,492,000 | 41,493,000 | 41,494,000 | 41,495,000 | 41,496,000 |
| 41,497,000 | 41,498,000 | 41,499,000 | 41,500,000 | 41,501,000 | 41,502,000 | 41,503,000 | 41,504,000 |
| 41,505,000 | 41,506,000 | 41,507,000 | 41,508,000 | 41,509,000 | 41,510,000 | 41,511,000 | 41,512,000 |
| 41,513,000 | 41,514,000 | 41,515,000 | 41,516,000 | 41,517,000 | 41,518,000 | 41,519,000 | 41,520,000 |
| 41,521,000 | 41,522,000 | 41,523,000 | 41,524,000 | 41,525,000 | 41,526,000 | 41,527,000 | 41,528,000 |
| 41,529,000 | 41,530,000 | 41,531,000 | 41,532,000 | 41,533,000 | 41,534,000 | 41,535,000 | 41,536,000 |
| 41,537,000 | 41,538,000 | 41,539,000 | 41,540,000 | 41,541,000 | 41,542,000 | 41,543,000 | 41,544,000 |
| 41,545,000 | 41,546,000 | 41,547,000 | 41,548,000 | 41,549,000 | 41,550,000 | 41,551,000 | 41,552,000 |
| 41,553,000 | 41,554,000 | 41,555,000 | 41,556,000 | 41,557,000 | 41,558,000 | 41,559,000 | 41,560,000 |
| 41,561,000 | 41,562,000 | 41,563,000 | 41,564,000 | 41,565,000 | 41,566,000 | 41,567,000 | 41,568,000 |
| 41,569,000 | 41,570,000 | 41,571,000 | 41,572,000 | 41,573,000 | 41,574,000 | 41,575,000 | 41,576,000 |
| 41,577,000 | 41,578,000 | 41,579,000 | 41,580,000 | 41,581,000 | 41,582,000 | 41,583,000 | 41,584,000 |
| 41,585,000 | 41,586,000 | 41,587,000 | 41,588,000 | 41,589,000 | 41,590,000 | 41,591,000 | 41,592,000 |
| 41,593,000 | 41,594,000 | 41,595,000 | 41,596,000 | 41,597,000 | 41,598,000 | 41,599,000 | 41,600,000 |
| 41,601,000 | 41,602,000 | 41,603,000 | 41,604,000 | 41,605,000 | 41,606,000 | 41,607,000 | 41,608,000 |
| 41,609,000 | 41,610,000 | 41,611,000 | 41,612,000 | 41,613,000 | 41,614,000 | 41,615,000 | 41,616,000 |
| 41,617,000 | 41,618,000 | 41,619,000 | 41,620,000 | 41,621,000 | 41,622,000 | 41,623,000 | 41,624,000 |
| 41,625,000 | 41,626,000 | 41,627,000 | 41,628,000 | 41,629,000 | 41,630,000 | 41,631,000 | 41,632,000 |

Supplemental Figure S8

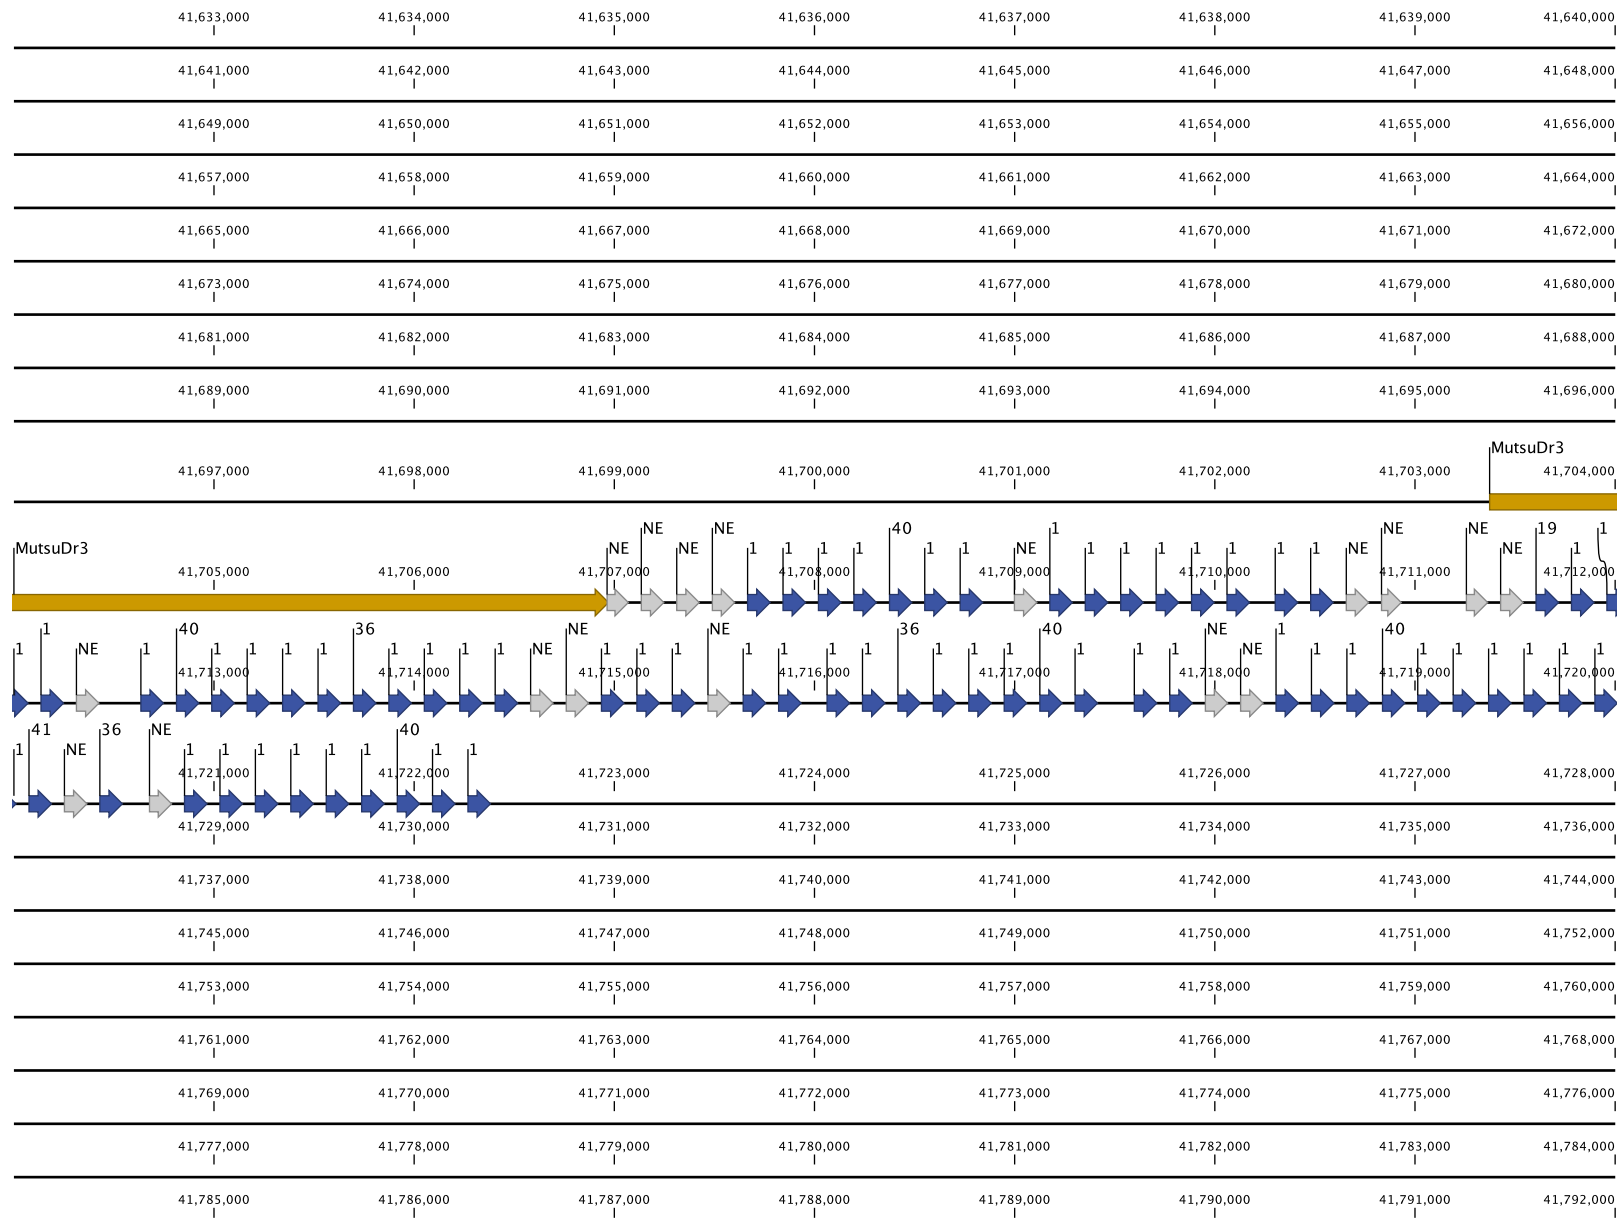

Supplemental Figure S8

|            |            |            |            |            |            |            |            |
|------------|------------|------------|------------|------------|------------|------------|------------|
| 41,793,000 | 41,794,000 | 41,795,000 | 41,796,000 | 41,797,000 | 41,798,000 | 41,799,000 | 41,800,000 |
| 41,801,000 | 41,802,000 | 41,803,000 | 41,804,000 | 41,805,000 | 41,806,000 | 41,807,000 | 41,808,000 |
| 41,809,000 | 41,810,000 | 41,811,000 | 41,812,000 | 41,813,000 | 41,814,000 | 41,815,000 | 41,816,000 |
| 41,817,000 | 41,818,000 | 41,819,000 | 41,820,000 | 41,821,000 | 41,822,000 | 41,823,000 | 41,824,000 |
| 41,825,000 | 41,826,000 | 41,827,000 | 41,828,000 | 41,829,000 | 41,830,000 | 41,831,000 | 41,832,000 |
| 41,833,000 | 41,834,000 | 41,835,000 | 41,836,000 | 41,837,000 | 41,838,000 | 41,839,000 | 41,840,000 |
| 41,841,000 | 41,842,000 | 41,843,000 | 41,844,000 | 41,845,000 | 41,846,000 | 41,847,000 | 41,848,000 |
| 41,849,000 | 41,850,000 | 41,851,000 | 41,852,000 | 41,853,000 | 41,854,000 | 41,855,000 | 41,856,000 |
| 41,857,000 | 41,858,000 | 41,859,000 | 41,860,000 | 41,861,000 | 41,862,000 | 41,863,000 | 41,864,000 |
| 41,865,000 | 41,866,000 | 41,867,000 | 41,868,000 | 41,869,000 | 41,870,000 | 41,871,000 | 41,872,000 |
| 41,873,000 | 41,874,000 | 41,875,000 | 41,876,000 | 41,877,000 | 41,878,000 | 41,879,000 | 41,880,000 |
| 41,881,000 | 41,882,000 | 41,883,000 | 41,884,000 | 41,885,000 | 41,886,000 | 41,887,000 | 41,888,000 |
| 41,889,000 | 41,890,000 | 41,891,000 | 41,892,000 | 41,893,000 | 41,894,000 | 41,895,000 | 41,896,000 |
| 41,897,000 | 41,898,000 | 41,899,000 | 41,900,000 | 41,901,000 | 41,902,000 | 41,903,000 | 41,904,000 |
| 41,905,000 | 41,906,000 | 41,907,000 | 41,908,000 | 41,909,000 | 41,910,000 | 41,911,000 | 41,912,000 |
| 41,913,000 | 41,914,000 | 41,915,000 | 41,916,000 | 41,917,000 | 41,918,000 | 41,919,000 | 41,920,000 |
| 41,921,000 | 41,922,000 | 41,923,000 | 41,924,000 | 41,925,000 | 41,926,000 | 41,927,000 | 41,928,000 |
| 41,929,000 | 41,930,000 | 41,931,000 | 41,932,000 | 41,933,000 | 41,934,000 | 41,935,000 | 41,936,000 |
| 41,937,000 | 41,938,000 | 41,939,000 | 41,940,000 | 41,941,000 | 41,942,000 | 41,943,000 | 41,944,000 |
| 41,945,000 | 41,946,000 | 41,947,000 | 41,948,000 | 41,949,000 | 41,950,000 | 41,951,000 | 41,952,000 |
| 41,953,000 | 41,954,000 | 41,955,000 | 41,956,000 | 41,957,000 | 41,958,000 | 41,959,000 | 41,960,000 |
| 41,961,000 | 41,962,000 | 41,963,000 | 41,964,000 | 41,965,000 | 41,966,000 | 41,967,000 | 41,968,000 |
| 41,969,000 | 41,970,000 | 41,971,000 | 41,972,000 | 41,973,000 | 41,974,000 | 41,975,000 | 41,976,000 |

Supplemental Figure S8

|            |            |            |            |            |            |            |            |
|------------|------------|------------|------------|------------|------------|------------|------------|
| 41,977,000 | 41,978,000 | 41,979,000 | 41,980,000 | 41,981,000 | 41,982,000 | 41,983,000 | 41,984,000 |
| 41,985,000 | 41,986,000 | 41,987,000 | 41,988,000 | 41,989,000 | 41,990,000 | 41,991,000 | 41,992,000 |
| 41,993,000 | 41,994,000 | 41,995,000 | 41,996,000 | 41,997,000 | 41,998,000 | 41,999,000 | 42,000,000 |
| 42,001,000 | 42,002,000 | 42,003,000 | 42,004,000 | 42,005,000 | 42,006,000 | 42,007,000 | 42,008,000 |
| 42,009,000 | 42,010,000 | 42,011,000 | 42,012,000 | 42,013,000 | 42,014,000 | 42,015,000 | 42,016,000 |
| 42,017,000 | 42,018,000 | 42,019,000 | 42,020,000 | 42,021,000 | 42,022,000 | 42,023,000 | 42,024,000 |
| 42,025,000 | 42,026,000 | 42,027,000 | 42,028,000 | 42,029,000 | 42,030,000 | 42,031,000 | 42,032,000 |
| 42,033,000 | 42,034,000 | 42,035,000 | 42,036,000 | 42,037,000 | 42,038,000 | 42,039,000 | 42,040,000 |
| 42,041,000 | 42,042,000 | 42,043,000 | 42,044,000 | 42,045,000 | 42,046,000 | 42,047,000 | 42,048,000 |
| 42,049,000 | 42,050,000 | 42,051,000 | 42,052,000 | 42,053,000 | 42,054,000 | 42,055,000 | 42,056,000 |
| 42,057,000 | 42,058,000 | 42,059,000 | 42,060,000 | 42,061,000 | 42,062,000 | 42,063,000 | 42,064,000 |
| 42,065,000 | 42,066,000 | 42,067,000 | 42,068,000 | 42,069,000 | 42,070,000 | 42,071,000 | 42,072,000 |
| 42,073,000 | 42,074,000 | 42,075,000 | 42,076,000 | 42,077,000 | 42,078,000 | 42,079,000 | 42,080,000 |
| 42,081,000 | 42,082,000 | 42,083,000 | 42,084,000 | 42,085,000 | 42,086,000 | 42,087,000 | 42,088,000 |
| 42,089,000 | 42,090,000 | 42,091,000 | 42,092,000 | 42,093,000 | 42,094,000 | 42,095,000 | 42,096,000 |
| 42,097,000 | 42,098,000 | 42,099,000 | 42,100,000 | 42,101,000 | 42,102,000 | 42,103,000 | 42,104,000 |
| 42,105,000 | 42,106,000 | 42,107,000 | 42,108,000 | 42,109,000 | 42,110,000 | 42,111,000 | 42,112,000 |
| 42,113,000 | 42,114,000 | 42,115,000 | 42,116,000 | 42,117,000 | 42,118,000 | 42,119,000 | 42,120,000 |
| 42,121,000 | 42,122,000 | 42,123,000 | 42,124,000 | 42,125,000 | 42,126,000 | 42,127,000 | 42,128,000 |
| 42,129,000 | 42,130,000 | 42,131,000 | 42,132,000 | 42,133,000 | 42,134,000 | 42,135,000 | 42,136,000 |
| 42,137,000 | 42,138,000 | 42,139,000 | 42,140,000 | 42,141,000 | 42,142,000 | 42,143,000 | 42,144,000 |
| 42,145,000 | 42,146,000 | 42,147,000 | 42,148,000 | 42,149,000 | 42,150,000 | 42,151,000 | 42,152,000 |
| 42,153,000 | 42,154,000 | 42,155,000 | 42,156,000 | 42,157,000 | 42,158,000 | 42,159,000 | 42,160,000 |

Supplemental Figure S8

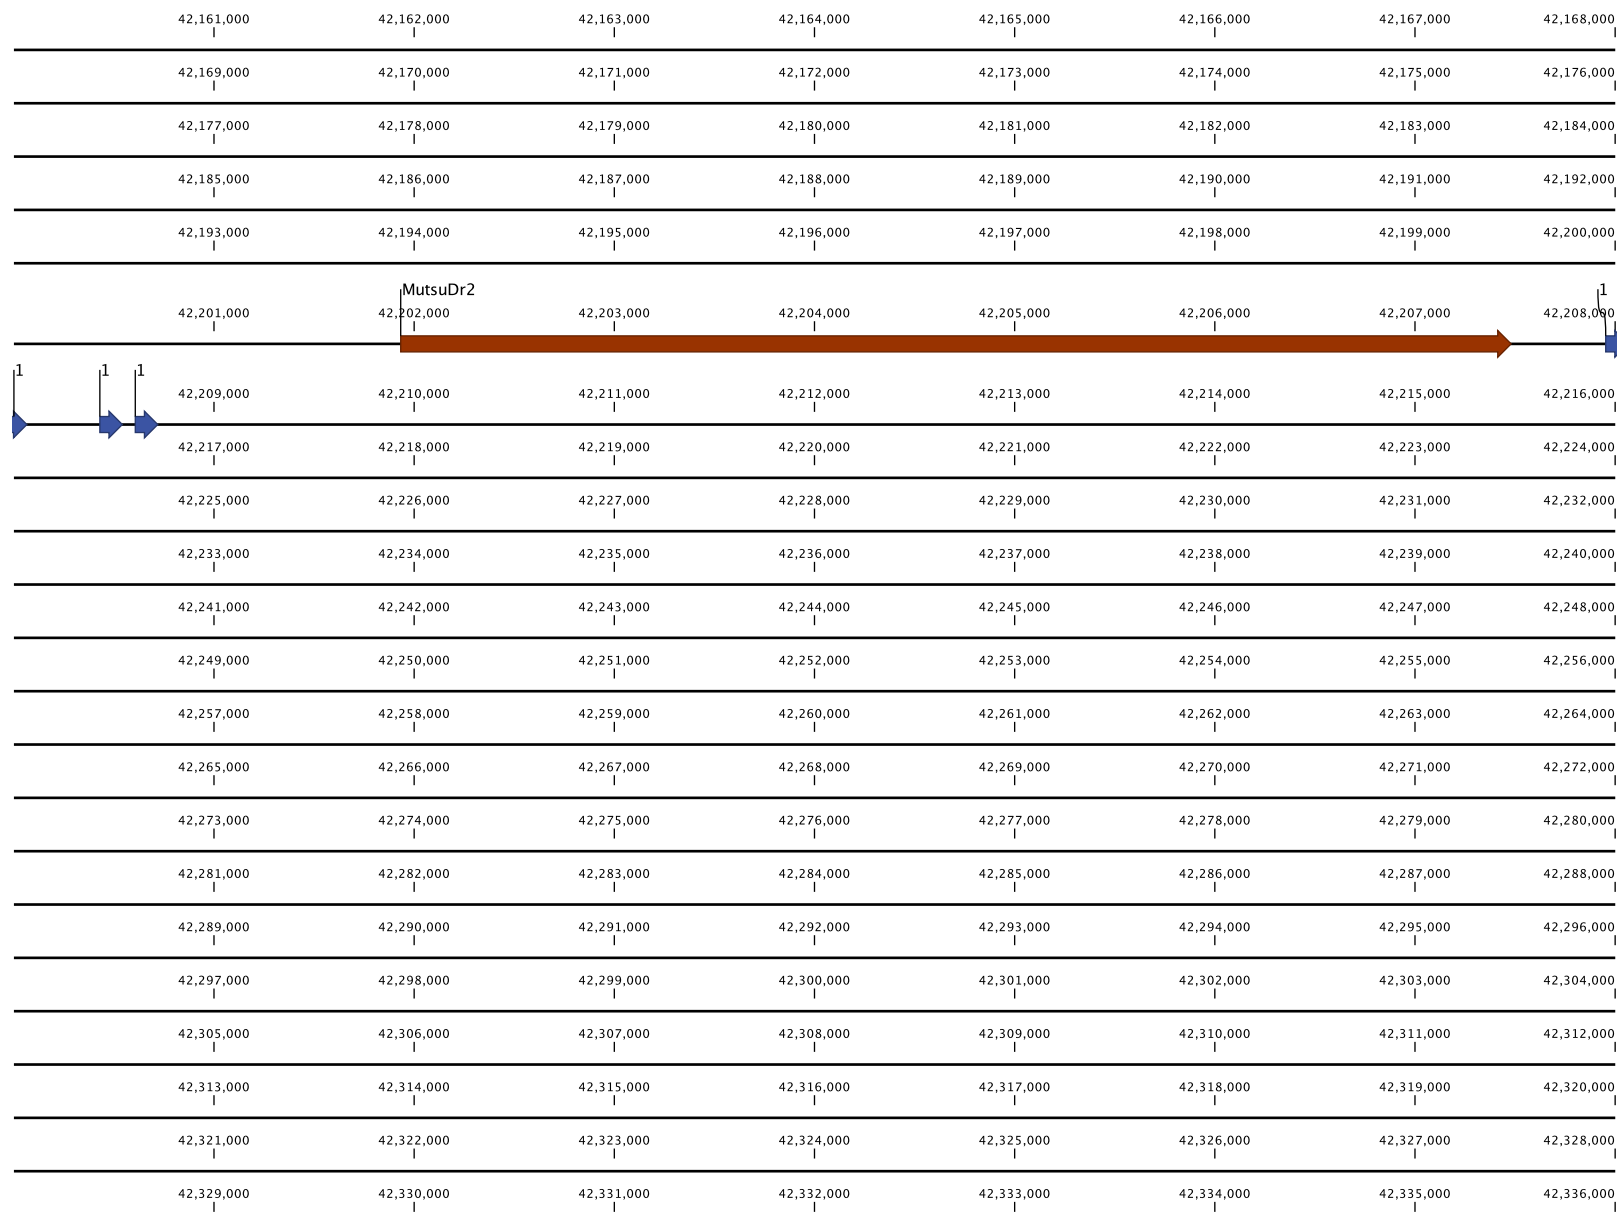



Supplemental Figure S8

|            |            |            |            |            |            |            |            |
|------------|------------|------------|------------|------------|------------|------------|------------|
| 42,337,000 | 42,338,000 | 42,339,000 | 42,340,000 | 42,341,000 | 42,342,000 | 42,343,000 | 42,344,000 |
| 42,345,000 | 42,346,000 | 42,347,000 | 42,348,000 | 42,349,000 | 42,350,000 | 42,351,000 | 42,352,000 |
| 42,353,000 | 42,354,000 | 42,355,000 | 42,356,000 | 42,357,000 | 42,358,000 | 42,359,000 | 42,360,000 |
| 42,361,000 | 42,362,000 | 42,363,000 | 42,364,000 | 42,365,000 | 42,366,000 | 42,367,000 | 42,368,000 |
| 42,369,000 | 42,370,000 | 42,371,000 | 42,372,000 | 42,373,000 | 42,374,000 | 42,375,000 | 42,376,000 |
| 42,377,000 | 42,378,000 | 42,379,000 | 42,380,000 | 42,381,000 | 42,382,000 | 42,383,000 | 42,384,000 |
| 42,385,000 | 42,386,000 | 42,387,000 | 42,388,000 | 42,389,000 | 42,390,000 | 42,391,000 | 42,392,000 |
| 42,393,000 | 42,394,000 | 42,395,000 | 42,396,000 | 42,397,000 | 42,398,000 | 42,399,000 | 42,400,000 |
| 42,401,000 | 42,402,000 | 42,403,000 | 42,404,000 | 42,405,000 | 42,406,000 | 42,407,000 | 42,408,000 |
| 42,409,000 | 42,410,000 | 42,411,000 | 42,412,000 | 42,413,000 | 42,414,000 | 42,415,000 | 42,416,000 |
| 42,417,000 | 42,418,000 | 42,419,000 | 42,420,000 | 42,421,000 | 42,422,000 | 42,423,000 | 42,424,000 |
| 42,425,000 | 42,426,000 | 42,427,000 | 42,428,000 | 42,429,000 | 42,430,000 | 42,431,000 | 42,432,000 |
| 42,433,000 | 42,434,000 | 42,435,000 | 42,436,000 | 42,437,000 | 42,438,000 | 42,439,000 | 42,440,000 |
| 42,441,000 | 42,442,000 | 42,443,000 | 42,444,000 | 42,445,000 | 42,446,000 | 42,447,000 | 42,448,000 |
| 42,449,000 | 42,450,000 | 42,451,000 | 42,452,000 | 42,453,000 | 42,454,000 | 42,455,000 | 42,456,000 |
| 42,457,000 | 42,458,000 | 42,459,000 | 42,460,000 | 42,461,000 | 42,462,000 | 42,463,000 | 42,464,000 |
| 42,465,000 | 42,466,000 | 42,467,000 | 42,468,000 | 42,469,000 | 42,470,000 | 42,471,000 | 42,472,000 |
| 42,473,000 | 42,474,000 | 42,475,000 | 42,476,000 | 42,477,000 | 42,478,000 | 42,479,000 | 42,480,000 |
| 42,481,000 | 42,482,000 | 42,483,000 | 42,484,000 | 42,485,000 | 42,486,000 | 42,487,000 | 42,488,000 |
| 42,489,000 | 42,490,000 | 42,491,000 | 42,492,000 | 42,493,000 | 42,494,000 | 42,495,000 | 42,496,000 |
| 42,497,000 | 42,498,000 | 42,499,000 | 42,500,000 | 42,501,000 | 42,502,000 | 42,503,000 | 42,504,000 |
| 42,505,000 | 42,506,000 | 42,507,000 | 42,508,000 | 42,509,000 | 42,510,000 | 42,511,000 | 42,512,000 |
| 42,513,000 | 42,514,000 | 42,515,000 | 42,516,000 | 42,517,000 | 42,518,000 | 42,519,000 | 42,520,000 |

Supplemental Figure S8

|            |            |            |            |            |            |            |            |
|------------|------------|------------|------------|------------|------------|------------|------------|
| 42,521,000 | 42,522,000 | 42,523,000 | 42,524,000 | 42,525,000 | 42,526,000 | 42,527,000 | 42,528,000 |
| 42,529,000 | 42,530,000 | 42,531,000 | 42,532,000 | 42,533,000 | 42,534,000 | 42,535,000 | 42,536,000 |
| 42,537,000 | 42,538,000 | 42,539,000 | 42,540,000 | 42,541,000 | 42,542,000 | 42,543,000 | 42,544,000 |
| 42,545,000 | 42,546,000 | 42,547,000 | 42,548,000 | 42,549,000 | 42,550,000 | 42,551,000 | 42,552,000 |
| 42,553,000 | 42,554,000 | 42,555,000 | 42,556,000 | 42,557,000 | 42,558,000 | 42,559,000 | 42,560,000 |
| 42,561,000 | 42,562,000 | 42,563,000 | 42,564,000 | 42,565,000 | 42,566,000 | 42,567,000 | 42,568,000 |
| 42,569,000 | 42,570,000 | 42,571,000 | 42,572,000 | 42,573,000 | 42,574,000 | 42,575,000 | 42,576,000 |
| 42,577,000 | 42,578,000 | 42,579,000 | 42,580,000 | 42,581,000 | 42,582,000 | 42,583,000 | 42,584,000 |
| 42,585,000 | 42,586,000 | 42,587,000 | 42,588,000 | 42,589,000 | 42,590,000 | 42,591,000 | 42,592,000 |
| 42,593,000 | 42,594,000 | 42,595,000 | 42,596,000 | 42,597,000 | 42,598,000 | 42,599,000 | 42,600,000 |
| 42,601,000 | 42,602,000 | 42,603,000 | 42,604,000 | 42,605,000 | 42,606,000 | 42,607,000 | 42,608,000 |
| 42,609,000 | 42,610,000 | 42,611,000 | 42,612,000 | 42,613,000 | 42,614,000 | 42,615,000 | 42,616,000 |
| 42,617,000 | 42,618,000 | 42,619,000 | 42,620,000 | 42,621,000 | 42,622,000 | 42,623,000 | 42,624,000 |
| 42,625,000 | 42,626,000 | 42,627,000 | 42,628,000 | 42,629,000 | 42,630,000 | 42,631,000 | 42,632,000 |
| 42,633,000 | 42,634,000 | 42,635,000 | 42,636,000 | 42,637,000 | 42,638,000 | 42,639,000 | 42,640,000 |
| 42,641,000 | 42,642,000 | 42,643,000 | 42,644,000 | 42,645,000 | 42,646,000 | 42,647,000 | 42,648,000 |
| 42,649,000 | 42,650,000 | 42,651,000 | 42,652,000 | 42,653,000 | 42,654,000 | 42,655,000 | 42,656,000 |
| 42,657,000 | 42,658,000 | 42,659,000 | 42,660,000 | 42,661,000 | 42,662,000 | 42,663,000 | 42,664,000 |
| 42,665,000 | 42,666,000 | 42,667,000 | 42,668,000 | 42,669,000 | 42,670,000 | 42,671,000 | 42,672,000 |
| 42,673,000 | 42,674,000 | 42,675,000 | 42,676,000 | 42,677,000 | 42,678,000 | 42,679,000 | 42,680,000 |
| 42,681,000 | 42,682,000 | 42,683,000 | 42,684,000 | 42,685,000 | 42,686,000 | 42,687,000 | 42,688,000 |
| 42,689,000 | 42,690,000 | 42,691,000 | 42,692,000 | 42,693,000 | 42,694,000 | 42,695,000 | 42,696,000 |
| 42,697,000 | 42,698,000 | 42,699,000 | 42,700,000 | 42,701,000 | 42,702,000 | 42,703,000 | 42,704,000 |

Supplemental Figure S8

|            |            |            |            |            |            |            |            |
|------------|------------|------------|------------|------------|------------|------------|------------|
| 42,705,000 | 42,706,000 | 42,707,000 | 42,708,000 | 42,709,000 | 42,710,000 | 42,711,000 | 42,712,000 |
| 42,713,000 | 42,714,000 | 42,715,000 | 42,716,000 | 42,717,000 | 42,718,000 | 42,719,000 | 42,720,000 |
| 42,721,000 | 42,722,000 | 42,723,000 | 42,724,000 | 42,725,000 | 42,726,000 | 42,727,000 | 42,728,000 |
| 42,729,000 | 42,730,000 | 42,731,000 | 42,732,000 | 42,733,000 | 42,734,000 | 42,735,000 | 42,736,000 |
| 42,737,000 | 42,738,000 | 42,739,000 | 42,740,000 | 42,741,000 | 42,742,000 | 42,743,000 | 42,744,000 |
| 42,745,000 | 42,746,000 | 42,747,000 | 42,748,000 | 42,749,000 | 42,750,000 | 42,751,000 | 42,752,000 |
| 42,753,000 | 42,754,000 | 42,755,000 | 42,756,000 | 42,757,000 | 42,758,000 | 42,759,000 | 42,760,000 |
| 42,761,000 | 42,762,000 | 42,763,000 | 42,764,000 | 42,765,000 | 42,766,000 | 42,767,000 | 42,768,000 |
| 42,769,000 | 42,770,000 | 42,771,000 | 42,772,000 | 42,773,000 | 42,774,000 | 42,775,000 | 42,776,000 |
| 42,777,000 | 42,778,000 | 42,779,000 | 42,780,000 | 42,781,000 | 42,782,000 | 42,783,000 | 42,784,000 |
| 42,785,000 | 42,786,000 | 42,787,000 | 42,788,000 | 42,789,000 | 42,790,000 | 42,791,000 | 42,792,000 |
| 42,793,000 | 42,794,000 | 42,795,000 | 42,796,000 | 42,797,000 | 42,798,000 | 42,799,000 | 42,800,000 |
| 42,801,000 | 42,802,000 | 42,803,000 | 42,804,000 | 42,805,000 | 42,806,000 | 42,807,000 | 42,808,000 |
| 42,809,000 | 42,810,000 | 42,811,000 | 42,812,000 | 42,813,000 | 42,814,000 | 42,815,000 | 42,816,000 |
| 42,817,000 | 42,818,000 | 42,819,000 | 42,820,000 | 42,821,000 | 42,822,000 | 42,823,000 | 42,824,000 |
| 42,825,000 | 42,826,000 | 42,827,000 | 42,828,000 | 42,829,000 | 42,830,000 | 42,831,000 | 42,832,000 |
| 42,833,000 | 42,834,000 | 42,835,000 | 42,836,000 | 42,837,000 | 42,838,000 | 42,839,000 | 42,840,000 |
| 42,841,000 | 42,842,000 | 42,843,000 | 42,844,000 | 42,845,000 | 42,846,000 | 42,847,000 | 42,848,000 |
| 42,849,000 | 42,850,000 | 42,851,000 | 42,852,000 | 42,853,000 | 42,854,000 | 42,855,000 | 42,856,000 |
| 42,857,000 | 42,858,000 | 42,859,000 | 42,860,000 | 42,861,000 | 42,862,000 | 42,863,000 | 42,864,000 |
| 42,865,000 | 42,866,000 | 42,867,000 | 42,868,000 | 42,869,000 | 42,870,000 | 42,871,000 | 42,872,000 |
| 42,873,000 | 42,874,000 | 42,875,000 | 42,876,000 | 42,877,000 | 42,878,000 | 42,879,000 | 42,880,000 |
| 42,881,000 | 42,882,000 | 42,883,000 | 42,884,000 | 42,885,000 | 42,886,000 | 42,887,000 | 42,888,000 |

Supplemental Figure S8

|            |            |            |            |            |            |            |            |
|------------|------------|------------|------------|------------|------------|------------|------------|
| 42,889,000 | 42,890,000 | 42,891,000 | 42,892,000 | 42,893,000 | 42,894,000 | 42,895,000 | 42,896,000 |
| 42,897,000 | 42,898,000 | 42,899,000 | 42,900,000 | 42,901,000 | 42,902,000 | 42,903,000 | 42,904,000 |
| 42,905,000 | 42,906,000 | 42,907,000 | 42,908,000 | 42,909,000 | 42,910,000 | 42,911,000 | 42,912,000 |
| 42,913,000 | 42,914,000 | 42,915,000 | 42,916,000 | 42,917,000 | 42,918,000 | 42,919,000 | 42,920,000 |
| 42,921,000 | 42,922,000 | 42,923,000 | 42,924,000 | 42,925,000 | 42,926,000 | 42,927,000 | 42,928,000 |
| 42,929,000 | 42,930,000 | 42,931,000 | 42,932,000 | 42,933,000 | 42,934,000 | 42,935,000 | 42,936,000 |
| 42,937,000 | 42,938,000 | 42,939,000 | 42,940,000 | 42,941,000 | 42,942,000 | 42,943,000 | 42,944,000 |
| 42,945,000 | 42,946,000 | 42,947,000 | 42,948,000 | 42,949,000 | 42,950,000 | 42,951,000 | 42,952,000 |
| 42,953,000 | 42,954,000 | 42,955,000 | 42,956,000 | 42,957,000 | 42,958,000 | 42,959,000 | 42,960,000 |
| 42,961,000 | 42,962,000 | 42,963,000 | 42,964,000 | 42,965,000 | 42,966,000 | 42,967,000 | 42,968,000 |
| 42,969,000 | 42,970,000 | 42,971,000 | 42,972,000 | 42,973,000 | 42,974,000 | 42,975,000 | 42,976,000 |
| 42,977,000 | 42,978,000 | 42,979,000 | 42,980,000 | 42,981,000 | 42,982,000 | 42,983,000 | 42,984,000 |
| 42,985,000 | 42,986,000 | 42,987,000 | 42,988,000 | 42,989,000 | 42,990,000 | 42,991,000 | 42,992,000 |
| 42,993,000 | 42,994,000 | 42,995,000 | 42,996,000 | 42,997,000 | 42,998,000 | 42,999,000 | 43,000,000 |
| 43,001,000 | 43,002,000 | 43,003,000 | 43,004,000 | 43,005,000 | 43,006,000 | 43,007,000 | 43,008,000 |
| 43,009,000 | 43,010,000 | 43,011,000 | 43,012,000 | 43,013,000 | 43,014,000 | 43,015,000 | 43,016,000 |
| 43,017,000 | 43,018,000 | 43,019,000 | 43,020,000 | 43,021,000 | 43,022,000 | 43,023,000 | 43,024,000 |
| 43,025,000 | 43,026,000 | 43,027,000 | 43,028,000 | 43,029,000 | 43,030,000 | 43,031,000 | 43,032,000 |
| 43,033,000 | 43,034,000 | 43,035,000 | 43,036,000 | 43,037,000 | 43,038,000 | 43,039,000 | 43,040,000 |
| 43,041,000 | 43,042,000 | 43,043,000 | 43,044,000 | 43,045,000 | 43,046,000 | 43,047,000 | 43,048,000 |
| 43,049,000 | 43,050,000 | 43,051,000 | 43,052,000 | 43,053,000 | 43,054,000 | 43,055,000 | 43,056,000 |
| 43,057,000 | 43,058,000 | 43,059,000 | 43,060,000 | 43,061,000 | 43,062,000 | 43,063,000 | 43,064,000 |
| 43,065,000 | 43,066,000 | 43,067,000 | 43,068,000 | 43,069,000 | 43,070,000 | 43,071,000 | 43,072,000 |

Supplemental Figure S8

|            |            |            |            |            |            |            |            |
|------------|------------|------------|------------|------------|------------|------------|------------|
| 43,073,000 | 43,074,000 | 43,075,000 | 43,076,000 | 43,077,000 | 43,078,000 | 43,079,000 | 43,080,000 |
| 43,081,000 | 43,082,000 | 43,083,000 | 43,084,000 | 43,085,000 | 43,086,000 | 43,087,000 | 43,088,000 |
| 43,089,000 | 43,090,000 | 43,091,000 | 43,092,000 | 43,093,000 | 43,094,000 | 43,095,000 | 43,096,000 |
| 43,097,000 | 43,098,000 | 43,099,000 | 43,100,000 | 43,101,000 | 43,102,000 | 43,103,000 | 43,104,000 |
| 43,105,000 | 43,106,000 | 43,107,000 | 43,108,000 | 43,109,000 | 43,110,000 | 43,111,000 | 43,112,000 |
| 43,113,000 | 43,114,000 | 43,115,000 | 43,116,000 | 43,117,000 | 43,118,000 | 43,119,000 | 43,120,000 |
| 43,121,000 | 43,122,000 | 43,123,000 | 43,124,000 | 43,125,000 | 43,126,000 | 43,127,000 | 43,128,000 |
| 43,129,000 | 43,130,000 | 43,131,000 | 43,132,000 | 43,133,000 | 43,134,000 | 43,135,000 | 43,136,000 |
| 43,137,000 | 43,138,000 | 43,139,000 | 43,140,000 | 43,141,000 | 43,142,000 | 43,143,000 | 43,144,000 |
| 43,145,000 | 43,146,000 | 43,147,000 | 43,148,000 | 43,149,000 | 43,150,000 | 43,151,000 | 43,152,000 |
| 43,153,000 | 43,154,000 | 43,155,000 | 43,156,000 | 43,157,000 | 43,158,000 | 43,159,000 | 43,160,000 |
| 43,161,000 | 43,162,000 | 43,163,000 | 43,164,000 | 43,165,000 | 43,166,000 | 43,167,000 | 43,168,000 |
| 43,169,000 | 43,170,000 | 43,171,000 | 43,172,000 | 43,173,000 | 43,174,000 | 43,175,000 | 43,176,000 |
| 43,177,000 | 43,178,000 | 43,179,000 | 43,180,000 | 43,181,000 | 43,182,000 | 43,183,000 | 43,184,000 |
| 43,185,000 | 43,186,000 | 43,187,000 | 43,188,000 | 43,189,000 | 43,190,000 | 43,191,000 | 43,192,000 |
| 43,193,000 | 43,194,000 | 43,195,000 | 43,196,000 | 43,197,000 | 43,198,000 | 43,199,000 | 43,200,000 |
| 43,201,000 | 43,202,000 | 43,203,000 | 43,204,000 | 43,205,000 | 43,206,000 | 43,207,000 | 43,208,000 |
| 43,209,000 | 43,210,000 | 43,211,000 | 43,212,000 | 43,213,000 | 43,214,000 | 43,215,000 | 43,216,000 |
| 43,217,000 | 43,218,000 | 43,219,000 | 43,220,000 | 43,221,000 | 43,222,000 | 43,223,000 | 43,224,000 |
| 43,225,000 | 43,226,000 | 43,227,000 | 43,228,000 | 43,229,000 | 43,230,000 | 43,231,000 | 43,232,000 |
| 43,233,000 | 43,234,000 | 43,235,000 | 43,236,000 | 43,237,000 | 43,238,000 | 43,239,000 | 43,240,000 |
| 43,241,000 | 43,242,000 | 43,243,000 | 43,244,000 | 43,245,000 | 43,246,000 | 43,247,000 | 43,248,000 |

Supplemental Figure S8

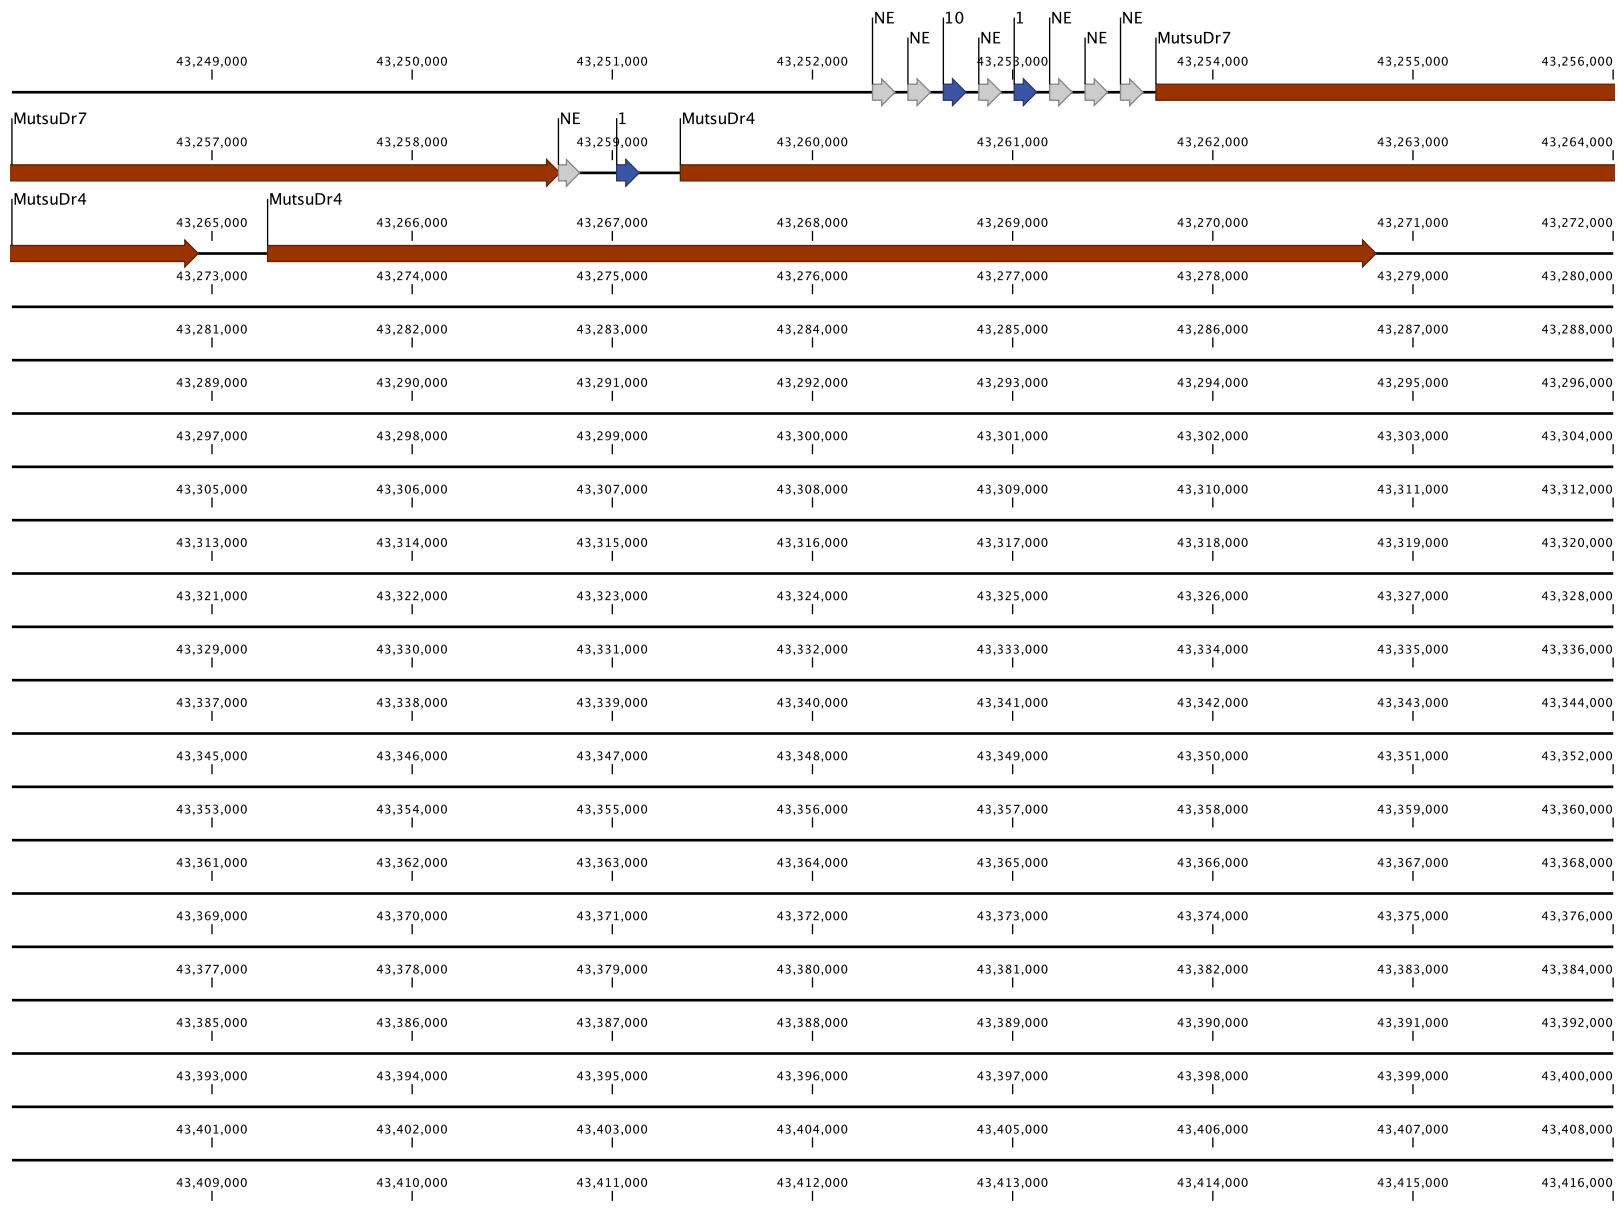

Supplemental Figure S8

|            |            |            |            |            |            |            |            |
|------------|------------|------------|------------|------------|------------|------------|------------|
| 43,417,000 | 43,418,000 | 43,419,000 | 43,420,000 | 43,421,000 | 43,422,000 | 43,423,000 | 43,424,000 |
| 43,425,000 | 43,426,000 | 43,427,000 | 43,428,000 | 43,429,000 | 43,430,000 | 43,431,000 | 43,432,000 |
| 43,433,000 | 43,434,000 | 43,435,000 | 43,436,000 | 43,437,000 | 43,438,000 | 43,439,000 | 43,440,000 |
| 43,441,000 | 43,442,000 | 43,443,000 | 43,444,000 | 43,445,000 | 43,446,000 | 43,447,000 | 43,448,000 |
| 43,449,000 | 43,450,000 | 43,451,000 | 43,452,000 | 43,453,000 | 43,454,000 | 43,455,000 | 43,456,000 |
| 43,457,000 | 43,458,000 | 43,459,000 | 43,460,000 | 43,461,000 | 43,462,000 | 43,463,000 | 43,464,000 |
| 43,465,000 | 43,466,000 | 43,467,000 | 43,468,000 | 43,469,000 | 43,470,000 | 43,471,000 | 43,472,000 |
| 43,473,000 | 43,474,000 | 43,475,000 | 43,476,000 | 43,477,000 | 43,478,000 | 43,479,000 | 43,480,000 |
| 43,481,000 | 43,482,000 | 43,483,000 | 43,484,000 | 43,485,000 | 43,486,000 | 43,487,000 | 43,488,000 |
| 43,489,000 | 43,490,000 | 43,491,000 | 43,492,000 | 43,493,000 | 43,494,000 | 43,495,000 | 43,496,000 |
| 43,497,000 | 43,498,000 | 43,499,000 | 43,500,000 | 43,501,000 | 43,502,000 | 43,503,000 | 43,504,000 |
| 43,505,000 | 43,506,000 | 43,507,000 | 43,508,000 | 43,509,000 | 43,510,000 | 43,511,000 | 43,512,000 |
| 43,513,000 | 43,514,000 | 43,515,000 | 43,516,000 | 43,517,000 | 43,518,000 | 43,519,000 | 43,520,000 |
| 43,521,000 | 43,522,000 | 43,523,000 | 43,524,000 | 43,525,000 | 43,526,000 | 43,527,000 | 43,528,000 |
| 43,529,000 | 43,530,000 | 43,531,000 | 43,532,000 | 43,533,000 | 43,534,000 | 43,535,000 | 43,536,000 |
| 43,537,000 | 43,538,000 | 43,539,000 | 43,540,000 | 43,541,000 | 43,542,000 | 43,543,000 | 43,544,000 |
| 43,545,000 | 43,546,000 | 43,547,000 | 43,548,000 | 43,549,000 | 43,550,000 | 43,551,000 | 43,552,000 |
| 43,553,000 | 43,554,000 | 43,555,000 | 43,556,000 | 43,557,000 | 43,558,000 | 43,559,000 | 43,560,000 |
| 43,561,000 | 43,562,000 | 43,563,000 | 43,564,000 | 43,565,000 | 43,566,000 | 43,567,000 | 43,568,000 |
| 43,569,000 | 43,570,000 | 43,571,000 | 43,572,000 | 43,573,000 | 43,574,000 | 43,575,000 | 43,576,000 |
| 43,577,000 | 43,578,000 | 43,579,000 | 43,580,000 | 43,581,000 | 43,582,000 | 43,583,000 | 43,584,000 |
| 43,585,000 | 43,586,000 | 43,587,000 | 43,588,000 | 43,589,000 | 43,590,000 | 43,591,000 | 43,592,000 |

NE

MutsuDr1

Supplemental Figure S8

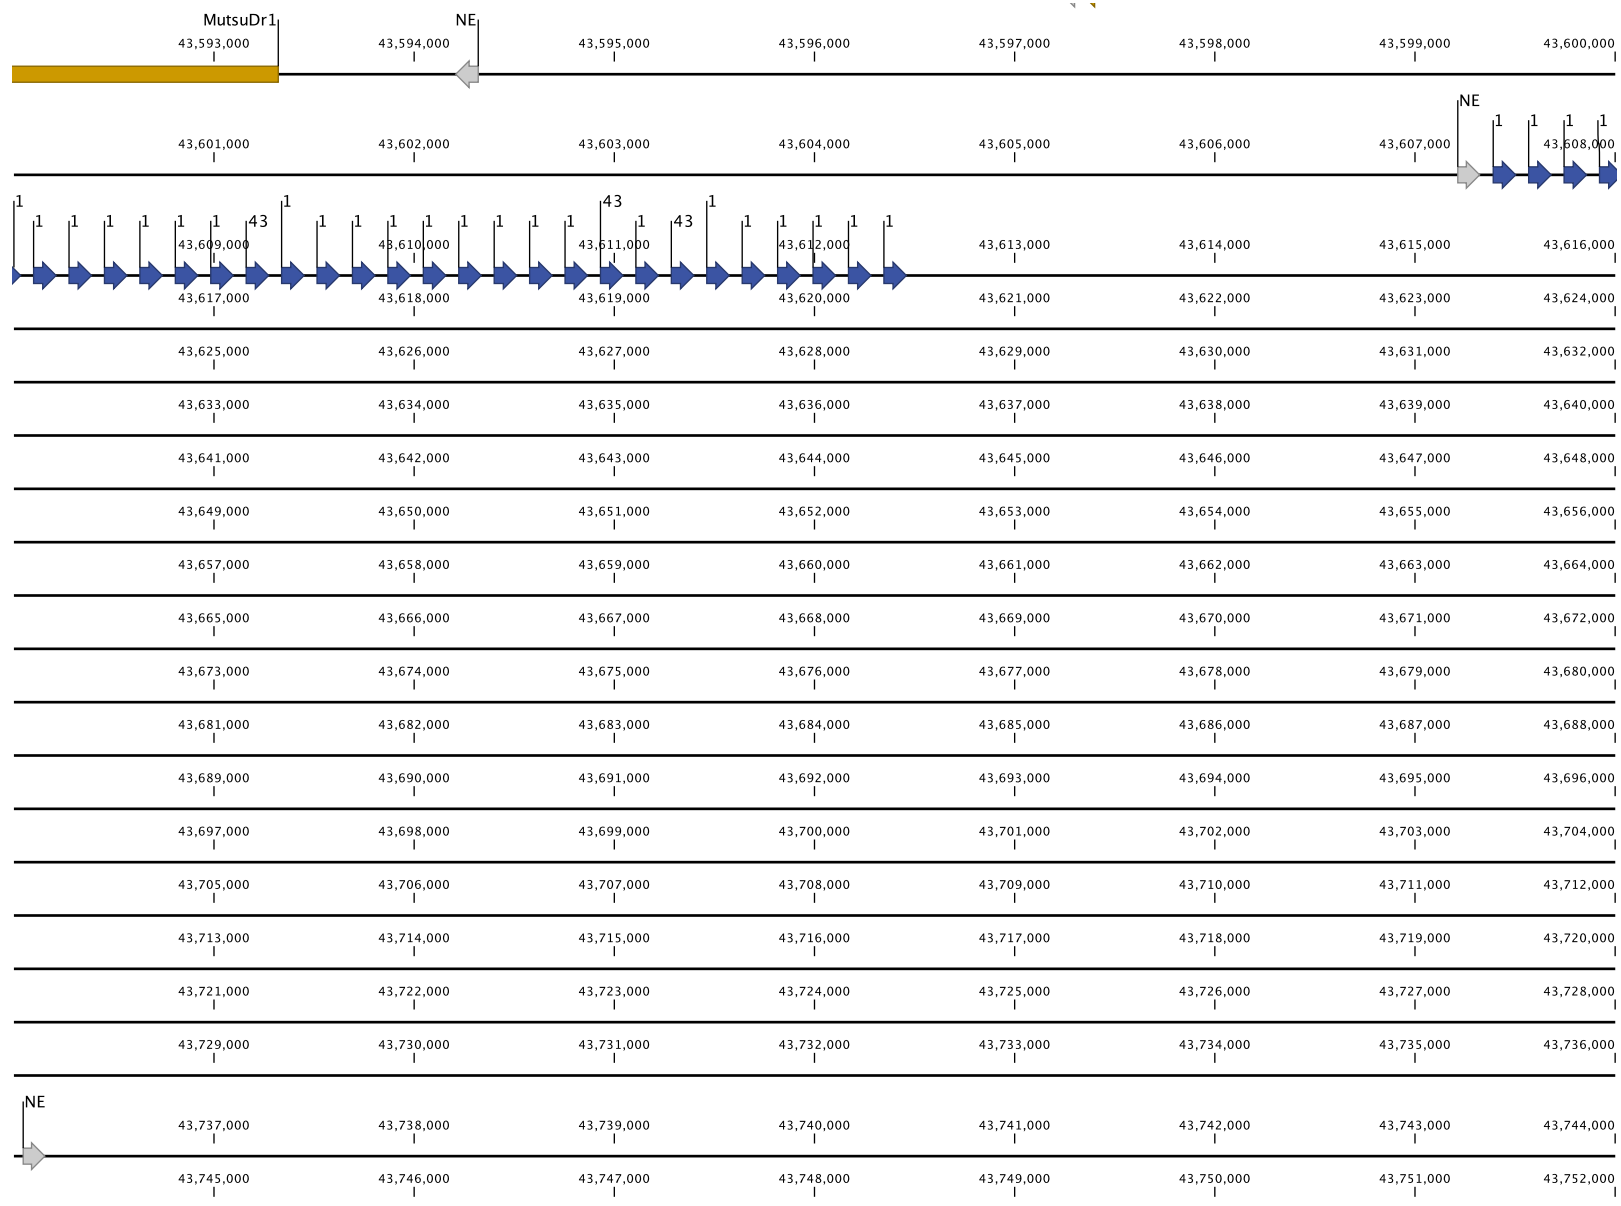



Supplemental Figure S8

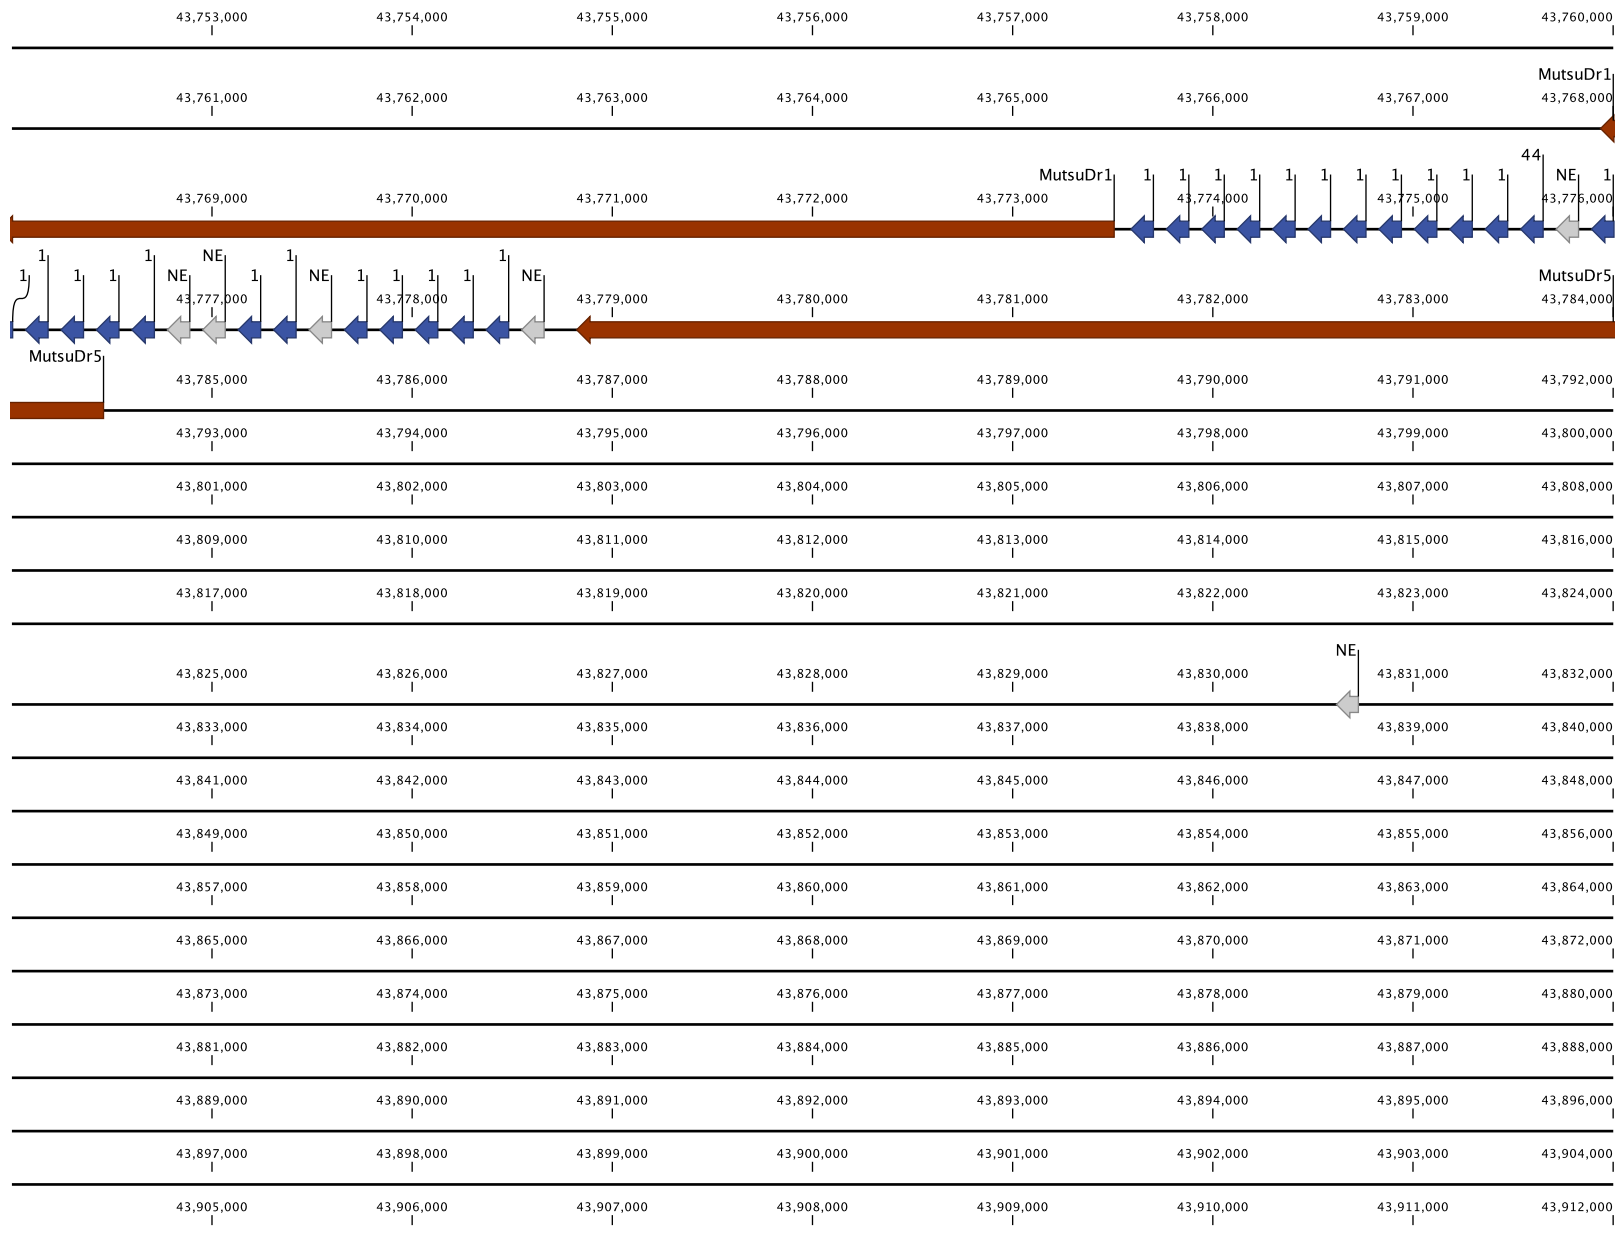

Supplemental Figure S8

|            |            |            |            |            |            |            |            |
|------------|------------|------------|------------|------------|------------|------------|------------|
| 43,913,000 | 43,914,000 | 43,915,000 | 43,916,000 | 43,917,000 | 43,918,000 | 43,919,000 | 43,920,000 |
| 43,921,000 | 43,922,000 | 43,923,000 | 43,924,000 | 43,925,000 | 43,926,000 | 43,927,000 | 43,928,000 |
| 43,929,000 | 43,930,000 | 43,931,000 | 43,932,000 | 43,933,000 | 43,934,000 | 43,935,000 | 43,936,000 |
| 43,937,000 | 43,938,000 | 43,939,000 | 43,940,000 | 43,941,000 | 43,942,000 | 43,943,000 | 43,944,000 |
| 43,945,000 | 43,946,000 | 43,947,000 | 43,948,000 | 43,949,000 | 43,950,000 | 43,951,000 | 43,952,000 |
| 43,953,000 | 43,954,000 | 43,955,000 | 43,956,000 | 43,957,000 | 43,958,000 | 43,959,000 | 43,960,000 |
| 43,961,000 | 43,962,000 | 43,963,000 | 43,964,000 | 43,965,000 | 43,966,000 | 43,967,000 | 43,968,000 |
| 43,969,000 | 43,970,000 | 43,971,000 | 43,972,000 | 43,973,000 | 43,974,000 | 43,975,000 | 43,976,000 |
| 43,977,000 | 43,978,000 | 43,979,000 | 43,980,000 | 43,981,000 | 43,982,000 | 43,983,000 | 43,984,000 |
| 43,985,000 | 43,986,000 | 43,987,000 | 43,988,000 | 43,989,000 | 43,990,000 | 43,991,000 | 43,992,000 |
| 43,993,000 | 43,994,000 | 43,995,000 | 43,996,000 | 43,997,000 | 43,998,000 | 43,999,000 | 44,000,000 |
| 44,001,000 | 44,002,000 | 44,003,000 | 44,004,000 | 44,005,000 | 44,006,000 | 44,007,000 | 44,008,000 |
| 44,009,000 | 44,010,000 | 44,011,000 | 44,012,000 | 44,013,000 | 44,014,000 | 44,015,000 | 44,016,000 |
| 44,017,000 | 44,018,000 | 44,019,000 | 44,020,000 | 44,021,000 | 44,022,000 | 44,023,000 | 44,024,000 |
| 44,025,000 | 44,026,000 | 44,027,000 | 44,028,000 | 44,029,000 | 44,030,000 | 44,031,000 | 44,032,000 |
| 44,033,000 | 44,034,000 | 44,035,000 | 44,036,000 | 44,037,000 | 44,038,000 | 44,039,000 | 44,040,000 |
| 44,041,000 | 44,042,000 | 44,043,000 | 44,044,000 | 44,045,000 | 44,046,000 | 44,047,000 | 44,048,000 |
| 44,049,000 | 44,050,000 | 44,051,000 | 44,052,000 | 44,053,000 | 44,054,000 | 44,055,000 | 44,056,000 |
| 44,057,000 | 44,058,000 | 44,059,000 | 44,060,000 | 44,061,000 | 44,062,000 | 44,063,000 | 44,064,000 |
| 44,065,000 | 44,066,000 | 44,067,000 | 44,068,000 | 44,069,000 | 44,070,000 | 44,071,000 | 44,072,000 |
| 44,073,000 | 44,074,000 | 44,075,000 | 44,076,000 | 44,077,000 | 44,078,000 | 44,079,000 | 44,080,000 |
| 44,081,000 | 44,082,000 | 44,083,000 | 44,084,000 | 44,085,000 | 44,086,000 | 44,087,000 | 44,088,000 |
| 44,089,000 | 44,090,000 | 44,091,000 | 44,092,000 | 44,093,000 | 44,094,000 | 44,095,000 | 44,096,000 |

Supplemental Figure S8

|            |            |            |            |            |            |            |            |
|------------|------------|------------|------------|------------|------------|------------|------------|
| 44,097,000 | 44,098,000 | 44,099,000 | 44,100,000 | 44,101,000 | 44,102,000 | 44,103,000 | 44,104,000 |
| 44,105,000 | 44,106,000 | 44,107,000 | 44,108,000 | 44,109,000 | 44,110,000 | 44,111,000 | 44,112,000 |
| 44,113,000 | 44,114,000 | 44,115,000 | 44,116,000 | 44,117,000 | 44,118,000 | 44,119,000 | 44,120,000 |
| 44,121,000 | 44,122,000 | 44,123,000 | 44,124,000 | 44,125,000 | 44,126,000 | 44,127,000 | 44,128,000 |
| 44,129,000 | 44,130,000 | 44,131,000 | 44,132,000 | 44,133,000 | 44,134,000 | 44,135,000 | 44,136,000 |
| 44,137,000 | 44,138,000 | 44,139,000 | 44,140,000 | 44,141,000 | 44,142,000 | 44,143,000 | 44,144,000 |
| 44,145,000 | 44,146,000 | 44,147,000 | 44,148,000 | 44,149,000 | 44,150,000 | 44,151,000 | 44,152,000 |
| 44,153,000 | 44,154,000 | 44,155,000 | 44,156,000 | 44,157,000 | 44,158,000 | 44,159,000 | 44,160,000 |
| 44,161,000 | 44,162,000 | 44,163,000 | 44,164,000 | 44,165,000 | 44,166,000 | 44,167,000 | 44,168,000 |
| 44,169,000 | 44,170,000 | 44,171,000 | 44,172,000 | 44,173,000 | 44,174,000 | 44,175,000 | 44,176,000 |
| 44,177,000 | 44,178,000 | 44,179,000 | 44,180,000 | 44,181,000 | 44,182,000 | 44,183,000 | 44,184,000 |
| 44,185,000 | 44,186,000 | 44,187,000 | 44,188,000 | 44,189,000 | 44,190,000 | 44,191,000 | 44,192,000 |
| 44,193,000 | 44,194,000 | 44,195,000 | 44,196,000 | 44,197,000 | 44,198,000 | 44,199,000 | 44,200,000 |
| 44,201,000 | 44,202,000 | 44,203,000 | 44,204,000 | 44,205,000 | 44,206,000 | 44,207,000 | 44,208,000 |
| 44,209,000 | 44,210,000 | 44,211,000 | 44,212,000 | 44,213,000 | 44,214,000 | 44,215,000 | 44,216,000 |
| 44,217,000 | 44,218,000 | 44,219,000 | 44,220,000 | 44,221,000 | 44,222,000 | 44,223,000 | 44,224,000 |
| 44,225,000 | 44,226,000 | 44,227,000 | 44,228,000 | 44,229,000 | 44,230,000 | 44,231,000 | 44,232,000 |
| 44,233,000 | 44,234,000 | 44,235,000 | 44,236,000 | 44,237,000 | 44,238,000 | 44,239,000 | 44,240,000 |
| 44,241,000 | 44,242,000 | 44,243,000 | 44,244,000 | 44,245,000 | 44,246,000 | 44,247,000 | 44,248,000 |
| 44,249,000 | 44,250,000 | 44,251,000 | 44,252,000 | 44,253,000 | 44,254,000 | 44,255,000 | 44,256,000 |
| 44,257,000 | 44,258,000 | 44,259,000 | 44,260,000 | 44,261,000 | 44,262,000 | 44,263,000 | 44,264,000 |
| 44,265,000 | 44,266,000 | 44,267,000 | 44,268,000 | 44,269,000 | 44,270,000 | 44,271,000 | 44,272,000 |
| 44,273,000 | 44,274,000 | 44,275,000 | 44,276,000 | 44,277,000 | 44,278,000 | 44,279,000 | 44,280,000 |

Supplemental Figure S8

|            |            |            |            |            |            |            |            |
|------------|------------|------------|------------|------------|------------|------------|------------|
| 44,281,000 | 44,282,000 | 44,283,000 | 44,284,000 | 44,285,000 | 44,286,000 | 44,287,000 | 44,288,000 |
| 44,289,000 | 44,290,000 | 44,291,000 | 44,292,000 | 44,293,000 | 44,294,000 | 44,295,000 | 44,296,000 |
| 44,297,000 | 44,298,000 | 44,299,000 | 44,300,000 | 44,301,000 | 44,302,000 | 44,303,000 | 44,304,000 |
| 44,305,000 | 44,306,000 | 44,307,000 | 44,308,000 | 44,309,000 | 44,310,000 | 44,311,000 | 44,312,000 |
| 44,313,000 | 44,314,000 | 44,315,000 | 44,316,000 | 44,317,000 | 44,318,000 | 44,319,000 | 44,320,000 |
| 44,321,000 | 44,322,000 | 44,323,000 | 44,324,000 | 44,325,000 | 44,326,000 | 44,327,000 | 44,328,000 |
| 44,329,000 | 44,330,000 | 44,331,000 | 44,332,000 | 44,333,000 | 44,334,000 | 44,335,000 | 44,336,000 |
| 44,337,000 | 44,338,000 | 44,339,000 | 44,340,000 | 44,341,000 | 44,342,000 | 44,343,000 | 44,344,000 |
| 44,345,000 | 44,346,000 | 44,347,000 | 44,348,000 | 44,349,000 | 44,350,000 | 44,351,000 | 44,352,000 |
| 44,353,000 | 44,354,000 | 44,355,000 | 44,356,000 | 44,357,000 | 44,358,000 | 44,359,000 | 44,360,000 |
| 44,361,000 | 44,362,000 | 44,363,000 | 44,364,000 | 44,365,000 | 44,366,000 | 44,367,000 | 44,368,000 |
| 44,369,000 | 44,370,000 | 44,371,000 | 44,372,000 | 44,373,000 | 44,374,000 | 44,375,000 | 44,376,000 |
| 44,377,000 | 44,378,000 | 44,379,000 | 44,380,000 | 44,381,000 | 44,382,000 | 44,383,000 | 44,384,000 |
| 44,385,000 | 44,386,000 | 44,387,000 | 44,388,000 | 44,389,000 | 44,390,000 | 44,391,000 | 44,392,000 |
| 44,393,000 | 44,394,000 | 44,395,000 | 44,396,000 | 44,397,000 | 44,398,000 | 44,399,000 | 44,400,000 |
| 44,401,000 | 44,402,000 | 44,403,000 | 44,404,000 | 44,405,000 | 44,406,000 | 44,407,000 | 44,408,000 |
| 44,409,000 | 44,410,000 | 44,411,000 | 44,412,000 | 44,413,000 | 44,414,000 | 44,415,000 | 44,416,000 |
| 44,417,000 | 44,418,000 | 44,419,000 | 44,420,000 | 44,421,000 | 44,422,000 | 44,423,000 | 44,424,000 |
| 44,425,000 | 44,426,000 | 44,427,000 | 44,428,000 | 44,429,000 | 44,430,000 | 44,431,000 | 44,432,000 |
| 44,433,000 | 44,434,000 | 44,435,000 | 44,436,000 | 44,437,000 | 44,438,000 | 44,439,000 | 44,440,000 |
| 44,441,000 | 44,442,000 | 44,443,000 | 44,444,000 | 44,445,000 | 44,446,000 | 44,447,000 | 44,448,000 |
| 44,449,000 | 44,450,000 | 44,451,000 | 44,452,000 | 44,453,000 | 44,454,000 | 44,455,000 | 44,456,000 |
| 44,457,000 | 44,458,000 | 44,459,000 | 44,460,000 | 44,461,000 | 44,462,000 | 44,463,000 | 44,464,000 |

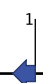

Supplemental Figure S8

|            |            |            |            |            |            |            |            |
|------------|------------|------------|------------|------------|------------|------------|------------|
| 44,465,000 | 44,466,000 | 44,467,000 | 44,468,000 | 44,469,000 | 44,470,000 | 44,471,000 | 44,472,000 |
| 44,473,000 | 44,474,000 | 44,475,000 | 44,476,000 | 44,477,000 | 44,478,000 | 44,479,000 | 44,480,000 |
| 44,481,000 | 44,482,000 | 44,483,000 | 44,484,000 | 44,485,000 | 44,486,000 | 44,487,000 | 44,488,000 |
| 44,489,000 | 44,490,000 | 44,491,000 | 44,492,000 | 44,493,000 | 44,494,000 | 44,495,000 | 44,496,000 |
| 44,497,000 | 44,498,000 | 44,499,000 | 44,500,000 | 44,501,000 | 44,502,000 | 44,503,000 | 44,504,000 |
| 44,505,000 | 44,506,000 | 44,507,000 | 44,508,000 | 44,509,000 | 44,510,000 | 44,511,000 | 44,512,000 |
| 44,513,000 | 44,514,000 | 44,515,000 | 44,516,000 | 44,517,000 | 44,518,000 | 44,519,000 | 44,520,000 |
| 44,521,000 | 44,522,000 | 44,523,000 | 44,524,000 | 44,525,000 | 44,526,000 | 44,527,000 | 44,528,000 |
| 44,529,000 | 44,530,000 | 44,531,000 | 44,532,000 | 44,533,000 | 44,534,000 | 44,535,000 | 44,536,000 |
| 44,537,000 | 44,538,000 | 44,539,000 | 44,540,000 | 44,541,000 | 44,542,000 | 44,543,000 | 44,544,000 |
| 44,545,000 | 44,546,000 | 44,547,000 | 44,548,000 | 44,549,000 | 44,550,000 | 44,551,000 | 44,552,000 |
| 44,553,000 | 44,554,000 | 44,555,000 | 44,556,000 | 44,557,000 | 44,558,000 | 44,559,000 | 44,560,000 |
| 44,561,000 | 44,562,000 | 44,563,000 | 44,564,000 | 44,565,000 | 44,566,000 | 44,567,000 | 44,568,000 |
| 44,569,000 | 44,570,000 | 44,571,000 | 44,572,000 | 44,573,000 | 44,574,000 | 44,575,000 | 44,576,000 |
| 44,577,000 | 44,578,000 | 44,579,000 | 44,580,000 | 44,581,000 | 44,582,000 | 44,583,000 | 44,584,000 |
| 44,585,000 | 44,586,000 | 44,587,000 | 44,588,000 | 44,589,000 | 44,590,000 | 44,591,000 | 44,592,000 |
| 44,593,000 | 44,594,000 | 44,595,000 | 44,596,000 | 44,597,000 | 44,598,000 | 44,599,000 | 44,600,000 |
| 44,601,000 | 44,602,000 | 44,603,000 | 44,604,000 | 44,605,000 | 44,606,000 | 44,607,000 | 44,608,000 |
| 44,609,000 | 44,610,000 | 44,611,000 | 44,612,000 | 44,613,000 | 44,614,000 | 44,615,000 | 44,616,000 |
| 44,617,000 | 44,618,000 | 44,619,000 | 44,620,000 | 44,621,000 | 44,622,000 | 44,623,000 | 44,624,000 |
| 44,625,000 | 44,626,000 | 44,627,000 | 44,628,000 | 44,629,000 | 44,630,000 | 44,631,000 | 44,632,000 |
| 44,633,000 | 44,634,000 | 44,635,000 | 44,636,000 | 44,637,000 | 44,638,000 | 44,639,000 | 44,640,000 |
| 44,641,000 | 44,642,000 | 44,643,000 | 44,644,000 | 44,645,000 | 44,646,000 | 44,647,000 | 44,648,000 |

Supplemental Figure S8

|            |            |            |            |            |            |            |            |
|------------|------------|------------|------------|------------|------------|------------|------------|
| 44,649,000 | 44,650,000 | 44,651,000 | 44,652,000 | 44,653,000 | 44,654,000 | 44,655,000 | 44,656,000 |
| 44,657,000 | 44,658,000 | 44,659,000 | 44,660,000 | 44,661,000 | 44,662,000 | 44,663,000 | 44,664,000 |
| 44,665,000 | 44,666,000 | 44,667,000 | 44,668,000 | 44,669,000 | 44,670,000 | 44,671,000 | 44,672,000 |
| 44,673,000 | 44,674,000 | 44,675,000 | 44,676,000 | 44,677,000 | 44,678,000 | 44,679,000 | 44,680,000 |
| 44,681,000 | 44,682,000 | 44,683,000 | 44,684,000 | 44,685,000 | 44,686,000 | 44,687,000 | 44,688,000 |
| 44,689,000 | 44,690,000 | 44,691,000 | 44,692,000 | 44,693,000 | 44,694,000 | 44,695,000 | 44,696,000 |
| 44,697,000 | 44,698,000 | 44,699,000 | 44,700,000 | 44,701,000 | 44,702,000 | 44,703,000 | 44,704,000 |
| 44,705,000 | 44,706,000 | 44,707,000 | 44,708,000 | 44,709,000 | 44,710,000 | 44,711,000 | 44,712,000 |
| 44,713,000 | 44,714,000 | 44,715,000 | 44,716,000 | 44,717,000 | 44,718,000 | 44,719,000 | 44,720,000 |
| 44,721,000 | 44,722,000 | 44,723,000 | 44,724,000 | 44,725,000 | 44,726,000 | 44,727,000 | 44,728,000 |
| 44,729,000 | 44,730,000 | 44,731,000 | 44,732,000 | 44,733,000 | 44,734,000 | 44,735,000 | 44,736,000 |
| 44,737,000 | 44,738,000 | 44,739,000 | 44,740,000 | 44,741,000 | 44,742,000 | 44,743,000 | 44,744,000 |
| 44,745,000 | 44,746,000 | 44,747,000 | 44,748,000 | 44,749,000 | 44,750,000 | 44,751,000 | 44,752,000 |
| 44,753,000 | 44,754,000 | 44,755,000 | 44,756,000 | 44,757,000 | 44,758,000 | 44,759,000 | 44,760,000 |
| 44,761,000 | 44,762,000 | 44,763,000 | 44,764,000 | 44,765,000 | 44,766,000 | 44,767,000 | 44,768,000 |
| 44,769,000 | 44,770,000 | 44,771,000 | 44,772,000 | 44,773,000 | 44,774,000 | 44,775,000 | 44,776,000 |
| 44,777,000 | 44,778,000 | 44,779,000 | 44,780,000 | 44,781,000 | 44,782,000 | 44,783,000 | 44,784,000 |
| 44,785,000 | 44,786,000 | 44,787,000 | 44,788,000 | 44,789,000 | 44,790,000 | 44,791,000 | 44,792,000 |
| 44,793,000 | 44,794,000 | 44,795,000 | 44,796,000 | 44,797,000 | 44,798,000 | 44,799,000 | 44,800,000 |
| 44,801,000 | 44,802,000 | 44,803,000 | 44,804,000 | 44,805,000 | 44,806,000 | 44,807,000 | 44,808,000 |
| 44,809,000 | 44,810,000 | 44,811,000 | 44,812,000 | 44,813,000 | 44,814,000 | 44,815,000 | 44,816,000 |
| 44,817,000 | 44,818,000 | 44,819,000 | 44,820,000 | 44,821,000 | 44,822,000 | 44,823,000 | 44,824,000 |
| 44,825,000 | 44,826,000 | 44,827,000 | 44,828,000 | 44,829,000 | 44,830,000 | 44,831,000 | 44,832,000 |

Supplemental Figure S8

|            |            |            |            |            |            |            |            |
|------------|------------|------------|------------|------------|------------|------------|------------|
| 44,833,000 | 44,834,000 | 44,835,000 | 44,836,000 | 44,837,000 | 44,838,000 | 44,839,000 | 44,840,000 |
| 44,841,000 | 44,842,000 | 44,843,000 | 44,844,000 | 44,845,000 | 44,846,000 | 44,847,000 | 44,848,000 |
| 44,849,000 | 44,850,000 | 44,851,000 | 44,852,000 | 44,853,000 | 44,854,000 | 44,855,000 | 44,856,000 |
| 44,857,000 | 44,858,000 | 44,859,000 | 44,860,000 | 44,861,000 | 44,862,000 | 44,863,000 | 44,864,000 |
| 44,865,000 | 44,866,000 | 44,867,000 | 44,868,000 | 44,869,000 | 44,870,000 | 44,871,000 | 44,872,000 |
| 44,873,000 | 44,874,000 | 44,875,000 | 44,876,000 | 44,877,000 | 44,878,000 | 44,879,000 | 44,880,000 |
| 44,881,000 | 44,882,000 | 44,883,000 | 44,884,000 | 44,885,000 | 44,886,000 | 44,887,000 | 44,888,000 |
| 44,889,000 | 44,890,000 | 44,891,000 | 44,892,000 | 44,893,000 | 44,894,000 | 44,895,000 | 44,896,000 |
| 44,897,000 | 44,898,000 | 44,899,000 | 44,900,000 | 44,901,000 | 44,902,000 | 44,903,000 | 44,904,000 |
| 44,905,000 | 44,906,000 | 44,907,000 | 44,908,000 | 44,909,000 | 44,910,000 | 44,911,000 | 44,912,000 |
| 44,913,000 | 44,914,000 | 44,915,000 | 44,916,000 | 44,917,000 | 44,918,000 | 44,919,000 | 44,920,000 |
| 44,921,000 | 44,922,000 | 44,923,000 | 44,924,000 | 44,925,000 | 44,926,000 | 44,927,000 | 44,928,000 |
| 44,929,000 | 44,930,000 | 44,931,000 | 44,932,000 | 44,933,000 | 44,934,000 | 44,935,000 | 44,936,000 |
| 44,937,000 | 44,938,000 | 44,939,000 | 44,940,000 | 44,941,000 | 44,942,000 | 44,943,000 | 44,944,000 |
| 44,945,000 | 44,946,000 | 44,947,000 | 44,948,000 | 44,949,000 | 44,950,000 | 44,951,000 | 44,952,000 |
| 44,953,000 | 44,954,000 | 44,955,000 | 44,956,000 | 44,957,000 | 44,958,000 | 44,959,000 | 44,960,000 |
| 44,961,000 | 44,962,000 | 44,963,000 | 44,964,000 | 44,965,000 | 44,966,000 | 44,967,000 | 44,968,000 |
| 44,969,000 | 44,970,000 | 44,971,000 | 44,972,000 | 44,973,000 | 44,974,000 | 44,975,000 | 44,976,000 |
| 44,977,000 | 44,978,000 | 44,979,000 | 44,980,000 | 44,981,000 | 44,982,000 | 44,983,000 | 44,984,000 |
| 44,985,000 | 44,986,000 | 44,987,000 | 44,988,000 | 44,989,000 | 44,990,000 | 44,991,000 | 44,992,000 |
| 44,993,000 | 44,994,000 | 44,995,000 | 44,996,000 | 44,997,000 | 44,998,000 | 44,999,000 | 45,000,000 |
| 45,001,000 | 45,002,000 | 45,003,000 | 45,004,000 | 45,005,000 | 45,006,000 | 45,007,000 | 45,008,000 |
| 45,009,000 | 45,010,000 | 45,011,000 | 45,012,000 | 45,013,000 | 45,014,000 | 45,015,000 | 45,016,000 |

Supplemental Figure S8

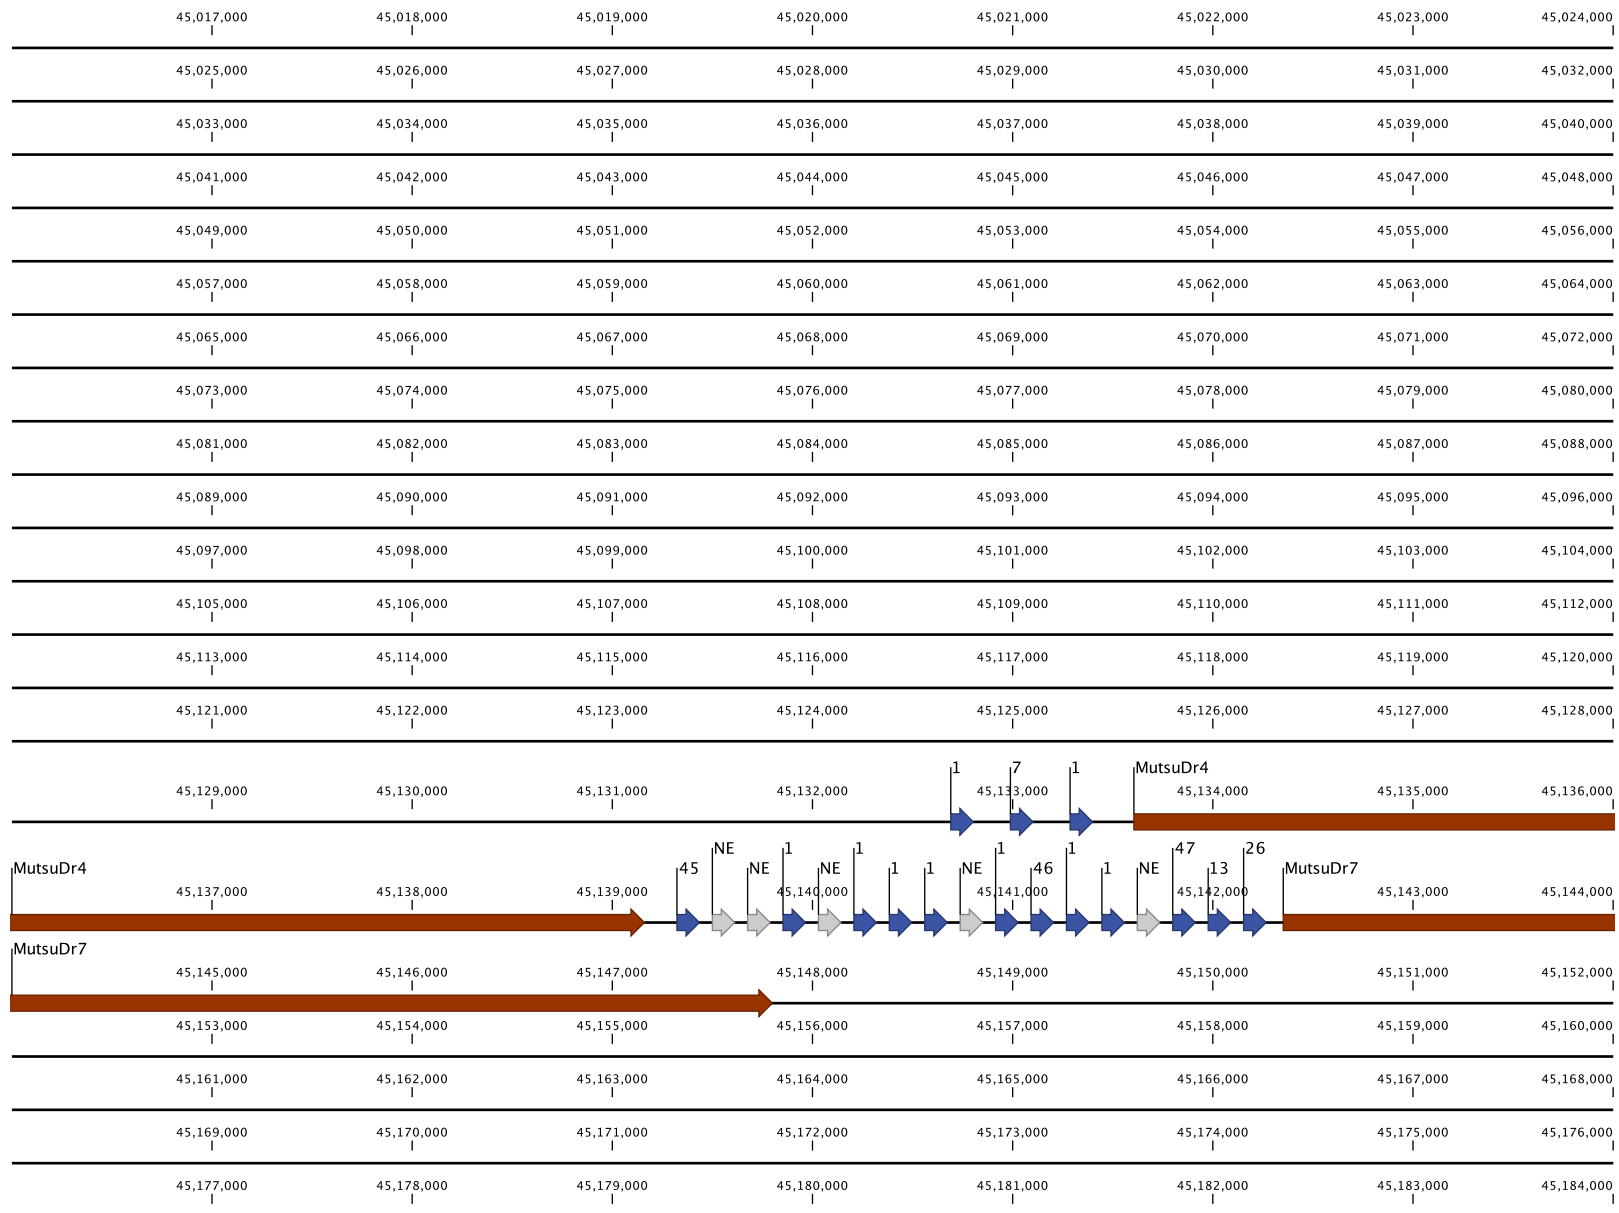



Supplemental Figure S8

|            |            |            |            |            |            |            |            |
|------------|------------|------------|------------|------------|------------|------------|------------|
| 45,185,000 | 45,186,000 | 45,187,000 | 45,188,000 | 45,189,000 | 45,190,000 | 45,191,000 | 45,192,000 |
| 45,193,000 | 45,194,000 | 45,195,000 | 45,196,000 | 45,197,000 | 45,198,000 | 45,199,000 | 45,200,000 |
| 45,201,000 | 45,202,000 | 45,203,000 | 45,204,000 | 45,205,000 | 45,206,000 | 45,207,000 | 45,208,000 |
| 45,209,000 | 45,210,000 | 45,211,000 | 45,212,000 | 45,213,000 | 45,214,000 | 45,215,000 | 45,216,000 |
| 45,217,000 | 45,218,000 | 45,219,000 | 45,220,000 | 45,221,000 | 45,222,000 | 45,223,000 | 45,224,000 |
| 45,225,000 | 45,226,000 | 45,227,000 | 45,228,000 | 45,229,000 | 45,230,000 | 45,231,000 | 45,232,000 |
| 45,233,000 | 45,234,000 | 45,235,000 | 45,236,000 | 45,237,000 | 45,238,000 | 45,239,000 | 45,240,000 |
| 45,241,000 | 45,242,000 | 45,243,000 | 45,244,000 | 45,245,000 | 45,246,000 | 45,247,000 | 45,248,000 |
| 45,249,000 | 45,250,000 | 45,251,000 | 45,252,000 | 45,253,000 | 45,254,000 | 45,255,000 | 45,256,000 |
| 45,257,000 | 45,258,000 | 45,259,000 | 45,260,000 | 45,261,000 | 45,262,000 | 45,263,000 | 45,264,000 |
| 45,265,000 | 45,266,000 | 45,267,000 | 45,268,000 | 45,269,000 | 45,270,000 | 45,271,000 | 45,272,000 |
| 45,273,000 | 45,274,000 | 45,275,000 | 45,276,000 | 45,277,000 | 45,278,000 | 45,279,000 | 45,280,000 |
| 45,281,000 | 45,282,000 | 45,283,000 | 45,284,000 | 45,285,000 | 45,286,000 | 45,287,000 | 45,288,000 |
| 45,289,000 | 45,290,000 | 45,291,000 | 45,292,000 | 45,293,000 | 45,294,000 | 45,295,000 | 45,296,000 |
| 45,297,000 | 45,298,000 | 45,299,000 | 45,300,000 | 45,301,000 | 45,302,000 | 45,303,000 | 45,304,000 |
| 45,305,000 | 45,306,000 | 45,307,000 | 45,308,000 | 45,309,000 | 45,310,000 | 45,311,000 | 45,312,000 |
| 45,313,000 | 45,314,000 | 45,315,000 | 45,316,000 | 45,317,000 | 45,318,000 | 45,319,000 | 45,320,000 |
| 45,321,000 | 45,322,000 | 45,323,000 | 45,324,000 | 45,325,000 | 45,326,000 | 45,327,000 | 45,328,000 |
| 45,329,000 | 45,330,000 | 45,331,000 | 45,332,000 | 45,333,000 | 45,334,000 | 45,335,000 | 45,336,000 |
| 45,337,000 | 45,338,000 | 45,339,000 | 45,340,000 | 45,341,000 | 45,342,000 | 45,343,000 | 45,344,000 |
| 45,345,000 | 45,346,000 | 45,347,000 | 45,348,000 | 45,349,000 | 45,350,000 | 45,351,000 | 45,352,000 |
| 45,353,000 | 45,354,000 | 45,355,000 | 45,356,000 | 45,357,000 | 45,358,000 | 45,359,000 | 45,360,000 |
| 45,361,000 | 45,362,000 | 45,363,000 | 45,364,000 | 45,365,000 | 45,366,000 | 45,367,000 | 45,368,000 |

NE  


Supplemental Figure S8

|            |            |            |            |            |            |            |            |
|------------|------------|------------|------------|------------|------------|------------|------------|
| 45,369,000 | 45,370,000 | 45,371,000 | 45,372,000 | 45,373,000 | 45,374,000 | 45,375,000 | 45,376,000 |
| 45,377,000 | 45,378,000 | 45,379,000 | 45,380,000 | 45,381,000 | 45,382,000 | 45,383,000 | 45,384,000 |
| 45,385,000 | 45,386,000 | 45,387,000 | 45,388,000 | 45,389,000 | 45,390,000 | 45,391,000 | 45,392,000 |
| 45,393,000 | 45,394,000 | 45,395,000 | 45,396,000 | 45,397,000 | 45,398,000 | 45,399,000 | 45,400,000 |
| 45,401,000 | 45,402,000 | 45,403,000 | 45,404,000 | 45,405,000 | 45,406,000 | 45,407,000 | 45,408,000 |
| 45,409,000 | 45,410,000 | 45,411,000 | 45,412,000 | 45,413,000 | 45,414,000 | 45,415,000 | 45,416,000 |
| 45,417,000 | 45,418,000 | 45,419,000 | 45,420,000 | 45,421,000 | 45,422,000 | 45,423,000 | 45,424,000 |
| 45,425,000 | 45,426,000 | 45,427,000 | 45,428,000 | 45,429,000 | 45,430,000 | 45,431,000 | 45,432,000 |
| 45,433,000 | 45,434,000 | 45,435,000 | 45,436,000 | 45,437,000 | 45,438,000 | 45,439,000 | 45,440,000 |
| 45,441,000 | 45,442,000 | 45,443,000 | 45,444,000 | 45,445,000 | 45,446,000 | 45,447,000 | 45,448,000 |
| 45,449,000 | 45,450,000 | 45,451,000 | 45,452,000 | 45,453,000 | 45,454,000 | 45,455,000 | 45,456,000 |
| 45,457,000 | 45,458,000 | 45,459,000 | 45,460,000 | 45,461,000 | 45,462,000 | 45,463,000 | 45,464,000 |
| 45,465,000 | 45,466,000 | 45,467,000 | 45,468,000 | 45,469,000 | 45,470,000 | 45,471,000 | 45,472,000 |
| 45,473,000 | 45,474,000 | 45,475,000 | 45,476,000 | 45,477,000 | 45,478,000 | 45,479,000 | 45,480,000 |
| 45,481,000 | 45,482,000 | 45,483,000 | 45,484,000 | 45,485,000 | 45,486,000 | 45,487,000 | 45,488,000 |
| 45,489,000 | 45,490,000 | 45,491,000 | 45,492,000 | 45,493,000 | 45,494,000 | 45,495,000 | 45,496,000 |
| 45,497,000 | 45,498,000 | 45,499,000 | 45,500,000 | 45,501,000 | 45,502,000 | 45,503,000 | 45,504,000 |
| 45,505,000 | 45,506,000 | 45,507,000 | 45,508,000 | 45,509,000 | 45,510,000 | 45,511,000 | 45,512,000 |
| 45,513,000 | 45,514,000 | 45,515,000 | 45,516,000 | 45,517,000 | 45,518,000 | 45,519,000 | 45,520,000 |
| 45,521,000 | 45,522,000 | 45,523,000 | 45,524,000 | 45,525,000 | 45,526,000 | 45,527,000 | 45,528,000 |
| 45,529,000 | 45,530,000 | 45,531,000 | 45,532,000 | 45,533,000 | 45,534,000 | 45,535,000 | 45,536,000 |
| 45,537,000 | 45,538,000 | 45,539,000 | 45,540,000 | 45,541,000 | 45,542,000 | 45,543,000 | 45,544,000 |
| 45,545,000 | 45,546,000 | 45,547,000 | 45,548,000 | 45,549,000 | 45,550,000 | 45,551,000 | 45,552,000 |

Supplemental Figure S8

|            |            |            |            |            |            |            |            |
|------------|------------|------------|------------|------------|------------|------------|------------|
| 45,553,000 | 45,554,000 | 45,555,000 | 45,556,000 | 45,557,000 | 45,558,000 | 45,559,000 | 45,560,000 |
| 45,561,000 | 45,562,000 | 45,563,000 | 45,564,000 | 45,565,000 | 45,566,000 | 45,567,000 | 45,568,000 |
| 45,569,000 | 45,570,000 | 45,571,000 | 45,572,000 | 45,573,000 | 45,574,000 | 45,575,000 | 45,576,000 |
| 45,577,000 | 45,578,000 | 45,579,000 | 45,580,000 | 45,581,000 | 45,582,000 | 45,583,000 | 45,584,000 |
| 45,585,000 | 45,586,000 | 45,587,000 | 45,588,000 | 45,589,000 | 45,590,000 | 45,591,000 | 45,592,000 |
| 45,593,000 | 45,594,000 | 45,595,000 | 45,596,000 | 45,597,000 | 45,598,000 | 45,599,000 | 45,600,000 |
| 45,601,000 | 45,602,000 | 45,603,000 | 45,604,000 | 45,605,000 | 45,606,000 | 45,607,000 | 45,608,000 |
| 45,609,000 | 45,610,000 | 45,611,000 | 45,612,000 | 45,613,000 | 45,614,000 | 45,615,000 | 45,616,000 |
| 45,617,000 | 45,618,000 | 45,619,000 | 45,620,000 | 45,621,000 | 45,622,000 | 45,623,000 | 45,624,000 |
| 45,625,000 | 45,626,000 | 45,627,000 | 45,628,000 | 45,629,000 | 45,630,000 | 45,631,000 | 45,632,000 |
| 45,633,000 | 45,634,000 | 45,635,000 | 45,636,000 | 45,637,000 | 45,638,000 | 45,639,000 | 45,640,000 |
| 45,641,000 | 45,642,000 | 45,643,000 | 45,644,000 | 45,645,000 | 45,646,000 | 45,647,000 | 45,648,000 |
| 45,649,000 | 45,650,000 | 45,651,000 | 45,652,000 | 45,653,000 | 45,654,000 | 45,655,000 | 45,656,000 |
| 45,657,000 | 45,658,000 | 45,659,000 | 45,660,000 | 45,661,000 | 45,662,000 | 45,663,000 | 45,664,000 |
| 45,665,000 | 45,666,000 | 45,667,000 | 45,668,000 | 45,669,000 | 45,670,000 | 45,671,000 | 45,672,000 |
| 45,673,000 | 45,674,000 | 45,675,000 | 45,676,000 | 45,677,000 | 45,678,000 | 45,679,000 | 45,680,000 |
| 45,681,000 | 45,682,000 | 45,683,000 | 45,684,000 | 45,685,000 | 45,686,000 | 45,687,000 | 45,688,000 |
| 45,689,000 | 45,690,000 | 45,691,000 | 45,692,000 | 45,693,000 | 45,694,000 | 45,695,000 | 45,696,000 |
| 45,697,000 | 45,698,000 | 45,699,000 | 45,700,000 | 45,701,000 | 45,702,000 | 45,703,000 | 45,704,000 |
| 45,705,000 | 45,706,000 | 45,707,000 | 45,708,000 | 45,709,000 | 45,710,000 | 45,711,000 | 45,712,000 |
| 45,713,000 | 45,714,000 | 45,715,000 | 45,716,000 | 45,717,000 | 45,718,000 | 45,719,000 | 45,720,000 |
| 45,721,000 | 45,722,000 | 45,723,000 | 45,724,000 | 45,725,000 | 45,726,000 | 45,727,000 | 45,728,000 |
| 45,729,000 | 45,730,000 | 45,731,000 | 45,732,000 | 45,733,000 | 45,734,000 | 45,735,000 | 45,736,000 |

Supplemental Figure S8

|            |            |            |            |            |            |            |            |
|------------|------------|------------|------------|------------|------------|------------|------------|
| 45,737,000 | 45,738,000 | 45,739,000 | 45,740,000 | 45,741,000 | 45,742,000 | 45,743,000 | 45,744,000 |
| 45,745,000 | 45,746,000 | 45,747,000 | 45,748,000 | 45,749,000 | 45,750,000 | 45,751,000 | 45,752,000 |
| 45,753,000 | 45,754,000 | 45,755,000 | 45,756,000 | 45,757,000 | 45,758,000 | 45,759,000 | 45,760,000 |
| 45,761,000 | 45,762,000 | 45,763,000 | 45,764,000 | 45,765,000 | 45,766,000 | 45,767,000 | 45,768,000 |
| 45,769,000 | 45,770,000 | 45,771,000 | 45,772,000 | 45,773,000 | 45,774,000 | 45,775,000 | 45,776,000 |
| 45,777,000 | 45,778,000 | 45,779,000 | 45,780,000 | 45,781,000 | 45,782,000 | 45,783,000 | 45,784,000 |
| 45,785,000 | 45,786,000 | 45,787,000 | 45,788,000 | 45,789,000 | 45,790,000 | 45,791,000 | 45,792,000 |
| 45,793,000 | 45,794,000 | 45,795,000 | 45,796,000 | 45,797,000 | 45,798,000 | 45,799,000 | 45,800,000 |
| 45,801,000 | 45,802,000 | 45,803,000 | 45,804,000 | 45,805,000 | 45,806,000 | 45,807,000 | 45,808,000 |
| 45,809,000 | 45,810,000 | 45,811,000 | 45,812,000 | 45,813,000 | 45,814,000 | 45,815,000 | 45,816,000 |
| 45,817,000 | 45,818,000 | 45,819,000 | 45,820,000 | 45,821,000 | 45,822,000 | 45,823,000 | 45,824,000 |
| 45,825,000 | 45,826,000 | 45,827,000 | 45,828,000 | 45,829,000 | 45,830,000 | 45,831,000 | 45,832,000 |
| 45,833,000 | 45,834,000 | 45,835,000 | 45,836,000 | 45,837,000 | 45,838,000 | 45,839,000 | 45,840,000 |
| 45,841,000 | 45,842,000 | 45,843,000 | 45,844,000 | 45,845,000 | 45,846,000 | 45,847,000 | 45,848,000 |
| 45,849,000 | 45,850,000 | 45,851,000 | 45,852,000 | 45,853,000 | 45,854,000 | 45,855,000 | 45,856,000 |
| 45,857,000 | 45,858,000 | 45,859,000 | 45,860,000 | 45,861,000 | 45,862,000 | 45,863,000 | 45,864,000 |
| 45,865,000 | 45,866,000 | 45,867,000 | 45,868,000 | 45,869,000 | 45,870,000 | 45,871,000 | 45,872,000 |
| 45,873,000 | 45,874,000 | 45,875,000 | 45,876,000 | 45,877,000 | 45,878,000 | 45,879,000 | 45,880,000 |
| 45,881,000 | 45,882,000 | 45,883,000 | 45,884,000 | 45,885,000 | 45,886,000 | 45,887,000 | 45,888,000 |
| 45,889,000 | 45,890,000 | 45,891,000 | 45,892,000 | 45,893,000 | 45,894,000 | 45,895,000 | 45,896,000 |
| 45,897,000 | 45,898,000 | 45,899,000 | 45,900,000 | 45,901,000 | 45,902,000 | 45,903,000 | 45,904,000 |
| 45,905,000 | 45,906,000 | 45,907,000 | 45,908,000 | 45,909,000 | 45,910,000 | 45,911,000 | 45,912,000 |
| 45,913,000 | 45,914,000 | 45,915,000 | 45,916,000 | 45,917,000 | 45,918,000 | 45,919,000 | 45,920,000 |

Supplemental Figure S8

|            |            |            |            |            |            |            |            |
|------------|------------|------------|------------|------------|------------|------------|------------|
| 45,921,000 | 45,922,000 | 45,923,000 | 45,924,000 | 45,925,000 | 45,926,000 | 45,927,000 | 45,928,000 |
| 45,929,000 | 45,930,000 | 45,931,000 | 45,932,000 | 45,933,000 | 45,934,000 | 45,935,000 | 45,936,000 |
| 45,937,000 | 45,938,000 | 45,939,000 | 45,940,000 | 45,941,000 | 45,942,000 | 45,943,000 | 45,944,000 |
| 45,945,000 | 45,946,000 | 45,947,000 | 45,948,000 | 45,949,000 | 45,950,000 | 45,951,000 | 45,952,000 |
| 45,953,000 | 45,954,000 | 45,955,000 | 45,956,000 | 45,957,000 | 45,958,000 | 45,959,000 | 45,960,000 |
| 45,961,000 | 45,962,000 | 45,963,000 | 45,964,000 | 45,965,000 | 45,966,000 | 45,967,000 | 45,968,000 |
| 45,969,000 | 45,970,000 | 45,971,000 | 45,972,000 | 45,973,000 | 45,974,000 | 45,975,000 | 45,976,000 |
| 45,977,000 | 45,978,000 | 45,979,000 | 45,980,000 | 45,981,000 | 45,982,000 | 45,983,000 | 45,984,000 |
| 45,985,000 | 45,986,000 | 45,987,000 | 45,988,000 | 45,989,000 | 45,990,000 | 45,991,000 | 45,992,000 |
| 45,993,000 | 45,994,000 | 45,995,000 | 45,996,000 | 45,997,000 | 45,998,000 | 45,999,000 | 46,000,000 |
| 46,001,000 | 46,002,000 | 46,003,000 | 46,004,000 | 46,005,000 | 46,006,000 | 46,007,000 | 46,008,000 |
| 46,009,000 | 46,010,000 | 46,011,000 | 46,012,000 | 46,013,000 | 46,014,000 | 46,015,000 | 46,016,000 |
| 46,017,000 | 46,018,000 | 46,019,000 | 46,020,000 | 46,021,000 | 46,022,000 | 46,023,000 | 46,024,000 |
| 46,025,000 | 46,026,000 | 46,027,000 | 46,028,000 | 46,029,000 | 46,030,000 | 46,031,000 | 46,032,000 |
| 46,033,000 | 46,034,000 | 46,035,000 | 46,036,000 | 46,037,000 | 46,038,000 | 46,039,000 | 46,040,000 |
| 46,041,000 | 46,042,000 | 46,043,000 | 46,044,000 | 46,045,000 | 46,046,000 | 46,047,000 | 46,048,000 |
| 46,049,000 | 46,050,000 | 46,051,000 | 46,052,000 | 46,053,000 | 46,054,000 | 46,055,000 | 46,056,000 |
| 46,057,000 | 46,058,000 | 46,059,000 | 46,060,000 | 46,061,000 | 46,062,000 | 46,063,000 | 46,064,000 |
| 46,065,000 | 46,066,000 | 46,067,000 | 46,068,000 | 46,069,000 | 46,070,000 | 46,071,000 | 46,072,000 |
| 46,073,000 | 46,074,000 | 46,075,000 | 46,076,000 | 46,077,000 | 46,078,000 | 46,079,000 | 46,080,000 |
| 46,081,000 | 46,082,000 | 46,083,000 | 46,084,000 | 46,085,000 | 46,086,000 | 46,087,000 | 46,088,000 |
| 46,089,000 | 46,090,000 | 46,091,000 | 46,092,000 | 46,093,000 | 46,094,000 | 46,095,000 | 46,096,000 |
| 46,097,000 | 46,098,000 | 46,099,000 | 46,100,000 | 46,101,000 | 46,102,000 | 46,103,000 | 46,104,000 |

NE

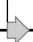

Supplemental Figure S8

|            |            |            |            |            |            |            |            |
|------------|------------|------------|------------|------------|------------|------------|------------|
| 46,105,000 | 46,106,000 | 46,107,000 | 46,108,000 | 46,109,000 | 46,110,000 | 46,111,000 | 46,112,000 |
| 46,113,000 | 46,114,000 | 46,115,000 | 46,116,000 | 46,117,000 | 46,118,000 | 46,119,000 | 46,120,000 |
| 46,121,000 | 46,122,000 | 46,123,000 | 46,124,000 | 46,125,000 | 46,126,000 | 46,127,000 | 46,128,000 |
| 46,129,000 | 46,130,000 | 46,131,000 | 46,132,000 | 46,133,000 | 46,134,000 | 46,135,000 | 46,136,000 |
| 46,137,000 | 46,138,000 | 46,139,000 | 46,140,000 | 46,141,000 | 46,142,000 | 46,143,000 | 46,144,000 |
| 46,145,000 | 46,146,000 | 46,147,000 | 46,148,000 | 46,149,000 | 46,150,000 | 46,151,000 | 46,152,000 |
| 46,153,000 | 46,154,000 | 46,155,000 | 46,156,000 | 46,157,000 | 46,158,000 | 46,159,000 | 46,160,000 |
| 46,161,000 | 46,162,000 | 46,163,000 | 46,164,000 | 46,165,000 | 46,166,000 | 46,167,000 | 46,168,000 |
| 46,169,000 | 46,170,000 | 46,171,000 | 46,172,000 | 46,173,000 | 46,174,000 | 46,175,000 | 46,176,000 |
| 46,177,000 | 46,178,000 | 46,179,000 | 46,180,000 | 46,181,000 | 46,182,000 | 46,183,000 | 46,184,000 |
| 46,185,000 | 46,186,000 | 46,187,000 | 46,188,000 | 46,189,000 | 46,190,000 | 46,191,000 | 46,192,000 |
| 46,193,000 | 46,194,000 | 46,195,000 | 46,196,000 | 46,197,000 | 46,198,000 | 46,199,000 | 46,200,000 |
| 46,201,000 | 46,202,000 | 46,203,000 | 46,204,000 | 46,205,000 | 46,206,000 | 46,207,000 | 46,208,000 |
| 46,209,000 | 46,210,000 | 46,211,000 | 46,212,000 | 46,213,000 | 46,214,000 | 46,215,000 | 46,216,000 |
| 46,217,000 | 46,218,000 | 46,219,000 | 46,220,000 | 46,221,000 | 46,222,000 | 46,223,000 | 46,224,000 |
| 46,225,000 | 46,226,000 | 46,227,000 | 46,228,000 | 46,229,000 | 46,230,000 | 46,231,000 | 46,232,000 |
| 46,233,000 | 46,234,000 | 46,235,000 | 46,236,000 | 46,237,000 | 46,238,000 | 46,239,000 | 46,240,000 |
| 46,241,000 | 46,242,000 | 46,243,000 | 46,244,000 | 46,245,000 | 46,246,000 | 46,247,000 | 46,248,000 |
| 46,249,000 | 46,250,000 | 46,251,000 | 46,252,000 | 46,253,000 | 46,254,000 | 46,255,000 | 46,256,000 |
| 46,257,000 | 46,258,000 | 46,259,000 | 46,260,000 | 46,261,000 | 46,262,000 | 46,263,000 | 46,264,000 |
| 46,265,000 | 46,266,000 | 46,267,000 | 46,268,000 | 46,269,000 | 46,270,000 | 46,271,000 | 46,272,000 |
| 46,273,000 | 46,274,000 | 46,275,000 | 46,276,000 | 46,277,000 | 46,278,000 | 46,279,000 | 46,280,000 |
| 46,281,000 | 46,282,000 | 46,283,000 | 46,284,000 | 46,285,000 | 46,286,000 | 46,287,000 | 46,288,000 |

NE

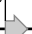

Supplemental Figure S8

|            |            |            |            |            |            |            |            |
|------------|------------|------------|------------|------------|------------|------------|------------|
| 46,289,000 | 46,290,000 | 46,291,000 | 46,292,000 | 46,293,000 | 46,294,000 | 46,295,000 | 46,296,000 |
| 46,297,000 | 46,298,000 | 46,299,000 | 46,300,000 | 46,301,000 | 46,302,000 | 46,303,000 | 46,304,000 |
| 46,305,000 | 46,306,000 | 46,307,000 | 46,308,000 | 46,309,000 | 46,310,000 | 46,311,000 | 46,312,000 |
| 46,313,000 | 46,314,000 | 46,315,000 | 46,316,000 | 46,317,000 | 46,318,000 | 46,319,000 | 46,320,000 |
| 46,321,000 | 46,322,000 | 46,323,000 | 46,324,000 | 46,325,000 | 46,326,000 | 46,327,000 | 46,328,000 |
| 46,329,000 | 46,330,000 | 46,331,000 | 46,332,000 | 46,333,000 | 46,334,000 | 46,335,000 | 46,336,000 |
| 46,337,000 | 46,338,000 | 46,339,000 | 46,340,000 | 46,341,000 | 46,342,000 | 46,343,000 | 46,344,000 |
| 46,345,000 | 46,346,000 | 46,347,000 | 46,348,000 | 46,349,000 | 46,350,000 | 46,351,000 | 46,352,000 |
| 46,353,000 | 46,354,000 | 46,355,000 | 46,356,000 | 46,357,000 | 46,358,000 | 46,359,000 | 46,360,000 |
| 46,361,000 | 46,362,000 | 46,363,000 | 46,364,000 | 46,365,000 | 46,366,000 | 46,367,000 | 46,368,000 |
| 46,369,000 | 46,370,000 | 46,371,000 | 46,372,000 | 46,373,000 | 46,374,000 | 46,375,000 | 46,376,000 |
| 46,377,000 | 46,378,000 | 46,379,000 | 46,380,000 | 46,381,000 | 46,382,000 | 46,383,000 | 46,384,000 |
| 46,385,000 | 46,386,000 | 46,387,000 | 46,388,000 | 46,389,000 | 46,390,000 | 46,391,000 | 46,392,000 |
| 46,393,000 | 46,394,000 | 46,395,000 | 46,396,000 | 46,397,000 | 46,398,000 | 46,399,000 | 46,400,000 |
| 46,401,000 | 46,402,000 | 46,403,000 | 46,404,000 | 46,405,000 | 46,406,000 | 46,407,000 | 46,408,000 |
| 46,409,000 | 46,410,000 | 46,411,000 | 46,412,000 | 46,413,000 | 46,414,000 | 46,415,000 | 46,416,000 |
| 46,417,000 | 46,418,000 | 46,419,000 | 46,420,000 | 46,421,000 | 46,422,000 | 46,423,000 | 46,424,000 |
| 46,425,000 | 46,426,000 | 46,427,000 | 46,428,000 | 46,429,000 | 46,430,000 | 46,431,000 | 46,432,000 |
| 46,433,000 | 46,434,000 | 46,435,000 | 46,436,000 | 46,437,000 | 46,438,000 | 46,439,000 | 46,440,000 |
| 46,441,000 | 46,442,000 | 46,443,000 | 46,444,000 | 46,445,000 | 46,446,000 | 46,447,000 | 46,448,000 |
| 46,449,000 | 46,450,000 | 46,451,000 | 46,452,000 | 46,453,000 | 46,454,000 | 46,455,000 | 46,456,000 |
| 46,457,000 | 46,458,000 | 46,459,000 | 46,460,000 | 46,461,000 | 46,462,000 | 46,463,000 | 46,464,000 |

NE

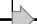

NE

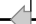

Supplemental Figure S8

|            |            |            |            |            |            |            |            |
|------------|------------|------------|------------|------------|------------|------------|------------|
| 46,465,000 | 46,466,000 | 46,467,000 | 46,468,000 | 46,469,000 | 46,470,000 | 46,471,000 | 46,472,000 |
| 46,473,000 | 46,474,000 | 46,475,000 | 46,476,000 | 46,477,000 | 46,478,000 | 46,479,000 | 46,480,000 |
| 46,481,000 | 46,482,000 | 46,483,000 | 46,484,000 | 46,485,000 | 46,486,000 | 46,487,000 | 46,488,000 |
| 46,489,000 | 46,490,000 | 46,491,000 | 46,492,000 | 46,493,000 | 46,494,000 | 46,495,000 | 46,496,000 |
| 46,497,000 | 46,498,000 | 46,499,000 | 46,500,000 | 46,501,000 | 46,502,000 | 46,503,000 | 46,504,000 |
| 46,505,000 | 46,506,000 | 46,507,000 | 46,508,000 | 46,509,000 | 46,510,000 | 46,511,000 | 46,512,000 |
| 46,513,000 | 46,514,000 | 46,515,000 | 46,516,000 | 46,517,000 | 46,518,000 | 46,519,000 | 46,520,000 |
| 46,521,000 | 46,522,000 | 46,523,000 | 46,524,000 | 46,525,000 | 46,526,000 | 46,527,000 | 46,528,000 |
| 46,529,000 | 46,530,000 | 46,531,000 | 46,532,000 | 46,533,000 | 46,534,000 | 46,535,000 | 46,536,000 |
| 46,537,000 | 46,538,000 | 46,539,000 | 46,540,000 | 46,541,000 | 46,542,000 | 46,543,000 | 46,544,000 |
| 46,545,000 | 46,546,000 | 46,547,000 | 46,548,000 | 46,549,000 | 46,550,000 | 46,551,000 | 46,552,000 |
| 46,553,000 | 46,554,000 | 46,555,000 | 46,556,000 | 46,557,000 | 46,558,000 | 46,559,000 | 46,560,000 |
| 46,561,000 | 46,562,000 | 46,563,000 | 46,564,000 | 46,565,000 | 46,566,000 | 46,567,000 | 46,568,000 |
| 46,569,000 | 46,570,000 | 46,571,000 | 46,572,000 | 46,573,000 | 46,574,000 | 46,575,000 | 46,576,000 |
| 46,577,000 | 46,578,000 | 46,579,000 | 46,580,000 | 46,581,000 | 46,582,000 | 46,583,000 | 46,584,000 |
| 46,585,000 | 46,586,000 | 46,587,000 | 46,588,000 | 46,589,000 | 46,590,000 | 46,591,000 | 46,592,000 |
| 46,593,000 | 46,594,000 | 46,595,000 | 46,596,000 | 46,597,000 | 46,598,000 | 46,599,000 | 46,600,000 |
| 46,601,000 | 46,602,000 | 46,603,000 | 46,604,000 | 46,605,000 | 46,606,000 | 46,607,000 | 46,608,000 |
| 46,609,000 | 46,610,000 | 46,611,000 | 46,612,000 | 46,613,000 | 46,614,000 | 46,615,000 | 46,616,000 |
| 46,617,000 | 46,618,000 | 46,619,000 | 46,620,000 | 46,621,000 | 46,622,000 | 46,623,000 | 46,624,000 |
| 46,625,000 | 46,626,000 | 46,627,000 | 46,628,000 | 46,629,000 | 46,630,000 | 46,631,000 | 46,632,000 |
| 46,633,000 | 46,634,000 | 46,635,000 | 46,636,000 | 46,637,000 | 46,638,000 | 46,639,000 | 46,640,000 |
| 46,641,000 | 46,642,000 | 46,643,000 | 46,644,000 | 46,645,000 | 46,646,000 | 46,647,000 | 46,648,000 |



Supplemental Figure S8

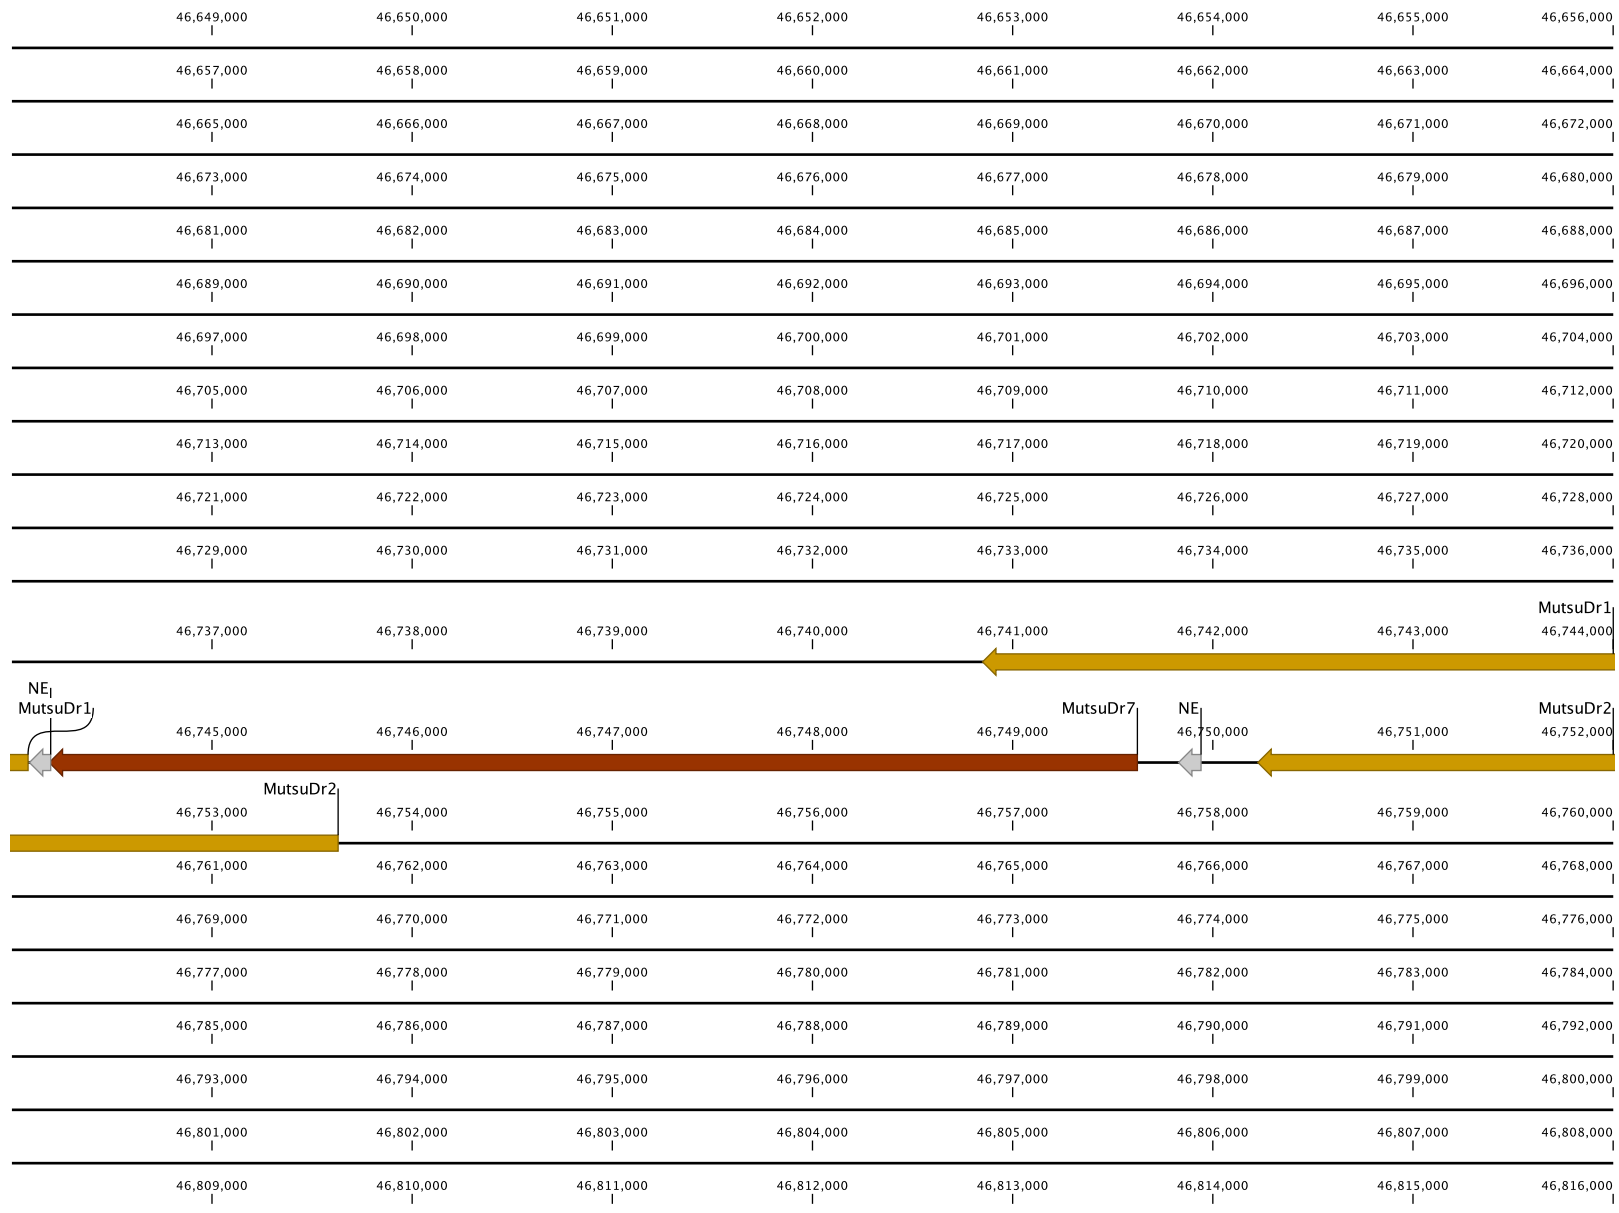

Supplemental Figure S8

|            |            |            |            |            |            |            |            |
|------------|------------|------------|------------|------------|------------|------------|------------|
| 46,817,000 | 46,818,000 | 46,819,000 | 46,820,000 | 46,821,000 | 46,822,000 | 46,823,000 | 46,824,000 |
| 46,825,000 | 46,826,000 | 46,827,000 | 46,828,000 | 46,829,000 | 46,830,000 | 46,831,000 | 46,832,000 |
| 46,833,000 | 46,834,000 | 46,835,000 | 46,836,000 | 46,837,000 | 46,838,000 | 46,839,000 | 46,840,000 |
| 46,841,000 | 46,842,000 | 46,843,000 | 46,844,000 | 46,845,000 | 46,846,000 | 46,847,000 | 46,848,000 |
| 46,849,000 | 46,850,000 | 46,851,000 | 46,852,000 | 46,853,000 | 46,854,000 | 46,855,000 | 46,856,000 |
| 46,857,000 | 46,858,000 | 46,859,000 | 46,860,000 | 46,861,000 | 46,862,000 | 46,863,000 | 46,864,000 |
| 46,865,000 | 46,866,000 | 46,867,000 | 46,868,000 | 46,869,000 | 46,870,000 | 46,871,000 | 46,872,000 |
| 46,873,000 | 46,874,000 | 46,875,000 | 46,876,000 | 46,877,000 | 46,878,000 | 46,879,000 | 46,880,000 |
| 46,881,000 | 46,882,000 | 46,883,000 | 46,884,000 | 46,885,000 | 46,886,000 | 46,887,000 | 46,888,000 |
| 46,889,000 | 46,890,000 | 46,891,000 | 46,892,000 | 46,893,000 | 46,894,000 | 46,895,000 | 46,896,000 |
| 46,897,000 | 46,898,000 | 46,899,000 | 46,900,000 | 46,901,000 | 46,902,000 | 46,903,000 | 46,904,000 |
| 46,905,000 | 46,906,000 | 46,907,000 | 46,908,000 | 46,909,000 | 46,910,000 | 46,911,000 | 46,912,000 |
| 46,913,000 | 46,914,000 | 46,915,000 | 46,916,000 | 46,917,000 | 46,918,000 | 46,919,000 | 46,920,000 |
| 46,921,000 | 46,922,000 | 46,923,000 | 46,924,000 | 46,925,000 | 46,926,000 | 46,927,000 | 46,928,000 |
| 46,929,000 | 46,930,000 | 46,931,000 | 46,932,000 | 46,933,000 | 46,934,000 | 46,935,000 | 46,936,000 |
| 46,937,000 | 46,938,000 | 46,939,000 | 46,940,000 | 46,941,000 | 46,942,000 | 46,943,000 | 46,944,000 |
| 46,945,000 | 46,946,000 | 46,947,000 | 46,948,000 | 46,949,000 | 46,950,000 | 46,951,000 | 46,952,000 |
| 46,953,000 | 46,954,000 | 46,955,000 | 46,956,000 | 46,957,000 | 46,958,000 | 46,959,000 | 46,960,000 |
| 46,961,000 | 46,962,000 | 46,963,000 | 46,964,000 | 46,965,000 | 46,966,000 | 46,967,000 | 46,968,000 |
| 46,969,000 | 46,970,000 | 46,971,000 | 46,972,000 | 46,973,000 | 46,974,000 | 46,975,000 | 46,976,000 |
| 46,977,000 | 46,978,000 | 46,979,000 | 46,980,000 | 46,981,000 | 46,982,000 | 46,983,000 | 46,984,000 |
| 46,985,000 | 46,986,000 | 46,987,000 | 46,988,000 | 46,989,000 | 46,990,000 | 46,991,000 | 46,992,000 |
| 46,993,000 | 46,994,000 | 46,995,000 | 46,996,000 | 46,997,000 | 46,998,000 | 46,999,000 | 47,000,000 |

Supplemental Figure S8

|            |            |            |            |            |            |            |            |
|------------|------------|------------|------------|------------|------------|------------|------------|
| 47,001,000 | 47,002,000 | 47,003,000 | 47,004,000 | 47,005,000 | 47,006,000 | 47,007,000 | 47,008,000 |
| 47,009,000 | 47,010,000 | 47,011,000 | 47,012,000 | 47,013,000 | 47,014,000 | 47,015,000 | 47,016,000 |
| 47,017,000 | 47,018,000 | 47,019,000 | 47,020,000 | 47,021,000 | 47,022,000 | 47,023,000 | 47,024,000 |
| 47,025,000 | 47,026,000 | 47,027,000 | 47,028,000 | 47,029,000 | 47,030,000 | 47,031,000 | 47,032,000 |
| 47,033,000 | 47,034,000 | 47,035,000 | 47,036,000 | 47,037,000 | 47,038,000 | 47,039,000 | 47,040,000 |
| 47,041,000 | 47,042,000 | 47,043,000 | 47,044,000 | 47,045,000 | 47,046,000 | 47,047,000 | 47,048,000 |
| 47,049,000 | 47,050,000 | 47,051,000 | 47,052,000 | 47,053,000 | 47,054,000 | 47,055,000 | 47,056,000 |
| 47,057,000 | 47,058,000 | 47,059,000 | 47,060,000 | 47,061,000 | 47,062,000 | 47,063,000 | 47,064,000 |
| 47,065,000 | 47,066,000 | 47,067,000 | 47,068,000 | 47,069,000 | 47,070,000 | 47,071,000 | 47,072,000 |
| 47,073,000 | 47,074,000 | 47,075,000 | 47,076,000 | 47,077,000 | 47,078,000 | 47,079,000 | 47,080,000 |
| 47,081,000 | 47,082,000 | 47,083,000 | 47,084,000 | 47,085,000 | 47,086,000 | 47,087,000 | 47,088,000 |
| 47,089,000 | 47,090,000 | 47,091,000 | 47,092,000 | 47,093,000 | 47,094,000 | 47,095,000 | 47,096,000 |
| 47,097,000 | 47,098,000 | 47,099,000 | 47,100,000 | 47,101,000 | 47,102,000 | 47,103,000 | 47,104,000 |
| 47,105,000 | 47,106,000 | 47,107,000 | 47,108,000 | 47,109,000 | 47,110,000 | 47,111,000 | 47,112,000 |
| 47,113,000 | 47,114,000 | 47,115,000 | 47,116,000 | 47,117,000 | 47,118,000 | 47,119,000 | 47,120,000 |
| 47,121,000 | 47,122,000 | 47,123,000 | 47,124,000 | 47,125,000 | 47,126,000 | 47,127,000 | 47,128,000 |
| 47,129,000 | 47,130,000 | 47,131,000 | 47,132,000 | 47,133,000 | 47,134,000 | 47,135,000 | 47,136,000 |
| 47,137,000 | 47,138,000 | 47,139,000 | 47,140,000 | 47,141,000 | 47,142,000 | 47,143,000 | 47,144,000 |
| 47,145,000 | 47,146,000 | 47,147,000 | 47,148,000 | 47,149,000 | 47,150,000 | 47,151,000 | 47,152,000 |
| 47,153,000 | 47,154,000 | 47,155,000 | 47,156,000 | 47,157,000 | 47,158,000 | 47,159,000 | 47,160,000 |
| 47,161,000 | 47,162,000 | 47,163,000 | 47,164,000 | 47,165,000 | 47,166,000 | 47,167,000 | 47,168,000 |
| 47,169,000 | 47,170,000 | 47,171,000 | 47,172,000 | 47,173,000 | 47,174,000 | 47,175,000 | 47,176,000 |
| 47,177,000 | 47,178,000 | 47,179,000 | 47,180,000 | 47,181,000 | 47,182,000 | 47,183,000 | 47,184,000 |

Supplemental Figure S8

|            |            |            |            |            |            |            |            |
|------------|------------|------------|------------|------------|------------|------------|------------|
| 47,185,000 | 47,186,000 | 47,187,000 | 47,188,000 | 47,189,000 | 47,190,000 | 47,191,000 | 47,192,000 |
| 47,193,000 | 47,194,000 | 47,195,000 | 47,196,000 | 47,197,000 | 47,198,000 | 47,199,000 | 47,200,000 |
| 47,201,000 | 47,202,000 | 47,203,000 | 47,204,000 | 47,205,000 | 47,206,000 | 47,207,000 | 47,208,000 |
| 47,209,000 | 47,210,000 | 47,211,000 | 47,212,000 | 47,213,000 | 47,214,000 | 47,215,000 | 47,216,000 |
| 47,217,000 | 47,218,000 | 47,219,000 | 47,220,000 | 47,221,000 | 47,222,000 | 47,223,000 | 47,224,000 |
| 47,225,000 | 47,226,000 | 47,227,000 | 47,228,000 | 47,229,000 | 47,230,000 | 47,231,000 | 47,232,000 |
| 47,233,000 | 47,234,000 | 47,235,000 | 47,236,000 | 47,237,000 | 47,238,000 | 47,239,000 | 47,240,000 |
| 47,241,000 | 47,242,000 | 47,243,000 | 47,244,000 | 47,245,000 | 47,246,000 | 47,247,000 | 47,248,000 |
| 47,249,000 | 47,250,000 | 47,251,000 | 47,252,000 | 47,253,000 | 47,254,000 | 47,255,000 | 47,256,000 |
| 47,257,000 | 47,258,000 | 47,259,000 | 47,260,000 | 47,261,000 | 47,262,000 | 47,263,000 | 47,264,000 |
| 47,265,000 | 47,266,000 | 47,267,000 | 47,268,000 | 47,269,000 | 47,270,000 | 47,271,000 | 47,272,000 |
| 47,273,000 | 47,274,000 | 47,275,000 | 47,276,000 | 47,277,000 | 47,278,000 | 47,279,000 | 47,280,000 |
| 47,281,000 | 47,282,000 | 47,283,000 | 47,284,000 | 47,285,000 | 47,286,000 | 47,287,000 | 47,288,000 |
| 47,289,000 | 47,290,000 | 47,291,000 | 47,292,000 | 47,293,000 | 47,294,000 | 47,295,000 | 47,296,000 |
| 47,297,000 | 47,298,000 | 47,299,000 | 47,300,000 | 47,301,000 | 47,302,000 | 47,303,000 | 47,304,000 |
| 47,305,000 | 47,306,000 | 47,307,000 | 47,308,000 | 47,309,000 | 47,310,000 | 47,311,000 | 47,312,000 |
| 47,313,000 | 47,314,000 | 47,315,000 | 47,316,000 | 47,317,000 | 47,318,000 | 47,319,000 | 47,320,000 |
| 47,321,000 | 47,322,000 | 47,323,000 | 47,324,000 | 47,325,000 | 47,326,000 | 47,327,000 | 47,328,000 |
| 47,329,000 | 47,330,000 | 47,331,000 | 47,332,000 | 47,333,000 | 47,334,000 | 47,335,000 | 47,336,000 |
| 47,337,000 | 47,338,000 | 47,339,000 | 47,340,000 | 47,341,000 | 47,342,000 | 47,343,000 | 47,344,000 |
| 47,345,000 | 47,346,000 | 47,347,000 | 47,348,000 | 47,349,000 | 47,350,000 | 47,351,000 | 47,352,000 |
| 47,353,000 | 47,354,000 | 47,355,000 | 47,356,000 | 47,357,000 | 47,358,000 | 47,359,000 | 47,360,000 |
| 47,361,000 | 47,362,000 | 47,363,000 | 47,364,000 | 47,365,000 | 47,366,000 | 47,367,000 | 47,368,000 |

NE

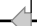

Supplemental Figure S8

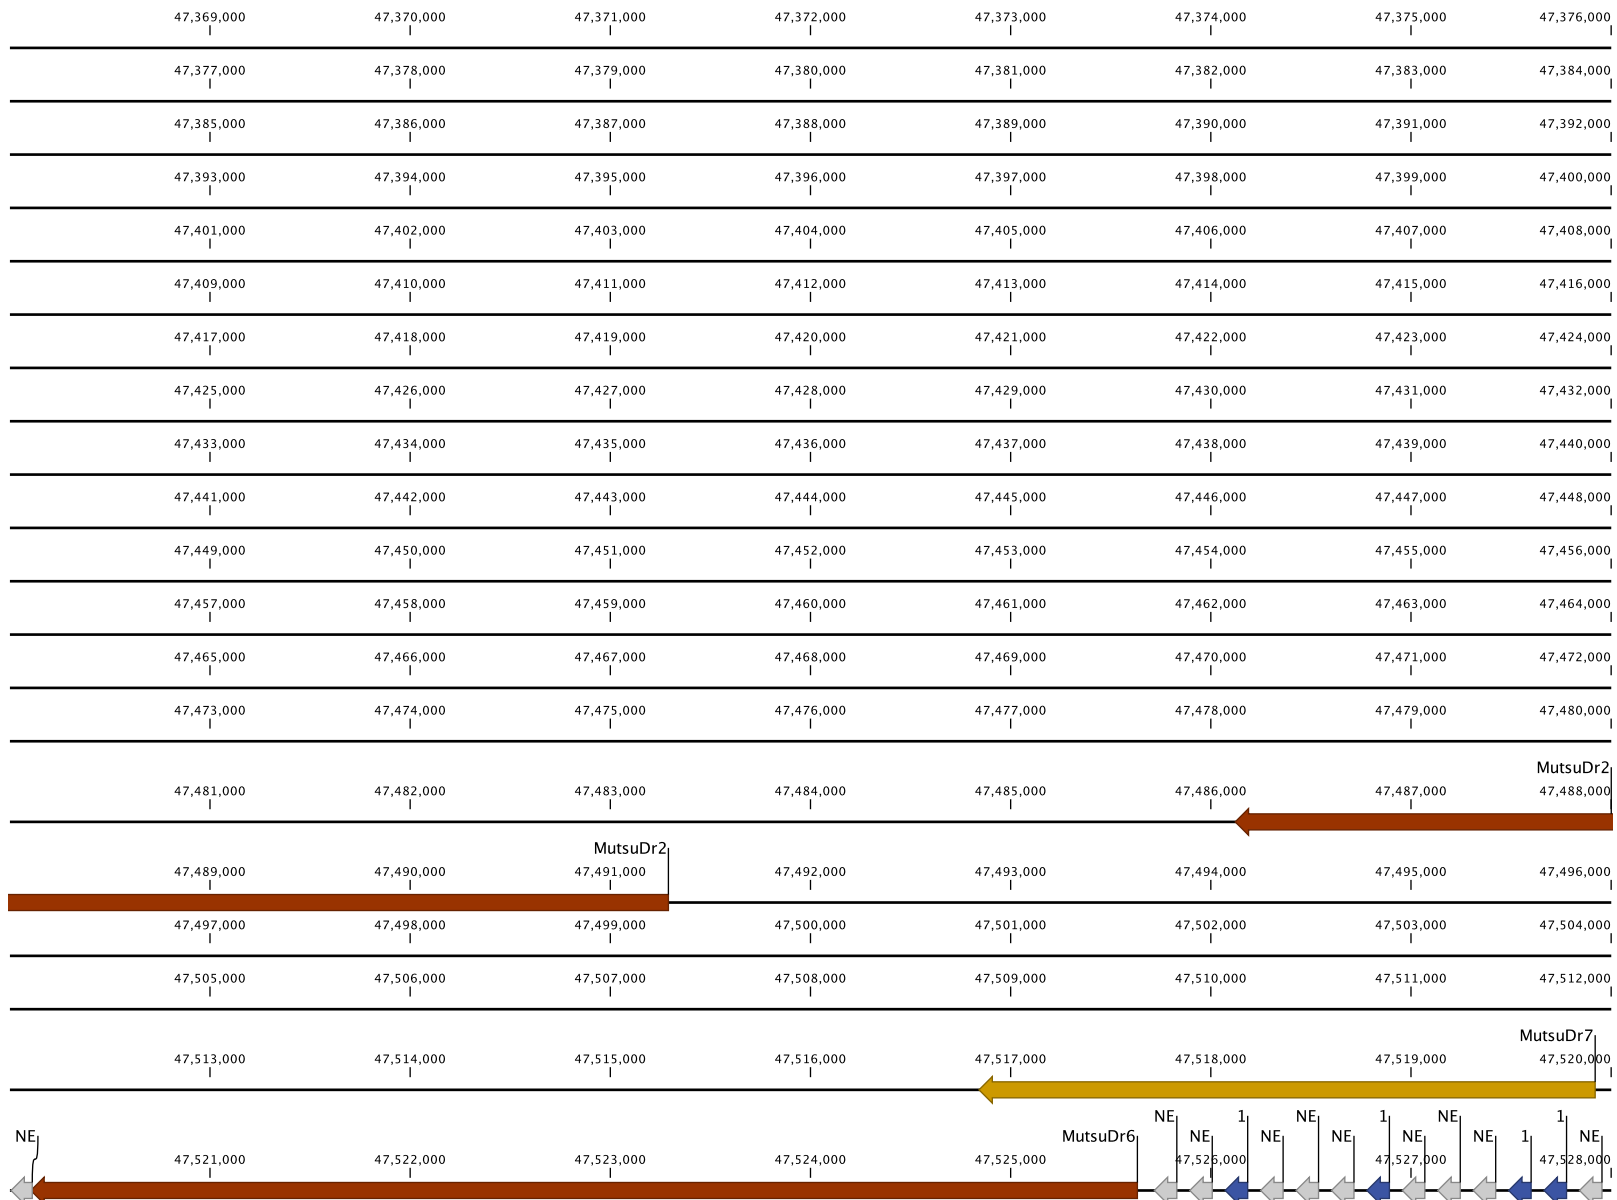

Supplemental Figure S8

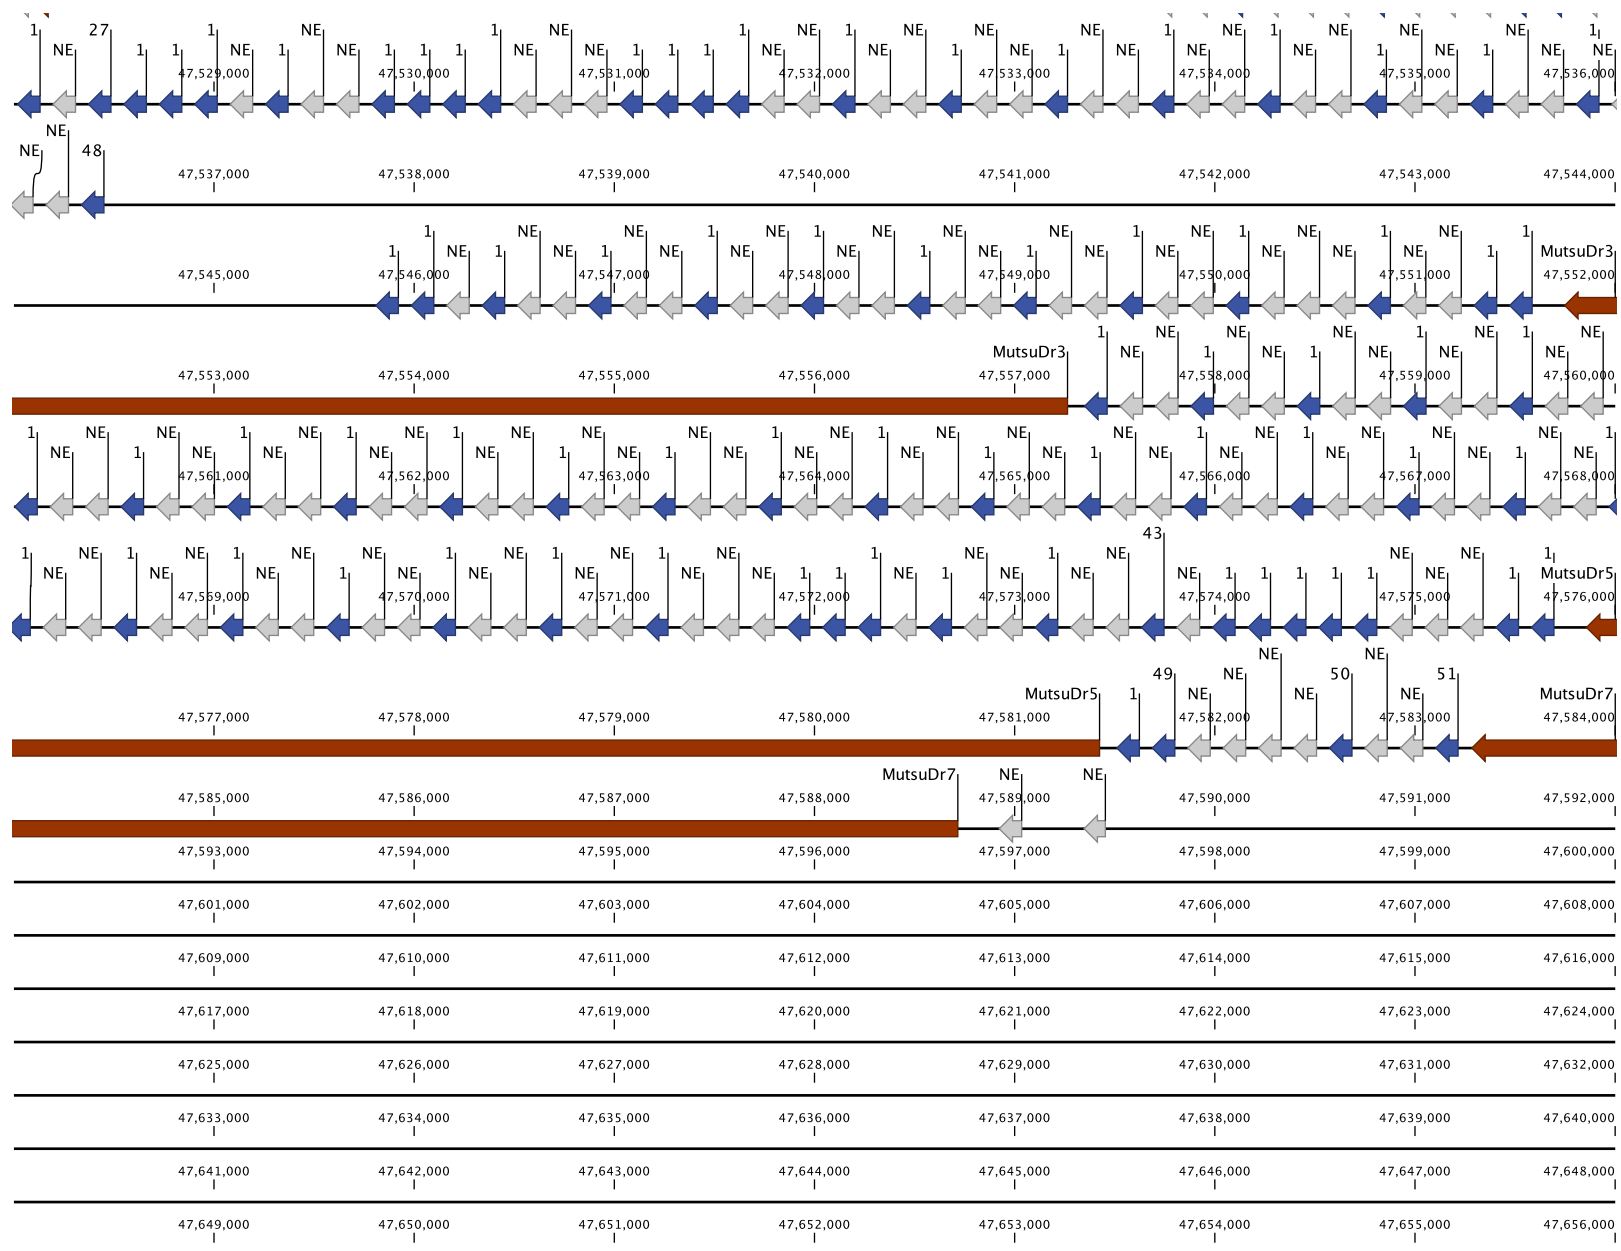

Supplemental Figure S8

|            |            |            |            |            |            |            |            |
|------------|------------|------------|------------|------------|------------|------------|------------|
| 47,657,000 | 47,658,000 | 47,659,000 | 47,660,000 | 47,661,000 | 47,662,000 | 47,663,000 | 47,664,000 |
| 47,665,000 | 47,666,000 | 47,667,000 | 47,668,000 | 47,669,000 | 47,670,000 | 47,671,000 | 47,672,000 |
| 47,673,000 | 47,674,000 | 47,675,000 | 47,676,000 | 47,677,000 | 47,678,000 | 47,679,000 | 47,680,000 |
| 47,681,000 | 47,682,000 | 47,683,000 | 47,684,000 | 47,685,000 | 47,686,000 | 47,687,000 | 47,688,000 |
| 47,689,000 | 47,690,000 | 47,691,000 | 47,692,000 | 47,693,000 | 47,694,000 | 47,695,000 | 47,696,000 |
| 47,697,000 | 47,698,000 | 47,699,000 | 47,700,000 | 47,701,000 | 47,702,000 | 47,703,000 | 47,704,000 |
| 47,705,000 | 47,706,000 | 47,707,000 | 47,708,000 | 47,709,000 | 47,710,000 | 47,711,000 | 47,712,000 |
| 47,713,000 | 47,714,000 | 47,715,000 | 47,716,000 | 47,717,000 | 47,718,000 | 47,719,000 | 47,720,000 |
| 47,721,000 | 47,722,000 | 47,723,000 | 47,724,000 | 47,725,000 | 47,726,000 | 47,727,000 | 47,728,000 |
| 47,729,000 | 47,730,000 | 47,731,000 | 47,732,000 | 47,733,000 | 47,734,000 | 47,735,000 | 47,736,000 |
| 47,737,000 | 47,738,000 | 47,739,000 | 47,740,000 | 47,741,000 | 47,742,000 | 47,743,000 | 47,744,000 |
| 47,745,000 | 47,746,000 | 47,747,000 | 47,748,000 | 47,749,000 | 47,750,000 | 47,751,000 | 47,752,000 |
| 47,753,000 | 47,754,000 | 47,755,000 | 47,756,000 | 47,757,000 | 47,758,000 | 47,759,000 | 47,760,000 |
| 47,761,000 | 47,762,000 | 47,763,000 | 47,764,000 | 47,765,000 | 47,766,000 | 47,767,000 | 47,768,000 |
| 47,769,000 | 47,770,000 | 47,771,000 | 47,772,000 | 47,773,000 | 47,774,000 | 47,775,000 | 47,776,000 |
| 47,777,000 | 47,778,000 | 47,779,000 | 47,780,000 | 47,781,000 | 47,782,000 | 47,783,000 | 47,784,000 |
| 47,785,000 | 47,786,000 | 47,787,000 | 47,788,000 | 47,789,000 | 47,790,000 | 47,791,000 | 47,792,000 |
| 47,793,000 | 47,794,000 | 47,795,000 | 47,796,000 | 47,797,000 | 47,798,000 | 47,799,000 | 47,800,000 |
| 47,801,000 | 47,802,000 | 47,803,000 | 47,804,000 | 47,805,000 | 47,806,000 | 47,807,000 | 47,808,000 |
| 47,809,000 | 47,810,000 | 47,811,000 | 47,812,000 | 47,813,000 | 47,814,000 | 47,815,000 | 47,816,000 |
| 47,817,000 | 47,818,000 | 47,819,000 | 47,820,000 | 47,821,000 | 47,822,000 | 47,823,000 | 47,824,000 |
| 47,825,000 | 47,826,000 | 47,827,000 | 47,828,000 | 47,829,000 | 47,830,000 | 47,831,000 | 47,832,000 |

NE

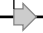

NE

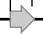

Supplemental Figure S8

|            |            |            |            |            |            |            |            |
|------------|------------|------------|------------|------------|------------|------------|------------|
| 47,833,000 | 47,834,000 | 47,835,000 | 47,836,000 | 47,837,000 | 47,838,000 | 47,839,000 | 47,840,000 |
| 47,841,000 | 47,842,000 | 47,843,000 | 47,844,000 | 47,845,000 | 47,846,000 | 47,847,000 | 47,848,000 |
| 47,849,000 | 47,850,000 | 47,851,000 | 47,852,000 | 47,853,000 | 47,854,000 | 47,855,000 | 47,856,000 |
| 47,857,000 | 47,858,000 | 47,859,000 | 47,860,000 | 47,861,000 | 47,862,000 | 47,863,000 | 47,864,000 |
| 47,865,000 | 47,866,000 | 47,867,000 | 47,868,000 | 47,869,000 | 47,870,000 | 47,871,000 | 47,872,000 |
| 47,873,000 | 47,874,000 | 47,875,000 | 47,876,000 | 47,877,000 | 47,878,000 | 47,879,000 | 47,880,000 |
| 47,881,000 | 47,882,000 | 47,883,000 | 47,884,000 | 47,885,000 | 47,886,000 | 47,887,000 | 47,888,000 |
| 47,889,000 | 47,890,000 | 47,891,000 | 47,892,000 | 47,893,000 | 47,894,000 | 47,895,000 | 47,896,000 |
| 47,897,000 | 47,898,000 | 47,899,000 | 47,900,000 | 47,901,000 | 47,902,000 | 47,903,000 | 47,904,000 |
| 47,905,000 | 47,906,000 | 47,907,000 | 47,908,000 | 47,909,000 | 47,910,000 | 47,911,000 | 47,912,000 |
| 47,913,000 | 47,914,000 | 47,915,000 | 47,916,000 | 47,917,000 | 47,918,000 | 47,919,000 | 47,920,000 |
| 47,921,000 | 47,922,000 | 47,923,000 | 47,924,000 | 47,925,000 | 47,926,000 | 47,927,000 | 47,928,000 |
| 47,929,000 | 47,930,000 | 47,931,000 | 47,932,000 | 47,933,000 | 47,934,000 | 47,935,000 | 47,936,000 |
| 47,937,000 | 47,938,000 | 47,939,000 | 47,940,000 | 47,941,000 | 47,942,000 | 47,943,000 | 47,944,000 |
| 47,945,000 | 47,946,000 | 47,947,000 | 47,948,000 | 47,949,000 | 47,950,000 | 47,951,000 | 47,952,000 |
| 47,953,000 | 47,954,000 | 47,955,000 | 47,956,000 | 47,957,000 | 47,958,000 | 47,959,000 | 47,960,000 |
| 47,961,000 | 47,962,000 | 47,963,000 | 47,964,000 | 47,965,000 | 47,966,000 | 47,967,000 | 47,968,000 |
| 47,969,000 | 47,970,000 | 47,971,000 | 47,972,000 | 47,973,000 | 47,974,000 | 47,975,000 | 47,976,000 |
| 47,977,000 | 47,978,000 | 47,979,000 | 47,980,000 | 47,981,000 | 47,982,000 | 47,983,000 | 47,984,000 |
| 47,985,000 | 47,986,000 | 47,987,000 | 47,988,000 | 47,989,000 | 47,990,000 | 47,991,000 | 47,992,000 |
| 47,993,000 | 47,994,000 | 47,995,000 | 47,996,000 | 47,997,000 | 47,998,000 | 47,999,000 | 48,000,000 |
| 48,001,000 | 48,002,000 | 48,003,000 | 48,004,000 | 48,005,000 | 48,006,000 | 48,007,000 | 48,008,000 |
| 48,009,000 | 48,010,000 | 48,011,000 | 48,012,000 | 48,013,000 | 48,014,000 | 48,015,000 | 48,016,000 |



Supplemental Figure S8

|            |            |            |            |            |            |            |            |
|------------|------------|------------|------------|------------|------------|------------|------------|
| 48,017,000 | 48,018,000 | 48,019,000 | 48,020,000 | 48,021,000 | 48,022,000 | 48,023,000 | 48,024,000 |
| 48,025,000 | 48,026,000 | 48,027,000 | 48,028,000 | 48,029,000 | 48,030,000 | 48,031,000 | 48,032,000 |
| 48,033,000 | 48,034,000 | 48,035,000 | 48,036,000 | 48,037,000 | 48,038,000 | 48,039,000 | 48,040,000 |
| 48,041,000 | 48,042,000 | 48,043,000 | 48,044,000 | 48,045,000 | 48,046,000 | 48,047,000 | 48,048,000 |
| 48,049,000 | 48,050,000 | 48,051,000 | 48,052,000 | 48,053,000 | 48,054,000 | 48,055,000 | 48,056,000 |
| 48,057,000 | 48,058,000 | 48,059,000 | 48,060,000 | 48,061,000 | 48,062,000 | 48,063,000 | 48,064,000 |
| 48,065,000 | 48,066,000 | 48,067,000 | 48,068,000 | 48,069,000 | 48,070,000 | 48,071,000 | 48,072,000 |
| 48,073,000 | 48,074,000 | 48,075,000 | 48,076,000 | 48,077,000 | 48,078,000 | 48,079,000 | 48,080,000 |
| 48,081,000 | 48,082,000 | 48,083,000 | 48,084,000 | 48,085,000 | 48,086,000 | 48,087,000 | 48,088,000 |
| 48,089,000 | 48,090,000 | 48,091,000 | 48,092,000 | 48,093,000 | 48,094,000 | 48,095,000 | 48,096,000 |
| 48,097,000 | 48,098,000 | 48,099,000 | 48,100,000 | 48,101,000 | 48,102,000 | 48,103,000 | 48,104,000 |
| 48,105,000 | 48,106,000 | 48,107,000 | 48,108,000 | 48,109,000 | 48,110,000 | 48,111,000 | 48,112,000 |
| 48,113,000 | 48,114,000 | 48,115,000 | 48,116,000 | 48,117,000 | 48,118,000 | 48,119,000 | 48,120,000 |
| 48,121,000 | 48,122,000 | 48,123,000 | 48,124,000 | 48,125,000 | 48,126,000 | 48,127,000 | 48,128,000 |
| 48,129,000 | 48,130,000 | 48,131,000 | 48,132,000 | 48,133,000 | 48,134,000 | 48,135,000 | 48,136,000 |
| 48,137,000 | 48,138,000 | 48,139,000 | 48,140,000 | 48,141,000 | 48,142,000 | 48,143,000 | 48,144,000 |
| 48,145,000 | 48,146,000 | 48,147,000 | 48,148,000 | 48,149,000 | 48,150,000 | 48,151,000 | 48,152,000 |
| 48,153,000 | 48,154,000 | 48,155,000 | 48,156,000 | 48,157,000 | 48,158,000 | 48,159,000 | 48,160,000 |
| 48,161,000 | 48,162,000 | 48,163,000 | 48,164,000 | 48,165,000 | 48,166,000 | 48,167,000 | 48,168,000 |
| 48,169,000 | 48,170,000 | 48,171,000 | 48,172,000 | 48,173,000 | 48,174,000 | 48,175,000 | 48,176,000 |
| 48,177,000 | 48,178,000 | 48,179,000 | 48,180,000 | 48,181,000 | 48,182,000 | 48,183,000 | 48,184,000 |
| 48,185,000 | 48,186,000 | 48,187,000 | 48,188,000 | 48,189,000 | 48,190,000 | 48,191,000 | 48,192,000 |
| 48,193,000 | 48,194,000 | 48,195,000 | 48,196,000 | 48,197,000 | 48,198,000 | 48,199,000 | 48,200,000 |

NE  


Supplemental Figure S8

|            |            |            |            |            |            |            |            |
|------------|------------|------------|------------|------------|------------|------------|------------|
| 48,201,000 | 48,202,000 | 48,203,000 | 48,204,000 | 48,205,000 | 48,206,000 | 48,207,000 | 48,208,000 |
| 48,209,000 | 48,210,000 | 48,211,000 | 48,212,000 | 48,213,000 | 48,214,000 | 48,215,000 | 48,216,000 |
| 48,217,000 | 48,218,000 | 48,219,000 | 48,220,000 | 48,221,000 | 48,222,000 | 48,223,000 | 48,224,000 |
| 48,225,000 | 48,226,000 | 48,227,000 | 48,228,000 | 48,229,000 | 48,230,000 | 48,231,000 | 48,232,000 |
| 48,233,000 | 48,234,000 | 48,235,000 | 48,236,000 | 48,237,000 | 48,238,000 | 48,239,000 | 48,240,000 |
| 48,241,000 | 48,242,000 | 48,243,000 | 48,244,000 | 48,245,000 | 48,246,000 | 48,247,000 | 48,248,000 |
| 48,249,000 | 48,250,000 | 48,251,000 | 48,252,000 | 48,253,000 | 48,254,000 | 48,255,000 | 48,256,000 |
| 48,257,000 | 48,258,000 | 48,259,000 | 48,260,000 | 48,261,000 | 48,262,000 | 48,263,000 | 48,264,000 |
| 48,265,000 | 48,266,000 | 48,267,000 | 48,268,000 | 48,269,000 | 48,270,000 | 48,271,000 | 48,272,000 |
| 48,273,000 | 48,274,000 | 48,275,000 | 48,276,000 | 48,277,000 | 48,278,000 | 48,279,000 | 48,280,000 |
| 48,281,000 | 48,282,000 | 48,283,000 | 48,284,000 | 48,285,000 | 48,286,000 | 48,287,000 | 48,288,000 |
| 48,289,000 | 48,290,000 | 48,291,000 | 48,292,000 | 48,293,000 | 48,294,000 | 48,295,000 | 48,296,000 |
| 48,297,000 | 48,298,000 | 48,299,000 | 48,300,000 | 48,301,000 | 48,302,000 | 48,303,000 | 48,304,000 |
| 48,305,000 | 48,306,000 | 48,307,000 | 48,308,000 | 48,309,000 | 48,310,000 | 48,311,000 | 48,312,000 |
| 48,313,000 | 48,314,000 | 48,315,000 | 48,316,000 | 48,317,000 | 48,318,000 | 48,319,000 | 48,320,000 |
| 48,321,000 | 48,322,000 | 48,323,000 | 48,324,000 | 48,325,000 | 48,326,000 | 48,327,000 | 48,328,000 |
| 48,329,000 | 48,330,000 | 48,331,000 | 48,332,000 | 48,333,000 | 48,334,000 | 48,335,000 | 48,336,000 |
| 48,337,000 | 48,338,000 | 48,339,000 | 48,340,000 | 48,341,000 | 48,342,000 | 48,343,000 | 48,344,000 |
| 48,345,000 | 48,346,000 | 48,347,000 | 48,348,000 | 48,349,000 | 48,350,000 | 48,351,000 | 48,352,000 |
| 48,353,000 | 48,354,000 | 48,355,000 | 48,356,000 | 48,357,000 | 48,358,000 | 48,359,000 | 48,360,000 |
| 48,361,000 | 48,362,000 | 48,363,000 | 48,364,000 | 48,365,000 | 48,366,000 | 48,367,000 | 48,368,000 |
| 48,369,000 | 48,370,000 | 48,371,000 | 48,372,000 | 48,373,000 | 48,374,000 | 48,375,000 | 48,376,000 |
| 48,377,000 | 48,378,000 | 48,379,000 | 48,380,000 | 48,381,000 | 48,382,000 | 48,383,000 | 48,384,000 |

Supplemental Figure S8

|            |            |            |            |            |            |            |            |
|------------|------------|------------|------------|------------|------------|------------|------------|
| 48,385,000 | 48,386,000 | 48,387,000 | 48,388,000 | 48,389,000 | 48,390,000 | 48,391,000 | 48,392,000 |
| 48,393,000 | 48,394,000 | 48,395,000 | 48,396,000 | 48,397,000 | 48,398,000 | 48,399,000 | 48,400,000 |
| 48,401,000 | 48,402,000 | 48,403,000 | 48,404,000 | 48,405,000 | 48,406,000 | 48,407,000 | 48,408,000 |
| 48,409,000 | 48,410,000 | 48,411,000 | 48,412,000 | 48,413,000 | 48,414,000 | 48,415,000 | 48,416,000 |
| 48,417,000 | 48,418,000 | 48,419,000 | 48,420,000 | 48,421,000 | 48,422,000 | 48,423,000 | 48,424,000 |
| 48,425,000 | 48,426,000 | 48,427,000 | 48,428,000 | 48,429,000 | 48,430,000 | 48,431,000 | 48,432,000 |
| 48,433,000 | 48,434,000 | 48,435,000 | 48,436,000 | 48,437,000 | 48,438,000 | 48,439,000 | 48,440,000 |
| 48,441,000 | 48,442,000 | 48,443,000 | 48,444,000 | 48,445,000 | 48,446,000 | 48,447,000 | 48,448,000 |
| 48,449,000 | 48,450,000 | 48,451,000 | 48,452,000 | 48,453,000 | 48,454,000 | 48,455,000 | 48,456,000 |
| 48,457,000 | 48,458,000 | 48,459,000 | 48,460,000 | 48,461,000 | 48,462,000 | 48,463,000 | 48,464,000 |
| 48,465,000 | 48,466,000 | 48,467,000 | 48,468,000 | 48,469,000 | 48,470,000 | 48,471,000 | 48,472,000 |
| 48,473,000 | 48,474,000 | 48,475,000 | 48,476,000 | 48,477,000 | 48,478,000 | 48,479,000 | 48,480,000 |
| 48,481,000 | 48,482,000 | 48,483,000 | 48,484,000 | 48,485,000 | 48,486,000 | 48,487,000 | 48,488,000 |
| 48,489,000 | 48,490,000 | 48,491,000 | 48,492,000 | 48,493,000 | 48,494,000 | 48,495,000 | 48,496,000 |
| 48,497,000 | 48,498,000 | 48,499,000 | 48,500,000 | 48,501,000 | 48,502,000 | 48,503,000 | 48,504,000 |
| 48,505,000 | 48,506,000 | 48,507,000 | 48,508,000 | 48,509,000 | 48,510,000 | 48,511,000 | 48,512,000 |
| 48,513,000 | 48,514,000 | 48,515,000 | 48,516,000 | 48,517,000 | 48,518,000 | 48,519,000 | 48,520,000 |
| 48,521,000 | 48,522,000 | 48,523,000 | 48,524,000 | 48,525,000 | 48,526,000 | 48,527,000 | 48,528,000 |
| 48,529,000 | 48,530,000 | 48,531,000 | 48,532,000 | 48,533,000 | 48,534,000 | 48,535,000 | 48,536,000 |
| 48,537,000 | 48,538,000 | 48,539,000 | 48,540,000 | 48,541,000 | 48,542,000 | 48,543,000 | 48,544,000 |
| 48,545,000 | 48,546,000 | 48,547,000 | 48,548,000 | 48,549,000 | 48,550,000 | 48,551,000 | 48,552,000 |
| 48,553,000 | 48,554,000 | 48,555,000 | 48,556,000 | 48,557,000 | 48,558,000 | 48,559,000 | 48,560,000 |
| 48,561,000 | 48,562,000 | 48,563,000 | 48,564,000 | 48,565,000 | 48,566,000 | 48,567,000 | 48,568,000 |

Supplemental Figure S8

|            |            |            |            |            |            |            |            |
|------------|------------|------------|------------|------------|------------|------------|------------|
| 48,569,000 | 48,570,000 | 48,571,000 | 48,572,000 | 48,573,000 | 48,574,000 | 48,575,000 | 48,576,000 |
| 48,577,000 | 48,578,000 | 48,579,000 | 48,580,000 | 48,581,000 | 48,582,000 | 48,583,000 | 48,584,000 |
| 48,585,000 | 48,586,000 | 48,587,000 | 48,588,000 | 48,589,000 | 48,590,000 | 48,591,000 | 48,592,000 |
| 48,593,000 | 48,594,000 | 48,595,000 | 48,596,000 | 48,597,000 | 48,598,000 | 48,599,000 | 48,600,000 |
| 48,601,000 | 48,602,000 | 48,603,000 | 48,604,000 | 48,605,000 | 48,606,000 | 48,607,000 | 48,608,000 |
| 48,609,000 | 48,610,000 | 48,611,000 | 48,612,000 | 48,613,000 | 48,614,000 | 48,615,000 | 48,616,000 |
| 48,617,000 | 48,618,000 | 48,619,000 | 48,620,000 | 48,621,000 | 48,622,000 | 48,623,000 | 48,624,000 |
| 48,625,000 | 48,626,000 | 48,627,000 | 48,628,000 | 48,629,000 | 48,630,000 | 48,631,000 | 48,632,000 |
| 48,633,000 | 48,634,000 | 48,635,000 | 48,636,000 | 48,637,000 | 48,638,000 | 48,639,000 | 48,640,000 |
| 48,641,000 | 48,642,000 | 48,643,000 | 48,644,000 | 48,645,000 | 48,646,000 | 48,647,000 | 48,648,000 |
| 48,649,000 | 48,650,000 | 48,651,000 | 48,652,000 | 48,653,000 | 48,654,000 | 48,655,000 | 48,656,000 |
| 48,657,000 | 48,658,000 | 48,659,000 | 48,660,000 | 48,661,000 | 48,662,000 | 48,663,000 | 48,664,000 |
| 48,665,000 | 48,666,000 | 48,667,000 | 48,668,000 | 48,669,000 | 48,670,000 | 48,671,000 | 48,672,000 |
| 48,673,000 | 48,674,000 | 48,675,000 | 48,676,000 | 48,677,000 | 48,678,000 | 48,679,000 | 48,680,000 |
| 48,681,000 | 48,682,000 | 48,683,000 | 48,684,000 | 48,685,000 | 48,686,000 | 48,687,000 | 48,688,000 |
| 48,689,000 | 48,690,000 | 48,691,000 | 48,692,000 | 48,693,000 | 48,694,000 | 48,695,000 | 48,696,000 |
| 48,697,000 | 48,698,000 | 48,699,000 | 48,700,000 | 48,701,000 | 48,702,000 | 48,703,000 | 48,704,000 |
| 48,705,000 | 48,706,000 | 48,707,000 | 48,708,000 | 48,709,000 | 48,710,000 | 48,711,000 | 48,712,000 |
| 48,713,000 | 48,714,000 | 48,715,000 | 48,716,000 | 48,717,000 | 48,718,000 | 48,719,000 | 48,720,000 |
| 48,721,000 | 48,722,000 | 48,723,000 | 48,724,000 | 48,725,000 | 48,726,000 | 48,727,000 | 48,728,000 |
| 48,729,000 | 48,730,000 | 48,731,000 | 48,732,000 | 48,733,000 | 48,734,000 | 48,735,000 | 48,736,000 |
| 48,737,000 | 48,738,000 | 48,739,000 | 48,740,000 | 48,741,000 | 48,742,000 | 48,743,000 | 48,744,000 |

Supplemental Figure S8

|            |            |            |            |            |            |            |            |
|------------|------------|------------|------------|------------|------------|------------|------------|
| 48,745,000 | 48,746,000 | 48,747,000 | 48,748,000 | 48,749,000 | 48,750,000 | 48,751,000 | 48,752,000 |
| 48,753,000 | 48,754,000 | 48,755,000 | 48,756,000 | 48,757,000 | 48,758,000 | 48,759,000 | 48,760,000 |
| 48,761,000 | 48,762,000 | 48,763,000 | 48,764,000 | 48,765,000 | 48,766,000 | 48,767,000 | 48,768,000 |
| 48,769,000 | 48,770,000 | 48,771,000 | 48,772,000 | 48,773,000 | 48,774,000 | 48,775,000 | 48,776,000 |
| 48,777,000 | 48,778,000 | 48,779,000 | 48,780,000 | 48,781,000 | 48,782,000 | 48,783,000 | 48,784,000 |
| 48,785,000 | 48,786,000 | 48,787,000 | 48,788,000 | 48,789,000 | 48,790,000 | 48,791,000 | 48,792,000 |
| 48,793,000 | 48,794,000 | 48,795,000 | 48,796,000 | 48,797,000 | 48,798,000 | 48,799,000 | 48,800,000 |
| 48,801,000 | 48,802,000 | 48,803,000 | 48,804,000 | 48,805,000 | 48,806,000 | 48,807,000 | 48,808,000 |
| 48,809,000 | 48,810,000 | 48,811,000 | 48,812,000 | 48,813,000 | 48,814,000 | 48,815,000 | 48,816,000 |
| 48,817,000 | 48,818,000 | 48,819,000 | 48,820,000 | 48,821,000 | 48,822,000 | 48,823,000 | 48,824,000 |
| 48,825,000 | 48,826,000 | 48,827,000 | 48,828,000 | 48,829,000 | 48,830,000 | 48,831,000 | 48,832,000 |
| 48,833,000 | 48,834,000 | 48,835,000 | 48,836,000 | 48,837,000 | 48,838,000 | 48,839,000 | 48,840,000 |
| 48,841,000 | 48,842,000 | 48,843,000 | 48,844,000 | 48,845,000 | 48,846,000 | 48,847,000 | 48,848,000 |
| 48,849,000 | 48,850,000 | 48,851,000 | 48,852,000 | 48,853,000 | 48,854,000 | 48,855,000 | 48,856,000 |
| 48,857,000 | 48,858,000 | 48,859,000 | 48,860,000 | 48,861,000 | 48,862,000 | 48,863,000 | 48,864,000 |
| 48,865,000 | 48,866,000 | 48,867,000 | 48,868,000 | 48,869,000 | 48,870,000 | 48,871,000 | 48,872,000 |
| 48,873,000 | 48,874,000 | 48,875,000 | 48,876,000 | 48,877,000 | 48,878,000 | 48,879,000 | 48,880,000 |
| 48,881,000 | 48,882,000 | 48,883,000 | 48,884,000 | 48,885,000 | 48,886,000 | 48,887,000 | 48,888,000 |
| 48,889,000 | 48,890,000 | 48,891,000 | 48,892,000 | 48,893,000 | 48,894,000 | 48,895,000 | 48,896,000 |
| 48,897,000 | 48,898,000 | 48,899,000 | 48,900,000 | 48,901,000 | 48,902,000 | 48,903,000 | 48,904,000 |
| 48,905,000 | 48,906,000 | 48,907,000 | 48,908,000 | 48,909,000 | 48,910,000 | 48,911,000 | 48,912,000 |
| 48,913,000 | 48,914,000 | 48,915,000 | 48,916,000 | 48,917,000 | 48,918,000 | 48,919,000 | 48,920,000 |
| 48,921,000 | 48,922,000 | 48,923,000 | 48,924,000 | 48,925,000 | 48,926,000 | 48,927,000 | 48,928,000 |

Supplemental Figure S8

|            |            |            |            |            |            |            |            |
|------------|------------|------------|------------|------------|------------|------------|------------|
| 48,929,000 | 48,930,000 | 48,931,000 | 48,932,000 | 48,933,000 | 48,934,000 | 48,935,000 | 48,936,000 |
| 48,937,000 | 48,938,000 | 48,939,000 | 48,940,000 | 48,941,000 | 48,942,000 | 48,943,000 | 48,944,000 |
| 48,945,000 | 48,946,000 | 48,947,000 | 48,948,000 | 48,949,000 | 48,950,000 | 48,951,000 | 48,952,000 |
| 48,953,000 | 48,954,000 | 48,955,000 | 48,956,000 | 48,957,000 | 48,958,000 | 48,959,000 | 48,960,000 |
| 48,961,000 | 48,962,000 | 48,963,000 | 48,964,000 | 48,965,000 | 48,966,000 | 48,967,000 | 48,968,000 |
| 48,969,000 | 48,970,000 | 48,971,000 | 48,972,000 | 48,973,000 | 48,974,000 | 48,975,000 | 48,976,000 |
| 48,977,000 | 48,978,000 | 48,979,000 | 48,980,000 | 48,981,000 | 48,982,000 | 48,983,000 | 48,984,000 |
| 48,985,000 | 48,986,000 | 48,987,000 | 48,988,000 | 48,989,000 | 48,990,000 | 48,991,000 | 48,992,000 |
| 48,993,000 | 48,994,000 | 48,995,000 | 48,996,000 | 48,997,000 | 48,998,000 | 48,999,000 | 49,000,000 |
| 49,001,000 | 49,002,000 | 49,003,000 | 49,004,000 | 49,005,000 | 49,006,000 | 49,007,000 | 49,008,000 |
| 49,009,000 | 49,010,000 | 49,011,000 | 49,012,000 | 49,013,000 | 49,014,000 | 49,015,000 | 49,016,000 |
| 49,017,000 | 49,018,000 | 49,019,000 | 49,020,000 | 49,021,000 | 49,022,000 | 49,023,000 | 49,024,000 |
| 49,025,000 | 49,026,000 | 49,027,000 | 49,028,000 | 49,029,000 | 49,030,000 | 49,031,000 | 49,032,000 |
| 49,033,000 | 49,034,000 | 49,035,000 | 49,036,000 | 49,037,000 | 49,038,000 | 49,039,000 | 49,040,000 |
| 49,041,000 | 49,042,000 | 49,043,000 | 49,044,000 | 49,045,000 | 49,046,000 | 49,047,000 | 49,048,000 |
| 49,049,000 | 49,050,000 | 49,051,000 | 49,052,000 | 49,053,000 | 49,054,000 | 49,055,000 | 49,056,000 |
| 49,057,000 | 49,058,000 | 49,059,000 | 49,060,000 | 49,061,000 | 49,062,000 | 49,063,000 | 49,064,000 |
| 49,065,000 | 49,066,000 | 49,067,000 | 49,068,000 | 49,069,000 | 49,070,000 | 49,071,000 | 49,072,000 |
| 49,073,000 | 49,074,000 | 49,075,000 | 49,076,000 | 49,077,000 | 49,078,000 | 49,079,000 | 49,080,000 |
| 49,081,000 | 49,082,000 | 49,083,000 | 49,084,000 | 49,085,000 | 49,086,000 | 49,087,000 | 49,088,000 |
| 49,089,000 | 49,090,000 | 49,091,000 | 49,092,000 | 49,093,000 | 49,094,000 | 49,095,000 | 49,096,000 |
| 49,097,000 | 49,098,000 | 49,099,000 | 49,100,000 | 49,101,000 | 49,102,000 | 49,103,000 | 49,104,000 |
| 49,105,000 | 49,106,000 | 49,107,000 | 49,108,000 | 49,109,000 | 49,110,000 | 49,111,000 | 49,112,000 |

Supplemental Figure S8

|            |            |            |            |            |            |            |            |
|------------|------------|------------|------------|------------|------------|------------|------------|
| 49,113,000 | 49,114,000 | 49,115,000 | 49,116,000 | 49,117,000 | 49,118,000 | 49,119,000 | 49,120,000 |
| 49,121,000 | 49,122,000 | 49,123,000 | 49,124,000 | 49,125,000 | 49,126,000 | 49,127,000 | 49,128,000 |
| 49,129,000 | 49,130,000 | 49,131,000 | 49,132,000 | 49,133,000 | 49,134,000 | 49,135,000 | 49,136,000 |
| 49,137,000 | 49,138,000 | 49,139,000 | 49,140,000 | 49,141,000 | 49,142,000 | 49,143,000 | 49,144,000 |
| 49,145,000 | 49,146,000 | 49,147,000 | 49,148,000 | 49,149,000 | 49,150,000 | 49,151,000 | 49,152,000 |
| 49,153,000 | 49,154,000 | 49,155,000 | 49,156,000 | 49,157,000 | 49,158,000 | 49,159,000 | 49,160,000 |
| 49,161,000 | 49,162,000 | 49,163,000 | 49,164,000 | 49,165,000 | 49,166,000 | 49,167,000 | 49,168,000 |
| 49,169,000 | 49,170,000 | 49,171,000 | 49,172,000 | 49,173,000 | 49,174,000 | 49,175,000 | 49,176,000 |
| 49,177,000 | 49,178,000 | 49,179,000 | 49,180,000 | 49,181,000 | 49,182,000 | 49,183,000 | 49,184,000 |
| 49,185,000 | 49,186,000 | 49,187,000 | 49,188,000 | 49,189,000 | 49,190,000 | 49,191,000 | 49,192,000 |
| 49,193,000 | 49,194,000 | 49,195,000 | 49,196,000 | 49,197,000 | 49,198,000 | 49,199,000 | 49,200,000 |
| 49,201,000 | 49,202,000 | 49,203,000 | 49,204,000 | 49,205,000 | 49,206,000 | 49,207,000 | 49,208,000 |
| 49,209,000 | 49,210,000 | 49,211,000 | 49,212,000 | 49,213,000 | 49,214,000 | 49,215,000 | 49,216,000 |
| 49,217,000 | 49,218,000 | 49,219,000 | 49,220,000 | 49,221,000 | 49,222,000 | 49,223,000 | 49,224,000 |
| 49,225,000 | 49,226,000 | 49,227,000 | 49,228,000 | 49,229,000 | 49,230,000 | 49,231,000 | 49,232,000 |
| 49,233,000 | 49,234,000 | 49,235,000 | 49,236,000 | 49,237,000 | 49,238,000 | 49,239,000 | 49,240,000 |
| 49,241,000 | 49,242,000 | 49,243,000 | 49,244,000 | 49,245,000 | 49,246,000 | 49,247,000 | 49,248,000 |
| 49,249,000 | 49,250,000 | 49,251,000 | 49,252,000 | 49,253,000 | 49,254,000 | 49,255,000 | 49,256,000 |
| 49,257,000 | 49,258,000 | 49,259,000 | 49,260,000 | 49,261,000 | 49,262,000 | 49,263,000 | 49,264,000 |
| 49,265,000 | 49,266,000 | 49,267,000 | 49,268,000 | 49,269,000 | 49,270,000 | 49,271,000 | 49,272,000 |
| 49,273,000 | 49,274,000 | 49,275,000 | 49,276,000 | 49,277,000 | 49,278,000 | 49,279,000 | 49,280,000 |
| 49,281,000 | 49,282,000 | 49,283,000 | 49,284,000 | 49,285,000 | 49,286,000 | 49,287,000 | 49,288,000 |
| 49,289,000 | 49,290,000 | 49,291,000 | 49,292,000 | 49,293,000 | 49,294,000 | 49,295,000 | 49,296,000 |

Supplemental Figure S8

|            |            |            |            |            |            |            |            |
|------------|------------|------------|------------|------------|------------|------------|------------|
| 49,297,000 | 49,298,000 | 49,299,000 | 49,300,000 | 49,301,000 | 49,302,000 | 49,303,000 | 49,304,000 |
| 49,305,000 | 49,306,000 | 49,307,000 | 49,308,000 | 49,309,000 | 49,310,000 | 49,311,000 | 49,312,000 |
| 49,313,000 | 49,314,000 | 49,315,000 | 49,316,000 | 49,317,000 | 49,318,000 | 49,319,000 | 49,320,000 |
| 49,321,000 | 49,322,000 | 49,323,000 | 49,324,000 | 49,325,000 | 49,326,000 | 49,327,000 | 49,328,000 |
| 49,329,000 | 49,330,000 | 49,331,000 | 49,332,000 | 49,333,000 | 49,334,000 | 49,335,000 | 49,336,000 |
| 49,337,000 | 49,338,000 | 49,339,000 | 49,340,000 | 49,341,000 | 49,342,000 | 49,343,000 | 49,344,000 |
| 49,345,000 | 49,346,000 | 49,347,000 | 49,348,000 | 49,349,000 | 49,350,000 | 49,351,000 | 49,352,000 |
| 49,353,000 | 49,354,000 | 49,355,000 | 49,356,000 | 49,357,000 | 49,358,000 | 49,359,000 | 49,360,000 |
| 49,361,000 | 49,362,000 | 49,363,000 | 49,364,000 | 49,365,000 | 49,366,000 | 49,367,000 | 49,368,000 |
| 49,369,000 | 49,370,000 | 49,371,000 | 49,372,000 | 49,373,000 | 49,374,000 | 49,375,000 | 49,376,000 |
| 49,377,000 | 49,378,000 | 49,379,000 | 49,380,000 | 49,381,000 | 49,382,000 | 49,383,000 | 49,384,000 |
| 49,385,000 | 49,386,000 | 49,387,000 | 49,388,000 | 49,389,000 | 49,390,000 | 49,391,000 | 49,392,000 |
| 49,393,000 | 49,394,000 | 49,395,000 | 49,396,000 | 49,397,000 | 49,398,000 | 49,399,000 | 49,400,000 |
| 49,401,000 | 49,402,000 | 49,403,000 | 49,404,000 | 49,405,000 | 49,406,000 | 49,407,000 | 49,408,000 |
| 49,409,000 | 49,410,000 | 49,411,000 | 49,412,000 | 49,413,000 | 49,414,000 | 49,415,000 | 49,416,000 |
| 49,417,000 | 49,418,000 | 49,419,000 | 49,420,000 | 49,421,000 | 49,422,000 | 49,423,000 | 49,424,000 |
| 49,425,000 | 49,426,000 | 49,427,000 | 49,428,000 | 49,429,000 | 49,430,000 | 49,431,000 | 49,432,000 |
| 49,433,000 | 49,434,000 | 49,435,000 | 49,436,000 | 49,437,000 | 49,438,000 | 49,439,000 | 49,440,000 |
| 49,441,000 | 49,442,000 | 49,443,000 | 49,444,000 | 49,445,000 | 49,446,000 | 49,447,000 | 49,448,000 |
| 49,449,000 | 49,450,000 | 49,451,000 | 49,452,000 | 49,453,000 | 49,454,000 | 49,455,000 | 49,456,000 |
| 49,457,000 | 49,458,000 | 49,459,000 | 49,460,000 | 49,461,000 | 49,462,000 | 49,463,000 | 49,464,000 |
| 49,465,000 | 49,466,000 | 49,467,000 | 49,468,000 | 49,469,000 | 49,470,000 | 49,471,000 | 49,472,000 |
| 49,473,000 | 49,474,000 | 49,475,000 | 49,476,000 | 49,477,000 | 49,478,000 | 49,479,000 | 49,480,000 |

NE  
↓



Supplemental Figure S8

|            |            |            |            |            |            |            |            |
|------------|------------|------------|------------|------------|------------|------------|------------|
| 49,481,000 | 49,482,000 | 49,483,000 | 49,484,000 | 49,485,000 | 49,486,000 | 49,487,000 | 49,488,000 |
| 49,489,000 | 49,490,000 | 49,491,000 | 49,492,000 | 49,493,000 | 49,494,000 | 49,495,000 | 49,496,000 |
| 49,497,000 | 49,498,000 | 49,499,000 | 49,500,000 | 49,501,000 | 49,502,000 | 49,503,000 | 49,504,000 |
| 49,505,000 | 49,506,000 | 49,507,000 | 49,508,000 | 49,509,000 | 49,510,000 | 49,511,000 | 49,512,000 |
| 49,513,000 | 49,514,000 | 49,515,000 | 49,516,000 | 49,517,000 | 49,518,000 | 49,519,000 | 49,520,000 |
| 49,521,000 | 49,522,000 | 49,523,000 | 49,524,000 | 49,525,000 | 49,526,000 | 49,527,000 | 49,528,000 |
| 49,529,000 | 49,530,000 | 49,531,000 | 49,532,000 | 49,533,000 | 49,534,000 | 49,535,000 | 49,536,000 |
| 49,537,000 | 49,538,000 | 49,539,000 | 49,540,000 | 49,541,000 | 49,542,000 | 49,543,000 | 49,544,000 |
| 49,545,000 | 49,546,000 | 49,547,000 | 49,548,000 | 49,549,000 | 49,550,000 | 49,551,000 | 49,552,000 |
| 49,553,000 | 49,554,000 | 49,555,000 | 49,556,000 | 49,557,000 | 49,558,000 | 49,559,000 | 49,560,000 |
| 49,561,000 | 49,562,000 | 49,563,000 | 49,564,000 | 49,565,000 | 49,566,000 | 49,567,000 | 49,568,000 |
| 49,569,000 | 49,570,000 | 49,571,000 | 49,572,000 | 49,573,000 | 49,574,000 | 49,575,000 | 49,576,000 |
| 49,577,000 | 49,578,000 | 49,579,000 | 49,580,000 | 49,581,000 | 49,582,000 | 49,583,000 | 49,584,000 |
| 49,585,000 | 49,586,000 | 49,587,000 | 49,588,000 | 49,589,000 | 49,590,000 | 49,591,000 | 49,592,000 |
| 49,593,000 | 49,594,000 | 49,595,000 | 49,596,000 | 49,597,000 | 49,598,000 | 49,599,000 | 49,600,000 |
| 49,601,000 | 49,602,000 | 49,603,000 | 49,604,000 | 49,605,000 | 49,606,000 | 49,607,000 | 49,608,000 |
| 49,609,000 | 49,610,000 | 49,611,000 | 49,612,000 | 49,613,000 | 49,614,000 | 49,615,000 | 49,616,000 |
| 49,617,000 | 49,618,000 | 49,619,000 | 49,620,000 | 49,621,000 | 49,622,000 | 49,623,000 | 49,624,000 |
| 49,625,000 | 49,626,000 | 49,627,000 | 49,628,000 | 49,629,000 | 49,630,000 | 49,631,000 | 49,632,000 |
| 49,633,000 | 49,634,000 | 49,635,000 | 49,636,000 | 49,637,000 | 49,638,000 | 49,639,000 | 49,640,000 |
| 49,641,000 | 49,642,000 | 49,643,000 | 49,644,000 | 49,645,000 | 49,646,000 | 49,647,000 | 49,648,000 |
| 49,649,000 | 49,650,000 | 49,651,000 | 49,652,000 | 49,653,000 | 49,654,000 | 49,655,000 | 49,656,000 |
| 49,657,000 | 49,658,000 | 49,659,000 | 49,660,000 | 49,661,000 | 49,662,000 | 49,663,000 | 49,664,000 |

Supplemental Figure S8

|            |            |            |            |            |            |            |            |
|------------|------------|------------|------------|------------|------------|------------|------------|
| 49,665,000 | 49,666,000 | 49,667,000 | 49,668,000 | 49,669,000 | 49,670,000 | 49,671,000 | 49,672,000 |
| 49,673,000 | 49,674,000 | 49,675,000 | 49,676,000 | 49,677,000 | 49,678,000 | 49,679,000 | 49,680,000 |
| 49,681,000 | 49,682,000 | 49,683,000 | 49,684,000 | 49,685,000 | 49,686,000 | 49,687,000 | 49,688,000 |
| 49,689,000 | 49,690,000 | 49,691,000 | 49,692,000 | 49,693,000 | 49,694,000 | 49,695,000 | 49,696,000 |
| 49,697,000 | 49,698,000 | 49,699,000 | 49,700,000 | 49,701,000 | 49,702,000 | 49,703,000 | 49,704,000 |
| 49,705,000 | 49,706,000 | 49,707,000 | 49,708,000 | 49,709,000 | 49,710,000 | 49,711,000 | 49,712,000 |
| 49,713,000 | 49,714,000 | 49,715,000 | 49,716,000 | 49,717,000 | 49,718,000 | 49,719,000 | 49,720,000 |
| 49,721,000 | 49,722,000 | 49,723,000 | 49,724,000 | 49,725,000 | 49,726,000 | 49,727,000 | 49,728,000 |
| 49,729,000 | 49,730,000 | 49,731,000 | 49,732,000 | 49,733,000 | 49,734,000 | 49,735,000 | 49,736,000 |
| 49,737,000 | 49,738,000 | 49,739,000 | 49,740,000 | 49,741,000 | 49,742,000 | 49,743,000 | 49,744,000 |
| 49,745,000 | 49,746,000 | 49,747,000 | 49,748,000 | 49,749,000 | 49,750,000 | 49,751,000 | 49,752,000 |
| 49,753,000 | 49,754,000 | 49,755,000 | 49,756,000 | 49,757,000 | 49,758,000 | 49,759,000 | 49,760,000 |
| 49,761,000 | 49,762,000 | 49,763,000 | 49,764,000 | 49,765,000 | 49,766,000 | 49,767,000 | 49,768,000 |
| 49,769,000 | 49,770,000 | 49,771,000 | 49,772,000 | 49,773,000 | 49,774,000 | 49,775,000 | 49,776,000 |
| 49,777,000 | 49,778,000 | 49,779,000 | 49,780,000 | 49,781,000 | 49,782,000 | 49,783,000 | 49,784,000 |
| 49,785,000 | 49,786,000 | 49,787,000 | 49,788,000 | 49,789,000 | 49,790,000 | 49,791,000 | 49,792,000 |
| 49,793,000 | 49,794,000 | 49,795,000 | 49,796,000 | 49,797,000 | 49,798,000 | 49,799,000 | 49,800,000 |
| 49,801,000 | 49,802,000 | 49,803,000 | 49,804,000 | 49,805,000 | 49,806,000 | 49,807,000 | 49,808,000 |
| 49,809,000 | 49,810,000 | 49,811,000 | 49,812,000 | 49,813,000 | 49,814,000 | 49,815,000 | 49,816,000 |
| 49,817,000 | 49,818,000 | 49,819,000 | 49,820,000 | 49,821,000 | 49,822,000 | 49,823,000 | 49,824,000 |
| 49,825,000 | 49,826,000 | 49,827,000 | 49,828,000 | 49,829,000 | 49,830,000 | 49,831,000 | 49,832,000 |
| 49,833,000 | 49,834,000 | 49,835,000 | 49,836,000 | 49,837,000 | 49,838,000 | 49,839,000 | 49,840,000 |
| 49,841,000 | 49,842,000 | 49,843,000 | 49,844,000 | 49,845,000 | 49,846,000 | 49,847,000 | 49,848,000 |

Supplemental Figure S8

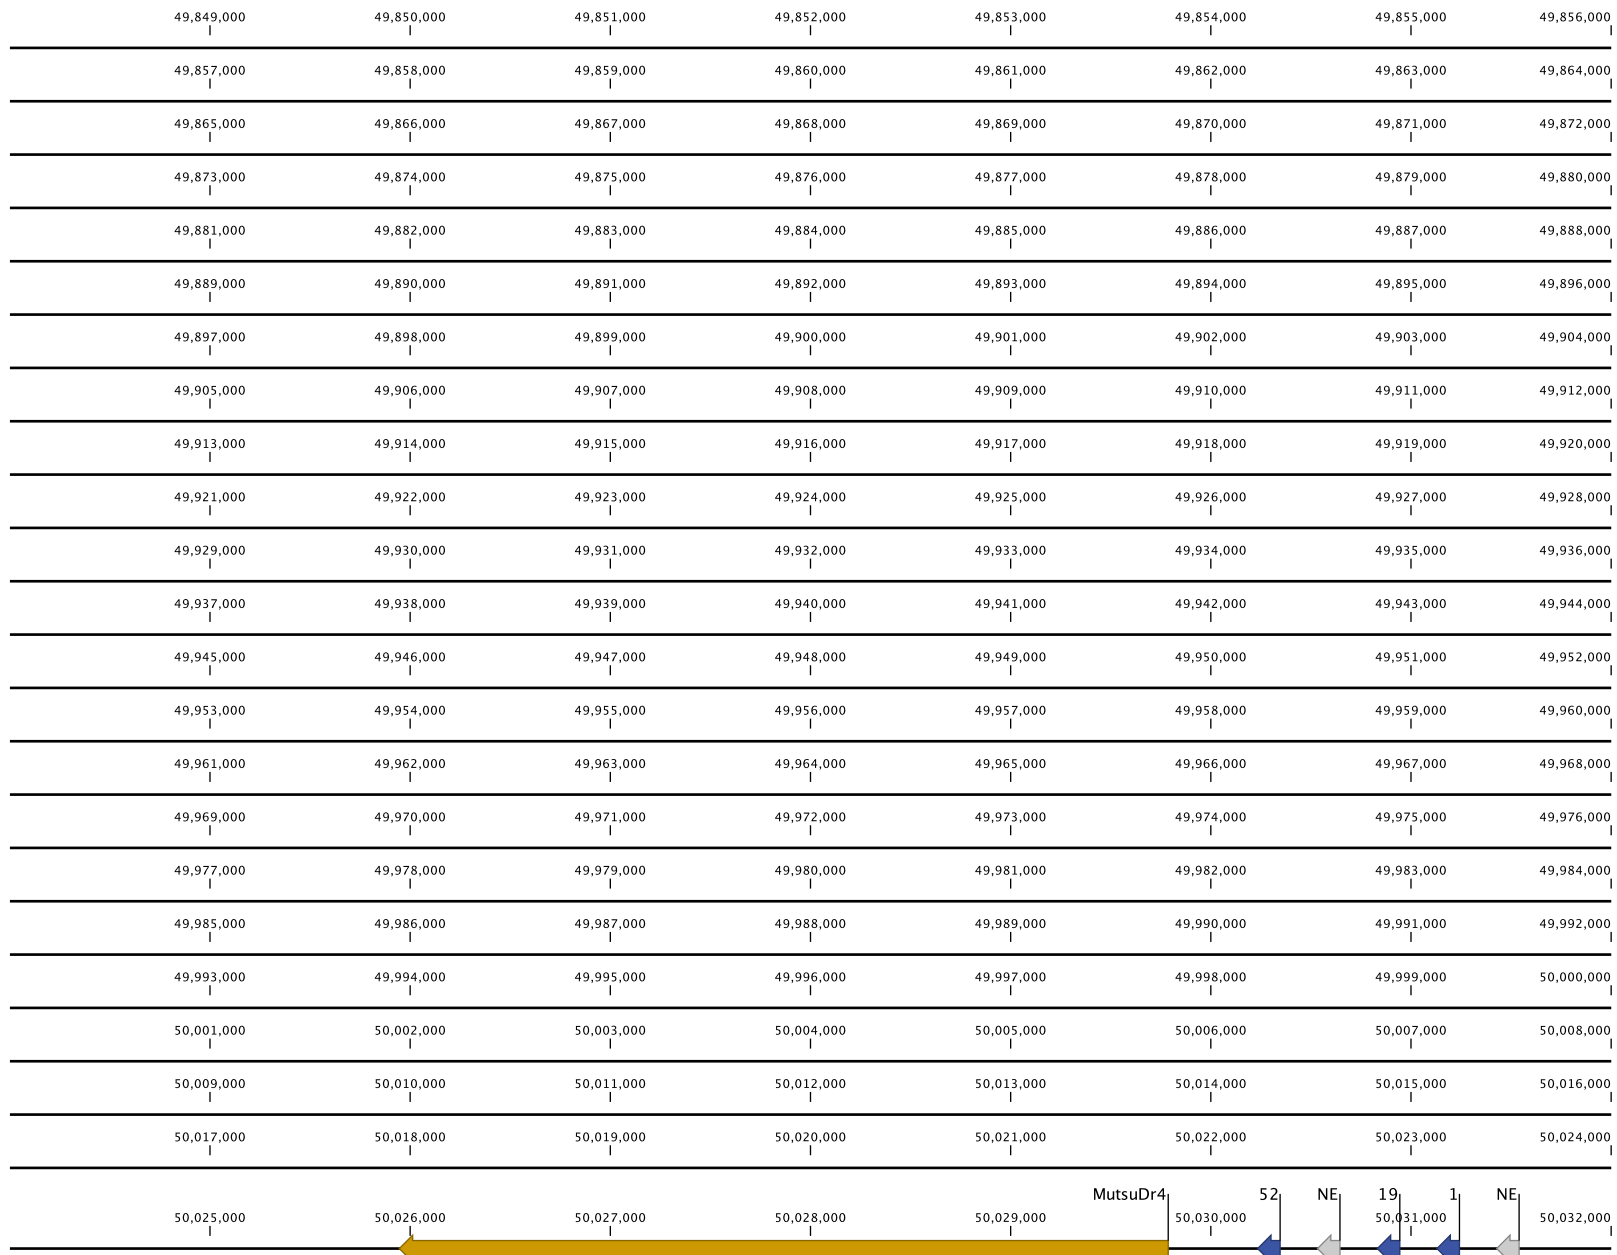

Supplemental Figure S8

|            |            |            |            |            |            |            |            |
|------------|------------|------------|------------|------------|------------|------------|------------|
| 50,033,000 | 50,034,000 | 50,035,000 | 50,036,000 | 50,037,000 | 50,038,000 | 50,039,000 | 50,040,000 |
| 50,041,000 | 50,042,000 | 50,043,000 | 50,044,000 | 50,045,000 | 50,046,000 | 50,047,000 | 50,048,000 |
| 50,049,000 | 50,050,000 | 50,051,000 | 50,052,000 | 50,053,000 | 50,054,000 | 50,055,000 | 50,056,000 |
| 50,057,000 | 50,058,000 | 50,059,000 | 50,060,000 | 50,061,000 | 50,062,000 | 50,063,000 | 50,064,000 |
| 50,065,000 | 50,066,000 | 50,067,000 | 50,068,000 | 50,069,000 | 50,070,000 | 50,071,000 | 50,072,000 |
| 50,073,000 | 50,074,000 | 50,075,000 | 50,076,000 | 50,077,000 | 50,078,000 | 50,079,000 | 50,080,000 |
| 50,081,000 | 50,082,000 | 50,083,000 | 50,084,000 | 50,085,000 | 50,086,000 | 50,087,000 | 50,088,000 |
| 50,089,000 | 50,090,000 | 50,091,000 | 50,092,000 | 50,093,000 | 50,094,000 | 50,095,000 | 50,096,000 |
| 50,097,000 | 50,098,000 | 50,099,000 | 50,100,000 | 50,101,000 | 50,102,000 | 50,103,000 | 50,104,000 |
| 50,105,000 | 50,106,000 | 50,107,000 | 50,108,000 | 50,109,000 | 50,110,000 | 50,111,000 | 50,112,000 |
| 50,113,000 | 50,114,000 | 50,115,000 | 50,116,000 | 50,117,000 | 50,118,000 | 50,119,000 | 50,120,000 |
| 50,121,000 | 50,122,000 | 50,123,000 | 50,124,000 | 50,125,000 | 50,126,000 | 50,127,000 | 50,128,000 |
| 50,129,000 | 50,130,000 | 50,131,000 | 50,132,000 | 50,133,000 | 50,134,000 | 50,135,000 | 50,136,000 |
| 50,137,000 | 50,138,000 | 50,139,000 | 50,140,000 | 50,141,000 | 50,142,000 | 50,143,000 | 50,144,000 |
| 50,145,000 | 50,146,000 | 50,147,000 | 50,148,000 | 50,149,000 | 50,150,000 | 50,151,000 | 50,152,000 |
| 50,153,000 | 50,154,000 | 50,155,000 | 50,156,000 | 50,157,000 | 50,158,000 | 50,159,000 | 50,160,000 |
| 50,161,000 | 50,162,000 | 50,163,000 | 50,164,000 | 50,165,000 | 50,166,000 | 50,167,000 | 50,168,000 |
| 50,169,000 | 50,170,000 | 50,171,000 | 50,172,000 | 50,173,000 | 50,174,000 | 50,175,000 | 50,176,000 |
| 50,177,000 | 50,178,000 | 50,179,000 | 50,180,000 | 50,181,000 | 50,182,000 | 50,183,000 | 50,184,000 |
| 50,185,000 | 50,186,000 | 50,187,000 | 50,188,000 | 50,189,000 | 50,190,000 | 50,191,000 | 50,192,000 |
| 50,193,000 | 50,194,000 | 50,195,000 | 50,196,000 | 50,197,000 | 50,198,000 | 50,199,000 | 50,200,000 |
| 50,201,000 | 50,202,000 | 50,203,000 | 50,204,000 | 50,205,000 | 50,206,000 | 50,207,000 | 50,208,000 |
| 50,209,000 | 50,210,000 | 50,211,000 | 50,212,000 | 50,213,000 | 50,214,000 | 50,215,000 | 50,216,000 |

NE

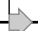

Supplemental Figure S8

|            |            |            |            |            |            |            |            |
|------------|------------|------------|------------|------------|------------|------------|------------|
| 50,217,000 | 50,218,000 | 50,219,000 | 50,220,000 | 50,221,000 | 50,222,000 | 50,223,000 | 50,224,000 |
| 50,225,000 | 50,226,000 | 50,227,000 | 50,228,000 | 50,229,000 | 50,230,000 | 50,231,000 | 50,232,000 |
| 50,233,000 | 50,234,000 | 50,235,000 | 50,236,000 | 50,237,000 | 50,238,000 | 50,239,000 | 50,240,000 |
| 50,241,000 | 50,242,000 | 50,243,000 | 50,244,000 | 50,245,000 | 50,246,000 | 50,247,000 | 50,248,000 |
| 50,249,000 | 50,250,000 | 50,251,000 | 50,252,000 | 50,253,000 | 50,254,000 | 50,255,000 | 50,256,000 |
| 50,257,000 | 50,258,000 | 50,259,000 | 50,260,000 | 50,261,000 | 50,262,000 | 50,263,000 | 50,264,000 |
| 50,265,000 | 50,266,000 | 50,267,000 | 50,268,000 | 50,269,000 | 50,270,000 | 50,271,000 | 50,272,000 |
| 50,273,000 | 50,274,000 | 50,275,000 | 50,276,000 | 50,277,000 | 50,278,000 | 50,279,000 | 50,280,000 |
| 50,281,000 | 50,282,000 | 50,283,000 | 50,284,000 | 50,285,000 | 50,286,000 | 50,287,000 | 50,288,000 |
| 50,289,000 | 50,290,000 | 50,291,000 | 50,292,000 | 50,293,000 | 50,294,000 | 50,295,000 | 50,296,000 |
| 50,297,000 | 50,298,000 | 50,299,000 | 50,300,000 | 50,301,000 | 50,302,000 | 50,303,000 | 50,304,000 |
| 50,305,000 | 50,306,000 | 50,307,000 | 50,308,000 | 50,309,000 | 50,310,000 | 50,311,000 | 50,312,000 |
| 50,313,000 | 50,314,000 | 50,315,000 | 50,316,000 | 50,317,000 | 50,318,000 | 50,319,000 | 50,320,000 |
| 50,321,000 | 50,322,000 | 50,323,000 | 50,324,000 | 50,325,000 | 50,326,000 | 50,327,000 | 50,328,000 |
| 50,329,000 | 50,330,000 | 50,331,000 | 50,332,000 | 50,333,000 | 50,334,000 | 50,335,000 | 50,336,000 |
| 50,337,000 | 50,338,000 | 50,339,000 | 50,340,000 | 50,341,000 | 50,342,000 | 50,343,000 | 50,344,000 |
| 50,345,000 | 50,346,000 | 50,347,000 | 50,348,000 | 50,349,000 | 50,350,000 | 50,351,000 | 50,352,000 |
| 50,353,000 | 50,354,000 | 50,355,000 | 50,356,000 | 50,357,000 | 50,358,000 | 50,359,000 | 50,360,000 |
| 50,361,000 | 50,362,000 | 50,363,000 | 50,364,000 | 50,365,000 | 50,366,000 | 50,367,000 | 50,368,000 |
| 50,369,000 | 50,370,000 | 50,371,000 | 50,372,000 | 50,373,000 | 50,374,000 | 50,375,000 | 50,376,000 |
| 50,377,000 | 50,378,000 | 50,379,000 | 50,380,000 | 50,381,000 | 50,382,000 | 50,383,000 | 50,384,000 |
| 50,385,000 | 50,386,000 | 50,387,000 | 50,388,000 | 50,389,000 | 50,390,000 | 50,391,000 | 50,392,000 |

NE

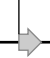

Supplemental Figure S8

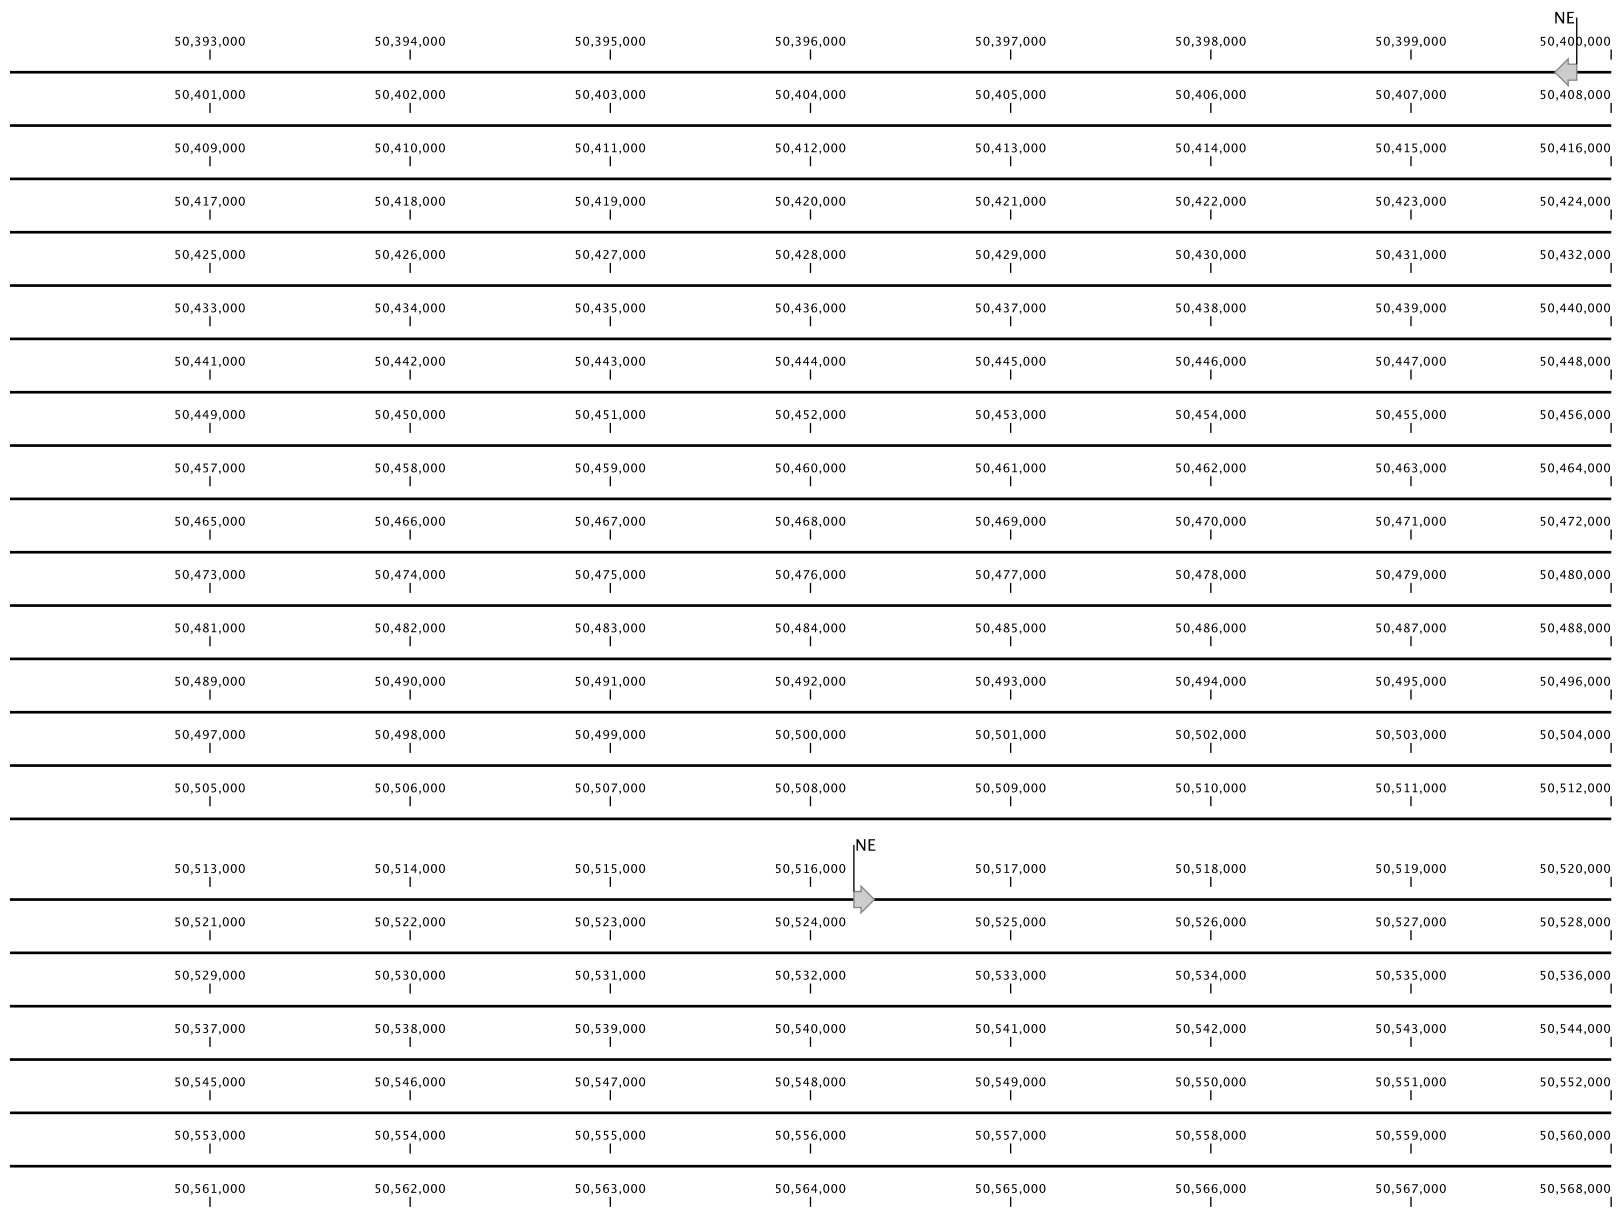

Supplemental Figure S8

|            |            |            |            |            |            |            |            |
|------------|------------|------------|------------|------------|------------|------------|------------|
| 50,569,000 | 50,570,000 | 50,571,000 | 50,572,000 | 50,573,000 | 50,574,000 | 50,575,000 | 50,576,000 |
| 50,577,000 | 50,578,000 | 50,579,000 | 50,580,000 | 50,581,000 | 50,582,000 | 50,583,000 | 50,584,000 |
| 50,585,000 | 50,586,000 | 50,587,000 | 50,588,000 | 50,589,000 | 50,590,000 | 50,591,000 | 50,592,000 |
| 50,593,000 | 50,594,000 | 50,595,000 | 50,596,000 | 50,597,000 | 50,598,000 | 50,599,000 | 50,600,000 |
| 50,601,000 | 50,602,000 | 50,603,000 | 50,604,000 | 50,605,000 | 50,606,000 | 50,607,000 | 50,608,000 |
| 50,609,000 | 50,610,000 | 50,611,000 | 50,612,000 | 50,613,000 | 50,614,000 | 50,615,000 | 50,616,000 |
| 50,617,000 | 50,618,000 | 50,619,000 | 50,620,000 | 50,621,000 | 50,622,000 | 50,623,000 | 50,624,000 |
| 50,625,000 | 50,626,000 | 50,627,000 | 50,628,000 | 50,629,000 | 50,630,000 | 50,631,000 | 50,632,000 |
| 50,633,000 | 50,634,000 | 50,635,000 | 50,636,000 | 50,637,000 | 50,638,000 | 50,639,000 | 50,640,000 |
| 50,641,000 | 50,642,000 | 50,643,000 | 50,644,000 | 50,645,000 | 50,646,000 | 50,647,000 | 50,648,000 |
| 50,649,000 | 50,650,000 | 50,651,000 | 50,652,000 | 50,653,000 | 50,654,000 | 50,655,000 | 50,656,000 |
| 50,657,000 | 50,658,000 | 50,659,000 | 50,660,000 | 50,661,000 | 50,662,000 | 50,663,000 | 50,664,000 |
| 50,665,000 | 50,666,000 | 50,667,000 | 50,668,000 | 50,669,000 | 50,670,000 | 50,671,000 | 50,672,000 |
| 50,673,000 | 50,674,000 | 50,675,000 | 50,676,000 | 50,677,000 | 50,678,000 | 50,679,000 | 50,680,000 |
| 50,681,000 | 50,682,000 | 50,683,000 | 50,684,000 | 50,685,000 | 50,686,000 | 50,687,000 | 50,688,000 |
| 50,689,000 | 50,690,000 | 50,691,000 | 50,692,000 | 50,693,000 | 50,694,000 | 50,695,000 | 50,696,000 |
| 50,697,000 | 50,698,000 | 50,699,000 | 50,700,000 | 50,701,000 | 50,702,000 | 50,703,000 | 50,704,000 |
| 50,705,000 | 50,706,000 | 50,707,000 | 50,708,000 | 50,709,000 | 50,710,000 | 50,711,000 | 50,712,000 |
| 50,713,000 | 50,714,000 | 50,715,000 | 50,716,000 | 50,717,000 | 50,718,000 | 50,719,000 | 50,720,000 |
| 50,721,000 | 50,722,000 | 50,723,000 | 50,724,000 | 50,725,000 | 50,726,000 | 50,727,000 | 50,728,000 |
| 50,729,000 | 50,730,000 | 50,731,000 | 50,732,000 | 50,733,000 | 50,734,000 | 50,735,000 | 50,736,000 |
| 50,737,000 | 50,738,000 | 50,739,000 | 50,740,000 | 50,741,000 | 50,742,000 | 50,743,000 | 50,744,000 |
| 50,745,000 | 50,746,000 | 50,747,000 | 50,748,000 | 50,749,000 | 50,750,000 | 50,751,000 | 50,752,000 |

Supplemental Figure S8

|            |            |            |            |            |            |            |            |
|------------|------------|------------|------------|------------|------------|------------|------------|
| 50,753,000 | 50,754,000 | 50,755,000 | 50,756,000 | 50,757,000 | 50,758,000 | 50,759,000 | 50,760,000 |
| 50,761,000 | 50,762,000 | 50,763,000 | 50,764,000 | 50,765,000 | 50,766,000 | 50,767,000 | 50,768,000 |
| 50,769,000 | 50,770,000 | 50,771,000 | 50,772,000 | 50,773,000 | 50,774,000 | 50,775,000 | 50,776,000 |
| 50,777,000 | 50,778,000 | 50,779,000 | 50,780,000 | 50,781,000 | 50,782,000 | 50,783,000 | 50,784,000 |
| 50,785,000 | 50,786,000 | 50,787,000 | 50,788,000 | 50,789,000 | 50,790,000 | 50,791,000 | 50,792,000 |
| 50,793,000 | 50,794,000 | 50,795,000 | 50,796,000 | 50,797,000 | 50,798,000 | 50,799,000 | 50,800,000 |
| 50,801,000 | 50,802,000 | 50,803,000 | 50,804,000 | 50,805,000 | 50,806,000 | 50,807,000 | 50,808,000 |
| 50,809,000 | 50,810,000 | 50,811,000 | 50,812,000 | 50,813,000 | 50,814,000 | 50,815,000 | 50,816,000 |
| 50,817,000 | 50,818,000 | 50,819,000 | 50,820,000 | 50,821,000 | 50,822,000 | 50,823,000 | 50,824,000 |
| 50,825,000 | 50,826,000 | 50,827,000 | 50,828,000 | 50,829,000 | 50,830,000 | 50,831,000 | 50,832,000 |
| 50,833,000 | 50,834,000 | 50,835,000 | 50,836,000 | 50,837,000 | 50,838,000 | 50,839,000 | 50,840,000 |
| 50,841,000 | 50,842,000 | 50,843,000 | 50,844,000 | 50,845,000 | 50,846,000 | 50,847,000 | 50,848,000 |
| 50,849,000 | 50,850,000 | 50,851,000 | 50,852,000 | 50,853,000 | 50,854,000 | 50,855,000 | 50,856,000 |
| 50,857,000 | 50,858,000 | 50,859,000 | 50,860,000 | 50,861,000 | 50,862,000 | 50,863,000 | 50,864,000 |
| 50,865,000 | 50,866,000 | 50,867,000 | 50,868,000 | 50,869,000 | 50,870,000 | 50,871,000 | 50,872,000 |
| 50,873,000 | 50,874,000 | 50,875,000 | 50,876,000 | 50,877,000 | 50,878,000 | 50,879,000 | 50,880,000 |
| 50,881,000 | 50,882,000 | 50,883,000 | 50,884,000 | 50,885,000 | 50,886,000 | 50,887,000 | 50,888,000 |
| 50,889,000 | 50,890,000 | 50,891,000 | 50,892,000 | 50,893,000 | 50,894,000 | 50,895,000 | 50,896,000 |
| 50,897,000 | 50,898,000 | 50,899,000 | 50,900,000 | 50,901,000 | 50,902,000 | 50,903,000 | 50,904,000 |
| 50,905,000 | 50,906,000 | 50,907,000 | 50,908,000 | 50,909,000 | 50,910,000 | 50,911,000 | 50,912,000 |
| 50,913,000 | 50,914,000 | 50,915,000 | 50,916,000 | 50,917,000 | 50,918,000 | 50,919,000 | 50,920,000 |
| 50,921,000 | 50,922,000 | 50,923,000 | 50,924,000 | 50,925,000 | 50,926,000 | 50,927,000 | 50,928,000 |
| 50,929,000 | 50,930,000 | 50,931,000 | 50,932,000 | 50,933,000 | 50,934,000 | 50,935,000 | 50,936,000 |



Supplemental Figure S8

|            |            |            |            |            |            |            |            |
|------------|------------|------------|------------|------------|------------|------------|------------|
| 50,937,000 | 50,938,000 | 50,939,000 | 50,940,000 | 50,941,000 | 50,942,000 | 50,943,000 | 50,944,000 |
| 50,945,000 | 50,946,000 | 50,947,000 | 50,948,000 | 50,949,000 | 50,950,000 | 50,951,000 | 50,952,000 |
| 50,953,000 | 50,954,000 | 50,955,000 | 50,956,000 | 50,957,000 | 50,958,000 | 50,959,000 | 50,960,000 |
| 50,961,000 | 50,962,000 | 50,963,000 | 50,964,000 | 50,965,000 | 50,966,000 | 50,967,000 | 50,968,000 |
| 50,969,000 | 50,970,000 | 50,971,000 | 50,972,000 | 50,973,000 | 50,974,000 | 50,975,000 | 50,976,000 |
| 50,977,000 | 50,978,000 | 50,979,000 | 50,980,000 | 50,981,000 | 50,982,000 | 50,983,000 | 50,984,000 |
| 50,985,000 | 50,986,000 | 50,987,000 | 50,988,000 | 50,989,000 | 50,990,000 | 50,991,000 | 50,992,000 |
| 50,993,000 | 50,994,000 | 50,995,000 | 50,996,000 | 50,997,000 | 50,998,000 | 50,999,000 | 51,000,000 |
| 51,001,000 | 51,002,000 | 51,003,000 | 51,004,000 | 51,005,000 | 51,006,000 | 51,007,000 | 51,008,000 |
| 51,009,000 | 51,010,000 | 51,011,000 | 51,012,000 | 51,013,000 | 51,014,000 | 51,015,000 | 51,016,000 |
| 51,017,000 | 51,018,000 | 51,019,000 | 51,020,000 | 51,021,000 | 51,022,000 | 51,023,000 | 51,024,000 |
| 51,025,000 | 51,026,000 | 51,027,000 | 51,028,000 | 51,029,000 | 51,030,000 | 51,031,000 | 51,032,000 |
| 51,033,000 | 51,034,000 | 51,035,000 | 51,036,000 | 51,037,000 | 51,038,000 | 51,039,000 | 51,040,000 |
| 51,041,000 | 51,042,000 | 51,043,000 | 51,044,000 | 51,045,000 | 51,046,000 | 51,047,000 | 51,048,000 |
| 51,049,000 | 51,050,000 | 51,051,000 | 51,052,000 | 51,053,000 | 51,054,000 | 51,055,000 | 51,056,000 |
| 51,057,000 | 51,058,000 | 51,059,000 | 51,060,000 | 51,061,000 | 51,062,000 | 51,063,000 | 51,064,000 |
| 51,065,000 | 51,066,000 | 51,067,000 | 51,068,000 | 51,069,000 | 51,070,000 | 51,071,000 | 51,072,000 |
| 51,073,000 | 51,074,000 | 51,075,000 | 51,076,000 | 51,077,000 | 51,078,000 | 51,079,000 | 51,080,000 |
| 51,081,000 | 51,082,000 | 51,083,000 | 51,084,000 | 51,085,000 | 51,086,000 | 51,087,000 | 51,088,000 |
| 51,089,000 | 51,090,000 | 51,091,000 | 51,092,000 | 51,093,000 | 51,094,000 | 51,095,000 | 51,096,000 |
| 51,097,000 | 51,098,000 | 51,099,000 | 51,100,000 | 51,101,000 | 51,102,000 | 51,103,000 | 51,104,000 |
| 51,105,000 | 51,106,000 | 51,107,000 | 51,108,000 | 51,109,000 | 51,110,000 | 51,111,000 | 51,112,000 |
| 51,113,000 | 51,114,000 | 51,115,000 | 51,116,000 | 51,117,000 | 51,118,000 | 51,119,000 | 51,120,000 |

Supplemental Figure S8

|            |            |            |            |            |            |            |            |
|------------|------------|------------|------------|------------|------------|------------|------------|
| 51,121,000 | 51,122,000 | 51,123,000 | 51,124,000 | 51,125,000 | 51,126,000 | 51,127,000 | 51,128,000 |
| 51,129,000 | 51,130,000 | 51,131,000 | 51,132,000 | 51,133,000 | 51,134,000 | 51,135,000 | 51,136,000 |
| 51,137,000 | 51,138,000 | 51,139,000 | 51,140,000 | 51,141,000 | 51,142,000 | 51,143,000 | 51,144,000 |
| 51,145,000 | 51,146,000 | 51,147,000 | 51,148,000 | 51,149,000 | 51,150,000 | 51,151,000 | 51,152,000 |
| 51,153,000 | 51,154,000 | 51,155,000 | 51,156,000 | 51,157,000 | 51,158,000 | 51,159,000 | 51,160,000 |
| 51,161,000 | 51,162,000 | 51,163,000 | 51,164,000 | 51,165,000 | 51,166,000 | 51,167,000 | 51,168,000 |
| 51,169,000 | 51,170,000 | 51,171,000 | 51,172,000 | 51,173,000 | 51,174,000 | 51,175,000 | 51,176,000 |
| 51,177,000 | 51,178,000 | 51,179,000 | 51,180,000 | 51,181,000 | 51,182,000 | 51,183,000 | 51,184,000 |
| 51,185,000 | 51,186,000 | 51,187,000 | 51,188,000 | 51,189,000 | 51,190,000 | 51,191,000 | 51,192,000 |
| 51,193,000 | 51,194,000 | 51,195,000 | 51,196,000 | 51,197,000 | 51,198,000 | 51,199,000 | 51,200,000 |
| 51,201,000 | 51,202,000 | 51,203,000 | 51,204,000 | 51,205,000 | 51,206,000 | 51,207,000 | 51,208,000 |
| 51,209,000 | 51,210,000 | 51,211,000 | 51,212,000 | 51,213,000 | 51,214,000 | 51,215,000 | 51,216,000 |
| 51,217,000 | 51,218,000 | 51,219,000 | 51,220,000 | 51,221,000 | 51,222,000 | 51,223,000 | 51,224,000 |
| 51,225,000 | 51,226,000 | 51,227,000 | 51,228,000 | 51,229,000 | 51,230,000 | 51,231,000 | 51,232,000 |
| 51,233,000 | 51,234,000 | 51,235,000 | 51,236,000 | 51,237,000 | 51,238,000 | 51,239,000 | 51,240,000 |
| 51,241,000 | 51,242,000 | 51,243,000 | 51,244,000 | 51,245,000 | 51,246,000 | 51,247,000 | 51,248,000 |
| 51,249,000 | 51,250,000 | 51,251,000 | 51,252,000 | 51,253,000 | 51,254,000 | 51,255,000 | 51,256,000 |
| 51,257,000 | 51,258,000 | 51,259,000 | 51,260,000 | 51,261,000 | 51,262,000 | 51,263,000 | 51,264,000 |
| 51,265,000 | 51,266,000 | 51,267,000 | 51,268,000 | 51,269,000 | 51,270,000 | 51,271,000 | 51,272,000 |
| 51,273,000 | 51,274,000 | 51,275,000 | 51,276,000 | 51,277,000 | 51,278,000 | 51,279,000 | 51,280,000 |
| 51,281,000 | 51,282,000 | 51,283,000 | 51,284,000 | 51,285,000 | 51,286,000 | 51,287,000 | 51,288,000 |
| 51,289,000 | 51,290,000 | 51,291,000 | 51,292,000 | 51,293,000 | 51,294,000 | 51,295,000 | 51,296,000 |

NE

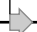

NE

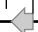

Supplemental Figure S8

|            |            |            |            |            |            |            |            |
|------------|------------|------------|------------|------------|------------|------------|------------|
| 51,297,000 | 51,298,000 | 51,299,000 | 51,300,000 | 51,301,000 | 51,302,000 | 51,303,000 | 51,304,000 |
| 51,305,000 | 51,306,000 | 51,307,000 | 51,308,000 | 51,309,000 | 51,310,000 | 51,311,000 | 51,312,000 |
| 51,313,000 | 51,314,000 | 51,315,000 | 51,316,000 | 51,317,000 | 51,318,000 | 51,319,000 | 51,320,000 |
| 51,321,000 | 51,322,000 | 51,323,000 | 51,324,000 | 51,325,000 | 51,326,000 | 51,327,000 | 51,328,000 |
| 51,329,000 | 51,330,000 | 51,331,000 | 51,332,000 | 51,333,000 | 51,334,000 | 51,335,000 | 51,336,000 |
| 51,337,000 | 51,338,000 | 51,339,000 | 51,340,000 | 51,341,000 | 51,342,000 | 51,343,000 | 51,344,000 |
| 51,345,000 | 51,346,000 | 51,347,000 | 51,348,000 | 51,349,000 | 51,350,000 | 51,351,000 | 51,352,000 |
| 51,353,000 | 51,354,000 | 51,355,000 | 51,356,000 | 51,357,000 | 51,358,000 | 51,359,000 | 51,360,000 |
| 51,361,000 | 51,362,000 | 51,363,000 | 51,364,000 | 51,365,000 | 51,366,000 | 51,367,000 | 51,368,000 |
| 51,369,000 | 51,370,000 | 51,371,000 | 51,372,000 | 51,373,000 | 51,374,000 | 51,375,000 | 51,376,000 |
| 51,377,000 | 51,378,000 | 51,379,000 | 51,380,000 | 51,381,000 | 51,382,000 | 51,383,000 | 51,384,000 |
| 51,385,000 | 51,386,000 | 51,387,000 | 51,388,000 | 51,389,000 | 51,390,000 | 51,391,000 | 51,392,000 |
| 51,393,000 | 51,394,000 | 51,395,000 | 51,396,000 | 51,397,000 | 51,398,000 | 51,399,000 | 51,400,000 |
| 51,401,000 | 51,402,000 | 51,403,000 | 51,404,000 | 51,405,000 | 51,406,000 | 51,407,000 | 51,408,000 |
| 51,409,000 | 51,410,000 | 51,411,000 | 51,412,000 | 51,413,000 | 51,414,000 | 51,415,000 | 51,416,000 |
| 51,417,000 | 51,418,000 | 51,419,000 | 51,420,000 | 51,421,000 | 51,422,000 | 51,423,000 | 51,424,000 |
| 51,425,000 | 51,426,000 | 51,427,000 | 51,428,000 | 51,429,000 | 51,430,000 | 51,431,000 | 51,432,000 |
| 51,433,000 | 51,434,000 | 51,435,000 | 51,436,000 | 51,437,000 | 51,438,000 | 51,439,000 | 51,440,000 |
| 51,441,000 | 51,442,000 | 51,443,000 | 51,444,000 | 51,445,000 | 51,446,000 | 51,447,000 | 51,448,000 |
| 51,449,000 | 51,450,000 | 51,451,000 | 51,452,000 | 51,453,000 | 51,454,000 | 51,455,000 | 51,456,000 |
| 51,457,000 | 51,458,000 | 51,459,000 | 51,460,000 | 51,461,000 | 51,462,000 | 51,463,000 | 51,464,000 |
| 51,465,000 | 51,466,000 | 51,467,000 | 51,468,000 | 51,469,000 | 51,470,000 | 51,471,000 | 51,472,000 |

NE

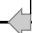



Supplemental Figure S8

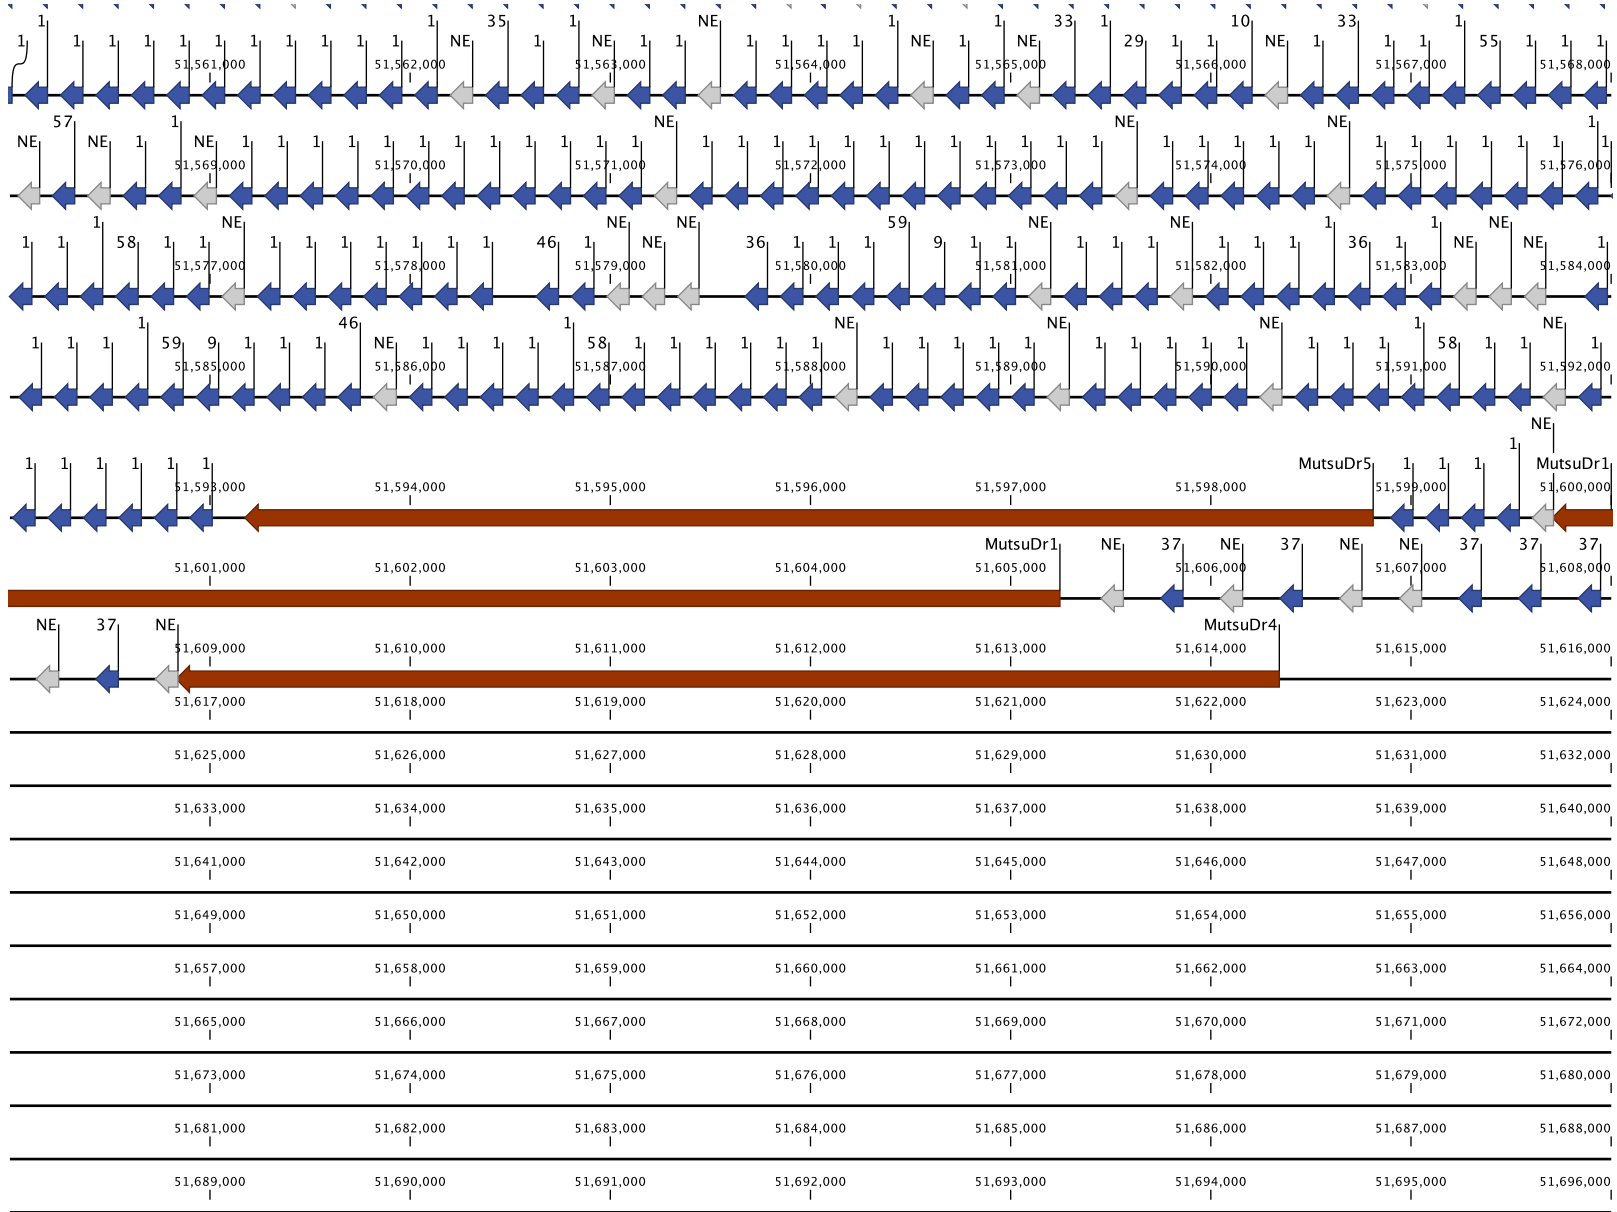

Supplemental Figure S8

|            |            |            |            |            |            |            |            |
|------------|------------|------------|------------|------------|------------|------------|------------|
| 51,697,000 | 51,698,000 | 51,699,000 | 51,700,000 | 51,701,000 | 51,702,000 | 51,703,000 | 51,704,000 |
| 51,705,000 | 51,706,000 | 51,707,000 | 51,708,000 | 51,709,000 | 51,710,000 | 51,711,000 | 51,712,000 |
| 51,713,000 | 51,714,000 | 51,715,000 | 51,716,000 | 51,717,000 | 51,718,000 | 51,719,000 | 51,720,000 |
| 51,721,000 | 51,722,000 | 51,723,000 | 51,724,000 | 51,725,000 | 51,726,000 | 51,727,000 | 51,728,000 |
| 51,729,000 | 51,730,000 | 51,731,000 | 51,732,000 | 51,733,000 | 51,734,000 | 51,735,000 | 51,736,000 |
| 51,737,000 | 51,738,000 | 51,739,000 | 51,740,000 | 51,741,000 | 51,742,000 | 51,743,000 | 51,744,000 |
| 51,745,000 | 51,746,000 | 51,747,000 | 51,748,000 | 51,749,000 | 51,750,000 | 51,751,000 | 51,752,000 |
| 51,753,000 | 51,754,000 | 51,755,000 | 51,756,000 | 51,757,000 | 51,758,000 | 51,759,000 | 51,760,000 |
| 51,761,000 | 51,762,000 | 51,763,000 | 51,764,000 | 51,765,000 | 51,766,000 | 51,767,000 | 51,768,000 |
| 51,769,000 | 51,770,000 | 51,771,000 | 51,772,000 | 51,773,000 | 51,774,000 | 51,775,000 | 51,776,000 |
| 51,777,000 | 51,778,000 | 51,779,000 | 51,780,000 | 51,781,000 | 51,782,000 | 51,783,000 | 51,784,000 |
| 51,785,000 | 51,786,000 | 51,787,000 | 51,788,000 | 51,789,000 | 51,790,000 | 51,791,000 | 51,792,000 |
| 51,793,000 | 51,794,000 | 51,795,000 | 51,796,000 | 51,797,000 | 51,798,000 | 51,799,000 | 51,800,000 |
| 51,801,000 | 51,802,000 | 51,803,000 | 51,804,000 | 51,805,000 | 51,806,000 | 51,807,000 | 51,808,000 |
| 51,809,000 | 51,810,000 | 51,811,000 | 51,812,000 | 51,813,000 | 51,814,000 | 51,815,000 | 51,816,000 |
| 51,817,000 | 51,818,000 | 51,819,000 | 51,820,000 | 51,821,000 | 51,822,000 | 51,823,000 | 51,824,000 |
| 51,825,000 | 51,826,000 | 51,827,000 | 51,828,000 | 51,829,000 | 51,830,000 | 51,831,000 | 51,832,000 |
| 51,833,000 | 51,834,000 | 51,835,000 | 51,836,000 | 51,837,000 | 51,838,000 | 51,839,000 | 51,840,000 |
| 51,841,000 | 51,842,000 | 51,843,000 | 51,844,000 | 51,845,000 | 51,846,000 | 51,847,000 | 51,848,000 |
| 51,849,000 | 51,850,000 | 51,851,000 | 51,852,000 | 51,853,000 | 51,854,000 | 51,855,000 | 51,856,000 |
| 51,857,000 | 51,858,000 | 51,859,000 | 51,860,000 | 51,861,000 | 51,862,000 | 51,863,000 | 51,864,000 |
| 51,865,000 | 51,866,000 | 51,867,000 | 51,868,000 | 51,869,000 | 51,870,000 | 51,871,000 | 51,872,000 |
| 51,873,000 | 51,874,000 | 51,875,000 | 51,876,000 | 51,877,000 | 51,878,000 | 51,879,000 | 51,880,000 |

Supplemental Figure S8

|            |            |            |            |            |            |            |            |
|------------|------------|------------|------------|------------|------------|------------|------------|
| 51,881,000 | 51,882,000 | 51,883,000 | 51,884,000 | 51,885,000 | 51,886,000 | 51,887,000 | 51,888,000 |
| 51,889,000 | 51,890,000 | 51,891,000 | 51,892,000 | 51,893,000 | 51,894,000 | 51,895,000 | 51,896,000 |
| 51,897,000 | 51,898,000 | 51,899,000 | 51,900,000 | 51,901,000 | 51,902,000 | 51,903,000 | 51,904,000 |
| 51,905,000 | 51,906,000 | 51,907,000 | 51,908,000 | 51,909,000 | 51,910,000 | 51,911,000 | 51,912,000 |
| 51,913,000 | 51,914,000 | 51,915,000 | 51,916,000 | 51,917,000 | 51,918,000 | 51,919,000 | 51,920,000 |
| 51,921,000 | 51,922,000 | 51,923,000 | 51,924,000 | 51,925,000 | 51,926,000 | 51,927,000 | 51,928,000 |
| 51,929,000 | 51,930,000 | 51,931,000 | 51,932,000 | 51,933,000 | 51,934,000 | 51,935,000 | 51,936,000 |
| 51,937,000 | 51,938,000 | 51,939,000 | 51,940,000 | 51,941,000 | 51,942,000 | 51,943,000 | 51,944,000 |
| 51,945,000 | 51,946,000 | 51,947,000 | 51,948,000 | 51,949,000 | 51,950,000 | 51,951,000 | 51,952,000 |
| 51,953,000 | 51,954,000 | 51,955,000 | 51,956,000 | 51,957,000 | 51,958,000 | 51,959,000 | 51,960,000 |
| 51,961,000 | 51,962,000 | 51,963,000 | 51,964,000 | 51,965,000 | 51,966,000 | 51,967,000 | 51,968,000 |
| 51,969,000 | 51,970,000 | 51,971,000 | 51,972,000 | 51,973,000 | 51,974,000 | 51,975,000 | 51,976,000 |
| 51,977,000 | 51,978,000 | 51,979,000 | 51,980,000 | 51,981,000 | 51,982,000 | 51,983,000 | 51,984,000 |
| 51,985,000 | 51,986,000 | 51,987,000 | 51,988,000 | 51,989,000 | 51,990,000 | 51,991,000 | 51,992,000 |
| 51,993,000 | 51,994,000 | 51,995,000 | 51,996,000 | 51,997,000 | 51,998,000 | 51,999,000 | 52,000,000 |
| 52,001,000 | 52,002,000 | 52,003,000 | 52,004,000 | 52,005,000 | 52,006,000 | 52,007,000 | 52,008,000 |
| 52,009,000 | 52,010,000 | 52,011,000 | 52,012,000 | 52,013,000 | 52,014,000 | 52,015,000 | 52,016,000 |
| 52,017,000 | 52,018,000 | 52,019,000 | 52,020,000 | 52,021,000 | 52,022,000 | 52,023,000 | 52,024,000 |
| 52,025,000 | 52,026,000 | 52,027,000 | 52,028,000 | 52,029,000 | 52,030,000 | 52,031,000 | 52,032,000 |
| 52,033,000 | 52,034,000 | 52,035,000 | 52,036,000 | 52,037,000 | 52,038,000 | 52,039,000 | 52,040,000 |
| 52,041,000 | 52,042,000 | 52,043,000 | 52,044,000 | 52,045,000 | 52,046,000 | 52,047,000 | 52,048,000 |
| 52,049,000 | 52,050,000 | 52,051,000 | 52,052,000 | 52,053,000 | 52,054,000 | 52,055,000 | 52,056,000 |
| 52,057,000 | 52,058,000 | 52,059,000 | 52,060,000 | 52,061,000 | 52,062,000 | 52,063,000 | 52,064,000 |

Supplemental Figure S8

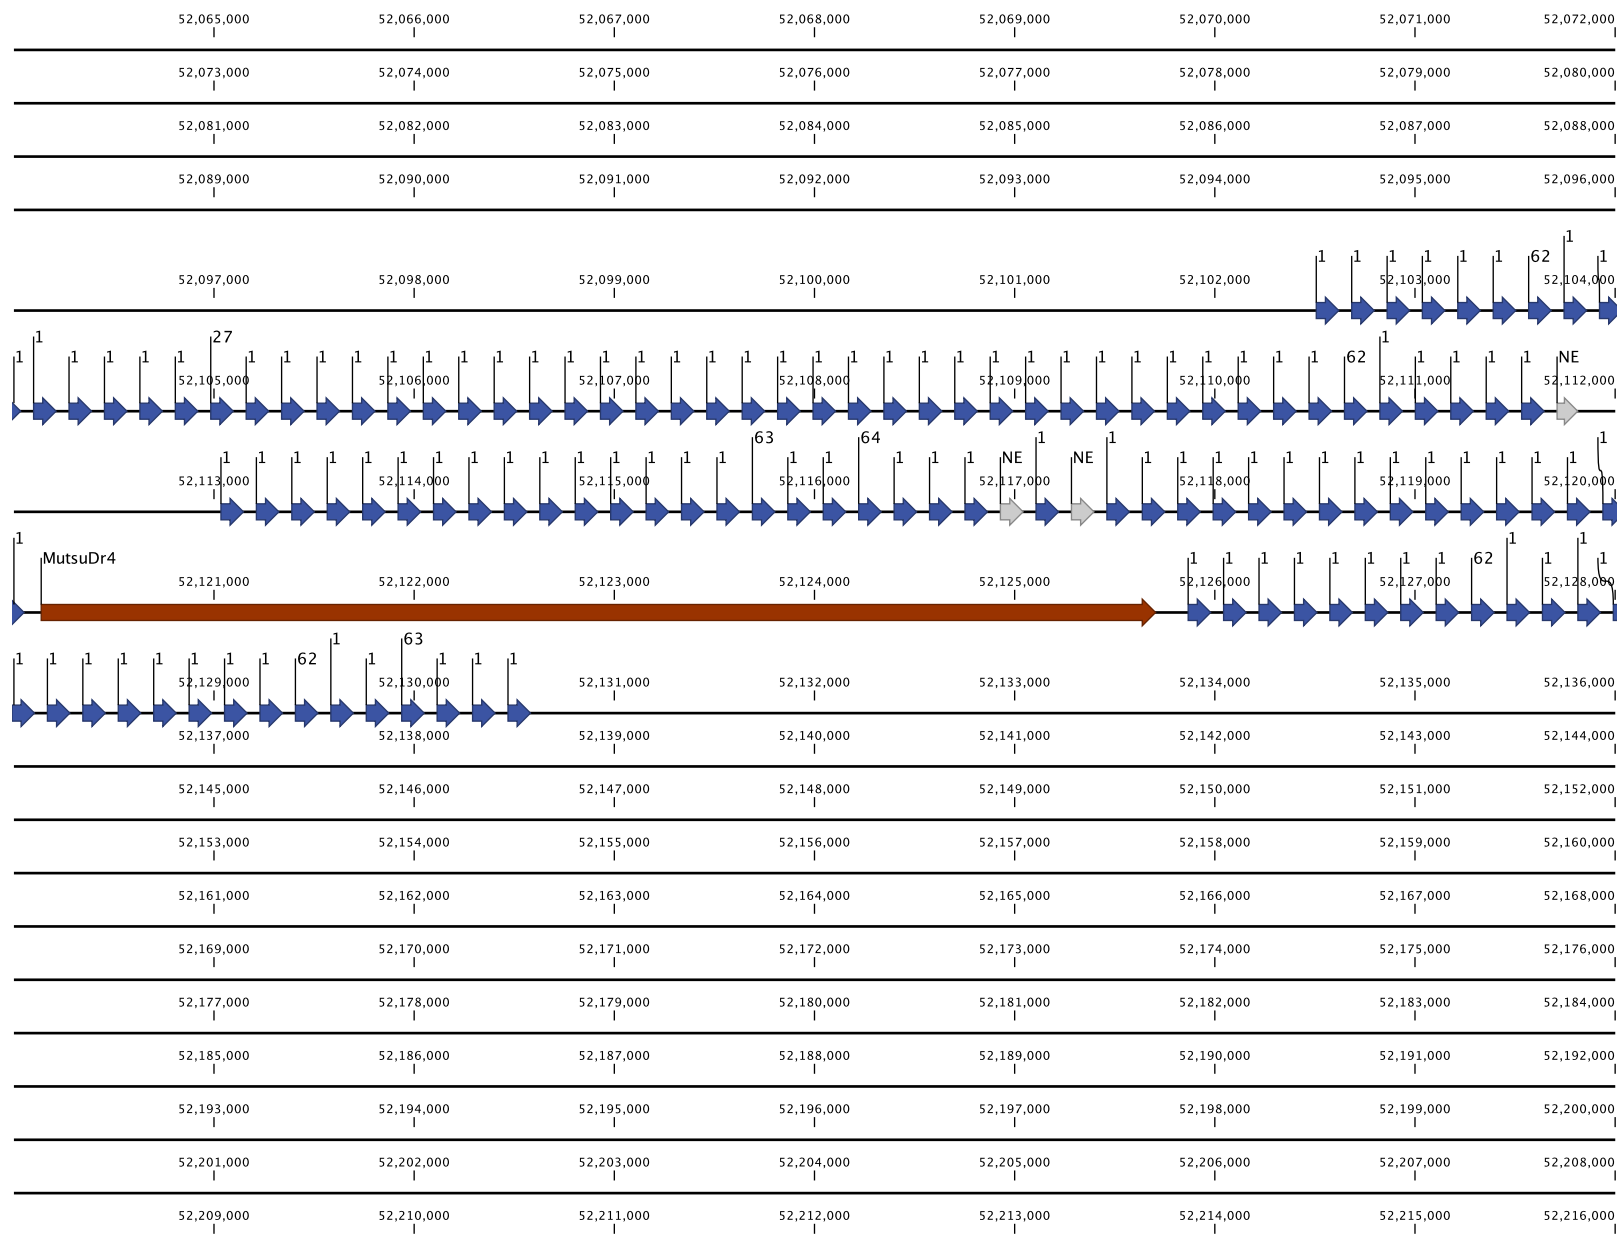



Supplemental Figure S8

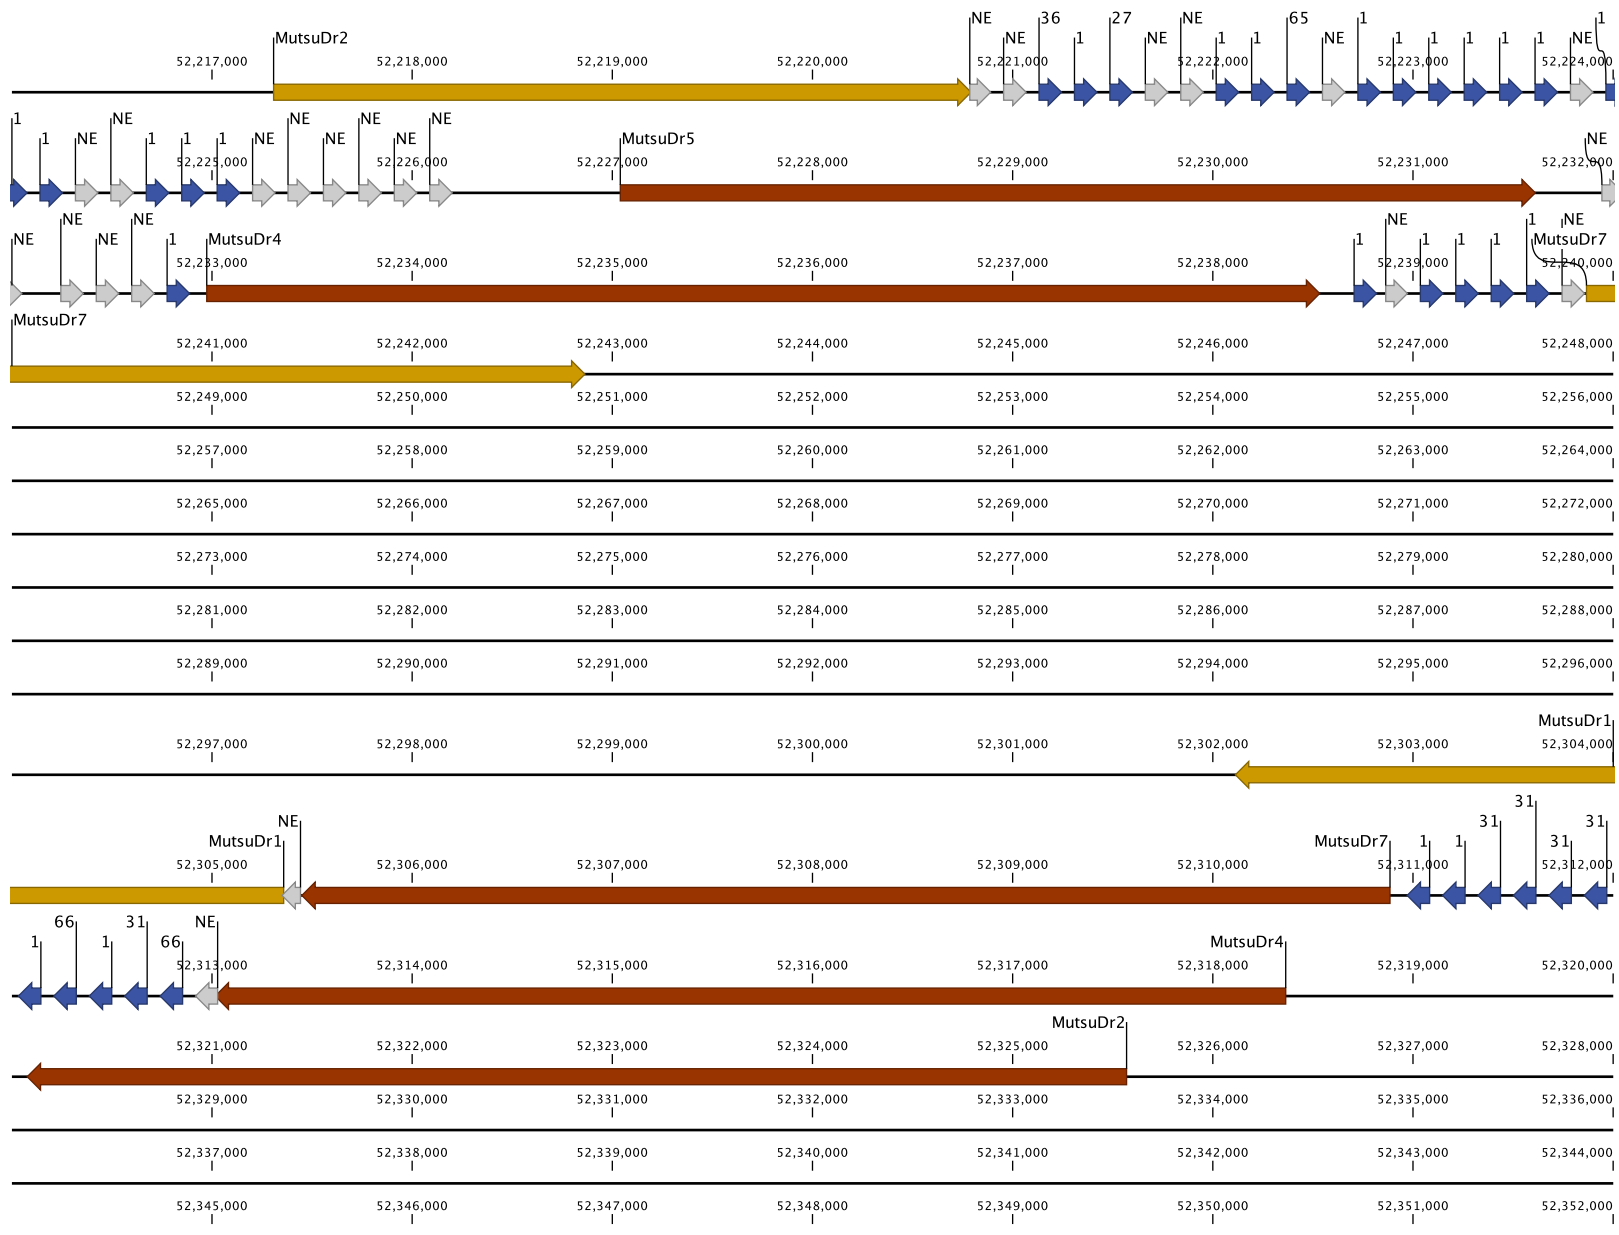

Supplemental Figure S8

|            |            |            |            |            |            |            |            |
|------------|------------|------------|------------|------------|------------|------------|------------|
| 52,353,000 | 52,354,000 | 52,355,000 | 52,356,000 | 52,357,000 | 52,358,000 | 52,359,000 | 52,360,000 |
| 52,361,000 | 52,362,000 | 52,363,000 | 52,364,000 | 52,365,000 | 52,366,000 | 52,367,000 | 52,368,000 |
| 52,369,000 | 52,370,000 | 52,371,000 | 52,372,000 | 52,373,000 | 52,374,000 | 52,375,000 | 52,376,000 |
| 52,377,000 | 52,378,000 | 52,379,000 | 52,380,000 | 52,381,000 | 52,382,000 | 52,383,000 | 52,384,000 |
| 52,385,000 | 52,386,000 | 52,387,000 | 52,388,000 | 52,389,000 | 52,390,000 | 52,391,000 | 52,392,000 |
| 52,393,000 | 52,394,000 | 52,395,000 | 52,396,000 | 52,397,000 | 52,398,000 | 52,399,000 | 52,400,000 |
| 52,401,000 | 52,402,000 | 52,403,000 | 52,404,000 | 52,405,000 | 52,406,000 | 52,407,000 | 52,408,000 |
| 52,409,000 | 52,410,000 | 52,411,000 | 52,412,000 | 52,413,000 | 52,414,000 | 52,415,000 | 52,416,000 |
| 52,417,000 | 52,418,000 | 52,419,000 | 52,420,000 | 52,421,000 | 52,422,000 | 52,423,000 | 52,424,000 |
| 52,425,000 | 52,426,000 | 52,427,000 | 52,428,000 | 52,429,000 | 52,430,000 | 52,431,000 | 52,432,000 |
| 52,433,000 | 52,434,000 | 52,435,000 | 52,436,000 | 52,437,000 | 52,438,000 | 52,439,000 | 52,440,000 |
| 52,441,000 | 52,442,000 | 52,443,000 | 52,444,000 | 52,445,000 | 52,446,000 | 52,447,000 | 52,448,000 |
| 52,449,000 | 52,450,000 | 52,451,000 | 52,452,000 | 52,453,000 | 52,454,000 | 52,455,000 | 52,456,000 |
| 52,457,000 | 52,458,000 | 52,459,000 | 52,460,000 | 52,461,000 | 52,462,000 | 52,463,000 | 52,464,000 |
| 52,465,000 | 52,466,000 | 52,467,000 | 52,468,000 | 52,469,000 | 52,470,000 | 52,471,000 | 52,472,000 |
| 52,473,000 | 52,474,000 | 52,475,000 | 52,476,000 | 52,477,000 | 52,478,000 | 52,479,000 | 52,480,000 |
| 52,481,000 | 52,482,000 | 52,483,000 | 52,484,000 | 52,485,000 | 52,486,000 | 52,487,000 | 52,488,000 |
| 52,489,000 | 52,490,000 | 52,491,000 | 52,492,000 | 52,493,000 | 52,494,000 | 52,495,000 | 52,496,000 |
| 52,497,000 | 52,498,000 | 52,499,000 | 52,500,000 | 52,501,000 | 52,502,000 | 52,503,000 | 52,504,000 |
| 52,505,000 | 52,506,000 | 52,507,000 | 52,508,000 | 52,509,000 | 52,510,000 | 52,511,000 | 52,512,000 |
| 52,513,000 | 52,514,000 | 52,515,000 | 52,516,000 | 52,517,000 | 52,518,000 | 52,519,000 | 52,520,000 |
| 52,521,000 | 52,522,000 | 52,523,000 | 52,524,000 | 52,525,000 | 52,526,000 | 52,527,000 | 52,528,000 |
| 52,529,000 | 52,530,000 | 52,531,000 | 52,532,000 | 52,533,000 | 52,534,000 | 52,535,000 | 52,536,000 |

NE

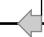

Supplemental Figure S8

|            |            |            |            |            |            |            |            |
|------------|------------|------------|------------|------------|------------|------------|------------|
| 52,537,000 | 52,538,000 | 52,539,000 | 52,540,000 | 52,541,000 | 52,542,000 | 52,543,000 | 52,544,000 |
| 52,545,000 | 52,546,000 | 52,547,000 | 52,548,000 | 52,549,000 | 52,550,000 | 52,551,000 | 52,552,000 |
| 52,553,000 | 52,554,000 | 52,555,000 | 52,556,000 | 52,557,000 | 52,558,000 | 52,559,000 | 52,560,000 |
| 52,561,000 | 52,562,000 | 52,563,000 | 52,564,000 | 52,565,000 | 52,566,000 | 52,567,000 | 52,568,000 |
| 52,569,000 | 52,570,000 | 52,571,000 | 52,572,000 | 52,573,000 | 52,574,000 | 52,575,000 | 52,576,000 |
| 52,577,000 | 52,578,000 | 52,579,000 | 52,580,000 | 52,581,000 | 52,582,000 | 52,583,000 | 52,584,000 |
| 52,585,000 | 52,586,000 | 52,587,000 | 52,588,000 | 52,589,000 | 52,590,000 | 52,591,000 | 52,592,000 |
| 52,593,000 | 52,594,000 | 52,595,000 | 52,596,000 | 52,597,000 | 52,598,000 | 52,599,000 | 52,600,000 |
| 52,601,000 | 52,602,000 | 52,603,000 | 52,604,000 | 52,605,000 | 52,606,000 | 52,607,000 | 52,608,000 |
| 52,609,000 | 52,610,000 | 52,611,000 | 52,612,000 | 52,613,000 | 52,614,000 | 52,615,000 | 52,616,000 |
| 52,617,000 | 52,618,000 | 52,619,000 | 52,620,000 | 52,621,000 | 52,622,000 | 52,623,000 | 52,624,000 |
| 52,625,000 | 52,626,000 | 52,627,000 | 52,628,000 | 52,629,000 | 52,630,000 | 52,631,000 | 52,632,000 |
| 52,633,000 | 52,634,000 | 52,635,000 | 52,636,000 | 52,637,000 | 52,638,000 | 52,639,000 | 52,640,000 |
| 52,641,000 | 52,642,000 | 52,643,000 | 52,644,000 | 52,645,000 | 52,646,000 | 52,647,000 | 52,648,000 |
| 52,649,000 | 52,650,000 | 52,651,000 | 52,652,000 | 52,653,000 | 52,654,000 | 52,655,000 | 52,656,000 |
| 52,657,000 | 52,658,000 | 52,659,000 | 52,660,000 | 52,661,000 | 52,662,000 | 52,663,000 | 52,664,000 |
| 52,665,000 | 52,666,000 | 52,667,000 | 52,668,000 | 52,669,000 | 52,670,000 | 52,671,000 | 52,672,000 |
| 52,673,000 | 52,674,000 | 52,675,000 | 52,676,000 | 52,677,000 | 52,678,000 | 52,679,000 | 52,680,000 |
| 52,681,000 | 52,682,000 | 52,683,000 | 52,684,000 | 52,685,000 | 52,686,000 | 52,687,000 | 52,688,000 |
| 52,689,000 | 52,690,000 | 52,691,000 | 52,692,000 | 52,693,000 | 52,694,000 | 52,695,000 | 52,696,000 |
| 52,697,000 | 52,698,000 | 52,699,000 | 52,700,000 | 52,701,000 | 52,702,000 | 52,703,000 | 52,704,000 |
| 52,705,000 | 52,706,000 | 52,707,000 | 52,708,000 | 52,709,000 | 52,710,000 | 52,711,000 | 52,712,000 |
| 52,713,000 | 52,714,000 | 52,715,000 | 52,716,000 | 52,717,000 | 52,718,000 | 52,719,000 | 52,720,000 |

NE

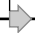

Supplemental Figure S8

|            |            |            |            |            |            |            |            |
|------------|------------|------------|------------|------------|------------|------------|------------|
| 52,721,000 | 52,722,000 | 52,723,000 | 52,724,000 | 52,725,000 | 52,726,000 | 52,727,000 | 52,728,000 |
| 52,729,000 | 52,730,000 | 52,731,000 | 52,732,000 | 52,733,000 | 52,734,000 | 52,735,000 | 52,736,000 |
| 52,737,000 | 52,738,000 | 52,739,000 | 52,740,000 | 52,741,000 | 52,742,000 | 52,743,000 | 52,744,000 |
| 52,745,000 | 52,746,000 | 52,747,000 | 52,748,000 | 52,749,000 | 52,750,000 | 52,751,000 | 52,752,000 |
| 52,753,000 | 52,754,000 | 52,755,000 | 52,756,000 | 52,757,000 | 52,758,000 | 52,759,000 | 52,760,000 |
| 52,761,000 | 52,762,000 | 52,763,000 | 52,764,000 | 52,765,000 | 52,766,000 | 52,767,000 | 52,768,000 |
| 52,769,000 | 52,770,000 | 52,771,000 | 52,772,000 | 52,773,000 | 52,774,000 | 52,775,000 | 52,776,000 |
| 52,777,000 | 52,778,000 | 52,779,000 | 52,780,000 | 52,781,000 | 52,782,000 | 52,783,000 | 52,784,000 |
| 52,785,000 | 52,786,000 | 52,787,000 | 52,788,000 | 52,789,000 | 52,790,000 | 52,791,000 | 52,792,000 |
| 52,793,000 | 52,794,000 | 52,795,000 | 52,796,000 | 52,797,000 | 52,798,000 | 52,799,000 | 52,800,000 |
| 52,801,000 | 52,802,000 | 52,803,000 | 52,804,000 | 52,805,000 | 52,806,000 | 52,807,000 | 52,808,000 |
| 52,809,000 | 52,810,000 | 52,811,000 | 52,812,000 | 52,813,000 | 52,814,000 | 52,815,000 | 52,816,000 |
| 52,817,000 | 52,818,000 | 52,819,000 | 52,820,000 | 52,821,000 | 52,822,000 | 52,823,000 | 52,824,000 |
| 52,825,000 | 52,826,000 | 52,827,000 | 52,828,000 | 52,829,000 | 52,830,000 | 52,831,000 | 52,832,000 |
| 52,833,000 | 52,834,000 | 52,835,000 | 52,836,000 | 52,837,000 | 52,838,000 | 52,839,000 | 52,840,000 |
| 52,841,000 | 52,842,000 | 52,843,000 | 52,844,000 | 52,845,000 | 52,846,000 | 52,847,000 | 52,848,000 |
| 52,849,000 | 52,850,000 | 52,851,000 | 52,852,000 | 52,853,000 | 52,854,000 | 52,855,000 | 52,856,000 |
| 52,857,000 | 52,858,000 | 52,859,000 | 52,860,000 | 52,861,000 | 52,862,000 | 52,863,000 | 52,864,000 |
| 52,865,000 | 52,866,000 | 52,867,000 | 52,868,000 | 52,869,000 | 52,870,000 | 52,871,000 | 52,872,000 |
| 52,873,000 | 52,874,000 | 52,875,000 | 52,876,000 | 52,877,000 | 52,878,000 | 52,879,000 | 52,880,000 |
| 52,881,000 | 52,882,000 | 52,883,000 | 52,884,000 | 52,885,000 | 52,886,000 | 52,887,000 | 52,888,000 |
| 52,889,000 | 52,890,000 | 52,891,000 | 52,892,000 | 52,893,000 | 52,894,000 | 52,895,000 | 52,896,000 |

Supplemental Figure S8

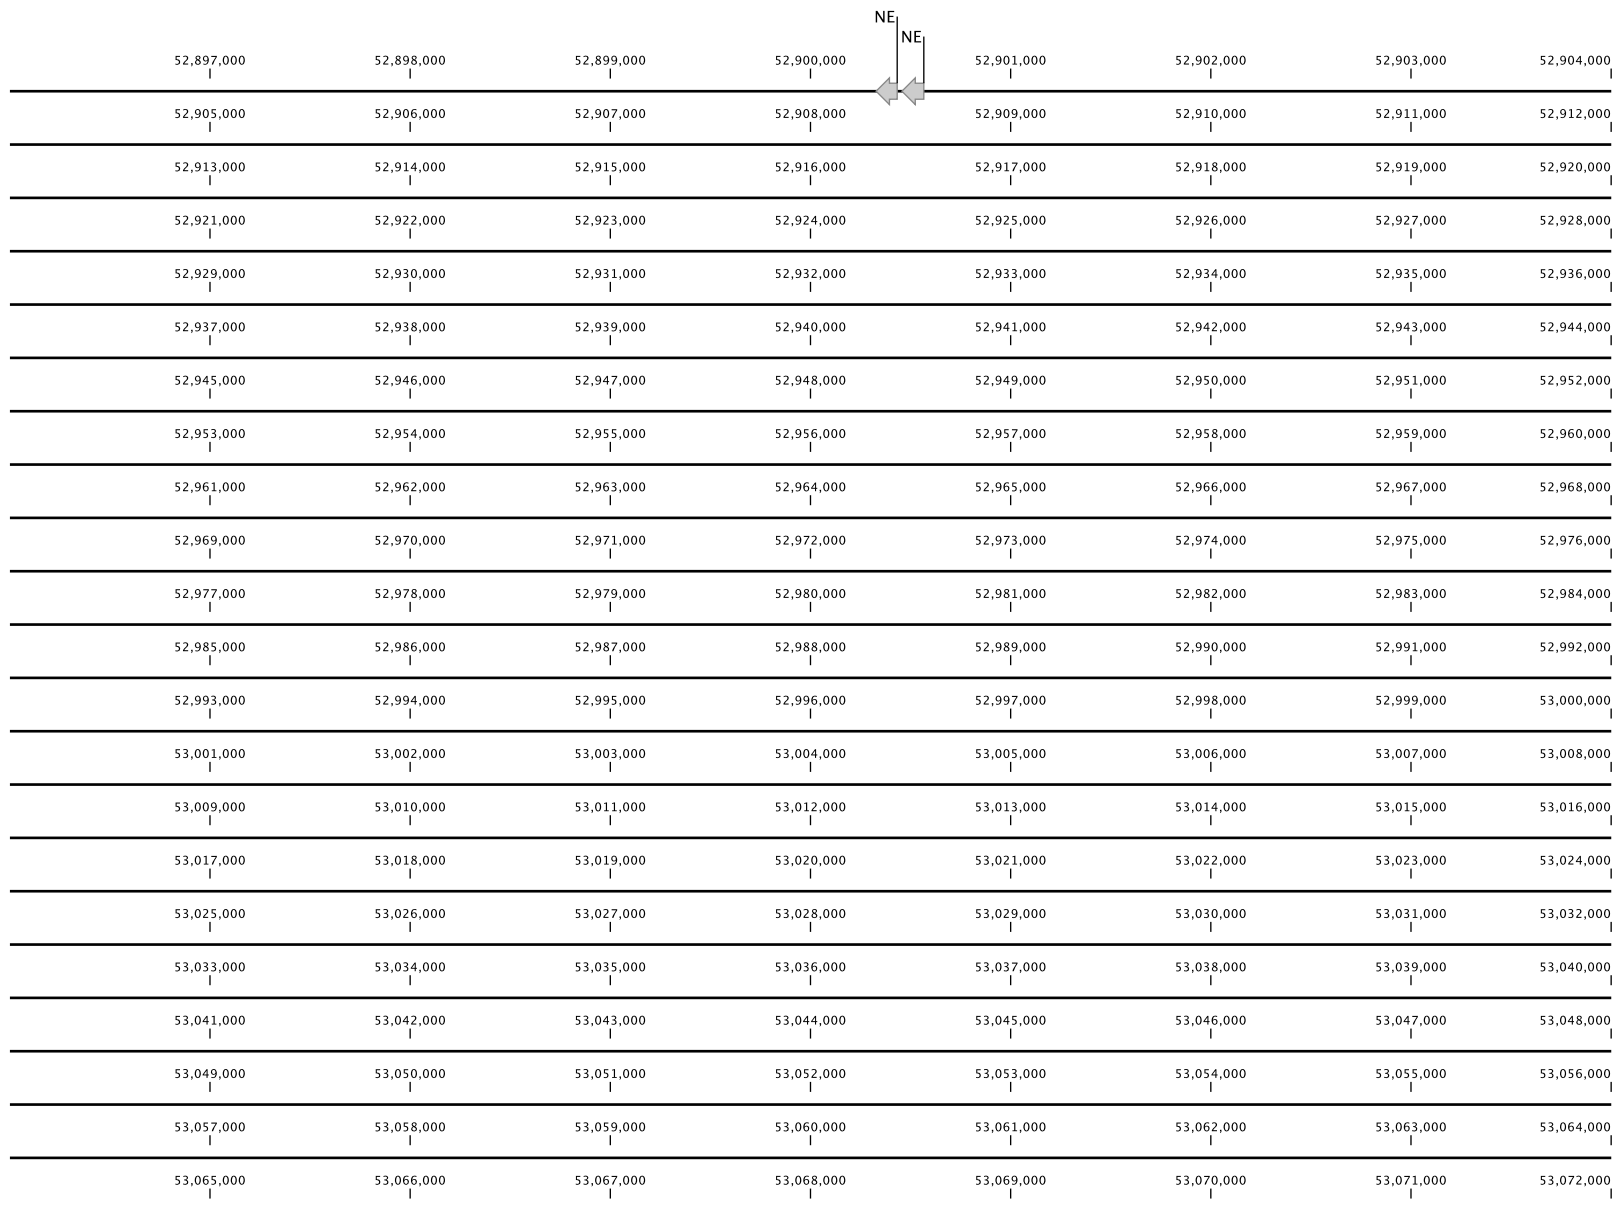

Supplemental Figure S8

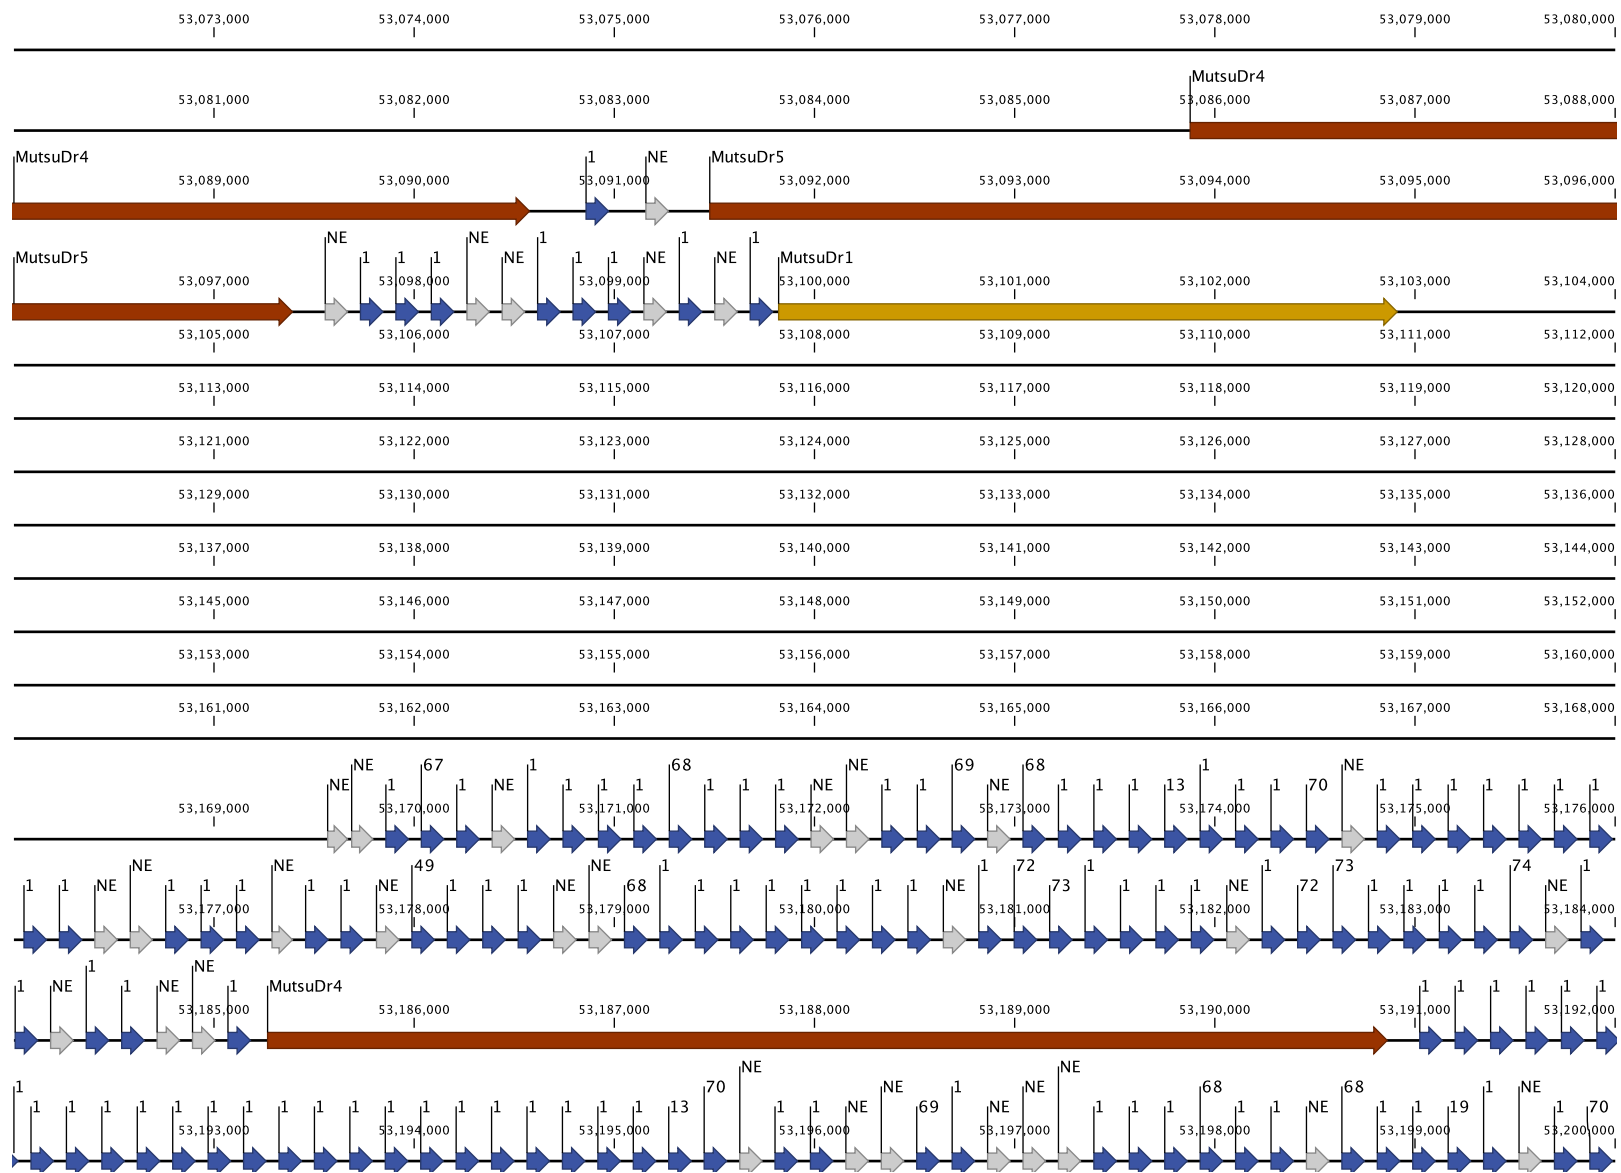

Supplemental Figure S8

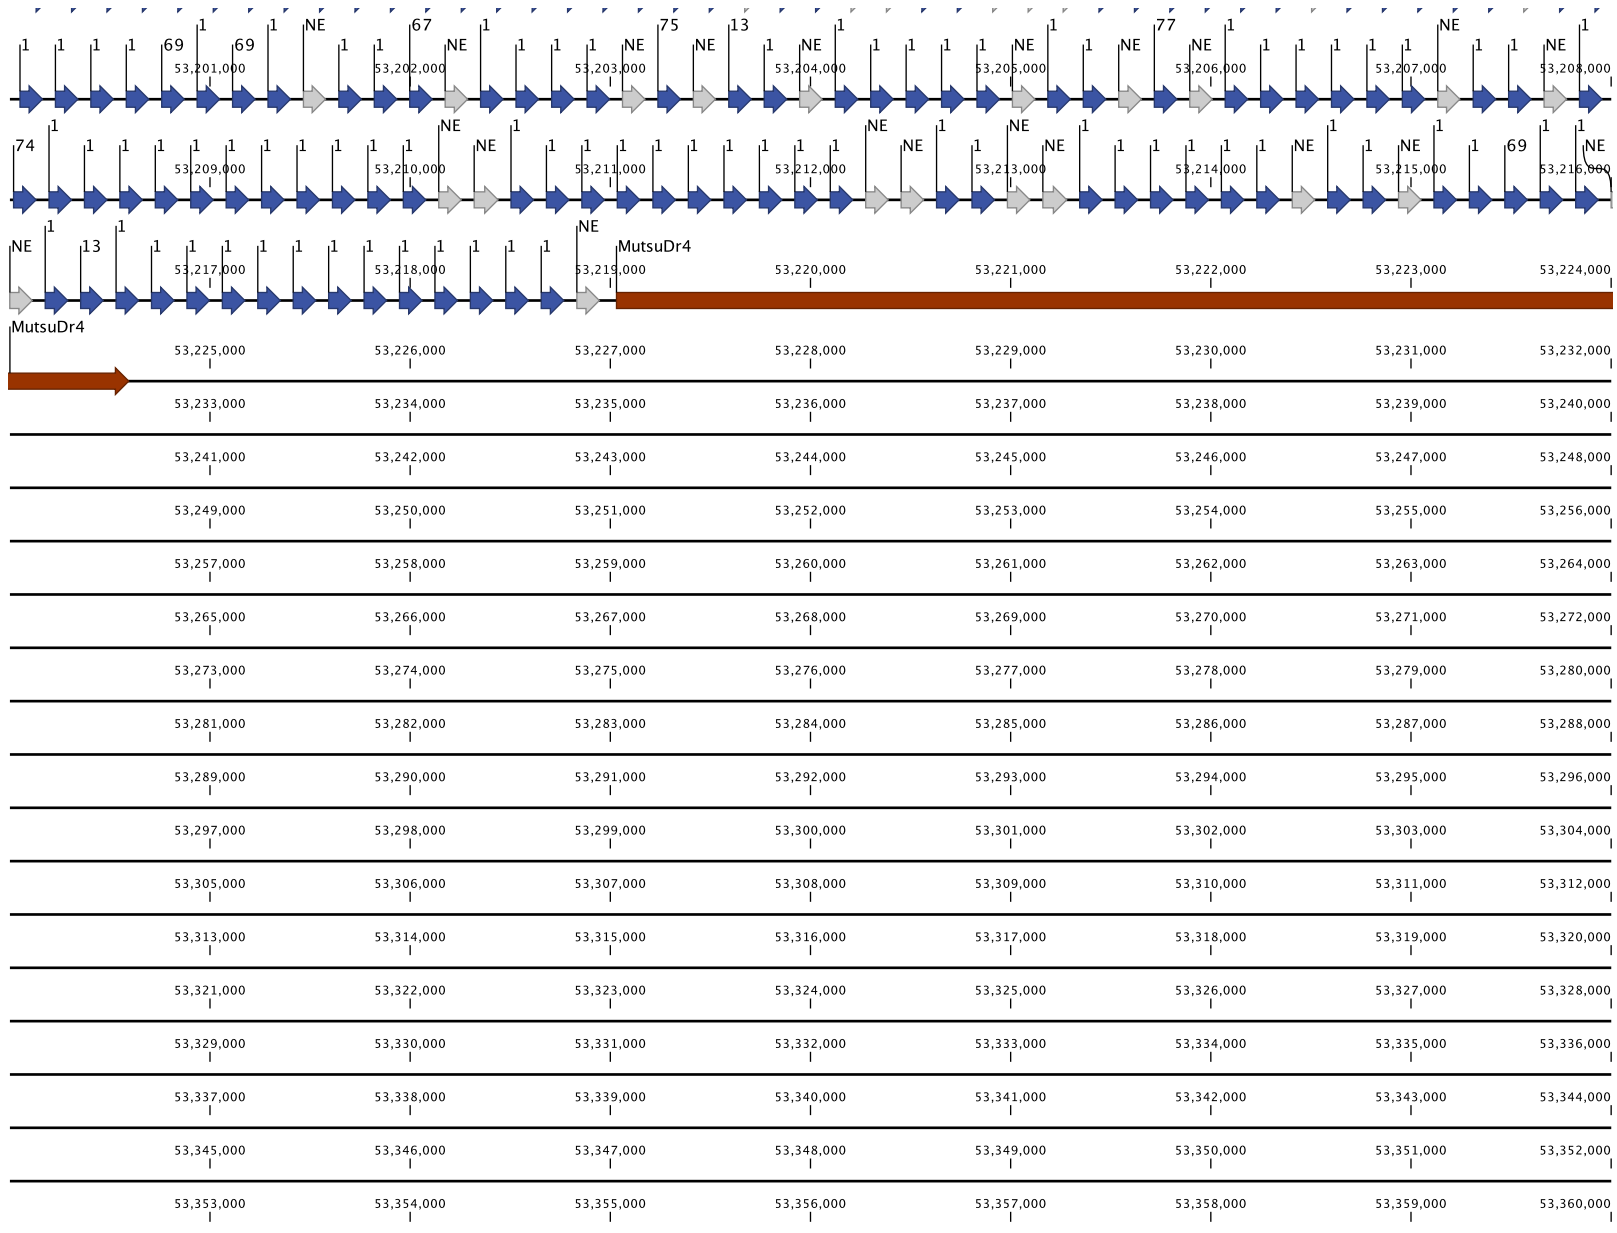

Supplemental Figure S8

|            |            |            |            |            |            |            |            |
|------------|------------|------------|------------|------------|------------|------------|------------|
| 53,361,000 | 53,362,000 | 53,363,000 | 53,364,000 | 53,365,000 | 53,366,000 | 53,367,000 | 53,368,000 |
| 53,369,000 | 53,370,000 | 53,371,000 | 53,372,000 | 53,373,000 | 53,374,000 | 53,375,000 | 53,376,000 |
| 53,377,000 | 53,378,000 | 53,379,000 | 53,380,000 | 53,381,000 | 53,382,000 | 53,383,000 | 53,384,000 |
| 53,385,000 | 53,386,000 | 53,387,000 | 53,388,000 | 53,389,000 | 53,390,000 | 53,391,000 | 53,392,000 |
| 53,393,000 | 53,394,000 | 53,395,000 | 53,396,000 | 53,397,000 | 53,398,000 | 53,399,000 | 53,400,000 |
| 53,401,000 | 53,402,000 | 53,403,000 | 53,404,000 | 53,405,000 | 53,406,000 | 53,407,000 | 53,408,000 |
| 53,409,000 | 53,410,000 | 53,411,000 | 53,412,000 | 53,413,000 | 53,414,000 | 53,415,000 | 53,416,000 |
| 53,417,000 | 53,418,000 | 53,419,000 | 53,420,000 | 53,421,000 | 53,422,000 | 53,423,000 | 53,424,000 |
| 53,425,000 | 53,426,000 | 53,427,000 | 53,428,000 | 53,429,000 | 53,430,000 | 53,431,000 | 53,432,000 |
| 53,433,000 | 53,434,000 | 53,435,000 | 53,436,000 | 53,437,000 | 53,438,000 | 53,439,000 | 53,440,000 |
| 53,441,000 | 53,442,000 | 53,443,000 | 53,444,000 | 53,445,000 | 53,446,000 | 53,447,000 | 53,448,000 |
| 53,449,000 | 53,450,000 | 53,451,000 | 53,452,000 | 53,453,000 | 53,454,000 | 53,455,000 | 53,456,000 |
| 53,457,000 | 53,458,000 | 53,459,000 | 53,460,000 | 53,461,000 | 53,462,000 | 53,463,000 | 53,464,000 |
| 53,465,000 | 53,466,000 | 53,467,000 | 53,468,000 | 53,469,000 | 53,470,000 | 53,471,000 | 53,472,000 |
| 53,473,000 | 53,474,000 | 53,475,000 | 53,476,000 | 53,477,000 | 53,478,000 | 53,479,000 | 53,480,000 |
| 53,481,000 | 53,482,000 | 53,483,000 | 53,484,000 | 53,485,000 | 53,486,000 | 53,487,000 | 53,488,000 |
| 53,489,000 | 53,490,000 | 53,491,000 | 53,492,000 | 53,493,000 | 53,494,000 | 53,495,000 | 53,496,000 |
| 53,497,000 | 53,498,000 | 53,499,000 | 53,500,000 | 53,501,000 | 53,502,000 | 53,503,000 | 53,504,000 |
| 53,505,000 | 53,506,000 | 53,507,000 | 53,508,000 | 53,509,000 | 53,510,000 | 53,511,000 | 53,512,000 |
| 53,513,000 | 53,514,000 | 53,515,000 | 53,516,000 | 53,517,000 | 53,518,000 | 53,519,000 | 53,520,000 |
| 53,521,000 | 53,522,000 | 53,523,000 | 53,524,000 | 53,525,000 | 53,526,000 | 53,527,000 | 53,528,000 |
| 53,529,000 | 53,530,000 | 53,531,000 | 53,532,000 | 53,533,000 | 53,534,000 | 53,535,000 | 53,536,000 |
| 53,537,000 | 53,538,000 | 53,539,000 | 53,540,000 | 53,541,000 | 53,542,000 | 53,543,000 | 53,544,000 |

NE



Supplemental Figure S8

|            |            |            |            |            |            |            |            |
|------------|------------|------------|------------|------------|------------|------------|------------|
| 53,545,000 | 53,546,000 | 53,547,000 | 53,548,000 | 53,549,000 | 53,550,000 | 53,551,000 | 53,552,000 |
| 53,553,000 | 53,554,000 | 53,555,000 | 53,556,000 | 53,557,000 | 53,558,000 | 53,559,000 | 53,560,000 |
| 53,561,000 | 53,562,000 | 53,563,000 | 53,564,000 | 53,565,000 | 53,566,000 | 53,567,000 | 53,568,000 |
| 53,569,000 | 53,570,000 | 53,571,000 | 53,572,000 | 53,573,000 | 53,574,000 | 53,575,000 | 53,576,000 |
| 53,577,000 | 53,578,000 | 53,579,000 | 53,580,000 | 53,581,000 | 53,582,000 | 53,583,000 | 53,584,000 |
| 53,585,000 | 53,586,000 | 53,587,000 | 53,588,000 | 53,589,000 | 53,590,000 | 53,591,000 | 53,592,000 |
| 53,593,000 | 53,594,000 | 53,595,000 | 53,596,000 | 53,597,000 | 53,598,000 | 53,599,000 | 53,600,000 |
| 53,601,000 | 53,602,000 | 53,603,000 | 53,604,000 | 53,605,000 | 53,606,000 | 53,607,000 | 53,608,000 |
| 53,609,000 | 53,610,000 | 53,611,000 | 53,612,000 | 53,613,000 | 53,614,000 | 53,615,000 | 53,616,000 |
| 53,617,000 | 53,618,000 | 53,619,000 | 53,620,000 | 53,621,000 | 53,622,000 | 53,623,000 | 53,624,000 |
| 53,625,000 | 53,626,000 | 53,627,000 | 53,628,000 | 53,629,000 | 53,630,000 | 53,631,000 | 53,632,000 |
| 53,633,000 | 53,634,000 | 53,635,000 | 53,636,000 | 53,637,000 | 53,638,000 | 53,639,000 | 53,640,000 |
| 53,641,000 | 53,642,000 | 53,643,000 | 53,644,000 | 53,645,000 | 53,646,000 | 53,647,000 | 53,648,000 |
| 53,649,000 | 53,650,000 | 53,651,000 | 53,652,000 | 53,653,000 | 53,654,000 | 53,655,000 | 53,656,000 |
| 53,657,000 | 53,658,000 | 53,659,000 | 53,660,000 | 53,661,000 | 53,662,000 | 53,663,000 | 53,664,000 |
| 53,665,000 | 53,666,000 | 53,667,000 | 53,668,000 | 53,669,000 | 53,670,000 | 53,671,000 | 53,672,000 |
| 53,673,000 | 53,674,000 | 53,675,000 | 53,676,000 | 53,677,000 | 53,678,000 | 53,679,000 | 53,680,000 |
| 53,681,000 | 53,682,000 | 53,683,000 | 53,684,000 | 53,685,000 | 53,686,000 | 53,687,000 | 53,688,000 |
| 53,689,000 | 53,690,000 | 53,691,000 | 53,692,000 | 53,693,000 | 53,694,000 | 53,695,000 | 53,696,000 |
| 53,697,000 | 53,698,000 | 53,699,000 | 53,700,000 | 53,701,000 | 53,702,000 | 53,703,000 | 53,704,000 |
| 53,705,000 | 53,706,000 | 53,707,000 | 53,708,000 | 53,709,000 | 53,710,000 | 53,711,000 | 53,712,000 |
| 53,713,000 | 53,714,000 | 53,715,000 | 53,716,000 | 53,717,000 | 53,718,000 | 53,719,000 | 53,720,000 |
| 53,721,000 | 53,722,000 | 53,723,000 | 53,724,000 | 53,725,000 | 53,726,000 | 53,727,000 | 53,728,000 |

Supplemental Figure S8

|            |            |            |            |            |            |            |            |
|------------|------------|------------|------------|------------|------------|------------|------------|
| 53,729,000 | 53,730,000 | 53,731,000 | 53,732,000 | 53,733,000 | 53,734,000 | 53,735,000 | 53,736,000 |
| 53,737,000 | 53,738,000 | 53,739,000 | 53,740,000 | 53,741,000 | 53,742,000 | 53,743,000 | 53,744,000 |
| 53,745,000 | 53,746,000 | 53,747,000 | 53,748,000 | 53,749,000 | 53,750,000 | 53,751,000 | 53,752,000 |
| 53,753,000 | 53,754,000 | 53,755,000 | 53,756,000 | 53,757,000 | 53,758,000 | 53,759,000 | 53,760,000 |
| 53,761,000 | 53,762,000 | 53,763,000 | 53,764,000 | 53,765,000 | 53,766,000 | 53,767,000 | 53,768,000 |
| 53,769,000 | 53,770,000 | 53,771,000 | 53,772,000 | 53,773,000 | 53,774,000 | 53,775,000 | 53,776,000 |
| 53,777,000 | 53,778,000 | 53,779,000 | 53,780,000 | 53,781,000 | 53,782,000 | 53,783,000 | 53,784,000 |
| 53,785,000 | 53,786,000 | 53,787,000 | 53,788,000 | 53,789,000 | 53,790,000 | 53,791,000 | 53,792,000 |
| 53,793,000 | 53,794,000 | 53,795,000 | 53,796,000 | 53,797,000 | 53,798,000 | 53,799,000 | 53,800,000 |
| 53,801,000 | 53,802,000 | 53,803,000 | 53,804,000 | 53,805,000 | 53,806,000 | 53,807,000 | 53,808,000 |
| 53,809,000 | 53,810,000 | 53,811,000 | 53,812,000 | 53,813,000 | 53,814,000 | 53,815,000 | 53,816,000 |
| 53,817,000 | 53,818,000 | 53,819,000 | 53,820,000 | 53,821,000 | 53,822,000 | 53,823,000 | 53,824,000 |
| 53,825,000 | 53,826,000 | 53,827,000 | 53,828,000 | 53,829,000 | 53,830,000 | 53,831,000 | 53,832,000 |
| 53,833,000 | 53,834,000 | 53,835,000 | 53,836,000 | 53,837,000 | 53,838,000 | 53,839,000 | 53,840,000 |
| 53,841,000 | 53,842,000 | 53,843,000 | 53,844,000 | 53,845,000 | 53,846,000 | 53,847,000 | 53,848,000 |
| 53,849,000 | 53,850,000 | 53,851,000 | 53,852,000 | 53,853,000 | 53,854,000 | 53,855,000 | 53,856,000 |
| 53,857,000 | 53,858,000 | 53,859,000 | 53,860,000 | 53,861,000 | 53,862,000 | 53,863,000 | 53,864,000 |
| 53,865,000 | 53,866,000 | 53,867,000 | 53,868,000 | 53,869,000 | 53,870,000 | 53,871,000 | 53,872,000 |
| 53,873,000 | 53,874,000 | 53,875,000 | 53,876,000 | 53,877,000 | 53,878,000 | 53,879,000 | 53,880,000 |
| 53,881,000 | 53,882,000 | 53,883,000 | 53,884,000 | 53,885,000 | 53,886,000 | 53,887,000 | 53,888,000 |
| 53,889,000 | 53,890,000 | 53,891,000 | 53,892,000 | 53,893,000 | 53,894,000 | 53,895,000 | 53,896,000 |
| 53,897,000 | 53,898,000 | 53,899,000 | 53,900,000 | 53,901,000 | 53,902,000 | 53,903,000 | 53,904,000 |
| 53,905,000 | 53,906,000 | 53,907,000 | 53,908,000 | 53,909,000 | 53,910,000 | 53,911,000 | 53,912,000 |

Supplemental Figure S8

|            |            |            |            |            |            |            |            |
|------------|------------|------------|------------|------------|------------|------------|------------|
| 53,913,000 | 53,914,000 | 53,915,000 | 53,916,000 | 53,917,000 | 53,918,000 | 53,919,000 | 53,920,000 |
| 53,921,000 | 53,922,000 | 53,923,000 | 53,924,000 | 53,925,000 | 53,926,000 | 53,927,000 | 53,928,000 |
| 53,929,000 | 53,930,000 | 53,931,000 | 53,932,000 | 53,933,000 | 53,934,000 | 53,935,000 | 53,936,000 |
| 53,937,000 | 53,938,000 | 53,939,000 | 53,940,000 | 53,941,000 | 53,942,000 | 53,943,000 | 53,944,000 |
| 53,945,000 | 53,946,000 | 53,947,000 | 53,948,000 | 53,949,000 | 53,950,000 | 53,951,000 | 53,952,000 |
| 53,953,000 | 53,954,000 | 53,955,000 | 53,956,000 | 53,957,000 | 53,958,000 | 53,959,000 | 53,960,000 |
| 53,961,000 | 53,962,000 | 53,963,000 | 53,964,000 | 53,965,000 | 53,966,000 | 53,967,000 | 53,968,000 |
| 53,969,000 | 53,970,000 | 53,971,000 | 53,972,000 | 53,973,000 | 53,974,000 | 53,975,000 | 53,976,000 |
| 53,977,000 | 53,978,000 | 53,979,000 | 53,980,000 | 53,981,000 | 53,982,000 | 53,983,000 | 53,984,000 |
| 53,985,000 | 53,986,000 | 53,987,000 | 53,988,000 | 53,989,000 | 53,990,000 | 53,991,000 | 53,992,000 |
| 53,993,000 | 53,994,000 | 53,995,000 | 53,996,000 | 53,997,000 | 53,998,000 | 53,999,000 | 54,000,000 |
| 54,001,000 | 54,002,000 | 54,003,000 | 54,004,000 | 54,005,000 | 54,006,000 | 54,007,000 | 54,008,000 |
| 54,009,000 | 54,010,000 | 54,011,000 | 54,012,000 | 54,013,000 | 54,014,000 | 54,015,000 | 54,016,000 |
| 54,017,000 | 54,018,000 | 54,019,000 | 54,020,000 | 54,021,000 | 54,022,000 | 54,023,000 | 54,024,000 |
| 54,025,000 | 54,026,000 | 54,027,000 | 54,028,000 | 54,029,000 | 54,030,000 | 54,031,000 | 54,032,000 |
| 54,033,000 | 54,034,000 | 54,035,000 | 54,036,000 | 54,037,000 | 54,038,000 | 54,039,000 | 54,040,000 |
| 54,041,000 | 54,042,000 | 54,043,000 | 54,044,000 | 54,045,000 | 54,046,000 | 54,047,000 | 54,048,000 |
| 54,049,000 | 54,050,000 | 54,051,000 | 54,052,000 | 54,053,000 | 54,054,000 | 54,055,000 | 54,056,000 |
| 54,057,000 | 54,058,000 | 54,059,000 | 54,060,000 | 54,061,000 | 54,062,000 | 54,063,000 | 54,064,000 |
| 54,065,000 | 54,066,000 | 54,067,000 | 54,068,000 | 54,069,000 | 54,070,000 | 54,071,000 | 54,072,000 |
| 54,073,000 | 54,074,000 | 54,075,000 | 54,076,000 | 54,077,000 | 54,078,000 | 54,079,000 | 54,080,000 |
| 54,081,000 | 54,082,000 | 54,083,000 | 54,084,000 | 54,085,000 | 54,086,000 | 54,087,000 | 54,088,000 |
| 54,089,000 | 54,090,000 | 54,091,000 | 54,092,000 | 54,093,000 | 54,094,000 | 54,095,000 | 54,096,000 |

Supplemental Figure S8

|            |            |            |            |            |            |            |            |
|------------|------------|------------|------------|------------|------------|------------|------------|
| 54,097,000 | 54,098,000 | 54,099,000 | 54,100,000 | 54,101,000 | 54,102,000 | 54,103,000 | 54,104,000 |
| 54,105,000 | 54,106,000 | 54,107,000 | 54,108,000 | 54,109,000 | 54,110,000 | 54,111,000 | 54,112,000 |
| 54,113,000 | 54,114,000 | 54,115,000 | 54,116,000 | 54,117,000 | 54,118,000 | 54,119,000 | 54,120,000 |
| 54,121,000 | 54,122,000 | 54,123,000 | 54,124,000 | 54,125,000 | 54,126,000 | 54,127,000 | 54,128,000 |
| 54,129,000 | 54,130,000 | 54,131,000 | 54,132,000 | 54,133,000 | 54,134,000 | 54,135,000 | 54,136,000 |
| 54,137,000 | 54,138,000 | 54,139,000 | 54,140,000 | 54,141,000 | 54,142,000 | 54,143,000 | 54,144,000 |
| 54,145,000 | 54,146,000 | 54,147,000 | 54,148,000 | 54,149,000 | 54,150,000 | 54,151,000 | 54,152,000 |
| 54,153,000 | 54,154,000 | 54,155,000 | 54,156,000 | 54,157,000 | 54,158,000 | 54,159,000 | 54,160,000 |
| 54,161,000 | 54,162,000 | 54,163,000 | 54,164,000 | 54,165,000 | 54,166,000 | 54,167,000 | 54,168,000 |
| 54,169,000 | 54,170,000 | 54,171,000 | 54,172,000 | 54,173,000 | 54,174,000 | 54,175,000 | 54,176,000 |
| 54,177,000 | 54,178,000 | 54,179,000 | 54,180,000 | 54,181,000 | 54,182,000 | 54,183,000 | 54,184,000 |
| 54,185,000 | 54,186,000 | 54,187,000 | 54,188,000 | 54,189,000 | 54,190,000 | 54,191,000 | 54,192,000 |
| 54,193,000 | 54,194,000 | 54,195,000 | 54,196,000 | 54,197,000 | 54,198,000 | 54,199,000 | 54,200,000 |
| 54,201,000 | 54,202,000 | 54,203,000 | 54,204,000 | 54,205,000 | 54,206,000 | 54,207,000 | 54,208,000 |
| 54,209,000 | 54,210,000 | 54,211,000 | 54,212,000 | 54,213,000 | 54,214,000 | 54,215,000 | 54,216,000 |
| 54,217,000 | 54,218,000 | 54,219,000 | 54,220,000 | 54,221,000 | 54,222,000 | 54,223,000 | 54,224,000 |
| 54,225,000 | 54,226,000 | 54,227,000 | 54,228,000 | 54,229,000 | 54,230,000 | 54,231,000 | 54,232,000 |
| 54,233,000 | 54,234,000 | 54,235,000 | 54,236,000 | 54,237,000 | 54,238,000 | 54,239,000 | 54,240,000 |
| 54,241,000 | 54,242,000 | 54,243,000 | 54,244,000 | 54,245,000 | 54,246,000 | 54,247,000 | 54,248,000 |
| 54,249,000 | 54,250,000 | 54,251,000 | 54,252,000 | 54,253,000 | 54,254,000 | 54,255,000 | 54,256,000 |
| 54,257,000 | 54,258,000 | 54,259,000 | 54,260,000 | 54,261,000 | 54,262,000 | 54,263,000 | 54,264,000 |
| 54,265,000 | 54,266,000 | 54,267,000 | 54,268,000 | 54,269,000 | 54,270,000 | 54,271,000 | 54,272,000 |
| 54,273,000 | 54,274,000 | 54,275,000 | 54,276,000 | 54,277,000 | 54,278,000 | 54,279,000 | 54,280,000 |

NE  
←

Supplemental Figure S8

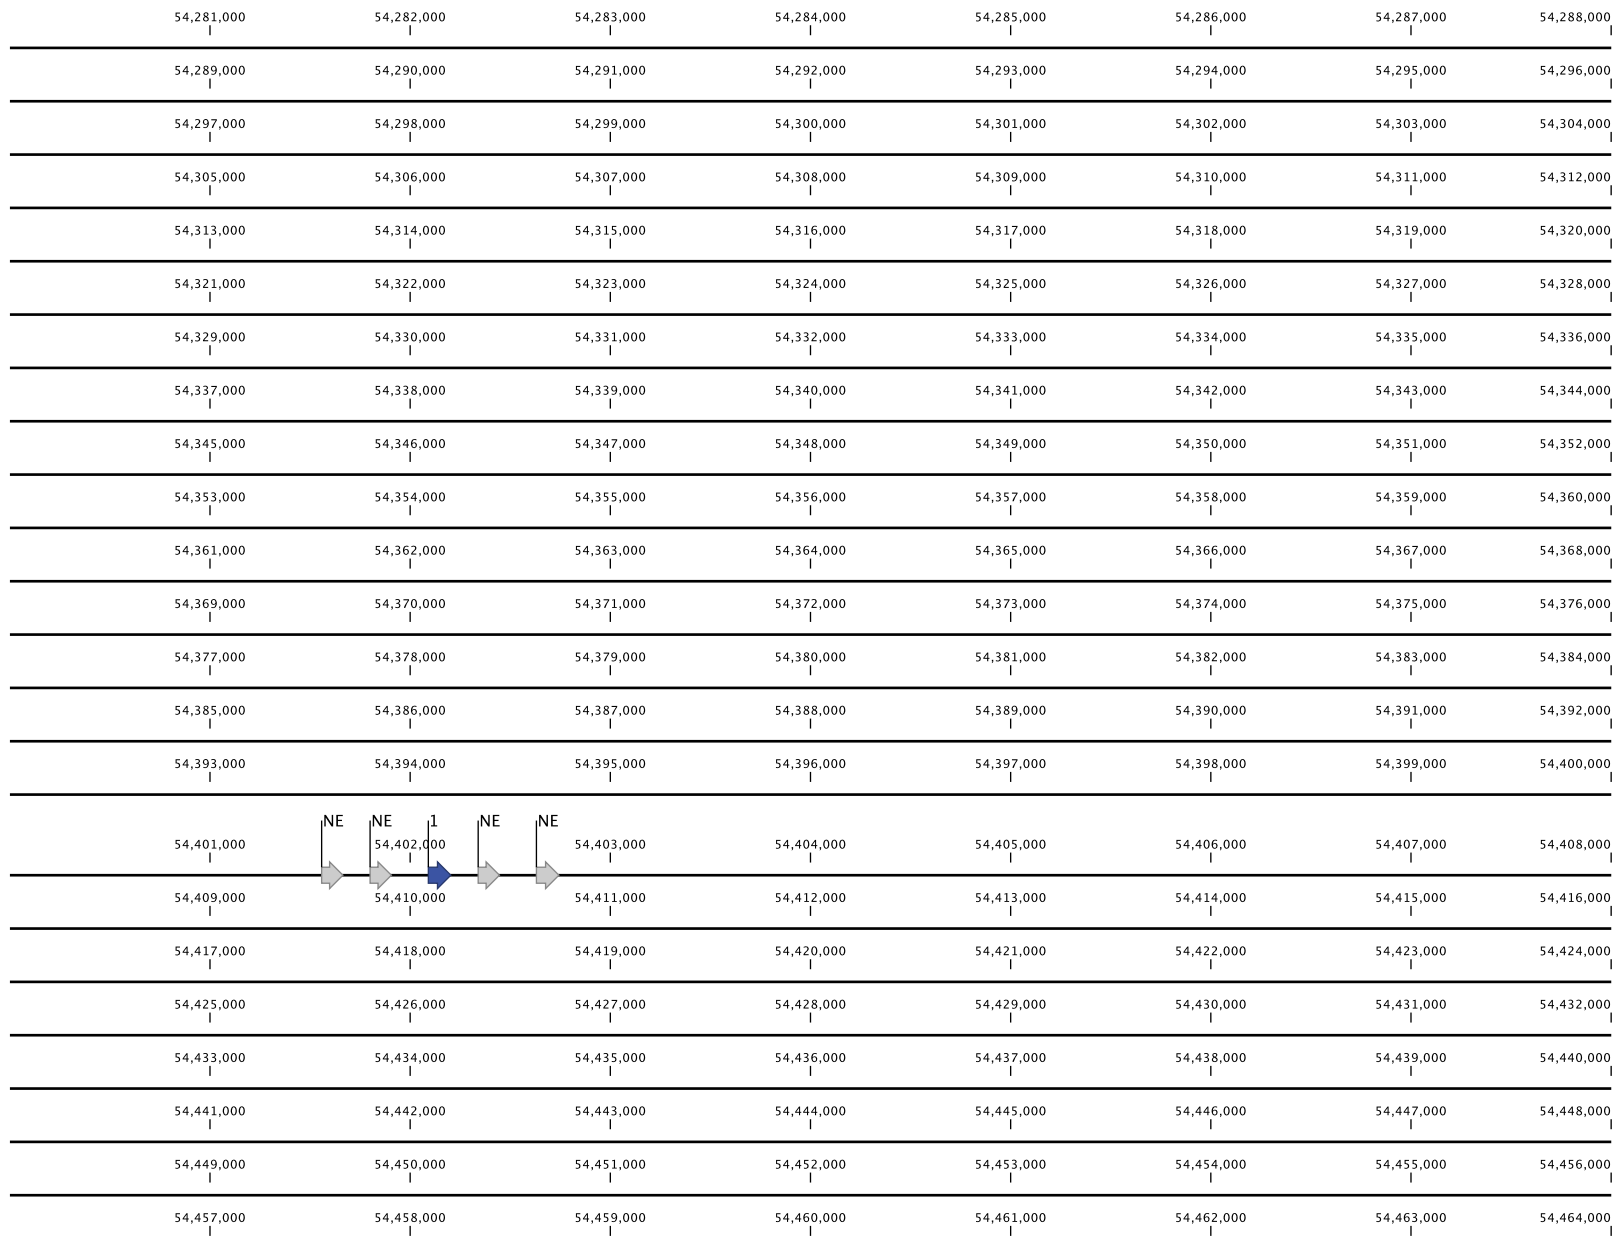

Supplemental Figure S8

|            |            |            |            |            |            |            |            |
|------------|------------|------------|------------|------------|------------|------------|------------|
| 54,465,000 | 54,466,000 | 54,467,000 | 54,468,000 | 54,469,000 | 54,470,000 | 54,471,000 | 54,472,000 |
| 54,473,000 | 54,474,000 | 54,475,000 | 54,476,000 | 54,477,000 | 54,478,000 | 54,479,000 | 54,480,000 |
| 54,481,000 | 54,482,000 | 54,483,000 | 54,484,000 | 54,485,000 | 54,486,000 | 54,487,000 | 54,488,000 |
| 54,489,000 | 54,490,000 | 54,491,000 | 54,492,000 | 54,493,000 | 54,494,000 | 54,495,000 | 54,496,000 |
| 54,497,000 | 54,498,000 | 54,499,000 | 54,500,000 | 54,501,000 | 54,502,000 | 54,503,000 | 54,504,000 |
| 54,505,000 | 54,506,000 | 54,507,000 | 54,508,000 | 54,509,000 | 54,510,000 | 54,511,000 | 54,512,000 |
| 54,513,000 | 54,514,000 | 54,515,000 | 54,516,000 | 54,517,000 | 54,518,000 | 54,519,000 | 54,520,000 |
| 54,521,000 | 54,522,000 | 54,523,000 | 54,524,000 | 54,525,000 | 54,526,000 | 54,527,000 | 54,528,000 |
| 54,529,000 | 54,530,000 | 54,531,000 | 54,532,000 | 54,533,000 | 54,534,000 | 54,535,000 | 54,536,000 |
| 54,537,000 | 54,538,000 | 54,539,000 | 54,540,000 | 54,541,000 | 54,542,000 | 54,543,000 | 54,544,000 |
| 54,545,000 | 54,546,000 | 54,547,000 | 54,548,000 | 54,549,000 | 54,550,000 | 54,551,000 | 54,552,000 |
| 54,553,000 | 54,554,000 | 54,555,000 | 54,556,000 | 54,557,000 | 54,558,000 | 54,559,000 | 54,560,000 |
| 54,561,000 | 54,562,000 | 54,563,000 | 54,564,000 | 54,565,000 | 54,566,000 | 54,567,000 | 54,568,000 |
| 54,569,000 | 54,570,000 | 54,571,000 | 54,572,000 | 54,573,000 | 54,574,000 | 54,575,000 | 54,576,000 |
| 54,577,000 | 54,578,000 | 54,579,000 | 54,580,000 | 54,581,000 | 54,582,000 | 54,583,000 | 54,584,000 |
| 54,585,000 | 54,586,000 | 54,587,000 | 54,588,000 | 54,589,000 | 54,590,000 | 54,591,000 | 54,592,000 |
| 54,593,000 | 54,594,000 | 54,595,000 | 54,596,000 | 54,597,000 | 54,598,000 | 54,599,000 | 54,600,000 |
| 54,601,000 | 54,602,000 | 54,603,000 | 54,604,000 | 54,605,000 | 54,606,000 | 54,607,000 | 54,608,000 |
| 54,609,000 | 54,610,000 | 54,611,000 | 54,612,000 | 54,613,000 | 54,614,000 | 54,615,000 | 54,616,000 |
| 54,617,000 | 54,618,000 | 54,619,000 | 54,620,000 | 54,621,000 | 54,622,000 | 54,623,000 | 54,624,000 |
| 54,625,000 | 54,626,000 | 54,627,000 | 54,628,000 | 54,629,000 | 54,630,000 | 54,631,000 | 54,632,000 |
| 54,633,000 | 54,634,000 | 54,635,000 | 54,636,000 | 54,637,000 | 54,638,000 | 54,639,000 | 54,640,000 |
| 54,641,000 | 54,642,000 | 54,643,000 | 54,644,000 | 54,645,000 | 54,646,000 | 54,647,000 | 54,648,000 |

Supplemental Figure S8

|            |            |            |            |            |            |            |            |
|------------|------------|------------|------------|------------|------------|------------|------------|
| 54,649,000 | 54,650,000 | 54,651,000 | 54,652,000 | 54,653,000 | 54,654,000 | 54,655,000 | 54,656,000 |
| 54,657,000 | 54,658,000 | 54,659,000 | 54,660,000 | 54,661,000 | 54,662,000 | 54,663,000 | 54,664,000 |
| 54,665,000 | 54,666,000 | 54,667,000 | 54,668,000 | 54,669,000 | 54,670,000 | 54,671,000 | 54,672,000 |
| 54,673,000 | 54,674,000 | 54,675,000 | 54,676,000 | 54,677,000 | 54,678,000 | 54,679,000 | 54,680,000 |
| 54,681,000 | 54,682,000 | 54,683,000 | 54,684,000 | 54,685,000 | 54,686,000 | 54,687,000 | 54,688,000 |
| 54,689,000 | 54,690,000 | 54,691,000 | 54,692,000 | 54,693,000 | 54,694,000 | 54,695,000 | 54,696,000 |
| 54,697,000 | 54,698,000 | 54,699,000 | 54,700,000 | 54,701,000 | 54,702,000 | 54,703,000 | 54,704,000 |
| 54,705,000 | 54,706,000 | 54,707,000 | 54,708,000 | 54,709,000 | 54,710,000 | 54,711,000 | 54,712,000 |
| 54,713,000 | 54,714,000 | 54,715,000 | 54,716,000 | 54,717,000 | 54,718,000 | 54,719,000 | 54,720,000 |
| 54,721,000 | 54,722,000 | 54,723,000 | 54,724,000 | 54,725,000 | 54,726,000 | 54,727,000 | 54,728,000 |
| 54,729,000 | 54,730,000 | 54,731,000 | 54,732,000 | 54,733,000 | 54,734,000 | 54,735,000 | 54,736,000 |
| 54,737,000 | 54,738,000 | 54,739,000 | 54,740,000 | 54,741,000 | 54,742,000 | 54,743,000 | 54,744,000 |
| 54,745,000 | 54,746,000 | 54,747,000 | 54,748,000 | 54,749,000 | 54,750,000 | 54,751,000 | 54,752,000 |
| 54,753,000 | 54,754,000 | 54,755,000 | 54,756,000 | 54,757,000 | 54,758,000 | 54,759,000 | 54,760,000 |
| 54,761,000 | 54,762,000 | 54,763,000 | 54,764,000 | 54,765,000 | 54,766,000 | 54,767,000 | 54,768,000 |
| 54,769,000 | 54,770,000 | 54,771,000 | 54,772,000 | 54,773,000 | 54,774,000 | 54,775,000 | 54,776,000 |
| 54,777,000 | 54,778,000 | 54,779,000 | 54,780,000 | 54,781,000 | 54,782,000 | 54,783,000 | 54,784,000 |
| 54,785,000 | 54,786,000 | 54,787,000 | 54,788,000 | 54,789,000 | 54,790,000 | 54,791,000 | 54,792,000 |
| 54,793,000 | 54,794,000 | 54,795,000 | 54,796,000 | 54,797,000 | 54,798,000 | 54,799,000 | 54,800,000 |
| 54,801,000 | 54,802,000 | 54,803,000 | 54,804,000 | 54,805,000 | 54,806,000 | 54,807,000 | 54,808,000 |
| 54,809,000 | 54,810,000 | 54,811,000 | 54,812,000 | 54,813,000 | 54,814,000 | 54,815,000 | 54,816,000 |
| 54,817,000 | 54,818,000 | 54,819,000 | 54,820,000 | 54,821,000 | 54,822,000 | 54,823,000 | 54,824,000 |
| 54,825,000 | 54,826,000 | 54,827,000 | 54,828,000 | 54,829,000 | 54,830,000 | 54,831,000 | 54,832,000 |

Supplemental Figure S8

|            |            |            |            |            |            |            |            |
|------------|------------|------------|------------|------------|------------|------------|------------|
| 54,833,000 | 54,834,000 | 54,835,000 | 54,836,000 | 54,837,000 | 54,838,000 | 54,839,000 | 54,840,000 |
| 54,841,000 | 54,842,000 | 54,843,000 | 54,844,000 | 54,845,000 | 54,846,000 | 54,847,000 | 54,848,000 |
| 54,849,000 | 54,850,000 | 54,851,000 | 54,852,000 | 54,853,000 | 54,854,000 | 54,855,000 | 54,856,000 |
| 54,857,000 | 54,858,000 | 54,859,000 | 54,860,000 | 54,861,000 | 54,862,000 | 54,863,000 | 54,864,000 |
| 54,865,000 | 54,866,000 | 54,867,000 | 54,868,000 | 54,869,000 | 54,870,000 | 54,871,000 | 54,872,000 |
| 54,873,000 | 54,874,000 | 54,875,000 | 54,876,000 | 54,877,000 | 54,878,000 | 54,879,000 | 54,880,000 |
| 54,881,000 | 54,882,000 | 54,883,000 | 54,884,000 | 54,885,000 | 54,886,000 | 54,887,000 | 54,888,000 |
| 54,889,000 | 54,890,000 | 54,891,000 | 54,892,000 | 54,893,000 | 54,894,000 | 54,895,000 | 54,896,000 |
| 54,897,000 | 54,898,000 | 54,899,000 | 54,900,000 | 54,901,000 | 54,902,000 | 54,903,000 | 54,904,000 |
| 54,905,000 | 54,906,000 | 54,907,000 | 54,908,000 | 54,909,000 | 54,910,000 | 54,911,000 | 54,912,000 |
| 54,913,000 | 54,914,000 | 54,915,000 | 54,916,000 | 54,917,000 | 54,918,000 | 54,919,000 | 54,920,000 |
| 54,921,000 | 54,922,000 | 54,923,000 | 54,924,000 | 54,925,000 | 54,926,000 | 54,927,000 | 54,928,000 |
| 54,929,000 | 54,930,000 | 54,931,000 | 54,932,000 | 54,933,000 | 54,934,000 | 54,935,000 | 54,936,000 |
| 54,937,000 | 54,938,000 | 54,939,000 | 54,940,000 | 54,941,000 | 54,942,000 | 54,943,000 | 54,944,000 |
| 54,945,000 | 54,946,000 | 54,947,000 | 54,948,000 | 54,949,000 | 54,950,000 | 54,951,000 | 54,952,000 |
| 54,953,000 | 54,954,000 | 54,955,000 | 54,956,000 | 54,957,000 | 54,958,000 | 54,959,000 | 54,960,000 |
| 54,961,000 | 54,962,000 | 54,963,000 | 54,964,000 | 54,965,000 | 54,966,000 | 54,967,000 | 54,968,000 |
| 54,969,000 | 54,970,000 | 54,971,000 | 54,972,000 | 54,973,000 | 54,974,000 | 54,975,000 | 54,976,000 |
| 54,977,000 | 54,978,000 | 54,979,000 | 54,980,000 | 54,981,000 | 54,982,000 | 54,983,000 | 54,984,000 |
| 54,985,000 | 54,986,000 | 54,987,000 | 54,988,000 | 54,989,000 | 54,990,000 | 54,991,000 | 54,992,000 |
| 54,993,000 | 54,994,000 | 54,995,000 | 54,996,000 | 54,997,000 | 54,998,000 | 54,999,000 | 55,000,000 |
| 55,001,000 | 55,002,000 | 55,003,000 | 55,004,000 | 55,005,000 | 55,006,000 | 55,007,000 | 55,008,000 |
| 55,009,000 | 55,010,000 | 55,011,000 | 55,012,000 | 55,013,000 | 55,014,000 | 55,015,000 | 55,016,000 |



Supplemental Figure S8

|            |            |            |            |            |            |            |            |
|------------|------------|------------|------------|------------|------------|------------|------------|
| 55,017,000 | 55,018,000 | 55,019,000 | 55,020,000 | 55,021,000 | 55,022,000 | 55,023,000 | 55,024,000 |
| 55,025,000 | 55,026,000 | 55,027,000 | 55,028,000 | 55,029,000 | 55,030,000 | 55,031,000 | 55,032,000 |
| 55,033,000 | 55,034,000 | 55,035,000 | 55,036,000 | 55,037,000 | 55,038,000 | 55,039,000 | 55,040,000 |
| 55,041,000 | 55,042,000 | 55,043,000 | 55,044,000 | 55,045,000 | 55,046,000 | 55,047,000 | 55,048,000 |
| 55,049,000 | 55,050,000 | 55,051,000 | 55,052,000 | 55,053,000 | 55,054,000 | 55,055,000 | 55,056,000 |
| 55,057,000 | 55,058,000 | 55,059,000 | 55,060,000 | 55,061,000 | 55,062,000 | 55,063,000 | 55,064,000 |
| 55,065,000 | 55,066,000 | 55,067,000 | 55,068,000 | 55,069,000 | 55,070,000 | 55,071,000 | 55,072,000 |
| 55,073,000 | 55,074,000 | 55,075,000 | 55,076,000 | 55,077,000 | 55,078,000 | 55,079,000 | 55,080,000 |
| 55,081,000 | 55,082,000 | 55,083,000 | 55,084,000 | 55,085,000 | 55,086,000 | 55,087,000 | 55,088,000 |
| 55,089,000 | 55,090,000 | 55,091,000 | 55,092,000 | 55,093,000 | 55,094,000 | 55,095,000 | 55,096,000 |
| 55,097,000 | 55,098,000 | 55,099,000 | 55,100,000 | 55,101,000 | 55,102,000 | 55,103,000 | 55,104,000 |
| 55,105,000 | 55,106,000 | 55,107,000 | 55,108,000 | 55,109,000 | 55,110,000 | 55,111,000 | 55,112,000 |
| 55,113,000 | 55,114,000 | 55,115,000 | 55,116,000 | 55,117,000 | 55,118,000 | 55,119,000 | 55,120,000 |
| 55,121,000 | 55,122,000 | 55,123,000 | 55,124,000 | 55,125,000 | 55,126,000 | 55,127,000 | 55,128,000 |
| 55,129,000 | 55,130,000 | 55,131,000 | 55,132,000 | 55,133,000 | 55,134,000 | 55,135,000 | 55,136,000 |
| 55,137,000 | 55,138,000 | 55,139,000 | 55,140,000 | 55,141,000 | 55,142,000 | 55,143,000 | 55,144,000 |
| 55,145,000 | 55,146,000 | 55,147,000 | 55,148,000 | 55,149,000 | 55,150,000 | 55,151,000 | 55,152,000 |
| 55,153,000 | 55,154,000 | 55,155,000 | 55,156,000 | 55,157,000 | 55,158,000 | 55,159,000 | 55,160,000 |
| 55,161,000 | 55,162,000 | 55,163,000 | 55,164,000 | 55,165,000 | 55,166,000 | 55,167,000 | 55,168,000 |
| 55,169,000 | 55,170,000 | 55,171,000 | 55,172,000 | 55,173,000 | 55,174,000 | 55,175,000 | 55,176,000 |
| 55,177,000 | 55,178,000 | 55,179,000 | 55,180,000 | 55,181,000 | 55,182,000 | 55,183,000 | 55,184,000 |
| 55,185,000 | 55,186,000 | 55,187,000 | 55,188,000 | 55,189,000 | 55,190,000 | 55,191,000 | 55,192,000 |
| 55,193,000 | 55,194,000 | 55,195,000 | 55,196,000 | 55,197,000 | 55,198,000 | 55,199,000 | 55,200,000 |

Supplemental Figure S8

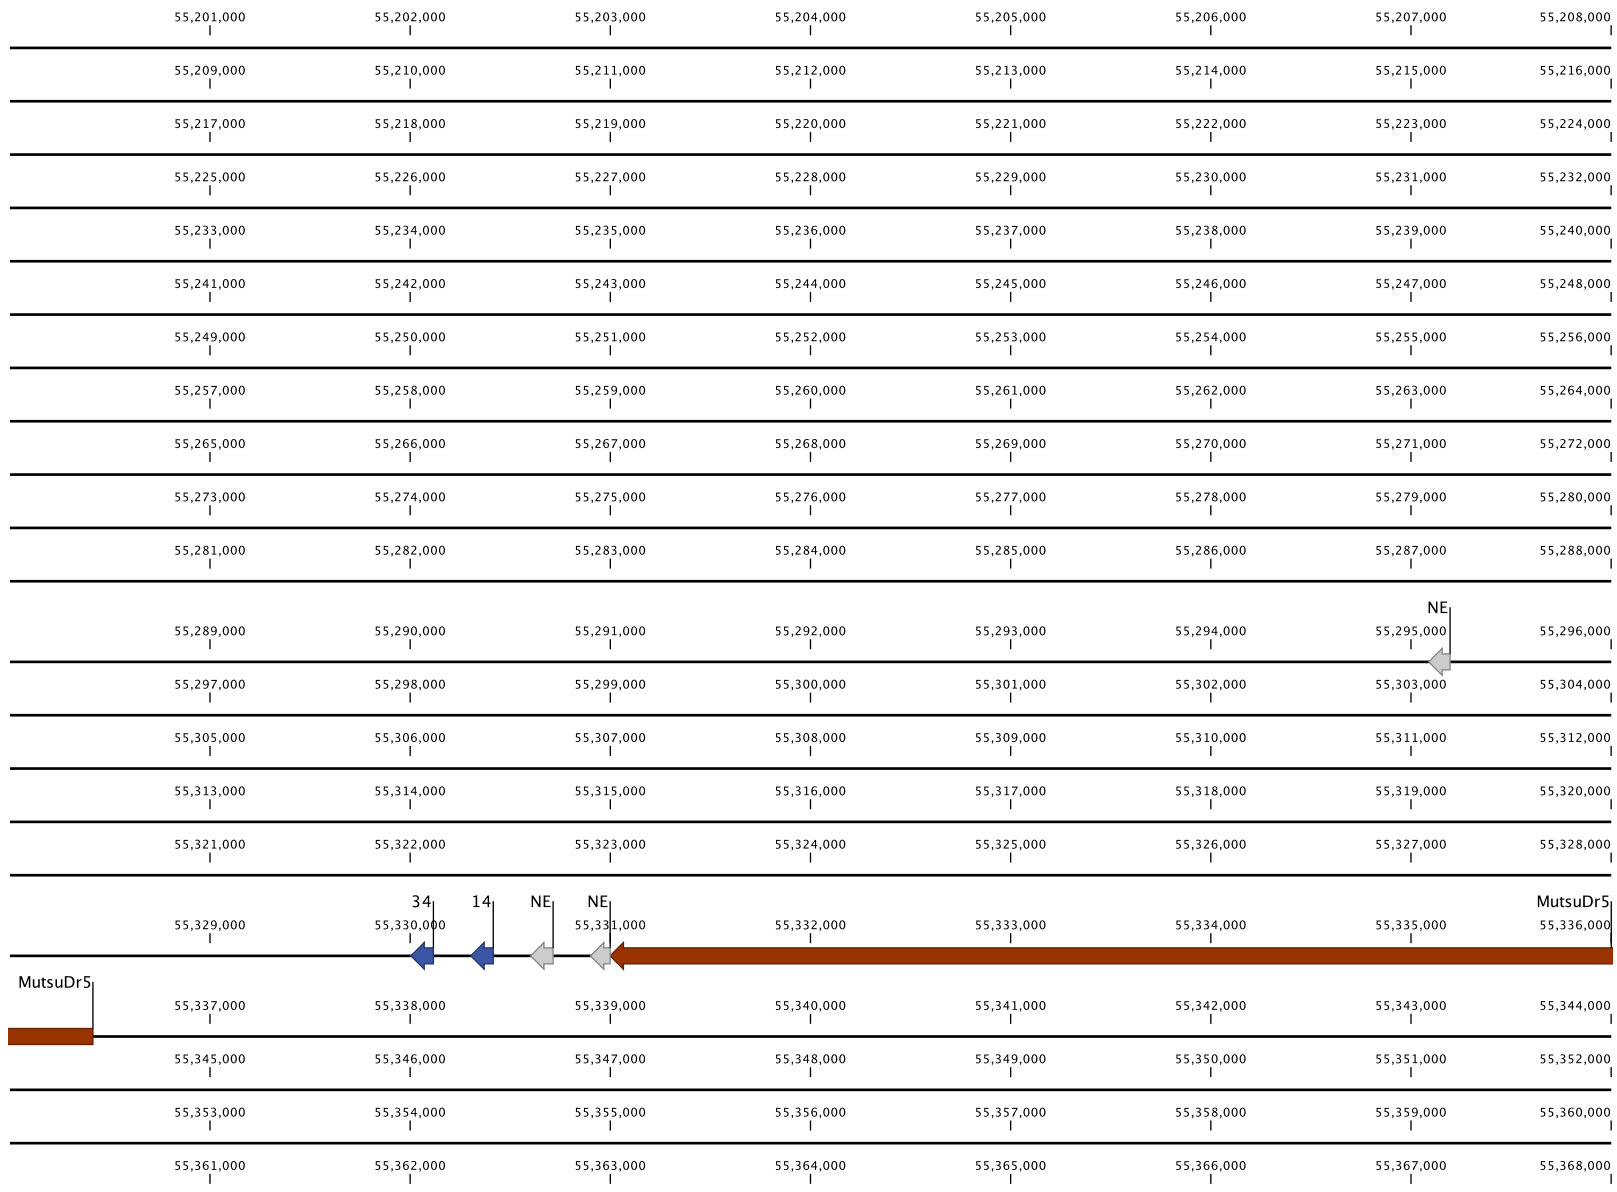

Supplemental Figure S8

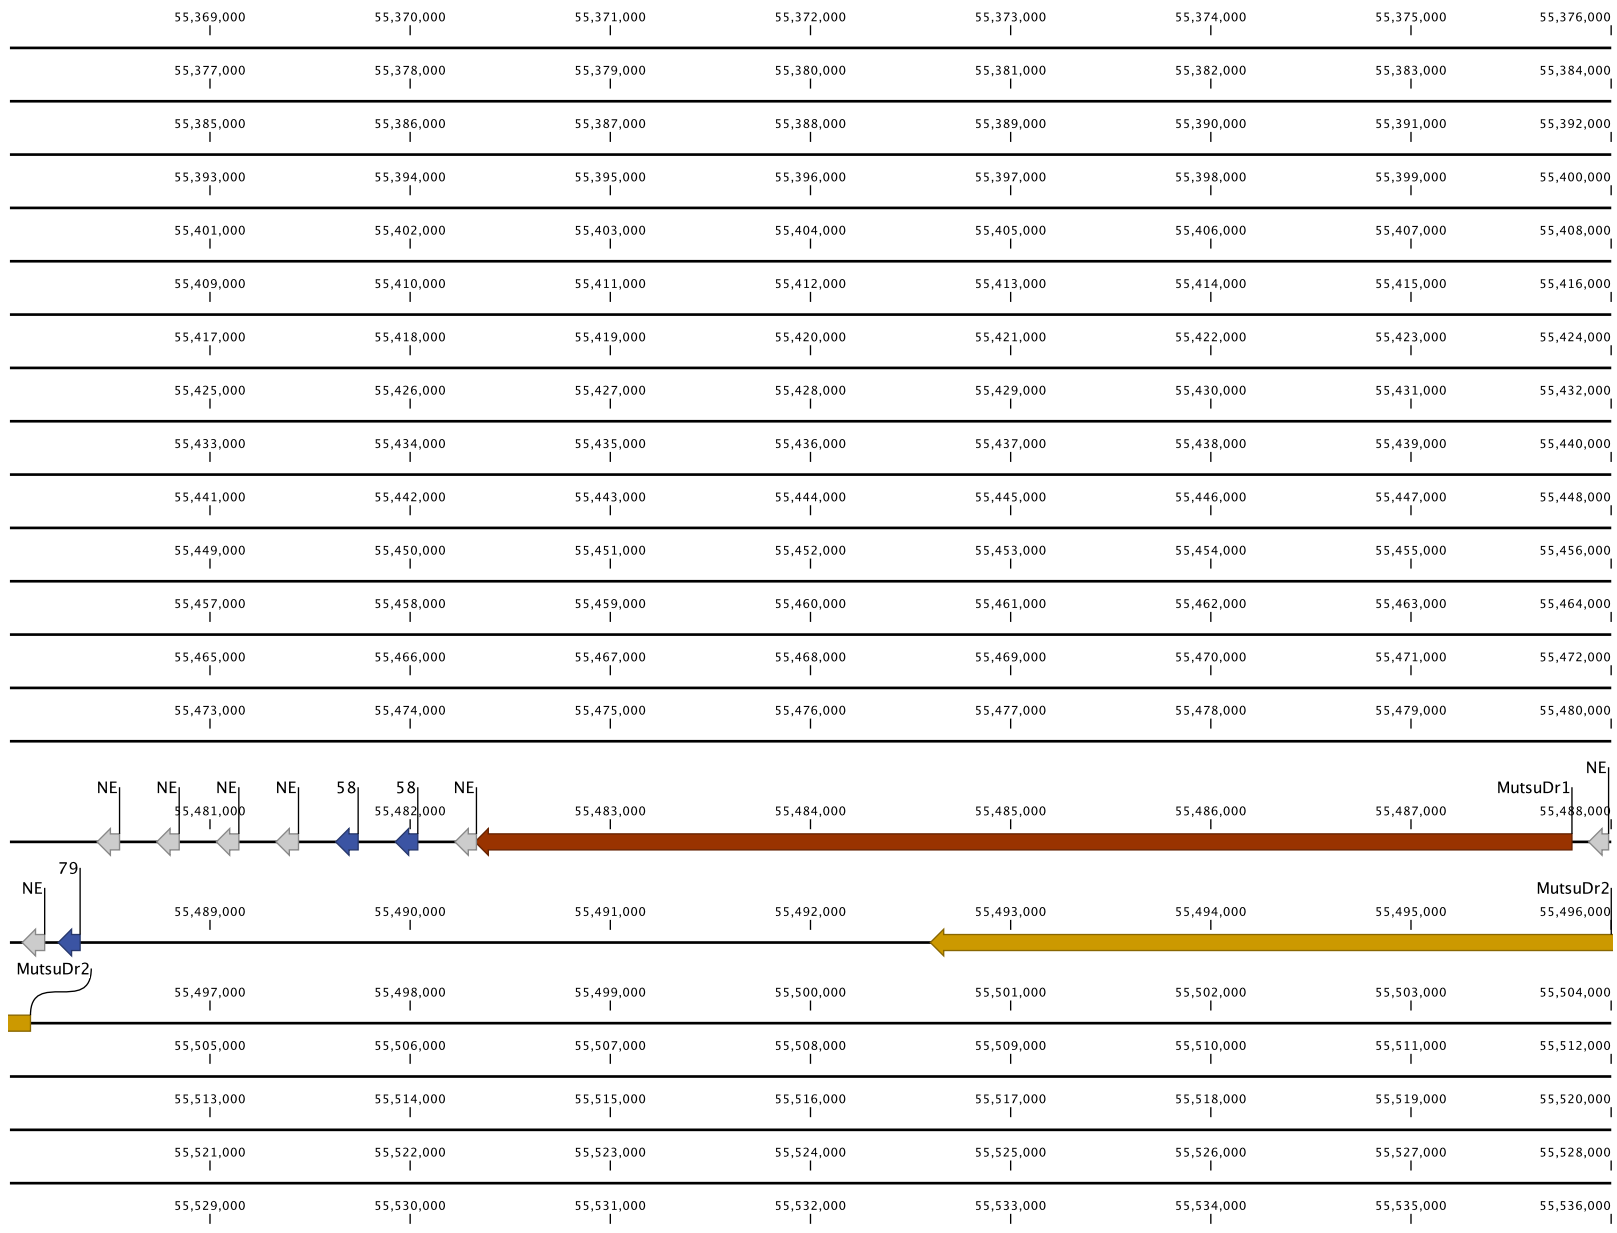

Supplemental Figure S8

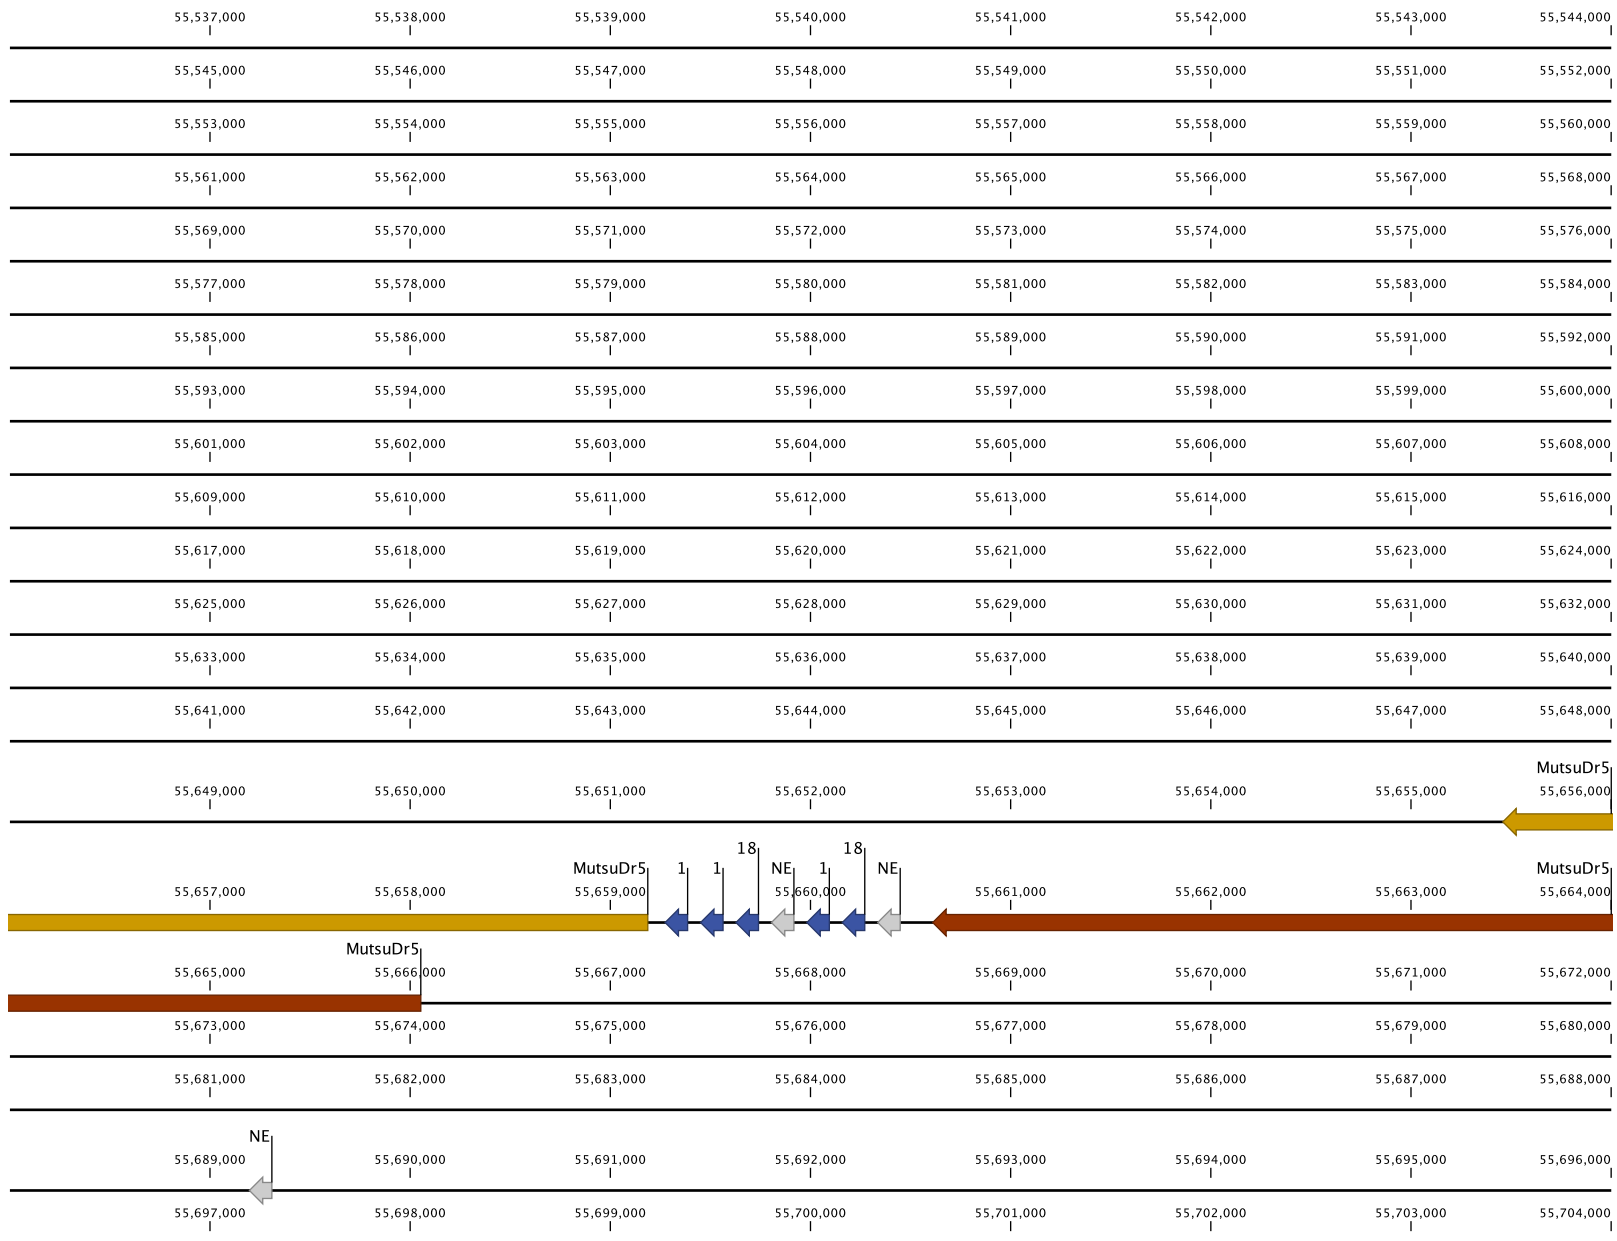

Supplemental Figure S8

|            |            |            |            |            |            |            |            |
|------------|------------|------------|------------|------------|------------|------------|------------|
| 55,705,000 | 55,706,000 | 55,707,000 | 55,708,000 | 55,709,000 | 55,710,000 | 55,711,000 | 55,712,000 |
| 55,713,000 | 55,714,000 | 55,715,000 | 55,716,000 | 55,717,000 | 55,718,000 | 55,719,000 | 55,720,000 |
| 55,721,000 | 55,722,000 | 55,723,000 | 55,724,000 | 55,725,000 | 55,726,000 | 55,727,000 | 55,728,000 |
| 55,729,000 | 55,730,000 | 55,731,000 | 55,732,000 | 55,733,000 | 55,734,000 | 55,735,000 | 55,736,000 |
| 55,737,000 | 55,738,000 | 55,739,000 | 55,740,000 | 55,741,000 | 55,742,000 | 55,743,000 | 55,744,000 |
| 55,745,000 | 55,746,000 | 55,747,000 | 55,748,000 | 55,749,000 | 55,750,000 | 55,751,000 | 55,752,000 |
| 55,753,000 | 55,754,000 | 55,755,000 | 55,756,000 | 55,757,000 | 55,758,000 | 55,759,000 | 55,760,000 |
| 55,761,000 | 55,762,000 | 55,763,000 | 55,764,000 | 55,765,000 | 55,766,000 | 55,767,000 | 55,768,000 |
| 55,769,000 | 55,770,000 | 55,771,000 | 55,772,000 | 55,773,000 | 55,774,000 | 55,775,000 | 55,776,000 |
| 55,777,000 | 55,778,000 | 55,779,000 | 55,780,000 | 55,781,000 | 55,782,000 | 55,783,000 | 55,784,000 |
| 55,785,000 | 55,786,000 | 55,787,000 | 55,788,000 | 55,789,000 | 55,790,000 | 55,791,000 | 55,792,000 |
| 55,793,000 | 55,794,000 | 55,795,000 | 55,796,000 | 55,797,000 | 55,798,000 | 55,799,000 | 55,800,000 |
| 55,801,000 | 55,802,000 | 55,803,000 | 55,804,000 | 55,805,000 | 55,806,000 | 55,807,000 | 55,808,000 |
| 55,809,000 | 55,810,000 | 55,811,000 | 55,812,000 | 55,813,000 | 55,814,000 | 55,815,000 | 55,816,000 |
| 55,817,000 | 55,818,000 | 55,819,000 | 55,820,000 | 55,821,000 | 55,822,000 | 55,823,000 | 55,824,000 |
| 55,825,000 | 55,826,000 | 55,827,000 | 55,828,000 | 55,829,000 | 55,830,000 | 55,831,000 | 55,832,000 |
| 55,833,000 | 55,834,000 | 55,835,000 | 55,836,000 | 55,837,000 | 55,838,000 | 55,839,000 | 55,840,000 |
| 55,841,000 | 55,842,000 | 55,843,000 | 55,844,000 | 55,845,000 | 55,846,000 | 55,847,000 | 55,848,000 |
| 55,849,000 | 55,850,000 | 55,851,000 | 55,852,000 | 55,853,000 | 55,854,000 | 55,855,000 | 55,856,000 |
| 55,857,000 | 55,858,000 | 55,859,000 | 55,860,000 | 55,861,000 | 55,862,000 | 55,863,000 | 55,864,000 |
| 55,865,000 | 55,866,000 | 55,867,000 | 55,868,000 | 55,869,000 | 55,870,000 | 55,871,000 | 55,872,000 |
| 55,873,000 | 55,874,000 | 55,875,000 | 55,876,000 | 55,877,000 | 55,878,000 | 55,879,000 | 55,880,000 |
| 55,881,000 | 55,882,000 | 55,883,000 | 55,884,000 | 55,885,000 | 55,886,000 | 55,887,000 | 55,888,000 |

NE

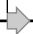

Supplemental Figure S8

|            |            |            |            |            |            |            |            |
|------------|------------|------------|------------|------------|------------|------------|------------|
| 55,889,000 | 55,890,000 | 55,891,000 | 55,892,000 | 55,893,000 | 55,894,000 | 55,895,000 | 55,896,000 |
| 55,897,000 | 55,898,000 | 55,899,000 | 55,900,000 | 55,901,000 | 55,902,000 | 55,903,000 | 55,904,000 |
| 55,905,000 | 55,906,000 | 55,907,000 | 55,908,000 | 55,909,000 | 55,910,000 | 55,911,000 | 55,912,000 |
| 55,913,000 | 55,914,000 | 55,915,000 | 55,916,000 | 55,917,000 | 55,918,000 | 55,919,000 | 55,920,000 |
| 55,921,000 | 55,922,000 | 55,923,000 | 55,924,000 | 55,925,000 | 55,926,000 | 55,927,000 | 55,928,000 |
| 55,929,000 | 55,930,000 | 55,931,000 | 55,932,000 | 55,933,000 | 55,934,000 | 55,935,000 | 55,936,000 |
| 55,937,000 | 55,938,000 | 55,939,000 | 55,940,000 | 55,941,000 | 55,942,000 | 55,943,000 | 55,944,000 |
| 55,945,000 | 55,946,000 | 55,947,000 | 55,948,000 | 55,949,000 | 55,950,000 | 55,951,000 | 55,952,000 |
| 55,953,000 | 55,954,000 | 55,955,000 | 55,956,000 | 55,957,000 | 55,958,000 | 55,959,000 | 55,960,000 |
| 55,961,000 | 55,962,000 | 55,963,000 | 55,964,000 | 55,965,000 | 55,966,000 | 55,967,000 | 55,968,000 |
| 55,969,000 | 55,970,000 | 55,971,000 | 55,972,000 | 55,973,000 | 55,974,000 | 55,975,000 | 55,976,000 |
| 55,977,000 | 55,978,000 | 55,979,000 | 55,980,000 | 55,981,000 | 55,982,000 | 55,983,000 | 55,984,000 |
| 55,985,000 | 55,986,000 | 55,987,000 | 55,988,000 | 55,989,000 | 55,990,000 | 55,991,000 | 55,992,000 |
| 55,993,000 | 55,994,000 | 55,995,000 | 55,996,000 | 55,997,000 | 55,998,000 | 55,999,000 | 56,000,000 |
| 56,001,000 | 56,002,000 | 56,003,000 | 56,004,000 | 56,005,000 | 56,006,000 | 56,007,000 | 56,008,000 |
| 56,009,000 | 56,010,000 | 56,011,000 | 56,012,000 | 56,013,000 | 56,014,000 | 56,015,000 | 56,016,000 |
| 56,017,000 | 56,018,000 | 56,019,000 | 56,020,000 | 56,021,000 | 56,022,000 | 56,023,000 | 56,024,000 |
| 56,025,000 | 56,026,000 | 56,027,000 | 56,028,000 | 56,029,000 | 56,030,000 | 56,031,000 | 56,032,000 |
| 56,033,000 | 56,034,000 | 56,035,000 | 56,036,000 | 56,037,000 | 56,038,000 | 56,039,000 | 56,040,000 |
| 56,041,000 | 56,042,000 | 56,043,000 | 56,044,000 | 56,045,000 | 56,046,000 | 56,047,000 | 56,048,000 |
| 56,049,000 | 56,050,000 | 56,051,000 | 56,052,000 | 56,053,000 | 56,054,000 | 56,055,000 | 56,056,000 |
| 56,057,000 | 56,058,000 | 56,059,000 | 56,060,000 | 56,061,000 | 56,062,000 | 56,063,000 | 56,064,000 |
| 56,065,000 | 56,066,000 | 56,067,000 | 56,068,000 | 56,069,000 | 56,070,000 | 56,071,000 | 56,072,000 |

Supplemental Figure S8

|            |            |            |            |            |            |            |            |
|------------|------------|------------|------------|------------|------------|------------|------------|
| 56,073,000 | 56,074,000 | 56,075,000 | 56,076,000 | 56,077,000 | 56,078,000 | 56,079,000 | 56,080,000 |
| 56,081,000 | 56,082,000 | 56,083,000 | 56,084,000 | 56,085,000 | 56,086,000 | 56,087,000 | 56,088,000 |
| 56,089,000 | 56,090,000 | 56,091,000 | 56,092,000 | 56,093,000 | 56,094,000 | 56,095,000 | 56,096,000 |
| 56,097,000 | 56,098,000 | 56,099,000 | 56,100,000 | 56,101,000 | 56,102,000 | 56,103,000 | 56,104,000 |
| 56,105,000 | 56,106,000 | 56,107,000 | 56,108,000 | 56,109,000 | 56,110,000 | 56,111,000 | 56,112,000 |
| 56,113,000 | 56,114,000 | 56,115,000 | 56,116,000 | 56,117,000 | 56,118,000 | 56,119,000 | 56,120,000 |
| 56,121,000 | 56,122,000 | 56,123,000 | 56,124,000 | 56,125,000 | 56,126,000 | 56,127,000 | 56,128,000 |
| 56,129,000 | 56,130,000 | 56,131,000 | 56,132,000 | 56,133,000 | 56,134,000 | 56,135,000 | 56,136,000 |
| 56,137,000 | 56,138,000 | 56,139,000 | 56,140,000 | 56,141,000 | 56,142,000 | 56,143,000 | 56,144,000 |
| 56,145,000 | 56,146,000 | 56,147,000 | 56,148,000 | 56,149,000 | 56,150,000 | 56,151,000 | 56,152,000 |
| 56,153,000 | 56,154,000 | 56,155,000 | 56,156,000 | 56,157,000 | 56,158,000 | 56,159,000 | 56,160,000 |
| 56,161,000 | 56,162,000 | 56,163,000 | 56,164,000 | 56,165,000 | 56,166,000 | 56,167,000 | 56,168,000 |
| 56,169,000 | 56,170,000 | 56,171,000 | 56,172,000 | 56,173,000 | 56,174,000 | 56,175,000 | 56,176,000 |
| 56,177,000 | 56,178,000 | 56,179,000 | 56,180,000 | 56,181,000 | 56,182,000 | 56,183,000 | 56,184,000 |
| 56,185,000 | 56,186,000 | 56,187,000 | 56,188,000 | 56,189,000 | 56,190,000 | 56,191,000 | 56,192,000 |
| 56,193,000 | 56,194,000 | 56,195,000 | 56,196,000 | 56,197,000 | 56,198,000 | 56,199,000 | 56,200,000 |
| 56,201,000 | 56,202,000 | 56,203,000 | 56,204,000 | 56,205,000 | 56,206,000 | 56,207,000 | 56,208,000 |
| 56,209,000 | 56,210,000 | 56,211,000 | 56,212,000 | 56,213,000 | 56,214,000 | 56,215,000 | 56,216,000 |
| 56,217,000 | 56,218,000 | 56,219,000 | 56,220,000 | 56,221,000 | 56,222,000 | 56,223,000 | 56,224,000 |
| 56,225,000 | 56,226,000 | 56,227,000 | 56,228,000 | 56,229,000 | 56,230,000 | 56,231,000 | 56,232,000 |
| 56,233,000 | 56,234,000 | 56,235,000 | 56,236,000 | 56,237,000 | 56,238,000 | 56,239,000 | 56,240,000 |
| 56,241,000 | 56,242,000 | 56,243,000 | 56,244,000 | 56,245,000 | 56,246,000 | 56,247,000 | 56,248,000 |
| 56,249,000 | 56,250,000 | 56,251,000 | 56,252,000 | 56,253,000 | 56,254,000 | 56,255,000 | 56,256,000 |

Supplemental Figure S8

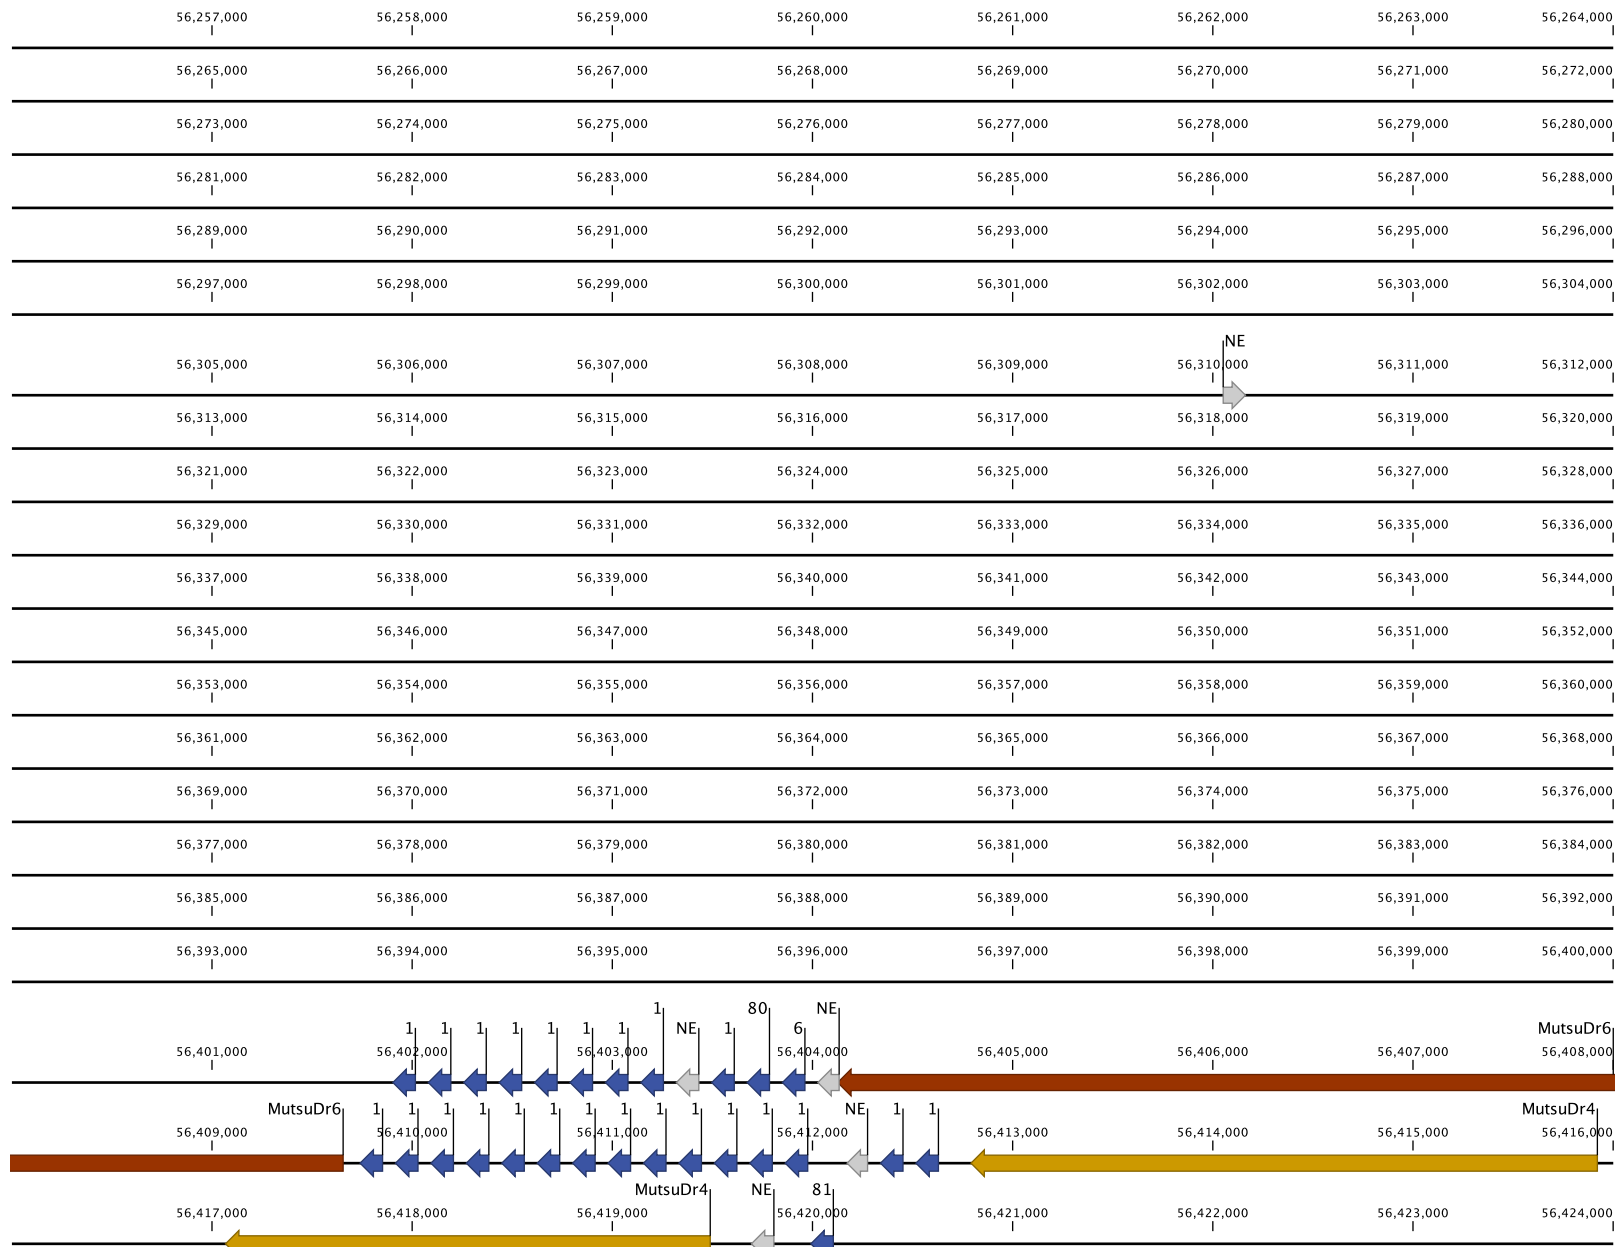



Supplemental Figure S8

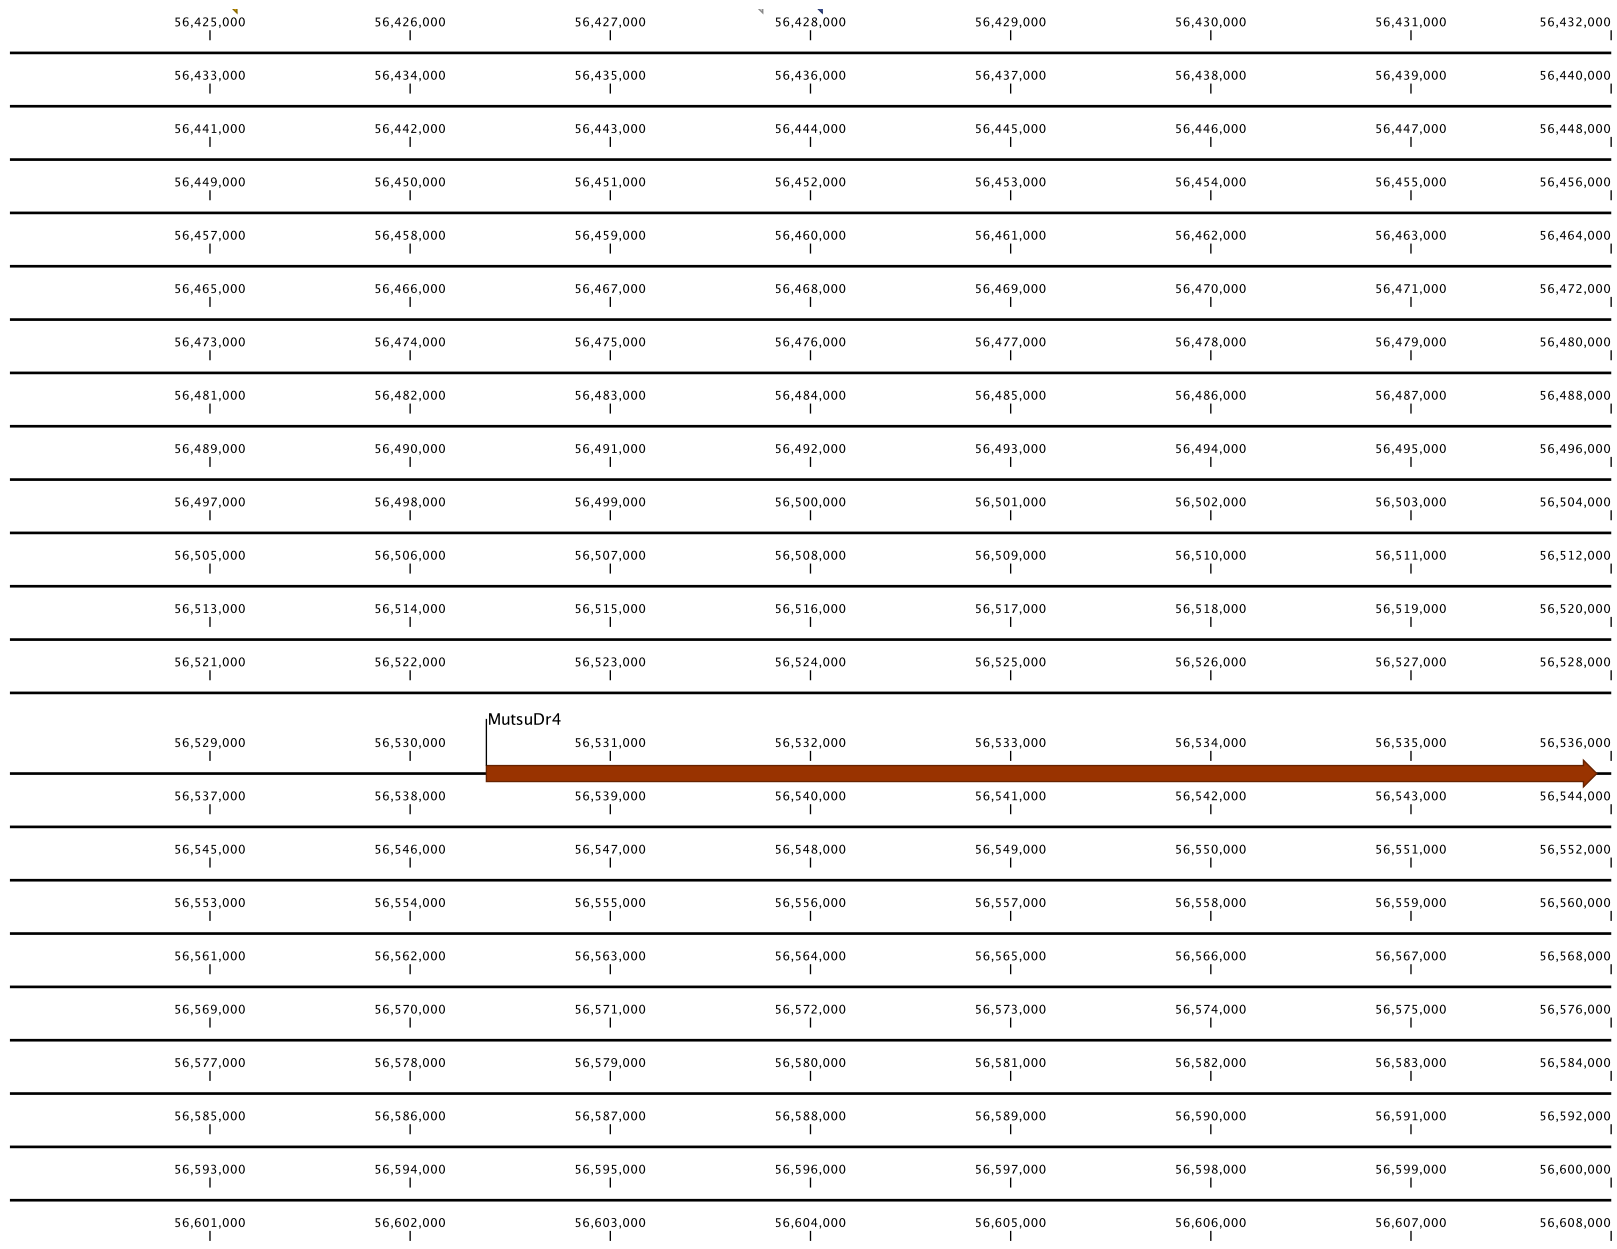

Supplemental Figure S8

|            |            |            |            |            |            |            |            |
|------------|------------|------------|------------|------------|------------|------------|------------|
| 56,609,000 | 56,610,000 | 56,611,000 | 56,612,000 | 56,613,000 | 56,614,000 | 56,615,000 | 56,616,000 |
| 56,617,000 | 56,618,000 | 56,619,000 | 56,620,000 | 56,621,000 | 56,622,000 | 56,623,000 | 56,624,000 |
| 56,625,000 | 56,626,000 | 56,627,000 | 56,628,000 | 56,629,000 | 56,630,000 | 56,631,000 | 56,632,000 |
| 56,633,000 | 56,634,000 | 56,635,000 | 56,636,000 | 56,637,000 | 56,638,000 | 56,639,000 | 56,640,000 |
| 56,641,000 | 56,642,000 | 56,643,000 | 56,644,000 | 56,645,000 | 56,646,000 | 56,647,000 | 56,648,000 |
| 56,649,000 | 56,650,000 | 56,651,000 | 56,652,000 | 56,653,000 | 56,654,000 | 56,655,000 | 56,656,000 |
| 56,657,000 | 56,658,000 | 56,659,000 | 56,660,000 | 56,661,000 | 56,662,000 | 56,663,000 | 56,664,000 |
| 56,665,000 | 56,666,000 | 56,667,000 | 56,668,000 | 56,669,000 | 56,670,000 | 56,671,000 | 56,672,000 |
| 56,673,000 | 56,674,000 | 56,675,000 | 56,676,000 | 56,677,000 | 56,678,000 | 56,679,000 | 56,680,000 |
| 56,681,000 | 56,682,000 | 56,683,000 | 56,684,000 | 56,685,000 | 56,686,000 | 56,687,000 | 56,688,000 |
| 56,689,000 | 56,690,000 | 56,691,000 | 56,692,000 | 56,693,000 | 56,694,000 | 56,695,000 | 56,696,000 |
| 56,697,000 | 56,698,000 | 56,699,000 | 56,700,000 | 56,701,000 | 56,702,000 | 56,703,000 | 56,704,000 |
| 56,705,000 | 56,706,000 | 56,707,000 | 56,708,000 | 56,709,000 | 56,710,000 | 56,711,000 | 56,712,000 |
| 56,713,000 | 56,714,000 | 56,715,000 | 56,716,000 | 56,717,000 | 56,718,000 | 56,719,000 | 56,720,000 |
| 56,721,000 | 56,722,000 | 56,723,000 | 56,724,000 | 56,725,000 | 56,726,000 | 56,727,000 | 56,728,000 |
| 56,729,000 | 56,730,000 | 56,731,000 | 56,732,000 | 56,733,000 | 56,734,000 | 56,735,000 | 56,736,000 |
| 56,737,000 | 56,738,000 | 56,739,000 | 56,740,000 | 56,741,000 | 56,742,000 | 56,743,000 | 56,744,000 |
| 56,745,000 | 56,746,000 | 56,747,000 | 56,748,000 | 56,749,000 | 56,750,000 | 56,751,000 | 56,752,000 |
| 56,753,000 | 56,754,000 | 56,755,000 | 56,756,000 | 56,757,000 | 56,758,000 | 56,759,000 | 56,760,000 |
| 56,761,000 | 56,762,000 | 56,763,000 | 56,764,000 | 56,765,000 | 56,766,000 | 56,767,000 | 56,768,000 |
| 56,769,000 | 56,770,000 | 56,771,000 | 56,772,000 | 56,773,000 | 56,774,000 | 56,775,000 | 56,776,000 |
| 56,777,000 | 56,778,000 | 56,779,000 | 56,780,000 | 56,781,000 | 56,782,000 | 56,783,000 | 56,784,000 |
| 56,785,000 | 56,786,000 | 56,787,000 | 56,788,000 | 56,789,000 | 56,790,000 | 56,791,000 | 56,792,000 |

Supplemental Figure S8

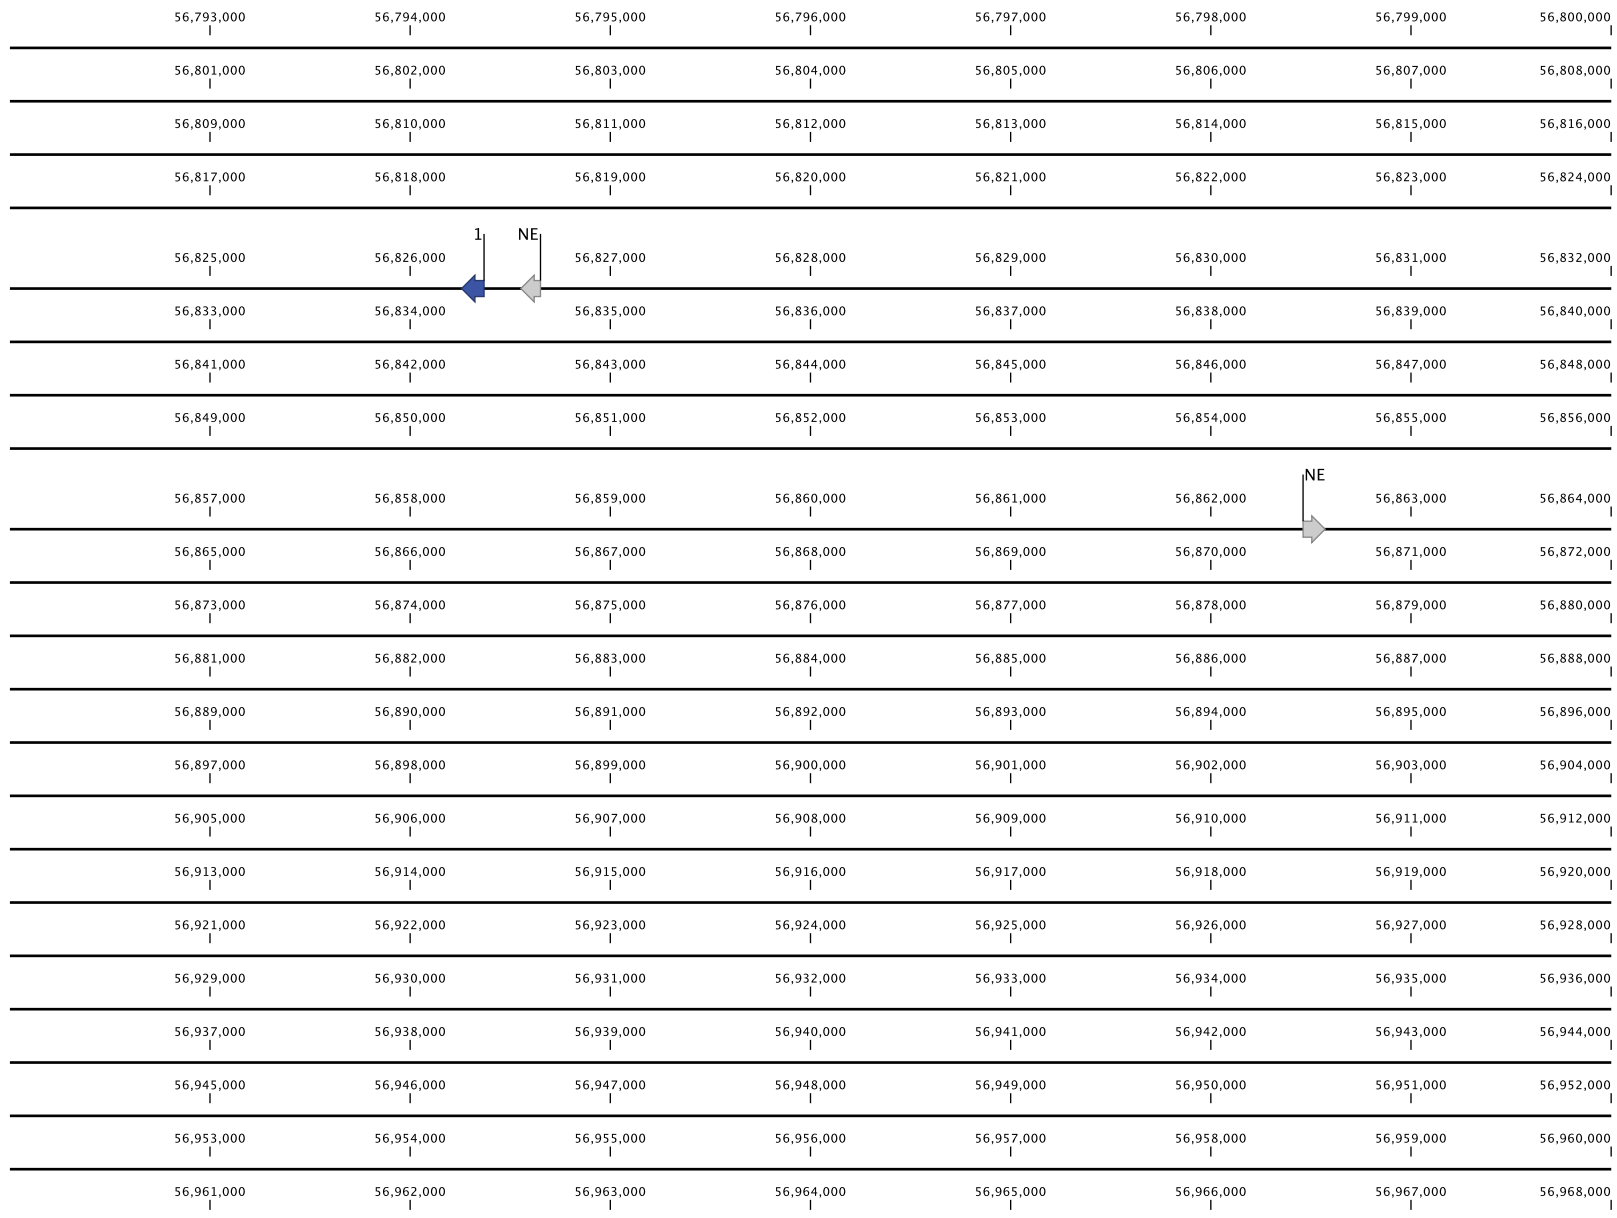

Supplemental Figure S8

|            |            |            |            |            |            |            |            |
|------------|------------|------------|------------|------------|------------|------------|------------|
| 56,969,000 | 56,970,000 | 56,971,000 | 56,972,000 | 56,973,000 | 56,974,000 | 56,975,000 | 56,976,000 |
| 56,977,000 | 56,978,000 | 56,979,000 | 56,980,000 | 56,981,000 | 56,982,000 | 56,983,000 | 56,984,000 |
| 56,985,000 | 56,986,000 | 56,987,000 | 56,988,000 | 56,989,000 | 56,990,000 | 56,991,000 | 56,992,000 |
| 56,993,000 | 56,994,000 | 56,995,000 | 56,996,000 | 56,997,000 | 56,998,000 | 56,999,000 | 57,000,000 |
| 57,001,000 | 57,002,000 | 57,003,000 | 57,004,000 | 57,005,000 | 57,006,000 | 57,007,000 | 57,008,000 |
| 57,009,000 | 57,010,000 | 57,011,000 | 57,012,000 | 57,013,000 | 57,014,000 | 57,015,000 | 57,016,000 |
| 57,017,000 | 57,018,000 | 57,019,000 | 57,020,000 | 57,021,000 | 57,022,000 | 57,023,000 | 57,024,000 |
| 57,025,000 | 57,026,000 | 57,027,000 | 57,028,000 | 57,029,000 | 57,030,000 | 57,031,000 | 57,032,000 |
| 57,033,000 | 57,034,000 | 57,035,000 | 57,036,000 | 57,037,000 | 57,038,000 | 57,039,000 | 57,040,000 |
| 57,041,000 | 57,042,000 | 57,043,000 | 57,044,000 | 57,045,000 | 57,046,000 | 57,047,000 | 57,048,000 |
| 57,049,000 | 57,050,000 | 57,051,000 | 57,052,000 | 57,053,000 | 57,054,000 | 57,055,000 | 57,056,000 |
| 57,057,000 | 57,058,000 | 57,059,000 | 57,060,000 | 57,061,000 | 57,062,000 | 57,063,000 | 57,064,000 |
| 57,065,000 | 57,066,000 | 57,067,000 | 57,068,000 | 57,069,000 | 57,070,000 | 57,071,000 | 57,072,000 |
| 57,073,000 | 57,074,000 | 57,075,000 | 57,076,000 | 57,077,000 | 57,078,000 | 57,079,000 | 57,080,000 |
| 57,081,000 | 57,082,000 | 57,083,000 | 57,084,000 | 57,085,000 | 57,086,000 | 57,087,000 | 57,088,000 |
| 57,089,000 | 57,090,000 | 57,091,000 | 57,092,000 | 57,093,000 | 57,094,000 | 57,095,000 | 57,096,000 |
| 57,097,000 | 57,098,000 | 57,099,000 | 57,100,000 | 57,101,000 | 57,102,000 | 57,103,000 | 57,104,000 |
| 57,105,000 | 57,106,000 | 57,107,000 | 57,108,000 | 57,109,000 | 57,110,000 | 57,111,000 | 57,112,000 |
| 57,113,000 | 57,114,000 | 57,115,000 | 57,116,000 | 57,117,000 | 57,118,000 | 57,119,000 | 57,120,000 |
| 57,121,000 | 57,122,000 | 57,123,000 | 57,124,000 | 57,125,000 | 57,126,000 | 57,127,000 | 57,128,000 |
| 57,129,000 | 57,130,000 | 57,131,000 | 57,132,000 | 57,133,000 | 57,134,000 | 57,135,000 | 57,136,000 |
| 57,137,000 | 57,138,000 | 57,139,000 | 57,140,000 | 57,141,000 | 57,142,000 | 57,143,000 | 57,144,000 |
| 57,145,000 | 57,146,000 | 57,147,000 | 57,148,000 | 57,149,000 | 57,150,000 | 57,151,000 | 57,152,000 |

NE

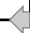

Supplemental Figure S8

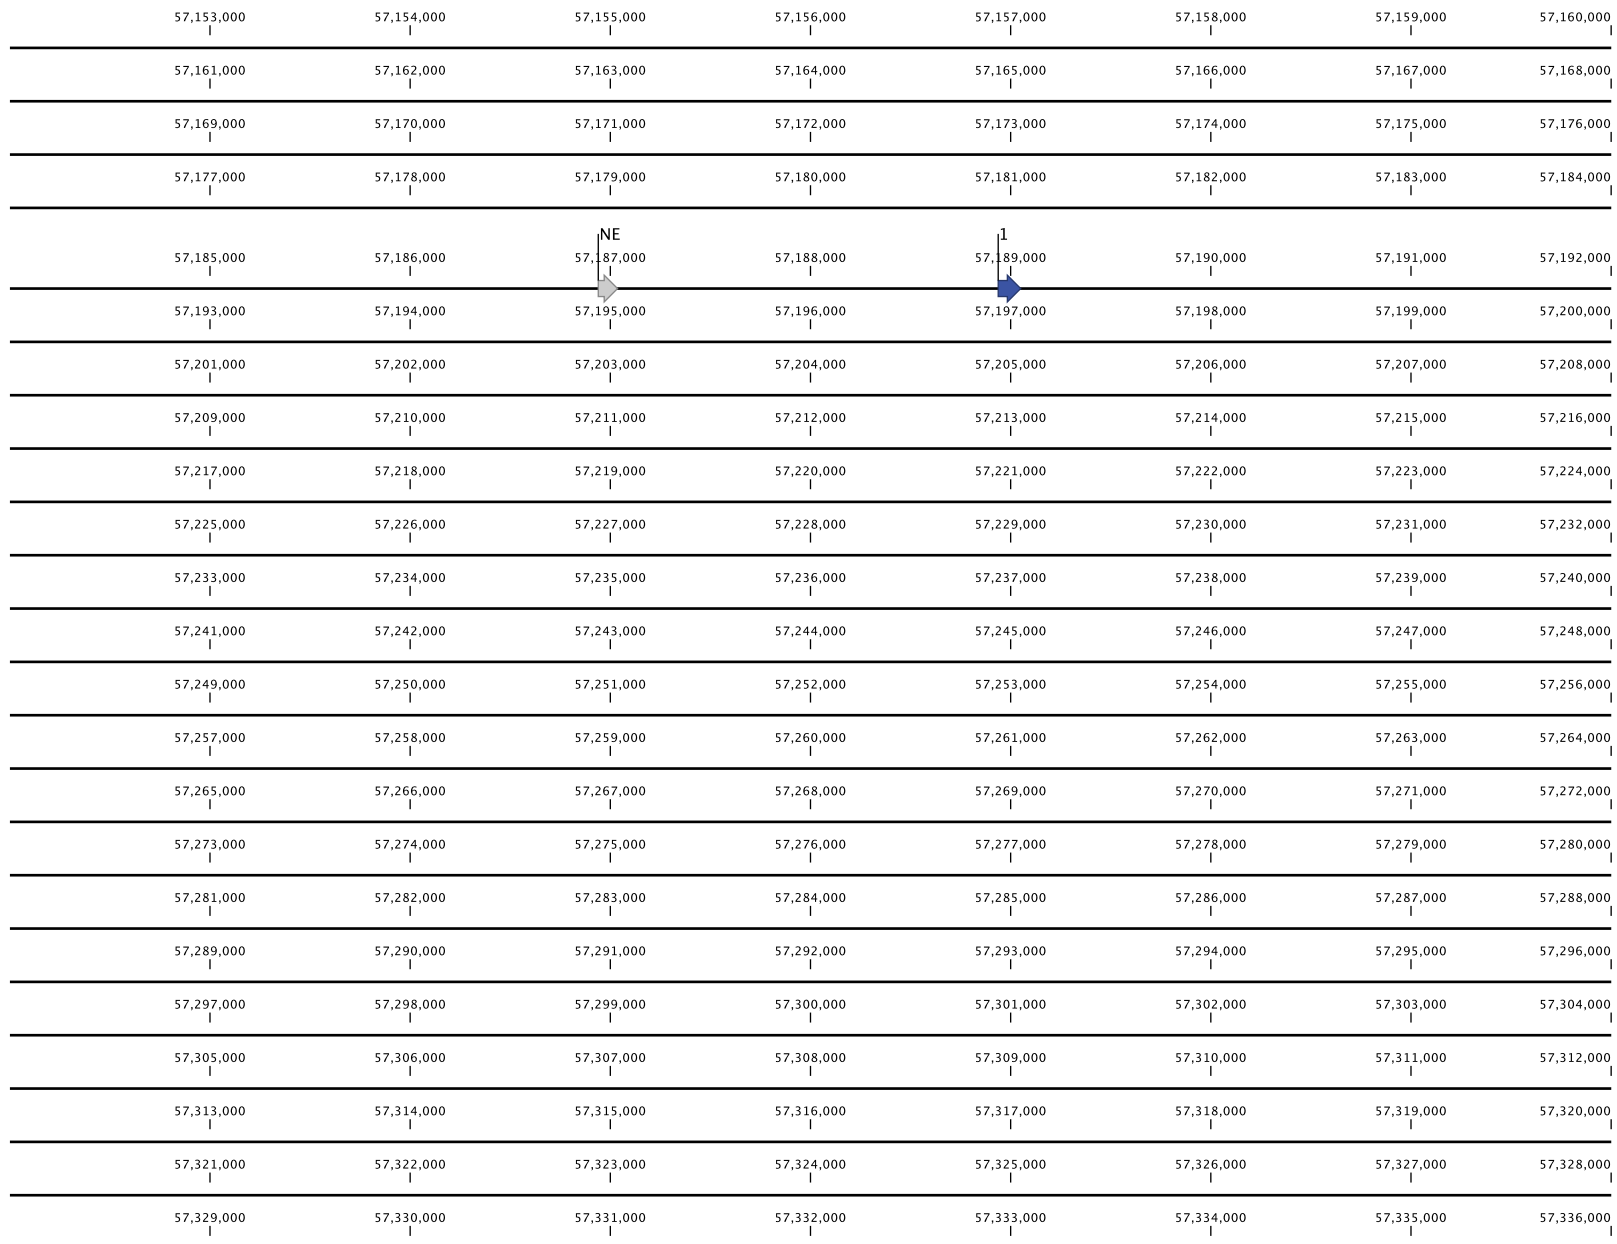

Supplemental Figure S8

|            |            |            |            |            |            |            |            |
|------------|------------|------------|------------|------------|------------|------------|------------|
| 57,337,000 | 57,338,000 | 57,339,000 | 57,340,000 | 57,341,000 | 57,342,000 | 57,343,000 | 57,344,000 |
| 57,345,000 | 57,346,000 | 57,347,000 | 57,348,000 | 57,349,000 | 57,350,000 | 57,351,000 | 57,352,000 |
| 57,353,000 | 57,354,000 | 57,355,000 | 57,356,000 | 57,357,000 | 57,358,000 | 57,359,000 | 57,360,000 |
| 57,361,000 | 57,362,000 | 57,363,000 | 57,364,000 | 57,365,000 | 57,366,000 | 57,367,000 | 57,368,000 |
| 57,369,000 | 57,370,000 | 57,371,000 | 57,372,000 | 57,373,000 | 57,374,000 | 57,375,000 | 57,376,000 |
| 57,377,000 | 57,378,000 | 57,379,000 | 57,380,000 | 57,381,000 | 57,382,000 | 57,383,000 | 57,384,000 |
| 57,385,000 | 57,386,000 | 57,387,000 | 57,388,000 | 57,389,000 | 57,390,000 | 57,391,000 | 57,392,000 |
| 57,393,000 | 57,394,000 | 57,395,000 | 57,396,000 | 57,397,000 | 57,398,000 | 57,399,000 | 57,400,000 |
| 57,401,000 | 57,402,000 | 57,403,000 | 57,404,000 | 57,405,000 | 57,406,000 | 57,407,000 | 57,408,000 |
| 57,409,000 | 57,410,000 | 57,411,000 | 57,412,000 | 57,413,000 | 57,414,000 | 57,415,000 | 57,416,000 |
| 57,417,000 | 57,418,000 | 57,419,000 | 57,420,000 | 57,421,000 | 57,422,000 | 57,423,000 | 57,424,000 |
| 57,425,000 | 57,426,000 | 57,427,000 | 57,428,000 | 57,429,000 | 57,430,000 | 57,431,000 | 57,432,000 |
| 57,433,000 | 57,434,000 | 57,435,000 | 57,436,000 | 57,437,000 | 57,438,000 | 57,439,000 | 57,440,000 |
| 57,441,000 | 57,442,000 | 57,443,000 | 57,444,000 | 57,445,000 | 57,446,000 | 57,447,000 | 57,448,000 |
| 57,449,000 | 57,450,000 | 57,451,000 | 57,452,000 | 57,453,000 | 57,454,000 | 57,455,000 | 57,456,000 |
| 57,457,000 | 57,458,000 | 57,459,000 | 57,460,000 | 57,461,000 | 57,462,000 | 57,463,000 | 57,464,000 |
| 57,465,000 | 57,466,000 | 57,467,000 | 57,468,000 | 57,469,000 | 57,470,000 | 57,471,000 | 57,472,000 |
| 57,473,000 | 57,474,000 | 57,475,000 | 57,476,000 | 57,477,000 | 57,478,000 | 57,479,000 | 57,480,000 |
| 57,481,000 | 57,482,000 | 57,483,000 | 57,484,000 | 57,485,000 | 57,486,000 | 57,487,000 | 57,488,000 |
| 57,489,000 | 57,490,000 | 57,491,000 | 57,492,000 | 57,493,000 | 57,494,000 | 57,495,000 | 57,496,000 |
| 57,497,000 | 57,498,000 | 57,499,000 | 57,500,000 | 57,501,000 | 57,502,000 | 57,503,000 | 57,504,000 |
| 57,505,000 | 57,506,000 | 57,507,000 | 57,508,000 | 57,509,000 | 57,510,000 | 57,511,000 | 57,512,000 |
| 57,513,000 | 57,514,000 | 57,515,000 | 57,516,000 | 57,517,000 | 57,518,000 | 57,519,000 | 57,520,000 |

Supplemental Figure S8

|            |            |            |            |            |            |            |            |
|------------|------------|------------|------------|------------|------------|------------|------------|
| 57,521,000 | 57,522,000 | 57,523,000 | 57,524,000 | 57,525,000 | 57,526,000 | 57,527,000 | 57,528,000 |
| 57,529,000 | 57,530,000 | 57,531,000 | 57,532,000 | 57,533,000 | 57,534,000 | 57,535,000 | 57,536,000 |
| 57,537,000 | 57,538,000 | 57,539,000 | 57,540,000 | 57,541,000 | 57,542,000 | 57,543,000 | 57,544,000 |
| 57,545,000 | 57,546,000 | 57,547,000 | 57,548,000 | 57,549,000 | 57,550,000 | 57,551,000 | 57,552,000 |
| 57,553,000 | 57,554,000 | 57,555,000 | 57,556,000 | 57,557,000 | 57,558,000 | 57,559,000 | 57,560,000 |
| 57,561,000 | 57,562,000 | 57,563,000 | 57,564,000 | 57,565,000 | 57,566,000 | 57,567,000 | 57,568,000 |
| 57,569,000 | 57,570,000 | 57,571,000 | 57,572,000 | 57,573,000 | 57,574,000 | 57,575,000 | 57,576,000 |
| 57,577,000 | 57,578,000 | 57,579,000 | 57,580,000 | 57,581,000 | 57,582,000 | 57,583,000 | 57,584,000 |
| 57,585,000 | 57,586,000 | 57,587,000 | 57,588,000 | 57,589,000 | 57,590,000 | 57,591,000 | 57,592,000 |
| 57,593,000 | 57,594,000 | 57,595,000 | 57,596,000 | 57,597,000 | 57,598,000 | 57,599,000 | 57,600,000 |
| 57,601,000 | 57,602,000 | 57,603,000 | 57,604,000 | 57,605,000 | 57,606,000 | 57,607,000 | 57,608,000 |
| 57,609,000 | 57,610,000 | 57,611,000 | 57,612,000 | 57,613,000 | 57,614,000 | 57,615,000 | 57,616,000 |
| 57,617,000 | 57,618,000 | 57,619,000 | 57,620,000 | 57,621,000 | 57,622,000 | 57,623,000 | 57,624,000 |
| 57,625,000 | 57,626,000 | 57,627,000 | 57,628,000 | 57,629,000 | 57,630,000 | 57,631,000 | 57,632,000 |
| 57,633,000 | 57,634,000 | 57,635,000 | 57,636,000 | 57,637,000 | 57,638,000 | 57,639,000 | 57,640,000 |
| 57,641,000 | 57,642,000 | 57,643,000 | 57,644,000 | 57,645,000 | 57,646,000 | 57,647,000 | 57,648,000 |
| 57,649,000 | 57,650,000 | 57,651,000 | 57,652,000 | 57,653,000 | 57,654,000 | 57,655,000 | 57,656,000 |
| 57,657,000 | 57,658,000 | 57,659,000 | 57,660,000 | 57,661,000 | 57,662,000 | 57,663,000 | 57,664,000 |
| 57,665,000 | 57,666,000 | 57,667,000 | 57,668,000 | 57,669,000 | 57,670,000 | 57,671,000 | 57,672,000 |
| 57,673,000 | 57,674,000 | 57,675,000 | 57,676,000 | 57,677,000 | 57,678,000 | 57,679,000 | 57,680,000 |
| 57,681,000 | 57,682,000 | 57,683,000 | 57,684,000 | 57,685,000 | 57,686,000 | 57,687,000 | 57,688,000 |
| 57,689,000 | 57,690,000 | 57,691,000 | 57,692,000 | 57,693,000 | 57,694,000 | 57,695,000 | 57,696,000 |
| 57,697,000 | 57,698,000 | 57,699,000 | 57,700,000 | 57,701,000 | 57,702,000 | 57,703,000 | 57,704,000 |

Supplemental Figure S8

|            |            |            |            |            |            |            |            |
|------------|------------|------------|------------|------------|------------|------------|------------|
| 57,705,000 | 57,706,000 | 57,707,000 | 57,708,000 | 57,709,000 | 57,710,000 | 57,711,000 | 57,712,000 |
| 57,713,000 | 57,714,000 | 57,715,000 | 57,716,000 | 57,717,000 | 57,718,000 | 57,719,000 | 57,720,000 |
| 57,721,000 | 57,722,000 | 57,723,000 | 57,724,000 | 57,725,000 | 57,726,000 | 57,727,000 | 57,728,000 |
| 57,729,000 | 57,730,000 | 57,731,000 | 57,732,000 | 57,733,000 | 57,734,000 | 57,735,000 | 57,736,000 |
| 57,737,000 | 57,738,000 | 57,739,000 | 57,740,000 | 57,741,000 | 57,742,000 | 57,743,000 | 57,744,000 |
| 57,745,000 | 57,746,000 | 57,747,000 | 57,748,000 | 57,749,000 | 57,750,000 | 57,751,000 | 57,752,000 |
| 57,753,000 | 57,754,000 | 57,755,000 | 57,756,000 | 57,757,000 | 57,758,000 | 57,759,000 | 57,760,000 |
| 57,761,000 | 57,762,000 | 57,763,000 | 57,764,000 | 57,765,000 | 57,766,000 | 57,767,000 | 57,768,000 |
| 57,769,000 | 57,770,000 | 57,771,000 | 57,772,000 | 57,773,000 | 57,774,000 | 57,775,000 | 57,776,000 |
| 57,777,000 | 57,778,000 | 57,779,000 | 57,780,000 | 57,781,000 | 57,782,000 | 57,783,000 | 57,784,000 |
| 57,785,000 | 57,786,000 | 57,787,000 | 57,788,000 | 57,789,000 | 57,790,000 | 57,791,000 | 57,792,000 |
| 57,793,000 | 57,794,000 | 57,795,000 | 57,796,000 | 57,797,000 | 57,798,000 | 57,799,000 | 57,800,000 |
| 57,801,000 | 57,802,000 | 57,803,000 | 57,804,000 | 57,805,000 | 57,806,000 | 57,807,000 | 57,808,000 |
| 57,809,000 | 57,810,000 | 57,811,000 | 57,812,000 | 57,813,000 | 57,814,000 | 57,815,000 | 57,816,000 |
| 57,817,000 | 57,818,000 | 57,819,000 | 57,820,000 | 57,821,000 | 57,822,000 | 57,823,000 | 57,824,000 |
| 57,825,000 | 57,826,000 | 57,827,000 | 57,828,000 | 57,829,000 | 57,830,000 | 57,831,000 | 57,832,000 |
| 57,833,000 | 57,834,000 | 57,835,000 | 57,836,000 | 57,837,000 | 57,838,000 | 57,839,000 | 57,840,000 |
| 57,841,000 | 57,842,000 | 57,843,000 | 57,844,000 | 57,845,000 | 57,846,000 | 57,847,000 | 57,848,000 |
| 57,849,000 | 57,850,000 | 57,851,000 | 57,852,000 | 57,853,000 | 57,854,000 | 57,855,000 | 57,856,000 |
| 57,857,000 | 57,858,000 | 57,859,000 | 57,860,000 | 57,861,000 | 57,862,000 | 57,863,000 | 57,864,000 |
| 57,865,000 | 57,866,000 | 57,867,000 | 57,868,000 | 57,869,000 | 57,870,000 | 57,871,000 | 57,872,000 |
| 57,873,000 | 57,874,000 | 57,875,000 | 57,876,000 | 57,877,000 | 57,878,000 | 57,879,000 | 57,880,000 |
| 57,881,000 | 57,882,000 | 57,883,000 | 57,884,000 | 57,885,000 | 57,886,000 | 57,887,000 | 57,888,000 |



Supplemental Figure S8

|            |            |            |            |            |            |            |            |
|------------|------------|------------|------------|------------|------------|------------|------------|
| 57,889,000 | 57,890,000 | 57,891,000 | 57,892,000 | 57,893,000 | 57,894,000 | 57,895,000 | 57,896,000 |
| 57,897,000 | 57,898,000 | 57,899,000 | 57,900,000 | 57,901,000 | 57,902,000 | 57,903,000 | 57,904,000 |
| 57,905,000 | 57,906,000 | 57,907,000 | 57,908,000 | 57,909,000 | 57,910,000 | 57,911,000 | 57,912,000 |
| 57,913,000 | 57,914,000 | 57,915,000 | 57,916,000 | 57,917,000 | 57,918,000 | 57,919,000 | 57,920,000 |
| 57,921,000 | 57,922,000 | 57,923,000 | 57,924,000 | 57,925,000 | 57,926,000 | 57,927,000 | 57,928,000 |
| 57,929,000 | 57,930,000 | 57,931,000 | 57,932,000 | 57,933,000 | 57,934,000 | 57,935,000 | 57,936,000 |
| 57,937,000 | 57,938,000 | 57,939,000 | 57,940,000 | 57,941,000 | 57,942,000 | 57,943,000 | 57,944,000 |
| 57,945,000 | 57,946,000 | 57,947,000 | 57,948,000 | 57,949,000 | 57,950,000 | 57,951,000 | 57,952,000 |
| 57,953,000 | 57,954,000 | 57,955,000 | 57,956,000 | 57,957,000 | 57,958,000 | 57,959,000 | 57,960,000 |
| 57,961,000 | 57,962,000 | 57,963,000 | 57,964,000 | 57,965,000 | 57,966,000 | 57,967,000 | 57,968,000 |
| 57,969,000 | 57,970,000 | 57,971,000 | 57,972,000 | 57,973,000 | 57,974,000 | 57,975,000 | 57,976,000 |
| 57,977,000 | 57,978,000 | 57,979,000 | 57,980,000 | 57,981,000 | 57,982,000 | 57,983,000 | 57,984,000 |
| 57,985,000 | 57,986,000 | 57,987,000 | 57,988,000 | 57,989,000 | 57,990,000 | 57,991,000 | 57,992,000 |
| 57,993,000 | 57,994,000 | 57,995,000 | 57,996,000 | 57,997,000 | 57,998,000 | 57,999,000 | 58,000,000 |
| 58,001,000 | 58,002,000 | 58,003,000 | 58,004,000 | 58,005,000 | 58,006,000 | 58,007,000 | 58,008,000 |
| 58,009,000 | 58,010,000 | 58,011,000 | 58,012,000 | 58,013,000 | 58,014,000 | 58,015,000 | 58,016,000 |
| 58,017,000 | 58,018,000 | 58,019,000 | 58,020,000 | 58,021,000 | 58,022,000 | 58,023,000 | 58,024,000 |
| 58,025,000 | 58,026,000 | 58,027,000 | 58,028,000 | 58,029,000 | 58,030,000 | 58,031,000 | 58,032,000 |
| 58,033,000 | 58,034,000 | 58,035,000 | 58,036,000 | 58,037,000 | 58,038,000 | 58,039,000 | 58,040,000 |
| 58,041,000 | 58,042,000 | 58,043,000 | 58,044,000 | 58,045,000 | 58,046,000 | 58,047,000 | 58,048,000 |
| 58,049,000 | 58,050,000 | 58,051,000 | 58,052,000 | 58,053,000 | 58,054,000 | 58,055,000 | 58,056,000 |
| 58,057,000 | 58,058,000 | 58,059,000 | 58,060,000 | 58,061,000 | 58,062,000 | 58,063,000 | 58,064,000 |
| 58,065,000 | 58,066,000 | 58,067,000 | 58,068,000 | 58,069,000 | 58,070,000 | 58,071,000 | 58,072,000 |

Supplemental Figure S8

|            |            |            |            |            |            |            |            |
|------------|------------|------------|------------|------------|------------|------------|------------|
| 58,073,000 | 58,074,000 | 58,075,000 | 58,076,000 | 58,077,000 | 58,078,000 | 58,079,000 | 58,080,000 |
| 58,081,000 | 58,082,000 | 58,083,000 | 58,084,000 | 58,085,000 | 58,086,000 | 58,087,000 | 58,088,000 |
| 58,089,000 | 58,090,000 | 58,091,000 | 58,092,000 | 58,093,000 | 58,094,000 | 58,095,000 | 58,096,000 |
| 58,097,000 | 58,098,000 | 58,099,000 | 58,100,000 | 58,101,000 | 58,102,000 | 58,103,000 | 58,104,000 |
| 58,105,000 | 58,106,000 | 58,107,000 | 58,108,000 | 58,109,000 | 58,110,000 | 58,111,000 | 58,112,000 |
| 58,113,000 | 58,114,000 | 58,115,000 | 58,116,000 | 58,117,000 | 58,118,000 | 58,119,000 | 58,120,000 |
| 58,121,000 | 58,122,000 | 58,123,000 | 58,124,000 | 58,125,000 | 58,126,000 | 58,127,000 | 58,128,000 |
| 58,129,000 | 58,130,000 | 58,131,000 | 58,132,000 | 58,133,000 | 58,134,000 | 58,135,000 | 58,136,000 |
| 58,137,000 | 58,138,000 | 58,139,000 | 58,140,000 | 58,141,000 | 58,142,000 | 58,143,000 | 58,144,000 |
| 58,145,000 | 58,146,000 | 58,147,000 | 58,148,000 | 58,149,000 | 58,150,000 | 58,151,000 | 58,152,000 |
| 58,153,000 | 58,154,000 | 58,155,000 | 58,156,000 | 58,157,000 | 58,158,000 | 58,159,000 | 58,160,000 |
| 58,161,000 | 58,162,000 | 58,163,000 | 58,164,000 | 58,165,000 | 58,166,000 | 58,167,000 | 58,168,000 |
| 58,169,000 | 58,170,000 | 58,171,000 | 58,172,000 | 58,173,000 | 58,174,000 | 58,175,000 | 58,176,000 |
| 58,177,000 | 58,178,000 | 58,179,000 | 58,180,000 | 58,181,000 | 58,182,000 | 58,183,000 | 58,184,000 |
| 58,185,000 | 58,186,000 | 58,187,000 | 58,188,000 | 58,189,000 | 58,190,000 | 58,191,000 | 58,192,000 |
| 58,193,000 | 58,194,000 | 58,195,000 | 58,196,000 | 58,197,000 | 58,198,000 | 58,199,000 | 58,200,000 |
| 58,201,000 | 58,202,000 | 58,203,000 | 58,204,000 | 58,205,000 | 58,206,000 | 58,207,000 | 58,208,000 |
| 58,209,000 | 58,210,000 | 58,211,000 | 58,212,000 | 58,213,000 | 58,214,000 | 58,215,000 | 58,216,000 |
| 58,217,000 | 58,218,000 | 58,219,000 | 58,220,000 | 58,221,000 | 58,222,000 | 58,223,000 | 58,224,000 |
| 58,225,000 | 58,226,000 | 58,227,000 | 58,228,000 | 58,229,000 | 58,230,000 | 58,231,000 | 58,232,000 |
| 58,233,000 | 58,234,000 | 58,235,000 | 58,236,000 | 58,237,000 | 58,238,000 | 58,239,000 | 58,240,000 |
| 58,241,000 | 58,242,000 | 58,243,000 | 58,244,000 | 58,245,000 | 58,246,000 | 58,247,000 | 58,248,000 |
| 58,249,000 | 58,250,000 | 58,251,000 | 58,252,000 | 58,253,000 | 58,254,000 | 58,255,000 | 58,256,000 |

Supplemental Figure S8

|            |            |            |            |            |            |            |            |
|------------|------------|------------|------------|------------|------------|------------|------------|
| 58,257,000 | 58,258,000 | 58,259,000 | 58,260,000 | 58,261,000 | 58,262,000 | 58,263,000 | 58,264,000 |
| 58,265,000 | 58,266,000 | 58,267,000 | 58,268,000 | 58,269,000 | 58,270,000 | 58,271,000 | 58,272,000 |
| 58,273,000 | 58,274,000 | 58,275,000 | 58,276,000 | 58,277,000 | 58,278,000 | 58,279,000 | 58,280,000 |
| 58,281,000 | 58,282,000 | 58,283,000 | 58,284,000 | 58,285,000 | 58,286,000 | 58,287,000 | 58,288,000 |
| 58,289,000 | 58,290,000 | 58,291,000 | 58,292,000 | 58,293,000 | 58,294,000 | 58,295,000 | 58,296,000 |
| 58,297,000 | 58,298,000 | 58,299,000 | 58,300,000 | 58,301,000 | 58,302,000 | 58,303,000 | 58,304,000 |
| 58,305,000 | 58,306,000 | 58,307,000 | 58,308,000 | 58,309,000 | 58,310,000 | 58,311,000 | 58,312,000 |
| 58,313,000 | 58,314,000 | 58,315,000 | 58,316,000 | 58,317,000 | 58,318,000 | 58,319,000 | 58,320,000 |
| 58,321,000 | 58,322,000 | 58,323,000 | 58,324,000 | 58,325,000 | 58,326,000 | 58,327,000 | 58,328,000 |
| 58,329,000 | 58,330,000 | 58,331,000 | 58,332,000 | 58,333,000 | 58,334,000 | 58,335,000 | 58,336,000 |
| 58,337,000 | 58,338,000 | 58,339,000 | 58,340,000 | 58,341,000 | 58,342,000 | 58,343,000 | 58,344,000 |
| 58,345,000 | 58,346,000 | 58,347,000 | 58,348,000 | 58,349,000 | 58,350,000 | 58,351,000 | 58,352,000 |
| 58,353,000 | 58,354,000 | 58,355,000 | 58,356,000 | 58,357,000 | 58,358,000 | 58,359,000 | 58,360,000 |
| 58,361,000 | 58,362,000 | 58,363,000 | 58,364,000 | 58,365,000 | 58,366,000 | 58,367,000 | 58,368,000 |
| 58,369,000 | 58,370,000 | 58,371,000 | 58,372,000 | 58,373,000 | 58,374,000 | 58,375,000 | 58,376,000 |
| 58,377,000 | 58,378,000 | 58,379,000 | 58,380,000 | 58,381,000 | 58,382,000 | 58,383,000 | 58,384,000 |
| 58,385,000 | 58,386,000 | 58,387,000 | 58,388,000 | 58,389,000 | 58,390,000 | 58,391,000 | 58,392,000 |
| 58,393,000 | 58,394,000 | 58,395,000 | 58,396,000 | 58,397,000 | 58,398,000 | 58,399,000 | 58,400,000 |
| 58,401,000 | 58,402,000 | 58,403,000 | 58,404,000 | 58,405,000 | 58,406,000 | 58,407,000 | 58,408,000 |
| 58,409,000 | 58,410,000 | 58,411,000 | 58,412,000 | 58,413,000 | 58,414,000 | 58,415,000 | 58,416,000 |
| 58,417,000 | 58,418,000 | 58,419,000 | 58,420,000 | 58,421,000 | 58,422,000 | 58,423,000 | 58,424,000 |
| 58,425,000 | 58,426,000 | 58,427,000 | 58,428,000 | 58,429,000 | 58,430,000 | 58,431,000 | 58,432,000 |
| 58,433,000 | 58,434,000 | 58,435,000 | 58,436,000 | 58,437,000 | 58,438,000 | 58,439,000 | 58,440,000 |

Supplemental Figure S8

|            |            |            |            |            |            |            |            |
|------------|------------|------------|------------|------------|------------|------------|------------|
| 58,441,000 | 58,442,000 | 58,443,000 | 58,444,000 | 58,445,000 | 58,446,000 | 58,447,000 | 58,448,000 |
| 58,449,000 | 58,450,000 | 58,451,000 | 58,452,000 | 58,453,000 | 58,454,000 | 58,455,000 | 58,456,000 |
| 58,457,000 | 58,458,000 | 58,459,000 | 58,460,000 | 58,461,000 | 58,462,000 | 58,463,000 | 58,464,000 |
| 58,465,000 | 58,466,000 | 58,467,000 | 58,468,000 | 58,469,000 | 58,470,000 | 58,471,000 | 58,472,000 |
| 58,473,000 | 58,474,000 | 58,475,000 | 58,476,000 | 58,477,000 | 58,478,000 | 58,479,000 | 58,480,000 |
| 58,481,000 | 58,482,000 | 58,483,000 | 58,484,000 | 58,485,000 | 58,486,000 | 58,487,000 | 58,488,000 |
| 58,489,000 | 58,490,000 | 58,491,000 | 58,492,000 | 58,493,000 | 58,494,000 | 58,495,000 | 58,496,000 |
| 58,497,000 | 58,498,000 | 58,499,000 | 58,500,000 | 58,501,000 | 58,502,000 | 58,503,000 | 58,504,000 |
| 58,505,000 | 58,506,000 | 58,507,000 | 58,508,000 | 58,509,000 | 58,510,000 | 58,511,000 | 58,512,000 |
| 58,513,000 | 58,514,000 | 58,515,000 | 58,516,000 | 58,517,000 | 58,518,000 | 58,519,000 | 58,520,000 |
| 58,521,000 | 58,522,000 | 58,523,000 | 58,524,000 | 58,525,000 | 58,526,000 | 58,527,000 | 58,528,000 |
| 58,529,000 | 58,530,000 | 58,531,000 | 58,532,000 | 58,533,000 | 58,534,000 | 58,535,000 | 58,536,000 |
| 58,537,000 | 58,538,000 | 58,539,000 | 58,540,000 | 58,541,000 | 58,542,000 | 58,543,000 | 58,544,000 |
| 58,545,000 | 58,546,000 | 58,547,000 | 58,548,000 | 58,549,000 | 58,550,000 | 58,551,000 | 58,552,000 |
| 58,553,000 | 58,554,000 | 58,555,000 | 58,556,000 | 58,557,000 | 58,558,000 | 58,559,000 | 58,560,000 |
| 58,561,000 | 58,562,000 | 58,563,000 | 58,564,000 | 58,565,000 | 58,566,000 | 58,567,000 | 58,568,000 |
| 58,569,000 | 58,570,000 | 58,571,000 | 58,572,000 | 58,573,000 | 58,574,000 | 58,575,000 | 58,576,000 |
| 58,577,000 | 58,578,000 | 58,579,000 | 58,580,000 | 58,581,000 | 58,582,000 | 58,583,000 | 58,584,000 |
| 58,585,000 | 58,586,000 | 58,587,000 | 58,588,000 | 58,589,000 | 58,590,000 | 58,591,000 | 58,592,000 |
| 58,593,000 | 58,594,000 | 58,595,000 | 58,596,000 | 58,597,000 | 58,598,000 | 58,599,000 | 58,600,000 |
| 58,601,000 | 58,602,000 | 58,603,000 | 58,604,000 | 58,605,000 | 58,606,000 | 58,607,000 | 58,608,000 |
| 58,609,000 | 58,610,000 | 58,611,000 | 58,612,000 | 58,613,000 | 58,614,000 | 58,615,000 | 58,616,000 |
| 58,617,000 | 58,618,000 | 58,619,000 | 58,620,000 | 58,621,000 | 58,622,000 | 58,623,000 | 58,624,000 |

Supplemental Figure S8

|            |            |            |            |            |            |            |            |
|------------|------------|------------|------------|------------|------------|------------|------------|
| 58,625,000 | 58,626,000 | 58,627,000 | 58,628,000 | 58,629,000 | 58,630,000 | 58,631,000 | 58,632,000 |
| 58,633,000 | 58,634,000 | 58,635,000 | 58,636,000 | 58,637,000 | 58,638,000 | 58,639,000 | 58,640,000 |
| 58,641,000 | 58,642,000 | 58,643,000 | 58,644,000 | 58,645,000 | 58,646,000 | 58,647,000 | 58,648,000 |
| 58,649,000 | 58,650,000 | 58,651,000 | 58,652,000 | 58,653,000 | 58,654,000 | 58,655,000 | 58,656,000 |
| 58,657,000 | 58,658,000 | 58,659,000 | 58,660,000 | 58,661,000 | 58,662,000 | 58,663,000 | 58,664,000 |
| 58,665,000 | 58,666,000 | 58,667,000 | 58,668,000 | 58,669,000 | 58,670,000 | 58,671,000 | 58,672,000 |
| 58,673,000 | 58,674,000 | 58,675,000 | 58,676,000 | 58,677,000 | 58,678,000 | 58,679,000 | 58,680,000 |
| 58,681,000 | 58,682,000 | 58,683,000 | 58,684,000 | 58,685,000 | 58,686,000 | 58,687,000 | 58,688,000 |
| 58,689,000 | 58,690,000 | 58,691,000 | 58,692,000 | 58,693,000 | 58,694,000 | 58,695,000 | 58,696,000 |
| 58,697,000 | 58,698,000 | 58,699,000 | 58,700,000 | 58,701,000 | 58,702,000 | 58,703,000 | 58,704,000 |
| 58,705,000 | 58,706,000 | 58,707,000 | 58,708,000 | 58,709,000 | 58,710,000 | 58,711,000 | 58,712,000 |
| 58,713,000 | 58,714,000 | 58,715,000 | 58,716,000 | 58,717,000 | 58,718,000 | 58,719,000 | 58,720,000 |
| 58,721,000 | 58,722,000 | 58,723,000 | 58,724,000 | 58,725,000 | 58,726,000 | 58,727,000 | 58,728,000 |
| 58,729,000 | 58,730,000 | 58,731,000 | 58,732,000 | 58,733,000 | 58,734,000 | 58,735,000 | 58,736,000 |
| 58,737,000 | 58,738,000 | 58,739,000 | 58,740,000 | 58,741,000 | 58,742,000 | 58,743,000 | 58,744,000 |
| 58,745,000 | 58,746,000 | 58,747,000 | 58,748,000 | 58,749,000 | 58,750,000 | 58,751,000 | 58,752,000 |
| 58,753,000 | 58,754,000 | 58,755,000 | 58,756,000 | 58,757,000 | 58,758,000 | 58,759,000 | 58,760,000 |
| 58,761,000 | 58,762,000 | 58,763,000 | 58,764,000 | 58,765,000 | 58,766,000 | 58,767,000 | 58,768,000 |
| 58,769,000 | 58,770,000 | 58,771,000 | 58,772,000 | 58,773,000 | 58,774,000 | 58,775,000 | 58,776,000 |
| 58,777,000 | 58,778,000 | 58,779,000 | 58,780,000 | 58,781,000 | 58,782,000 | 58,783,000 | 58,784,000 |
| 58,785,000 | 58,786,000 | 58,787,000 | 58,788,000 | 58,789,000 | 58,790,000 | 58,791,000 | 58,792,000 |
| 58,793,000 | 58,794,000 | 58,795,000 | 58,796,000 | 58,797,000 | 58,798,000 | 58,799,000 | 58,800,000 |
| 58,801,000 | 58,802,000 | 58,803,000 | 58,804,000 | 58,805,000 | 58,806,000 | 58,807,000 | 58,808,000 |

Supplemental Figure S8

|            |            |            |            |            |            |            |            |
|------------|------------|------------|------------|------------|------------|------------|------------|
| 58,809,000 | 58,810,000 | 58,811,000 | 58,812,000 | 58,813,000 | 58,814,000 | 58,815,000 | 58,816,000 |
| 58,817,000 | 58,818,000 | 58,819,000 | 58,820,000 | 58,821,000 | 58,822,000 | 58,823,000 | 58,824,000 |
| 58,825,000 | 58,826,000 | 58,827,000 | 58,828,000 | 58,829,000 | 58,830,000 | 58,831,000 | 58,832,000 |
| 58,833,000 | 58,834,000 | 58,835,000 | 58,836,000 | 58,837,000 | 58,838,000 | 58,839,000 | 58,840,000 |
| 58,841,000 | 58,842,000 | 58,843,000 | 58,844,000 | 58,845,000 | 58,846,000 | 58,847,000 | 58,848,000 |
| 58,849,000 | 58,850,000 | 58,851,000 | 58,852,000 | 58,853,000 | 58,854,000 | 58,855,000 | 58,856,000 |
| 58,857,000 | 58,858,000 | 58,859,000 | 58,860,000 | 58,861,000 | 58,862,000 | 58,863,000 | 58,864,000 |
| 58,865,000 | 58,866,000 | 58,867,000 | 58,868,000 | 58,869,000 | 58,870,000 | 58,871,000 | 58,872,000 |
| 58,873,000 | 58,874,000 | 58,875,000 | 58,876,000 | 58,877,000 | 58,878,000 | 58,879,000 | 58,880,000 |
| 58,881,000 | 58,882,000 | 58,883,000 | 58,884,000 | 58,885,000 | 58,886,000 | 58,887,000 | 58,888,000 |
| 58,889,000 | 58,890,000 | 58,891,000 | 58,892,000 | 58,893,000 | 58,894,000 | 58,895,000 | 58,896,000 |
| 58,897,000 | 58,898,000 | 58,899,000 | 58,900,000 | 58,901,000 | 58,902,000 | 58,903,000 | 58,904,000 |
| 58,905,000 | 58,906,000 | 58,907,000 | 58,908,000 | 58,909,000 | 58,910,000 | 58,911,000 | 58,912,000 |
| 58,913,000 | 58,914,000 | 58,915,000 | 58,916,000 | 58,917,000 | 58,918,000 | 58,919,000 | 58,920,000 |
| 58,921,000 | 58,922,000 | 58,923,000 | 58,924,000 | 58,925,000 | 58,926,000 | 58,927,000 | 58,928,000 |
| 58,929,000 | 58,930,000 | 58,931,000 | 58,932,000 | 58,933,000 | 58,934,000 | 58,935,000 | 58,936,000 |
| 58,937,000 | 58,938,000 | 58,939,000 | 58,940,000 | 58,941,000 | 58,942,000 | 58,943,000 | 58,944,000 |
| 58,945,000 | 58,946,000 | 58,947,000 | 58,948,000 | 58,949,000 | 58,950,000 | 58,951,000 | 58,952,000 |
| 58,953,000 | 58,954,000 | 58,955,000 | 58,956,000 | 58,957,000 | 58,958,000 | 58,959,000 | 58,960,000 |
| 58,961,000 | 58,962,000 | 58,963,000 | 58,964,000 | 58,965,000 | 58,966,000 | 58,967,000 | 58,968,000 |
| 58,969,000 | 58,970,000 | 58,971,000 | 58,972,000 | 58,973,000 | 58,974,000 | 58,975,000 | 58,976,000 |
| 58,977,000 | 58,978,000 | 58,979,000 | 58,980,000 | 58,981,000 | 58,982,000 | 58,983,000 | 58,984,000 |
| 58,985,000 | 58,986,000 | 58,987,000 | 58,988,000 | 58,989,000 | 58,990,000 | 58,991,000 | 58,992,000 |

NE

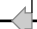

Supplemental Figure S8

|            |            |            |            |            |            |            |            |
|------------|------------|------------|------------|------------|------------|------------|------------|
| 58,993,000 | 58,994,000 | 58,995,000 | 58,996,000 | 58,997,000 | 58,998,000 | 58,999,000 | 59,000,000 |
| 59,001,000 | 59,002,000 | 59,003,000 | 59,004,000 | 59,005,000 | 59,006,000 | 59,007,000 | 59,008,000 |
| 59,009,000 | 59,010,000 | 59,011,000 | 59,012,000 | 59,013,000 | 59,014,000 | 59,015,000 | 59,016,000 |
| 59,017,000 | 59,018,000 | 59,019,000 | 59,020,000 | 59,021,000 | 59,022,000 | 59,023,000 | 59,024,000 |
| 59,025,000 | 59,026,000 | 59,027,000 | 59,028,000 | 59,029,000 | 59,030,000 | 59,031,000 | 59,032,000 |
| 59,033,000 | 59,034,000 | 59,035,000 | 59,036,000 | 59,037,000 | 59,038,000 | 59,039,000 | 59,040,000 |
| 59,041,000 | 59,042,000 | 59,043,000 | 59,044,000 | 59,045,000 | 59,046,000 | 59,047,000 | 59,048,000 |
| 59,049,000 | 59,050,000 | 59,051,000 | 59,052,000 | 59,053,000 | 59,054,000 | 59,055,000 | 59,056,000 |
| 59,057,000 | 59,058,000 | 59,059,000 | 59,060,000 | 59,061,000 | 59,062,000 | 59,063,000 | 59,064,000 |
| 59,065,000 | 59,066,000 | 59,067,000 | 59,068,000 | 59,069,000 | 59,070,000 | 59,071,000 | 59,072,000 |
| 59,073,000 | 59,074,000 | 59,075,000 | 59,076,000 | 59,077,000 | 59,078,000 | 59,079,000 | 59,080,000 |
| 59,081,000 | 59,082,000 | 59,083,000 | 59,084,000 | 59,085,000 | 59,086,000 | 59,087,000 | 59,088,000 |
| 59,089,000 | 59,090,000 | 59,091,000 | 59,092,000 | 59,093,000 | 59,094,000 | 59,095,000 | 59,096,000 |
| 59,097,000 | 59,098,000 | 59,099,000 | 59,100,000 | 59,101,000 | 59,102,000 | 59,103,000 | 59,104,000 |
| 59,105,000 | 59,106,000 | 59,107,000 | 59,108,000 | 59,109,000 | 59,110,000 | 59,111,000 | 59,112,000 |
| 59,113,000 | 59,114,000 | 59,115,000 | 59,116,000 | 59,117,000 | 59,118,000 | 59,119,000 | 59,120,000 |
| 59,121,000 | 59,122,000 | 59,123,000 | 59,124,000 | 59,125,000 | 59,126,000 | 59,127,000 | 59,128,000 |
| 59,129,000 | 59,130,000 | 59,131,000 | 59,132,000 | 59,133,000 | 59,134,000 | 59,135,000 | 59,136,000 |
| 59,137,000 | 59,138,000 | 59,139,000 | 59,140,000 | 59,141,000 | 59,142,000 | 59,143,000 | 59,144,000 |
| 59,145,000 | 59,146,000 | 59,147,000 | 59,148,000 | 59,149,000 | 59,150,000 | 59,151,000 | 59,152,000 |
| 59,153,000 | 59,154,000 | 59,155,000 | 59,156,000 | 59,157,000 | 59,158,000 | 59,159,000 | 59,160,000 |
| 59,161,000 | 59,162,000 | 59,163,000 | 59,164,000 | 59,165,000 | 59,166,000 | 59,167,000 | 59,168,000 |
| 59,169,000 | 59,170,000 | 59,171,000 | 59,172,000 | 59,173,000 | 59,174,000 | 59,175,000 | 59,176,000 |

Supplemental Figure S8

|            |            |            |            |            |            |            |            |
|------------|------------|------------|------------|------------|------------|------------|------------|
| 59,177,000 | 59,178,000 | 59,179,000 | 59,180,000 | 59,181,000 | 59,182,000 | 59,183,000 | 59,184,000 |
| 59,185,000 | 59,186,000 | 59,187,000 | 59,188,000 | 59,189,000 | 59,190,000 | 59,191,000 | 59,192,000 |
| 59,193,000 | 59,194,000 | 59,195,000 | 59,196,000 | 59,197,000 | 59,198,000 | 59,199,000 | 59,200,000 |
| 59,201,000 | 59,202,000 | 59,203,000 | 59,204,000 | 59,205,000 | 59,206,000 | 59,207,000 | 59,208,000 |
| 59,209,000 | 59,210,000 | 59,211,000 | 59,212,000 | 59,213,000 | 59,214,000 | 59,215,000 | 59,216,000 |
| 59,217,000 | 59,218,000 | 59,219,000 | 59,220,000 | 59,221,000 | 59,222,000 | 59,223,000 | 59,224,000 |
| 59,225,000 | 59,226,000 | 59,227,000 | 59,228,000 | 59,229,000 | 59,230,000 | 59,231,000 | 59,232,000 |
| 59,233,000 | 59,234,000 | 59,235,000 | 59,236,000 | 59,237,000 | 59,238,000 | 59,239,000 | 59,240,000 |
| 59,241,000 | 59,242,000 | 59,243,000 | 59,244,000 | 59,245,000 | 59,246,000 | 59,247,000 | 59,248,000 |
| 59,249,000 | 59,250,000 | 59,251,000 | 59,252,000 | 59,253,000 | 59,254,000 | 59,255,000 | 59,256,000 |
| 59,257,000 | 59,258,000 | 59,259,000 | 59,260,000 | 59,261,000 | 59,262,000 | 59,263,000 | 59,264,000 |
| 59,265,000 | 59,266,000 | 59,267,000 | 59,268,000 | 59,269,000 | 59,270,000 | 59,271,000 | 59,272,000 |
| 59,273,000 | 59,274,000 | 59,275,000 | 59,276,000 | 59,277,000 | 59,278,000 | 59,279,000 | 59,280,000 |
| 59,281,000 | 59,282,000 | 59,283,000 | 59,284,000 | 59,285,000 | 59,286,000 | 59,287,000 | 59,288,000 |
| 59,289,000 | 59,290,000 | 59,291,000 | 59,292,000 | 59,293,000 | 59,294,000 | 59,295,000 | 59,296,000 |
| 59,297,000 | 59,298,000 | 59,299,000 | 59,300,000 | 59,301,000 | 59,302,000 | 59,303,000 | 59,304,000 |
| 59,305,000 | 59,306,000 | 59,307,000 | 59,308,000 | 59,309,000 | 59,310,000 | 59,311,000 | 59,312,000 |
| 59,313,000 | 59,314,000 | 59,315,000 | 59,316,000 | 59,317,000 | 59,318,000 | 59,319,000 | 59,320,000 |
| 59,321,000 | 59,322,000 | 59,323,000 | 59,324,000 | 59,325,000 | 59,326,000 | 59,327,000 | 59,328,000 |
| 59,329,000 | 59,330,000 | 59,331,000 | 59,332,000 | 59,333,000 | 59,334,000 | 59,335,000 | 59,336,000 |
| 59,337,000 | 59,338,000 | 59,339,000 | 59,340,000 | 59,341,000 | 59,342,000 | 59,343,000 | 59,344,000 |
| 59,345,000 | 59,346,000 | 59,347,000 | 59,348,000 | 59,349,000 | 59,350,000 | 59,351,000 | 59,352,000 |
| 59,353,000 | 59,354,000 | 59,355,000 | 59,356,000 | 59,357,000 | 59,358,000 | 59,359,000 | 59,360,000 |



Supplemental Figure S8

|            |            |            |            |            |            |            |            |
|------------|------------|------------|------------|------------|------------|------------|------------|
| 59,361,000 | 59,362,000 | 59,363,000 | 59,364,000 | 59,365,000 | 59,366,000 | 59,367,000 | 59,368,000 |
| 59,369,000 | 59,370,000 | 59,371,000 | 59,372,000 | 59,373,000 | 59,374,000 | 59,375,000 | 59,376,000 |
| 59,377,000 | 59,378,000 | 59,379,000 | 59,380,000 | 59,381,000 | 59,382,000 | 59,383,000 | 59,384,000 |
| 59,385,000 | 59,386,000 | 59,387,000 | 59,388,000 | 59,389,000 | 59,390,000 | 59,391,000 | 59,392,000 |
| 59,393,000 | 59,394,000 | 59,395,000 | 59,396,000 | 59,397,000 | 59,398,000 | 59,399,000 | 59,400,000 |
| 59,401,000 | 59,402,000 | 59,403,000 | 59,404,000 | 59,405,000 | 59,406,000 | 59,407,000 | 59,408,000 |
| 59,409,000 | 59,410,000 | 59,411,000 | 59,412,000 | 59,413,000 | 59,414,000 | 59,415,000 | 59,416,000 |
| 59,417,000 | 59,418,000 | 59,419,000 | 59,420,000 | 59,421,000 | 59,422,000 | 59,423,000 | 59,424,000 |
| 59,425,000 | 59,426,000 | 59,427,000 | 59,428,000 | 59,429,000 | 59,430,000 | 59,431,000 | 59,432,000 |
| 59,433,000 | 59,434,000 | 59,435,000 | 59,436,000 | 59,437,000 | 59,438,000 | 59,439,000 | 59,440,000 |
| 59,441,000 | 59,442,000 | 59,443,000 | 59,444,000 | 59,445,000 | 59,446,000 | 59,447,000 | 59,448,000 |
| 59,449,000 | 59,450,000 | 59,451,000 | 59,452,000 | 59,453,000 | 59,454,000 | 59,455,000 | 59,456,000 |
| 59,457,000 | 59,458,000 | 59,459,000 | 59,460,000 | 59,461,000 | 59,462,000 | 59,463,000 | 59,464,000 |
| 59,465,000 | 59,466,000 | 59,467,000 | 59,468,000 | 59,469,000 | 59,470,000 | 59,471,000 | 59,472,000 |
| 59,473,000 | 59,474,000 | 59,475,000 | 59,476,000 | 59,477,000 | 59,478,000 | 59,479,000 | 59,480,000 |
| 59,481,000 | 59,482,000 | 59,483,000 | 59,484,000 | 59,485,000 | 59,486,000 | 59,487,000 | 59,488,000 |
| 59,489,000 | 59,490,000 | 59,491,000 | 59,492,000 | 59,493,000 | 59,494,000 | 59,495,000 | 59,496,000 |
| 59,497,000 | 59,498,000 | 59,499,000 | 59,500,000 | 59,501,000 | 59,502,000 | 59,503,000 | 59,504,000 |
| 59,505,000 | 59,506,000 | 59,507,000 | 59,508,000 | 59,509,000 | 59,510,000 | 59,511,000 | 59,512,000 |
| 59,513,000 | 59,514,000 | 59,515,000 | 59,516,000 | 59,517,000 | 59,518,000 | 59,519,000 | 59,520,000 |
| 59,521,000 | 59,522,000 | 59,523,000 | 59,524,000 | 59,525,000 | 59,526,000 | 59,527,000 | 59,528,000 |
| 59,529,000 | 59,530,000 | 59,531,000 | 59,532,000 | 59,533,000 | 59,534,000 | 59,535,000 | 59,536,000 |
| 59,537,000 | 59,538,000 | 59,539,000 | 59,540,000 | 59,541,000 | 59,542,000 | 59,543,000 | 59,544,000 |

Supplemental Figure S8

|            |            |            |            |            |            |            |            |
|------------|------------|------------|------------|------------|------------|------------|------------|
| 59,545,000 | 59,546,000 | 59,547,000 | 59,548,000 | 59,549,000 | 59,550,000 | 59,551,000 | 59,552,000 |
| 59,553,000 | 59,554,000 | 59,555,000 | 59,556,000 | 59,557,000 | 59,558,000 | 59,559,000 | 59,560,000 |
| 59,561,000 | 59,562,000 | 59,563,000 | 59,564,000 | 59,565,000 | 59,566,000 | 59,567,000 | 59,568,000 |
| 59,569,000 | 59,570,000 | 59,571,000 | 59,572,000 | 59,573,000 | 59,574,000 | 59,575,000 | 59,576,000 |
| 59,577,000 | 59,578,000 | 59,579,000 | 59,580,000 | 59,581,000 | 59,582,000 | 59,583,000 | 59,584,000 |
| 59,585,000 | 59,586,000 | 59,587,000 | 59,588,000 | 59,589,000 | 59,590,000 | 59,591,000 | 59,592,000 |
| 59,593,000 | 59,594,000 | 59,595,000 | 59,596,000 | 59,597,000 | 59,598,000 | 59,599,000 | 59,600,000 |
| 59,601,000 | 59,602,000 | 59,603,000 | 59,604,000 | 59,605,000 | 59,606,000 | 59,607,000 | 59,608,000 |
| 59,609,000 | 59,610,000 | 59,611,000 | 59,612,000 | 59,613,000 | 59,614,000 | 59,615,000 | 59,616,000 |
| 59,617,000 | 59,618,000 | 59,619,000 | 59,620,000 | 59,621,000 | 59,622,000 | 59,623,000 | 59,624,000 |
| 59,625,000 | 59,626,000 | 59,627,000 | 59,628,000 | 59,629,000 | 59,630,000 | 59,631,000 | 59,632,000 |
| 59,633,000 | 59,634,000 | 59,635,000 | 59,636,000 | 59,637,000 | 59,638,000 | 59,639,000 | 59,640,000 |
| 59,641,000 | 59,642,000 | 59,643,000 | 59,644,000 | 59,645,000 | 59,646,000 | 59,647,000 | 59,648,000 |
| 59,649,000 | 59,650,000 | 59,651,000 | 59,652,000 | 59,653,000 | 59,654,000 | 59,655,000 | 59,656,000 |
| 59,657,000 | 59,658,000 | 59,659,000 | 59,660,000 | 59,661,000 | 59,662,000 | 59,663,000 | 59,664,000 |
| 59,665,000 | 59,666,000 | 59,667,000 | 59,668,000 | 59,669,000 | 59,670,000 | 59,671,000 | 59,672,000 |
| 59,673,000 | 59,674,000 | 59,675,000 | 59,676,000 | 59,677,000 | 59,678,000 | 59,679,000 | 59,680,000 |
| 59,681,000 | 59,682,000 | 59,683,000 | 59,684,000 | 59,685,000 | 59,686,000 | 59,687,000 | 59,688,000 |
| 59,689,000 | 59,690,000 | 59,691,000 | 59,692,000 | 59,693,000 | 59,694,000 | 59,695,000 | 59,696,000 |
| 59,697,000 | 59,698,000 | 59,699,000 | 59,700,000 | 59,701,000 | 59,702,000 | 59,703,000 | 59,704,000 |
| 59,705,000 | 59,706,000 | 59,707,000 | 59,708,000 | 59,709,000 | 59,710,000 | 59,711,000 | 59,712,000 |
| 59,713,000 | 59,714,000 | 59,715,000 | 59,716,000 | 59,717,000 | 59,718,000 | 59,719,000 | 59,720,000 |
| 59,721,000 | 59,722,000 | 59,723,000 | 59,724,000 | 59,725,000 | 59,726,000 | 59,727,000 | 59,728,000 |

Supplemental Figure S8

|            |            |            |            |            |            |            |            |
|------------|------------|------------|------------|------------|------------|------------|------------|
| 59,729,000 | 59,730,000 | 59,731,000 | 59,732,000 | 59,733,000 | 59,734,000 | 59,735,000 | 59,736,000 |
| 59,737,000 | 59,738,000 | 59,739,000 | 59,740,000 | 59,741,000 | 59,742,000 | 59,743,000 | 59,744,000 |
| 59,745,000 | 59,746,000 | 59,747,000 | 59,748,000 | 59,749,000 | 59,750,000 | 59,751,000 | 59,752,000 |
| 59,753,000 | 59,754,000 | 59,755,000 | 59,756,000 | 59,757,000 | 59,758,000 | 59,759,000 | 59,760,000 |
| 59,761,000 | 59,762,000 | 59,763,000 | 59,764,000 | 59,765,000 | 59,766,000 | 59,767,000 | 59,768,000 |
| 59,769,000 | 59,770,000 | 59,771,000 | 59,772,000 | 59,773,000 | 59,774,000 | 59,775,000 | 59,776,000 |
| 59,777,000 | 59,778,000 | 59,779,000 | 59,780,000 | 59,781,000 | 59,782,000 | 59,783,000 | 59,784,000 |
| 59,785,000 | 59,786,000 | 59,787,000 | 59,788,000 | 59,789,000 | 59,790,000 | 59,791,000 | 59,792,000 |
| 59,793,000 | 59,794,000 | 59,795,000 | 59,796,000 | 59,797,000 | 59,798,000 | 59,799,000 | 59,800,000 |
| 59,801,000 | 59,802,000 | 59,803,000 | 59,804,000 | 59,805,000 | 59,806,000 | 59,807,000 | 59,808,000 |
| 59,809,000 | 59,810,000 | 59,811,000 | 59,812,000 | 59,813,000 | 59,814,000 | 59,815,000 | 59,816,000 |
| 59,817,000 | 59,818,000 | 59,819,000 | 59,820,000 | 59,821,000 | 59,822,000 | 59,823,000 | 59,824,000 |
| 59,825,000 | 59,826,000 | 59,827,000 | 59,828,000 | 59,829,000 | 59,830,000 | 59,831,000 | 59,832,000 |
| 59,833,000 | 59,834,000 | 59,835,000 | 59,836,000 | 59,837,000 | 59,838,000 | 59,839,000 | 59,840,000 |
| 59,841,000 | 59,842,000 | 59,843,000 | 59,844,000 | 59,845,000 | 59,846,000 | 59,847,000 | 59,848,000 |
| 59,849,000 | 59,850,000 | 59,851,000 | 59,852,000 | 59,853,000 | 59,854,000 | 59,855,000 | 59,856,000 |
| 59,857,000 | 59,858,000 | 59,859,000 | 59,860,000 | 59,861,000 | 59,862,000 | 59,863,000 | 59,864,000 |
| 59,865,000 | 59,866,000 | 59,867,000 | 59,868,000 | 59,869,000 | 59,870,000 | 59,871,000 | 59,872,000 |
| 59,873,000 | 59,874,000 | 59,875,000 | 59,876,000 | 59,877,000 | 59,878,000 | 59,879,000 | 59,880,000 |
| 59,881,000 | 59,882,000 | 59,883,000 | 59,884,000 | 59,885,000 | 59,886,000 | 59,887,000 | 59,888,000 |
| 59,889,000 | 59,890,000 | 59,891,000 | 59,892,000 | 59,893,000 | 59,894,000 | 59,895,000 | 59,896,000 |
| 59,897,000 | 59,898,000 | 59,899,000 | 59,900,000 | 59,901,000 | 59,902,000 | 59,903,000 | 59,904,000 |
| 59,905,000 | 59,906,000 | 59,907,000 | 59,908,000 | 59,909,000 | 59,910,000 | 59,911,000 | 59,912,000 |

Supplemental Figure S8

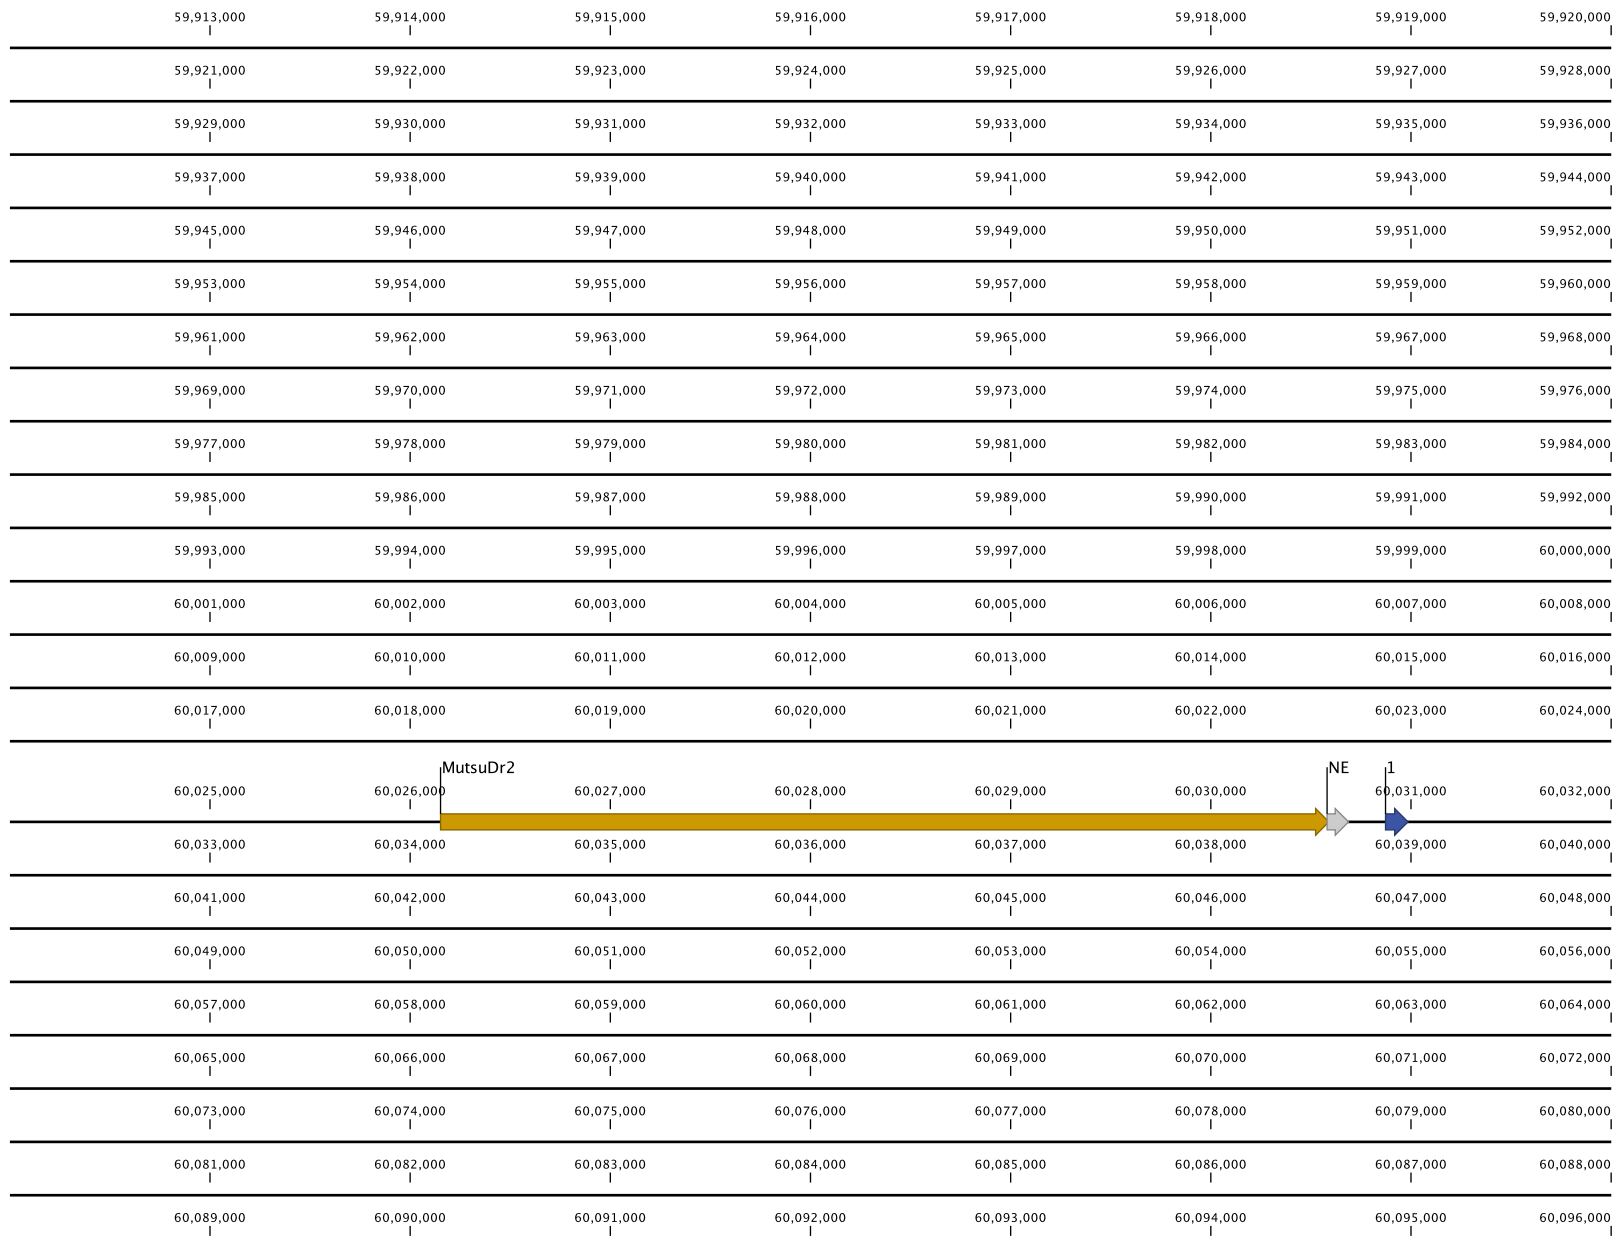

Supplemental Figure S8

|            |            |            |            |            |            |            |            |
|------------|------------|------------|------------|------------|------------|------------|------------|
| 60,097,000 | 60,098,000 | 60,099,000 | 60,100,000 | 60,101,000 | 60,102,000 | 60,103,000 | 60,104,000 |
| 60,105,000 | 60,106,000 | 60,107,000 | 60,108,000 | 60,109,000 | 60,110,000 | 60,111,000 | 60,112,000 |
| 60,113,000 | 60,114,000 | 60,115,000 | 60,116,000 | 60,117,000 | 60,118,000 | 60,119,000 | 60,120,000 |
| 60,121,000 | 60,122,000 | 60,123,000 | 60,124,000 | 60,125,000 | 60,126,000 | 60,127,000 | 60,128,000 |
| 60,129,000 | 60,130,000 | 60,131,000 | 60,132,000 | 60,133,000 | 60,134,000 | 60,135,000 | 60,136,000 |
| 60,137,000 | 60,138,000 | 60,139,000 | 60,140,000 | 60,141,000 | 60,142,000 | 60,143,000 | 60,144,000 |
| 60,145,000 | 60,146,000 | 60,147,000 | 60,148,000 | 60,149,000 | 60,150,000 | 60,151,000 | 60,152,000 |
| 60,153,000 | 60,154,000 | 60,155,000 | 60,156,000 | 60,157,000 | 60,158,000 | 60,159,000 | 60,160,000 |
| 60,161,000 | 60,162,000 | 60,163,000 | 60,164,000 | 60,165,000 | 60,166,000 | 60,167,000 | 60,168,000 |
| 60,169,000 | 60,170,000 | 60,171,000 | 60,172,000 | 60,173,000 | 60,174,000 | 60,175,000 | 60,176,000 |
| 60,177,000 | 60,178,000 | 60,179,000 | 60,180,000 | 60,181,000 | 60,182,000 | 60,183,000 | 60,184,000 |
| 60,185,000 | 60,186,000 | 60,187,000 | 60,188,000 | 60,189,000 | 60,190,000 | 60,191,000 | 60,192,000 |
| 60,193,000 | 60,194,000 | 60,195,000 | 60,196,000 | 60,197,000 | 60,198,000 | 60,199,000 | 60,200,000 |
| 60,201,000 | 60,202,000 | 60,203,000 | 60,204,000 | 60,205,000 | 60,206,000 | 60,207,000 | 60,208,000 |
| 60,209,000 | 60,210,000 | 60,211,000 | 60,212,000 | 60,213,000 | 60,214,000 | 60,215,000 | 60,216,000 |
| 60,217,000 | 60,218,000 | 60,219,000 | 60,220,000 | 60,221,000 | 60,222,000 | 60,223,000 | 60,224,000 |
| 60,225,000 | 60,226,000 | 60,227,000 | 60,228,000 | 60,229,000 | 60,230,000 | 60,231,000 | 60,232,000 |
| 60,233,000 | 60,234,000 | 60,235,000 | 60,236,000 | 60,237,000 | 60,238,000 | 60,239,000 | 60,240,000 |
| 60,241,000 | 60,242,000 | 60,243,000 | 60,244,000 | 60,245,000 | 60,246,000 | 60,247,000 | 60,248,000 |
| 60,249,000 | 60,250,000 | 60,251,000 | 60,252,000 | 60,253,000 | 60,254,000 | 60,255,000 | 60,256,000 |
| 60,257,000 | 60,258,000 | 60,259,000 | 60,260,000 | 60,261,000 | 60,262,000 | 60,263,000 | 60,264,000 |
| 60,265,000 | 60,266,000 | 60,267,000 | 60,268,000 | 60,269,000 | 60,270,000 | 60,271,000 | 60,272,000 |
| 60,273,000 | 60,274,000 | 60,275,000 | 60,276,000 | 60,277,000 | 60,278,000 | 60,279,000 | 60,280,000 |

Supplemental Figure S8

|            |            |            |            |            |            |            |            |
|------------|------------|------------|------------|------------|------------|------------|------------|
| 60,281,000 | 60,282,000 | 60,283,000 | 60,284,000 | 60,285,000 | 60,286,000 | 60,287,000 | 60,288,000 |
| 60,289,000 | 60,290,000 | 60,291,000 | 60,292,000 | 60,293,000 | 60,294,000 | 60,295,000 | 60,296,000 |
| 60,297,000 | 60,298,000 | 60,299,000 | 60,300,000 | 60,301,000 | 60,302,000 | 60,303,000 | 60,304,000 |
| 60,305,000 | 60,306,000 | 60,307,000 | 60,308,000 | 60,309,000 | 60,310,000 | 60,311,000 | 60,312,000 |
| 60,313,000 | 60,314,000 | 60,315,000 | 60,316,000 | 60,317,000 | 60,318,000 | 60,319,000 | 60,320,000 |
| 60,321,000 | 60,322,000 | 60,323,000 | 60,324,000 | 60,325,000 | 60,326,000 | 60,327,000 | 60,328,000 |
| 60,329,000 | 60,330,000 | 60,331,000 | 60,332,000 | 60,333,000 | 60,334,000 | 60,335,000 | 60,336,000 |
| 60,337,000 | 60,338,000 | 60,339,000 | 60,340,000 | 60,341,000 | 60,342,000 | 60,343,000 | 60,344,000 |
| 60,345,000 | 60,346,000 | 60,347,000 | 60,348,000 | 60,349,000 | 60,350,000 | 60,351,000 | 60,352,000 |
| 60,353,000 | 60,354,000 | 60,355,000 | 60,356,000 | 60,357,000 | 60,358,000 | 60,359,000 | 60,360,000 |
| 60,361,000 | 60,362,000 | 60,363,000 | 60,364,000 | 60,365,000 | 60,366,000 | 60,367,000 | 60,368,000 |
| 60,369,000 | 60,370,000 | 60,371,000 | 60,372,000 | 60,373,000 | 60,374,000 | 60,375,000 | 60,376,000 |
| 60,377,000 | 60,378,000 | 60,379,000 | 60,380,000 | 60,381,000 | 60,382,000 | 60,383,000 | 60,384,000 |
| 60,385,000 | 60,386,000 | 60,387,000 | 60,388,000 | 60,389,000 | 60,390,000 | 60,391,000 | 60,392,000 |
| 60,393,000 | 60,394,000 | 60,395,000 | 60,396,000 | 60,397,000 | 60,398,000 | 60,399,000 | 60,400,000 |
| 60,401,000 | 60,402,000 | 60,403,000 | 60,404,000 | 60,405,000 | 60,406,000 | 60,407,000 | 60,408,000 |
| 60,409,000 | 60,410,000 | 60,411,000 | 60,412,000 | 60,413,000 | 60,414,000 | 60,415,000 | 60,416,000 |
| 60,417,000 | 60,418,000 | 60,419,000 | 60,420,000 | 60,421,000 | 60,422,000 | 60,423,000 | 60,424,000 |
| 60,425,000 | 60,426,000 | 60,427,000 | 60,428,000 | 60,429,000 | 60,430,000 | 60,431,000 | 60,432,000 |
| 60,433,000 | 60,434,000 | 60,435,000 | 60,436,000 | 60,437,000 | 60,438,000 | 60,439,000 | 60,440,000 |
| 60,441,000 | 60,442,000 | 60,443,000 | 60,444,000 | 60,445,000 | 60,446,000 | 60,447,000 | 60,448,000 |
| 60,449,000 | 60,450,000 | 60,451,000 | 60,452,000 | 60,453,000 | 60,454,000 | 60,455,000 | 60,456,000 |
| 60,457,000 | 60,458,000 | 60,459,000 | 60,460,000 | 60,461,000 | 60,462,000 | 60,463,000 | 60,464,000 |

NE

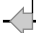

Supplemental Figure S8

|            |            |            |            |            |            |            |            |
|------------|------------|------------|------------|------------|------------|------------|------------|
| 60,465,000 | 60,466,000 | 60,467,000 | 60,468,000 | 60,469,000 | 60,470,000 | 60,471,000 | 60,472,000 |
| 60,473,000 | 60,474,000 | 60,475,000 | 60,476,000 | 60,477,000 | 60,478,000 | 60,479,000 | 60,480,000 |
| 60,481,000 | 60,482,000 | 60,483,000 | 60,484,000 | 60,485,000 | 60,486,000 | 60,487,000 | 60,488,000 |
| 60,489,000 | 60,490,000 | 60,491,000 | 60,492,000 | 60,493,000 | 60,494,000 | 60,495,000 | 60,496,000 |
| 60,497,000 | 60,498,000 | 60,499,000 | 60,500,000 | 60,501,000 | 60,502,000 | 60,503,000 | 60,504,000 |
| 60,505,000 | 60,506,000 | 60,507,000 | 60,508,000 | 60,509,000 | 60,510,000 | 60,511,000 | 60,512,000 |
| 60,513,000 | 60,514,000 | 60,515,000 | 60,516,000 | 60,517,000 | 60,518,000 | 60,519,000 | 60,520,000 |
| 60,521,000 | 60,522,000 | 60,523,000 | 60,524,000 | 60,525,000 | 60,526,000 | 60,527,000 | 60,528,000 |
| 60,529,000 | 60,530,000 | 60,531,000 | 60,532,000 | 60,533,000 | 60,534,000 | 60,535,000 | 60,536,000 |
| 60,537,000 | 60,538,000 | 60,539,000 | 60,540,000 | 60,541,000 | 60,542,000 | 60,543,000 | 60,544,000 |
| 60,545,000 | 60,546,000 | 60,547,000 | 60,548,000 | 60,549,000 | 60,550,000 | 60,551,000 | 60,552,000 |
| 60,553,000 | 60,554,000 | 60,555,000 | 60,556,000 | 60,557,000 | 60,558,000 | 60,559,000 | 60,560,000 |
| 60,561,000 | 60,562,000 | 60,563,000 | 60,564,000 | 60,565,000 | 60,566,000 | 60,567,000 | 60,568,000 |
| 60,569,000 | 60,570,000 | 60,571,000 | 60,572,000 | 60,573,000 | 60,574,000 | 60,575,000 | 60,576,000 |
| 60,577,000 | 60,578,000 | 60,579,000 | 60,580,000 | 60,581,000 | 60,582,000 | 60,583,000 | 60,584,000 |
| 60,585,000 | 60,586,000 | 60,587,000 | 60,588,000 | 60,589,000 | 60,590,000 | 60,591,000 | 60,592,000 |
| 60,593,000 | 60,594,000 | 60,595,000 | 60,596,000 | 60,597,000 | 60,598,000 | 60,599,000 | 60,600,000 |
| 60,601,000 | 60,602,000 | 60,603,000 | 60,604,000 | 60,605,000 | 60,606,000 | 60,607,000 | 60,608,000 |
| 60,609,000 | 60,610,000 | 60,611,000 | 60,612,000 | 60,613,000 | 60,614,000 | 60,615,000 | 60,616,000 |
| 60,617,000 | 60,618,000 | 60,619,000 | 60,620,000 | 60,621,000 | 60,622,000 | 60,623,000 | 60,624,000 |
| 60,625,000 | 60,626,000 | 60,627,000 | 60,628,000 | 60,629,000 | 60,630,000 | 60,631,000 | 60,632,000 |
| 60,633,000 | 60,634,000 | 60,635,000 | 60,636,000 | 60,637,000 | 60,638,000 | 60,639,000 | 60,640,000 |
| 60,641,000 | 60,642,000 | 60,643,000 | 60,644,000 | 60,645,000 | 60,646,000 | 60,647,000 | 60,648,000 |

Supplemental Figure S8

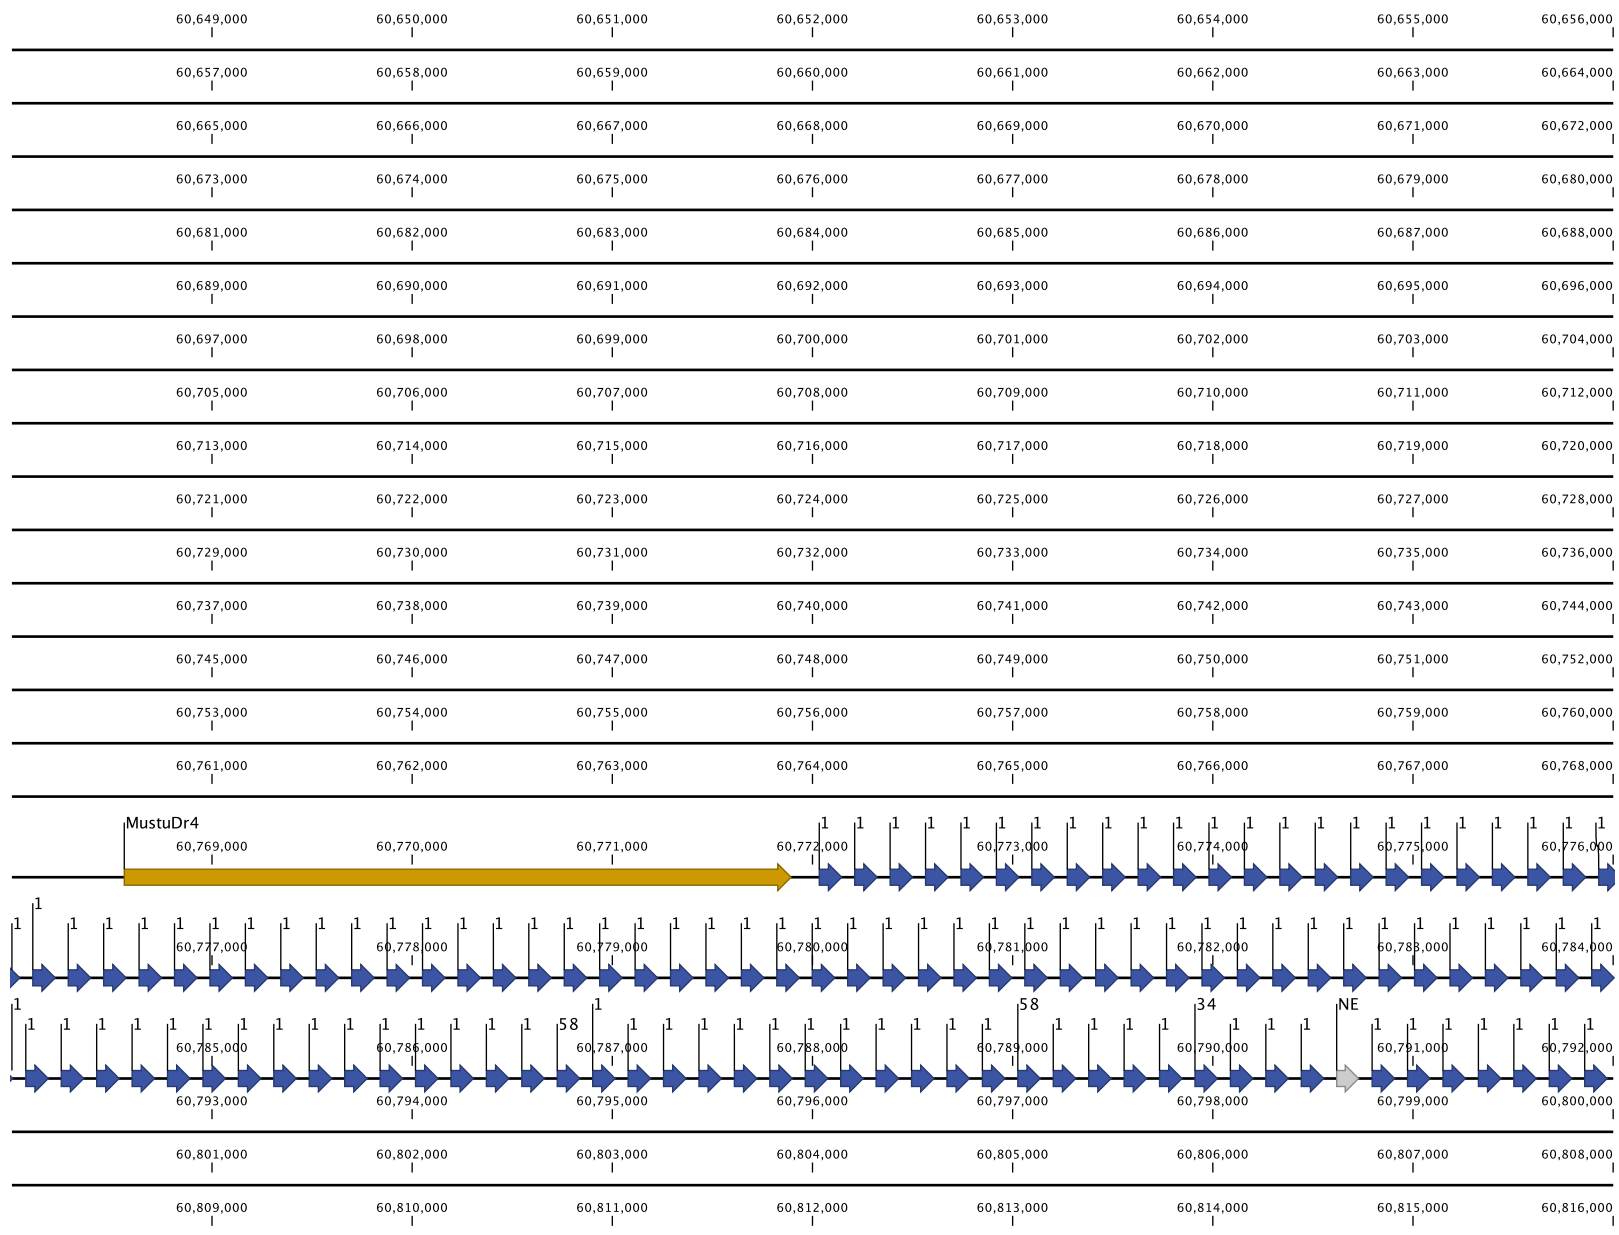



Supplemental Figure S8

|            |            |            |            |            |            |            |            |
|------------|------------|------------|------------|------------|------------|------------|------------|
| 60,817,000 | 60,818,000 | 60,819,000 | 60,820,000 | 60,821,000 | 60,822,000 | 60,823,000 | 60,824,000 |
| 60,825,000 | 60,826,000 | 60,827,000 | 60,828,000 | 60,829,000 | 60,830,000 | 60,831,000 | 60,832,000 |
| 60,833,000 | 60,834,000 | 60,835,000 | 60,836,000 | 60,837,000 | 60,838,000 | 60,839,000 | 60,840,000 |
| 60,841,000 | 60,842,000 | 60,843,000 | 60,844,000 | 60,845,000 | 60,846,000 | 60,847,000 | 60,848,000 |
| 60,849,000 | 60,850,000 | 60,851,000 | 60,852,000 | 60,853,000 | 60,854,000 | 60,855,000 | 60,856,000 |
| 60,857,000 | 60,858,000 | 60,859,000 | 60,860,000 | 60,861,000 | 60,862,000 | 60,863,000 | 60,864,000 |
| 60,865,000 | 60,866,000 | 60,867,000 | 60,868,000 | 60,869,000 | 60,870,000 | 60,871,000 | 60,872,000 |
| 60,873,000 | 60,874,000 | 60,875,000 | 60,876,000 | 60,877,000 | 60,878,000 | 60,879,000 | 60,880,000 |
| 60,881,000 | 60,882,000 | 60,883,000 | 60,884,000 | 60,885,000 | 60,886,000 | 60,887,000 | 60,888,000 |
| 60,889,000 | 60,890,000 | 60,891,000 | 60,892,000 | 60,893,000 | 60,894,000 | 60,895,000 | 60,896,000 |
| 60,897,000 | 60,898,000 | 60,899,000 | 60,900,000 | 60,901,000 | 60,902,000 | 60,903,000 | 60,904,000 |
| 60,905,000 | 60,906,000 | 60,907,000 | 60,908,000 | 60,909,000 | 60,910,000 | 60,911,000 | 60,912,000 |
| 60,913,000 | 60,914,000 | 60,915,000 | 60,916,000 | 60,917,000 | 60,918,000 | 60,919,000 | 60,920,000 |
| 60,921,000 | 60,922,000 | 60,923,000 | 60,924,000 | 60,925,000 | 60,926,000 | 60,927,000 | 60,928,000 |
| 60,929,000 | 60,930,000 | 60,931,000 | 60,932,000 | 60,933,000 | 60,934,000 | 60,935,000 | 60,936,000 |
| 60,937,000 | 60,938,000 | 60,939,000 | 60,940,000 | 60,941,000 | 60,942,000 | 60,943,000 | 60,944,000 |
| 60,945,000 | 60,946,000 | 60,947,000 | 60,948,000 | 60,949,000 | 60,950,000 | 60,951,000 | 60,952,000 |
| 60,953,000 | 60,954,000 | 60,955,000 | 60,956,000 | 60,957,000 | 60,958,000 | 60,959,000 | 60,960,000 |
| 60,961,000 | 60,962,000 | 60,963,000 | 60,964,000 | 60,965,000 | 60,966,000 | 60,967,000 | 60,968,000 |
| 60,969,000 | 60,970,000 | 60,971,000 | 60,972,000 | 60,973,000 | 60,974,000 | 60,975,000 | 60,976,000 |
| 60,977,000 | 60,978,000 | 60,979,000 | 60,980,000 | 60,981,000 | 60,982,000 | 60,983,000 | 60,984,000 |
| 60,985,000 | 60,986,000 | 60,987,000 | 60,988,000 | 60,989,000 | 60,990,000 | 60,991,000 | 60,992,000 |
| 60,993,000 | 60,994,000 | 60,995,000 | 60,996,000 | 60,997,000 | 60,998,000 | 60,999,000 | 61,000,000 |

Supplemental Figure S8

|            |            |            |            |            |            |            |            |
|------------|------------|------------|------------|------------|------------|------------|------------|
| 61,001,000 | 61,002,000 | 61,003,000 | 61,004,000 | 61,005,000 | 61,006,000 | 61,007,000 | 61,008,000 |
| 61,009,000 | 61,010,000 | 61,011,000 | 61,012,000 | 61,013,000 | 61,014,000 | 61,015,000 | 61,016,000 |
| 61,017,000 | 61,018,000 | 61,019,000 | 61,020,000 | 61,021,000 | 61,022,000 | 61,023,000 | 61,024,000 |
| 61,025,000 | 61,026,000 | 61,027,000 | 61,028,000 | 61,029,000 | 61,030,000 | 61,031,000 | 61,032,000 |
| 61,033,000 | 61,034,000 | 61,035,000 | 61,036,000 | 61,037,000 | 61,038,000 | 61,039,000 | 61,040,000 |
| 61,041,000 | 61,042,000 | 61,043,000 | 61,044,000 | 61,045,000 | 61,046,000 | 61,047,000 | 61,048,000 |
| 61,049,000 | 61,050,000 | 61,051,000 | 61,052,000 | 61,053,000 | 61,054,000 | 61,055,000 | 61,056,000 |
| 61,057,000 | 61,058,000 | 61,059,000 | 61,060,000 | 61,061,000 | 61,062,000 | 61,063,000 | 61,064,000 |
| 61,065,000 | 61,066,000 | 61,067,000 | 61,068,000 | 61,069,000 | 61,070,000 | 61,071,000 | 61,072,000 |
| 61,073,000 | 61,074,000 | 61,075,000 | 61,076,000 | 61,077,000 | 61,078,000 | 61,079,000 | 61,080,000 |
| 61,081,000 | 61,082,000 | 61,083,000 | 61,084,000 | 61,085,000 | 61,086,000 | 61,087,000 | 61,088,000 |
| 61,089,000 | 61,090,000 | 61,091,000 | 61,092,000 | 61,093,000 | 61,094,000 | 61,095,000 | 61,096,000 |
| 61,097,000 | 61,098,000 | 61,099,000 | 61,100,000 | 61,101,000 | 61,102,000 | 61,103,000 | 61,104,000 |
| 61,105,000 | 61,106,000 | 61,107,000 | 61,108,000 | 61,109,000 | 61,110,000 | 61,111,000 | 61,112,000 |
| 61,113,000 | 61,114,000 | 61,115,000 | 61,116,000 | 61,117,000 | 61,118,000 | 61,119,000 | 61,120,000 |
| 61,121,000 | 61,122,000 | 61,123,000 | 61,124,000 | 61,125,000 | 61,126,000 | 61,127,000 | 61,128,000 |
| 61,129,000 | 61,130,000 | 61,131,000 | 61,132,000 | 61,133,000 | 61,134,000 | 61,135,000 | 61,136,000 |
| 61,137,000 | 61,138,000 | 61,139,000 | 61,140,000 | 61,141,000 | 61,142,000 | 61,143,000 | 61,144,000 |
| 61,145,000 | 61,146,000 | 61,147,000 | 61,148,000 | 61,149,000 | 61,150,000 | 61,151,000 | 61,152,000 |
| 61,153,000 | 61,154,000 | 61,155,000 | 61,156,000 | 61,157,000 | 61,158,000 | 61,159,000 | 61,160,000 |
| 61,161,000 | 61,162,000 | 61,163,000 | 61,164,000 | 61,165,000 | 61,166,000 | 61,167,000 | 61,168,000 |
| 61,169,000 | 61,170,000 | 61,171,000 | 61,172,000 | 61,173,000 | 61,174,000 | 61,175,000 | 61,176,000 |

Supplemental Figure S8

|            |            |            |            |            |            |            |            |
|------------|------------|------------|------------|------------|------------|------------|------------|
| 61,177,000 | 61,178,000 | 61,179,000 | 61,180,000 | 61,181,000 | 61,182,000 | 61,183,000 | 61,184,000 |
| 61,185,000 | 61,186,000 | 61,187,000 | 61,188,000 | 61,189,000 | 61,190,000 | 61,191,000 | 61,192,000 |
| 61,193,000 | 61,194,000 | 61,195,000 | 61,196,000 | 61,197,000 | 61,198,000 | 61,199,000 | 61,200,000 |
| 61,201,000 | 61,202,000 | 61,203,000 | 61,204,000 | 61,205,000 | 61,206,000 | 61,207,000 | 61,208,000 |
| 61,209,000 | 61,210,000 | 61,211,000 | 61,212,000 | 61,213,000 | 61,214,000 | 61,215,000 | 61,216,000 |
| 61,217,000 | 61,218,000 | 61,219,000 | 61,220,000 | 61,221,000 | 61,222,000 | 61,223,000 | 61,224,000 |
| 61,225,000 | 61,226,000 | 61,227,000 | 61,228,000 | 61,229,000 | 61,230,000 | 61,231,000 | 61,232,000 |
| 61,233,000 | 61,234,000 | 61,235,000 | 61,236,000 | 61,237,000 | 61,238,000 | 61,239,000 | 61,240,000 |
| 61,241,000 | 61,242,000 | 61,243,000 | 61,244,000 | 61,245,000 | 61,246,000 | 61,247,000 | 61,248,000 |
| 61,249,000 | 61,250,000 | 61,251,000 | 61,252,000 | 61,253,000 | 61,254,000 | 61,255,000 | 61,256,000 |
| 61,257,000 | 61,258,000 | 61,259,000 | 61,260,000 | 61,261,000 | 61,262,000 | 61,263,000 | 61,264,000 |
| 61,265,000 | 61,266,000 | 61,267,000 | 61,268,000 | 61,269,000 | 61,270,000 | 61,271,000 | 61,272,000 |
| 61,273,000 | 61,274,000 | 61,275,000 | 61,276,000 | 61,277,000 | 61,278,000 | 61,279,000 | 61,280,000 |
| 61,281,000 | 61,282,000 | 61,283,000 | 61,284,000 | 61,285,000 | 61,286,000 | 61,287,000 | 61,288,000 |
| 61,289,000 | 61,290,000 | 61,291,000 | 61,292,000 | 61,293,000 | 61,294,000 | 61,295,000 | 61,296,000 |
| 61,297,000 | 61,298,000 | 61,299,000 | 61,300,000 | 61,301,000 | 61,302,000 | 61,303,000 | 61,304,000 |
| 61,305,000 | 61,306,000 | 61,307,000 | 61,308,000 | 61,309,000 | 61,310,000 | 61,311,000 | 61,312,000 |
| 61,313,000 | 61,314,000 | 61,315,000 | 61,316,000 | 61,317,000 | 61,318,000 | 61,319,000 | 61,320,000 |
| 61,321,000 | 61,322,000 | 61,323,000 | 61,324,000 | 61,325,000 | 61,326,000 | 61,327,000 | 61,328,000 |
| 61,329,000 | 61,330,000 | 61,331,000 | 61,332,000 | 61,333,000 | 61,334,000 | 61,335,000 | 61,336,000 |
| 61,337,000 | 61,338,000 | 61,339,000 | 61,340,000 | 61,341,000 | 61,342,000 | 61,343,000 | 61,344,000 |
| 61,345,000 | 61,346,000 | 61,347,000 | 61,348,000 | 61,349,000 | 61,350,000 | 61,351,000 | 61,352,000 |
| 61,353,000 | 61,354,000 | 61,355,000 | 61,356,000 | 61,357,000 | 61,358,000 | 61,359,000 | 61,360,000 |

Supplemental Figure S8

|            |            |            |            |            |            |            |            |
|------------|------------|------------|------------|------------|------------|------------|------------|
| 61,361,000 | 61,362,000 | 61,363,000 | 61,364,000 | 61,365,000 | 61,366,000 | 61,367,000 | 61,368,000 |
| 61,369,000 | 61,370,000 | 61,371,000 | 61,372,000 | 61,373,000 | 61,374,000 | 61,375,000 | 61,376,000 |
| 61,377,000 | 61,378,000 | 61,379,000 | 61,380,000 | 61,381,000 | 61,382,000 | 61,383,000 | 61,384,000 |
| 61,385,000 | 61,386,000 | 61,387,000 | 61,388,000 | 61,389,000 | 61,390,000 | 61,391,000 | 61,392,000 |
| 61,393,000 | 61,394,000 | 61,395,000 | 61,396,000 | 61,397,000 | 61,398,000 | 61,399,000 | 61,400,000 |
| 61,401,000 | 61,402,000 | 61,403,000 | 61,404,000 | 61,405,000 | 61,406,000 | 61,407,000 | 61,408,000 |
| 61,409,000 | 61,410,000 | 61,411,000 | 61,412,000 | 61,413,000 | 61,414,000 | 61,415,000 | 61,416,000 |
| 61,417,000 | 61,418,000 | 61,419,000 | 61,420,000 | 61,421,000 | 61,422,000 | 61,423,000 | 61,424,000 |
| 61,425,000 | 61,426,000 | 61,427,000 | 61,428,000 | 61,429,000 | 61,430,000 | 61,431,000 | 61,432,000 |
| 61,433,000 | 61,434,000 | 61,435,000 | 61,436,000 | 61,437,000 | 61,438,000 | 61,439,000 | 61,440,000 |
| 61,441,000 | 61,442,000 | 61,443,000 | 61,444,000 | 61,445,000 | 61,446,000 | 61,447,000 | 61,448,000 |
| 61,449,000 | 61,450,000 | 61,451,000 | 61,452,000 | 61,453,000 | 61,454,000 | 61,455,000 | 61,456,000 |
| 61,457,000 | 61,458,000 | 61,459,000 | 61,460,000 | 61,461,000 | 61,462,000 | 61,463,000 | 61,464,000 |
| 61,465,000 | 61,466,000 | 61,467,000 | 61,468,000 | 61,469,000 | 61,470,000 | 61,471,000 | 61,472,000 |
| 61,473,000 | 61,474,000 | 61,475,000 | 61,476,000 | 61,477,000 | 61,478,000 | 61,479,000 | 61,480,000 |
| 61,481,000 | 61,482,000 | 61,483,000 | 61,484,000 | 61,485,000 | 61,486,000 | 61,487,000 | 61,488,000 |
| 61,489,000 | 61,490,000 | 61,491,000 | 61,492,000 | 61,493,000 | 61,494,000 | 61,495,000 | 61,496,000 |
| 61,497,000 | 61,498,000 | 61,499,000 | 61,500,000 | 61,501,000 | 61,502,000 | 61,503,000 | 61,504,000 |
| 61,505,000 | 61,506,000 | 61,507,000 | 61,508,000 | 61,509,000 | 61,510,000 | 61,511,000 | 61,512,000 |
| 61,513,000 | 61,514,000 | 61,515,000 | 61,516,000 | 61,517,000 | 61,518,000 | 61,519,000 | 61,520,000 |
| 61,521,000 | 61,522,000 | 61,523,000 | 61,524,000 | 61,525,000 | 61,526,000 | 61,527,000 | 61,528,000 |
| 61,529,000 | 61,530,000 | 61,531,000 | 61,532,000 | 61,533,000 | 61,534,000 | 61,535,000 | 61,536,000 |
| 61,537,000 | 61,538,000 | 61,539,000 | 61,540,000 | 61,541,000 | 61,542,000 | 61,543,000 | 61,544,000 |

Supplemental Figure S8

|            |            |            |            |            |            |            |            |
|------------|------------|------------|------------|------------|------------|------------|------------|
| 61,545,000 | 61,546,000 | 61,547,000 | 61,548,000 | 61,549,000 | 61,550,000 | 61,551,000 | 61,552,000 |
| 61,553,000 | 61,554,000 | 61,555,000 | 61,556,000 | 61,557,000 | 61,558,000 | 61,559,000 | 61,560,000 |
| 61,561,000 | 61,562,000 | 61,563,000 | 61,564,000 | 61,565,000 | 61,566,000 | 61,567,000 | 61,568,000 |
| 61,569,000 | 61,570,000 | 61,571,000 | 61,572,000 | 61,573,000 | 61,574,000 | 61,575,000 | 61,576,000 |
| 61,577,000 | 61,578,000 | 61,579,000 | 61,580,000 | 61,581,000 | 61,582,000 | 61,583,000 | 61,584,000 |
| 61,585,000 | 61,586,000 | 61,587,000 | 61,588,000 | 61,589,000 | 61,590,000 | 61,591,000 | 61,592,000 |
| 61,593,000 | 61,594,000 | 61,595,000 | 61,596,000 | 61,597,000 | 61,598,000 | 61,599,000 | 61,600,000 |
| 61,601,000 | 61,602,000 | 61,603,000 | 61,604,000 | 61,605,000 | 61,606,000 | 61,607,000 | 61,608,000 |
| 61,609,000 | 61,610,000 | 61,611,000 | 61,612,000 | 61,613,000 | 61,614,000 | 61,615,000 | 61,616,000 |
| 61,617,000 | 61,618,000 | 61,619,000 | 61,620,000 | 61,621,000 | 61,622,000 | 61,623,000 | 61,624,000 |
| 61,625,000 | 61,626,000 | 61,627,000 | 61,628,000 | 61,629,000 | 61,630,000 | 61,631,000 | 61,632,000 |
| 61,633,000 | 61,634,000 | 61,635,000 | 61,636,000 | 61,637,000 | 61,638,000 | 61,639,000 | 61,640,000 |
| 61,641,000 | 61,642,000 | 61,643,000 | 61,644,000 | 61,645,000 | 61,646,000 | 61,647,000 | 61,648,000 |
| 61,649,000 | 61,650,000 | 61,651,000 | 61,652,000 | 61,653,000 | 61,654,000 | 61,655,000 | 61,656,000 |
| 61,657,000 | 61,658,000 | 61,659,000 | 61,660,000 | 61,661,000 | 61,662,000 | 61,663,000 | 61,664,000 |
| 61,665,000 | 61,666,000 | 61,667,000 | 61,668,000 | 61,669,000 | 61,670,000 | 61,671,000 | 61,672,000 |
| 61,673,000 | 61,674,000 | 61,675,000 | 61,676,000 | 61,677,000 | 61,678,000 | 61,679,000 | 61,680,000 |
| 61,681,000 | 61,682,000 | 61,683,000 | 61,684,000 | 61,685,000 | 61,686,000 | 61,687,000 | 61,688,000 |
| 61,689,000 | 61,690,000 | 61,691,000 | 61,692,000 | 61,693,000 | 61,694,000 | 61,695,000 | 61,696,000 |
| 61,697,000 | 61,698,000 | 61,699,000 | 61,700,000 | 61,701,000 | 61,702,000 | 61,703,000 | 61,704,000 |
| 61,705,000 | 61,706,000 | 61,707,000 | 61,708,000 | 61,709,000 | 61,710,000 | 61,711,000 | 61,712,000 |
| 61,713,000 | 61,714,000 | 61,715,000 | 61,716,000 | 61,717,000 | 61,718,000 | 61,719,000 | 61,720,000 |

Supplemental Figure S8

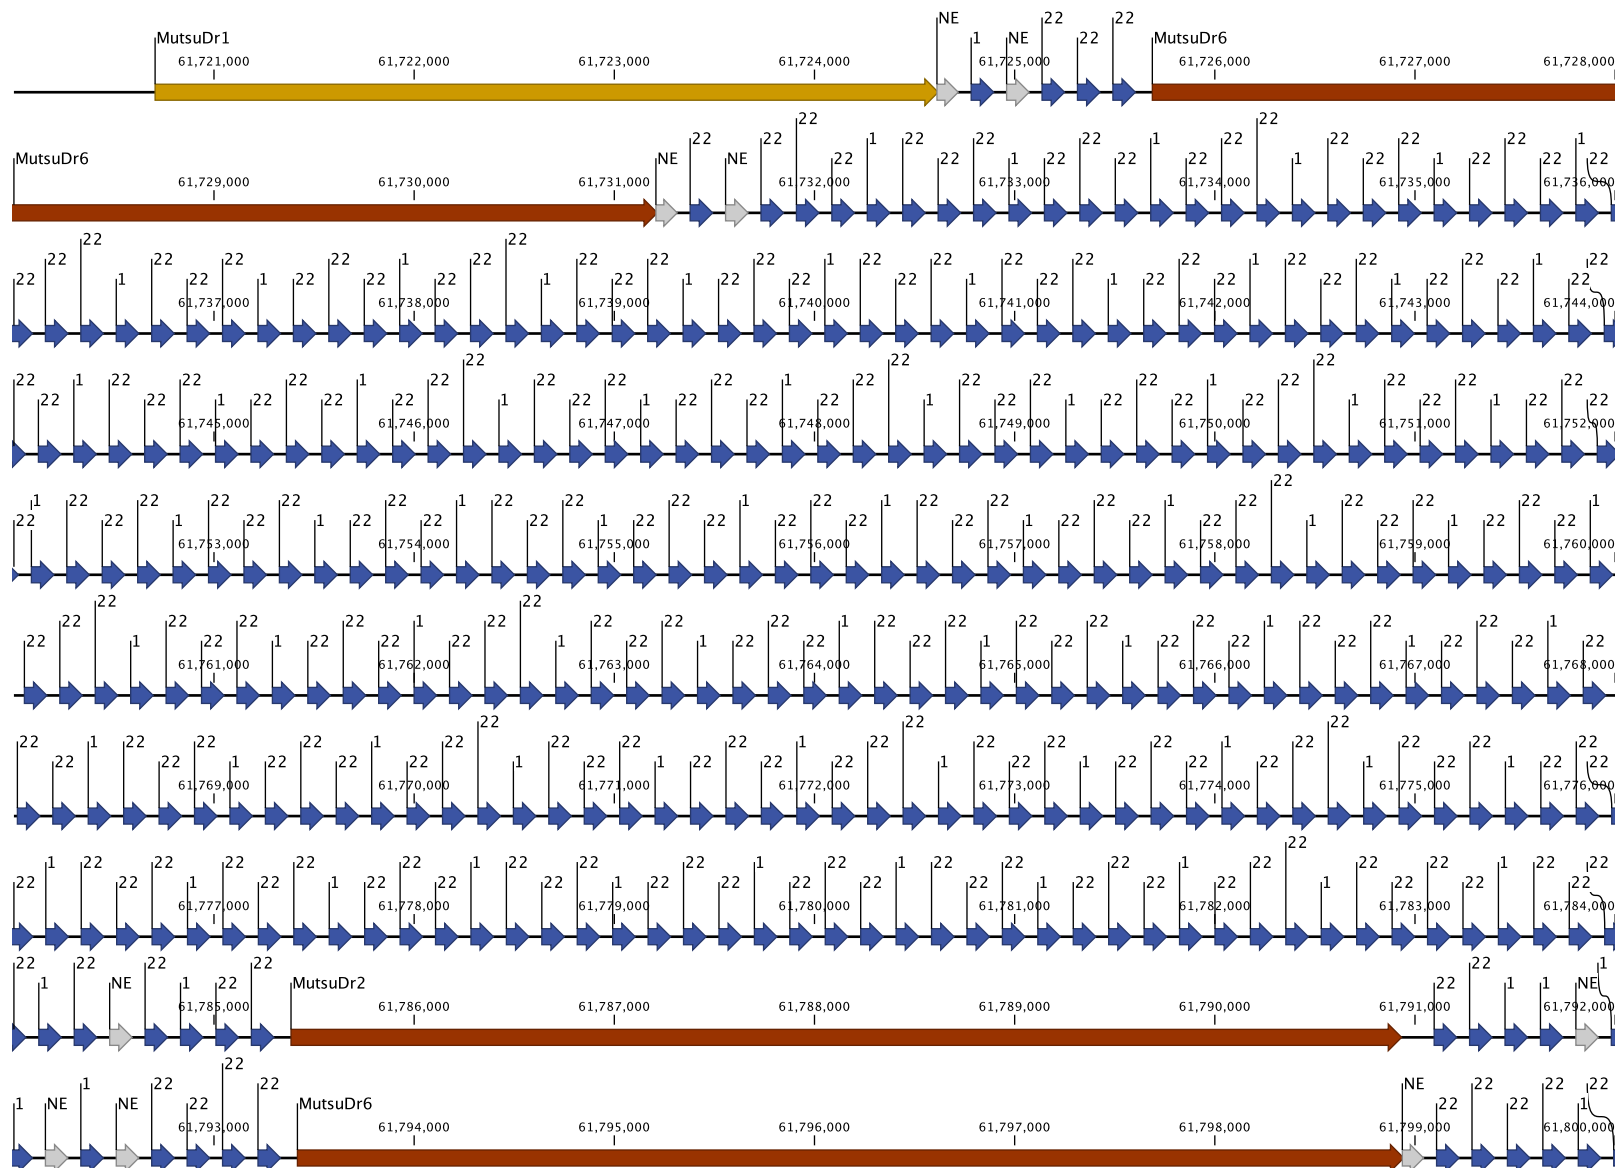

Supplemental Figure S8

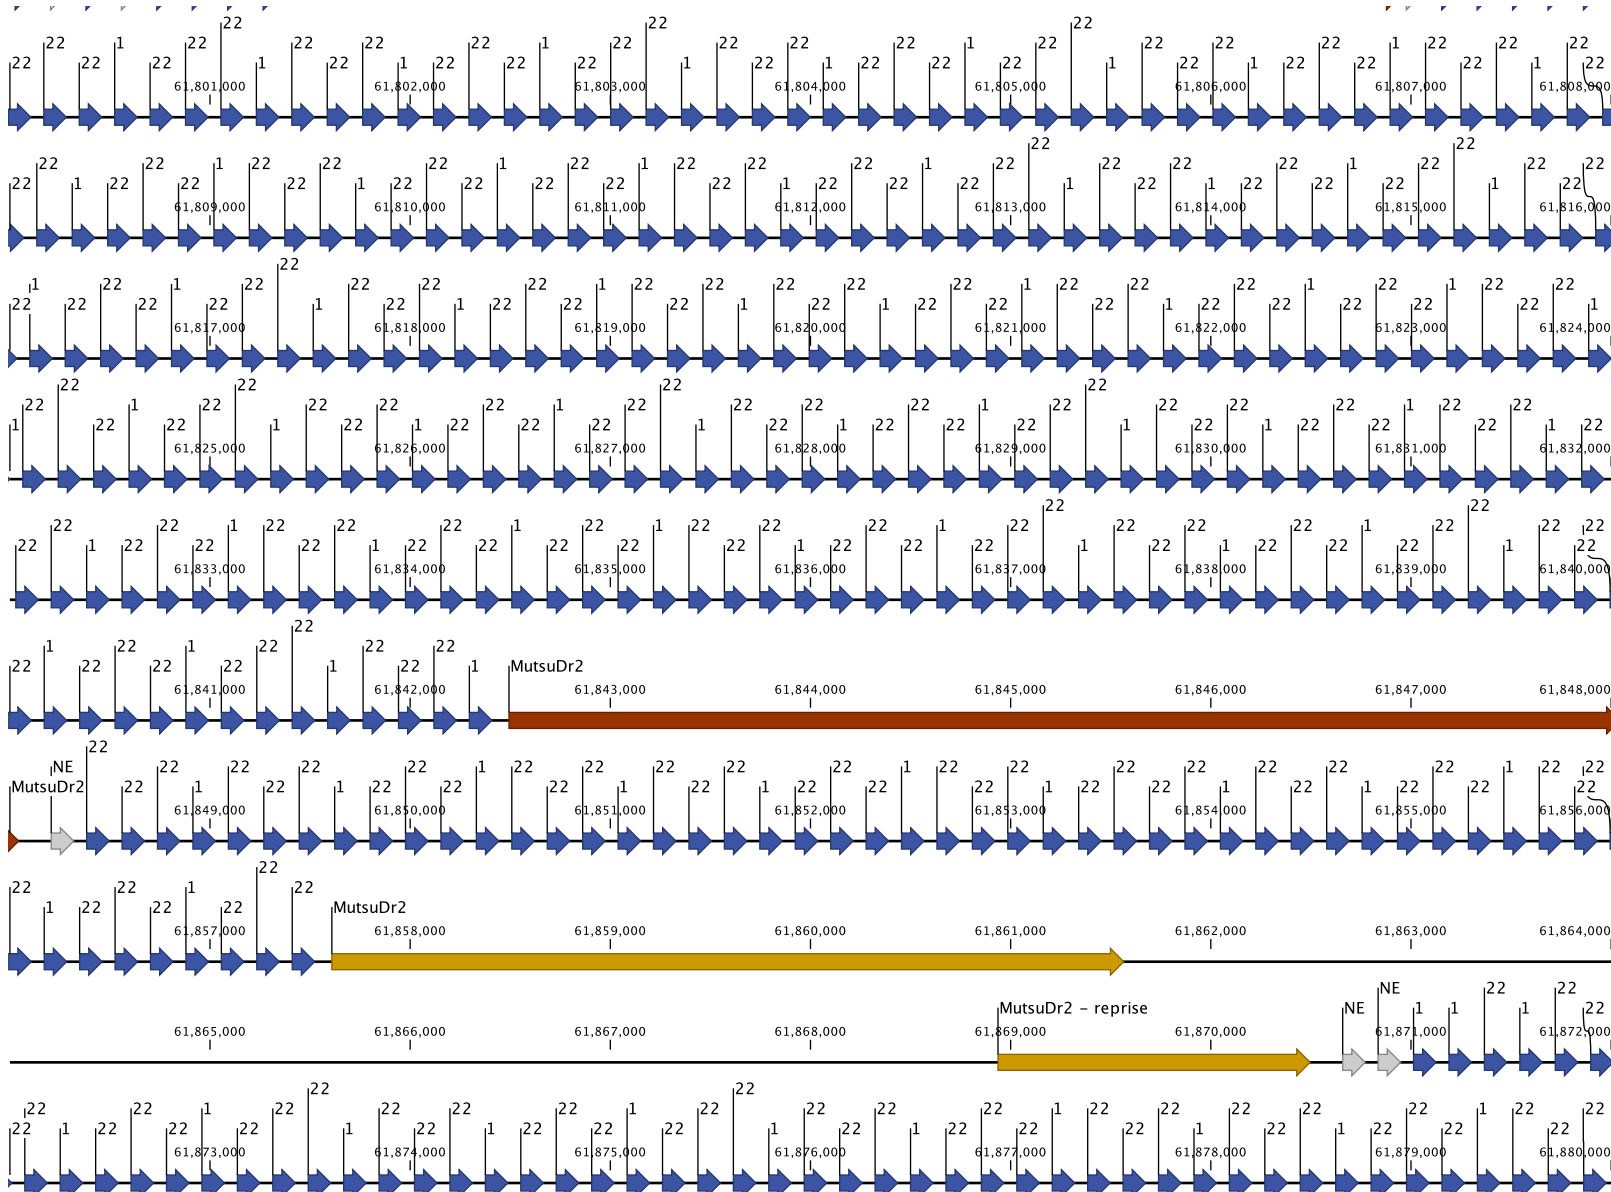

Supplemental Figure S8

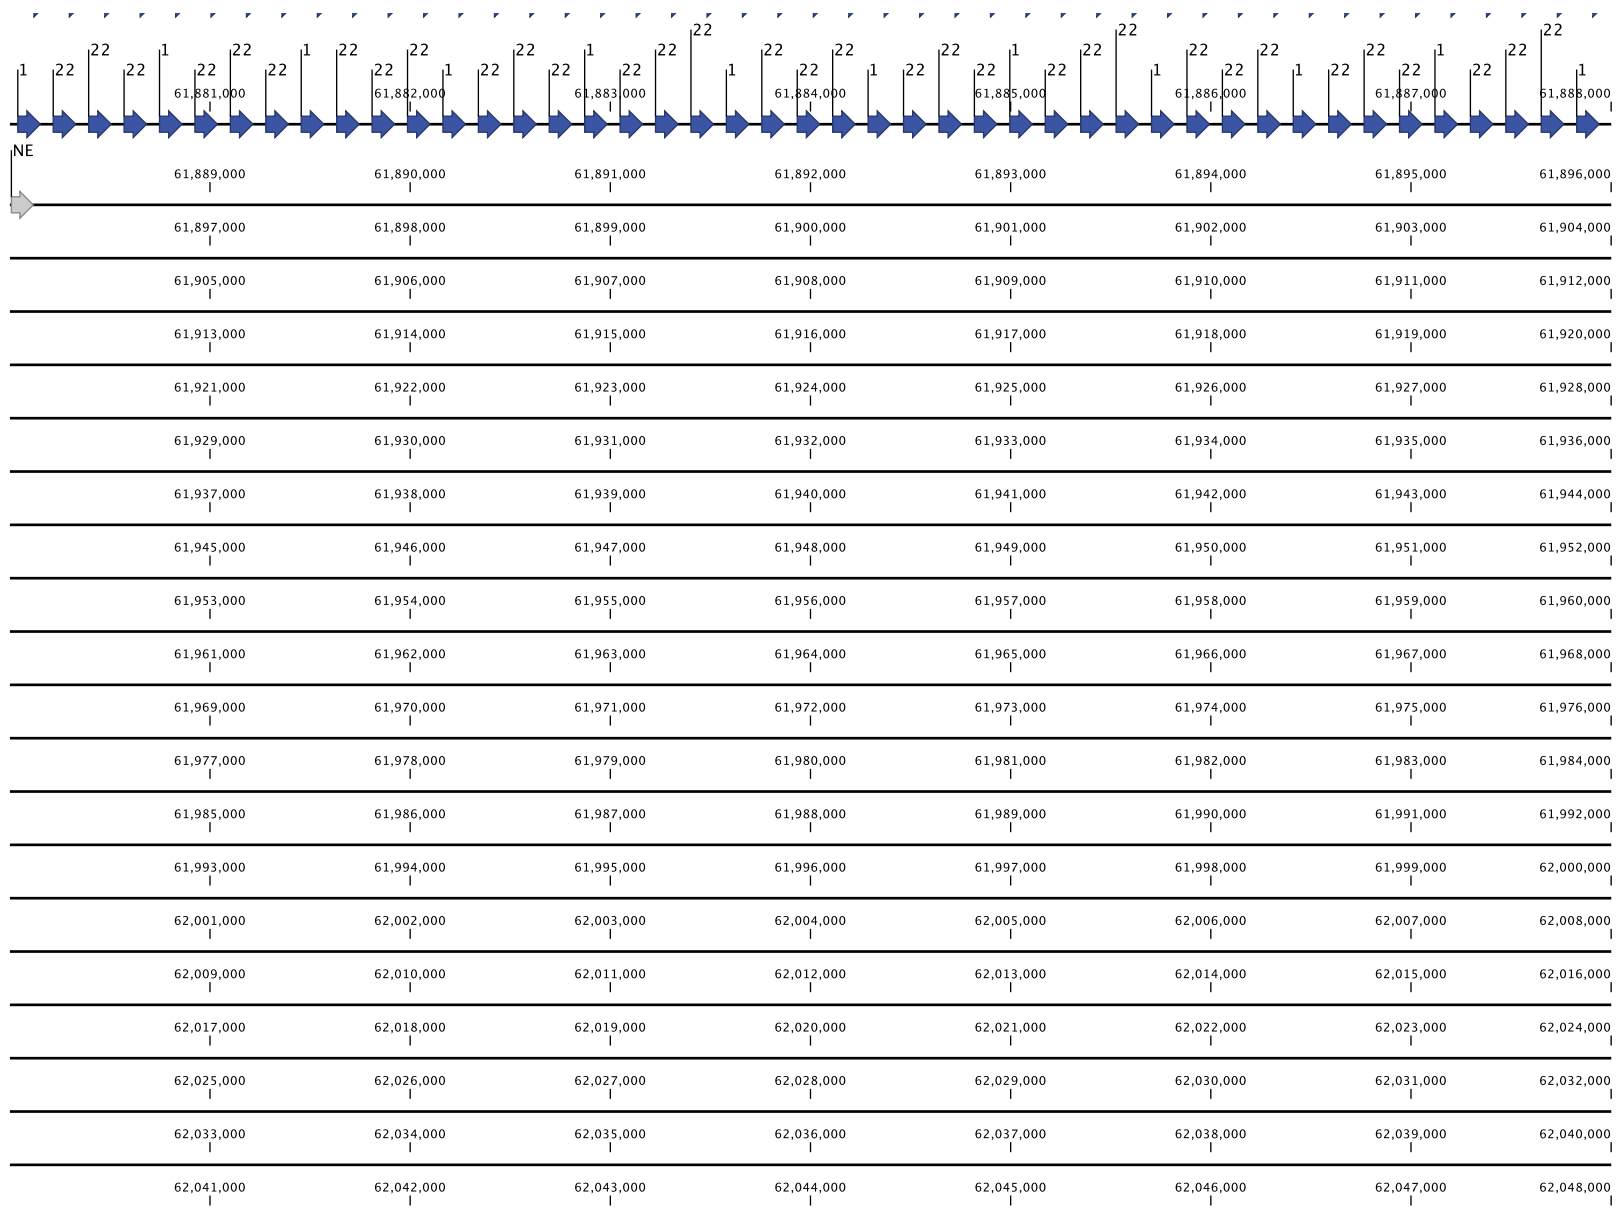



Supplemental Figure S8

|            |            |            |            |            |            |            |            |
|------------|------------|------------|------------|------------|------------|------------|------------|
| 62,049,000 | 62,050,000 | 62,051,000 | 62,052,000 | 62,053,000 | 62,054,000 | 62,055,000 | 62,056,000 |
| 62,057,000 | 62,058,000 | 62,059,000 | 62,060,000 | 62,061,000 | 62,062,000 | 62,063,000 | 62,064,000 |
| 62,065,000 | 62,066,000 | 62,067,000 | 62,068,000 | 62,069,000 | 62,070,000 | 62,071,000 | 62,072,000 |
| 62,073,000 | 62,074,000 | 62,075,000 | 62,076,000 | 62,077,000 | 62,078,000 | 62,079,000 | 62,080,000 |
| 62,081,000 | 62,082,000 | 62,083,000 | 62,084,000 | 62,085,000 | 62,086,000 | 62,087,000 | 62,088,000 |
| 62,089,000 | 62,090,000 | 62,091,000 | 62,092,000 | 62,093,000 | 62,094,000 | 62,095,000 | 62,096,000 |
| 62,097,000 | 62,098,000 | 62,099,000 | 62,100,000 | 62,101,000 | 62,102,000 | 62,103,000 | 62,104,000 |
| 62,105,000 | 62,106,000 | 62,107,000 | 62,108,000 | 62,109,000 | 62,110,000 | 62,111,000 | 62,112,000 |
| 62,113,000 | 62,114,000 | 62,115,000 | 62,116,000 | 62,117,000 | 62,118,000 | 62,119,000 | 62,120,000 |
| 62,121,000 | 62,122,000 | 62,123,000 | 62,124,000 | 62,125,000 | 62,126,000 | 62,127,000 | 62,128,000 |
| 62,129,000 | 62,130,000 | 62,131,000 | 62,132,000 | 62,133,000 | 62,134,000 | 62,135,000 | 62,136,000 |
| 62,137,000 | 62,138,000 | 62,139,000 | 62,140,000 | 62,141,000 | 62,142,000 | 62,143,000 | 62,144,000 |
| 62,145,000 | 62,146,000 | 62,147,000 | 62,148,000 | 62,149,000 | 62,150,000 | 62,151,000 | 62,152,000 |
| 62,153,000 | 62,154,000 | 62,155,000 | 62,156,000 | 62,157,000 | 62,158,000 | 62,159,000 | 62,160,000 |
| 62,161,000 | 62,162,000 | 62,163,000 | 62,164,000 | 62,165,000 | 62,166,000 | 62,167,000 | 62,168,000 |
| 62,169,000 | 62,170,000 | 62,171,000 | 62,172,000 | 62,173,000 | 62,174,000 | 62,175,000 | 62,176,000 |
| 62,177,000 | 62,178,000 | 62,179,000 | 62,180,000 | 62,181,000 | 62,182,000 | 62,183,000 | 62,184,000 |
| 62,185,000 | 62,186,000 | 62,187,000 | 62,188,000 | 62,189,000 | 62,190,000 | 62,191,000 | 62,192,000 |
| 62,193,000 | 62,194,000 | 62,195,000 | 62,196,000 | 62,197,000 | 62,198,000 | 62,199,000 | 62,200,000 |
| 62,201,000 | 62,202,000 | 62,203,000 | 62,204,000 | 62,205,000 | 62,206,000 | 62,207,000 | 62,208,000 |
| 62,209,000 | 62,210,000 | 62,211,000 | 62,212,000 | 62,213,000 | 62,214,000 | 62,215,000 | 62,216,000 |
| 62,217,000 | 62,218,000 | 62,219,000 | 62,220,000 | 62,221,000 | 62,222,000 | 62,223,000 | 62,224,000 |
| 62,225,000 | 62,226,000 | 62,227,000 | 62,228,000 | 62,229,000 | 62,230,000 | 62,231,000 | 62,232,000 |

Supplemental Figure S8

|            |            |            |            |            |            |            |            |
|------------|------------|------------|------------|------------|------------|------------|------------|
| 62,233,000 | 62,234,000 | 62,235,000 | 62,236,000 | 62,237,000 | 62,238,000 | 62,239,000 | 62,240,000 |
| 62,241,000 | 62,242,000 | 62,243,000 | 62,244,000 | 62,245,000 | 62,246,000 | 62,247,000 | 62,248,000 |
| 62,249,000 | 62,250,000 | 62,251,000 | 62,252,000 | 62,253,000 | 62,254,000 | 62,255,000 | 62,256,000 |
| 62,257,000 | 62,258,000 | 62,259,000 | 62,260,000 | 62,261,000 | 62,262,000 | 62,263,000 | 62,264,000 |
| 62,265,000 | 62,266,000 | 62,267,000 | 62,268,000 | 62,269,000 | 62,270,000 | 62,271,000 | 62,272,000 |
| 62,273,000 | 62,274,000 | 62,275,000 | 62,276,000 | 62,277,000 | 62,278,000 | 62,279,000 | 62,280,000 |
| 62,281,000 | 62,282,000 | 62,283,000 | 62,284,000 | 62,285,000 | 62,286,000 | 62,287,000 | 62,288,000 |
| 62,289,000 | 62,290,000 | 62,291,000 | 62,292,000 | 62,293,000 | 62,294,000 | 62,295,000 | 62,296,000 |
| 62,297,000 | 62,298,000 | 62,299,000 | 62,300,000 | 62,301,000 | 62,302,000 | 62,303,000 | 62,304,000 |
| 62,305,000 | 62,306,000 | 62,307,000 | 62,308,000 | 62,309,000 | 62,310,000 | 62,311,000 | 62,312,000 |
| 62,313,000 | 62,314,000 | 62,315,000 | 62,316,000 | 62,317,000 | 62,318,000 | 62,319,000 | 62,320,000 |
| 62,321,000 | 62,322,000 | 62,323,000 | 62,324,000 | 62,325,000 | 62,326,000 | 62,327,000 | 62,328,000 |
| 62,329,000 | 62,330,000 | 62,331,000 | 62,332,000 | 62,333,000 | 62,334,000 | 62,335,000 | 62,336,000 |
| 62,337,000 | 62,338,000 | 62,339,000 | 62,340,000 | 62,341,000 | 62,342,000 | 62,343,000 | 62,344,000 |
| 62,345,000 | 62,346,000 | 62,347,000 | 62,348,000 | 62,349,000 | 62,350,000 | 62,351,000 | 62,352,000 |
| 62,353,000 | 62,354,000 | 62,355,000 | 62,356,000 | 62,357,000 | 62,358,000 | 62,359,000 | 62,360,000 |
| 62,361,000 | 62,362,000 | 62,363,000 | 62,364,000 | 62,365,000 | 62,366,000 | 62,367,000 | 62,368,000 |
| 62,369,000 | 62,370,000 | 62,371,000 | 62,372,000 | 62,373,000 | 62,374,000 | 62,375,000 | 62,376,000 |
| 62,377,000 | 62,378,000 | 62,379,000 | 62,380,000 | 62,381,000 | 62,382,000 | 62,383,000 | 62,384,000 |
| 62,385,000 | 62,386,000 | 62,387,000 | 62,388,000 | 62,389,000 | 62,390,000 | 62,391,000 | 62,392,000 |
| 62,393,000 | 62,394,000 | 62,395,000 | 62,396,000 | 62,397,000 | 62,398,000 | 62,399,000 | 62,400,000 |
| 62,401,000 | 62,402,000 | 62,403,000 | 62,404,000 | 62,405,000 | 62,406,000 | 62,407,000 | 62,408,000 |
| 62,409,000 | 62,410,000 | 62,411,000 | 62,412,000 | 62,413,000 | 62,414,000 | 62,415,000 | 62,416,000 |

Supplemental Figure S8

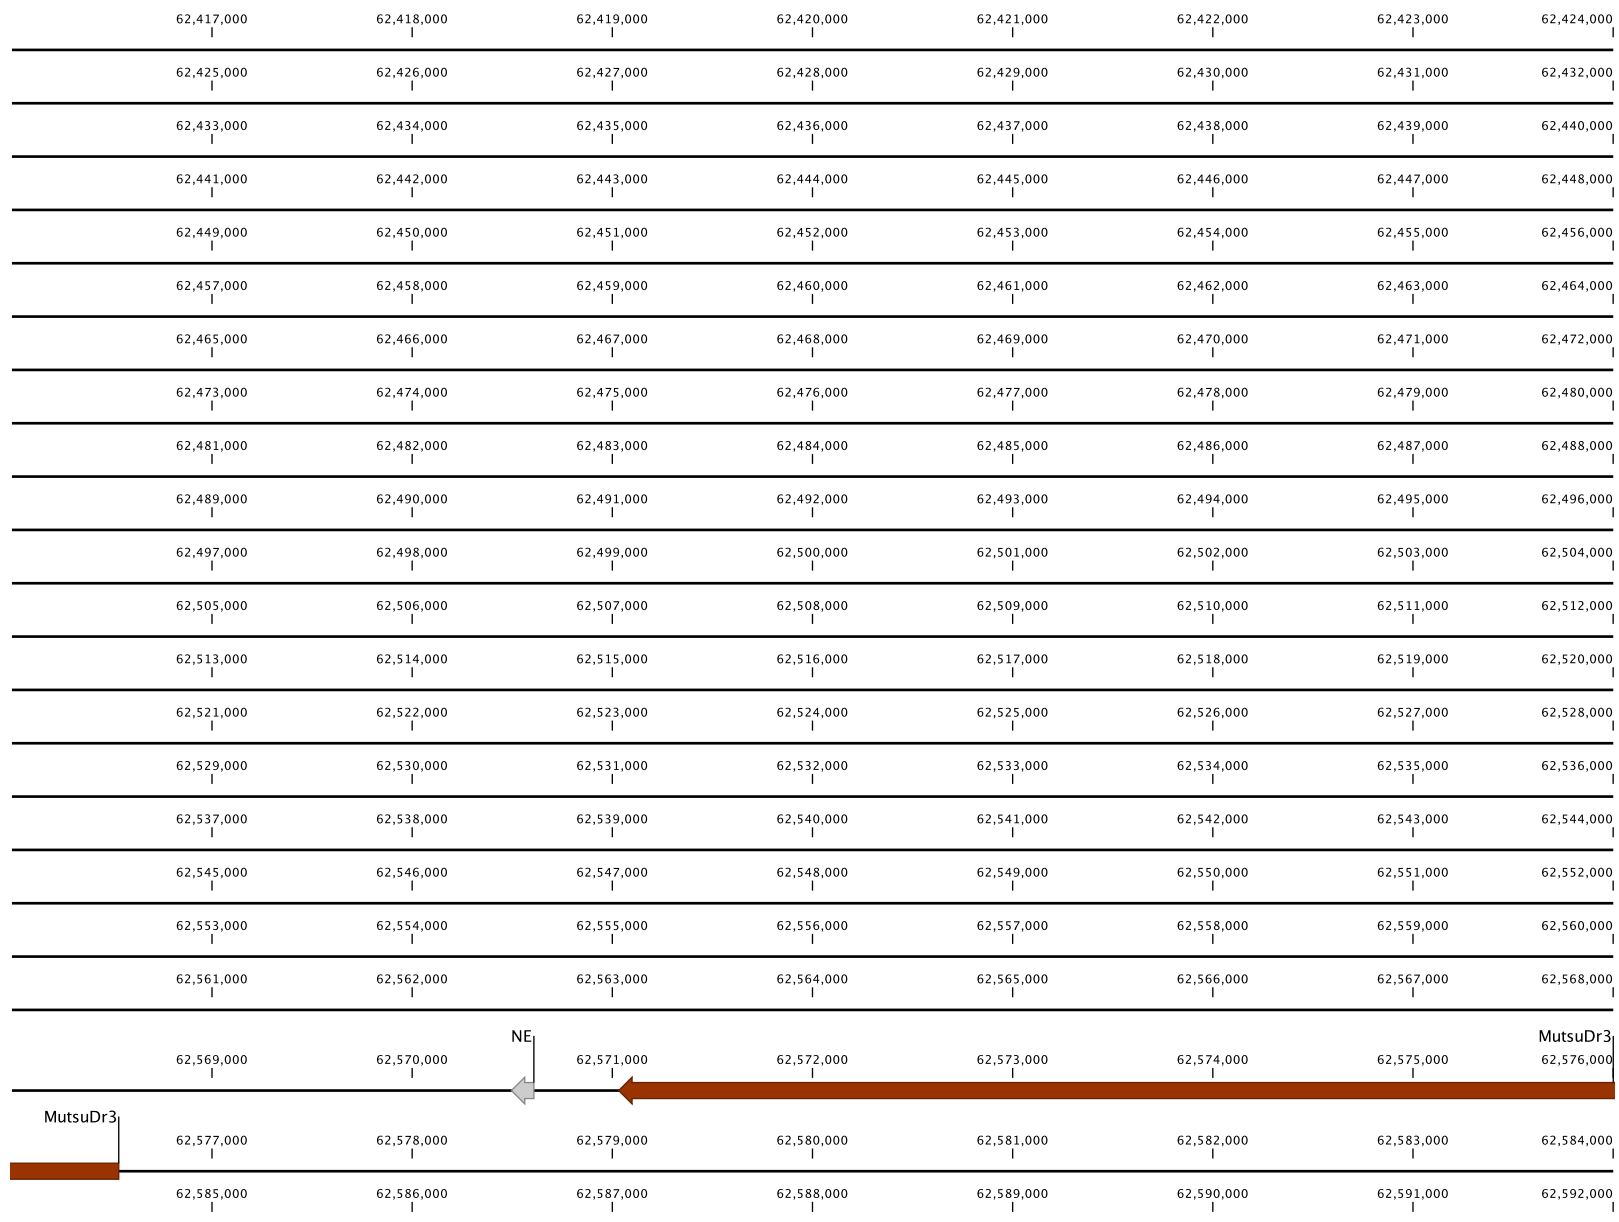

Supplemental Figure S8

|            |            |            |            |            |            |            |            |
|------------|------------|------------|------------|------------|------------|------------|------------|
| 62,593,000 | 62,594,000 | 62,595,000 | 62,596,000 | 62,597,000 | 62,598,000 | 62,599,000 | 62,600,000 |
| 62,601,000 | 62,602,000 | 62,603,000 | 62,604,000 | 62,605,000 | 62,606,000 | 62,607,000 | 62,608,000 |
| 62,609,000 | 62,610,000 | 62,611,000 | 62,612,000 | 62,613,000 | 62,614,000 | 62,615,000 | 62,616,000 |
| 62,617,000 | 62,618,000 | 62,619,000 | 62,620,000 | 62,621,000 | 62,622,000 | 62,623,000 | 62,624,000 |
| 62,625,000 | 62,626,000 | 62,627,000 | 62,628,000 | 62,629,000 | 62,630,000 | 62,631,000 | 62,632,000 |
| 62,633,000 | 62,634,000 | 62,635,000 | 62,636,000 | 62,637,000 | 62,638,000 | 62,639,000 | 62,640,000 |
| 62,641,000 | 62,642,000 | 62,643,000 | 62,644,000 | 62,645,000 | 62,646,000 | 62,647,000 | 62,648,000 |
| 62,649,000 | 62,650,000 | 62,651,000 | 62,652,000 | 62,653,000 | 62,654,000 | 62,655,000 | 62,656,000 |
| 62,657,000 | 62,658,000 | 62,659,000 | 62,660,000 | 62,661,000 | 62,662,000 | 62,663,000 | 62,664,000 |
| 62,665,000 | 62,666,000 | 62,667,000 | 62,668,000 | 62,669,000 | 62,670,000 | 62,671,000 | 62,672,000 |
| 62,673,000 | 62,674,000 | 62,675,000 | 62,676,000 | 62,677,000 | 62,678,000 | 62,679,000 | 62,680,000 |
| 62,681,000 | 62,682,000 | 62,683,000 | 62,684,000 | 62,685,000 | 62,686,000 | 62,687,000 | 62,688,000 |
| 62,689,000 | 62,690,000 | 62,691,000 | 62,692,000 | 62,693,000 | 62,694,000 | 62,695,000 | 62,696,000 |
| 62,697,000 | 62,698,000 | 62,699,000 | 62,700,000 | 62,701,000 | 62,702,000 | 62,703,000 | 62,704,000 |
| 62,705,000 | 62,706,000 | 62,707,000 | 62,708,000 | 62,709,000 | 62,710,000 | 62,711,000 | 62,712,000 |
| 62,713,000 | 62,714,000 | 62,715,000 | 62,716,000 | 62,717,000 | 62,718,000 | 62,719,000 | 62,720,000 |
| 62,721,000 | 62,722,000 | 62,723,000 | 62,724,000 | 62,725,000 | 62,726,000 | 62,727,000 | 62,728,000 |
| 62,729,000 | 62,730,000 | 62,731,000 | 62,732,000 | 62,733,000 | 62,734,000 | 62,735,000 | 62,736,000 |
| 62,737,000 | 62,738,000 | 62,739,000 | 62,740,000 | 62,741,000 | 62,742,000 | 62,743,000 | 62,744,000 |
| 62,745,000 | 62,746,000 | 62,747,000 | 62,748,000 | 62,749,000 | 62,750,000 | 62,751,000 | 62,752,000 |
| 62,753,000 | 62,754,000 | 62,755,000 | 62,756,000 | 62,757,000 | 62,758,000 | 62,759,000 | 62,760,000 |
| 62,761,000 | 62,762,000 | 62,763,000 | 62,764,000 | 62,765,000 | 62,766,000 | 62,767,000 | 62,768,000 |
| 62,769,000 | 62,770,000 | 62,771,000 | 62,772,000 | 62,773,000 | 62,774,000 | 62,775,000 | 62,776,000 |

Supplemental Figure S8

|            |            |            |            |            |            |            |            |
|------------|------------|------------|------------|------------|------------|------------|------------|
| 62,777,000 | 62,778,000 | 62,779,000 | 62,780,000 | 62,781,000 | 62,782,000 | 62,783,000 | 62,784,000 |
| 62,785,000 | 62,786,000 | 62,787,000 | 62,788,000 | 62,789,000 | 62,790,000 | 62,791,000 | 62,792,000 |
| 62,793,000 | 62,794,000 | 62,795,000 | 62,796,000 | 62,797,000 | 62,798,000 | 62,799,000 | 62,800,000 |
| 62,801,000 | 62,802,000 | 62,803,000 | 62,804,000 | 62,805,000 | 62,806,000 | 62,807,000 | 62,808,000 |
| 62,809,000 | 62,810,000 | 62,811,000 | 62,812,000 | 62,813,000 | 62,814,000 | 62,815,000 | 62,816,000 |
| 62,817,000 | 62,818,000 | 62,819,000 | 62,820,000 | 62,821,000 | 62,822,000 | 62,823,000 | 62,824,000 |
| 62,825,000 | 62,826,000 | 62,827,000 | 62,828,000 | 62,829,000 | 62,830,000 | 62,831,000 | 62,832,000 |
| 62,833,000 | 62,834,000 | 62,835,000 | 62,836,000 | 62,837,000 | 62,838,000 | 62,839,000 | 62,840,000 |
| 62,841,000 | 62,842,000 | 62,843,000 | 62,844,000 | 62,845,000 | 62,846,000 | 62,847,000 | 62,848,000 |
| 62,849,000 | 62,850,000 | 62,851,000 | 62,852,000 | 62,853,000 | 62,854,000 | 62,855,000 | 62,856,000 |
| 62,857,000 | 62,858,000 | 62,859,000 | 62,860,000 | 62,861,000 | 62,862,000 | 62,863,000 | 62,864,000 |
| 62,865,000 | 62,866,000 | 62,867,000 | 62,868,000 | 62,869,000 | 62,870,000 | 62,871,000 | 62,872,000 |
| 62,873,000 | 62,874,000 | 62,875,000 | 62,876,000 | 62,877,000 | 62,878,000 | 62,879,000 | 62,880,000 |
| 62,881,000 | 62,882,000 | 62,883,000 | 62,884,000 | 62,885,000 | 62,886,000 | 62,887,000 | 62,888,000 |
| 62,889,000 | 62,890,000 | 62,891,000 | 62,892,000 | 62,893,000 | 62,894,000 | 62,895,000 | 62,896,000 |
| 62,897,000 | 62,898,000 | 62,899,000 | 62,900,000 | 62,901,000 | 62,902,000 | 62,903,000 | 62,904,000 |
| 62,905,000 | 62,906,000 | 62,907,000 | 62,908,000 | 62,909,000 | 62,910,000 | 62,911,000 | 62,912,000 |
| 62,913,000 | 62,914,000 | 62,915,000 | 62,916,000 | 62,917,000 | 62,918,000 | 62,919,000 | 62,920,000 |
| 62,921,000 | 62,922,000 | 62,923,000 | 62,924,000 | 62,925,000 | 62,926,000 | 62,927,000 | 62,928,000 |
| 62,929,000 | 62,930,000 | 62,931,000 | 62,932,000 | 62,933,000 | 62,934,000 | 62,935,000 | 62,936,000 |
| 62,937,000 | 62,938,000 | 62,939,000 | 62,940,000 | 62,941,000 | 62,942,000 | 62,943,000 | 62,944,000 |
| 62,945,000 | 62,946,000 | 62,947,000 | 62,948,000 | 62,949,000 | 62,950,000 | 62,951,000 | 62,952,000 |
| 62,953,000 | 62,954,000 | 62,955,000 | 62,956,000 | 62,957,000 | 62,958,000 | 62,959,000 | 62,960,000 |

Supplemental Figure S8

|            |            |            |            |            |            |            |            |
|------------|------------|------------|------------|------------|------------|------------|------------|
| 62,961,000 | 62,962,000 | 62,963,000 | 62,964,000 | 62,965,000 | 62,966,000 | 62,967,000 | 62,968,000 |
| 62,969,000 | 62,970,000 | 62,971,000 | 62,972,000 | 62,973,000 | 62,974,000 | 62,975,000 | 62,976,000 |
| 62,977,000 | 62,978,000 | 62,979,000 | 62,980,000 | 62,981,000 | 62,982,000 | 62,983,000 | 62,984,000 |
| 62,985,000 | 62,986,000 | 62,987,000 | 62,988,000 | 62,989,000 | 62,990,000 | 62,991,000 | 62,992,000 |
| 62,993,000 | 62,994,000 | 62,995,000 | 62,996,000 | 62,997,000 | 62,998,000 | 62,999,000 | 63,000,000 |
| 63,001,000 | 63,002,000 | 63,003,000 | 63,004,000 | 63,005,000 | 63,006,000 | 63,007,000 | 63,008,000 |
| 63,009,000 | 63,010,000 | 63,011,000 | 63,012,000 | 63,013,000 | 63,014,000 | 63,015,000 | 63,016,000 |
| 63,017,000 | 63,018,000 | 63,019,000 | 63,020,000 | 63,021,000 | 63,022,000 | 63,023,000 | 63,024,000 |
| 63,025,000 | 63,026,000 | 63,027,000 | 63,028,000 | 63,029,000 | 63,030,000 | 63,031,000 | 63,032,000 |
| 63,033,000 | 63,034,000 | 63,035,000 | 63,036,000 | 63,037,000 | 63,038,000 | 63,039,000 | 63,040,000 |
| 63,041,000 | 63,042,000 | 63,043,000 | 63,044,000 | 63,045,000 | 63,046,000 | 63,047,000 | 63,048,000 |
| 63,049,000 | 63,050,000 | 63,051,000 | 63,052,000 | 63,053,000 | 63,054,000 | 63,055,000 | 63,056,000 |
| 63,057,000 | 63,058,000 | 63,059,000 | 63,060,000 | 63,061,000 | 63,062,000 | 63,063,000 | 63,064,000 |
| 63,065,000 | 63,066,000 | 63,067,000 | 63,068,000 | 63,069,000 | 63,070,000 | 63,071,000 | 63,072,000 |
| 63,073,000 | 63,074,000 | 63,075,000 | 63,076,000 | 63,077,000 | 63,078,000 | 63,079,000 | 63,080,000 |
| 63,081,000 | 63,082,000 | 63,083,000 | 63,084,000 | 63,085,000 | 63,086,000 | 63,087,000 | 63,088,000 |
| 63,089,000 | 63,090,000 | 63,091,000 | 63,092,000 | 63,093,000 | 63,094,000 | 63,095,000 | 63,096,000 |
| 63,097,000 | 63,098,000 | 63,099,000 | 63,100,000 | 63,101,000 | 63,102,000 | 63,103,000 | 63,104,000 |
| 63,105,000 | 63,106,000 | 63,107,000 | 63,108,000 | 63,109,000 | 63,110,000 | 63,111,000 | 63,112,000 |
| 63,113,000 | 63,114,000 | 63,115,000 | 63,116,000 | 63,117,000 | 63,118,000 | 63,119,000 | 63,120,000 |
| 63,121,000 | 63,122,000 | 63,123,000 | 63,124,000 | 63,125,000 | 63,126,000 | 63,127,000 | 63,128,000 |
| 63,129,000 | 63,130,000 | 63,131,000 | 63,132,000 | 63,133,000 | 63,134,000 | 63,135,000 | 63,136,000 |
| 63,137,000 | 63,138,000 | 63,139,000 | 63,140,000 | 63,141,000 | 63,142,000 | 63,143,000 | 63,144,000 |

Supplemental Figure S8

|            |            |            |            |            |            |            |            |
|------------|------------|------------|------------|------------|------------|------------|------------|
| 63,145,000 | 63,146,000 | 63,147,000 | 63,148,000 | 63,149,000 | 63,150,000 | 63,151,000 | 63,152,000 |
| 63,153,000 | 63,154,000 | 63,155,000 | 63,156,000 | 63,157,000 | 63,158,000 | 63,159,000 | 63,160,000 |
| 63,161,000 | 63,162,000 | 63,163,000 | 63,164,000 | 63,165,000 | 63,166,000 | 63,167,000 | 63,168,000 |
| 63,169,000 | 63,170,000 | 63,171,000 | 63,172,000 | 63,173,000 | 63,174,000 | 63,175,000 | 63,176,000 |
| 63,177,000 | 63,178,000 | 63,179,000 | 63,180,000 | 63,181,000 | 63,182,000 | 63,183,000 | 63,184,000 |
| 63,185,000 | 63,186,000 | 63,187,000 | 63,188,000 | 63,189,000 | 63,190,000 | 63,191,000 | 63,192,000 |
| 63,193,000 | 63,194,000 | 63,195,000 | 63,196,000 | 63,197,000 | 63,198,000 | 63,199,000 | 63,200,000 |
| 63,201,000 | 63,202,000 | 63,203,000 | 63,204,000 | 63,205,000 | 63,206,000 | 63,207,000 | 63,208,000 |
| 63,209,000 | 63,210,000 | 63,211,000 | 63,212,000 | 63,213,000 | 63,214,000 | 63,215,000 | 63,216,000 |
| 63,217,000 | 63,218,000 | 63,219,000 | 63,220,000 | 63,221,000 | 63,222,000 | 63,223,000 | 63,224,000 |
| 63,225,000 | 63,226,000 | 63,227,000 | 63,228,000 | 63,229,000 | 63,230,000 | 63,231,000 | 63,232,000 |
| 63,233,000 | 63,234,000 | 63,235,000 | 63,236,000 | 63,237,000 | 63,238,000 | 63,239,000 | 63,240,000 |
| 63,241,000 | 63,242,000 | 63,243,000 | 63,244,000 | 63,245,000 | 63,246,000 | 63,247,000 | 63,248,000 |
| 63,249,000 | 63,250,000 | 63,251,000 | 63,252,000 | 63,253,000 | 63,254,000 | 63,255,000 | 63,256,000 |
| 63,257,000 | 63,258,000 | 63,259,000 | 63,260,000 | 63,261,000 | 63,262,000 | 63,263,000 | 63,264,000 |
| 63,265,000 | 63,266,000 | 63,267,000 | 63,268,000 | 63,269,000 | 63,270,000 | 63,271,000 | 63,272,000 |
| 63,273,000 | 63,274,000 | 63,275,000 | 63,276,000 | 63,277,000 | 63,278,000 | 63,279,000 | 63,280,000 |
| 63,281,000 | 63,282,000 | 63,283,000 | 63,284,000 | 63,285,000 | 63,286,000 | 63,287,000 | 63,288,000 |
| 63,289,000 | 63,290,000 | 63,291,000 | 63,292,000 | 63,293,000 | 63,294,000 | 63,295,000 | 63,296,000 |
| 63,297,000 | 63,298,000 | 63,299,000 | 63,300,000 | 63,301,000 | 63,302,000 | 63,303,000 | 63,304,000 |
| 63,305,000 | 63,306,000 | 63,307,000 | 63,308,000 | 63,309,000 | 63,310,000 | 63,311,000 | 63,312,000 |
| 63,313,000 | 63,314,000 | 63,315,000 | 63,316,000 | 63,317,000 | 63,318,000 | 63,319,000 | 63,320,000 |
| 63,321,000 | 63,322,000 | 63,323,000 | 63,324,000 | 63,325,000 | 63,326,000 | 63,327,000 | 63,328,000 |

Supplemental Figure S8

|            |            |            |            |            |            |            |            |
|------------|------------|------------|------------|------------|------------|------------|------------|
| 63,329,000 | 63,330,000 | 63,331,000 | 63,332,000 | 63,333,000 | 63,334,000 | 63,335,000 | 63,336,000 |
| 63,337,000 | 63,338,000 | 63,339,000 | 63,340,000 | 63,341,000 | 63,342,000 | 63,343,000 | 63,344,000 |
| 63,345,000 | 63,346,000 | 63,347,000 | 63,348,000 | 63,349,000 | 63,350,000 | 63,351,000 | 63,352,000 |
| 63,353,000 | 63,354,000 | 63,355,000 | 63,356,000 | 63,357,000 | 63,358,000 | 63,359,000 | 63,360,000 |
| 63,361,000 | 63,362,000 | 63,363,000 | 63,364,000 | 63,365,000 | 63,366,000 | 63,367,000 | 63,368,000 |
| 63,369,000 | 63,370,000 | 63,371,000 | 63,372,000 | 63,373,000 | 63,374,000 | 63,375,000 | 63,376,000 |
| 63,377,000 | 63,378,000 | 63,379,000 | 63,380,000 | 63,381,000 | 63,382,000 | 63,383,000 | 63,384,000 |
| 63,385,000 | 63,386,000 | 63,387,000 | 63,388,000 | 63,389,000 | 63,390,000 | 63,391,000 | 63,392,000 |
| 63,393,000 | 63,394,000 | 63,395,000 | 63,396,000 | 63,397,000 | 63,398,000 | 63,399,000 | 63,400,000 |
| 63,401,000 | 63,402,000 | 63,403,000 | 63,404,000 | 63,405,000 | 63,406,000 | 63,407,000 | 63,408,000 |
| 63,409,000 | 63,410,000 | 63,411,000 | 63,412,000 | 63,413,000 | 63,414,000 | 63,415,000 | 63,416,000 |
| 63,417,000 | 63,418,000 | 63,419,000 | 63,420,000 | 63,421,000 | 63,422,000 | 63,423,000 | 63,424,000 |
| 63,425,000 | 63,426,000 | 63,427,000 | 63,428,000 | 63,429,000 | 63,430,000 | 63,431,000 | 63,432,000 |
| 63,433,000 | 63,434,000 | 63,435,000 | 63,436,000 | 63,437,000 | 63,438,000 | 63,439,000 | 63,440,000 |
| 63,441,000 | 63,442,000 | 63,443,000 | 63,444,000 | 63,445,000 | 63,446,000 | 63,447,000 | 63,448,000 |
| 63,449,000 | 63,450,000 | 63,451,000 | 63,452,000 | 63,453,000 | 63,454,000 | 63,455,000 | 63,456,000 |
| 63,457,000 | 63,458,000 | 63,459,000 | 63,460,000 | 63,461,000 | 63,462,000 | 63,463,000 | 63,464,000 |
| 63,465,000 | 63,466,000 | 63,467,000 | 63,468,000 | 63,469,000 | 63,470,000 | 63,471,000 | 63,472,000 |
| 63,473,000 | 63,474,000 | 63,475,000 | 63,476,000 | 63,477,000 | 63,478,000 | 63,479,000 | 63,480,000 |
| 63,481,000 | 63,482,000 | 63,483,000 | 63,484,000 | 63,485,000 | 63,486,000 | 63,487,000 | 63,488,000 |
| 63,489,000 | 63,490,000 | 63,491,000 | 63,492,000 | 63,493,000 | 63,494,000 | 63,495,000 | 63,496,000 |
| 63,497,000 | 63,498,000 | 63,499,000 | 63,500,000 | 63,501,000 | 63,502,000 | 63,503,000 | 63,504,000 |
| 63,505,000 | 63,506,000 | 63,507,000 | 63,508,000 | 63,509,000 | 63,510,000 | 63,511,000 | 63,512,000 |

NE

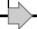



Supplemental Figure S8

|            |            |            |            |            |            |            |            |
|------------|------------|------------|------------|------------|------------|------------|------------|
| 63,513,000 | 63,514,000 | 63,515,000 | 63,516,000 | 63,517,000 | 63,518,000 | 63,519,000 | 63,520,000 |
| 63,521,000 | 63,522,000 | 63,523,000 | 63,524,000 | 63,525,000 | 63,526,000 | 63,527,000 | 63,528,000 |
| 63,529,000 | 63,530,000 | 63,531,000 | 63,532,000 | 63,533,000 | 63,534,000 | 63,535,000 | 63,536,000 |
| 63,537,000 | 63,538,000 | 63,539,000 | 63,540,000 | 63,541,000 | 63,542,000 | 63,543,000 | 63,544,000 |
| 63,545,000 | 63,546,000 | 63,547,000 | 63,548,000 | 63,549,000 | 63,550,000 | 63,551,000 | 63,552,000 |
| 63,553,000 | 63,554,000 | 63,555,000 | 63,556,000 | 63,557,000 | 63,558,000 | 63,559,000 | 63,560,000 |
| 63,561,000 | 63,562,000 | 63,563,000 | 63,564,000 | 63,565,000 | 63,566,000 | 63,567,000 | 63,568,000 |
| 63,569,000 | 63,570,000 | 63,571,000 | 63,572,000 | 63,573,000 | 63,574,000 | 63,575,000 | 63,576,000 |
| 63,577,000 | 63,578,000 | 63,579,000 | 63,580,000 | 63,581,000 | 63,582,000 | 63,583,000 | 63,584,000 |
| 63,585,000 | 63,586,000 | 63,587,000 | 63,588,000 | 63,589,000 | 63,590,000 | 63,591,000 | 63,592,000 |
| 63,593,000 | 63,594,000 | 63,595,000 | 63,596,000 | 63,597,000 | 63,598,000 | 63,599,000 | 63,600,000 |
| 63,601,000 | 63,602,000 | 63,603,000 | 63,604,000 | 63,605,000 | 63,606,000 | 63,607,000 | 63,608,000 |
| 63,609,000 | 63,610,000 | 63,611,000 | 63,612,000 | 63,613,000 | 63,614,000 | 63,615,000 | 63,616,000 |
| 63,617,000 | 63,618,000 | 63,619,000 | 63,620,000 | 63,621,000 | 63,622,000 | 63,623,000 | 63,624,000 |
| 63,625,000 | 63,626,000 | 63,627,000 | 63,628,000 | 63,629,000 | 63,630,000 | 63,631,000 | 63,632,000 |
| 63,633,000 | 63,634,000 | 63,635,000 | 63,636,000 | 63,637,000 | 63,638,000 | 63,639,000 | 63,640,000 |
| 63,641,000 | 63,642,000 | 63,643,000 | 63,644,000 | 63,645,000 | 63,646,000 | 63,647,000 | 63,648,000 |
| 63,649,000 | 63,650,000 | 63,651,000 | 63,652,000 | 63,653,000 | 63,654,000 | 63,655,000 | 63,656,000 |
| 63,657,000 | 63,658,000 | 63,659,000 | 63,660,000 | 63,661,000 | 63,662,000 | 63,663,000 | 63,664,000 |
| 63,665,000 | 63,666,000 | 63,667,000 | 63,668,000 | 63,669,000 | 63,670,000 | 63,671,000 | 63,672,000 |
| 63,673,000 | 63,674,000 | 63,675,000 | 63,676,000 | 63,677,000 | 63,678,000 | 63,679,000 | 63,680,000 |
| 63,681,000 | 63,682,000 | 63,683,000 | 63,684,000 | 63,685,000 | 63,686,000 | 63,687,000 | 63,688,000 |
| 63,689,000 | 63,690,000 | 63,691,000 | 63,692,000 | 63,693,000 | 63,694,000 | 63,695,000 | 63,696,000 |

Supplemental Figure S8

|            |            |            |            |            |            |            |            |
|------------|------------|------------|------------|------------|------------|------------|------------|
| 63,697,000 | 63,698,000 | 63,699,000 | 63,700,000 | 63,701,000 | 63,702,000 | 63,703,000 | 63,704,000 |
| 63,705,000 | 63,706,000 | 63,707,000 | 63,708,000 | 63,709,000 | 63,710,000 | 63,711,000 | 63,712,000 |
| 63,713,000 | 63,714,000 | 63,715,000 | 63,716,000 | 63,717,000 | 63,718,000 | 63,719,000 | 63,720,000 |
| 63,721,000 | 63,722,000 | 63,723,000 | 63,724,000 | 63,725,000 | 63,726,000 | 63,727,000 | 63,728,000 |
| 63,729,000 | 63,730,000 | 63,731,000 | 63,732,000 | 63,733,000 | 63,734,000 | 63,735,000 | 63,736,000 |
| 63,737,000 | 63,738,000 | 63,739,000 | 63,740,000 | 63,741,000 | 63,742,000 | 63,743,000 | 63,744,000 |
| 63,745,000 | 63,746,000 | 63,747,000 | 63,748,000 | 63,749,000 | 63,750,000 | 63,751,000 | 63,752,000 |
| 63,753,000 | 63,754,000 | 63,755,000 | 63,756,000 | 63,757,000 | 63,758,000 | 63,759,000 | 63,760,000 |
| 63,761,000 | 63,762,000 | 63,763,000 | 63,764,000 | 63,765,000 | 63,766,000 | 63,767,000 | 63,768,000 |
| 63,769,000 | 63,770,000 | 63,771,000 | 63,772,000 | 63,773,000 | 63,774,000 | 63,775,000 | 63,776,000 |
| 63,777,000 | 63,778,000 | 63,779,000 | 63,780,000 | 63,781,000 | 63,782,000 | 63,783,000 | 63,784,000 |
| 63,785,000 | 63,786,000 | 63,787,000 | 63,788,000 | 63,789,000 | 63,790,000 | 63,791,000 | 63,792,000 |
| 63,793,000 | 63,794,000 | 63,795,000 | 63,796,000 | 63,797,000 | 63,798,000 | 63,799,000 | 63,800,000 |
| 63,801,000 | 63,802,000 | 63,803,000 | 63,804,000 | 63,805,000 | 63,806,000 | 63,807,000 | 63,808,000 |
| 63,809,000 | 63,810,000 | 63,811,000 | 63,812,000 | 63,813,000 | 63,814,000 | 63,815,000 | 63,816,000 |
| 63,817,000 | 63,818,000 | 63,819,000 | 63,820,000 | 63,821,000 | 63,822,000 | 63,823,000 | 63,824,000 |
| 63,825,000 | 63,826,000 | 63,827,000 | 63,828,000 | 63,829,000 | 63,830,000 | 63,831,000 | 63,832,000 |
| 63,833,000 | 63,834,000 | 63,835,000 | 63,836,000 | 63,837,000 | 63,838,000 | 63,839,000 | 63,840,000 |
| 63,841,000 | 63,842,000 | 63,843,000 | 63,844,000 | 63,845,000 | 63,846,000 | 63,847,000 | 63,848,000 |
| 63,849,000 | 63,850,000 | 63,851,000 | 63,852,000 | 63,853,000 | 63,854,000 | 63,855,000 | 63,856,000 |
| 63,857,000 | 63,858,000 | 63,859,000 | 63,860,000 | 63,861,000 | 63,862,000 | 63,863,000 | 63,864,000 |
| 63,865,000 | 63,866,000 | 63,867,000 | 63,868,000 | 63,869,000 | 63,870,000 | 63,871,000 | 63,872,000 |
| 63,873,000 | 63,874,000 | 63,875,000 | 63,876,000 | 63,877,000 | 63,878,000 | 63,879,000 | 63,880,000 |

Supplemental Figure S8

|            |            |            |            |            |            |            |            |
|------------|------------|------------|------------|------------|------------|------------|------------|
| 63,881,000 | 63,882,000 | 63,883,000 | 63,884,000 | 63,885,000 | 63,886,000 | 63,887,000 | 63,888,000 |
| 63,889,000 | 63,890,000 | 63,891,000 | 63,892,000 | 63,893,000 | 63,894,000 | 63,895,000 | 63,896,000 |
| 63,897,000 | 63,898,000 | 63,899,000 | 63,900,000 | 63,901,000 | 63,902,000 | 63,903,000 | 63,904,000 |
| 63,905,000 | 63,906,000 | 63,907,000 | 63,908,000 | 63,909,000 | 63,910,000 | 63,911,000 | 63,912,000 |
| 63,913,000 | 63,914,000 | 63,915,000 | 63,916,000 | 63,917,000 | 63,918,000 | 63,919,000 | 63,920,000 |
| 63,921,000 | 63,922,000 | 63,923,000 | 63,924,000 | 63,925,000 | 63,926,000 | 63,927,000 | 63,928,000 |
| 63,929,000 | 63,930,000 | 63,931,000 | 63,932,000 | 63,933,000 | 63,934,000 | 63,935,000 | 63,936,000 |
| 63,937,000 | 63,938,000 | 63,939,000 | 63,940,000 | 63,941,000 | 63,942,000 | 63,943,000 | 63,944,000 |
| 63,945,000 | 63,946,000 | 63,947,000 | 63,948,000 | 63,949,000 | 63,950,000 | 63,951,000 | 63,952,000 |
| 63,953,000 | 63,954,000 | 63,955,000 | 63,956,000 | 63,957,000 | 63,958,000 | 63,959,000 | 63,960,000 |
| 63,961,000 | 63,962,000 | 63,963,000 | 63,964,000 | 63,965,000 | 63,966,000 | 63,967,000 | 63,968,000 |
| 63,969,000 | 63,970,000 | 63,971,000 | 63,972,000 | 63,973,000 | 63,974,000 | 63,975,000 | 63,976,000 |
| 63,977,000 | 63,978,000 | 63,979,000 | 63,980,000 | 63,981,000 | 63,982,000 | 63,983,000 | 63,984,000 |
| 63,985,000 | 63,986,000 | 63,987,000 | 63,988,000 | 63,989,000 | 63,990,000 | 63,991,000 | 63,992,000 |
| 63,993,000 | 63,994,000 | 63,995,000 | 63,996,000 | 63,997,000 | 63,998,000 | 63,999,000 | 64,000,000 |
| 64,001,000 | 64,002,000 | 64,003,000 | 64,004,000 | 64,005,000 | 64,006,000 | 64,007,000 | 64,008,000 |
| 64,009,000 | 64,010,000 | 64,011,000 | 64,012,000 | 64,013,000 | 64,014,000 | 64,015,000 | 64,016,000 |
| 64,017,000 | 64,018,000 | 64,019,000 | 64,020,000 | 64,021,000 | 64,022,000 | 64,023,000 | 64,024,000 |
| 64,025,000 | 64,026,000 | 64,027,000 | 64,028,000 | 64,029,000 | 64,030,000 | 64,031,000 | 64,032,000 |
| 64,033,000 | 64,034,000 | 64,035,000 | 64,036,000 | 64,037,000 | 64,038,000 | 64,039,000 | 64,040,000 |
| 64,041,000 | 64,042,000 | 64,043,000 | 64,044,000 | 64,045,000 | 64,046,000 | 64,047,000 | 64,048,000 |
| 64,049,000 | 64,050,000 | 64,051,000 | 64,052,000 | 64,053,000 | 64,054,000 | 64,055,000 | 64,056,000 |
| 64,057,000 | 64,058,000 | 64,059,000 | 64,060,000 | 64,061,000 | 64,062,000 | 64,063,000 | 64,064,000 |

Supplemental Figure S8

|            |            |            |            |            |            |            |            |
|------------|------------|------------|------------|------------|------------|------------|------------|
| 64,065,000 | 64,066,000 | 64,067,000 | 64,068,000 | 64,069,000 | 64,070,000 | 64,071,000 | 64,072,000 |
| 64,073,000 | 64,074,000 | 64,075,000 | 64,076,000 | 64,077,000 | 64,078,000 | 64,079,000 | 64,080,000 |
| 64,081,000 | 64,082,000 | 64,083,000 | 64,084,000 | 64,085,000 | 64,086,000 | 64,087,000 | 64,088,000 |
| 64,089,000 | 64,090,000 | 64,091,000 | 64,092,000 | 64,093,000 | 64,094,000 | 64,095,000 | 64,096,000 |
| 64,097,000 | 64,098,000 | 64,099,000 | 64,100,000 | 64,101,000 | 64,102,000 | 64,103,000 | 64,104,000 |
| 64,105,000 | 64,106,000 | 64,107,000 | 64,108,000 | 64,109,000 | 64,110,000 | 64,111,000 | 64,112,000 |
| 64,113,000 | 64,114,000 | 64,115,000 | 64,116,000 | 64,117,000 | 64,118,000 | 64,119,000 | 64,120,000 |
| 64,121,000 | 64,122,000 | 64,123,000 | 64,124,000 | 64,125,000 | 64,126,000 | 64,127,000 | 64,128,000 |
| 64,129,000 | 64,130,000 | 64,131,000 | 64,132,000 | 64,133,000 | 64,134,000 | 64,135,000 | 64,136,000 |
| 64,137,000 | 64,138,000 | 64,139,000 | 64,140,000 | 64,141,000 | 64,142,000 | 64,143,000 | 64,144,000 |
| 64,145,000 | 64,146,000 | 64,147,000 | 64,148,000 | 64,149,000 | 64,150,000 | 64,151,000 | 64,152,000 |
| 64,153,000 | 64,154,000 | 64,155,000 | 64,156,000 | 64,157,000 | 64,158,000 | 64,159,000 | 64,160,000 |
| 64,161,000 | 64,162,000 | 64,163,000 | 64,164,000 | 64,165,000 | 64,166,000 | 64,167,000 | 64,168,000 |
| 64,169,000 | 64,170,000 | 64,171,000 | 64,172,000 | 64,173,000 | 64,174,000 | 64,175,000 | 64,176,000 |
| 64,177,000 | 64,178,000 | 64,179,000 | 64,180,000 | 64,181,000 | 64,182,000 | 64,183,000 | 64,184,000 |
| 64,185,000 | 64,186,000 | 64,187,000 | 64,188,000 | 64,189,000 | 64,190,000 | 64,191,000 | 64,192,000 |
| 64,193,000 | 64,194,000 | 64,195,000 | 64,196,000 | 64,197,000 | 64,198,000 | 64,199,000 | 64,200,000 |
| 64,201,000 | 64,202,000 | 64,203,000 | 64,204,000 | 64,205,000 | 64,206,000 | 64,207,000 | 64,208,000 |
| 64,209,000 | 64,210,000 | 64,211,000 | 64,212,000 | 64,213,000 | 64,214,000 | 64,215,000 | 64,216,000 |
| 64,217,000 | 64,218,000 | 64,219,000 | 64,220,000 | 64,221,000 | 64,222,000 | 64,223,000 | 64,224,000 |
| 64,225,000 | 64,226,000 | 64,227,000 | 64,228,000 | 64,229,000 | 64,230,000 | 64,231,000 | 64,232,000 |
| 64,233,000 | 64,234,000 | 64,235,000 | 64,236,000 | 64,237,000 | 64,238,000 | 64,239,000 | 64,240,000 |
| 64,241,000 | 64,242,000 | 64,243,000 | 64,244,000 | 64,245,000 | 64,246,000 | 64,247,000 | 64,248,000 |

Supplemental Figure S8

|            |            |            |            |            |            |            |            |
|------------|------------|------------|------------|------------|------------|------------|------------|
| 64,249,000 | 64,250,000 | 64,251,000 | 64,252,000 | 64,253,000 | 64,254,000 | 64,255,000 | 64,256,000 |
| 64,257,000 | 64,258,000 | 64,259,000 | 64,260,000 | 64,261,000 | 64,262,000 | 64,263,000 | 64,264,000 |
| 64,265,000 | 64,266,000 | 64,267,000 | 64,268,000 | 64,269,000 | 64,270,000 | 64,271,000 | 64,272,000 |
| 64,273,000 | 64,274,000 | 64,275,000 | 64,276,000 | 64,277,000 | 64,278,000 | 64,279,000 | 64,280,000 |
| 64,281,000 | 64,282,000 | 64,283,000 | 64,284,000 | 64,285,000 | 64,286,000 | 64,287,000 | 64,288,000 |
| 64,289,000 | 64,290,000 | 64,291,000 | 64,292,000 | 64,293,000 | 64,294,000 | 64,295,000 | 64,296,000 |
| 64,297,000 | 64,298,000 | 64,299,000 | 64,300,000 | 64,301,000 | 64,302,000 | 64,303,000 | 64,304,000 |
| 64,305,000 | 64,306,000 | 64,307,000 | 64,308,000 | 64,309,000 | 64,310,000 | 64,311,000 | 64,312,000 |
| 64,313,000 | 64,314,000 | 64,315,000 | 64,316,000 | 64,317,000 | 64,318,000 | 64,319,000 | 64,320,000 |
| 64,321,000 | 64,322,000 | 64,323,000 | 64,324,000 | 64,325,000 | 64,326,000 | 64,327,000 | 64,328,000 |
| 64,329,000 | 64,330,000 | 64,331,000 | 64,332,000 | 64,333,000 | 64,334,000 | 64,335,000 | 64,336,000 |
| 64,337,000 | 64,338,000 | 64,339,000 | 64,340,000 | 64,341,000 | 64,342,000 | 64,343,000 | 64,344,000 |
| 64,345,000 | 64,346,000 | 64,347,000 | 64,348,000 | 64,349,000 | 64,350,000 | 64,351,000 | 64,352,000 |
| 64,353,000 | 64,354,000 | 64,355,000 | 64,356,000 | 64,357,000 | 64,358,000 | 64,359,000 | 64,360,000 |
| 64,361,000 | 64,362,000 | 64,363,000 | 64,364,000 | 64,365,000 | 64,366,000 | 64,367,000 | 64,368,000 |
| 64,369,000 | 64,370,000 | 64,371,000 | 64,372,000 | 64,373,000 | 64,374,000 | 64,375,000 | 64,376,000 |
| 64,377,000 | 64,378,000 | 64,379,000 | 64,380,000 | 64,381,000 | 64,382,000 | 64,383,000 | 64,384,000 |
| 64,385,000 | 64,386,000 | 64,387,000 | 64,388,000 | 64,389,000 | 64,390,000 | 64,391,000 | 64,392,000 |
| 64,393,000 | 64,394,000 | 64,395,000 | 64,396,000 | 64,397,000 | 64,398,000 | 64,399,000 | 64,400,000 |
| 64,401,000 | 64,402,000 | 64,403,000 | 64,404,000 | 64,405,000 | 64,406,000 | 64,407,000 | 64,408,000 |
| 64,409,000 | 64,410,000 | 64,411,000 | 64,412,000 | 64,413,000 | 64,414,000 | 64,415,000 | 64,416,000 |
| 64,417,000 | 64,418,000 | 64,419,000 | 64,420,000 | 64,421,000 | 64,422,000 | 64,423,000 | 64,424,000 |
| 64,425,000 | 64,426,000 | 64,427,000 | 64,428,000 | 64,429,000 | 64,430,000 | 64,431,000 | 64,432,000 |

Supplemental Figure S8

|            |            |            |            |            |            |            |            |
|------------|------------|------------|------------|------------|------------|------------|------------|
| 64,433,000 | 64,434,000 | 64,435,000 | 64,436,000 | 64,437,000 | 64,438,000 | 64,439,000 | 64,440,000 |
| 64,441,000 | 64,442,000 | 64,443,000 | 64,444,000 | 64,445,000 | 64,446,000 | 64,447,000 | 64,448,000 |
| 64,449,000 | 64,450,000 | 64,451,000 | 64,452,000 | 64,453,000 | 64,454,000 | 64,455,000 | 64,456,000 |
| 64,457,000 | 64,458,000 | 64,459,000 | 64,460,000 | 64,461,000 | 64,462,000 | 64,463,000 | 64,464,000 |
| 64,465,000 | 64,466,000 | 64,467,000 | 64,468,000 | 64,469,000 | 64,470,000 | 64,471,000 | 64,472,000 |
| 64,473,000 | 64,474,000 | 64,475,000 | 64,476,000 | 64,477,000 | 64,478,000 | 64,479,000 | 64,480,000 |
| 64,481,000 | 64,482,000 | 64,483,000 | 64,484,000 | 64,485,000 | 64,486,000 | 64,487,000 | 64,488,000 |
| 64,489,000 | 64,490,000 | 64,491,000 | 64,492,000 | 64,493,000 | 64,494,000 | 64,495,000 | 64,496,000 |
| 64,497,000 | 64,498,000 | 64,499,000 | 64,500,000 | 64,501,000 | 64,502,000 | 64,503,000 | 64,504,000 |
| 64,505,000 | 64,506,000 | 64,507,000 | 64,508,000 | 64,509,000 | 64,510,000 | 64,511,000 | 64,512,000 |
| 64,513,000 | 64,514,000 | 64,515,000 | 64,516,000 | 64,517,000 | 64,518,000 | 64,519,000 | 64,520,000 |
| 64,521,000 | 64,522,000 | 64,523,000 | 64,524,000 | 64,525,000 | 64,526,000 | 64,527,000 | 64,528,000 |
| 64,529,000 | 64,530,000 | 64,531,000 | 64,532,000 | 64,533,000 | 64,534,000 | 64,535,000 | 64,536,000 |
| 64,537,000 | 64,538,000 | 64,539,000 | 64,540,000 | 64,541,000 | 64,542,000 | 64,543,000 | 64,544,000 |
| 64,545,000 | 64,546,000 | 64,547,000 | 64,548,000 | 64,549,000 | 64,550,000 | 64,551,000 | 64,552,000 |
| 64,553,000 | 64,554,000 | 64,555,000 | 64,556,000 | 64,557,000 | 64,558,000 | 64,559,000 | 64,560,000 |
| 64,561,000 | 64,562,000 | 64,563,000 | 64,564,000 | 64,565,000 | 64,566,000 | 64,567,000 | 64,568,000 |
| 64,569,000 | 64,570,000 | 64,571,000 | 64,572,000 | 64,573,000 | 64,574,000 | 64,575,000 | 64,576,000 |
| 64,577,000 | 64,578,000 | 64,579,000 | 64,580,000 | 64,581,000 | 64,582,000 | 64,583,000 | 64,584,000 |
| 64,585,000 | 64,586,000 | 64,587,000 | 64,588,000 | 64,589,000 | 64,590,000 | 64,591,000 | 64,592,000 |
| 64,593,000 | 64,594,000 | 64,595,000 | 64,596,000 | 64,597,000 | 64,598,000 | 64,599,000 | 64,600,000 |
| 64,601,000 | 64,602,000 | 64,603,000 | 64,604,000 | 64,605,000 | 64,606,000 | 64,607,000 | 64,608,000 |
| 64,609,000 | 64,610,000 | 64,611,000 | 64,612,000 | 64,613,000 | 64,614,000 | 64,615,000 | 64,616,000 |

NE  


Supplemental Figure S8

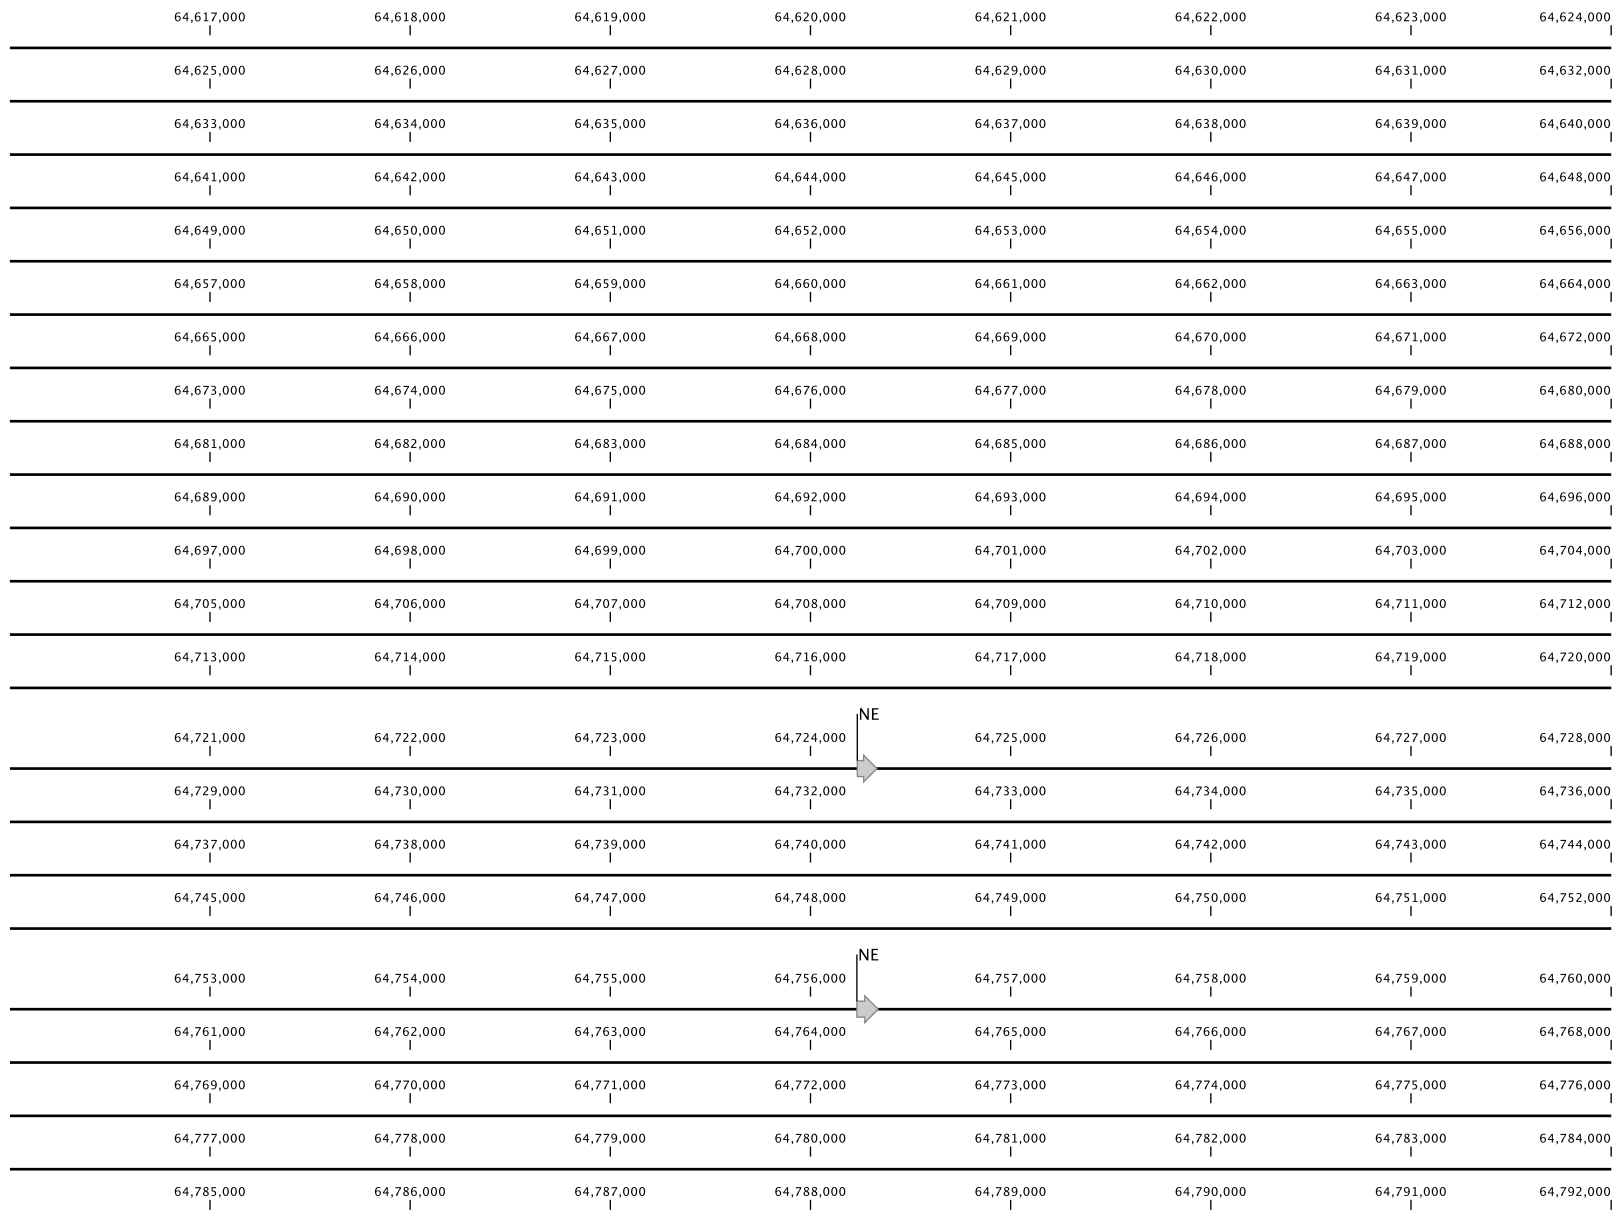

Supplemental Figure S8

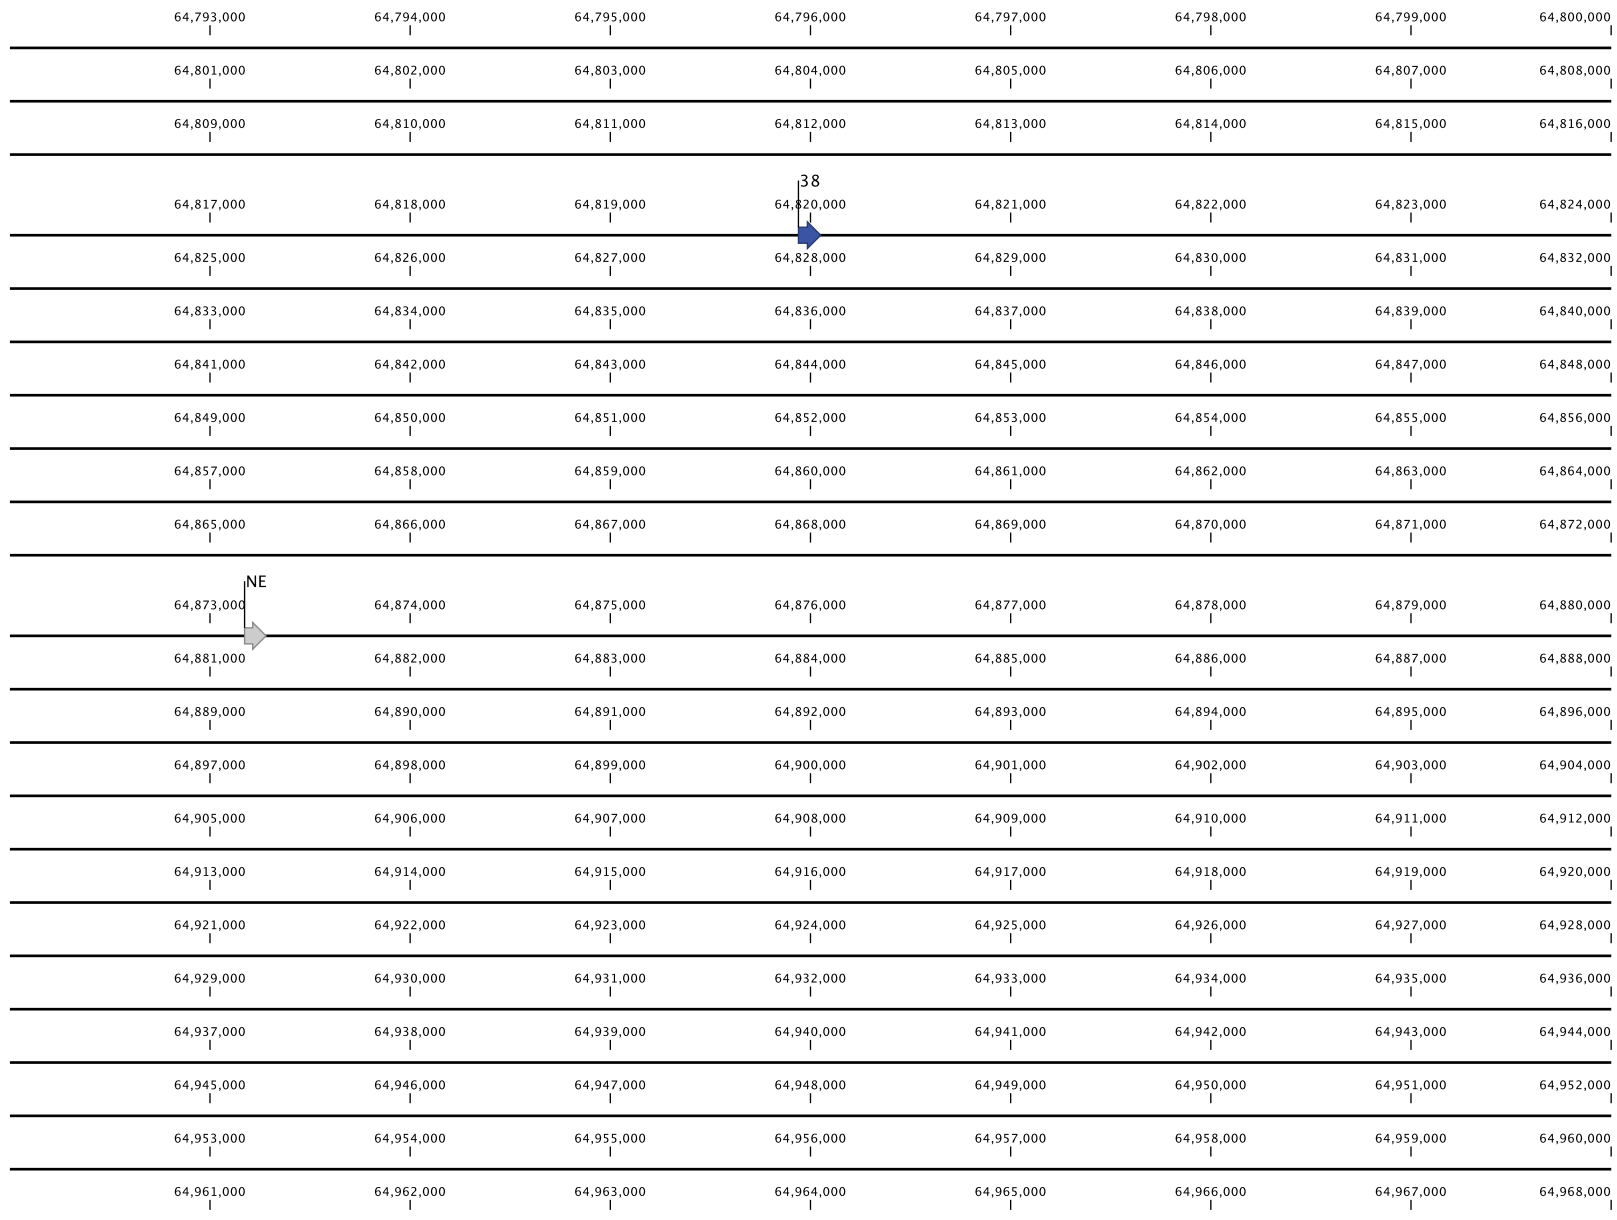



Supplemental Figure S8

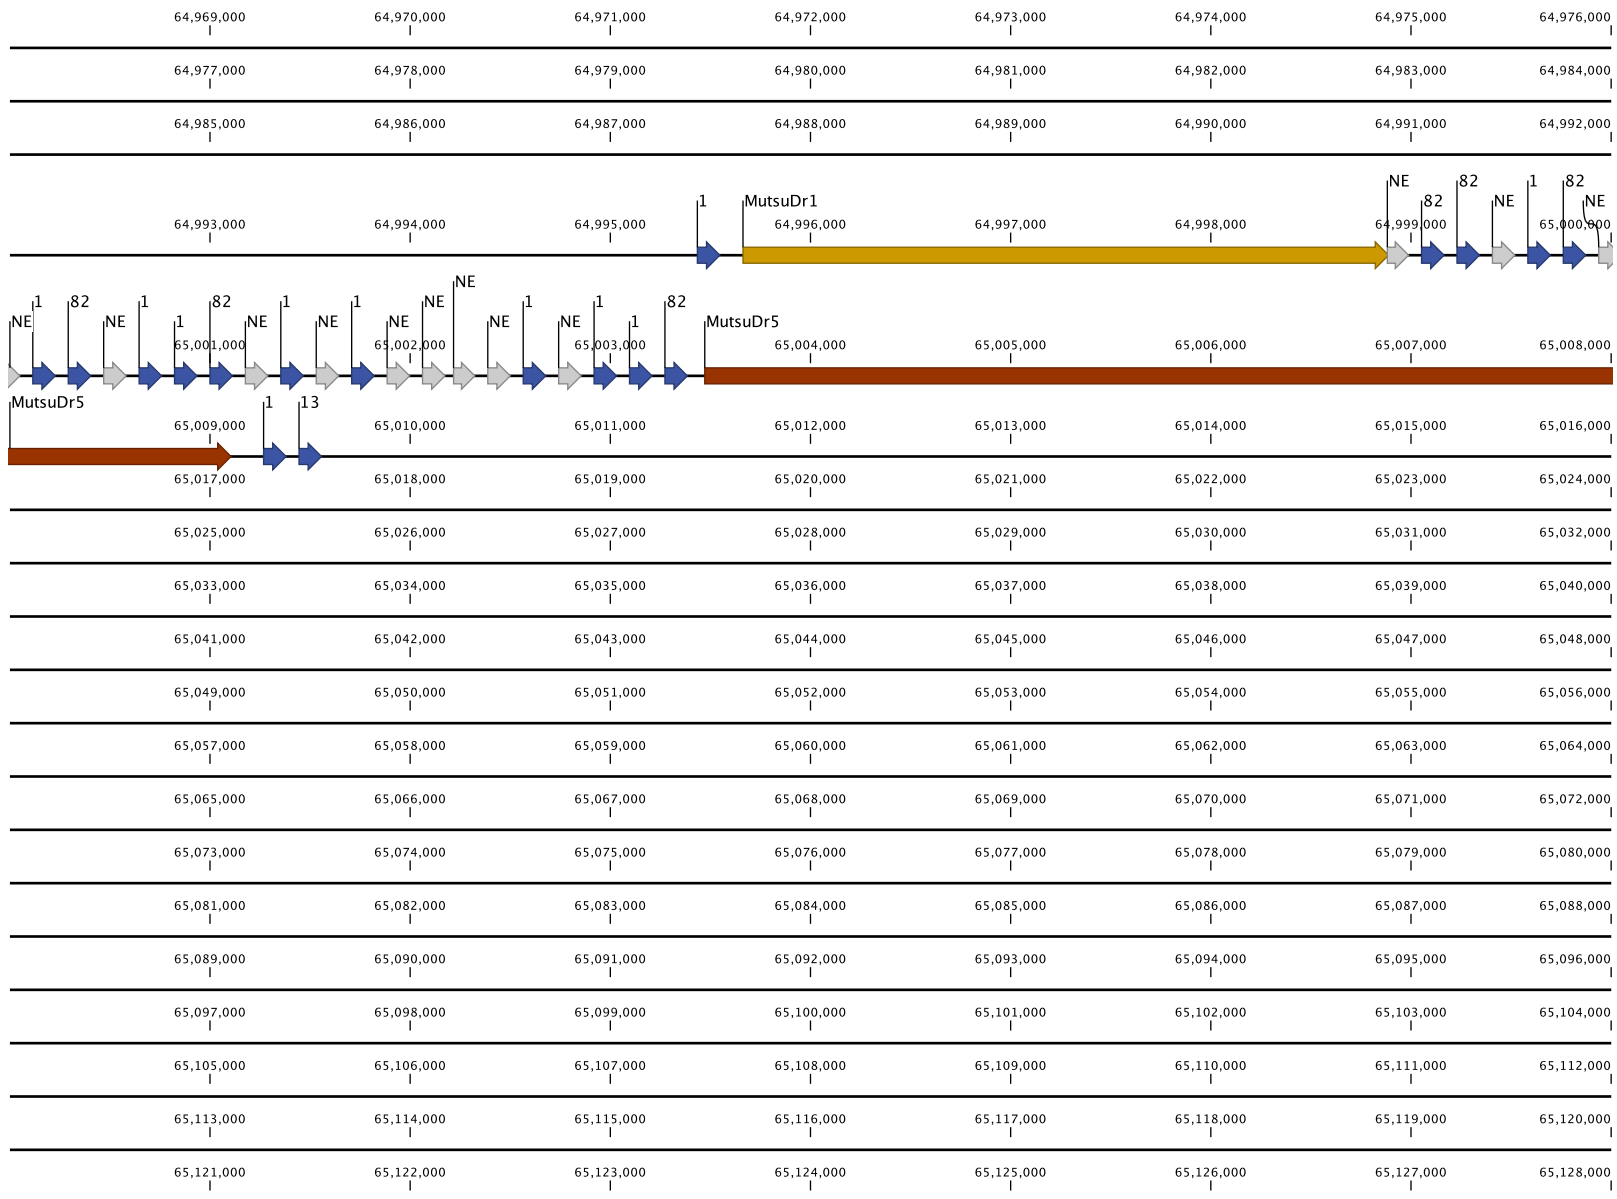

Supplemental Figure S8

|            |            |            |            |            |            |            |            |
|------------|------------|------------|------------|------------|------------|------------|------------|
| 65,129,000 | 65,130,000 | 65,131,000 | 65,132,000 | 65,133,000 | 65,134,000 | 65,135,000 | 65,136,000 |
| 65,137,000 | 65,138,000 | 65,139,000 | 65,140,000 | 65,141,000 | 65,142,000 | 65,143,000 | 65,144,000 |
| 65,145,000 | 65,146,000 | 65,147,000 | 65,148,000 | 65,149,000 | 65,150,000 | 65,151,000 | 65,152,000 |
| 65,153,000 | 65,154,000 | 65,155,000 | 65,156,000 | 65,157,000 | 65,158,000 | 65,159,000 | 65,160,000 |
| 65,161,000 | 65,162,000 | 65,163,000 | 65,164,000 | 65,165,000 | 65,166,000 | 65,167,000 | 65,168,000 |
| 65,169,000 | 65,170,000 | 65,171,000 | 65,172,000 | 65,173,000 | 65,174,000 | 65,175,000 | 65,176,000 |
| 65,177,000 | 65,178,000 | 65,179,000 | 65,180,000 | 65,181,000 | 65,182,000 | 65,183,000 | 65,184,000 |
| 65,185,000 | 65,186,000 | 65,187,000 | 65,188,000 | 65,189,000 | 65,190,000 | 65,191,000 | 65,192,000 |
| 65,193,000 | 65,194,000 | 65,195,000 | 65,196,000 | 65,197,000 | 65,198,000 | 65,199,000 | 65,200,000 |
| 65,201,000 | 65,202,000 | 65,203,000 | 65,204,000 | 65,205,000 | 65,206,000 | 65,207,000 | 65,208,000 |
| 65,209,000 | 65,210,000 | 65,211,000 | 65,212,000 | 65,213,000 | 65,214,000 | 65,215,000 | 65,216,000 |
| 65,217,000 | 65,218,000 | 65,219,000 | 65,220,000 | 65,221,000 | 65,222,000 | 65,223,000 | 65,224,000 |
| 65,225,000 | 65,226,000 | 65,227,000 | 65,228,000 | 65,229,000 | 65,230,000 | 65,231,000 | 65,232,000 |
| 65,233,000 | 65,234,000 | 65,235,000 | 65,236,000 | 65,237,000 | 65,238,000 | 65,239,000 | 65,240,000 |
| 65,241,000 | 65,242,000 | 65,243,000 | 65,244,000 | 65,245,000 | 65,246,000 | 65,247,000 | 65,248,000 |
| 65,249,000 | 65,250,000 | 65,251,000 | 65,252,000 | 65,253,000 | 65,254,000 | 65,255,000 | 65,256,000 |
| 65,257,000 | 65,258,000 | 65,259,000 | 65,260,000 | 65,261,000 | 65,262,000 | 65,263,000 | 65,264,000 |
| 65,265,000 | 65,266,000 | 65,267,000 | 65,268,000 | 65,269,000 | 65,270,000 | 65,271,000 | 65,272,000 |
| 65,273,000 | 65,274,000 | 65,275,000 | 65,276,000 | 65,277,000 | 65,278,000 | 65,279,000 | 65,280,000 |
| 65,281,000 | 65,282,000 | 65,283,000 | 65,284,000 | 65,285,000 | 65,286,000 | 65,287,000 | 65,288,000 |
| 65,289,000 | 65,290,000 | 65,291,000 | 65,292,000 | 65,293,000 | 65,294,000 | 65,295,000 | 65,296,000 |
| 65,297,000 | 65,298,000 | 65,299,000 | 65,300,000 | 65,301,000 | 65,302,000 | 65,303,000 | 65,304,000 |
| 65,305,000 | 65,306,000 | 65,307,000 | 65,308,000 | 65,309,000 | 65,310,000 | 65,311,000 | 65,312,000 |

NE

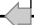

Supplemental Figure S8

|            |            |            |            |            |            |            |            |
|------------|------------|------------|------------|------------|------------|------------|------------|
| 65,313,000 | 65,314,000 | 65,315,000 | 65,316,000 | 65,317,000 | 65,318,000 | 65,319,000 | 65,320,000 |
| 65,321,000 | 65,322,000 | 65,323,000 | 65,324,000 | 65,325,000 | 65,326,000 | 65,327,000 | 65,328,000 |
| 65,329,000 | 65,330,000 | 65,331,000 | 65,332,000 | 65,333,000 | 65,334,000 | 65,335,000 | 65,336,000 |
| 65,337,000 | 65,338,000 | 65,339,000 | 65,340,000 | 65,341,000 | 65,342,000 | 65,343,000 | 65,344,000 |
| 65,345,000 | 65,346,000 | 65,347,000 | 65,348,000 | 65,349,000 | 65,350,000 | 65,351,000 | 65,352,000 |
| 65,353,000 | 65,354,000 | 65,355,000 | 65,356,000 | 65,357,000 | 65,358,000 | 65,359,000 | 65,360,000 |
| 65,361,000 | 65,362,000 | 65,363,000 | 65,364,000 | 65,365,000 | 65,366,000 | 65,367,000 | 65,368,000 |
| 65,369,000 | 65,370,000 | 65,371,000 | 65,372,000 | 65,373,000 | 65,374,000 | 65,375,000 | 65,376,000 |
| 65,377,000 | 65,378,000 | 65,379,000 | 65,380,000 | 65,381,000 | 65,382,000 | 65,383,000 | 65,384,000 |
| 65,385,000 | 65,386,000 | 65,387,000 | 65,388,000 | 65,389,000 | 65,390,000 | 65,391,000 | 65,392,000 |
| 65,393,000 | 65,394,000 | 65,395,000 | 65,396,000 | 65,397,000 | 65,398,000 | 65,399,000 | 65,400,000 |
| 65,401,000 | 65,402,000 | 65,403,000 | 65,404,000 | 65,405,000 | 65,406,000 | 65,407,000 | 65,408,000 |
| 65,409,000 | 65,410,000 | 65,411,000 | 65,412,000 | 65,413,000 | 65,414,000 | 65,415,000 | 65,416,000 |
| 65,417,000 | 65,418,000 | 65,419,000 | 65,420,000 | 65,421,000 | 65,422,000 | 65,423,000 | 65,424,000 |
| 65,425,000 | 65,426,000 | 65,427,000 | 65,428,000 | 65,429,000 | 65,430,000 | 65,431,000 | 65,432,000 |
| 65,433,000 | 65,434,000 | 65,435,000 | 65,436,000 | 65,437,000 | 65,438,000 | 65,439,000 | 65,440,000 |
| 65,441,000 | 65,442,000 | 65,443,000 | 65,444,000 | 65,445,000 | 65,446,000 | 65,447,000 | 65,448,000 |
| 65,449,000 | 65,450,000 | 65,451,000 | 65,452,000 | 65,453,000 | 65,454,000 | 65,455,000 | 65,456,000 |
| 65,457,000 | 65,458,000 | 65,459,000 | 65,460,000 | 65,461,000 | 65,462,000 | 65,463,000 | 65,464,000 |
| 65,465,000 | 65,466,000 | 65,467,000 | 65,468,000 | 65,469,000 | 65,470,000 | 65,471,000 | 65,472,000 |
| 65,473,000 | 65,474,000 | 65,475,000 | 65,476,000 | 65,477,000 | 65,478,000 | 65,479,000 | 65,480,000 |
| 65,481,000 | 65,482,000 | 65,483,000 | 65,484,000 | 65,485,000 | 65,486,000 | 65,487,000 | 65,488,000 |
| 65,489,000 | 65,490,000 | 65,491,000 | 65,492,000 | 65,493,000 | 65,494,000 | 65,495,000 | 65,496,000 |

Supplemental Figure S8

|            |            |            |            |            |            |            |            |
|------------|------------|------------|------------|------------|------------|------------|------------|
| 65,497,000 | 65,498,000 | 65,499,000 | 65,500,000 | 65,501,000 | 65,502,000 | 65,503,000 | 65,504,000 |
| 65,505,000 | 65,506,000 | 65,507,000 | 65,508,000 | 65,509,000 | 65,510,000 | 65,511,000 | 65,512,000 |
| 65,513,000 | 65,514,000 | 65,515,000 | 65,516,000 | 65,517,000 | 65,518,000 | 65,519,000 | 65,520,000 |
| 65,521,000 | 65,522,000 | 65,523,000 | 65,524,000 | 65,525,000 | 65,526,000 | 65,527,000 | 65,528,000 |
| 65,529,000 | 65,530,000 | 65,531,000 | 65,532,000 | 65,533,000 | 65,534,000 | 65,535,000 | 65,536,000 |
| 65,537,000 | 65,538,000 | 65,539,000 | 65,540,000 | 65,541,000 | 65,542,000 | 65,543,000 | 65,544,000 |
| 65,545,000 | 65,546,000 | 65,547,000 | 65,548,000 | 65,549,000 | 65,550,000 | 65,551,000 | 65,552,000 |
| 65,553,000 | 65,554,000 | 65,555,000 | 65,556,000 | 65,557,000 | 65,558,000 | 65,559,000 | 65,560,000 |
| 65,561,000 | 65,562,000 | 65,563,000 | 65,564,000 | 65,565,000 | 65,566,000 | 65,567,000 | 65,568,000 |
| 65,569,000 | 65,570,000 | 65,571,000 | 65,572,000 | 65,573,000 | 65,574,000 | 65,575,000 | 65,576,000 |
| 65,577,000 | 65,578,000 | 65,579,000 | 65,580,000 | 65,581,000 | 65,582,000 | 65,583,000 | 65,584,000 |
| 65,585,000 | 65,586,000 | 65,587,000 | 65,588,000 | 65,589,000 | 65,590,000 | 65,591,000 | 65,592,000 |
| 65,593,000 | 65,594,000 | 65,595,000 | 65,596,000 | 65,597,000 | 65,598,000 | 65,599,000 | 65,600,000 |
| 65,601,000 | 65,602,000 | 65,603,000 | 65,604,000 | 65,605,000 | 65,606,000 | 65,607,000 | 65,608,000 |
| 65,609,000 | 65,610,000 | 65,611,000 | 65,612,000 | 65,613,000 | 65,614,000 | 65,615,000 | 65,616,000 |
| 65,617,000 | 65,618,000 | 65,619,000 | 65,620,000 | 65,621,000 | 65,622,000 | 65,623,000 | 65,624,000 |
| 65,625,000 | 65,626,000 | 65,627,000 | 65,628,000 | 65,629,000 | 65,630,000 | 65,631,000 | 65,632,000 |
| 65,633,000 | 65,634,000 | 65,635,000 | 65,636,000 | 65,637,000 | 65,638,000 | 65,639,000 | 65,640,000 |
| 65,641,000 | 65,642,000 | 65,643,000 | 65,644,000 | 65,645,000 | 65,646,000 | 65,647,000 | 65,648,000 |
| 65,649,000 | 65,650,000 | 65,651,000 | 65,652,000 | 65,653,000 | 65,654,000 | 65,655,000 | 65,656,000 |
| 65,657,000 | 65,658,000 | 65,659,000 | 65,660,000 | 65,661,000 | 65,662,000 | 65,663,000 | 65,664,000 |
| 65,665,000 | 65,666,000 | 65,667,000 | 65,668,000 | 65,669,000 | 65,670,000 | 65,671,000 | 65,672,000 |
| 65,673,000 | 65,674,000 | 65,675,000 | 65,676,000 | 65,677,000 | 65,678,000 | 65,679,000 | 65,680,000 |

Supplemental Figure S8

|            |            |            |            |            |            |            |            |
|------------|------------|------------|------------|------------|------------|------------|------------|
| 65,681,000 | 65,682,000 | 65,683,000 | 65,684,000 | 65,685,000 | 65,686,000 | 65,687,000 | 65,688,000 |
| 65,689,000 | 65,690,000 | 65,691,000 | 65,692,000 | 65,693,000 | 65,694,000 | 65,695,000 | 65,696,000 |
| 65,697,000 | 65,698,000 | 65,699,000 | 65,700,000 | 65,701,000 | 65,702,000 | 65,703,000 | 65,704,000 |
| 65,705,000 | 65,706,000 | 65,707,000 | 65,708,000 | 65,709,000 | 65,710,000 | 65,711,000 | 65,712,000 |
| 65,713,000 | 65,714,000 | 65,715,000 | 65,716,000 | 65,717,000 | 65,718,000 | 65,719,000 | 65,720,000 |
| 65,721,000 | 65,722,000 | 65,723,000 | 65,724,000 | 65,725,000 | 65,726,000 | 65,727,000 | 65,728,000 |
| 65,729,000 | 65,730,000 | 65,731,000 | 65,732,000 | 65,733,000 | 65,734,000 | 65,735,000 | 65,736,000 |
| 65,737,000 | 65,738,000 | 65,739,000 | 65,740,000 | 65,741,000 | 65,742,000 | 65,743,000 | 65,744,000 |
| 65,745,000 | 65,746,000 | 65,747,000 | 65,748,000 | 65,749,000 | 65,750,000 | 65,751,000 | 65,752,000 |
| 65,753,000 | 65,754,000 | 65,755,000 | 65,756,000 | 65,757,000 | 65,758,000 | 65,759,000 | 65,760,000 |
| 65,761,000 | 65,762,000 | 65,763,000 | 65,764,000 | 65,765,000 | 65,766,000 | 65,767,000 | 65,768,000 |
| 65,769,000 | 65,770,000 | 65,771,000 | 65,772,000 | 65,773,000 | 65,774,000 | 65,775,000 | 65,776,000 |
| 65,777,000 | 65,778,000 | 65,779,000 | 65,780,000 | 65,781,000 | 65,782,000 | 65,783,000 | 65,784,000 |
| 65,785,000 | 65,786,000 | 65,787,000 | 65,788,000 | 65,789,000 | 65,790,000 | 65,791,000 | 65,792,000 |
| 65,793,000 | 65,794,000 | 65,795,000 | 65,796,000 | 65,797,000 | 65,798,000 | 65,799,000 | 65,800,000 |
| 65,801,000 | 65,802,000 | 65,803,000 | 65,804,000 | 65,805,000 | 65,806,000 | 65,807,000 | 65,808,000 |
| 65,809,000 | 65,810,000 | 65,811,000 | 65,812,000 | 65,813,000 | 65,814,000 | 65,815,000 | 65,816,000 |
| 65,817,000 | 65,818,000 | 65,819,000 | 65,820,000 | 65,821,000 | 65,822,000 | 65,823,000 | 65,824,000 |
| 65,825,000 | 65,826,000 | 65,827,000 | 65,828,000 | 65,829,000 | 65,830,000 | 65,831,000 | 65,832,000 |
| 65,833,000 | 65,834,000 | 65,835,000 | 65,836,000 | 65,837,000 | 65,838,000 | 65,839,000 | 65,840,000 |
| 65,841,000 | 65,842,000 | 65,843,000 | 65,844,000 | 65,845,000 | 65,846,000 | 65,847,000 | 65,848,000 |
| 65,849,000 | 65,850,000 | 65,851,000 | 65,852,000 | 65,853,000 | 65,854,000 | 65,855,000 | 65,856,000 |
| 65,857,000 | 65,858,000 | 65,859,000 | 65,860,000 | 65,861,000 | 65,862,000 | 65,863,000 | 65,864,000 |

NE

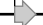

Supplemental Figure S8

|            |            |            |            |            |            |            |            |
|------------|------------|------------|------------|------------|------------|------------|------------|
| 65,865,000 | 65,866,000 | 65,867,000 | 65,868,000 | 65,869,000 | 65,870,000 | 65,871,000 | 65,872,000 |
| 65,873,000 | 65,874,000 | 65,875,000 | 65,876,000 | 65,877,000 | 65,878,000 | 65,879,000 | 65,880,000 |
| 65,881,000 | 65,882,000 | 65,883,000 | 65,884,000 | 65,885,000 | 65,886,000 | 65,887,000 | 65,888,000 |
| 65,889,000 | 65,890,000 | 65,891,000 | 65,892,000 | 65,893,000 | 65,894,000 | 65,895,000 | 65,896,000 |
| 65,897,000 | 65,898,000 | 65,899,000 | 65,900,000 | 65,901,000 | 65,902,000 | 65,903,000 | 65,904,000 |
| 65,905,000 | 65,906,000 | 65,907,000 | 65,908,000 | 65,909,000 | 65,910,000 | 65,911,000 | 65,912,000 |
| 65,913,000 | 65,914,000 | 65,915,000 | 65,916,000 | 65,917,000 | 65,918,000 | 65,919,000 | 65,920,000 |
| 65,921,000 | 65,922,000 | 65,923,000 | 65,924,000 | 65,925,000 | 65,926,000 | 65,927,000 | 65,928,000 |
| 65,929,000 | 65,930,000 | 65,931,000 | 65,932,000 | 65,933,000 | 65,934,000 | 65,935,000 | 65,936,000 |
| 65,937,000 | 65,938,000 | 65,939,000 | 65,940,000 | 65,941,000 | 65,942,000 | 65,943,000 | 65,944,000 |
| 65,945,000 | 65,946,000 | 65,947,000 | 65,948,000 | 65,949,000 | 65,950,000 | 65,951,000 | 65,952,000 |
| 65,953,000 | 65,954,000 | 65,955,000 | 65,956,000 | 65,957,000 | 65,958,000 | 65,959,000 | 65,960,000 |
| 65,961,000 | 65,962,000 | 65,963,000 | 65,964,000 | 65,965,000 | 65,966,000 | 65,967,000 | 65,968,000 |
| 65,969,000 | 65,970,000 | 65,971,000 | 65,972,000 | 65,973,000 | 65,974,000 | 65,975,000 | 65,976,000 |
| 65,977,000 | 65,978,000 | 65,979,000 | 65,980,000 | 65,981,000 | 65,982,000 | 65,983,000 | 65,984,000 |
| 65,985,000 | 65,986,000 | 65,987,000 | 65,988,000 | 65,989,000 | 65,990,000 | 65,991,000 | 65,992,000 |
| 65,993,000 | 65,994,000 | 65,995,000 | 65,996,000 | 65,997,000 | 65,998,000 | 65,999,000 | 66,000,000 |
| 66,001,000 | 66,002,000 | 66,003,000 | 66,004,000 | 66,005,000 | 66,006,000 | 66,007,000 | 66,008,000 |
| 66,009,000 | 66,010,000 | 66,011,000 | 66,012,000 | 66,013,000 | 66,014,000 | 66,015,000 | 66,016,000 |
| 66,017,000 | 66,018,000 | 66,019,000 | 66,020,000 | 66,021,000 | 66,022,000 | 66,023,000 | 66,024,000 |
| 66,025,000 | 66,026,000 | 66,027,000 | 66,028,000 | 66,029,000 | 66,030,000 | 66,031,000 | 66,032,000 |
| 66,033,000 | 66,034,000 | 66,035,000 | 66,036,000 | 66,037,000 | 66,038,000 | 66,039,000 | 66,040,000 |
| 66,041,000 | 66,042,000 | 66,043,000 | 66,044,000 | 66,045,000 | 66,046,000 | 66,047,000 | 66,048,000 |

Supplemental Figure S8

|            |            |            |            |            |            |            |            |
|------------|------------|------------|------------|------------|------------|------------|------------|
| 66,049,000 | 66,050,000 | 66,051,000 | 66,052,000 | 66,053,000 | 66,054,000 | 66,055,000 | 66,056,000 |
| 66,057,000 | 66,058,000 | 66,059,000 | 66,060,000 | 66,061,000 | 66,062,000 | 66,063,000 | 66,064,000 |
| 66,065,000 | 66,066,000 | 66,067,000 | 66,068,000 | 66,069,000 | 66,070,000 | 66,071,000 | 66,072,000 |
| 66,073,000 | 66,074,000 | 66,075,000 | 66,076,000 | 66,077,000 | 66,078,000 | 66,079,000 | 66,080,000 |
| 66,081,000 | 66,082,000 | 66,083,000 | 66,084,000 | 66,085,000 | 66,086,000 | 66,087,000 | 66,088,000 |
| 66,089,000 | 66,090,000 | 66,091,000 | 66,092,000 | 66,093,000 | 66,094,000 | 66,095,000 | 66,096,000 |
| 66,097,000 | 66,098,000 | 66,099,000 | 66,100,000 | 66,101,000 | 66,102,000 | 66,103,000 | 66,104,000 |
| 66,105,000 | 66,106,000 | 66,107,000 | 66,108,000 | 66,109,000 | 66,110,000 | 66,111,000 | 66,112,000 |
| 66,113,000 | 66,114,000 | 66,115,000 | 66,116,000 | 66,117,000 | 66,118,000 | 66,119,000 | 66,120,000 |
| 66,121,000 | 66,122,000 | 66,123,000 | 66,124,000 | 66,125,000 | 66,126,000 | 66,127,000 | 66,128,000 |
| 66,129,000 | 66,130,000 | 66,131,000 | 66,132,000 | 66,133,000 | 66,134,000 | 66,135,000 | 66,136,000 |
| 66,137,000 | 66,138,000 | 66,139,000 | 66,140,000 | 66,141,000 | 66,142,000 | 66,143,000 | 66,144,000 |
| 66,145,000 | 66,146,000 | 66,147,000 | 66,148,000 | 66,149,000 | 66,150,000 | 66,151,000 | 66,152,000 |
| 66,153,000 | 66,154,000 | 66,155,000 | 66,156,000 | 66,157,000 | 66,158,000 | 66,159,000 | 66,160,000 |
| 66,161,000 | 66,162,000 | 66,163,000 | 66,164,000 | 66,165,000 | 66,166,000 | 66,167,000 | 66,168,000 |
| 66,169,000 | 66,170,000 | 66,171,000 | 66,172,000 | 66,173,000 | 66,174,000 | 66,175,000 | 66,176,000 |
| 66,177,000 | 66,178,000 | 66,179,000 | 66,180,000 | 66,181,000 | 66,182,000 | 66,183,000 | 66,184,000 |
| 66,185,000 | 66,186,000 | 66,187,000 | 66,188,000 | 66,189,000 | 66,190,000 | 66,191,000 | 66,192,000 |
| 66,193,000 | 66,194,000 | 66,195,000 | 66,196,000 | 66,197,000 | 66,198,000 | 66,199,000 | 66,200,000 |
| 66,201,000 | 66,202,000 | 66,203,000 | 66,204,000 | 66,205,000 | 66,206,000 | 66,207,000 | 66,208,000 |
| 66,209,000 | 66,210,000 | 66,211,000 | 66,212,000 | 66,213,000 | 66,214,000 | 66,215,000 | 66,216,000 |
| 66,217,000 | 66,218,000 | 66,219,000 | 66,220,000 | 66,221,000 | 66,222,000 | 66,223,000 | 66,224,000 |
| 66,225,000 | 66,226,000 | 66,227,000 | 66,228,000 | 66,229,000 | 66,230,000 | 66,231,000 | 66,232,000 |

Supplemental Figure S8

|            |            |            |            |                  |            |            |                  |
|------------|------------|------------|------------|------------------|------------|------------|------------------|
| 66,233,000 | 66,234,000 | 66,235,000 | 66,236,000 | 66,237,000       | 66,238,000 | 66,239,000 | 66,240,000       |
| 66,241,000 | 66,242,000 | 66,243,000 | 66,244,000 | 66,245,000       | 66,246,000 | 66,247,000 | 66,248,000       |
| 66,249,000 | 66,250,000 | 66,251,000 | 66,252,000 | 66,253,000       | 66,254,000 | 66,255,000 | 66,256,000       |
| 66,257,000 | 66,258,000 | 66,259,000 | 66,260,000 | 66,261,000       | 66,262,000 | 66,263,000 | 66,264,000       |
| 66,265,000 | 66,266,000 | 66,267,000 | 66,268,000 | 66,269,000       | 66,270,000 | 66,271,000 | 66,272,000       |
| 66,273,000 | 66,274,000 | 66,275,000 | 66,276,000 | NE<br>66,277,000 | 66,278,000 | 66,279,000 | NE<br>66,280,000 |
| 66,281,000 | 66,282,000 | 66,283,000 | 66,284,000 | 66,285,000       | 66,286,000 | 66,287,000 | 66,288,000       |
| 66,289,000 | 66,290,000 | 66,291,000 | 66,292,000 | 66,293,000       | 66,294,000 | 66,295,000 | 66,296,000       |
| 66,297,000 | 66,298,000 | 66,299,000 | 66,300,000 | 66,301,000       | 66,302,000 | 66,303,000 | 66,304,000       |
| 66,305,000 | 66,306,000 | 66,307,000 | 66,308,000 | 66,309,000       | 66,310,000 | 66,311,000 | 66,312,000       |
| 66,313,000 | 66,314,000 | 66,315,000 | 66,316,000 | 66,317,000       | 66,318,000 | 66,319,000 | 66,320,000       |
| 66,321,000 | 66,322,000 | 66,323,000 | 66,324,000 | 66,325,000       | 66,326,000 | 66,327,000 | 66,328,000       |
| 66,329,000 | 66,330,000 | 66,331,000 | 66,332,000 | 66,333,000       | 66,334,000 | 66,335,000 | 66,336,000       |
| 66,337,000 | 66,338,000 | 66,339,000 | 66,340,000 | 66,341,000       | 66,342,000 | 66,343,000 | 66,344,000       |
| 66,345,000 | 66,346,000 | 66,347,000 | 66,348,000 | 66,349,000       | 66,350,000 | 66,351,000 | 66,352,000       |
| 66,353,000 | 66,354,000 | 66,355,000 | 66,356,000 | 66,357,000       | 66,358,000 | 66,359,000 | 66,360,000       |
| 66,361,000 | 66,362,000 | 66,363,000 | 66,364,000 | 66,365,000       | 66,366,000 | 66,367,000 | 66,368,000       |
| 66,369,000 | 66,370,000 | 66,371,000 | 66,372,000 | 66,373,000       | 66,374,000 | 66,375,000 | 66,376,000       |
| 66,377,000 | 66,378,000 | 66,379,000 | 66,380,000 | 66,381,000       | 66,382,000 | 66,383,000 | 66,384,000       |
| 66,385,000 | 66,386,000 | 66,387,000 | 66,388,000 | 66,389,000       | 66,390,000 | 66,391,000 | 66,392,000       |
| 66,393,000 | 66,394,000 | 66,395,000 | 66,396,000 | 66,397,000       | 66,398,000 | 66,399,000 | 66,400,000       |
| 66,401,000 | 66,402,000 | 66,403,000 | 66,404,000 | 66,405,000       | 66,406,000 | 66,407,000 | 66,408,000       |



Supplemental Figure S8

|            |            |            |            |            |            |            |            |
|------------|------------|------------|------------|------------|------------|------------|------------|
| 66,409,000 | 66,410,000 | 66,411,000 | 66,412,000 | 66,413,000 | 66,414,000 | 66,415,000 | 66,416,000 |
| 66,417,000 | 66,418,000 | 66,419,000 | 66,420,000 | 66,421,000 | 66,422,000 | 66,423,000 | 66,424,000 |
| 66,425,000 | 66,426,000 | 66,427,000 | 66,428,000 | 66,429,000 | 66,430,000 | 66,431,000 | 66,432,000 |
| 66,433,000 | 66,434,000 | 66,435,000 | 66,436,000 | 66,437,000 | 66,438,000 | 66,439,000 | 66,440,000 |
| 66,441,000 | 66,442,000 | 66,443,000 | 66,444,000 | 66,445,000 | 66,446,000 | 66,447,000 | 66,448,000 |
| 66,449,000 | 66,450,000 | 66,451,000 | 66,452,000 | 66,453,000 | 66,454,000 | 66,455,000 | 66,456,000 |
| 66,457,000 | 66,458,000 | 66,459,000 | 66,460,000 | 66,461,000 | 66,462,000 | 66,463,000 | 66,464,000 |
| 66,465,000 | 66,466,000 | 66,467,000 | 66,468,000 | 66,469,000 | 66,470,000 | 66,471,000 | 66,472,000 |
| 66,473,000 | 66,474,000 | 66,475,000 | 66,476,000 | 66,477,000 | 66,478,000 | 66,479,000 | 66,480,000 |
| 66,481,000 | 66,482,000 | 66,483,000 | 66,484,000 | 66,485,000 | 66,486,000 | 66,487,000 | 66,488,000 |
| 66,489,000 | 66,490,000 | 66,491,000 | 66,492,000 | 66,493,000 | 66,494,000 | 66,495,000 | 66,496,000 |
| 66,497,000 | 66,498,000 | 66,499,000 | 66,500,000 | 66,501,000 | 66,502,000 | 66,503,000 | 66,504,000 |
| 66,505,000 | 66,506,000 | 66,507,000 | 66,508,000 | 66,509,000 | 66,510,000 | 66,511,000 | 66,512,000 |
| 66,513,000 | 66,514,000 | 66,515,000 | 66,516,000 | 66,517,000 | 66,518,000 | 66,519,000 | 66,520,000 |
| 66,521,000 | 66,522,000 | 66,523,000 | 66,524,000 | 66,525,000 | 66,526,000 | 66,527,000 | 66,528,000 |
| 66,529,000 | 66,530,000 | 66,531,000 | 66,532,000 | 66,533,000 | 66,534,000 | 66,535,000 | 66,536,000 |
| 66,537,000 | 66,538,000 | 66,539,000 | 66,540,000 | 66,541,000 | 66,542,000 | 66,543,000 | 66,544,000 |
| 66,545,000 | 66,546,000 | 66,547,000 | 66,548,000 | 66,549,000 | 66,550,000 | 66,551,000 | 66,552,000 |
| 66,553,000 | 66,554,000 | 66,555,000 | 66,556,000 | 66,557,000 | 66,558,000 | 66,559,000 | 66,560,000 |
| 66,561,000 | 66,562,000 | 66,563,000 | 66,564,000 | 66,565,000 | 66,566,000 | 66,567,000 | 66,568,000 |
| 66,569,000 | 66,570,000 | 66,571,000 | 66,572,000 | 66,573,000 | 66,574,000 | 66,575,000 | 66,576,000 |
| 66,577,000 | 66,578,000 | 66,579,000 | 66,580,000 | 66,581,000 | 66,582,000 | 66,583,000 | 66,584,000 |
| 66,585,000 | 66,586,000 | 66,587,000 | 66,588,000 | 66,589,000 | 66,590,000 | 66,591,000 | 66,592,000 |

Supplemental Figure S8

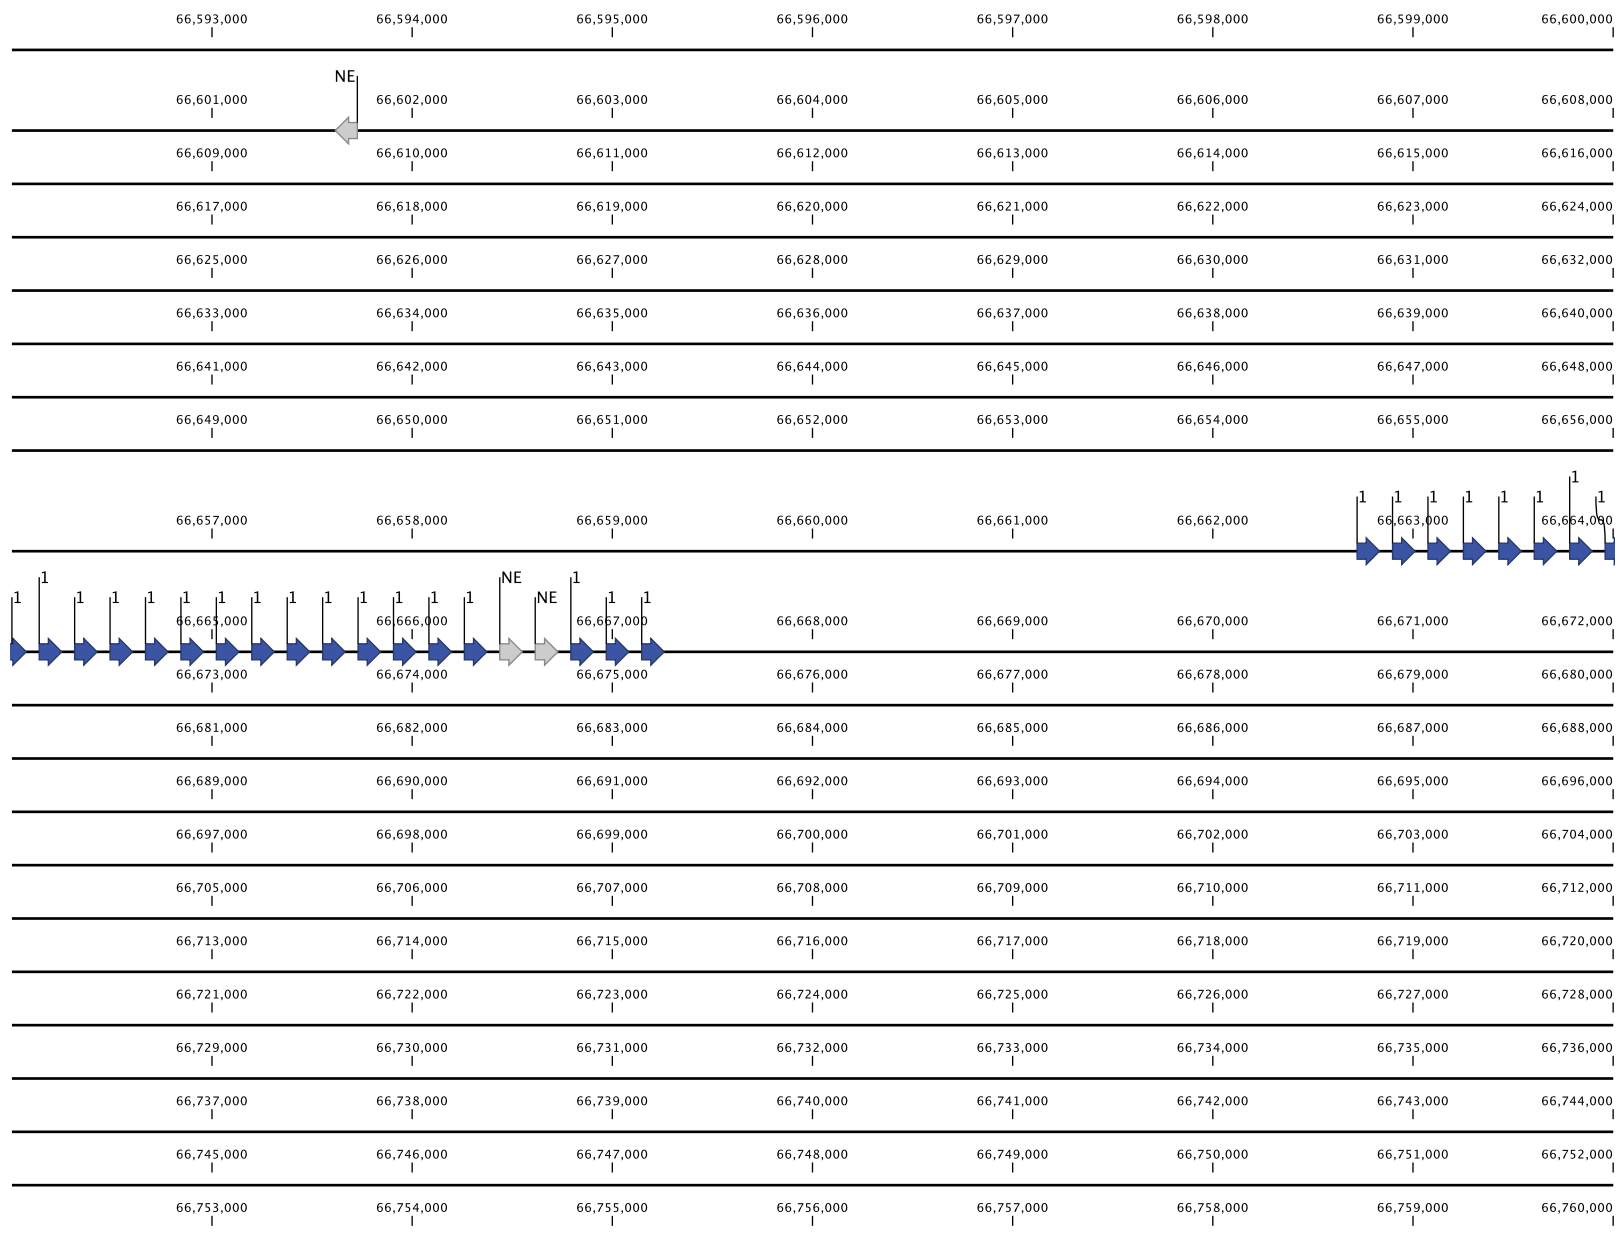

Supplemental Figure S8

|            |            |            |            |            |            |            |            |
|------------|------------|------------|------------|------------|------------|------------|------------|
| 66,761,000 | 66,762,000 | 66,763,000 | 66,764,000 | 66,765,000 | 66,766,000 | 66,767,000 | 66,768,000 |
| 66,769,000 | 66,770,000 | 66,771,000 | 66,772,000 | 66,773,000 | 66,774,000 | 66,775,000 | 66,776,000 |
| 66,777,000 | 66,778,000 | 66,779,000 | 66,780,000 | 66,781,000 | 66,782,000 | 66,783,000 | 66,784,000 |
| 66,785,000 | 66,786,000 | 66,787,000 | 66,788,000 | 66,789,000 | 66,790,000 | 66,791,000 | 66,792,000 |
| 66,793,000 | 66,794,000 | 66,795,000 | 66,796,000 | 66,797,000 | 66,798,000 | 66,799,000 | 66,800,000 |
| 66,801,000 | 66,802,000 | 66,803,000 | 66,804,000 | 66,805,000 | 66,806,000 | 66,807,000 | 66,808,000 |
| 66,809,000 | 66,810,000 | 66,811,000 | 66,812,000 | 66,813,000 | 66,814,000 | 66,815,000 | 66,816,000 |
| 66,817,000 | 66,818,000 | 66,819,000 | 66,820,000 | 66,821,000 | 66,822,000 | 66,823,000 | 66,824,000 |
| 66,825,000 | 66,826,000 | 66,827,000 | 66,828,000 | 66,829,000 | 66,830,000 | 66,831,000 | 66,832,000 |
| 66,833,000 | 66,834,000 | 66,835,000 | 66,836,000 | 66,837,000 | 66,838,000 | 66,839,000 | 66,840,000 |
| 66,841,000 | 66,842,000 | 66,843,000 | 66,844,000 | 66,845,000 | 66,846,000 | 66,847,000 | 66,848,000 |
| 66,849,000 | 66,850,000 | 66,851,000 | 66,852,000 | 66,853,000 | 66,854,000 | 66,855,000 | 66,856,000 |
| 66,857,000 | 66,858,000 | 66,859,000 | 66,860,000 | 66,861,000 | 66,862,000 | 66,863,000 | 66,864,000 |
| 66,865,000 | 66,866,000 | 66,867,000 | 66,868,000 | 66,869,000 | 66,870,000 | 66,871,000 | 66,872,000 |
| 66,873,000 | 66,874,000 | 66,875,000 | 66,876,000 | 66,877,000 | 66,878,000 | 66,879,000 | 66,880,000 |
| 66,881,000 | 66,882,000 | 66,883,000 | 66,884,000 | 66,885,000 | 66,886,000 | 66,887,000 | 66,888,000 |
| 66,889,000 | 66,890,000 | 66,891,000 | 66,892,000 | 66,893,000 | 66,894,000 | 66,895,000 | 66,896,000 |
| 66,897,000 | 66,898,000 | 66,899,000 | 66,900,000 | 66,901,000 | 66,902,000 | 66,903,000 | 66,904,000 |
| 66,905,000 | 66,906,000 | 66,907,000 | 66,908,000 | 66,909,000 | 66,910,000 | 66,911,000 | 66,912,000 |
| 66,913,000 | 66,914,000 | 66,915,000 | 66,916,000 | 66,917,000 | 66,918,000 | 66,919,000 | 66,920,000 |
| 66,921,000 | 66,922,000 | 66,923,000 | 66,924,000 | 66,925,000 | 66,926,000 | 66,927,000 | 66,928,000 |
| 66,929,000 | 66,930,000 | 66,931,000 | 66,932,000 | 66,933,000 | 66,934,000 | 66,935,000 | 66,936,000 |

NE  


NE  


Supplemental Figure S8

|            |            |            |            |            |            |            |            |
|------------|------------|------------|------------|------------|------------|------------|------------|
| 66,937,000 | 66,938,000 | 66,939,000 | 66,940,000 | 66,941,000 | 66,942,000 | 66,943,000 | 66,944,000 |
| 66,945,000 | 66,946,000 | 66,947,000 | 66,948,000 | 66,949,000 | 66,950,000 | 66,951,000 | 66,952,000 |
| 66,953,000 | 66,954,000 | 66,955,000 | 66,956,000 | 66,957,000 | 66,958,000 | 66,959,000 | 66,960,000 |
| 66,961,000 | 66,962,000 | 66,963,000 | 66,964,000 | 66,965,000 | 66,966,000 | 66,967,000 | 66,968,000 |
| 66,969,000 | 66,970,000 | 66,971,000 | 66,972,000 | 66,973,000 | 66,974,000 | 66,975,000 | 66,976,000 |
| 66,977,000 | 66,978,000 | 66,979,000 | 66,980,000 | 66,981,000 | 66,982,000 | 66,983,000 | 66,984,000 |
| 66,985,000 | 66,986,000 | 66,987,000 | 66,988,000 | 66,989,000 | 66,990,000 | 66,991,000 | 66,992,000 |
| 66,993,000 | 66,994,000 | 66,995,000 | 66,996,000 | 66,997,000 | 66,998,000 | 66,999,000 | 67,000,000 |
| 67,001,000 | 67,002,000 | 67,003,000 | 67,004,000 | 67,005,000 | 67,006,000 | 67,007,000 | 67,008,000 |
| 67,009,000 | 67,010,000 | 67,011,000 | 67,012,000 | 67,013,000 | 67,014,000 | 67,015,000 | 67,016,000 |
| 67,017,000 | 67,018,000 | 67,019,000 | 67,020,000 | 67,021,000 | 67,022,000 | 67,023,000 | 67,024,000 |
| 67,025,000 | 67,026,000 | 67,027,000 | 67,028,000 | 67,029,000 | 67,030,000 | 67,031,000 | 67,032,000 |
| 67,033,000 | 67,034,000 | 67,035,000 | 67,036,000 | 67,037,000 | 67,038,000 | 67,039,000 | 67,040,000 |
| 67,041,000 | 67,042,000 | 67,043,000 | 67,044,000 | 67,045,000 | 67,046,000 | 67,047,000 | 67,048,000 |
| 67,049,000 | 67,050,000 | 67,051,000 | 67,052,000 | 67,053,000 | 67,054,000 | 67,055,000 | 67,056,000 |
| 67,057,000 | 67,058,000 | 67,059,000 | 67,060,000 | 67,061,000 | 67,062,000 | 67,063,000 | 67,064,000 |
| 67,065,000 | 67,066,000 | 67,067,000 | 67,068,000 | 67,069,000 | 67,070,000 | 67,071,000 | 67,072,000 |
| 67,073,000 | 67,074,000 | 67,075,000 | 67,076,000 | 67,077,000 | 67,078,000 | 67,079,000 | 67,080,000 |
| 67,081,000 | 67,082,000 | 67,083,000 | 67,084,000 | 67,085,000 | 67,086,000 | 67,087,000 | 67,088,000 |
| 67,089,000 | 67,090,000 | 67,091,000 | 67,092,000 | 67,093,000 | 67,094,000 | 67,095,000 | 67,096,000 |
| 67,097,000 | 67,098,000 | 67,099,000 | 67,100,000 | 67,101,000 | 67,102,000 | 67,103,000 | 67,104,000 |
| 67,105,000 | 67,106,000 | 67,107,000 | 67,108,000 | 67,109,000 | 67,110,000 | 67,111,000 | 67,112,000 |
| 67,113,000 | 67,114,000 | 67,115,000 | 67,116,000 | 67,117,000 | 67,118,000 | 67,119,000 | 67,120,000 |

Supplemental Figure S8

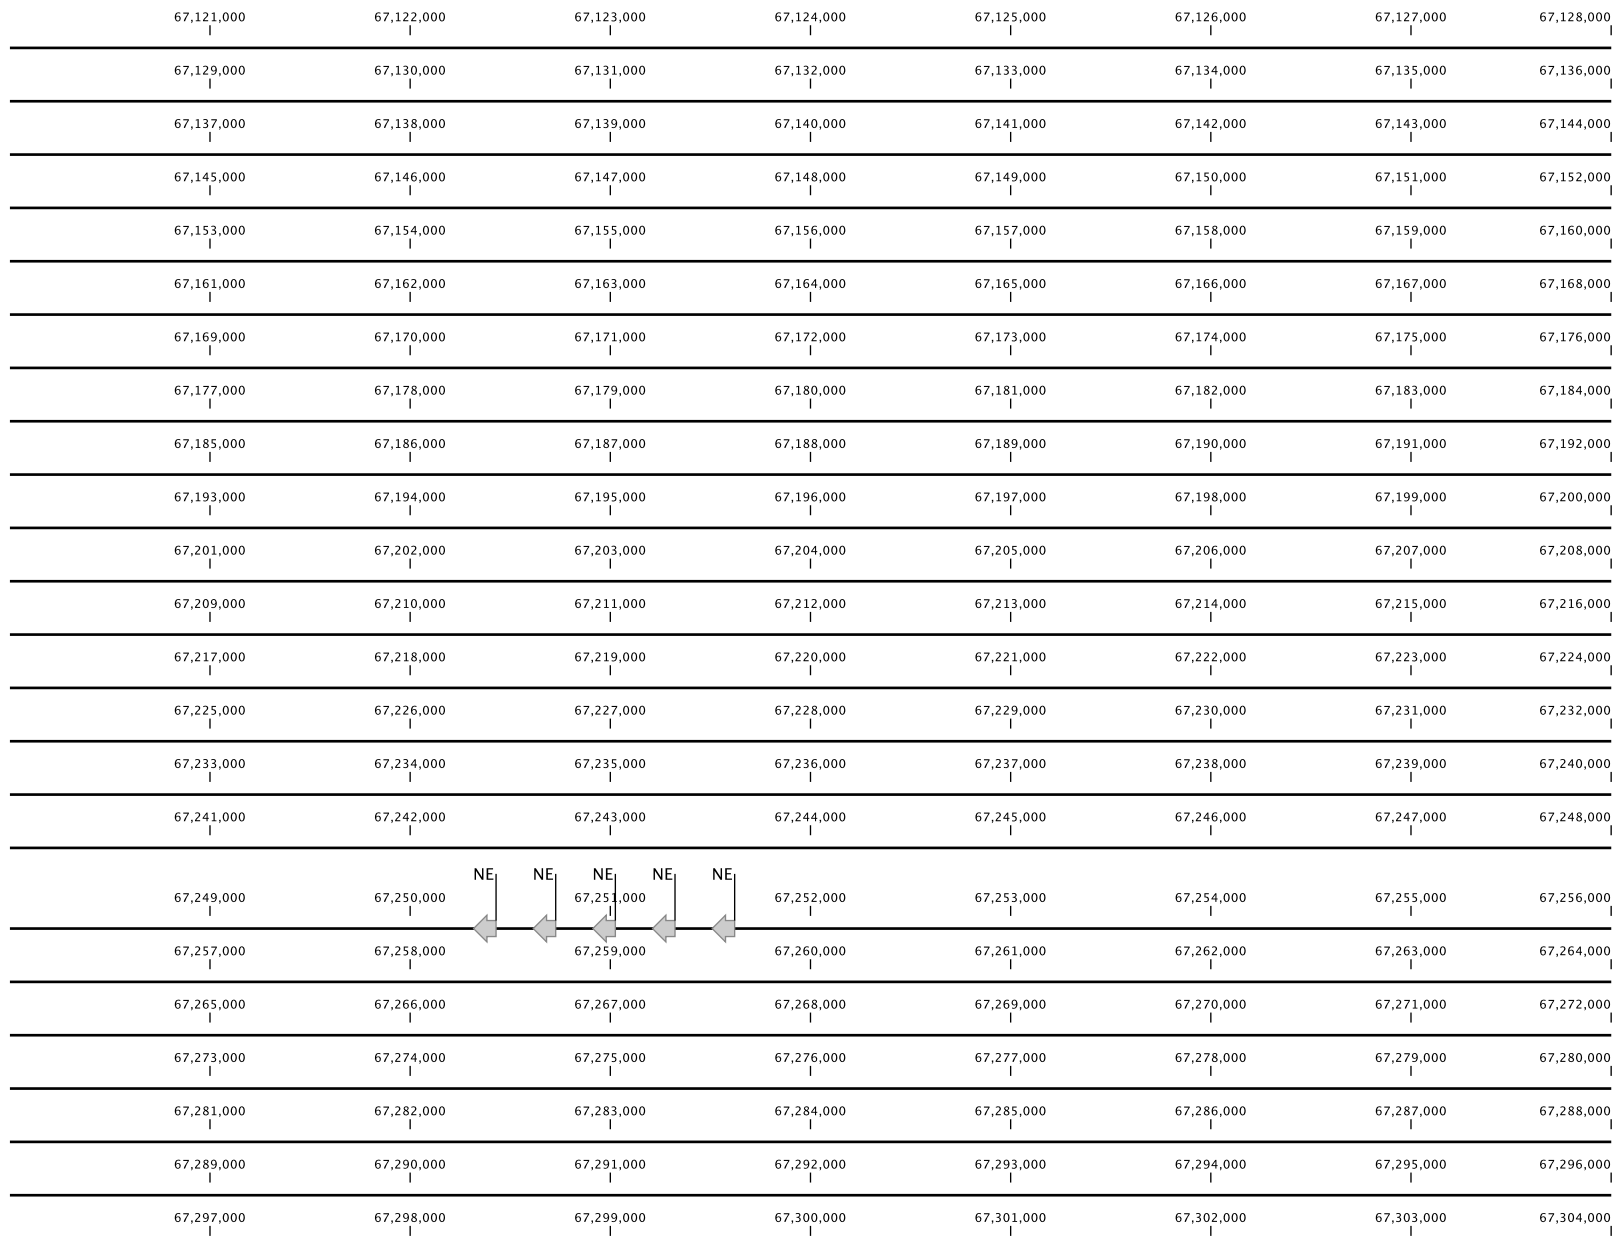

Supplemental Figure S8

|            |            |            |            |            |            |            |            |
|------------|------------|------------|------------|------------|------------|------------|------------|
| 67,305,000 | 67,306,000 | 67,307,000 | 67,308,000 | 67,309,000 | 67,310,000 | 67,311,000 | 67,312,000 |
| 67,313,000 | 67,314,000 | 67,315,000 | 67,316,000 | 67,317,000 | 67,318,000 | 67,319,000 | 67,320,000 |
| 67,321,000 | 67,322,000 | 67,323,000 | 67,324,000 | 67,325,000 | 67,326,000 | 67,327,000 | 67,328,000 |
| 67,329,000 | 67,330,000 | 67,331,000 | 67,332,000 | 67,333,000 | 67,334,000 | 67,335,000 | 67,336,000 |
| 67,337,000 | 67,338,000 | 67,339,000 | 67,340,000 | 67,341,000 | 67,342,000 | 67,343,000 | 67,344,000 |
| 67,345,000 | 67,346,000 | 67,347,000 | 67,348,000 | 67,349,000 | 67,350,000 | 67,351,000 | 67,352,000 |
| 67,353,000 | 67,354,000 | 67,355,000 | 67,356,000 | 67,357,000 | 67,358,000 | 67,359,000 | 67,360,000 |
| 67,361,000 | 67,362,000 | 67,363,000 | 67,364,000 | 67,365,000 | 67,366,000 | 67,367,000 | 67,368,000 |
| 67,369,000 | 67,370,000 | 67,371,000 | 67,372,000 | 67,373,000 | 67,374,000 | 67,375,000 | 67,376,000 |
| 67,377,000 | 67,378,000 | 67,379,000 | 67,380,000 | 67,381,000 | 67,382,000 | 67,383,000 | 67,384,000 |
| 67,385,000 | 67,386,000 | 67,387,000 | 67,388,000 | 67,389,000 | 67,390,000 | 67,391,000 | 67,392,000 |
| 67,393,000 | 67,394,000 | 67,395,000 | 67,396,000 | 67,397,000 | 67,398,000 | 67,399,000 | 67,400,000 |
| 67,401,000 | 67,402,000 | 67,403,000 | 67,404,000 | 67,405,000 | 67,406,000 | 67,407,000 | 67,408,000 |
| 67,409,000 | 67,410,000 | 67,411,000 | 67,412,000 | 67,413,000 | 67,414,000 | 67,415,000 | 67,416,000 |
| 67,417,000 | 67,418,000 | 67,419,000 | 67,420,000 | 67,421,000 | 67,422,000 | 67,423,000 | 67,424,000 |
| 67,425,000 | 67,426,000 | 67,427,000 | 67,428,000 | 67,429,000 | 67,430,000 | 67,431,000 | 67,432,000 |
| 67,433,000 | 67,434,000 | 67,435,000 | 67,436,000 | 67,437,000 | 67,438,000 | 67,439,000 | 67,440,000 |
| 67,441,000 | 67,442,000 | 67,443,000 | 67,444,000 | 67,445,000 | 67,446,000 | 67,447,000 | 67,448,000 |
| 67,449,000 | 67,450,000 | 67,451,000 | 67,452,000 | 67,453,000 | 67,454,000 | 67,455,000 | 67,456,000 |
| 67,457,000 | 67,458,000 | 67,459,000 | 67,460,000 | 67,461,000 | 67,462,000 | 67,463,000 | 67,464,000 |
| 67,465,000 | 67,466,000 | 67,467,000 | 67,468,000 | 67,469,000 | 67,470,000 | 67,471,000 | 67,472,000 |
| 67,473,000 | 67,474,000 | 67,475,000 | 67,476,000 | 67,477,000 | 67,478,000 | 67,479,000 | 67,480,000 |
| 67,481,000 | 67,482,000 | 67,483,000 | 67,484,000 | 67,485,000 | 67,486,000 | 67,487,000 | 67,488,000 |

Supplemental Figure S8

|            |            |            |            |            |            |            |            |
|------------|------------|------------|------------|------------|------------|------------|------------|
| 67,489,000 | 67,490,000 | 67,491,000 | 67,492,000 | 67,493,000 | 67,494,000 | 67,495,000 | 67,496,000 |
| 67,497,000 | 67,498,000 | 67,499,000 | 67,500,000 | 67,501,000 | 67,502,000 | 67,503,000 | 67,504,000 |
| 67,505,000 | 67,506,000 | 67,507,000 | 67,508,000 | 67,509,000 | 67,510,000 | 67,511,000 | 67,512,000 |
| 67,513,000 | 67,514,000 | 67,515,000 | 67,516,000 | 67,517,000 | 67,518,000 | 67,519,000 | 67,520,000 |
| 67,521,000 | 67,522,000 | 67,523,000 | 67,524,000 | 67,525,000 | 67,526,000 | 67,527,000 | 67,528,000 |
| 67,529,000 | 67,530,000 | 67,531,000 | 67,532,000 | 67,533,000 | 67,534,000 | 67,535,000 | 67,536,000 |
| 67,537,000 | 67,538,000 | 67,539,000 | 67,540,000 | 67,541,000 | 67,542,000 | 67,543,000 | 67,544,000 |
| 67,545,000 | 67,546,000 | 67,547,000 | 67,548,000 | 67,549,000 | 67,550,000 | 67,551,000 | 67,552,000 |
| 67,553,000 | 67,554,000 | 67,555,000 | 67,556,000 | 67,557,000 | 67,558,000 | 67,559,000 | 67,560,000 |
| 67,561,000 | 67,562,000 | 67,563,000 | 67,564,000 | 67,565,000 | 67,566,000 | 67,567,000 | 67,568,000 |
| 67,569,000 | 67,570,000 | 67,571,000 | 67,572,000 | 67,573,000 | 67,574,000 | 67,575,000 | 67,576,000 |
| 67,577,000 | 67,578,000 | 67,579,000 | 67,580,000 | 67,581,000 | 67,582,000 | 67,583,000 | 67,584,000 |
| 67,585,000 | 67,586,000 | 67,587,000 | 67,588,000 | 67,589,000 | 67,590,000 | 67,591,000 | 67,592,000 |
| 67,593,000 | 67,594,000 | 67,595,000 | 67,596,000 | 67,597,000 | 67,598,000 | 67,599,000 | 67,600,000 |
| 67,601,000 | 67,602,000 | 67,603,000 | 67,604,000 | 67,605,000 | 67,606,000 | 67,607,000 | 67,608,000 |
| 67,609,000 | 67,610,000 | 67,611,000 | 67,612,000 | 67,613,000 | 67,614,000 | 67,615,000 | 67,616,000 |
| 67,617,000 | 67,618,000 | 67,619,000 | 67,620,000 | 67,621,000 | 67,622,000 | 67,623,000 | 67,624,000 |
| 67,625,000 | 67,626,000 | 67,627,000 | 67,628,000 | 67,629,000 | 67,630,000 | 67,631,000 | 67,632,000 |
| 67,633,000 | 67,634,000 | 67,635,000 | 67,636,000 | 67,637,000 | 67,638,000 | 67,639,000 | 67,640,000 |
| 67,641,000 | 67,642,000 | 67,643,000 | 67,644,000 | 67,645,000 | 67,646,000 | 67,647,000 | 67,648,000 |
| 67,649,000 | 67,650,000 | 67,651,000 | 67,652,000 | 67,653,000 | 67,654,000 | 67,655,000 | 67,656,000 |
| 67,657,000 | 67,658,000 | 67,659,000 | 67,660,000 | 67,661,000 | 67,662,000 | 67,663,000 | 67,664,000 |
| 67,665,000 | 67,666,000 | 67,667,000 | 67,668,000 | 67,669,000 | 67,670,000 | 67,671,000 | 67,672,000 |

Supplemental Figure S8

|            |            |            |            |            |            |            |            |
|------------|------------|------------|------------|------------|------------|------------|------------|
| 67,673,000 | 67,674,000 | 67,675,000 | 67,676,000 | 67,677,000 | 67,678,000 | 67,679,000 | 67,680,000 |
| 67,681,000 | 67,682,000 | 67,683,000 | 67,684,000 | 67,685,000 | 67,686,000 | 67,687,000 | 67,688,000 |
| 67,689,000 | 67,690,000 | 67,691,000 | 67,692,000 | 67,693,000 | 67,694,000 | 67,695,000 | 67,696,000 |
| 67,697,000 | 67,698,000 | 67,699,000 | 67,700,000 | 67,701,000 | 67,702,000 | 67,703,000 | 67,704,000 |
| 67,705,000 | 67,706,000 | 67,707,000 | 67,708,000 | 67,709,000 | 67,710,000 | 67,711,000 | 67,712,000 |
| 67,713,000 | 67,714,000 | 67,715,000 | 67,716,000 | 67,717,000 | 67,718,000 | 67,719,000 | 67,720,000 |
| 67,721,000 | 67,722,000 | 67,723,000 | 67,724,000 | 67,725,000 | 67,726,000 | 67,727,000 | 67,728,000 |
| 67,729,000 | 67,730,000 | 67,731,000 | 67,732,000 | 67,733,000 | 67,734,000 | 67,735,000 | 67,736,000 |
| 67,737,000 | 67,738,000 | 67,739,000 | 67,740,000 | 67,741,000 | 67,742,000 | 67,743,000 | 67,744,000 |
| 67,745,000 | 67,746,000 | 67,747,000 | 67,748,000 | 67,749,000 | 67,750,000 | 67,751,000 | 67,752,000 |
| 67,753,000 | 67,754,000 | 67,755,000 | 67,756,000 | 67,757,000 | 67,758,000 | 67,759,000 | 67,760,000 |
| 67,761,000 | 67,762,000 | 67,763,000 | 67,764,000 | 67,765,000 | 67,766,000 | 67,767,000 | 67,768,000 |
| 67,769,000 | 67,770,000 | 67,771,000 | 67,772,000 | 67,773,000 | 67,774,000 | 67,775,000 | 67,776,000 |
| 67,777,000 | 67,778,000 | 67,779,000 | 67,780,000 | 67,781,000 | 67,782,000 | 67,783,000 | 67,784,000 |
| 67,785,000 | 67,786,000 | 67,787,000 | 67,788,000 | 67,789,000 | 67,790,000 | 67,791,000 | 67,792,000 |
| 67,793,000 | 67,794,000 | 67,795,000 | 67,796,000 | 67,797,000 | 67,798,000 | 67,799,000 | 67,800,000 |
| 67,801,000 | 67,802,000 | 67,803,000 | 67,804,000 | 67,805,000 | 67,806,000 | 67,807,000 | 67,808,000 |
| 67,809,000 | 67,810,000 | 67,811,000 | 67,812,000 | 67,813,000 | 67,814,000 | 67,815,000 | 67,816,000 |
| 67,817,000 | 67,818,000 | 67,819,000 | 67,820,000 | 67,821,000 | 67,822,000 | 67,823,000 | 67,824,000 |
| 67,825,000 | 67,826,000 | 67,827,000 | 67,828,000 | 67,829,000 | 67,830,000 | 67,831,000 | 67,832,000 |
| 67,833,000 | 67,834,000 | 67,835,000 | 67,836,000 | 67,837,000 | 67,838,000 | 67,839,000 | 67,840,000 |
| 67,841,000 | 67,842,000 | 67,843,000 | 67,844,000 | 67,845,000 | 67,846,000 | 67,847,000 | 67,848,000 |
| 67,849,000 | 67,850,000 | 67,851,000 | 67,852,000 | 67,853,000 | 67,854,000 | 67,855,000 | 67,856,000 |



Supplemental Figure S8

|            |            |            |            |            |            |            |            |
|------------|------------|------------|------------|------------|------------|------------|------------|
| 67,857,000 | 67,858,000 | 67,859,000 | 67,860,000 | 67,861,000 | 67,862,000 | 67,863,000 | 67,864,000 |
| 67,865,000 | 67,866,000 | 67,867,000 | 67,868,000 | 67,869,000 | 67,870,000 | 67,871,000 | 67,872,000 |
| 67,873,000 | 67,874,000 | 67,875,000 | 67,876,000 | 67,877,000 | 67,878,000 | 67,879,000 | 67,880,000 |
| 67,881,000 | 67,882,000 | 67,883,000 | 67,884,000 | 67,885,000 | 67,886,000 | 67,887,000 | 67,888,000 |
| 67,889,000 | 67,890,000 | 67,891,000 | 67,892,000 | 67,893,000 | 67,894,000 | 67,895,000 | 67,896,000 |
| 67,897,000 | 67,898,000 | 67,899,000 | 67,900,000 | 67,901,000 | 67,902,000 | 67,903,000 | 67,904,000 |
| 67,905,000 | 67,906,000 | 67,907,000 | 67,908,000 | 67,909,000 | 67,910,000 | 67,911,000 | 67,912,000 |
| 67,913,000 | 67,914,000 | 67,915,000 | 67,916,000 | 67,917,000 | 67,918,000 | 67,919,000 | 67,920,000 |
| 67,921,000 | 67,922,000 | 67,923,000 | 67,924,000 | 67,925,000 | 67,926,000 | 67,927,000 | 67,928,000 |
| 67,929,000 | 67,930,000 | 67,931,000 | 67,932,000 | 67,933,000 | 67,934,000 | 67,935,000 | 67,936,000 |
| 67,937,000 | 67,938,000 | 67,939,000 | 67,940,000 | 67,941,000 | 67,942,000 | 67,943,000 | 67,944,000 |
| 67,945,000 | 67,946,000 | 67,947,000 | 67,948,000 | 67,949,000 | 67,950,000 | 67,951,000 | 67,952,000 |
| 67,953,000 | 67,954,000 | 67,955,000 | 67,956,000 | 67,957,000 | 67,958,000 | 67,959,000 | 67,960,000 |
| 67,961,000 | 67,962,000 | 67,963,000 | 67,964,000 | 67,965,000 | 67,966,000 | 67,967,000 | 67,968,000 |
| 67,969,000 | 67,970,000 | 67,971,000 | 67,972,000 | 67,973,000 | 67,974,000 | 67,975,000 | 67,976,000 |
| 67,977,000 | 67,978,000 | 67,979,000 | 67,980,000 | 67,981,000 | 67,982,000 | 67,983,000 | 67,984,000 |
| 67,985,000 | 67,986,000 | 67,987,000 | 67,988,000 | 67,989,000 | 67,990,000 | 67,991,000 | 67,992,000 |
| 67,993,000 | 67,994,000 | 67,995,000 | 67,996,000 | 67,997,000 | 67,998,000 | 67,999,000 | 68,000,000 |
| 68,001,000 | 68,002,000 | 68,003,000 | 68,004,000 | 68,005,000 | 68,006,000 | 68,007,000 | 68,008,000 |
| 68,009,000 | 68,010,000 | 68,011,000 | 68,012,000 | 68,013,000 | 68,014,000 | 68,015,000 | 68,016,000 |
| 68,017,000 | 68,018,000 | 68,019,000 | 68,020,000 | 68,021,000 | 68,022,000 | 68,023,000 | 68,024,000 |
| 68,025,000 | 68,026,000 | 68,027,000 | 68,028,000 | 68,029,000 | 68,030,000 | 68,031,000 | 68,032,000 |
| 68,033,000 | 68,034,000 | 68,035,000 | 68,036,000 | 68,037,000 | 68,038,000 | 68,039,000 | 68,040,000 |

Supplemental Figure S8

|            |            |            |            |            |            |            |            |
|------------|------------|------------|------------|------------|------------|------------|------------|
| 68,041,000 | 68,042,000 | 68,043,000 | 68,044,000 | 68,045,000 | 68,046,000 | 68,047,000 | 68,048,000 |
| 68,049,000 | 68,050,000 | 68,051,000 | 68,052,000 | 68,053,000 | 68,054,000 | 68,055,000 | 68,056,000 |
| 68,057,000 | 68,058,000 | 68,059,000 | 68,060,000 | 68,061,000 | 68,062,000 | 68,063,000 | 68,064,000 |
| 68,065,000 | 68,066,000 | 68,067,000 | 68,068,000 | 68,069,000 | 68,070,000 | 68,071,000 | 68,072,000 |
| 68,073,000 | 68,074,000 | 68,075,000 | 68,076,000 | 68,077,000 | 68,078,000 | 68,079,000 | 68,080,000 |
| 68,081,000 | 68,082,000 | 68,083,000 | 68,084,000 | 68,085,000 | 68,086,000 | 68,087,000 | 68,088,000 |
| 68,089,000 | 68,090,000 | 68,091,000 | 68,092,000 | 68,093,000 | 68,094,000 | 68,095,000 | 68,096,000 |
| 68,097,000 | 68,098,000 | 68,099,000 | 68,100,000 | 68,101,000 | 68,102,000 | 68,103,000 | 68,104,000 |
| 68,105,000 | 68,106,000 | 68,107,000 | 68,108,000 | 68,109,000 | 68,110,000 | 68,111,000 | 68,112,000 |
| 68,113,000 | 68,114,000 | 68,115,000 | 68,116,000 | 68,117,000 | 68,118,000 | 68,119,000 | 68,120,000 |
| 68,121,000 | 68,122,000 | 68,123,000 | 68,124,000 | 68,125,000 | 68,126,000 | 68,127,000 | 68,128,000 |
| 68,129,000 | 68,130,000 | 68,131,000 | 68,132,000 | 68,133,000 | 68,134,000 | 68,135,000 | 68,136,000 |
| 68,137,000 | 68,138,000 | 68,139,000 | 68,140,000 | 68,141,000 | 68,142,000 | 68,143,000 | 68,144,000 |
| 68,145,000 | 68,146,000 | 68,147,000 | 68,148,000 | 68,149,000 | 68,150,000 | 68,151,000 | 68,152,000 |
| 68,153,000 | 68,154,000 | 68,155,000 | 68,156,000 | 68,157,000 | 68,158,000 | 68,159,000 | 68,160,000 |
| 68,161,000 | 68,162,000 | 68,163,000 | 68,164,000 | 68,165,000 | 68,166,000 | 68,167,000 | 68,168,000 |
| 68,169,000 | 68,170,000 | 68,171,000 | 68,172,000 | 68,173,000 | 68,174,000 | 68,175,000 | 68,176,000 |
| 68,177,000 | 68,178,000 | 68,179,000 | 68,180,000 | 68,181,000 | 68,182,000 | 68,183,000 | 68,184,000 |
| 68,185,000 | 68,186,000 | 68,187,000 | 68,188,000 | 68,189,000 | 68,190,000 | 68,191,000 | 68,192,000 |
| 68,193,000 | 68,194,000 | 68,195,000 | 68,196,000 | 68,197,000 | 68,198,000 | 68,199,000 | 68,200,000 |
| 68,201,000 | 68,202,000 | 68,203,000 | 68,204,000 | 68,205,000 | 68,206,000 | 68,207,000 | 68,208,000 |
| 68,209,000 | 68,210,000 | 68,211,000 | 68,212,000 | 68,213,000 | 68,214,000 | 68,215,000 | 68,216,000 |
| 68,217,000 | 68,218,000 | 68,219,000 | 68,220,000 | 68,221,000 | 68,222,000 | 68,223,000 | 68,224,000 |

Supplemental Figure S8

|            |            |            |            |            |            |            |            |
|------------|------------|------------|------------|------------|------------|------------|------------|
| 68,225,000 | 68,226,000 | 68,227,000 | 68,228,000 | 68,229,000 | 68,230,000 | 68,231,000 | 68,232,000 |
| 68,233,000 | 68,234,000 | 68,235,000 | 68,236,000 | 68,237,000 | 68,238,000 | 68,239,000 | 68,240,000 |
| 68,241,000 | 68,242,000 | 68,243,000 | 68,244,000 | 68,245,000 | 68,246,000 | 68,247,000 | 68,248,000 |
| 68,249,000 | 68,250,000 | 68,251,000 | 68,252,000 | 68,253,000 | 68,254,000 | 68,255,000 | 68,256,000 |
| 68,257,000 | 68,258,000 | 68,259,000 | 68,260,000 | 68,261,000 | 68,262,000 | 68,263,000 | 68,264,000 |
| 68,265,000 | 68,266,000 | 68,267,000 | 68,268,000 | 68,269,000 | 68,270,000 | 68,271,000 | 68,272,000 |
| 68,273,000 | 68,274,000 | 68,275,000 | 68,276,000 | 68,277,000 | 68,278,000 | 68,279,000 | 68,280,000 |
| 68,281,000 | 68,282,000 | 68,283,000 | 68,284,000 | 68,285,000 | 68,286,000 | 68,287,000 | 68,288,000 |
| 68,289,000 | 68,290,000 | 68,291,000 | 68,292,000 | 68,293,000 | 68,294,000 | 68,295,000 | 68,296,000 |
| 68,297,000 | 68,298,000 | 68,299,000 | 68,300,000 | 68,301,000 | 68,302,000 | 68,303,000 | 68,304,000 |
| 68,305,000 | 68,306,000 | 68,307,000 | 68,308,000 | 68,309,000 | 68,310,000 | 68,311,000 | 68,312,000 |
| 68,313,000 | 68,314,000 | 68,315,000 | 68,316,000 | 68,317,000 | 68,318,000 | 68,319,000 | 68,320,000 |
| 68,321,000 | 68,322,000 | 68,323,000 | 68,324,000 | 68,325,000 | 68,326,000 | 68,327,000 | 68,328,000 |
| 68,329,000 | 68,330,000 | 68,331,000 | 68,332,000 | 68,333,000 | 68,334,000 | 68,335,000 | 68,336,000 |
| 68,337,000 | 68,338,000 | 68,339,000 | 68,340,000 | 68,341,000 | 68,342,000 | 68,343,000 | 68,344,000 |
| 68,345,000 | 68,346,000 | 68,347,000 | 68,348,000 | 68,349,000 | 68,350,000 | 68,351,000 | 68,352,000 |
| 68,353,000 | 68,354,000 | 68,355,000 | 68,356,000 | 68,357,000 | 68,358,000 | 68,359,000 | 68,360,000 |
| 68,361,000 | 68,362,000 | 68,363,000 | 68,364,000 | 68,365,000 | 68,366,000 | 68,367,000 | 68,368,000 |
| 68,369,000 | 68,370,000 | 68,371,000 | 68,372,000 | 68,373,000 | 68,374,000 | 68,375,000 | 68,376,000 |
| 68,377,000 | 68,378,000 | 68,379,000 | 68,380,000 | 68,381,000 | 68,382,000 | 68,383,000 | 68,384,000 |
| 68,385,000 | 68,386,000 | 68,387,000 | 68,388,000 | 68,389,000 | 68,390,000 | 68,391,000 | 68,392,000 |
| 68,393,000 | 68,394,000 | 68,395,000 | 68,396,000 | 68,397,000 | 68,398,000 | 68,399,000 | 68,400,000 |

NE

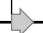

NE

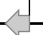

Supplemental Figure S8

|            |            |            |            |            |            |            |            |
|------------|------------|------------|------------|------------|------------|------------|------------|
| 68,401,000 | 68,402,000 | 68,403,000 | 68,404,000 | 68,405,000 | 68,406,000 | 68,407,000 | 68,408,000 |
| 68,409,000 | 68,410,000 | 68,411,000 | 68,412,000 | 68,413,000 | 68,414,000 | 68,415,000 | 68,416,000 |
| 68,417,000 | 68,418,000 | 68,419,000 | 68,420,000 | 68,421,000 | 68,422,000 | 68,423,000 | 68,424,000 |
| 68,425,000 | 68,426,000 | 68,427,000 | 68,428,000 | 68,429,000 | 68,430,000 | 68,431,000 | 68,432,000 |
| 68,433,000 | 68,434,000 | 68,435,000 | 68,436,000 | 68,437,000 | 68,438,000 | 68,439,000 | 68,440,000 |
| 68,441,000 | 68,442,000 | 68,443,000 | 68,444,000 | 68,445,000 | 68,446,000 | 68,447,000 | 68,448,000 |
| 68,449,000 | 68,450,000 | 68,451,000 | 68,452,000 | 68,453,000 | 68,454,000 | 68,455,000 | 68,456,000 |
| 68,457,000 | 68,458,000 | 68,459,000 | 68,460,000 | 68,461,000 | 68,462,000 | 68,463,000 | 68,464,000 |
| 68,465,000 | 68,466,000 | 68,467,000 | 68,468,000 | 68,469,000 | 68,470,000 | 68,471,000 | 68,472,000 |
| 68,473,000 | 68,474,000 | 68,475,000 | 68,476,000 | 68,477,000 | 68,478,000 | 68,479,000 | 68,480,000 |
| 68,481,000 | 68,482,000 | 68,483,000 | 68,484,000 | 68,485,000 | 68,486,000 | 68,487,000 | 68,488,000 |
| 68,489,000 | 68,490,000 | 68,491,000 | 68,492,000 | 68,493,000 | 68,494,000 | 68,495,000 | 68,496,000 |
| 68,497,000 | 68,498,000 | 68,499,000 | 68,500,000 | 68,501,000 | 68,502,000 | 68,503,000 | 68,504,000 |
| 68,505,000 | 68,506,000 | 68,507,000 | 68,508,000 | 68,509,000 | 68,510,000 | 68,511,000 | 68,512,000 |
| 68,513,000 | 68,514,000 | 68,515,000 | 68,516,000 | 68,517,000 | 68,518,000 | 68,519,000 | 68,520,000 |
| 68,521,000 | 68,522,000 | 68,523,000 | 68,524,000 | 68,525,000 | 68,526,000 | 68,527,000 | 68,528,000 |
| 68,529,000 | 68,530,000 | 68,531,000 | 68,532,000 | 68,533,000 | 68,534,000 | 68,535,000 | 68,536,000 |
| 68,537,000 | 68,538,000 | 68,539,000 | 68,540,000 | 68,541,000 | 68,542,000 | 68,543,000 | 68,544,000 |
| 68,545,000 | 68,546,000 | 68,547,000 | 68,548,000 | 68,549,000 | 68,550,000 | 68,551,000 | 68,552,000 |
| 68,553,000 | 68,554,000 | 68,555,000 | 68,556,000 | 68,557,000 | 68,558,000 | 68,559,000 | 68,560,000 |
| 68,561,000 | 68,562,000 | 68,563,000 | 68,564,000 | 68,565,000 | 68,566,000 | 68,567,000 | 68,568,000 |
| 68,569,000 | 68,570,000 | 68,571,000 | 68,572,000 | 68,573,000 | 68,574,000 | 68,575,000 | 68,576,000 |
| 68,577,000 | 68,578,000 | 68,579,000 | 68,580,000 | 68,581,000 | 68,582,000 | 68,583,000 | 68,584,000 |

Supplemental Figure S8

|            |            |            |            |            |            |            |            |
|------------|------------|------------|------------|------------|------------|------------|------------|
| 68,585,000 | 68,586,000 | 68,587,000 | 68,588,000 | 68,589,000 | 68,590,000 | 68,591,000 | 68,592,000 |
| 68,593,000 | 68,594,000 | 68,595,000 | 68,596,000 | 68,597,000 | 68,598,000 | 68,599,000 | 68,600,000 |
| 68,601,000 | 68,602,000 | 68,603,000 | 68,604,000 | 68,605,000 | 68,606,000 | 68,607,000 | 68,608,000 |
| 68,609,000 | 68,610,000 | 68,611,000 | 68,612,000 | 68,613,000 | 68,614,000 | 68,615,000 | 68,616,000 |
| 68,617,000 | 68,618,000 | 68,619,000 | 68,620,000 | 68,621,000 | 68,622,000 | 68,623,000 | 68,624,000 |
| 68,625,000 | 68,626,000 | 68,627,000 | 68,628,000 | 68,629,000 | 68,630,000 | 68,631,000 | 68,632,000 |
| 68,633,000 | 68,634,000 | 68,635,000 | 68,636,000 | 68,637,000 | 68,638,000 | 68,639,000 | 68,640,000 |
| 68,641,000 | 68,642,000 | 68,643,000 | 68,644,000 | 68,645,000 | 68,646,000 | 68,647,000 | 68,648,000 |
| 68,649,000 | 68,650,000 | 68,651,000 | 68,652,000 | 68,653,000 | 68,654,000 | 68,655,000 | 68,656,000 |
| 68,657,000 | 68,658,000 | 68,659,000 | 68,660,000 | 68,661,000 | 68,662,000 | 68,663,000 | 68,664,000 |
| 68,665,000 | 68,666,000 | 68,667,000 | 68,668,000 | 68,669,000 | 68,670,000 | 68,671,000 | 68,672,000 |
| 68,673,000 | 68,674,000 | 68,675,000 | 68,676,000 | 68,677,000 | 68,678,000 | 68,679,000 | 68,680,000 |
| 68,681,000 | 68,682,000 | 68,683,000 | 68,684,000 | 68,685,000 | 68,686,000 | 68,687,000 | 68,688,000 |
| 68,689,000 | 68,690,000 | 68,691,000 | 68,692,000 | 68,693,000 | 68,694,000 | 68,695,000 | 68,696,000 |
| 68,697,000 | 68,698,000 | 68,699,000 | 68,700,000 | 68,701,000 | 68,702,000 | 68,703,000 | 68,704,000 |
| 68,705,000 | 68,706,000 | 68,707,000 | 68,708,000 | 68,709,000 | 68,710,000 | 68,711,000 | 68,712,000 |
| 68,713,000 | 68,714,000 | 68,715,000 | 68,716,000 | 68,717,000 | 68,718,000 | 68,719,000 | 68,720,000 |
| 68,721,000 | 68,722,000 | 68,723,000 | 68,724,000 | 68,725,000 | 68,726,000 | 68,727,000 | 68,728,000 |
| 68,729,000 | 68,730,000 | 68,731,000 | 68,732,000 | 68,733,000 | 68,734,000 | 68,735,000 | 68,736,000 |
| 68,737,000 | 68,738,000 | 68,739,000 | 68,740,000 | 68,741,000 | 68,742,000 | 68,743,000 | 68,744,000 |
| 68,745,000 | 68,746,000 | 68,747,000 | 68,748,000 | 68,749,000 | 68,750,000 | 68,751,000 | 68,752,000 |
| 68,753,000 | 68,754,000 | 68,755,000 | 68,756,000 | 68,757,000 | 68,758,000 | 68,759,000 | 68,760,000 |
| 68,761,000 | 68,762,000 | 68,763,000 | 68,764,000 | 68,765,000 | 68,766,000 | 68,767,000 | 68,768,000 |

NE

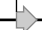

Supplemental Figure S8

|            |            |            |            |            |            |            |            |
|------------|------------|------------|------------|------------|------------|------------|------------|
| 68,769,000 | 68,770,000 | 68,771,000 | 68,772,000 | 68,773,000 | 68,774,000 | 68,775,000 | 68,776,000 |
| 68,777,000 | 68,778,000 | 68,779,000 | 68,780,000 | 68,781,000 | 68,782,000 | 68,783,000 | 68,784,000 |
| 68,785,000 | 68,786,000 | 68,787,000 | 68,788,000 | 68,789,000 | 68,790,000 | 68,791,000 | 68,792,000 |
| 68,793,000 | 68,794,000 | 68,795,000 | 68,796,000 | 68,797,000 | 68,798,000 | 68,799,000 | 68,800,000 |
| 68,801,000 | 68,802,000 | 68,803,000 | 68,804,000 | 68,805,000 | 68,806,000 | 68,807,000 | 68,808,000 |
| 68,809,000 | 68,810,000 | 68,811,000 | 68,812,000 | 68,813,000 | 68,814,000 | 68,815,000 | 68,816,000 |
| 68,817,000 | 68,818,000 | 68,819,000 | 68,820,000 | 68,821,000 | 68,822,000 | 68,823,000 | 68,824,000 |
| 68,825,000 | 68,826,000 | 68,827,000 | 68,828,000 | 68,829,000 | 68,830,000 | 68,831,000 | 68,832,000 |
| 68,833,000 | 68,834,000 | 68,835,000 | 68,836,000 | 68,837,000 | 68,838,000 | 68,839,000 | 68,840,000 |
| 68,841,000 | 68,842,000 | 68,843,000 | 68,844,000 | 68,845,000 | 68,846,000 | 68,847,000 | 68,848,000 |
| 68,849,000 | 68,850,000 | 68,851,000 | 68,852,000 | 68,853,000 | 68,854,000 | 68,855,000 | 68,856,000 |
| 68,857,000 | 68,858,000 | 68,859,000 | 68,860,000 | 68,861,000 | 68,862,000 | 68,863,000 | 68,864,000 |
| 68,865,000 | 68,866,000 | 68,867,000 | 68,868,000 | 68,869,000 | 68,870,000 | 68,871,000 | 68,872,000 |
| 68,873,000 | 68,874,000 | 68,875,000 | 68,876,000 | 68,877,000 | 68,878,000 | 68,879,000 | 68,880,000 |
| 68,881,000 | 68,882,000 | 68,883,000 | 68,884,000 | 68,885,000 | 68,886,000 | 68,887,000 | 68,888,000 |
| 68,889,000 | 68,890,000 | 68,891,000 | 68,892,000 | 68,893,000 | 68,894,000 | 68,895,000 | 68,896,000 |
| 68,897,000 | 68,898,000 | 68,899,000 | 68,900,000 | 68,901,000 | 68,902,000 | 68,903,000 | 68,904,000 |
| 68,905,000 | 68,906,000 | 68,907,000 | 68,908,000 | 68,909,000 | 68,910,000 | 68,911,000 | 68,912,000 |
| 68,913,000 | 68,914,000 | 68,915,000 | 68,916,000 | 68,917,000 | 68,918,000 | 68,919,000 | 68,920,000 |
| 68,921,000 | 68,922,000 | 68,923,000 | 68,924,000 | 68,925,000 | 68,926,000 | 68,927,000 | 68,928,000 |
| 68,929,000 | 68,930,000 | 68,931,000 | 68,932,000 | 68,933,000 | 68,934,000 | 68,935,000 | 68,936,000 |
| 68,937,000 | 68,938,000 | 68,939,000 | 68,940,000 | 68,941,000 | 68,942,000 | 68,943,000 | 68,944,000 |
| 68,945,000 | 68,946,000 | 68,947,000 | 68,948,000 | 68,949,000 | 68,950,000 | 68,951,000 | 68,952,000 |

Supplemental Figure S8

|            |            |            |            |            |            |            |            |
|------------|------------|------------|------------|------------|------------|------------|------------|
| 68,953,000 | 68,954,000 | 68,955,000 | 68,956,000 | 68,957,000 | 68,958,000 | 68,959,000 | 68,960,000 |
| 68,961,000 | 68,962,000 | 68,963,000 | 68,964,000 | 68,965,000 | 68,966,000 | 68,967,000 | 68,968,000 |
| 68,969,000 | 68,970,000 | 68,971,000 | 68,972,000 | 68,973,000 | 68,974,000 | 68,975,000 | 68,976,000 |
| 68,977,000 | 68,978,000 | 68,979,000 | 68,980,000 | 68,981,000 | 68,982,000 | 68,983,000 | 68,984,000 |
| 68,985,000 | 68,986,000 | 68,987,000 | 68,988,000 | 68,989,000 | 68,990,000 | 68,991,000 | 68,992,000 |
| 68,993,000 | 68,994,000 | 68,995,000 | 68,996,000 | 68,997,000 | 68,998,000 | 68,999,000 | 69,000,000 |
| 69,001,000 | 69,002,000 | 69,003,000 | 69,004,000 | 69,005,000 | 69,006,000 | 69,007,000 | 69,008,000 |
| 69,009,000 | 69,010,000 | 69,011,000 | 69,012,000 | 69,013,000 | 69,014,000 | 69,015,000 | 69,016,000 |
| 69,017,000 | 69,018,000 | 69,019,000 | 69,020,000 | 69,021,000 | 69,022,000 | 69,023,000 | 69,024,000 |
| 69,025,000 | 69,026,000 | 69,027,000 | 69,028,000 | 69,029,000 | 69,030,000 | 69,031,000 | 69,032,000 |
| 69,033,000 | 69,034,000 | 69,035,000 | 69,036,000 | 69,037,000 | 69,038,000 | 69,039,000 | 69,040,000 |
| 69,041,000 | 69,042,000 | 69,043,000 | 69,044,000 | 69,045,000 | 69,046,000 | 69,047,000 | 69,048,000 |
| 69,049,000 | 69,050,000 | 69,051,000 | 69,052,000 | 69,053,000 | 69,054,000 | 69,055,000 | 69,056,000 |
| 69,057,000 | 69,058,000 | 69,059,000 | 69,060,000 | 69,061,000 | 69,062,000 | 69,063,000 | 69,064,000 |
| 69,065,000 | 69,066,000 | 69,067,000 | 69,068,000 | 69,069,000 | 69,070,000 | 69,071,000 | 69,072,000 |
| 69,073,000 | 69,074,000 | 69,075,000 | 69,076,000 | 69,077,000 | 69,078,000 | 69,079,000 | 69,080,000 |
| 69,081,000 | 69,082,000 | 69,083,000 | 69,084,000 | 69,085,000 | 69,086,000 | 69,087,000 | 69,088,000 |
| 69,089,000 | 69,090,000 | 69,091,000 | 69,092,000 | 69,093,000 | 69,094,000 | 69,095,000 | 69,096,000 |
| 69,097,000 | 69,098,000 | 69,099,000 | 69,100,000 | 69,101,000 | 69,102,000 | 69,103,000 | 69,104,000 |
| 69,105,000 | 69,106,000 | 69,107,000 | 69,108,000 | 69,109,000 | 69,110,000 | 69,111,000 | 69,112,000 |
| 69,113,000 | 69,114,000 | 69,115,000 | 69,116,000 | 69,117,000 | 69,118,000 | 69,119,000 | 69,120,000 |
| 69,121,000 | 69,122,000 | 69,123,000 | 69,124,000 | 69,125,000 | 69,126,000 | 69,127,000 | 69,128,000 |
| 69,129,000 | 69,130,000 | 69,131,000 | 69,132,000 | 69,133,000 | 69,134,000 | 69,135,000 | 69,136,000 |

Supplemental Figure S8

|            |            |            |            |            |            |            |            |
|------------|------------|------------|------------|------------|------------|------------|------------|
| 69,137,000 | 69,138,000 | 69,139,000 | 69,140,000 | 69,141,000 | 69,142,000 | 69,143,000 | 69,144,000 |
| 69,145,000 | 69,146,000 | 69,147,000 | 69,148,000 | 69,149,000 | 69,150,000 | 69,151,000 | 69,152,000 |
| 69,153,000 | 69,154,000 | 69,155,000 | 69,156,000 | 69,157,000 | 69,158,000 | 69,159,000 | 69,160,000 |
| 69,161,000 | 69,162,000 | 69,163,000 | 69,164,000 | 69,165,000 | 69,166,000 | 69,167,000 | 69,168,000 |
| 69,169,000 | 69,170,000 | 69,171,000 | 69,172,000 | 69,173,000 | 69,174,000 | 69,175,000 | 69,176,000 |
| 69,177,000 | 69,178,000 | 69,179,000 | 69,180,000 | 69,181,000 | 69,182,000 | 69,183,000 | 69,184,000 |
| 69,185,000 | 69,186,000 | 69,187,000 | 69,188,000 | 69,189,000 | 69,190,000 | 69,191,000 | 69,192,000 |
| 69,193,000 | 69,194,000 | 69,195,000 | 69,196,000 | 69,197,000 | 69,198,000 | 69,199,000 | 69,200,000 |
| 69,201,000 | 69,202,000 | 69,203,000 | 69,204,000 | 69,205,000 | 69,206,000 | 69,207,000 | 69,208,000 |
| 69,209,000 | 69,210,000 | 69,211,000 | 69,212,000 | 69,213,000 | 69,214,000 | 69,215,000 | 69,216,000 |
| 69,217,000 | 69,218,000 | 69,219,000 | 69,220,000 | 69,221,000 | 69,222,000 | 69,223,000 | 69,224,000 |
| 69,225,000 | 69,226,000 | 69,227,000 | 69,228,000 | 69,229,000 | 69,230,000 | 69,231,000 | 69,232,000 |
| 69,233,000 | 69,234,000 | 69,235,000 | 69,236,000 | 69,237,000 | 69,238,000 | 69,239,000 | 69,240,000 |
| 69,241,000 | 69,242,000 | 69,243,000 | 69,244,000 | 69,245,000 | 69,246,000 | 69,247,000 | 69,248,000 |
| 69,249,000 | 69,250,000 | 69,251,000 | 69,252,000 | 69,253,000 | 69,254,000 | 69,255,000 | 69,256,000 |
| 69,257,000 | 69,258,000 | 69,259,000 | 69,260,000 | 69,261,000 | 69,262,000 | 69,263,000 | 69,264,000 |
| 69,265,000 | 69,266,000 | 69,267,000 | 69,268,000 | 69,269,000 | 69,270,000 | 69,271,000 | 69,272,000 |
| 69,273,000 | 69,274,000 | 69,275,000 | 69,276,000 | 69,277,000 | 69,278,000 | 69,279,000 | 69,280,000 |
| 69,281,000 | 69,282,000 | 69,283,000 | 69,284,000 | 69,285,000 | 69,286,000 | 69,287,000 | 69,288,000 |
| 69,289,000 | 69,290,000 | 69,291,000 | 69,292,000 | 69,293,000 | 69,294,000 | 69,295,000 | 69,296,000 |
| 69,297,000 | 69,298,000 | 69,299,000 | 69,300,000 | 69,301,000 | 69,302,000 | 69,303,000 | 69,304,000 |
| 69,305,000 | 69,306,000 | 69,307,000 | 69,308,000 | 69,309,000 | 69,310,000 | 69,311,000 | 69,312,000 |
| 69,313,000 | 69,314,000 | 69,315,000 | 69,316,000 | 69,317,000 | 69,318,000 | 69,319,000 | 69,320,000 |



Supplemental Figure S8

|            |            |            |            |            |            |            |            |
|------------|------------|------------|------------|------------|------------|------------|------------|
| 69,321,000 | 69,322,000 | 69,323,000 | 69,324,000 | 69,325,000 | 69,326,000 | 69,327,000 | 69,328,000 |
| 69,329,000 | 69,330,000 | 69,331,000 | 69,332,000 | 69,333,000 | 69,334,000 | 69,335,000 | 69,336,000 |
| 69,337,000 | 69,338,000 | 69,339,000 | 69,340,000 | 69,341,000 | 69,342,000 | 69,343,000 | 69,344,000 |
| 69,345,000 | 69,346,000 | 69,347,000 | 69,348,000 | 69,349,000 | 69,350,000 | 69,351,000 | 69,352,000 |
| 69,353,000 | 69,354,000 | 69,355,000 | 69,356,000 | 69,357,000 | 69,358,000 | 69,359,000 | 69,360,000 |
| 69,361,000 | 69,362,000 | 69,363,000 | 69,364,000 | 69,365,000 | 69,366,000 | 69,367,000 | 69,368,000 |
| 69,369,000 | 69,370,000 | 69,371,000 | 69,372,000 | 69,373,000 | 69,374,000 | 69,375,000 | 69,376,000 |
| 69,377,000 | 69,378,000 | 69,379,000 | 69,380,000 | 69,381,000 | 69,382,000 | 69,383,000 | 69,384,000 |
| 69,385,000 | 69,386,000 | 69,387,000 | 69,388,000 | 69,389,000 | 69,390,000 | 69,391,000 | 69,392,000 |
| 69,393,000 | 69,394,000 | 69,395,000 | 69,396,000 | 69,397,000 | 69,398,000 | 69,399,000 | 69,400,000 |
| 69,401,000 | 69,402,000 | 69,403,000 | 69,404,000 | 69,405,000 | 69,406,000 | 69,407,000 | 69,408,000 |
| 69,409,000 | 69,410,000 | 69,411,000 | 69,412,000 | 69,413,000 | 69,414,000 | 69,415,000 | 69,416,000 |
| 69,417,000 | 69,418,000 | 69,419,000 | 69,420,000 | 69,421,000 | 69,422,000 | 69,423,000 | 69,424,000 |
| 69,425,000 | 69,426,000 | 69,427,000 | 69,428,000 | 69,429,000 | 69,430,000 | 69,431,000 | 69,432,000 |
| 69,433,000 | 69,434,000 | 69,435,000 | 69,436,000 | 69,437,000 | 69,438,000 | 69,439,000 | 69,440,000 |
| 69,441,000 | 69,442,000 | 69,443,000 | 69,444,000 | 69,445,000 | 69,446,000 | 69,447,000 | 69,448,000 |
| 69,449,000 | 69,450,000 | 69,451,000 | 69,452,000 | 69,453,000 | 69,454,000 | 69,455,000 | 69,456,000 |
| 69,457,000 | 69,458,000 | 69,459,000 | 69,460,000 | 69,461,000 | 69,462,000 | 69,463,000 | 69,464,000 |
| 69,465,000 | 69,466,000 | 69,467,000 | 69,468,000 | 69,469,000 | 69,470,000 | 69,471,000 | 69,472,000 |
| 69,473,000 | 69,474,000 | 69,475,000 | 69,476,000 | 69,477,000 | 69,478,000 | 69,479,000 | 69,480,000 |
| 69,481,000 | 69,482,000 | 69,483,000 | 69,484,000 | 69,485,000 | 69,486,000 | 69,487,000 | 69,488,000 |
| 69,489,000 | 69,490,000 | 69,491,000 | 69,492,000 | 69,493,000 | 69,494,000 | 69,495,000 | 69,496,000 |
| 69,497,000 | 69,498,000 | 69,499,000 | 69,500,000 | 69,501,000 | 69,502,000 | 69,503,000 | 69,504,000 |

Supplemental Figure S8

|            |            |            |            |            |            |            |            |
|------------|------------|------------|------------|------------|------------|------------|------------|
| 69,505,000 | 69,506,000 | 69,507,000 | 69,508,000 | 69,509,000 | 69,510,000 | 69,511,000 | 69,512,000 |
| 69,513,000 | 69,514,000 | 69,515,000 | 69,516,000 | 69,517,000 | 69,518,000 | 69,519,000 | 69,520,000 |
| 69,521,000 | 69,522,000 | 69,523,000 | 69,524,000 | 69,525,000 | 69,526,000 | 69,527,000 | 69,528,000 |
| 69,529,000 | 69,530,000 | 69,531,000 | 69,532,000 | 69,533,000 | 69,534,000 | 69,535,000 | 69,536,000 |
| 69,537,000 | 69,538,000 | 69,539,000 | 69,540,000 | 69,541,000 | 69,542,000 | 69,543,000 | 69,544,000 |
| 69,545,000 | 69,546,000 | 69,547,000 | 69,548,000 | 69,549,000 | 69,550,000 | 69,551,000 | 69,552,000 |
| 69,553,000 | 69,554,000 | 69,555,000 | 69,556,000 | 69,557,000 | 69,558,000 | 69,559,000 | 69,560,000 |
| 69,561,000 | 69,562,000 | 69,563,000 | 69,564,000 | 69,565,000 | 69,566,000 | 69,567,000 | 69,568,000 |
| 69,569,000 | 69,570,000 | 69,571,000 | 69,572,000 | 69,573,000 | 69,574,000 | 69,575,000 | 69,576,000 |
| 69,577,000 | 69,578,000 | 69,579,000 | 69,580,000 | 69,581,000 | 69,582,000 | 69,583,000 | 69,584,000 |
| 69,585,000 | 69,586,000 | 69,587,000 | 69,588,000 | 69,589,000 | 69,590,000 | 69,591,000 | 69,592,000 |
| 69,593,000 | 69,594,000 | 69,595,000 | 69,596,000 | 69,597,000 | 69,598,000 | 69,599,000 | 69,600,000 |
| 69,601,000 | 69,602,000 | 69,603,000 | 69,604,000 | 69,605,000 | 69,606,000 | 69,607,000 | 69,608,000 |
| 69,609,000 | 69,610,000 | 69,611,000 | 69,612,000 | 69,613,000 | 69,614,000 | 69,615,000 | 69,616,000 |
| 69,617,000 | 69,618,000 | 69,619,000 | 69,620,000 | 69,621,000 | 69,622,000 | 69,623,000 | 69,624,000 |
| 69,625,000 | 69,626,000 | 69,627,000 | 69,628,000 | 69,629,000 | 69,630,000 | 69,631,000 | 69,632,000 |
| 69,633,000 | 69,634,000 | 69,635,000 | 69,636,000 | 69,637,000 | 69,638,000 | 69,639,000 | 69,640,000 |
| 69,641,000 | 69,642,000 | 69,643,000 | 69,644,000 | 69,645,000 | 69,646,000 | 69,647,000 | 69,648,000 |
| 69,649,000 | 69,650,000 | 69,651,000 | 69,652,000 | 69,653,000 | 69,654,000 | 69,655,000 | 69,656,000 |
| 69,657,000 | 69,658,000 | 69,659,000 | 69,660,000 | 69,661,000 | 69,662,000 | 69,663,000 | 69,664,000 |
| 69,665,000 | 69,666,000 | 69,667,000 | 69,668,000 | 69,669,000 | 69,670,000 | 69,671,000 | 69,672,000 |
| 69,673,000 | 69,674,000 | 69,675,000 | 69,676,000 | 69,677,000 | 69,678,000 | 69,679,000 | 69,680,000 |
| 69,681,000 | 69,682,000 | 69,683,000 | 69,684,000 | 69,685,000 | 69,686,000 | 69,687,000 | 69,688,000 |

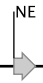

Supplemental Figure S8

|            |            |            |            |            |            |            |            |
|------------|------------|------------|------------|------------|------------|------------|------------|
| 69,689,000 | 69,690,000 | 69,691,000 | 69,692,000 | 69,693,000 | 69,694,000 | 69,695,000 | 69,696,000 |
| 69,697,000 | 69,698,000 | 69,699,000 | 69,700,000 | 69,701,000 | 69,702,000 | 69,703,000 | 69,704,000 |
| 69,705,000 | 69,706,000 | 69,707,000 | 69,708,000 | 69,709,000 | 69,710,000 | 69,711,000 | 69,712,000 |
| 69,713,000 | 69,714,000 | 69,715,000 | 69,716,000 | 69,717,000 | 69,718,000 | 69,719,000 | 69,720,000 |
| 69,721,000 | 69,722,000 | 69,723,000 | 69,724,000 | 69,725,000 | 69,726,000 | 69,727,000 | 69,728,000 |
| 69,729,000 | 69,730,000 | 69,731,000 | 69,732,000 | 69,733,000 | 69,734,000 | 69,735,000 | 69,736,000 |
| 69,737,000 | 69,738,000 | 69,739,000 | 69,740,000 | 69,741,000 | 69,742,000 | 69,743,000 | 69,744,000 |
| 69,745,000 | 69,746,000 | 69,747,000 | 69,748,000 | 69,749,000 | 69,750,000 | 69,751,000 | 69,752,000 |
| 69,753,000 | 69,754,000 | 69,755,000 | 69,756,000 | 69,757,000 | 69,758,000 | 69,759,000 | 69,760,000 |
| 69,761,000 | 69,762,000 | 69,763,000 | 69,764,000 | 69,765,000 | 69,766,000 | 69,767,000 | 69,768,000 |
| 69,769,000 | 69,770,000 | 69,771,000 | 69,772,000 | 69,773,000 | 69,774,000 | 69,775,000 | 69,776,000 |
| 69,777,000 | 69,778,000 | 69,779,000 | 69,780,000 | 69,781,000 | 69,782,000 | 69,783,000 | 69,784,000 |
| 69,785,000 | 69,786,000 | 69,787,000 | 69,788,000 | 69,789,000 | 69,790,000 | 69,791,000 | 69,792,000 |
| 69,793,000 | 69,794,000 | 69,795,000 | 69,796,000 | 69,797,000 | 69,798,000 | 69,799,000 | 69,800,000 |
| 69,801,000 | 69,802,000 | 69,803,000 | 69,804,000 | 69,805,000 | 69,806,000 | 69,807,000 | 69,808,000 |
| 69,809,000 | 69,810,000 | 69,811,000 | 69,812,000 | 69,813,000 | 69,814,000 | 69,815,000 | 69,816,000 |
| 69,817,000 | 69,818,000 | 69,819,000 | 69,820,000 | 69,821,000 | 69,822,000 | 69,823,000 | 69,824,000 |
| 69,825,000 | 69,826,000 | 69,827,000 | 69,828,000 | 69,829,000 | 69,830,000 | 69,831,000 | 69,832,000 |
| 69,833,000 | 69,834,000 | 69,835,000 | 69,836,000 | 69,837,000 | 69,838,000 | 69,839,000 | 69,840,000 |
| 69,841,000 | 69,842,000 | 69,843,000 | 69,844,000 | 69,845,000 | 69,846,000 | 69,847,000 | 69,848,000 |
| 69,849,000 | 69,850,000 | 69,851,000 | 69,852,000 | 69,853,000 | 69,854,000 | 69,855,000 | 69,856,000 |

NE

NE

NE

Supplemental Figure S8

|            |            |            |            |            |            |            |            |
|------------|------------|------------|------------|------------|------------|------------|------------|
| 69,857,000 | 69,858,000 | 69,859,000 | 69,860,000 | 69,861,000 | 69,862,000 | 69,863,000 | 69,864,000 |
| 69,865,000 | 69,866,000 | 69,867,000 | 69,868,000 | 69,869,000 | 69,870,000 | 69,871,000 | 69,872,000 |
| 69,873,000 | 69,874,000 | 69,875,000 | 69,876,000 | 69,877,000 | 69,878,000 | 69,879,000 | 69,880,000 |
| 69,881,000 | 69,882,000 | 69,883,000 | 69,884,000 | 69,885,000 | 69,886,000 | 69,887,000 | 69,888,000 |
| 69,889,000 | 69,890,000 | 69,891,000 | 69,892,000 | 69,893,000 | 69,894,000 | 69,895,000 | 69,896,000 |
| 69,897,000 | 69,898,000 | 69,899,000 | 69,900,000 | 69,901,000 | 69,902,000 | 69,903,000 | 69,904,000 |
| 69,905,000 | 69,906,000 | 69,907,000 | 69,908,000 | 69,909,000 | 69,910,000 | 69,911,000 | 69,912,000 |
| 69,913,000 | 69,914,000 | 69,915,000 | 69,916,000 | 69,917,000 | 69,918,000 | 69,919,000 | 69,920,000 |
| 69,921,000 | 69,922,000 | 69,923,000 | 69,924,000 | 69,925,000 | 69,926,000 | 69,927,000 | 69,928,000 |
| 69,929,000 | 69,930,000 | 69,931,000 | 69,932,000 | 69,933,000 | 69,934,000 | 69,935,000 | 69,936,000 |
| 69,937,000 | 69,938,000 | 69,939,000 | 69,940,000 | 69,941,000 | 69,942,000 | 69,943,000 | 69,944,000 |
| 69,945,000 | 69,946,000 | 69,947,000 | 69,948,000 | 69,949,000 | 69,950,000 | 69,951,000 | 69,952,000 |
| 69,953,000 | 69,954,000 | 69,955,000 | 69,956,000 | 69,957,000 | 69,958,000 | 69,959,000 | 69,960,000 |
| 69,961,000 | 69,962,000 | 69,963,000 | 69,964,000 | 69,965,000 | 69,966,000 | 69,967,000 | 69,968,000 |
| 69,969,000 | 69,970,000 | 69,971,000 | 69,972,000 | 69,973,000 | 69,974,000 | 69,975,000 | 69,976,000 |
| 69,977,000 | 69,978,000 | 69,979,000 | 69,980,000 | 69,981,000 | 69,982,000 | 69,983,000 | 69,984,000 |
| 69,985,000 | 69,986,000 | 69,987,000 | 69,988,000 | 69,989,000 | 69,990,000 | 69,991,000 | 69,992,000 |
| 69,993,000 | 69,994,000 | 69,995,000 | 69,996,000 | 69,997,000 | 69,998,000 | 69,999,000 | 70,000,000 |
| 70,001,000 | 70,002,000 | 70,003,000 | 70,004,000 | 70,005,000 | 70,006,000 | 70,007,000 | 70,008,000 |
| 70,009,000 | 70,010,000 | 70,011,000 | 70,012,000 | 70,013,000 | 70,014,000 | 70,015,000 | 70,016,000 |
| 70,017,000 | 70,018,000 | 70,019,000 | 70,020,000 | 70,021,000 | 70,022,000 | 70,023,000 | 70,024,000 |
| 70,025,000 | 70,026,000 | 70,027,000 | 70,028,000 | 70,029,000 | 70,030,000 | 70,031,000 | 70,032,000 |
| 70,033,000 | 70,034,000 | 70,035,000 | 70,036,000 | 70,037,000 | 70,038,000 | 70,039,000 | 70,040,000 |

38

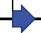

Supplemental Figure S8

|                  |            |            |            |            |            |            |            |
|------------------|------------|------------|------------|------------|------------|------------|------------|
| 70,041,000       | 70,042,000 | 70,043,000 | 70,044,000 | 70,045,000 | 70,046,000 | 70,047,000 | 70,048,000 |
| 70,049,000       | 70,050,000 | 70,051,000 | 70,052,000 | 70,053,000 | 70,054,000 | 70,055,000 | 70,056,000 |
| 70,057,000       | 70,058,000 | 70,059,000 | 70,060,000 | 70,061,000 | 70,062,000 | 70,063,000 | 70,064,000 |
| 70,065,000       | 70,066,000 | 70,067,000 | 70,068,000 | 70,069,000 | 70,070,000 | 70,071,000 | 70,072,000 |
| 70,073,000       | 70,074,000 | 70,075,000 | 70,076,000 | 70,077,000 | 70,078,000 | 70,079,000 | 70,080,000 |
| 70,081,000       | 70,082,000 | 70,083,000 | 70,084,000 | 70,085,000 | 70,086,000 | 70,087,000 | 70,088,000 |
| 70,089,000       | 70,090,000 | 70,091,000 | 70,092,000 | 70,093,000 | 70,094,000 | 70,095,000 | 70,096,000 |
| 70,097,000       | 70,098,000 | 70,099,000 | 70,100,000 | 70,101,000 | 70,102,000 | 70,103,000 | 70,104,000 |
| 70,105,000       | 70,106,000 | 70,107,000 | 70,108,000 | 70,109,000 | 70,110,000 | 70,111,000 | 70,112,000 |
| 70,113,000       | 70,114,000 | 70,115,000 | 70,116,000 | 70,117,000 | 70,118,000 | 70,119,000 | 70,120,000 |
| 70,121,000       | 70,122,000 | 70,123,000 | 70,124,000 | 70,125,000 | 70,126,000 | 70,127,000 | 70,128,000 |
| 70,129,000       | 70,130,000 | 70,131,000 | 70,132,000 | 70,133,000 | 70,134,000 | 70,135,000 | 70,136,000 |
| NE<br>70,137,000 | 70,138,000 | 70,139,000 | 70,140,000 | 70,141,000 | 70,142,000 | 70,143,000 | 70,144,000 |
| 70,145,000       | 70,146,000 | 70,147,000 | 70,148,000 | 70,149,000 | 70,150,000 | 70,151,000 | 70,152,000 |
| 70,153,000       | 70,154,000 | 70,155,000 | 70,156,000 | 70,157,000 | 70,158,000 | 70,159,000 | 70,160,000 |
| 70,161,000       | 70,162,000 | 70,163,000 | 70,164,000 | 70,165,000 | 70,166,000 | 70,167,000 | 70,168,000 |
| 70,169,000       | 70,170,000 | 70,171,000 | 70,172,000 | 70,173,000 | 70,174,000 | 70,175,000 | 70,176,000 |
| 70,177,000       | 70,178,000 | 70,179,000 | 70,180,000 | 70,181,000 | 70,182,000 | 70,183,000 | 70,184,000 |
| 70,185,000       | 70,186,000 | 70,187,000 | 70,188,000 | 70,189,000 | 70,190,000 | 70,191,000 | 70,192,000 |
| 70,193,000       | 70,194,000 | 70,195,000 | 70,196,000 | 70,197,000 | 70,198,000 | 70,199,000 | 70,200,000 |
| 70,201,000       | 70,202,000 | 70,203,000 | 70,204,000 | 70,205,000 | 70,206,000 | 70,207,000 | 70,208,000 |
| 70,209,000       | 70,210,000 | 70,211,000 | 70,212,000 | 70,213,000 | 70,214,000 | 70,215,000 | 70,216,000 |
| 70,217,000       | 70,218,000 | 70,219,000 | 70,220,000 | 70,221,000 | 70,222,000 | 70,223,000 | 70,224,000 |

Supplemental Figure S8

|            |            |            |            |            |            |            |            |
|------------|------------|------------|------------|------------|------------|------------|------------|
| 70,225,000 | 70,226,000 | 70,227,000 | 70,228,000 | 70,229,000 | 70,230,000 | 70,231,000 | 70,232,000 |
| 70,233,000 | 70,234,000 | 70,235,000 | 70,236,000 | 70,237,000 | 70,238,000 | 70,239,000 | 70,240,000 |
| 70,241,000 | 70,242,000 | 70,243,000 | 70,244,000 | 70,245,000 | 70,246,000 | 70,247,000 | 70,248,000 |
| 70,249,000 | 70,250,000 | 70,251,000 | 70,252,000 | 70,253,000 | 70,254,000 | 70,255,000 | 70,256,000 |
| 70,257,000 | 70,258,000 | 70,259,000 | 70,260,000 | 70,261,000 | 70,262,000 | 70,263,000 | 70,264,000 |
| 70,265,000 | 70,266,000 | 70,267,000 | 70,268,000 | 70,269,000 | 70,270,000 | 70,271,000 | 70,272,000 |
| 70,273,000 | 70,274,000 | 70,275,000 | 70,276,000 | 70,277,000 | 70,278,000 | 70,279,000 | 70,280,000 |
| 70,281,000 | 70,282,000 | 70,283,000 | 70,284,000 | 70,285,000 | 70,286,000 | 70,287,000 | 70,288,000 |
| 70,289,000 | 70,290,000 | 70,291,000 | 70,292,000 | 70,293,000 | 70,294,000 | 70,295,000 | 70,296,000 |
| 70,297,000 | 70,298,000 | 70,299,000 | 70,300,000 | 70,301,000 | 70,302,000 | 70,303,000 | 70,304,000 |
| 70,305,000 | 70,306,000 | 70,307,000 | 70,308,000 | 70,309,000 | 70,310,000 | 70,311,000 | 70,312,000 |
| 70,313,000 | 70,314,000 | 70,315,000 | 70,316,000 | 70,317,000 | 70,318,000 | 70,319,000 | 70,320,000 |
| 70,321,000 | 70,322,000 | 70,323,000 | 70,324,000 | 70,325,000 | 70,326,000 | 70,327,000 | 70,328,000 |
| 70,329,000 | 70,330,000 | 70,331,000 | 70,332,000 | 70,333,000 | 70,334,000 | 70,335,000 | 70,336,000 |
| 70,337,000 | 70,338,000 | 70,339,000 | 70,340,000 | 70,341,000 | 70,342,000 | 70,343,000 | 70,344,000 |
| 70,345,000 | 70,346,000 | 70,347,000 | 70,348,000 | 70,349,000 | 70,350,000 | 70,351,000 | 70,352,000 |
| 70,353,000 | 70,354,000 | 70,355,000 | 70,356,000 | 70,357,000 | 70,358,000 | 70,359,000 | 70,360,000 |
| 70,361,000 | 70,362,000 | 70,363,000 | 70,364,000 | 70,365,000 | 70,366,000 | 70,367,000 | 70,368,000 |
| 70,369,000 | 70,370,000 | 70,371,000 | 70,372,000 | 70,373,000 | 70,374,000 | 70,375,000 | 70,376,000 |
| 70,377,000 | 70,378,000 | 70,379,000 | 70,380,000 | 70,381,000 | 70,382,000 | 70,383,000 | 70,384,000 |
| 70,385,000 | 70,386,000 | 70,387,000 | 70,388,000 | 70,389,000 | 70,390,000 | 70,391,000 | 70,392,000 |
| 70,393,000 | 70,394,000 | 70,395,000 | 70,396,000 | 70,397,000 | 70,398,000 | 70,399,000 | 70,400,000 |
| 70,401,000 | 70,402,000 | 70,403,000 | 70,404,000 | 70,405,000 | 70,406,000 | 70,407,000 | 70,408,000 |

38

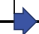

Supplemental Figure S8

|            |            |            |            |            |            |            |            |
|------------|------------|------------|------------|------------|------------|------------|------------|
| 70,409,000 | 70,410,000 | 70,411,000 | 70,412,000 | 70,413,000 | 70,414,000 | 70,415,000 | 70,416,000 |
| 70,417,000 | 70,418,000 | 70,419,000 | 70,420,000 | 70,421,000 | 70,422,000 | 70,423,000 | 70,424,000 |
| 70,425,000 | 70,426,000 | 70,427,000 | 70,428,000 | 70,429,000 | 70,430,000 | 70,431,000 | 70,432,000 |
| 70,433,000 | 70,434,000 | 70,435,000 | 70,436,000 | 70,437,000 | 70,438,000 | 70,439,000 | 70,440,000 |
| 70,441,000 | 70,442,000 | 70,443,000 | 70,444,000 | 70,445,000 | 70,446,000 | 70,447,000 | 70,448,000 |
| 70,449,000 | 70,450,000 | 70,451,000 | 70,452,000 | 70,453,000 | 70,454,000 | 70,455,000 | 70,456,000 |
| 70,457,000 | 70,458,000 | 70,459,000 | 70,460,000 | 70,461,000 | 70,462,000 | 70,463,000 | 70,464,000 |
| 70,465,000 | 70,466,000 | 70,467,000 | 70,468,000 | 70,469,000 | 70,470,000 | 70,471,000 | 70,472,000 |
| 70,473,000 | 70,474,000 | 70,475,000 | 70,476,000 | 70,477,000 | 70,478,000 | 70,479,000 | 70,480,000 |
| 70,481,000 | 70,482,000 | 70,483,000 | 70,484,000 | 70,485,000 | 70,486,000 | 70,487,000 | 70,488,000 |
| 70,489,000 | 70,490,000 | 70,491,000 | 70,492,000 | 70,493,000 | 70,494,000 | 70,495,000 | 70,496,000 |
| 70,497,000 | 70,498,000 | 70,499,000 | 70,500,000 | 70,501,000 | 70,502,000 | 70,503,000 | 70,504,000 |
| 70,505,000 | 70,506,000 | 70,507,000 | 70,508,000 | 70,509,000 | 70,510,000 | 70,511,000 | 70,512,000 |
| 70,513,000 | 70,514,000 | 70,515,000 | 70,516,000 | 70,517,000 | 70,518,000 | 70,519,000 | 70,520,000 |
| 70,521,000 | 70,522,000 | 70,523,000 | 70,524,000 | 70,525,000 | 70,526,000 | 70,527,000 | 70,528,000 |
| 70,529,000 | 70,530,000 | 70,531,000 | 70,532,000 | 70,533,000 | 70,534,000 | 70,535,000 | 70,536,000 |
| 70,537,000 | 70,538,000 | 70,539,000 | 70,540,000 | 70,541,000 | 70,542,000 | 70,543,000 | 70,544,000 |
| 70,545,000 | 70,546,000 | 70,547,000 | 70,548,000 | 70,549,000 | 70,550,000 | 70,551,000 | 70,552,000 |
| 70,553,000 | 70,554,000 | 70,555,000 | 70,556,000 | 70,557,000 | 70,558,000 | 70,559,000 | 70,560,000 |
| 70,561,000 | 70,562,000 | 70,563,000 | 70,564,000 | 70,565,000 | 70,566,000 | 70,567,000 | 70,568,000 |
| 70,569,000 | 70,570,000 | 70,571,000 | 70,572,000 | 70,573,000 | 70,574,000 | 70,575,000 | 70,576,000 |
| 70,577,000 | 70,578,000 | 70,579,000 | 70,580,000 | 70,581,000 | 70,582,000 | 70,583,000 | 70,584,000 |
| 70,585,000 | 70,586,000 | 70,587,000 | 70,588,000 | 70,589,000 | 70,590,000 | 70,591,000 | 70,592,000 |

Supplemental Figure S8

|                  |                  |            |            |            |            |            |            |
|------------------|------------------|------------|------------|------------|------------|------------|------------|
| 70,593,000       | 70,594,000       | 70,595,000 | 70,596,000 | 70,597,000 | 70,598,000 | 70,599,000 | 70,600,000 |
| 70,601,000       | 70,602,000       | 70,603,000 | 70,604,000 | 70,605,000 | 70,606,000 | 70,607,000 | 70,608,000 |
| 70,609,000       | 70,610,000       | 70,611,000 | 70,612,000 | 70,613,000 | 70,614,000 | 70,615,000 | 70,616,000 |
| NE<br>70,617,000 | 70,618,000       | 70,619,000 | 70,620,000 | 70,621,000 | 70,622,000 | 70,623,000 | 70,624,000 |
| 70,625,000       | 70,626,000       | 70,627,000 | 70,628,000 | 70,629,000 | 70,630,000 | 70,631,000 | 70,632,000 |
| 70,633,000       | 70,634,000       | 70,635,000 | 70,636,000 | 70,637,000 | 70,638,000 | 70,639,000 | 70,640,000 |
| 70,641,000       | 70,642,000       | 70,643,000 | 70,644,000 | 70,645,000 | 70,646,000 | 70,647,000 | 70,648,000 |
| 70,649,000       | 70,650,000       | 70,651,000 | 70,652,000 | 70,653,000 | 70,654,000 | 70,655,000 | 70,656,000 |
| 70,657,000       | 70,658,000       | 70,659,000 | 70,660,000 | 70,661,000 | 70,662,000 | 70,663,000 | 70,664,000 |
| 70,665,000       | 70,666,000       | 70,667,000 | 70,668,000 | 70,669,000 | 70,670,000 | 70,671,000 | 70,672,000 |
| 70,673,000       | 70,674,000       | 70,675,000 | 70,676,000 | 70,677,000 | 70,678,000 | 70,679,000 | 70,680,000 |
| 70,681,000       | 70,682,000       | 70,683,000 | 70,684,000 | 70,685,000 | 70,686,000 | 70,687,000 | 70,688,000 |
| 70,689,000       | 70,690,000       | 70,691,000 | 70,692,000 | 70,693,000 | 70,694,000 | 70,695,000 | 70,696,000 |
| 70,697,000       | 70,698,000       | 70,699,000 | 70,700,000 | 70,701,000 | 70,702,000 | 70,703,000 | 70,704,000 |
| 70,705,000       | 70,706,000       | 70,707,000 | 70,708,000 | 70,709,000 | 70,710,000 | 70,711,000 | 70,712,000 |
| 70,713,000       | 70,714,000       | 70,715,000 | 70,716,000 | 70,717,000 | 70,718,000 | 70,719,000 | 70,720,000 |
| 70,721,000       | 70,722,000       | 70,723,000 | 70,724,000 | 70,725,000 | 70,726,000 | 70,727,000 | 70,728,000 |
| 70,729,000       | 70,730,000       | 70,731,000 | 70,732,000 | 70,733,000 | 70,734,000 | 70,735,000 | 70,736,000 |
| 70,737,000       | 70,738,000       | 70,739,000 | 70,740,000 | 70,741,000 | 70,742,000 | 70,743,000 | 70,744,000 |
| 70,745,000       | 70,746,000       | 70,747,000 | 70,748,000 | 70,749,000 | 70,750,000 | 70,751,000 | 70,752,000 |
| 70,753,000       | 70,754,000       | 70,755,000 | 70,756,000 | 70,757,000 | 70,758,000 | 70,759,000 | 70,760,000 |
| 70,761,000       | NE<br>70,762,000 | 70,763,000 | 70,764,000 | 70,765,000 | 70,766,000 | 70,767,000 | 70,768,000 |



Supplemental Figure S8

|            |            |            |            |            |            |            |            |
|------------|------------|------------|------------|------------|------------|------------|------------|
| 70,769,000 | 70,770,000 | 70,771,000 | 70,772,000 | 70,773,000 | 70,774,000 | 70,775,000 | 70,776,000 |
| 70,777,000 | 70,778,000 | 70,779,000 | 70,780,000 | 70,781,000 | 70,782,000 | 70,783,000 | 70,784,000 |
| 70,785,000 | 70,786,000 | 70,787,000 | 70,788,000 | 70,789,000 | 70,790,000 | 70,791,000 | 70,792,000 |
| 70,793,000 | 70,794,000 | 70,795,000 | 70,796,000 | 70,797,000 | 70,798,000 | 70,799,000 | 70,800,000 |
| 70,801,000 | 70,802,000 | 70,803,000 | 70,804,000 | 70,805,000 | 70,806,000 | 70,807,000 | 70,808,000 |
| 70,809,000 | 70,810,000 | 70,811,000 | 70,812,000 | 70,813,000 | 70,814,000 | 70,815,000 | 70,816,000 |
| 70,817,000 | 70,818,000 | 70,819,000 | 70,820,000 | 70,821,000 | 70,822,000 | 70,823,000 | 70,824,000 |
| 70,825,000 | 70,826,000 | 70,827,000 | 70,828,000 | 70,829,000 | 70,830,000 | 70,831,000 | 70,832,000 |
| 70,833,000 | 70,834,000 | 70,835,000 | 70,836,000 | 70,837,000 | 70,838,000 | 70,839,000 | 70,840,000 |
| 70,841,000 | 70,842,000 | 70,843,000 | 70,844,000 | 70,845,000 | 70,846,000 | 70,847,000 | 70,848,000 |
| 70,849,000 | 70,850,000 | 70,851,000 | 70,852,000 | 70,853,000 | 70,854,000 | 70,855,000 | 70,856,000 |
| 70,857,000 | 70,858,000 | 70,859,000 | 70,860,000 | 70,861,000 | 70,862,000 | 70,863,000 | 70,864,000 |
| 70,865,000 | 70,866,000 | 70,867,000 | 70,868,000 | 70,869,000 | 70,870,000 | 70,871,000 | 70,872,000 |
| 70,873,000 | 70,874,000 | 70,875,000 | 70,876,000 | 70,877,000 | 70,878,000 | 70,879,000 | 70,880,000 |
| 70,881,000 | 70,882,000 | 70,883,000 | 70,884,000 | 70,885,000 | 70,886,000 | 70,887,000 | 70,888,000 |
| 70,889,000 | 70,890,000 | 70,891,000 | 70,892,000 | 70,893,000 | 70,894,000 | 70,895,000 | 70,896,000 |
| 70,897,000 | 70,898,000 | 70,899,000 | 70,900,000 | 70,901,000 | 70,902,000 | 70,903,000 | 70,904,000 |
| 70,905,000 | 70,906,000 | 70,907,000 | 70,908,000 | 70,909,000 | 70,910,000 | 70,911,000 | 70,912,000 |
| 70,913,000 | 70,914,000 | 70,915,000 | 70,916,000 | 70,917,000 | 70,918,000 | 70,919,000 | 70,920,000 |
| 70,921,000 | 70,922,000 | 70,923,000 | 70,924,000 | 70,925,000 | 70,926,000 | 70,927,000 | 70,928,000 |
| 70,929,000 | 70,930,000 | 70,931,000 | 70,932,000 | 70,933,000 | 70,934,000 | 70,935,000 | 70,936,000 |
| 70,937,000 | 70,938,000 | 70,939,000 | 70,940,000 | 70,941,000 | 70,942,000 | 70,943,000 | 70,944,000 |
| 70,945,000 | 70,946,000 | 70,947,000 | 70,948,000 | 70,949,000 | 70,950,000 | 70,951,000 | 70,952,000 |

NE

Supplemental Figure S8

|            |            |            |            |            |            |            |            |
|------------|------------|------------|------------|------------|------------|------------|------------|
| 70,953,000 | 70,954,000 | 70,955,000 | 70,956,000 | 70,957,000 | 70,958,000 | 70,959,000 | 70,960,000 |
| 70,961,000 | 70,962,000 | 70,963,000 | 70,964,000 | 70,965,000 | 70,966,000 | 70,967,000 | 70,968,000 |
| 70,969,000 | 70,970,000 | 70,971,000 | 70,972,000 | 70,973,000 | 70,974,000 | 70,975,000 | 70,976,000 |
| 70,977,000 | 70,978,000 | 70,979,000 | 70,980,000 | 70,981,000 | 70,982,000 | 70,983,000 | 70,984,000 |
| 70,985,000 | 70,986,000 | 70,987,000 | 70,988,000 | 70,989,000 | 70,990,000 | 70,991,000 | 70,992,000 |
| 70,993,000 | 70,994,000 | 70,995,000 | 70,996,000 | 70,997,000 | 70,998,000 | 70,999,000 | 71,000,000 |
| 71,001,000 | 71,002,000 | 71,003,000 | 71,004,000 | 71,005,000 | 71,006,000 | 71,007,000 | 71,008,000 |
| 71,009,000 | 71,010,000 | 71,011,000 | 71,012,000 | 71,013,000 | 71,014,000 | 71,015,000 | 71,016,000 |
| 71,017,000 | 71,018,000 | 71,019,000 | 71,020,000 | 71,021,000 | 71,022,000 | 71,023,000 | 71,024,000 |
| 71,025,000 | 71,026,000 | 71,027,000 | 71,028,000 | 71,029,000 | 71,030,000 | 71,031,000 | 71,032,000 |
| 71,033,000 | 71,034,000 | 71,035,000 | 71,036,000 | 71,037,000 | 71,038,000 | 71,039,000 | 71,040,000 |
| 71,041,000 | 71,042,000 | 71,043,000 | 71,044,000 | 71,045,000 | 71,046,000 | 71,047,000 | 71,048,000 |
| 71,049,000 | 71,050,000 | 71,051,000 | 71,052,000 | 71,053,000 | 71,054,000 | 71,055,000 | 71,056,000 |
| 71,057,000 | 71,058,000 | 71,059,000 | 71,060,000 | 71,061,000 | 71,062,000 | 71,063,000 | 71,064,000 |
| 71,065,000 | 71,066,000 | 71,067,000 | 71,068,000 | 71,069,000 | 71,070,000 | 71,071,000 | 71,072,000 |
| 71,073,000 | 71,074,000 | 71,075,000 | 71,076,000 | 71,077,000 | 71,078,000 | 71,079,000 | 71,080,000 |
| 71,081,000 | 71,082,000 | 71,083,000 | 71,084,000 | 71,085,000 | 71,086,000 | 71,087,000 | 71,088,000 |
| 71,089,000 | 71,090,000 | 71,091,000 | 71,092,000 | 71,093,000 | 71,094,000 | 71,095,000 | 71,096,000 |
| 71,097,000 | 71,098,000 | 71,099,000 | 71,100,000 | 71,101,000 | 71,102,000 | 71,103,000 | 71,104,000 |
| 71,105,000 | 71,106,000 | 71,107,000 | 71,108,000 | 71,109,000 | 71,110,000 | 71,111,000 | 71,112,000 |
| 71,113,000 | 71,114,000 | 71,115,000 | 71,116,000 | 71,117,000 | 71,118,000 | 71,119,000 | 71,120,000 |
| 71,121,000 | 71,122,000 | 71,123,000 | 71,124,000 | 71,125,000 | 71,126,000 | 71,127,000 | 71,128,000 |
| 71,129,000 | 71,130,000 | 71,131,000 | 71,132,000 | 71,133,000 | 71,134,000 | 71,135,000 | 71,136,000 |

Supplemental Figure S8

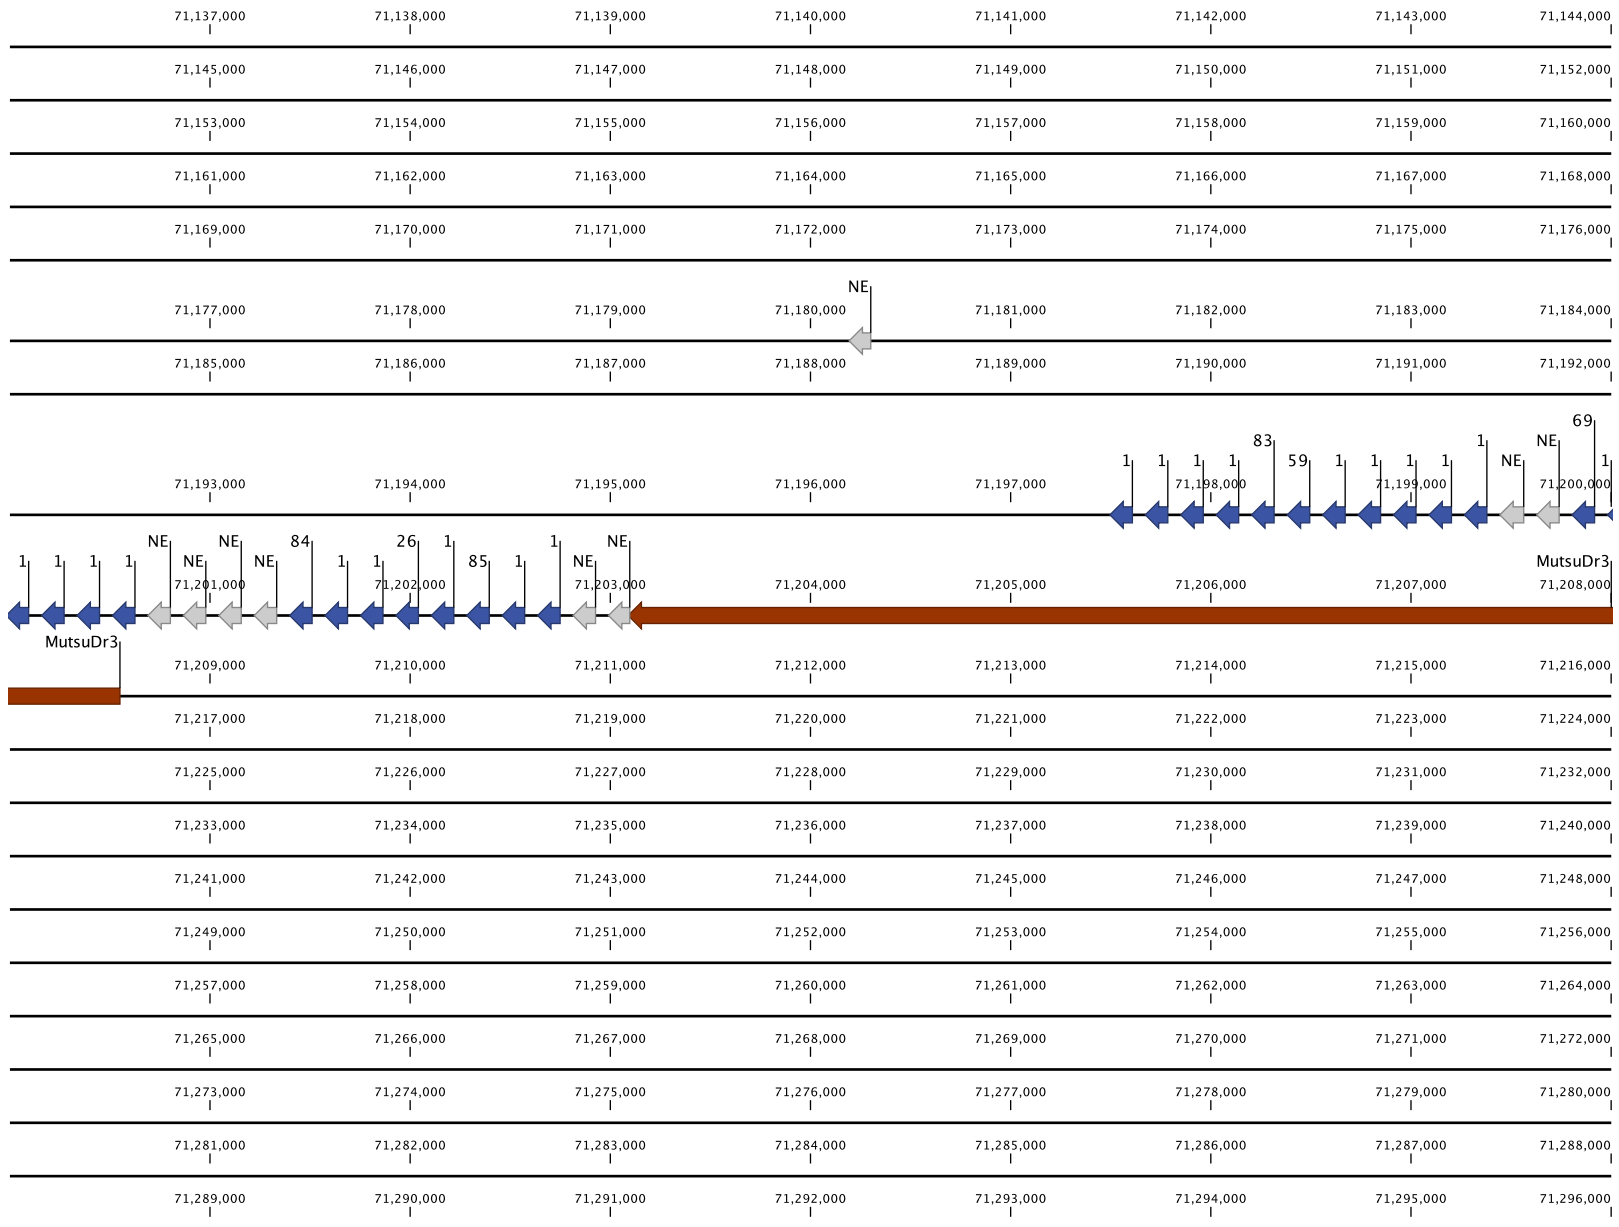

Supplement: supp_059642.116_Supplemental_Fig_S8.pdf [file supp_059642.116_Supplemental_Fig_S8.pdf]
