# Supplementary material for: Linking maternal and somatic 5S rRNA types with different sequence-specific non-LTR retrotransposons
Source: PubMed Central journal article supplement — RNA. 2017 Apr;23(4):446–56. doi: 10.1261/rna.059642.116 (PMC5340908; doi:10.1261/rna.059642.116), 2017-04
Supplement: supp_059642.116_Supplemental_Fig_S1.pdf [file supp_059642.116_Supplemental_Fig_S1.pdf]

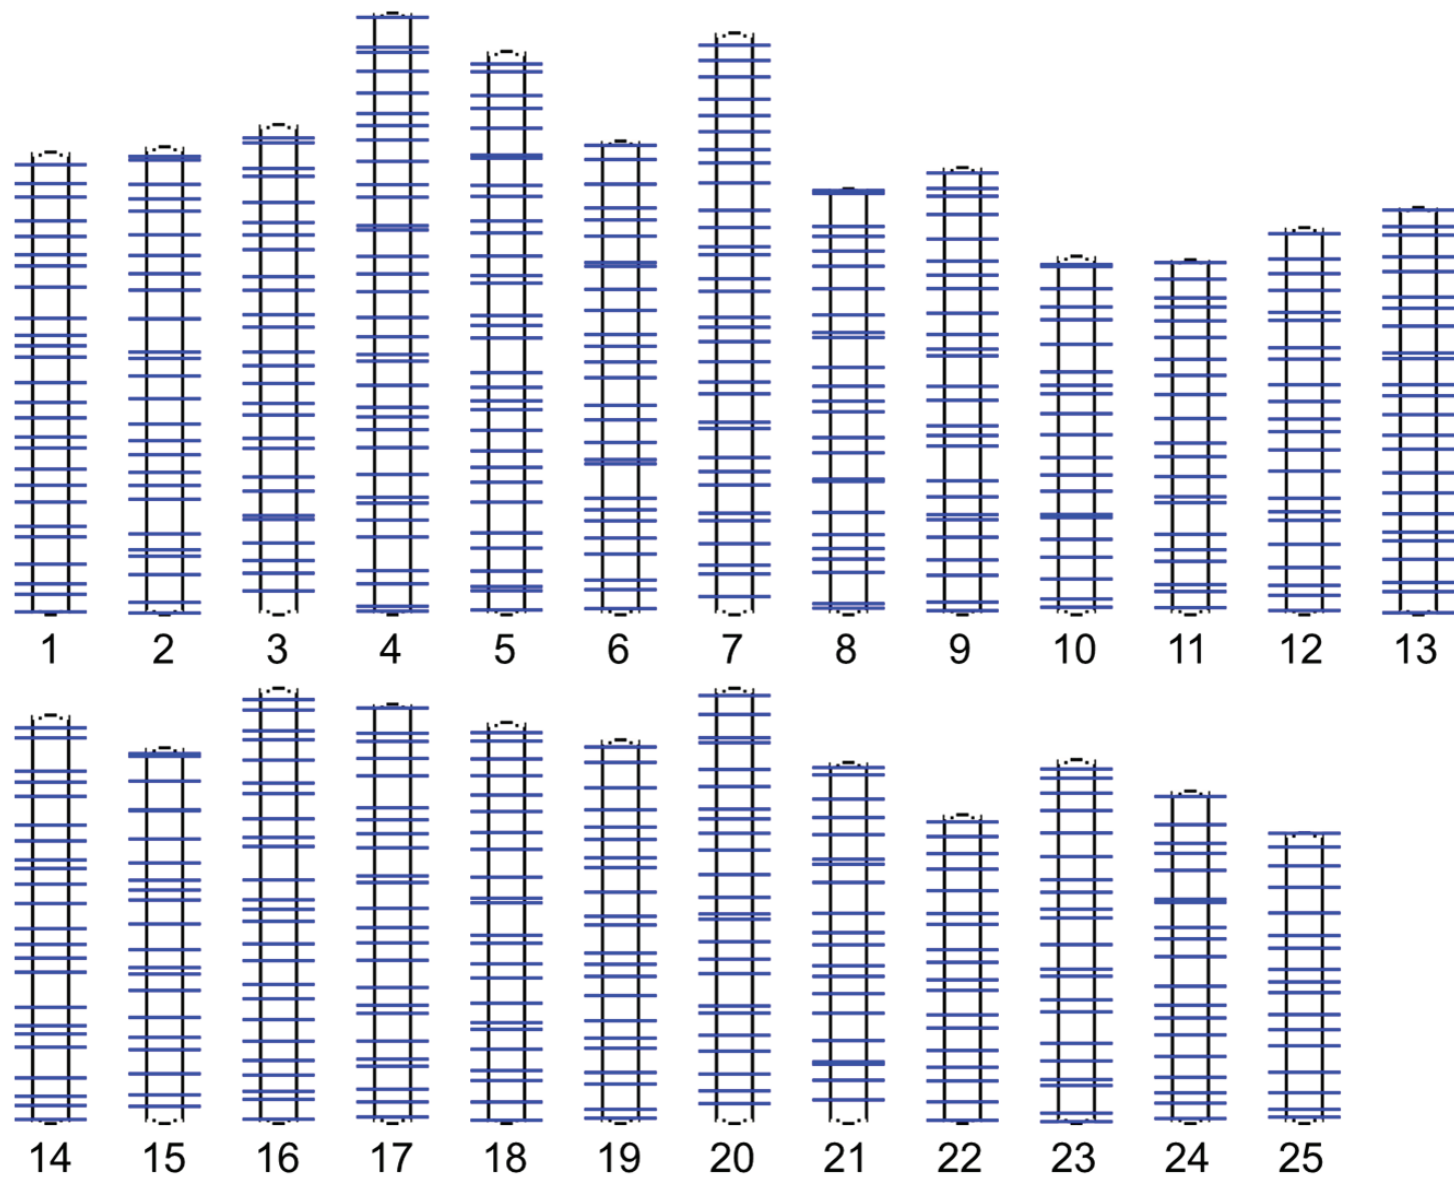

**Supplemental Figure S1. Genomic localization of putative 5S rRNA genes.**

Putative 5S rRNA genes are indicated on each chromosome of the zebrafish genome (blue lines). Due to the scale not all genes are visible and genes located on unplaced scaffolds are not shown.
