# Supplementary material for: Linking maternal and somatic 5S rRNA types with different sequence-specific non-LTR retrotransposons
Source: PubMed Central journal article supplement — RNA. 2017 Apr;23(4):446–56. doi: 10.1261/rna.059642.116 (PMC5340908; doi:10.1261/rna.059642.116), 2017-04
Supplement: supp_059642.116_Supplemental_Fig_S2.pdf [file supp_059642.116_Supplemental_Fig_S2.pdf]

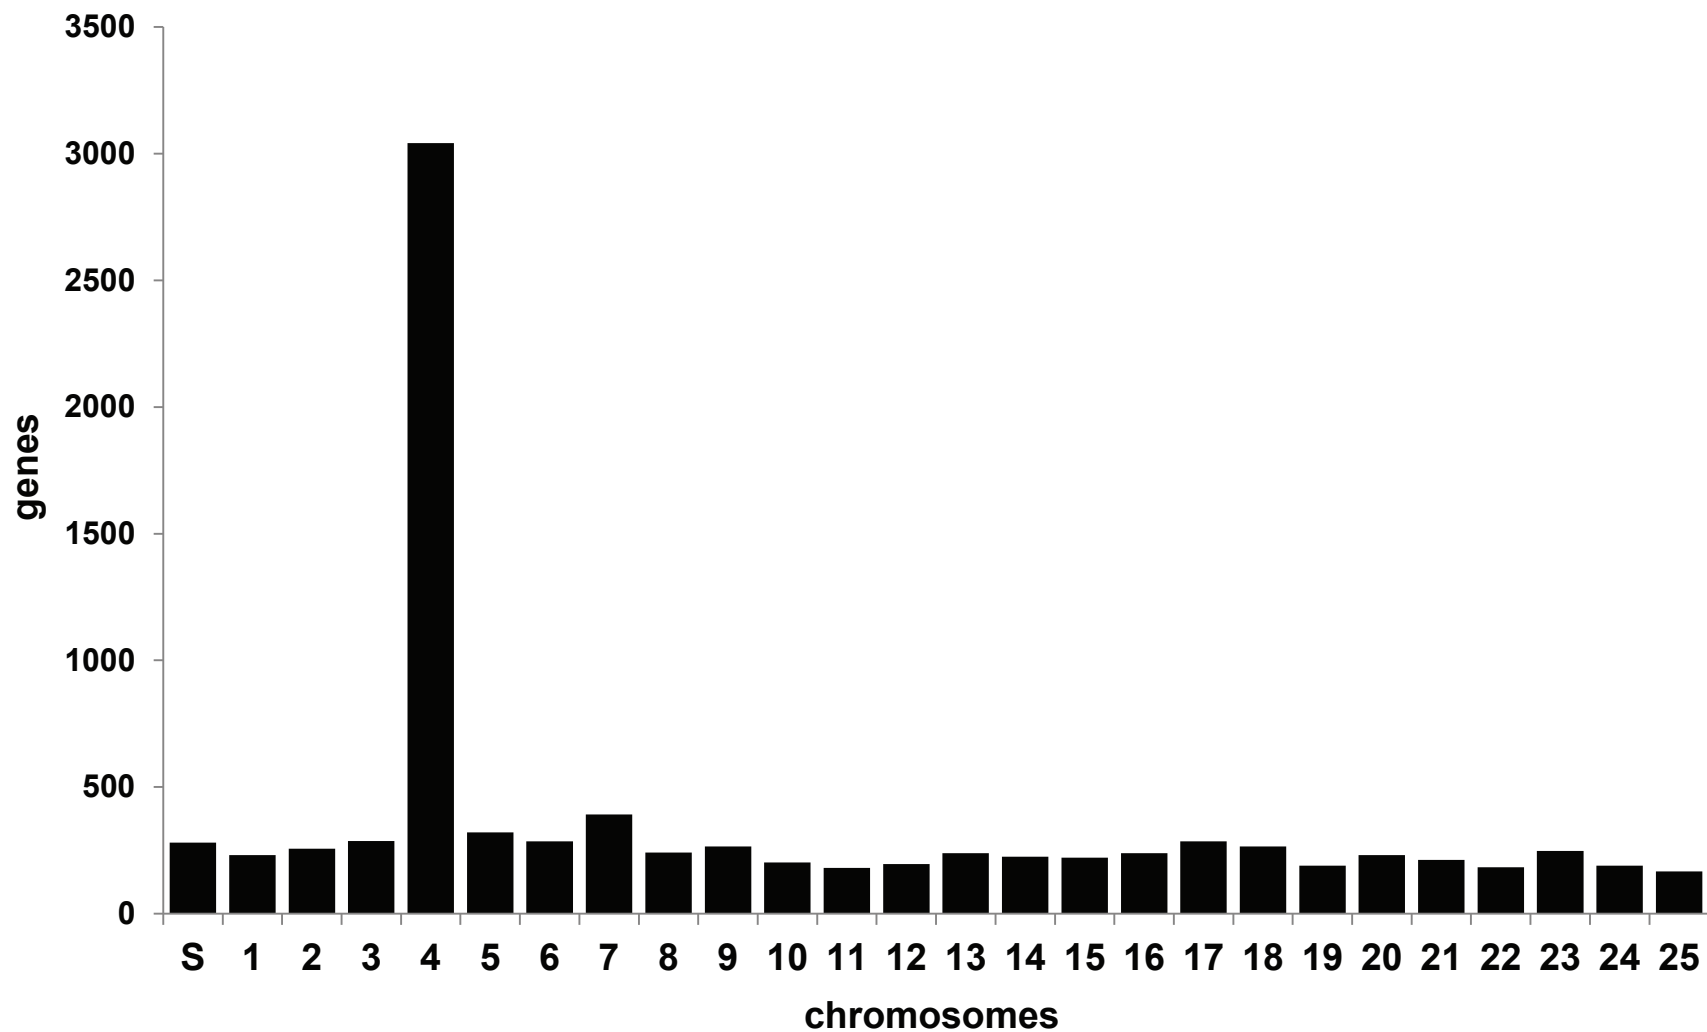

**Supplemental Figure S2. Genomic distribution of putative 5S rRNA genes.**  
The unplaced genomic scaffolds are collectively indicated as “S”.
