# Supplementary material for: Linking maternal and somatic 5S rRNA types with different sequence-specific non-LTR retrotransposons
Source: PubMed Central journal article supplement — RNA. 2017 Apr;23(4):446–56. doi: 10.1261/rna.059642.116 (PMC5340908; doi:10.1261/rna.059642.116), 2017-04
Supplement: supp_059642.116_Supplemental_Fig_S4.pdf [file supp_059642.116_Supplemental_Fig_S4.pdf]

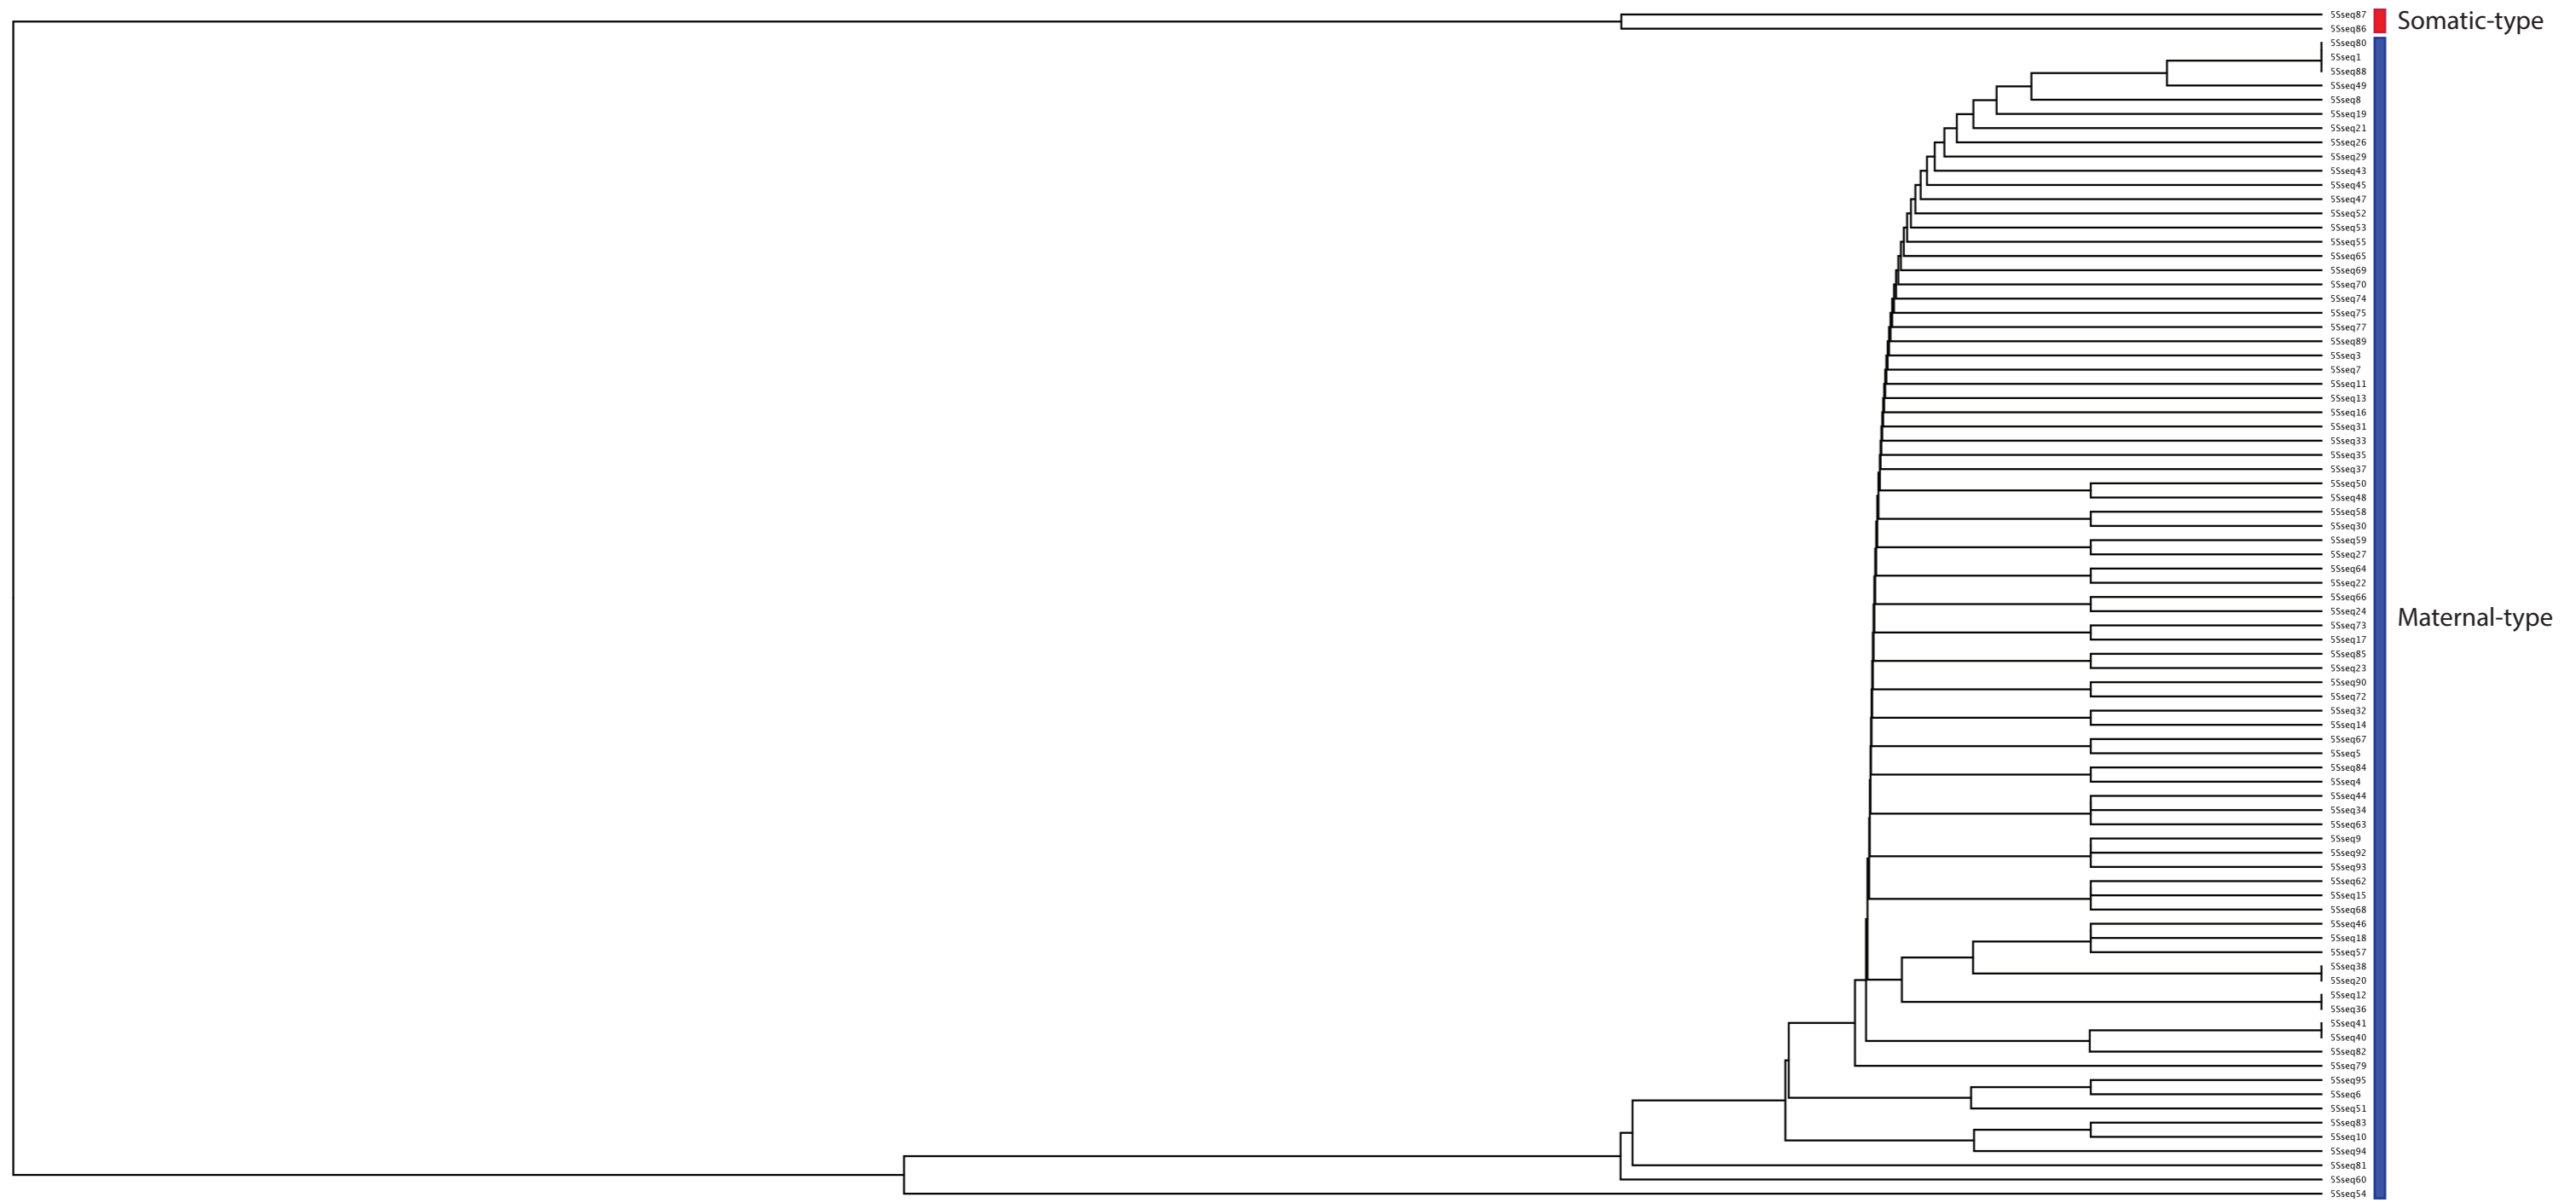

**Supplemental Figure S4. Comparing the expressed 5S rRNA variant genes.**

Tree showing the relation between the expressed 5S rRNA variants. The colored bars on the right highlight the two clusters with the maternal and somatic 5S rRNA types.
