# Supplementary material for: Linking maternal and somatic 5S rRNA types with different sequence-specific non-LTR retrotransposons
Source: PubMed Central journal article supplement — RNA. 2017 Apr;23(4):446–56. doi: 10.1261/rna.059642.116 (PMC5340908; doi:10.1261/rna.059642.116), 2017-04
Supplement: supp_059642.116_Supplemental_Fig_S5.pdf [file supp_059642.116_Supplemental_Fig_S5.pdf]

**A****Egg**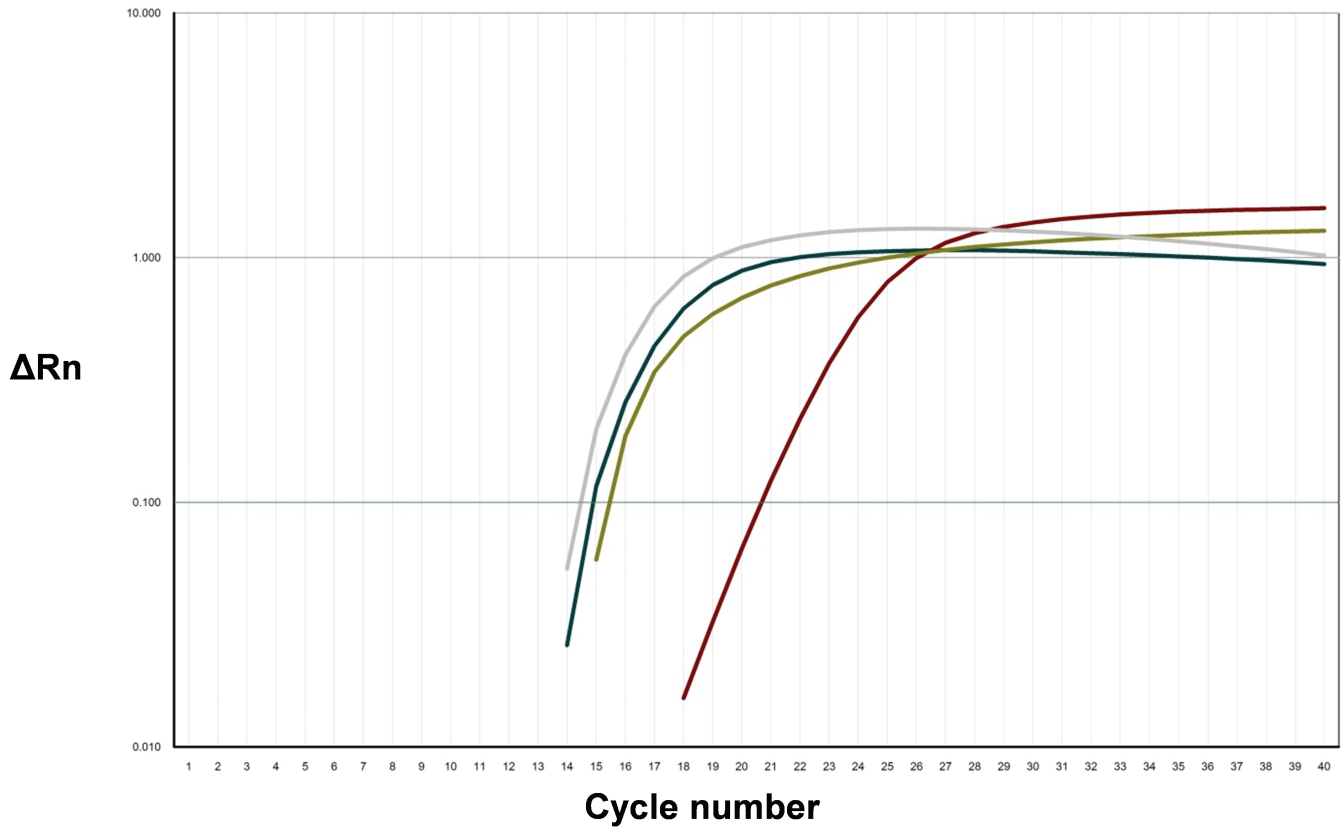**B****Whole-body male-adult**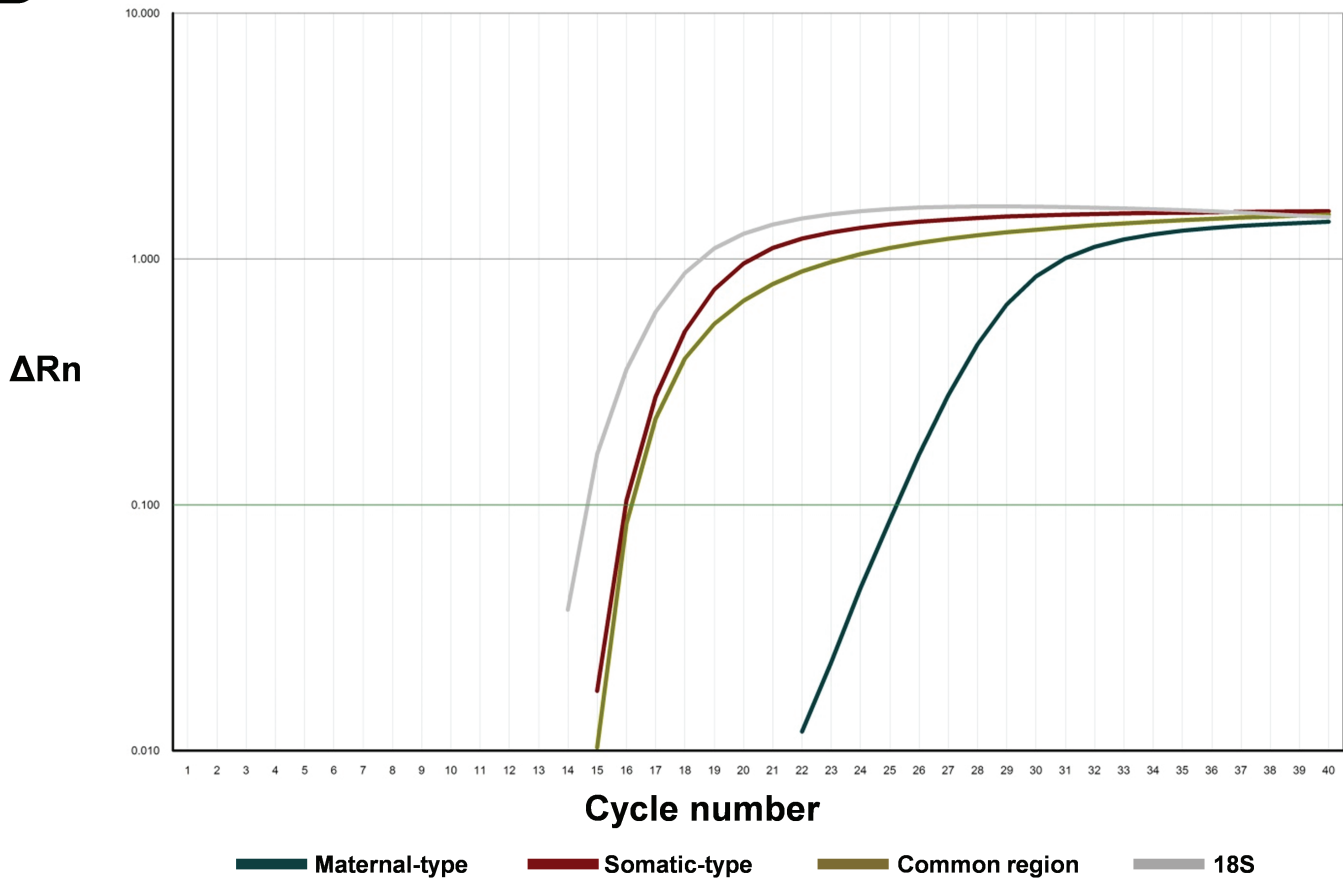

— Maternal-type

— Somatic-type

— Common region

— 18S

**Supplemental Figure S5: Confirming specific expression of 5S rRNA types by quantitative real-time PCR.**

A: Quantitative real-time PCR on cDNA from egg RNA using the indicated specific PCR primer sets.

B: Quantitative real-time PCR on cDNA from whole-body male-adult RNA using the indicated specific PCR primer sets.

The  $\Delta Rn$  value is the  $Rn$  (normalized reporter) value of the reaction minus the  $Rn$  value of the baseline signal generated by the instrument.
