# Supplementary material for: Linking maternal and somatic 5S rRNA types with different sequence-specific non-LTR retrotransposons
Source: PubMed Central journal article supplement — RNA. 2017 Apr;23(4):446–56. doi: 10.1261/rna.059642.116 (PMC5340908; doi:10.1261/rna.059642.116), 2017-04
Supplement: supp_059642.116_Supplemental_Fig_S7.pdf [file supp_059642.116_Supplemental_Fig_S7.pdf]

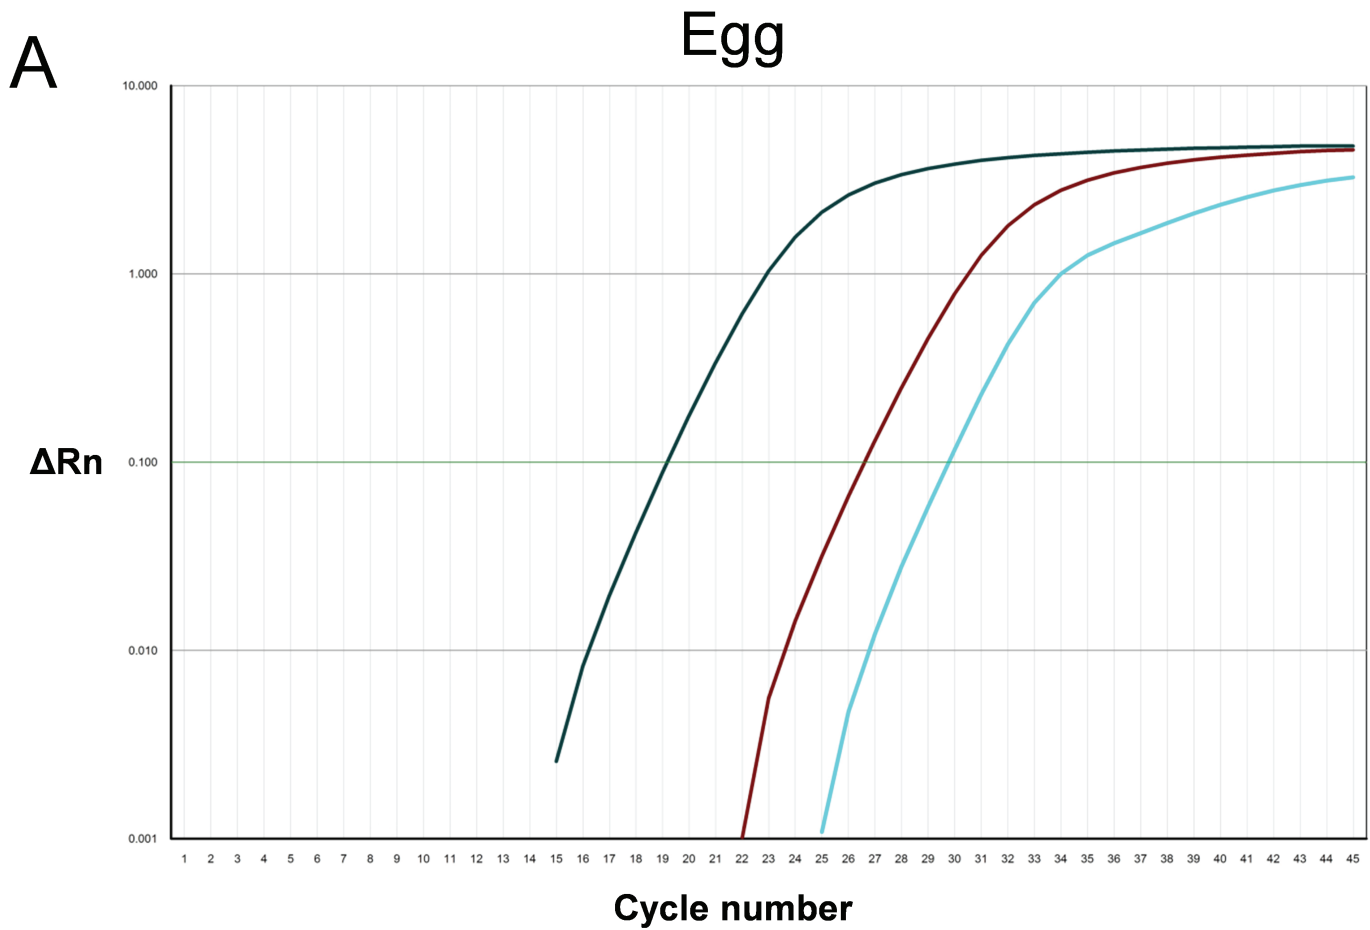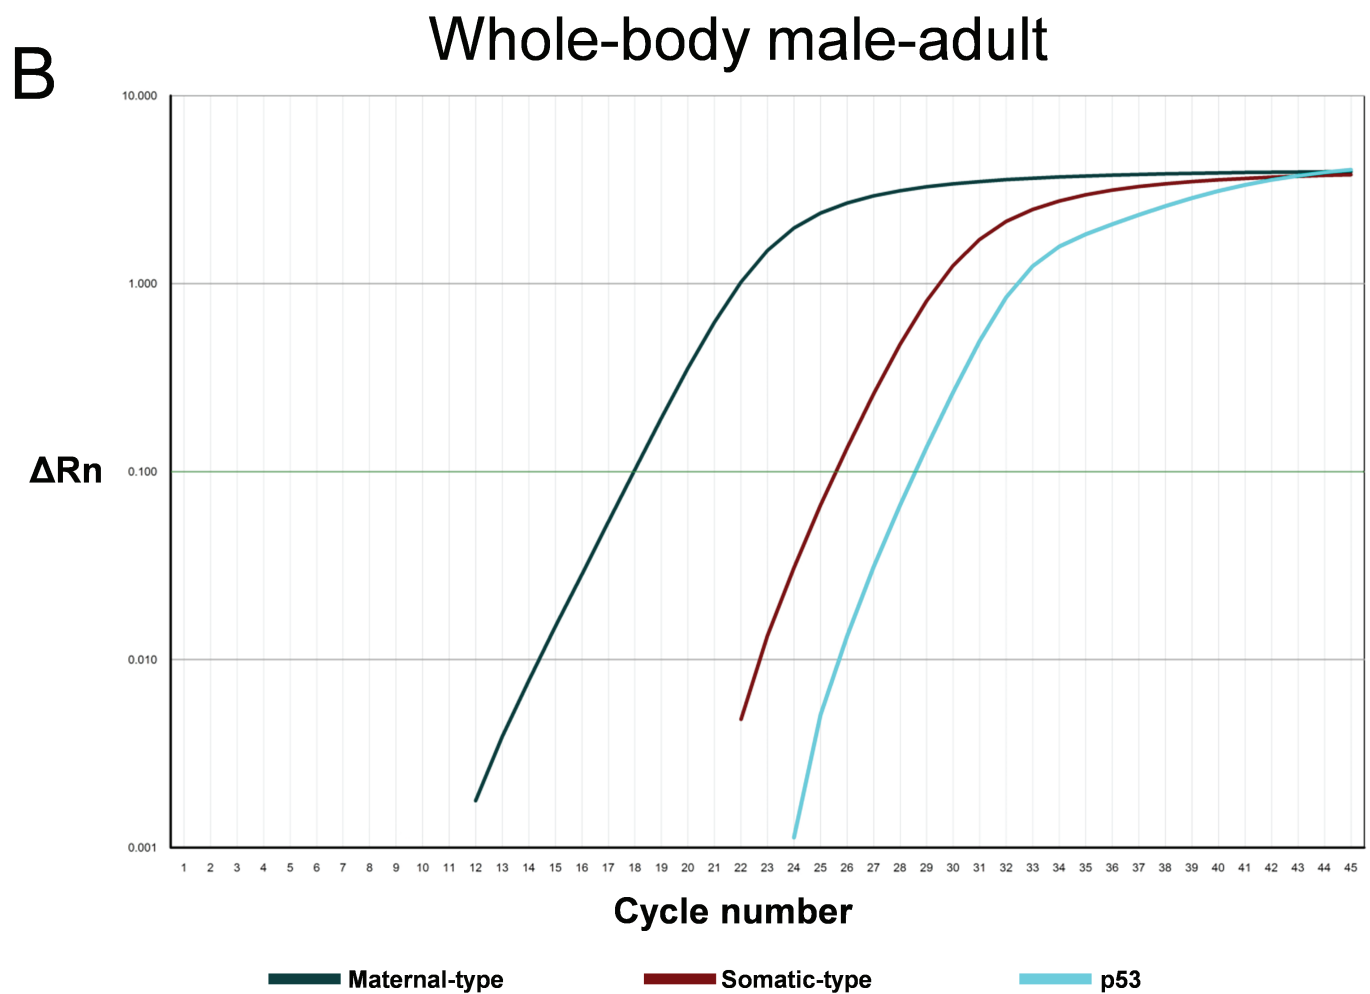

**Supplemental Figure S7: Confirming rDNA copy number of 5S types by quantitative real-time PCR.**  
 A: Quantitative real-time PCR on egg DNA using the indicated specific PCR primer sets.  
 B: Quantitative real-time PCR on whole-body male-adult DNA using the indicated specific PCR primer sets.  
 The  $\Delta R_n$  value is the  $R_n$  (normalized reporter) value of the reaction minus the  $R_n$  value of the baseline signal generated by the instrument.
