# Supplementary material for: Linking maternal and somatic 5S rRNA types with different sequence-specific non-LTR retrotransposons
Source: PubMed Central journal article supplement — RNA. 2017 Apr;23(4):446–56. doi: 10.1261/rna.059642.116 (PMC5340908; doi:10.1261/rna.059642.116), 2017-04
Supplement: supp_059642.116_Supplemental_Fig_S9.pdf [file supp_059642.116_Supplemental_Fig_S9.pdf]

Supplemental Figure S9

|          |                                                                                                                   |     |     |     |     |     |     |
|----------|-------------------------------------------------------------------------------------------------------------------|-----|-----|-----|-----|-----|-----|
|          |                                                                                                                   | 20  | 40  | 60  | 80  | 100 |     |
| MutsuDr1 | CAGGTGCTGTAAGCTTTTCAAAGTCCTTCATTTGGCAGCTGATAGACTTCCCCGTGTACAGCTTCGCTGCCATTATTTTTCTCGCCTTCAAGGGCATTGTTTCTGTCGAT    |     |     |     |     |     | 111 |
| 1.1      | -----                                                                                                             |     |     |     |     |     | -   |
| 1.2      | -----                                                                                                             |     |     |     |     |     | 96  |
| 1.3      | -----                                                                                                             |     |     |     |     |     | -   |
| 1.4      | -----                                                                                                             |     |     |     |     |     | -   |
| 1.5      | -----                                                                                                             |     |     |     |     |     | -   |
| 1.6      | -----                                                                                                             |     |     |     |     |     | -   |
| 1.7      | -----                                                                                                             |     |     |     |     |     | -   |
| 1.8      | -----                                                                                                             |     |     |     |     |     | -   |
| 1.9      | -----                                                                                                             |     |     |     |     |     | -   |
| 1.10     | -----                                                                                                             |     |     |     |     |     | -   |
| 1.11     | -----                                                                                                             |     |     |     |     |     | -   |
|          |                                                                                                                   | 120 | 140 | 160 | 180 | 200 | 220 |
| MutsuDr1 | GCTGTGTCGATGCCAGCTGAGCTGCGTCCTTCCCTGGTGCTGCGCCTGTTTTAAATAGCCAACCTCTTGACAGCCTCTTTTCGCTTACGGCCACACCACCCTGTGCATGTGTG |     |     |     |     |     | 222 |
| 1.1      | -----                                                                                                             |     |     |     |     |     | -   |
| 1.2      | -----                                                                                                             |     |     |     |     |     | 207 |
| 1.3      | -----                                                                                                             |     |     |     |     |     | -   |
| 1.4      | -----                                                                                                             |     |     |     |     |     | 12  |
| 1.5      | -----                                                                                                             |     |     |     |     |     | 12  |
| 1.6      | -----                                                                                                             |     |     |     |     |     | 12  |
| 1.7      | -----                                                                                                             |     |     |     |     |     | 12  |
| 1.8      | -----                                                                                                             |     |     |     |     |     | 12  |
| 1.9      | -----                                                                                                             |     |     |     |     |     | 12  |
| 1.10     | -----                                                                                                             |     |     |     |     |     | 12  |
| 1.11     | -----                                                                                                             |     |     |     |     |     | 12  |
|          |                                                                                                                   | 240 | 260 | 280 | 300 | 320 |     |
| MutsuDr1 | ATAGTGGTACATTCAGGAAGTGTTGGCTGCAGTTGGTGAGAGAGGCTCACCAGATTTTCTTTGTTATTTTTGTTTTGTCTTAAATACATTTTGTAAACTTTTTTT         |     |     |     |     |     | 333 |
| 1.1      | -----                                                                                                             |     |     |     |     |     | -   |
| 1.2      | -----                                                                                                             |     |     |     |     |     | 318 |
| 1.3      | -----                                                                                                             |     |     |     |     |     | -   |
| 1.4      | -----                                                                                                             |     |     |     |     |     | 123 |
| 1.5      | -----                                                                                                             |     |     |     |     |     | 123 |
| 1.6      | -----                                                                                                             |     |     |     |     |     | 123 |
| 1.7      | -----                                                                                                             |     |     |     |     |     | 123 |
| 1.8      | -----                                                                                                             |     |     |     |     |     | 123 |
| 1.9      | -----                                                                                                             |     |     |     |     |     | 123 |
| 1.10     | -----                                                                                                             |     |     |     |     |     | 123 |
| 1.11     | -----                                                                                                             |     |     |     |     |     | 118 |
|          |                                                                                                                   | 340 | 360 | 380 | 400 | 420 | 440 |
| MutsuDr1 | T-GTTTGTTTAGTTTGTCC-TCCCAGCAGCGTGAGCTGTTCCGGAGGAGTGTTTTTATTTATTTATTTTTTTTTGCAATGGACGGATCTACGGTGACAGACCTGGCAATG    |     |     |     |     |     | 442 |
| 1.1      | -----                                                                                                             |     |     |     |     |     | 104 |
| 1.2      | -----                                                                                                             |     |     |     |     |     | 427 |
| 1.3      | -----                                                                                                             |     |     |     |     |     | -   |
| 1.4      | -----                                                                                                             |     |     |     |     |     | 230 |
| 1.5      | -----                                                                                                             |     |     |     |     |     | 228 |
| 1.6      | -----                                                                                                             |     |     |     |     |     | 234 |
| 1.7      | -----                                                                                                             |     |     |     |     |     | 228 |
| 1.8      | -----                                                                                                             |     |     |     |     |     | 230 |
| 1.9      | -----                                                                                                             |     |     |     |     |     | 230 |
| 1.10     | -----                                                                                                             |     |     |     |     |     | 228 |
| 1.11     | -----                                                                                                             |     |     |     |     |     | 224 |

Supplemental Figure S9

|          |                                                                                                                        |     |  |     |  |     |  |     |  |     |  |     |
|----------|------------------------------------------------------------------------------------------------------------------------|-----|--|-----|--|-----|--|-----|--|-----|--|-----|
|          |                                                                                                                        | 460 |  | 480 |  | 500 |  | 520 |  | 540 |  |     |
| MutsuDr1 | <b>GCGGACGGAGTTGAGAAGGCAAATGACAATGGACTGGACAGACGACAACAAGAAACAAACCAATCGGAGAAGGAAGCAAGGAAAAGGATTTATCTAAAAGAAGCAACTGTA</b> |     |  |     |  |     |  |     |  |     |  | 553 |
| 1.1      | .....A.....G.....                                                                                                      |     |  |     |  |     |  |     |  |     |  | 215 |
| 1.2      | .....                                                                                                                  |     |  |     |  |     |  |     |  |     |  | 538 |
| 1.3      | -----                                                                                                                  |     |  |     |  |     |  |     |  |     |  | -   |
| 1.4      | .....G.....                                                                                                            |     |  |     |  |     |  |     |  |     |  | 341 |
| 1.5      | .....G.....                                                                                                            |     |  |     |  |     |  |     |  |     |  | 339 |
| 1.6      | .....G.C.....                                                                                                          |     |  |     |  |     |  |     |  |     |  | 345 |
| 1.7      | .....G.....                                                                                                            |     |  |     |  |     |  |     |  |     |  | 339 |
| 1.8      | .....G.....                                                                                                            |     |  |     |  |     |  |     |  |     |  | 341 |
| 1.9      | .....G.....                                                                                                            |     |  |     |  |     |  |     |  |     |  | 341 |
| 1.10     | .....G.....                                                                                                            |     |  |     |  |     |  |     |  |     |  | 339 |
| 1.11     | .....G.....                                                                                                            |     |  |     |  |     |  |     |  |     |  | 335 |
|          |                                                                                                                        | 560 |  | 580 |  | 600 |  | 620 |  | 640 |  | 660 |
| MutsuDr1 | <b>ACAGTGGACATAGGACAAGCAACAGAGGTGAGAGCAATAGATGTAATTAAGCAGAGACGGAGAGGATTGGGGATGGAAAGATTTTGGCCGTAAGACCAAAACACAACAAG</b>  |     |  |     |  |     |  |     |  |     |  | 664 |
| 1.1      | .....G.....T.....T.....                                                                                                |     |  |     |  |     |  |     |  |     |  | 326 |
| 1.2      | .....                                                                                                                  |     |  |     |  |     |  |     |  |     |  | 649 |
| 1.3      | -----                                                                                                                  |     |  |     |  |     |  |     |  |     |  | -   |
| 1.4      | .....G.....T.....T.....                                                                                                |     |  |     |  |     |  |     |  |     |  | 452 |
| 1.5      | .....TT.....G.....T.....T.....                                                                                         |     |  |     |  |     |  |     |  |     |  | 450 |
| 1.6      | .....A.....TT.....G.....T.....T.....                                                                                   |     |  |     |  |     |  |     |  |     |  | 456 |
| 1.7      | .....G.....T.....T.....                                                                                                |     |  |     |  |     |  |     |  |     |  | 450 |
| 1.8      | .....G.....T.....T.....                                                                                                |     |  |     |  |     |  |     |  |     |  | 452 |
| 1.9      | .....G.....T.....T.....                                                                                                |     |  |     |  |     |  |     |  |     |  | 452 |
| 1.10     | .....TT.....G.....T.....T.....                                                                                         |     |  |     |  |     |  |     |  |     |  | 450 |
| 1.11     | .....G.....T.....T.....                                                                                                |     |  |     |  |     |  |     |  |     |  | 446 |
|          |                                                                                                                        | 680 |  | 700 |  | 720 |  | 740 |  | 760 |  |     |
| MutsuDr1 | <b>GAATATGAAGTAACACTTGAAAGAGAGGAAGATGCTGATGAGTTAATGGACGAATTGACTATTAAGGGATAAACTGTGCAGTTAAGAGGCTACAAAACCGTGATTATGTT</b>  |     |  |     |  |     |  |     |  |     |  | 775 |
| 1.1      | .....C.....                                                                                                            |     |  |     |  |     |  |     |  |     |  | 437 |
| 1.2      | .....                                                                                                                  |     |  |     |  |     |  |     |  |     |  | 760 |
| 1.3      | .....C.....T.....C.....T.....                                                                                          |     |  |     |  |     |  |     |  |     |  | 85  |
| 1.4      | .....C.....                                                                                                            |     |  |     |  |     |  |     |  |     |  | 563 |
| 1.5      | .....C.....                                                                                                            |     |  |     |  |     |  |     |  |     |  | 561 |
| 1.6      | .....C.....                                                                                                            |     |  |     |  |     |  |     |  |     |  | 567 |
| 1.7      | .....C.....                                                                                                            |     |  |     |  |     |  |     |  |     |  | 561 |
| 1.8      | .....C.....                                                                                                            |     |  |     |  |     |  |     |  |     |  | 563 |
| 1.9      | .....C.....                                                                                                            |     |  |     |  |     |  |     |  |     |  | 563 |
| 1.10     | .....C.....                                                                                                            |     |  |     |  |     |  |     |  |     |  | 561 |
| 1.11     | .....A.....C.....                                                                                                      |     |  |     |  |     |  |     |  |     |  | 557 |
|          |                                                                                                                        | 780 |  | 800 |  | 820 |  | 840 |  | 860 |  | 880 |
| MutsuDr1 | <b>GTCTCCTTCATGCATCTGCCTGTCTATGTTGCTGATAAAGATATTTTAGACAAATTGGATCATTGGGGAGTTTTGCCATTTCAAAATTAAAAGAAGGTTTTATCCGGGC</b>   |     |  |     |  |     |  |     |  |     |  | 886 |
| 1.1      | .....                                                                                                                  |     |  |     |  |     |  |     |  |     |  | 548 |
| 1.2      | .....                                                                                                                  |     |  |     |  |     |  |     |  |     |  | 871 |
| 1.3      | .....A.....A.....                                                                                                      |     |  |     |  |     |  |     |  |     |  | 196 |
| 1.4      | .....T.....                                                                                                            |     |  |     |  |     |  |     |  |     |  | 674 |
| 1.5      | .....                                                                                                                  |     |  |     |  |     |  |     |  |     |  | 672 |
| 1.6      | .....T.....                                                                                                            |     |  |     |  |     |  |     |  |     |  | 678 |
| 1.7      | .....                                                                                                                  |     |  |     |  |     |  |     |  |     |  | 672 |
| 1.8      | .....T.....                                                                                                            |     |  |     |  |     |  |     |  |     |  | 674 |
| 1.9      | .....T.....                                                                                                            |     |  |     |  |     |  |     |  |     |  | 674 |
| 1.10     | .....                                                                                                                  |     |  |     |  |     |  |     |  |     |  | 672 |
| 1.11     | .....                                                                                                                  |     |  |     |  |     |  |     |  |     |  | 668 |

Supplemental Figure S9

|          |                                                                                                                 |                                                                |   |       |       |       |       |       |   |       |       |       |      |
|----------|-----------------------------------------------------------------------------------------------------------------|----------------------------------------------------------------|---|-------|-------|-------|-------|-------|---|-------|-------|-------|------|
|          |                                                                                                                 | 900                                                            |   | 920   |       | 940   |       | 960   |   | 980   |       |       |      |
| MutsuDr1 | ACAAATATTGAAGATGGGACGAGGTTTGTGAAAACCAGATTCCCCAAAGA                                                              | ACTGGCGTCCCTCCCGTACAGCACAAAGAATAGAGACAGCAGAGGGTCCACAATACTTTAGG |   |       |       |       |       |       |   |       |       | 997   |      |
| 1.1      | .....                                                                                                           |                                                                |   |       |       | G     | ..... |       |   | A     | ..... | 659   |      |
| 1.2      | .....                                                                                                           |                                                                |   |       |       |       | ..... |       |   |       | ..... | 982   |      |
| 1.3      | .....                                                                                                           |                                                                |   |       |       | G     | ..... |       | T | A     | ..... | 307   |      |
| 1.4      | .....                                                                                                           |                                                                |   |       |       | G     | ..... |       |   | A     | ..... | 785   |      |
| 1.5      | .....                                                                                                           |                                                                |   |       |       | G     | ..... |       |   | A     | ..... | 783   |      |
| 1.6      | .....                                                                                                           |                                                                |   |       |       | G     | ..... |       |   | A     | ..... | 789   |      |
| 1.7      | .....                                                                                                           |                                                                |   |       |       | G     | C     | ..... |   | A     | ..... | 783   |      |
| 1.8      | .....                                                                                                           |                                                                |   |       |       | G     | ..... |       |   | A     | ..... | 785   |      |
| 1.9      | .....                                                                                                           |                                                                |   |       |       | G     | ..... |       |   | A     | ..... | 785   |      |
| 1.10     | .....                                                                                                           |                                                                |   |       |       | G     | ..... |       |   | A     | ..... | 783   |      |
| 1.11     | .....                                                                                                           |                                                                |   |       |       | G     | ..... |       |   | A     | ..... | 779   |      |
|          |                                                                                                                 | 1,000                                                          |   | 1,020 |       | 1,040 |       | 1,060 |   | 1,080 |       | 1,100 |      |
| MutsuDr1 | GTGATGCACAGTCATCAGGTGAAAACATGCAGGCTGTGCTTGAGCCCAGATCATGTGGTAAAAGACTGTCCTGATTTTAGGTGCTATAAGTGCGAGGAAAGGGGGCACTTT |                                                                |   |       |       |       |       |       |   |       |       | 1108  |      |
| 1.1      | .....                                                                                                           |                                                                |   | G     | ..... | A     | ..... |       |   | G     | ..... | 770   |      |
| 1.2      | .....                                                                                                           |                                                                | T |       | ..... |       | ..... |       |   |       | ..... | 1093  |      |
| 1.3      | .....                                                                                                           |                                                                | T |       | G     | ..... | A     | ..... |   |       | ..... | 418   |      |
| 1.4      | .....                                                                                                           |                                                                |   |       | G     | ..... | A     | ..... |   |       | ..... | 896   |      |
| 1.5      | .....                                                                                                           |                                                                |   |       | G     | ..... | A     | ..... |   |       | ..... | 894   |      |
| 1.6      | .....                                                                                                           |                                                                |   |       | G     | ..... | A     | ..... |   |       | ..... | 900   |      |
| 1.7      | .....                                                                                                           |                                                                |   |       | G     | ..... | A     | ..... |   |       | ..... | 894   |      |
| 1.8      | .....                                                                                                           |                                                                |   |       | G     | ..... | A     | ..... |   |       | ..... | 896   |      |
| 1.9      | .....                                                                                                           |                                                                |   |       | G     | ..... | A     | ..... |   |       | ..... | 896   |      |
| 1.10     | .....                                                                                                           |                                                                |   |       | G     | ..... | A     | ..... |   |       | ..... | 894   |      |
| 1.11     | .....                                                                                                           |                                                                |   |       | G     | ..... | A     | ..... |   |       | ..... | 890   |      |
|          |                                                                                                                 | 1,120                                                          |   | 1,140 |       | 1,160 |       | 1,180 |   | 1,200 |       | 1,220 |      |
| MutsuDr1 | GCAAAGTTTTGCACTGCTGTAAGGTGCCCGATTGTAATAAGGTTTTGAATAAATGTGAATGTTGGATTGGGGAAGAGGAGGAGGAGGTAGAGCAGCAGGTGGGCAGGCAG  |                                                                |   |       |       |       |       |       |   |       |       | 1219  |      |
| 1.1      | .....                                                                                                           |                                                                |   | G     | ..... | A     | ..... |       |   | G     | ..... | A     | 881  |
| 1.2      | .....                                                                                                           |                                                                |   |       | ..... |       | ..... |       |   |       | ..... | 1204  |      |
| 1.3      | .....                                                                                                           |                                                                |   |       |       | A     | ..... |       |   |       | ..... | 529   |      |
| 1.4      | .....                                                                                                           |                                                                |   | G     | ..... | A     | ..... |       |   | G     | ..... | A     | 1007 |
| 1.5      | .....                                                                                                           |                                                                |   | G     | ..... | A     | ..... |       |   | G     | ..... | A     | 1005 |
| 1.6      | .....                                                                                                           |                                                                |   | G     | ..... | A     | ..... |       |   | G     | ..... | A     | 1011 |
| 1.7      | .....                                                                                                           |                                                                |   | G     | ..... | A     | ..... |       |   | G     | ..... | A     | 1005 |
| 1.8      | .....                                                                                                           |                                                                |   | G     | ..... | A     | ..... |       |   | G     | ..... | A     | 1007 |
| 1.9      | .....                                                                                                           |                                                                |   | G     | ..... | A     | ..... |       |   | G     | ..... | A     | 1007 |
| 1.10     | .....                                                                                                           |                                                                |   | G     | ..... | A     | ..... |       |   | G     | ..... | A     | 1005 |
| 1.11     | .....                                                                                                           |                                                                |   | G     | ..... | A     | ..... |       |   | G     | ..... | A     | 1001 |
|          |                                                                                                                 | 1,240                                                          |   | 1,260 |       | 1,280 |       | 1,300 |   | 1,320 |       |       |      |
| MutsuDr1 | ATGTATGAAGGAGACAATATCCAGTCGGAGGACAAAACAACAACAAGAAAAAAGTACAGAATCTGAAAGTGAAAACTACAAGAGAATGAGACTAATGGAATAGACAGA    |                                                                |   |       |       |       |       |       |   |       |       | 1330  |      |
| 1.1      | .....                                                                                                           |                                                                |   | A     | ..... |       |       |       |   | A     | ..... | 992   |      |
| 1.2      | .....                                                                                                           |                                                                |   |       | ..... |       | ..... |       |   |       | ..... | 1315  |      |
| 1.3      | .....                                                                                                           |                                                                |   | A     | ..... | A     | ..... |       |   |       | ..... | 640   |      |
| 1.4      | .....                                                                                                           |                                                                |   | A     | ..... | A     | ..... |       |   |       | ..... | 1118  |      |
| 1.5      | .....                                                                                                           |                                                                |   | A     | ..... | A     | A     | ..... |   |       | ..... | 1116  |      |
| 1.6      | .....                                                                                                           |                                                                |   | A     | ..... | A     | ..... |       |   |       | ..... | 1122  |      |
| 1.7      | .....                                                                                                           |                                                                |   | A     | ..... | A     | ..... |       |   |       | ..... | 1116  |      |
| 1.8      | .....                                                                                                           |                                                                |   | A     | ..... | A     | ..... |       |   |       | ..... | 1118  |      |
| 1.9      | .....                                                                                                           |                                                                |   | A     | ..... | A     | ..... |       |   |       | ..... | 1118  |      |
| 1.10     | .....                                                                                                           |                                                                |   | A     | ..... | A     | A     | ..... |   |       | ..... | 1116  |      |
| 1.11     | .....                                                                                                           |                                                                |   | A     | ..... | A     | ..... |       |   |       | C     | 1112  |      |

Supplemental Figure S9

|          |                                                                                                                        |       |  |       |  |       |  |       |  |       |  |       |                                                    |      |
|----------|------------------------------------------------------------------------------------------------------------------------|-------|--|-------|--|-------|--|-------|--|-------|--|-------|----------------------------------------------------|------|
|          |                                                                                                                        | 1,340 |  | 1,360 |  | 1,380 |  | 1,400 |  | 1,420 |  | 1,440 |                                                    |      |
| MutsuDr1 | <b>GTCACGGAACAGGAAGGGACAACATGGACACAAATGGATATGACTGACAGTTTTAAAGAGTTTTTGGAAGCAGCAGAATTGAGCGATTCGAATAATAAAGACTTGAATCAA</b> |       |  |       |  |       |  |       |  |       |  |       | 1441                                               |      |
| 1.1      | .....                                                                                                                  |       |  |       |  |       |  |       |  |       |  |       | A.....                                             | 1103 |
| 1.2      | .....                                                                                                                  |       |  |       |  |       |  |       |  |       |  |       | .....                                              | 1426 |
| 1.3      | ..... <b>T</b> .....                                                                                                   |       |  |       |  |       |  |       |  |       |  |       | ..... <b>A</b> .....                               | 751  |
| 1.4      | .....                                                                                                                  |       |  |       |  |       |  |       |  |       |  |       | ..... <b>A</b> .....                               | 1229 |
| 1.5      | .....                                                                                                                  |       |  |       |  |       |  |       |  |       |  |       | ..... <b>A</b> .....                               | 1227 |
| 1.6      | .....                                                                                                                  |       |  |       |  |       |  |       |  |       |  |       | ..... <b>A</b> .....                               | 1233 |
| 1.7      | ..... <b>A</b> .....                                                                                                   |       |  |       |  |       |  |       |  |       |  |       | ..... <b>A</b> .....                               | 1227 |
| 1.8      | .....                                                                                                                  |       |  |       |  |       |  |       |  |       |  |       | ..... <b>A</b> .....                               | 1229 |
| 1.9      | .....                                                                                                                  |       |  |       |  |       |  |       |  |       |  |       | ..... <b>A</b> .....                               | 1229 |
| 1.10     | .....                                                                                                                  |       |  |       |  |       |  |       |  |       |  |       | ..... <b>A</b> .....                               | 1227 |
| 1.11     | .....                                                                                                                  |       |  |       |  |       |  |       |  |       |  |       | ..... <b>A</b> .....                               | 1223 |
|          |                                                                                                                        | 1,460 |  | 1,480 |  | 1,500 |  | 1,520 |  | 1,540 |  |       |                                                    |      |
| MutsuDr1 | <b>GGACAACAGGAAGACACATTTTGGACACAAATGGACATCACAGACAGTTTTCAAAGGCATTGGACACAGAGGAGACAAAAGGCCAAAGTAATGACGAGCAAGCCGATTTA</b>  |       |  |       |  |       |  |       |  |       |  |       | 1552                                               |      |
| 1.1      | .....                                                                                                                  |       |  |       |  |       |  |       |  |       |  |       | G..... <b>T</b> ..... <b>G</b> .....               | 1214 |
| 1.2      | .....                                                                                                                  |       |  |       |  |       |  |       |  |       |  |       | .....                                              | 1537 |
| 1.3      | ..... <b>A</b> .....                                                                                                   |       |  |       |  |       |  |       |  |       |  |       | .....                                              | 862  |
| 1.4      | .....                                                                                                                  |       |  |       |  |       |  |       |  |       |  |       | G..... <b>T</b> .....                              | 1340 |
| 1.5      | .....                                                                                                                  |       |  |       |  |       |  |       |  |       |  |       | G..... <b>T</b> .....                              | 1338 |
| 1.6      | .....                                                                                                                  |       |  |       |  |       |  |       |  |       |  |       | G..... <b>T</b> ..... <b>A</b> .....               | 1344 |
| 1.7      | .....                                                                                                                  |       |  |       |  |       |  |       |  |       |  |       | G..... <b>T</b> .....                              | 1338 |
| 1.8      | .....                                                                                                                  |       |  |       |  |       |  |       |  |       |  |       | G..... <b>T</b> .....                              | 1340 |
| 1.9      | .....                                                                                                                  |       |  |       |  |       |  |       |  |       |  |       | G..... <b>T</b> .....                              | 1340 |
| 1.10     | .....                                                                                                                  |       |  |       |  |       |  |       |  |       |  |       | G..... <b>T</b> .....                              | 1338 |
| 1.11     | .....                                                                                                                  |       |  |       |  |       |  |       |  |       |  |       | G..... <b>T</b> .....                              | 1334 |
|          |                                                                                                                        | 1,560 |  | 1,580 |  | 1,600 |  | 1,620 |  | 1,640 |  | 1,660 |                                                    |      |
| MutsuDr1 | <b>GAGGGACATTTACAAAAGGATGGAAACAAAGAGACACAGGGGAAATCAGCAAAAAGAAAGATCGTTAAAGATAAA-CCTAATTTAGAGACTGTAAGAAAAAACTGCTA</b>    |       |  |       |  |       |  |       |  |       |  |       | 1662                                               |      |
| 1.1      | .....                                                                                                                  |       |  |       |  |       |  |       |  |       |  |       | ..... <b>A</b> ..... <b>C</b> .....                | 1325 |
| 1.2      | .....                                                                                                                  |       |  |       |  |       |  |       |  |       |  |       | .....                                              | 1647 |
| 1.3      | .....                                                                                                                  |       |  |       |  |       |  |       |  |       |  |       | ..... <b>A</b> ..... <b>C</b> .....                | 973  |
| 1.4      | .....                                                                                                                  |       |  |       |  |       |  |       |  |       |  |       | ..... <b>A</b> ..... <b>C</b> .....                | 1451 |
| 1.5      | .....                                                                                                                  |       |  |       |  |       |  |       |  |       |  |       | G..... <b>A</b> ..... <b>C</b> .....               | 1449 |
| 1.6      | .....                                                                                                                  |       |  |       |  |       |  |       |  |       |  |       | ..... <b>A</b> ..... <b>C</b> .....                | 1455 |
| 1.7      | .....                                                                                                                  |       |  |       |  |       |  |       |  |       |  |       | ..... <b>A</b> ..... <b>C</b> .....                | 1449 |
| 1.8      | .....                                                                                                                  |       |  |       |  |       |  |       |  |       |  |       | ..... <b>A</b> ..... <b>C</b> .....                | 1451 |
| 1.9      | .....                                                                                                                  |       |  |       |  |       |  |       |  |       |  |       | ..... <b>A</b> ..... <b>C</b> .....                | 1451 |
| 1.10     | .....                                                                                                                  |       |  |       |  |       |  |       |  |       |  |       | G..... <b>A</b> ..... <b>C</b> .....               | 1449 |
| 1.11     | ..... <b>A</b> .....                                                                                                   |       |  |       |  |       |  |       |  |       |  |       | ..... <b>A</b> ..... <b>T</b> ..... <b>C</b> ..... | 1445 |
|          |                                                                                                                        | 1,680 |  | 1,700 |  | 1,720 |  | 1,740 |  | 1,760 |  |       |                                                    |      |
| MutsuDr1 | <b>AAAGATGAAGAAATGAATGCGCAAATAAGTATGAGTTGCTAAAGGGCTTGAAGACATGGACTGAGATGATGTTTTT-ATGAATGTTTTTATGTCTTTTATGAATGTTT</b>    |       |  |       |  |       |  |       |  |       |  |       | 1772                                               |      |
| 1.1      | .....                                                                                                                  |       |  |       |  |       |  |       |  |       |  |       | ..... <b>C</b> ..... <b>T</b> .....                | 1435 |
| 1.2      | .....                                                                                                                  |       |  |       |  |       |  |       |  |       |  |       | .....                                              | 1757 |
| 1.3      | ..... <b>A</b> .....                                                                                                   |       |  |       |  |       |  |       |  |       |  |       | ..... <b>C</b> ..... <b>A</b> ..... <b>T</b> ..... | 1083 |
| 1.4      | .....                                                                                                                  |       |  |       |  |       |  |       |  |       |  |       | ..... <b>C</b> .....                               | 1561 |
| 1.5      | .....                                                                                                                  |       |  |       |  |       |  |       |  |       |  |       | ..... <b>C</b> ..... <b>T</b> ..... <b>A</b> ..... | 1559 |
| 1.6      | .....                                                                                                                  |       |  |       |  |       |  |       |  |       |  |       | .....                                              | 1565 |
| 1.7      | .....                                                                                                                  |       |  |       |  |       |  |       |  |       |  |       | ..... <b>A</b> ..... <b>T</b> .....                | 1560 |
| 1.8      | .....                                                                                                                  |       |  |       |  |       |  |       |  |       |  |       | ..... <b>C</b> .....                               | 1561 |
| 1.9      | .....                                                                                                                  |       |  |       |  |       |  |       |  |       |  |       | ..... <b>C</b> .....                               | 1561 |
| 1.10     | .....                                                                                                                  |       |  |       |  |       |  |       |  |       |  |       | ..... <b>C</b> ..... <b>T</b> ..... <b>A</b> ..... | 1559 |
| 1.11     | .....                                                                                                                  |       |  |       |  |       |  |       |  |       |  |       | ..... <b>C</b> ..... <b>T</b> .....                | 1555 |

Supplemental Figure S9

|          |                                                                                                                |       |       |       |       |       |      |
|----------|----------------------------------------------------------------------------------------------------------------|-------|-------|-------|-------|-------|------|
|          | 1,780                                                                                                          | 1,800 | 1,820 | 1,840 | 1,860 | 1,880 |      |
| MutsuDr1 | TTATATTTTTATGGTTTTAGGAATTGTGTCTTTAATGCAAGAGGGCTTTAGACATCAGGAAATTTGAAAAAGTGAAAGAAATGTGTA AACGAGAAGATGTGATTTTAC  |       |       |       |       |       | 1883 |
| 1.1      | .....                                                                                                          |       |       |       |       |       | 1546 |
| 1.2      | .....                                                                                                          |       |       |       |       |       | 1868 |
| 1.3      | .....                                                                                                          |       |       |       |       |       | 1194 |
| 1.4      | .....                                                                                                          |       |       |       |       |       | 1672 |
| 1.5      | .G.....                                                                                                        |       |       |       |       |       | 1670 |
| 1.6      | .....                                                                                                          |       |       |       |       |       | 1676 |
| 1.7      | .....                                                                                                          |       |       |       |       |       | 1671 |
| 1.8      | .....                                                                                                          |       |       |       |       |       | 1672 |
| 1.9      | .....                                                                                                          |       |       |       |       |       | 1672 |
| 1.10     | .G.....                                                                                                        |       |       |       |       |       | 1670 |
| 1.11     | .....                                                                                                          |       |       |       |       |       | 1666 |
|          | 1,900                                                                                                          | 1,920 | 1,940 | 1,960 | 1,980 |       |      |
| MutsuDr1 | TTCAAGAGACAAACTGGAGGGAAGAATGCATGAAGGAAATAAGAAAAAGTGGAGTGGGGAAATGTTATACAATAATGGGGATGGGAGGCTAGGGAGAGGAGTTGCAATTT |       |       |       |       |       | 1994 |
| 1.1      | .A.....                                                                                                        |       |       |       |       |       | 1657 |
| 1.2      | .....                                                                                                          |       |       |       |       |       | 1979 |
| 1.3      | .A.....                                                                                                        |       |       |       |       |       | 1305 |
| 1.4      | .A.....                                                                                                        |       |       |       |       |       | 1783 |
| 1.5      | .....                                                                                                          |       |       |       |       |       | 1781 |
| 1.6      | .....                                                                                                          |       |       |       |       |       | 1787 |
| 1.7      | .....                                                                                                          |       |       |       |       |       | 1782 |
| 1.8      | .....                                                                                                          |       |       |       |       |       | 1783 |
| 1.9      | .....                                                                                                          |       |       |       |       |       | 1783 |
| 1.10     | .....                                                                                                          |       |       |       |       |       | 1781 |
| 1.11     | .....                                                                                                          |       |       |       |       |       | 1777 |
|          | 2,000                                                                                                          | 2,020 | 2,040 | 2,060 | 2,080 | 2,100 |      |
| MutsuDr1 | TATTAAGAAAACAGTGGGGTTTTATGTAAACAATCTATAATGACAAAGAGGGAAAGTGTATGATATGTGAAATGGAGTATGTAAGAAAAA- GTAATTATGGTGAAT    |       |       |       |       |       | 2104 |
| 1.1      | .C.....                                                                                                        |       |       |       |       |       | 1767 |
| 1.2      | .....                                                                                                          |       |       |       |       |       | 2090 |
| 1.3      | .....                                                                                                          |       |       |       |       |       | 1416 |
| 1.4      | .C.....                                                                                                        |       |       |       |       |       | 1893 |
| 1.5      | .....                                                                                                          |       |       |       |       |       | 1891 |
| 1.6      | .....                                                                                                          |       |       |       |       |       | 1897 |
| 1.7      | .....                                                                                                          |       |       |       |       |       | 1892 |
| 1.8      | .C.....                                                                                                        |       |       |       |       |       | 1893 |
| 1.9      | .C.....                                                                                                        |       |       |       |       |       | 1893 |
| 1.10     | .....                                                                                                          |       |       |       |       |       | 1891 |
| 1.11     | .....                                                                                                          |       |       |       |       |       | 1887 |
|          | 2,120                                                                                                          | 2,140 | 2,160 | 2,180 | 2,200 | 2,220 |      |
| MutsuDr1 | GTTACAGCCCAACAGAGGAGAACA AAAAGAAAGATTATAATGTACTTAGAGATTATTTAAAGAAACACGAAAGAGTTATTATCATGGGTGATTTTAACACTGTTTTT   |       |       |       |       |       | 2215 |
| 1.1      | .....                                                                                                          |       |       |       |       |       | 1878 |
| 1.2      | .....                                                                                                          |       |       |       |       |       | 2201 |
| 1.3      | .....                                                                                                          |       |       |       |       |       | 1527 |
| 1.4      | .....                                                                                                          |       |       |       |       |       | 2004 |
| 1.5      | .....                                                                                                          |       |       |       |       |       | 2002 |
| 1.6      | .....                                                                                                          |       |       |       |       |       | 2008 |
| 1.7      | .....                                                                                                          |       |       |       |       |       | 2003 |
| 1.8      | .....                                                                                                          |       |       |       |       |       | 2004 |
| 1.9      | .....                                                                                                          |       |       |       |       |       | 2004 |
| 1.10     | .....                                                                                                          |       |       |       |       |       | 2002 |
| 1.11     | .....                                                                                                          |       |       |       |       |       | 1998 |

Supplemental Figure S9

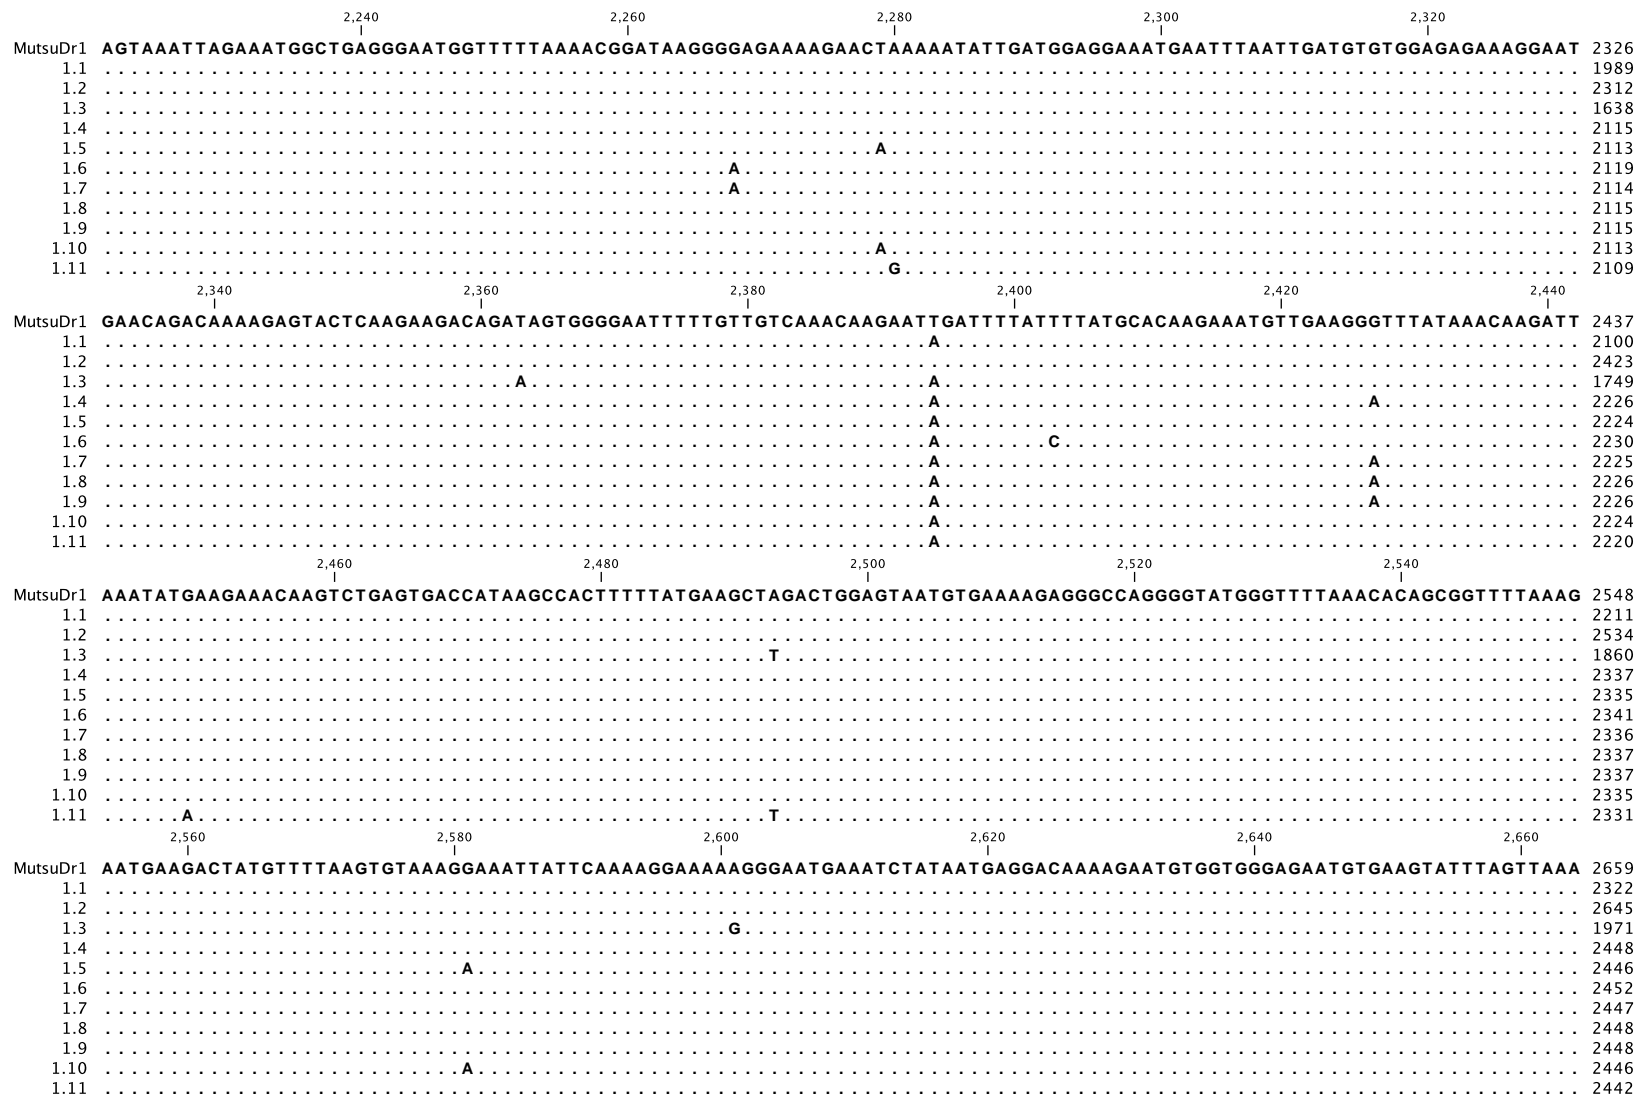

Supplemental Figure S9

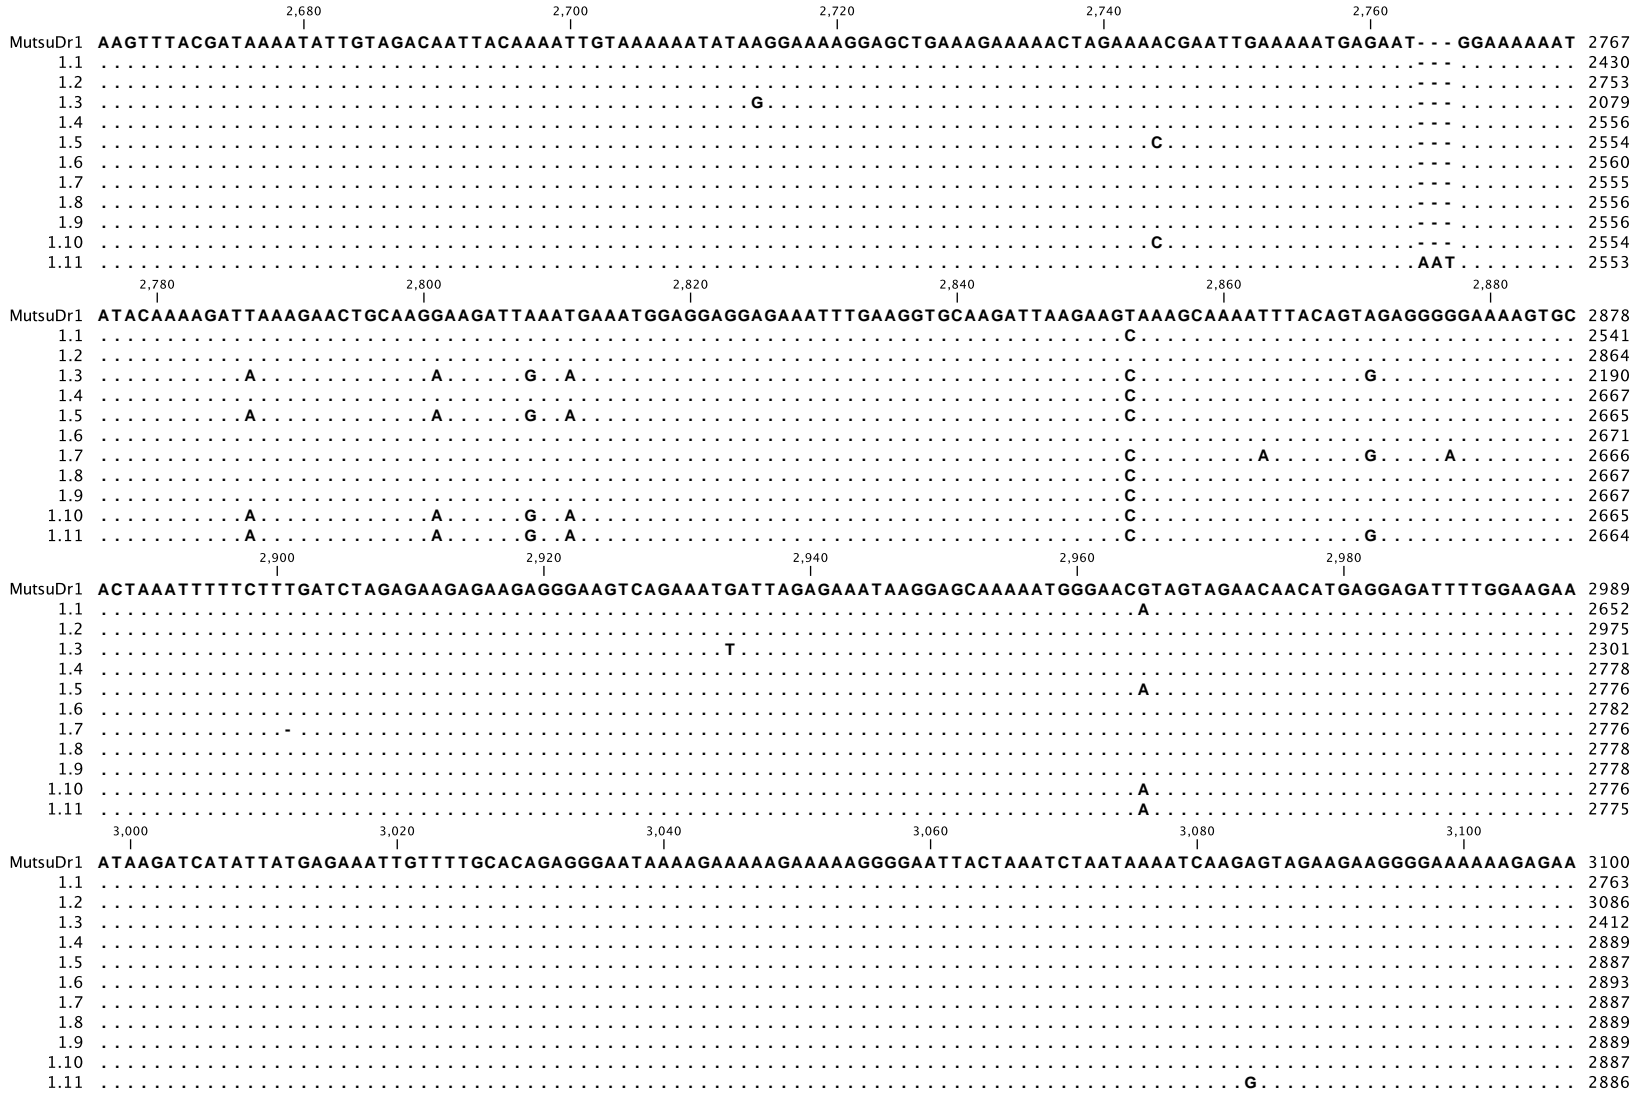

Supplemental Figure S9

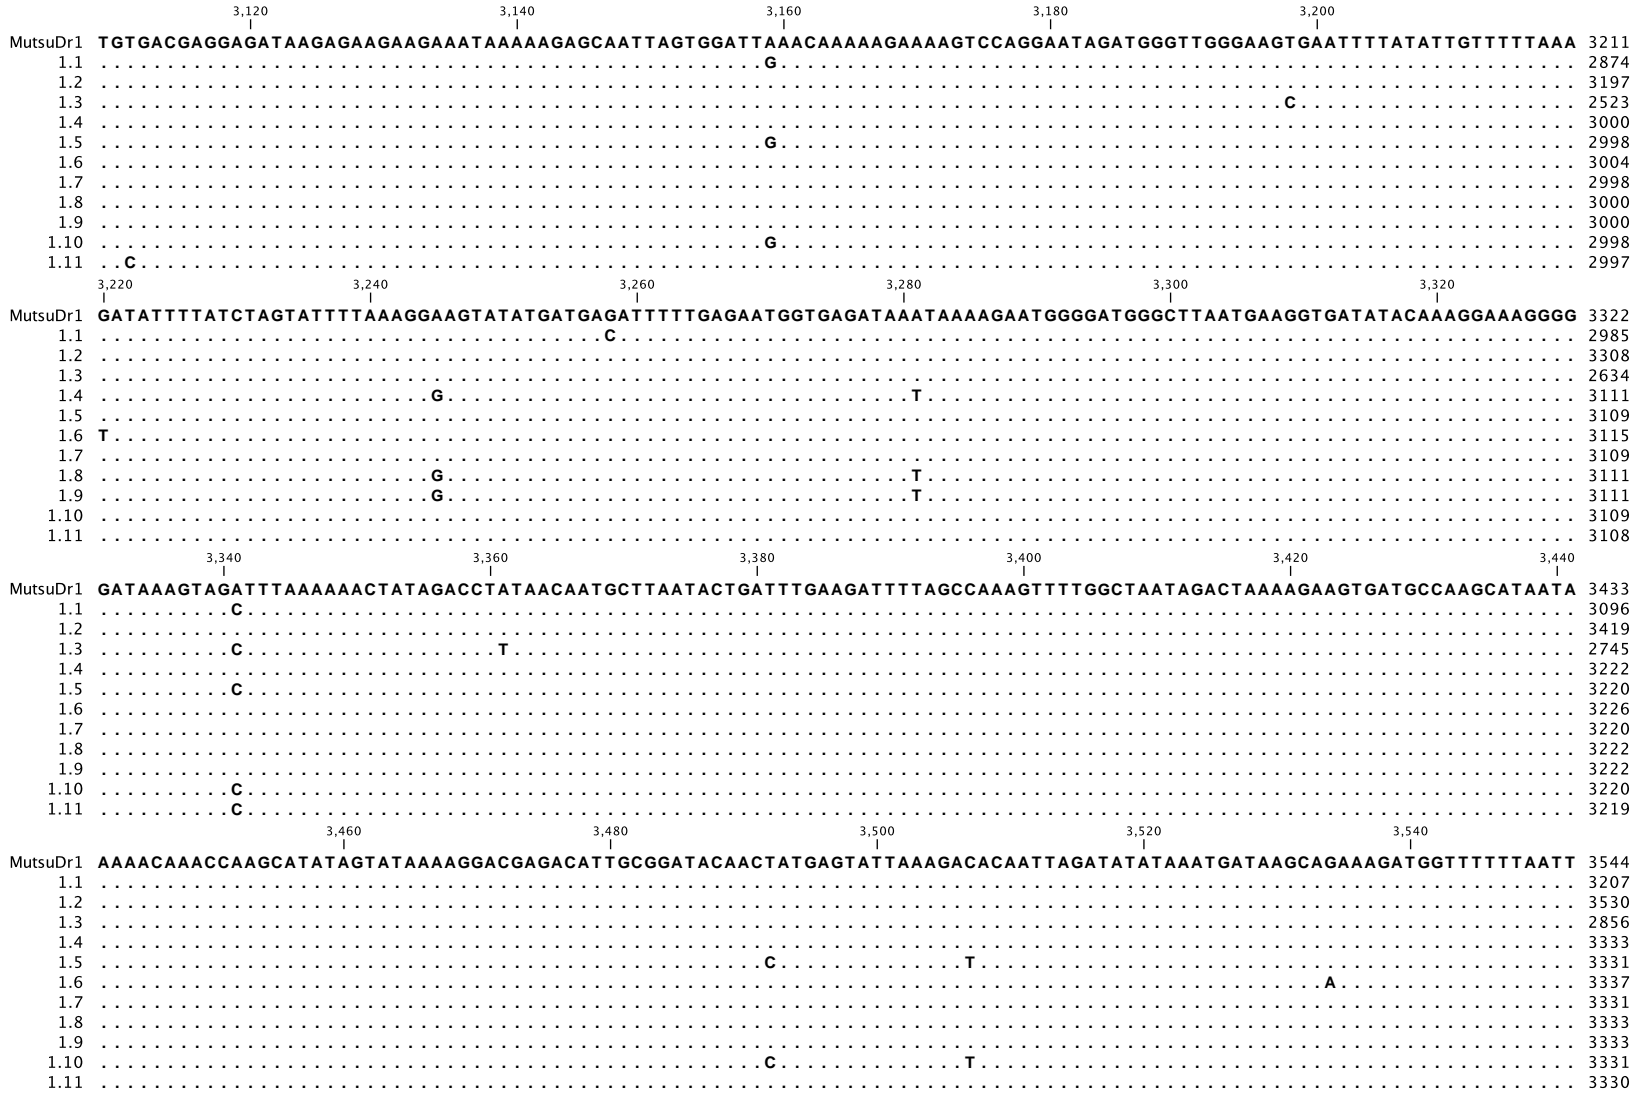



Supplemental Figure S9

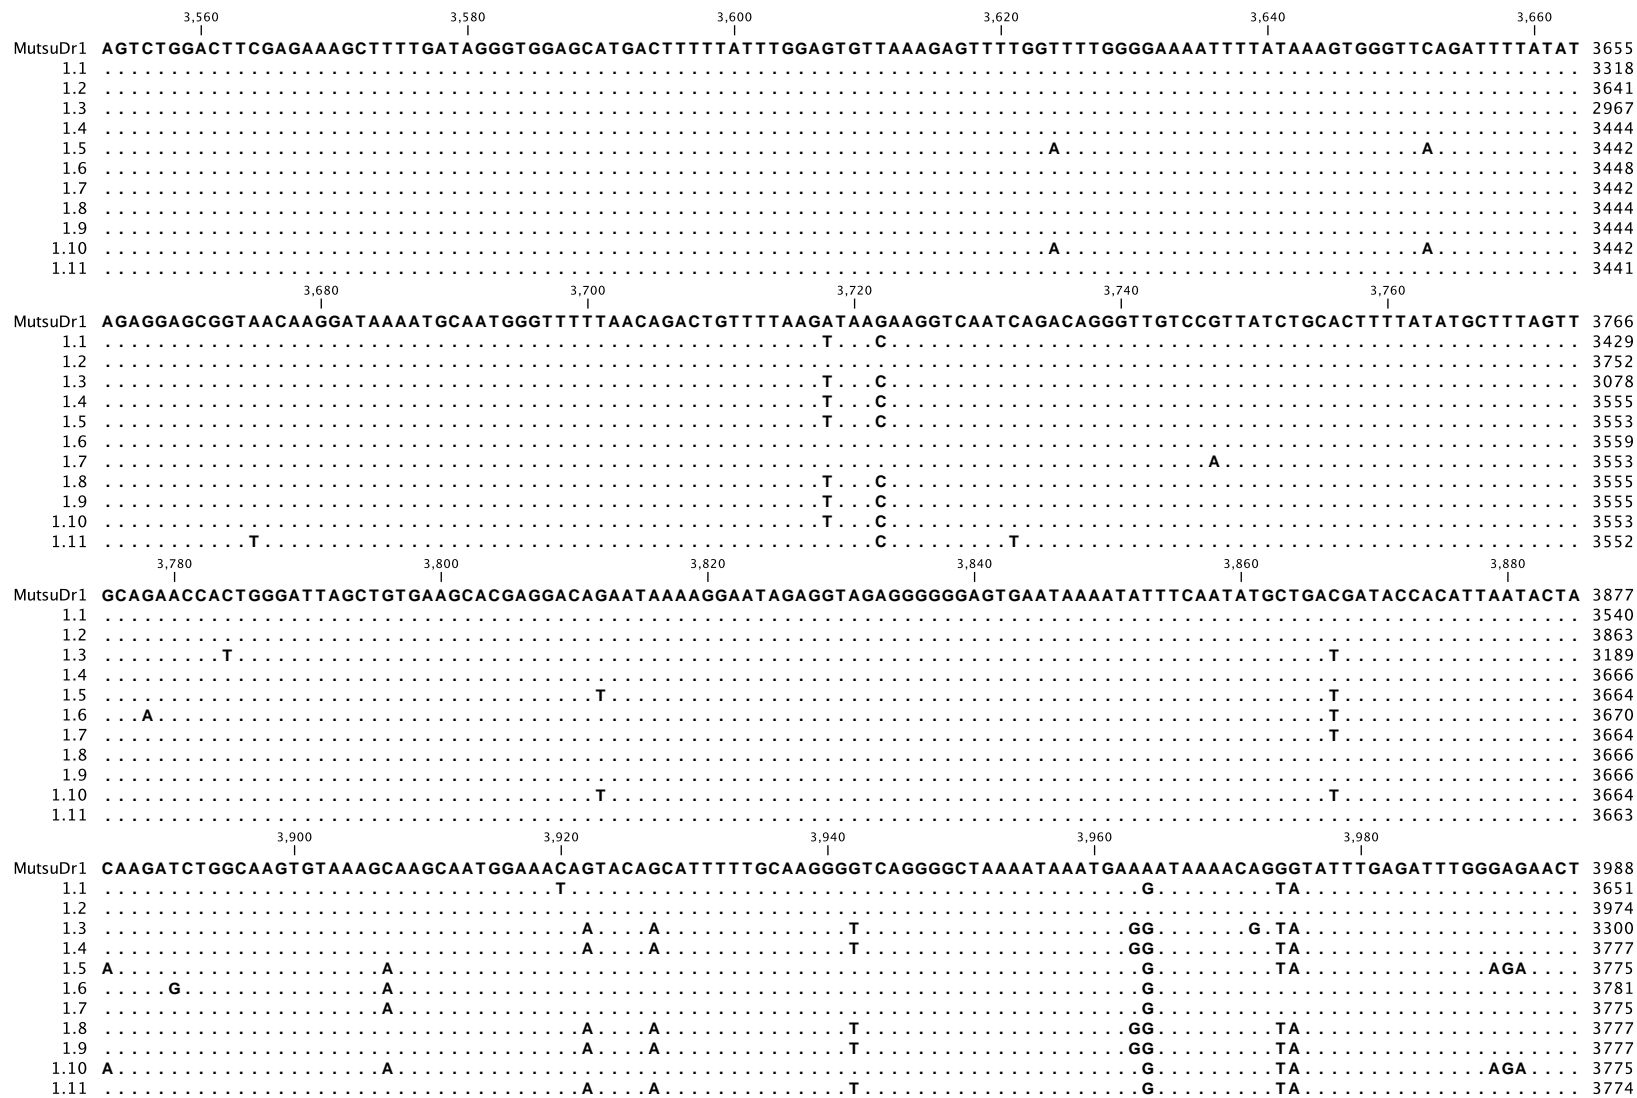

Supplemental Figure S9

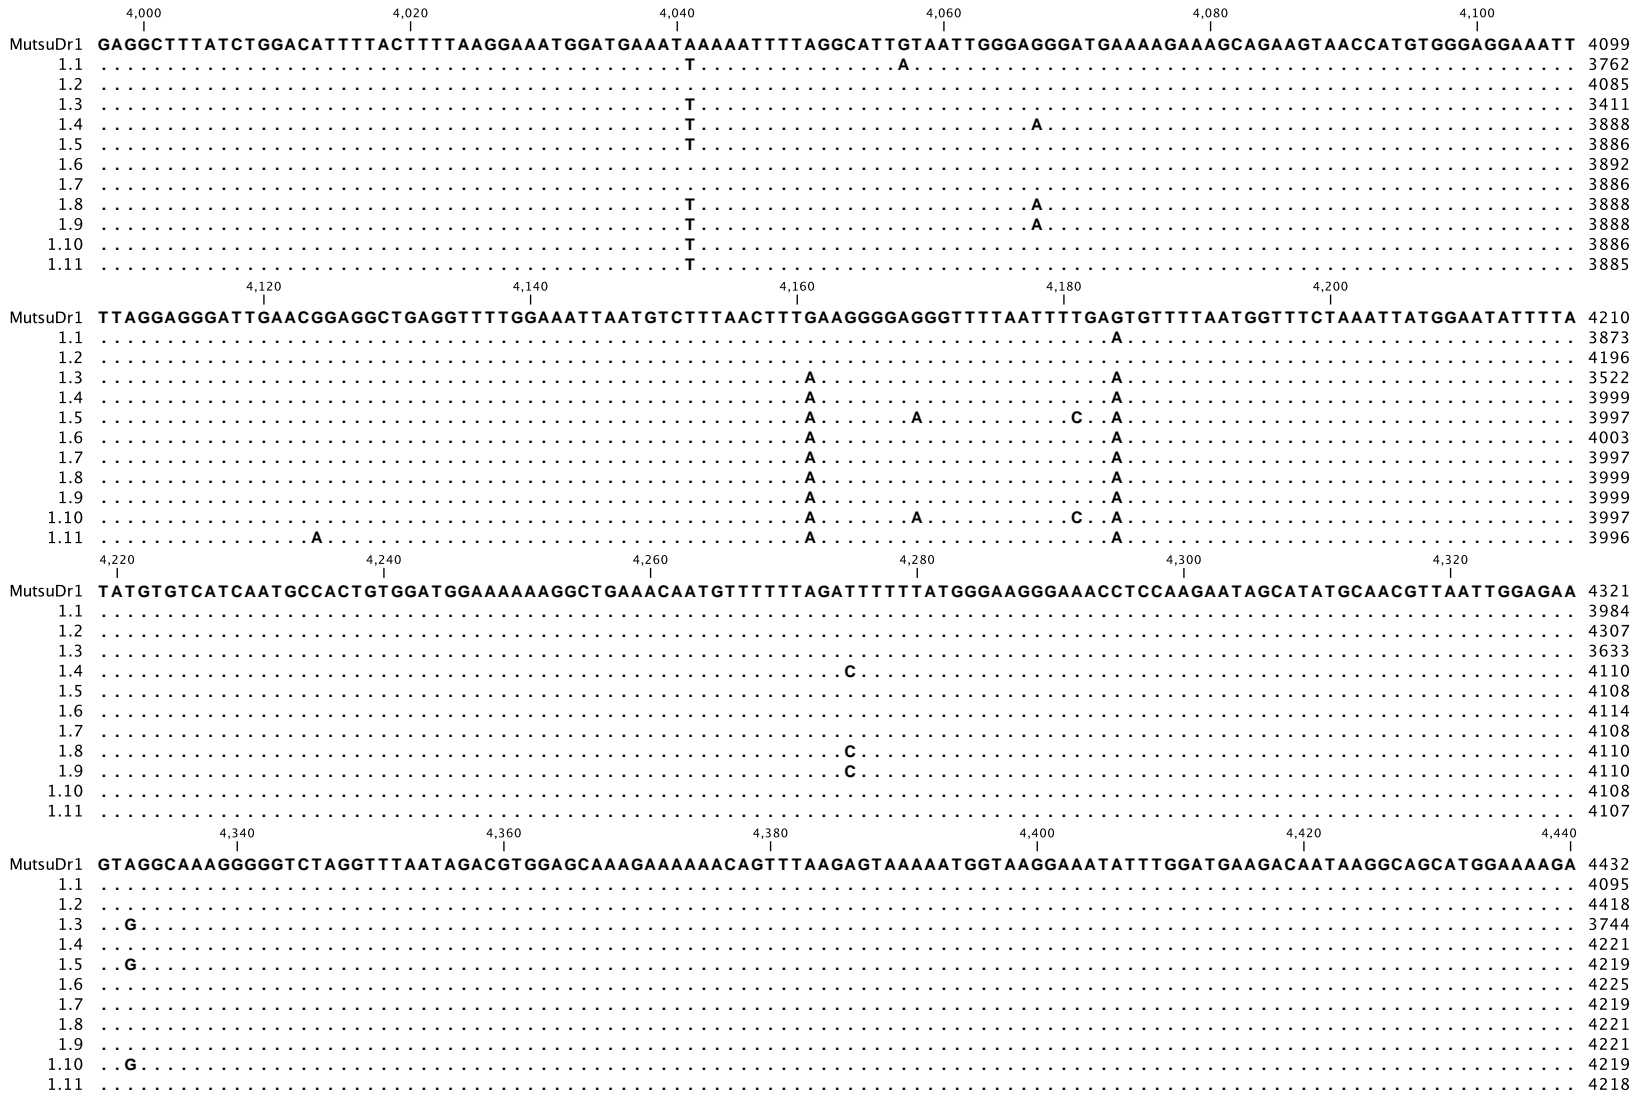

Supplemental Figure S9

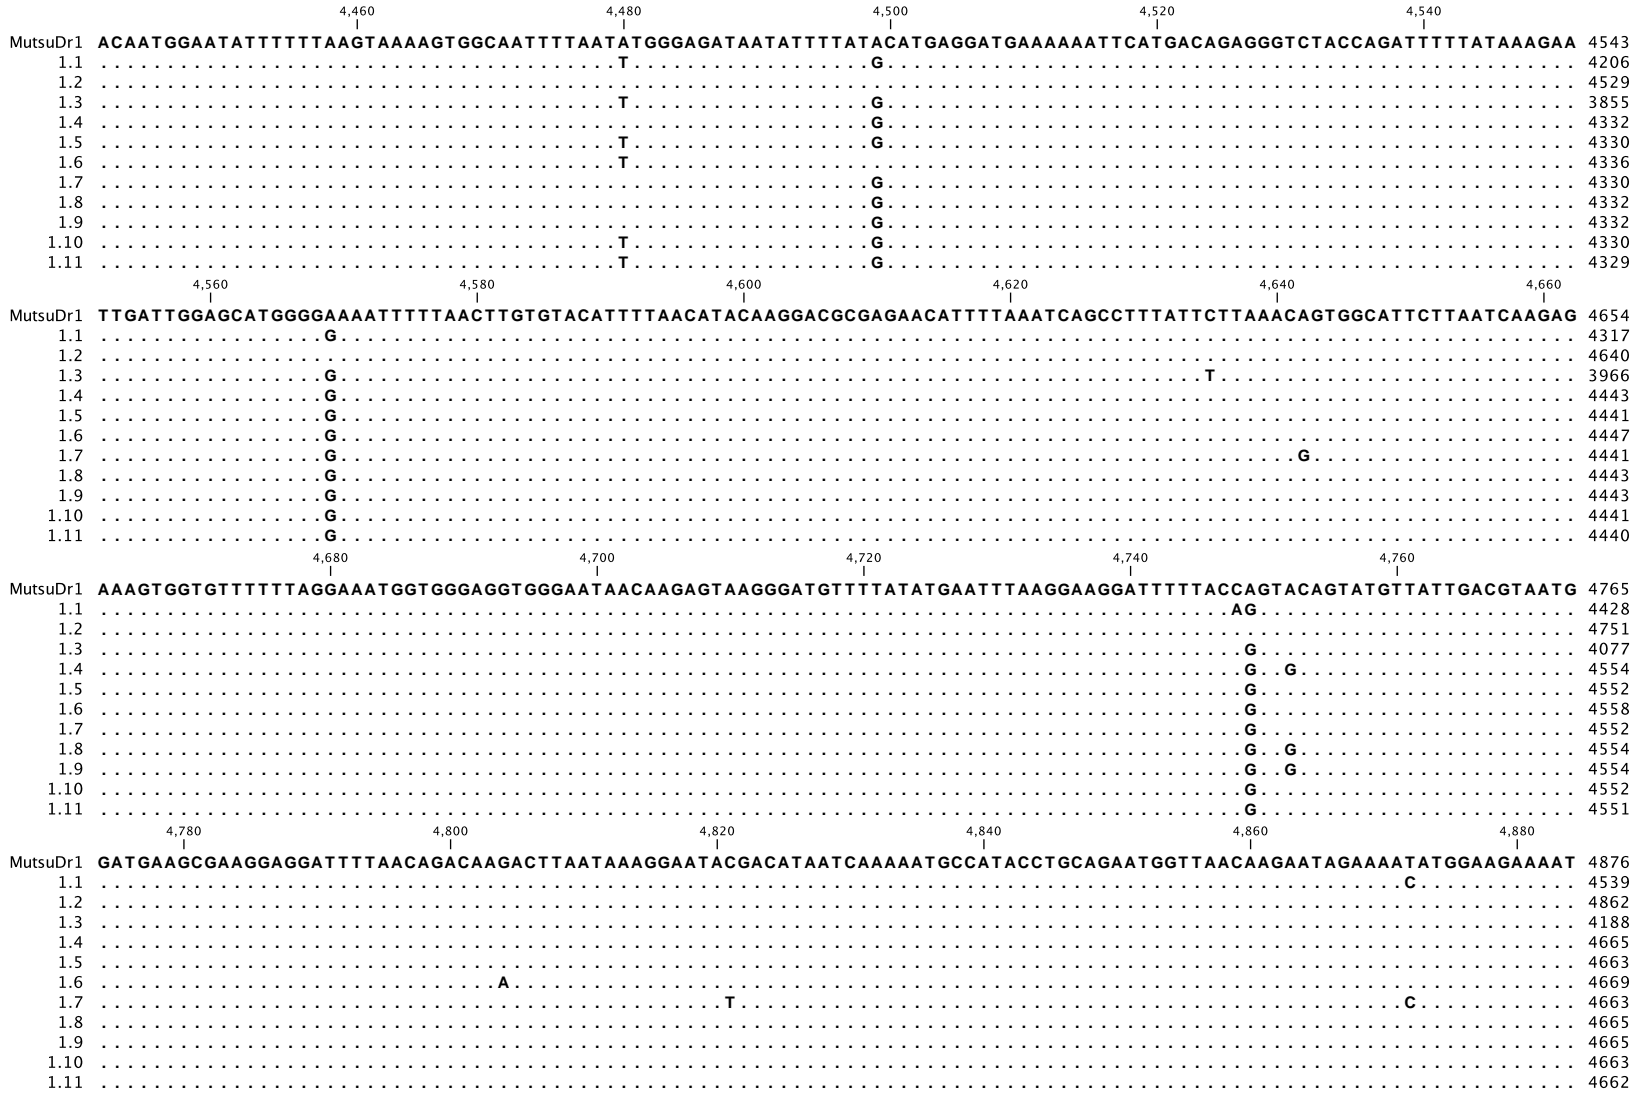

Supplemental Figure S9

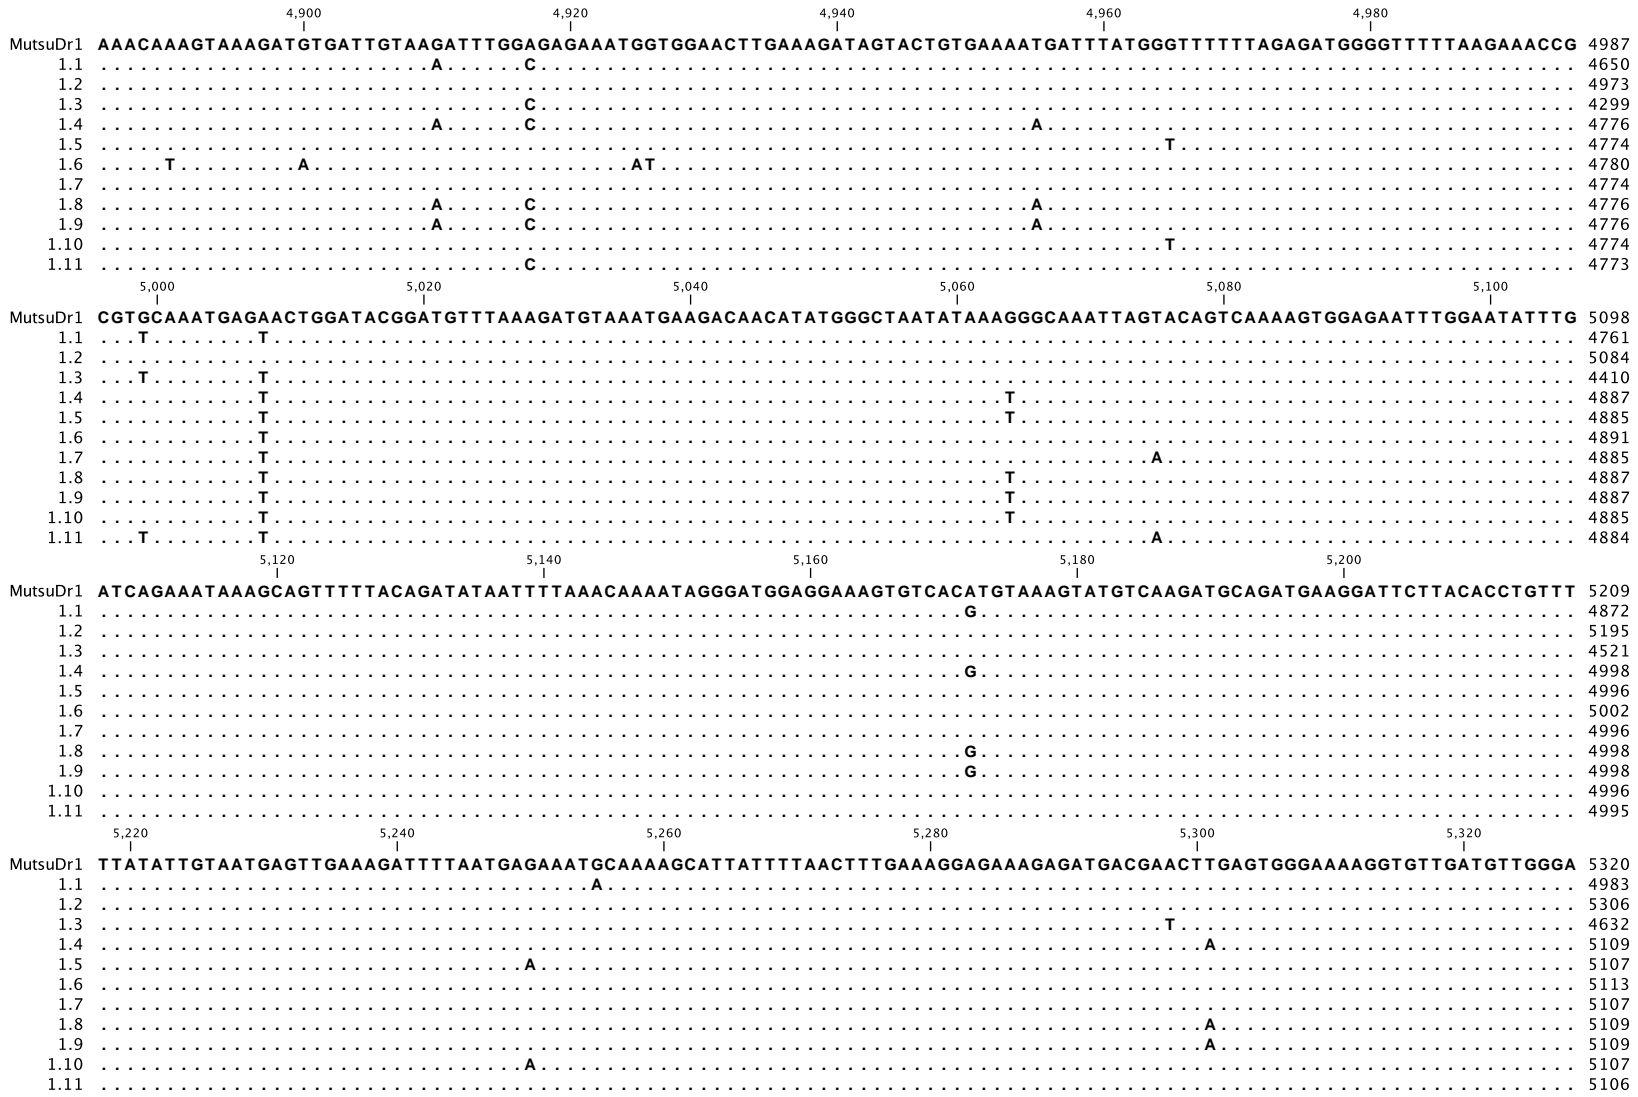

Supplemental Figure S9

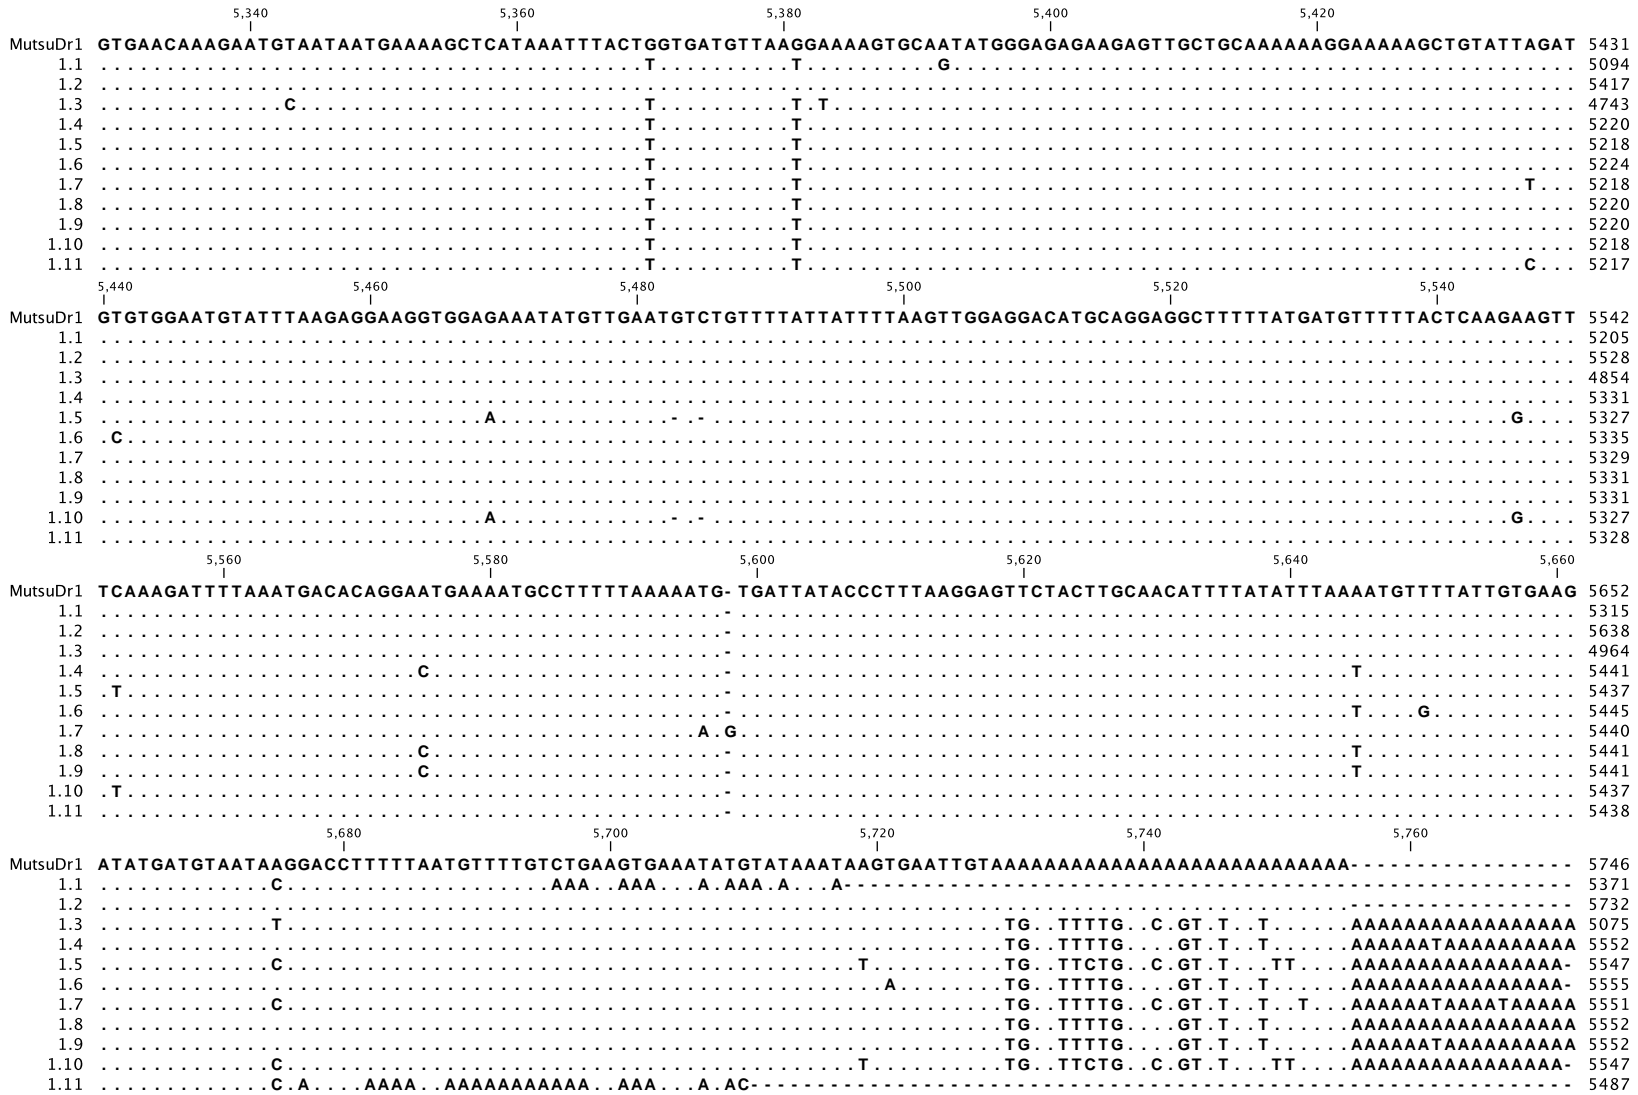

|          |                             |      |
|----------|-----------------------------|------|
|          | 5,780                       |      |
|          |                             |      |
| MutsuDr1 | -----                       | 5746 |
| 1.1      | -----                       | 5371 |
| 1.2      | -----                       | 5732 |
| 1.3      | -----                       | 5075 |
| 1.4      | AAAAAAAAAAAAAAAAAAAAA- - -  | 5574 |
| 1.5      | -----                       | 5547 |
| 1.6      | -----                       | 5555 |
| 1.7      | AATAAAAAAAAAATAAAAAATAAAAAA | 5577 |
| 1.8      | AAAAAAAAAAAAAAAAAAAAA- -    | 5576 |
| 1.9      | AAAAAAAAAAAAAAAAAAAAA- - -  | 5574 |
| 1.10     | -----                       | 5547 |
| 1.11     | -----                       | 5487 |

Supplemental Figure S9

|          |                                                                                                                          |                                                |                                                           |                                             |                                 |     |     |     |
|----------|--------------------------------------------------------------------------------------------------------------------------|------------------------------------------------|-----------------------------------------------------------|---------------------------------------------|---------------------------------|-----|-----|-----|
|          |                                                                                                                          | 20                                             | 40                                                        | 60                                          | 80                              | 100 |     |     |
| MutsuDr2 | <b>AGCACGCTAGAGGGAGCTAGAGTGC</b>                                                                                         | <b>AAACAGGAAGT</b>                             | <b>GACTGGCAGCAGT</b>                                      | <b>CAGGAGAGGAAGGCTCTCTCCATTTTTCTGTTTATT</b> | <b>-TTTTTGTGTTTTACACTTTTTGT</b> |     | 110 |     |
| 2.1      | -----                                                                                                                    |                                                |                                                           |                                             |                                 |     | -   |     |
| 2.2      | .....                                                                                                                    |                                                |                                                           |                                             |                                 |     | T   | 110 |
| 2.3      | .....                                                                                                                    |                                                |                                                           |                                             |                                 |     | A   | 109 |
| 2.4      | .....                                                                                                                    |                                                |                                                           |                                             |                                 |     | T   | 110 |
| 2.5      | .....                                                                                                                    |                                                |                                                           |                                             |                                 |     |     | 110 |
| 2.6      | -----                                                                                                                    |                                                |                                                           |                                             |                                 |     | -   |     |
| 2.7      | .....                                                                                                                    |                                                |                                                           |                                             |                                 |     | T   | 110 |
| 2.8      | .....                                                                                                                    |                                                |                                                           |                                             |                                 |     | T   | 110 |
| 2.9      | .....                                                                                                                    |                                                |                                                           |                                             |                                 |     | C   | 106 |
| 2.10     | .....                                                                                                                    |                                                |                                                           |                                             |                                 |     | A   | 110 |
| 2.11     | .....                                                                                                                    |                                                |                                                           |                                             |                                 |     | A   | 110 |
| S2.1     | .....                                                                                                                    |                                                |                                                           |                                             |                                 |     | A   | 110 |
| S2.2     | .....                                                                                                                    |                                                |                                                           |                                             |                                 |     | A   | 110 |
|          | 120                                                                                                                      | 140                                            | 160                                                       | 180                                         | 200                             | 220 |     |     |
| MutsuDr2 | <b>GGACTGATATAGTTTTTTT</b>                                                                                               | <b>-GTTTTGATTTTTGTTTTTAACCACCTGACAGCAGCATT</b> | <b>TTTGCTGGCTGGAGGGTGGTTTTTTGCGTGTGTTTTTTGCTATGGAGCAA</b> |                                             |                                 |     | 220 |     |
| 2.1      | -----                                                                                                                    |                                                |                                                           |                                             |                                 |     | -   |     |
| 2.2      | .....                                                                                                                    |                                                |                                                           |                                             |                                 |     | T   |     |
| 2.3      | .....                                                                                                                    |                                                |                                                           |                                             |                                 |     | G   | 221 |
| 2.4      | .....                                                                                                                    |                                                |                                                           |                                             |                                 |     | G   | 182 |
| 2.5      | .....                                                                                                                    |                                                |                                                           |                                             |                                 |     |     | 220 |
| 2.6      | -----                                                                                                                    |                                                |                                                           |                                             |                                 |     | -   |     |
| 2.7      | .....                                                                                                                    |                                                |                                                           |                                             |                                 |     | G   | 220 |
| 2.8      | .....                                                                                                                    |                                                |                                                           |                                             |                                 |     | G   | 220 |
| 2.9      | .....                                                                                                                    |                                                |                                                           |                                             |                                 |     | C   | 216 |
| 2.10     | .....                                                                                                                    |                                                |                                                           |                                             |                                 |     | T   | 220 |
| 2.11     | .....                                                                                                                    |                                                |                                                           |                                             |                                 |     | C   | 220 |
| S2.1     | .....                                                                                                                    |                                                |                                                           |                                             |                                 |     | A   | 220 |
| S2.2     | .....                                                                                                                    |                                                |                                                           |                                             |                                 |     | A   | 220 |
|          | 240                                                                                                                      | 260                                            | 280                                                       | 300                                         | 320                             |     |     |     |
| MutsuDr2 | <b>ACAAAGGACGGATTGATGGCAAACGACCCTGGACTGGATGCAGAGACACGAAAGGAATATGAAACAGGACTGGATGACGAGACAAGAATGGTTAAAGACAACGGACTGGAA</b>   |                                                |                                                           |                                             |                                 |     | 331 |     |
| 2.1      | -----                                                                                                                    |                                                |                                                           |                                             |                                 |     | -   |     |
| 2.2      | .....                                                                                                                    |                                                |                                                           |                                             |                                 |     |     | 332 |
| 2.3      | .....                                                                                                                    |                                                |                                                           |                                             |                                 |     | A   | 293 |
| 2.4      | .....                                                                                                                    |                                                |                                                           |                                             |                                 |     |     | 331 |
| 2.5      | .....                                                                                                                    |                                                |                                                           |                                             |                                 |     |     | 331 |
| 2.6      | -----                                                                                                                    |                                                |                                                           |                                             |                                 |     | -   |     |
| 2.7      | .....                                                                                                                    |                                                |                                                           |                                             |                                 |     |     | 331 |
| 2.8      | .....                                                                                                                    |                                                |                                                           |                                             |                                 |     |     | 331 |
| 2.9      | .....                                                                                                                    |                                                |                                                           |                                             |                                 |     | T   | 327 |
| 2.10     | .....                                                                                                                    |                                                |                                                           |                                             |                                 |     | T   | 331 |
| 2.11     | .....                                                                                                                    |                                                |                                                           |                                             |                                 |     | T   | 331 |
| S2.1     | .....                                                                                                                    |                                                |                                                           |                                             |                                 |     | T   | 331 |
| S2.2     | .....                                                                                                                    |                                                |                                                           |                                             |                                 |     | T   | 331 |
|          | 340                                                                                                                      | 360                                            | 380                                                       | 400                                         | 420                             | 440 |     |     |
| MutsuDr2 | <b>AATGGACAACGAGCTGGACAACGGAAAAGCCAAAGTAGGTGGAAGAAAGTATTTAAAGGAGGCAACAGTTATCATTAAATGTGGAAGATGTACAGGAAGTGAGAGCAGAAGAT</b> |                                                |                                                           |                                             |                                 |     | 442 |     |
| 2.1      | -----                                                                                                                    |                                                |                                                           |                                             |                                 |     |     | 83  |
| 2.2      | .....                                                                                                                    |                                                |                                                           |                                             |                                 |     |     | 443 |
| 2.3      | .....                                                                                                                    |                                                |                                                           |                                             |                                 |     |     | 404 |
| 2.4      | .....                                                                                                                    |                                                |                                                           |                                             |                                 |     | A   | 442 |
| 2.5      | .....                                                                                                                    |                                                |                                                           |                                             |                                 |     | A   | 442 |
| 2.6      | .....                                                                                                                    |                                                |                                                           |                                             |                                 |     | A   | 83  |
| 2.7      | .....                                                                                                                    |                                                |                                                           |                                             |                                 |     | A   | 442 |
| 2.8      | .....                                                                                                                    |                                                |                                                           |                                             |                                 |     | A   | 442 |
| 2.9      | .....                                                                                                                    |                                                |                                                           |                                             |                                 |     | T   | 437 |
| 2.10     | .....                                                                                                                    |                                                |                                                           |                                             |                                 |     | A   | 442 |
| 2.11     | .....                                                                                                                    |                                                |                                                           |                                             |                                 |     |     | 442 |
| S2.1     | .....                                                                                                                    |                                                |                                                           |                                             |                                 |     |     | 442 |
| S2.2     | .....                                                                                                                    |                                                |                                                           |                                             |                                 |     |     | 442 |

Supplemental Figure S9

|          |                                                                                                                         |                |                |                |                |     |                |                |  |                |                |     |
|----------|-------------------------------------------------------------------------------------------------------------------------|----------------|----------------|----------------|----------------|-----|----------------|----------------|--|----------------|----------------|-----|
|          |                                                                                                                         | 460            |                | 480            |                | 500 |                | 520            |  | 540            |                |     |
| MutsuDr2 | <b>ATTATTAAGCGGTGATTGAAAAGTGTGGACATGGAAAAATTCTGGCTTTAAGACCAAGACAAGGGAAGGAGTACGAACTAACAAATGGAACAGAGAATTATGTGAACAA</b>    |                |                |                |                |     |                |                |  |                | 553            |     |
| 2.1      | .....                                                                                                                   |                |                |                |                |     |                |                |  |                | 194            |     |
| 2.2      | .....                                                                                                                   |                |                |                |                |     |                |                |  |                | 554            |     |
| 2.3      | .....                                                                                                                   |                |                |                |                |     |                |                |  | <b>G</b> ..... | 515            |     |
| 2.4      | .....                                                                                                                   |                |                |                |                |     |                |                |  |                | 553            |     |
| 2.5      | .....                                                                                                                   |                | <b>A</b> ..... |                |                |     |                |                |  | <b>G</b> ..... | 553            |     |
| 2.6      | .....                                                                                                                   |                |                |                |                |     |                |                |  |                | 194            |     |
| 2.7      | .....                                                                                                                   |                |                |                |                |     |                |                |  |                | 553            |     |
| 2.8      | .....                                                                                                                   |                |                |                |                |     |                |                |  |                | 553            |     |
| 2.9      | .....                                                                                                                   |                |                |                |                |     | <b>A</b> ..... |                |  |                | 548            |     |
| 2.10     | .....                                                                                                                   | <b>A</b> ..... |                |                |                |     |                |                |  |                | 553            |     |
| 2.11     | .....                                                                                                                   | <b>A</b> ..... |                |                |                |     |                |                |  |                | 553            |     |
| S2.1     | .....                                                                                                                   | <b>A</b> ..... |                |                |                |     |                |                |  |                | 553            |     |
| S2.2     | .....                                                                                                                   | <b>A</b> ..... |                |                |                |     |                |                |  |                | 553            |     |
|          |                                                                                                                         | 560            |                | 580            |                | 600 |                | 620            |  | 640            |                | 660 |
| MutsuDr2 | <b>TTGACTGACAACTGATGATAAATGGGGTGAAGTGTGAAATTAAGGCTTCATAATAGGGATTTGTTGTTTCCTTCATGCACCTGCCGGTCTATCTTGAAGATAAGGAA</b>      |                |                |                |                |     |                |                |  |                |                | 664 |
| 2.1      | .....                                                                                                                   |                |                |                |                |     |                |                |  |                |                | 305 |
| 2.2      | .....                                                                                                                   |                | <b>C</b> ..... |                |                |     |                |                |  |                |                | 665 |
| 2.3      | .....                                                                                                                   |                |                |                |                |     |                |                |  |                |                | 626 |
| 2.4      | .....                                                                                                                   |                | <b>C</b> ..... |                |                |     |                |                |  |                |                | 664 |
| 2.5      | .....                                                                                                                   |                |                |                |                |     |                |                |  |                |                | 664 |
| 2.6      | .....                                                                                                                   |                |                |                |                |     |                |                |  |                |                | 305 |
| 2.7      | .....                                                                                                                   |                | <b>C</b> ..... |                |                |     |                |                |  |                |                | 664 |
| 2.8      | .....                                                                                                                   |                | <b>C</b> ..... |                |                |     |                |                |  |                |                | 664 |
| 2.9      | .....                                                                                                                   |                | <b>C</b> ..... |                |                |     |                |                |  | <b>A</b> ..... |                | 659 |
| 2.10     | .....                                                                                                                   |                |                |                |                |     |                |                |  |                | <b>G</b> ..... | 664 |
| 2.11     | .....                                                                                                                   |                |                |                |                |     |                |                |  |                | <b>G</b> ..... | 664 |
| S2.1     | .....                                                                                                                   |                |                |                |                |     |                |                |  |                | <b>G</b> ..... | 664 |
| S2.2     | .....                                                                                                                   |                |                |                |                |     |                |                |  |                | <b>G</b> ..... | 664 |
|          |                                                                                                                         | 680            |                | 700            |                | 720 |                | 740            |  | 760            |                |     |
| MutsuDr2 | <b>ATTCTGGAAAATTAGATACTTGGGGAGTTTGTCCCATATCTAAAATTAACGAAGGTTTTATCCGGGTACCGACATAGAAGACGGAACAAGTTTCCTTAAAGTGAGGTTTC</b>   |                |                |                |                |     |                |                |  |                |                | 775 |
| 2.1      | .....                                                                                                                   |                |                |                |                |     |                |                |  |                |                | 416 |
| 2.2      | .....                                                                                                                   | <b>G</b> ..... |                |                |                |     |                |                |  |                |                | 776 |
| 2.3      | .....                                                                                                                   | <b>G</b> ..... |                |                |                |     |                |                |  |                |                | 737 |
| 2.4      | .....                                                                                                                   | <b>G</b> ..... |                |                |                |     |                |                |  |                |                | 775 |
| 2.5      | .....                                                                                                                   | <b>G</b> ..... |                |                |                |     |                |                |  |                |                | 775 |
| 2.6      | .....                                                                                                                   |                |                |                |                |     |                |                |  |                |                | 416 |
| 2.7      | .....                                                                                                                   | <b>G</b> ..... |                |                |                |     |                |                |  |                |                | 775 |
| 2.8      | .....                                                                                                                   | <b>G</b> ..... |                |                |                |     |                |                |  |                |                | 775 |
| 2.9      | .....                                                                                                                   |                |                |                |                |     |                |                |  |                |                | 770 |
| 2.10     | .....                                                                                                                   |                |                |                |                |     |                |                |  |                |                | 775 |
| 2.11     | .....                                                                                                                   |                |                |                |                |     |                |                |  |                |                | 775 |
| S2.1     | .....                                                                                                                   |                |                |                |                |     |                |                |  |                |                | 775 |
| S2.2     | .....                                                                                                                   |                |                |                |                |     |                |                |  |                |                | 775 |
|          |                                                                                                                         | 780            |                | 800            |                | 820 |                | 840            |  | 860            |                | 880 |
| MutsuDr2 | <b>CCTAAGAGGTGGCATCCTTGCCATACAGCACAAAAATAGAGACAGCAGAGAAGGAACGCAGTACTTCAGGGTGATGCACAGCCATCAGGTGAAGACCTGTAGGCTGTGCATG</b> |                |                |                |                |     |                |                |  |                |                | 886 |
| 2.1      | .....                                                                                                                   |                |                |                |                |     |                |                |  |                |                | 527 |
| 2.2      | .....                                                                                                                   |                | <b>T</b> ..... |                | <b>G</b> ..... |     |                |                |  |                |                | 887 |
| 2.3      | .....                                                                                                                   |                | <b>T</b> ..... |                | <b>G</b> ..... |     |                | <b>T</b> ..... |  |                |                | 848 |
| 2.4      | .....                                                                                                                   |                | <b>T</b> ..... |                | <b>G</b> ..... |     |                |                |  |                |                | 886 |
| 2.5      | .....                                                                                                                   | <b>A</b> ..... |                | <b>T</b> ..... | <b>G</b> ..... |     |                |                |  |                |                | 886 |
| 2.6      | .....                                                                                                                   |                |                |                | <b>G</b> ..... |     |                | <b>T</b> ..... |  |                |                | 527 |
| 2.7      | .....                                                                                                                   |                | <b>T</b> ..... |                | <b>G</b> ..... |     |                |                |  |                |                | 886 |
| 2.8      | .....                                                                                                                   |                | <b>T</b> ..... |                | <b>G</b> ..... |     |                |                |  |                |                | 886 |
| 2.9      | .....                                                                                                                   |                | <b>T</b> ..... |                |                |     |                |                |  | <b>A</b> ..... |                | 881 |
| 2.10     | .....                                                                                                                   |                |                |                | <b>G</b> ..... |     |                |                |  |                |                | 886 |
| 2.11     | .....                                                                                                                   |                |                |                | <b>G</b> ..... |     |                |                |  |                |                | 886 |
| S2.1     | .....                                                                                                                   |                |                |                | <b>G</b> ..... |     |                |                |  |                |                | 886 |
| S2.2     | .....                                                                                                                   |                |                |                | <b>G</b> ..... |     |                |                |  |                |                | 886 |



Supplemental Figure S9

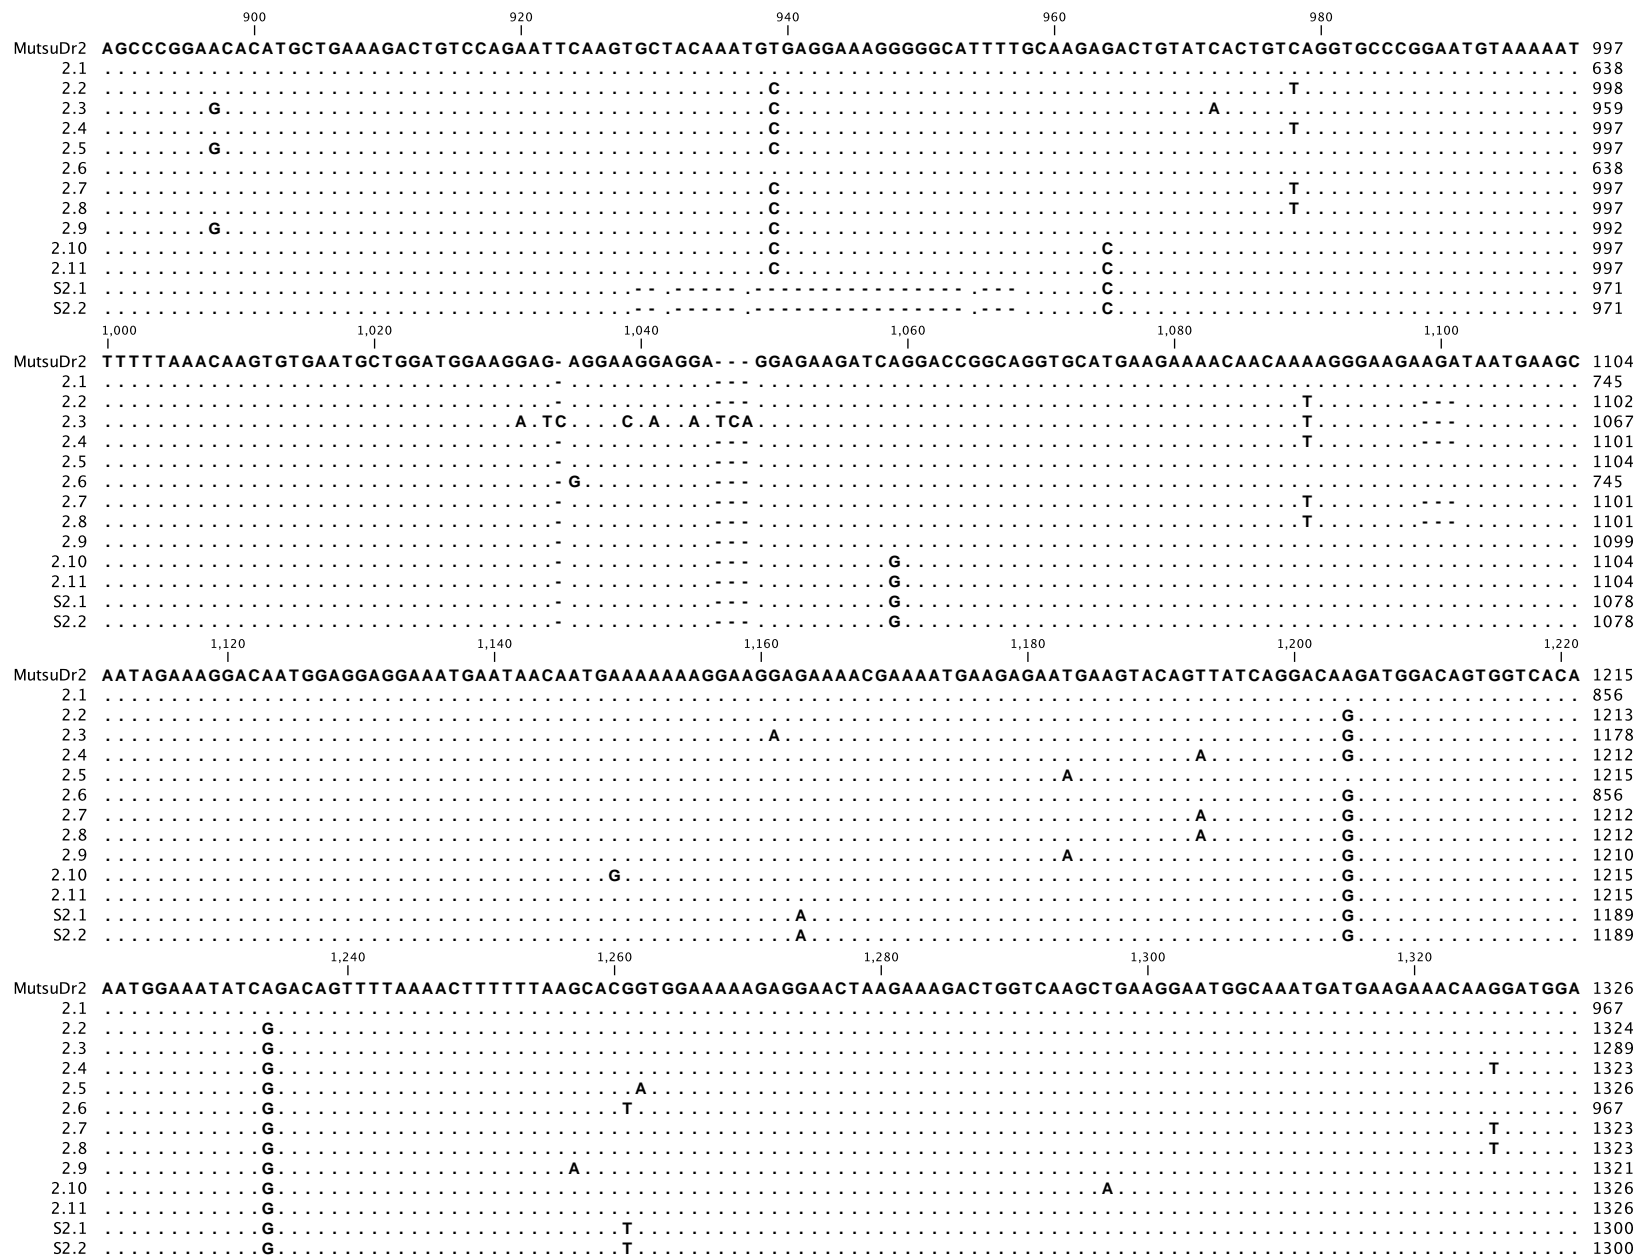

Supplemental Figure S9

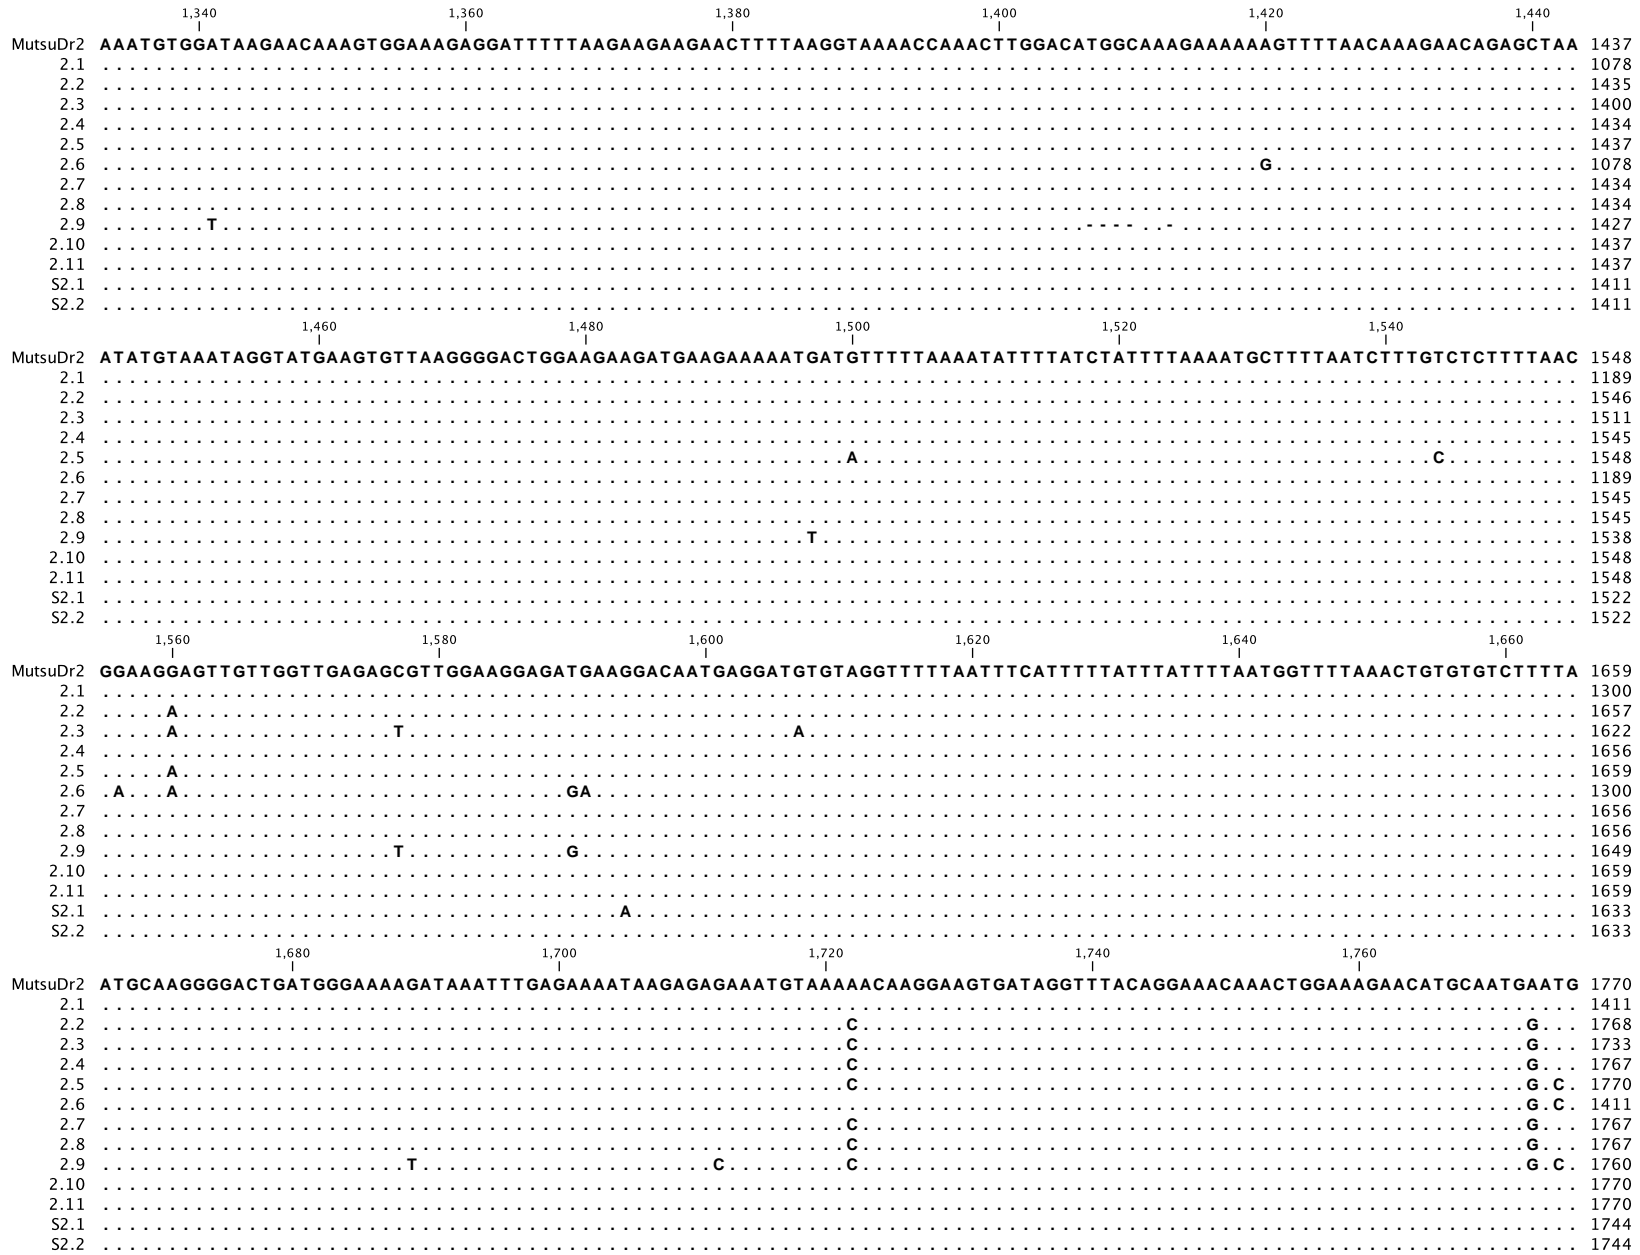

Supplemental Figure S9

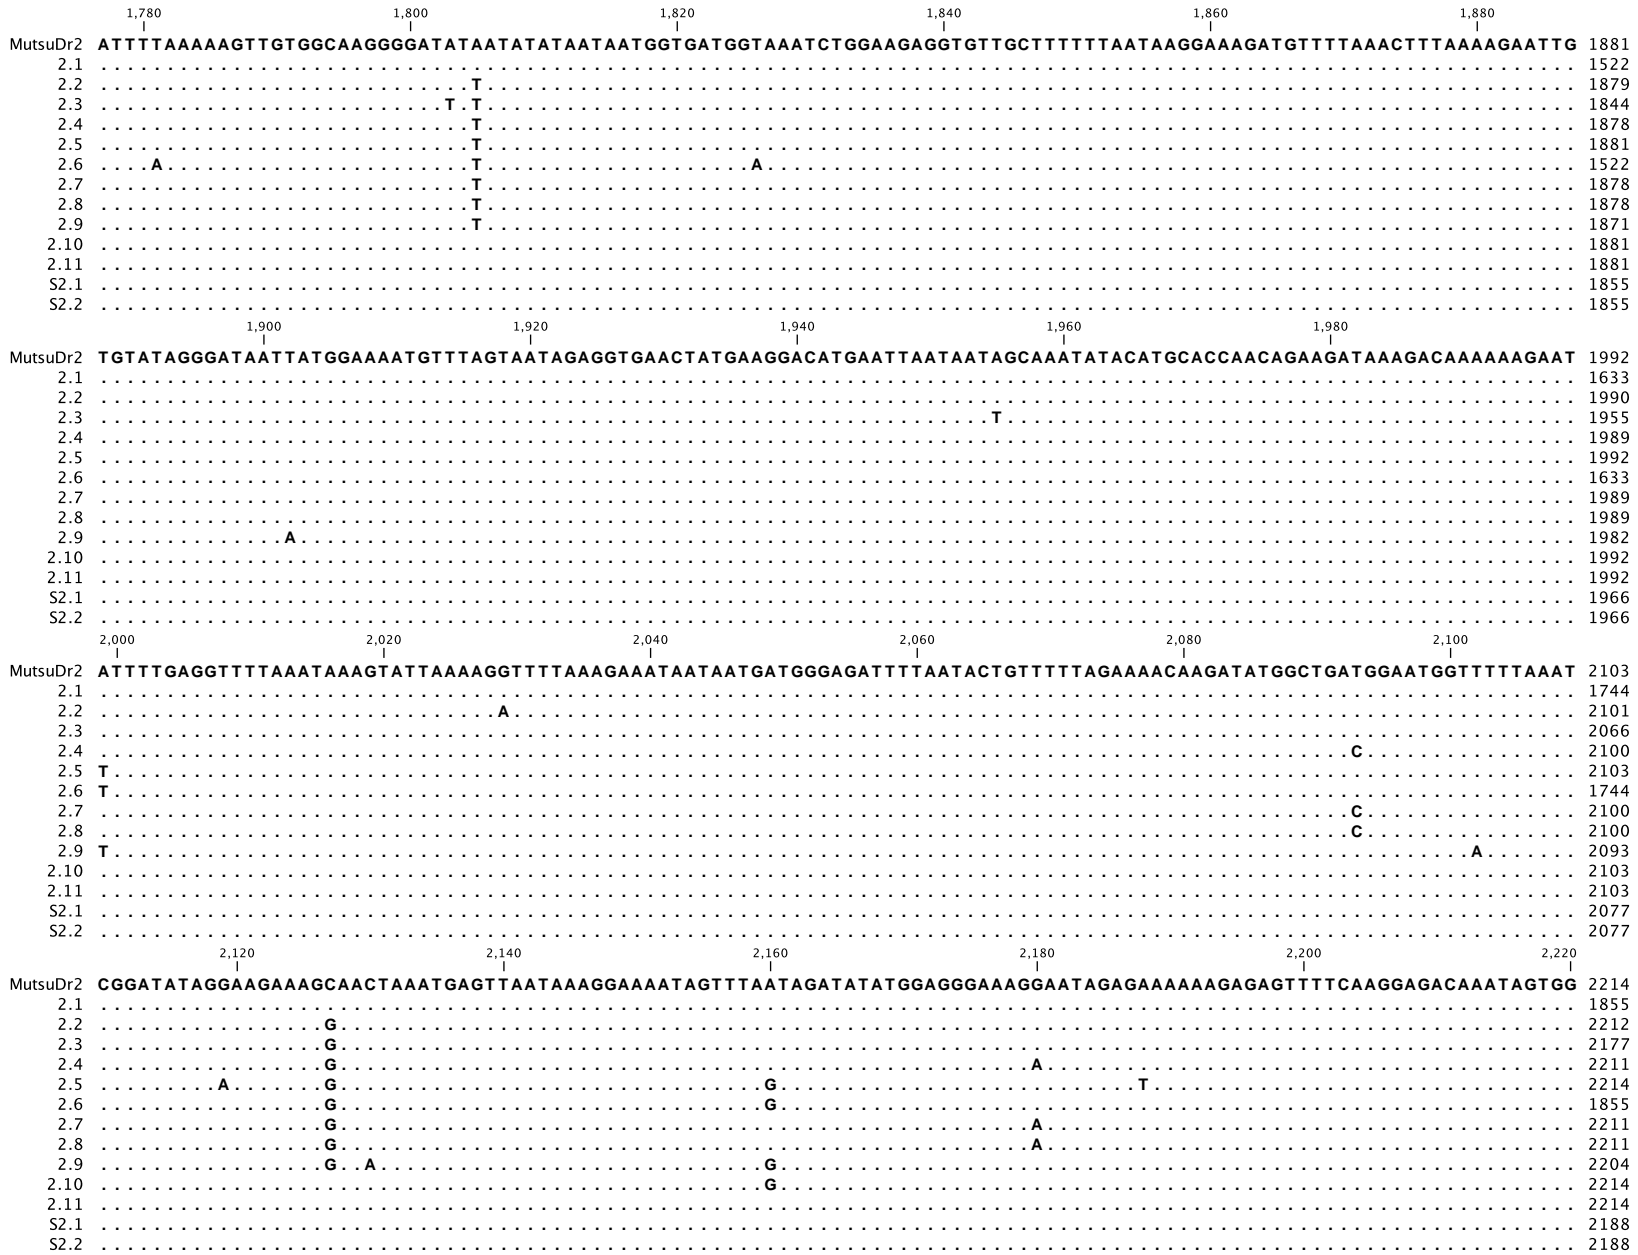

Supplemental Figure S9

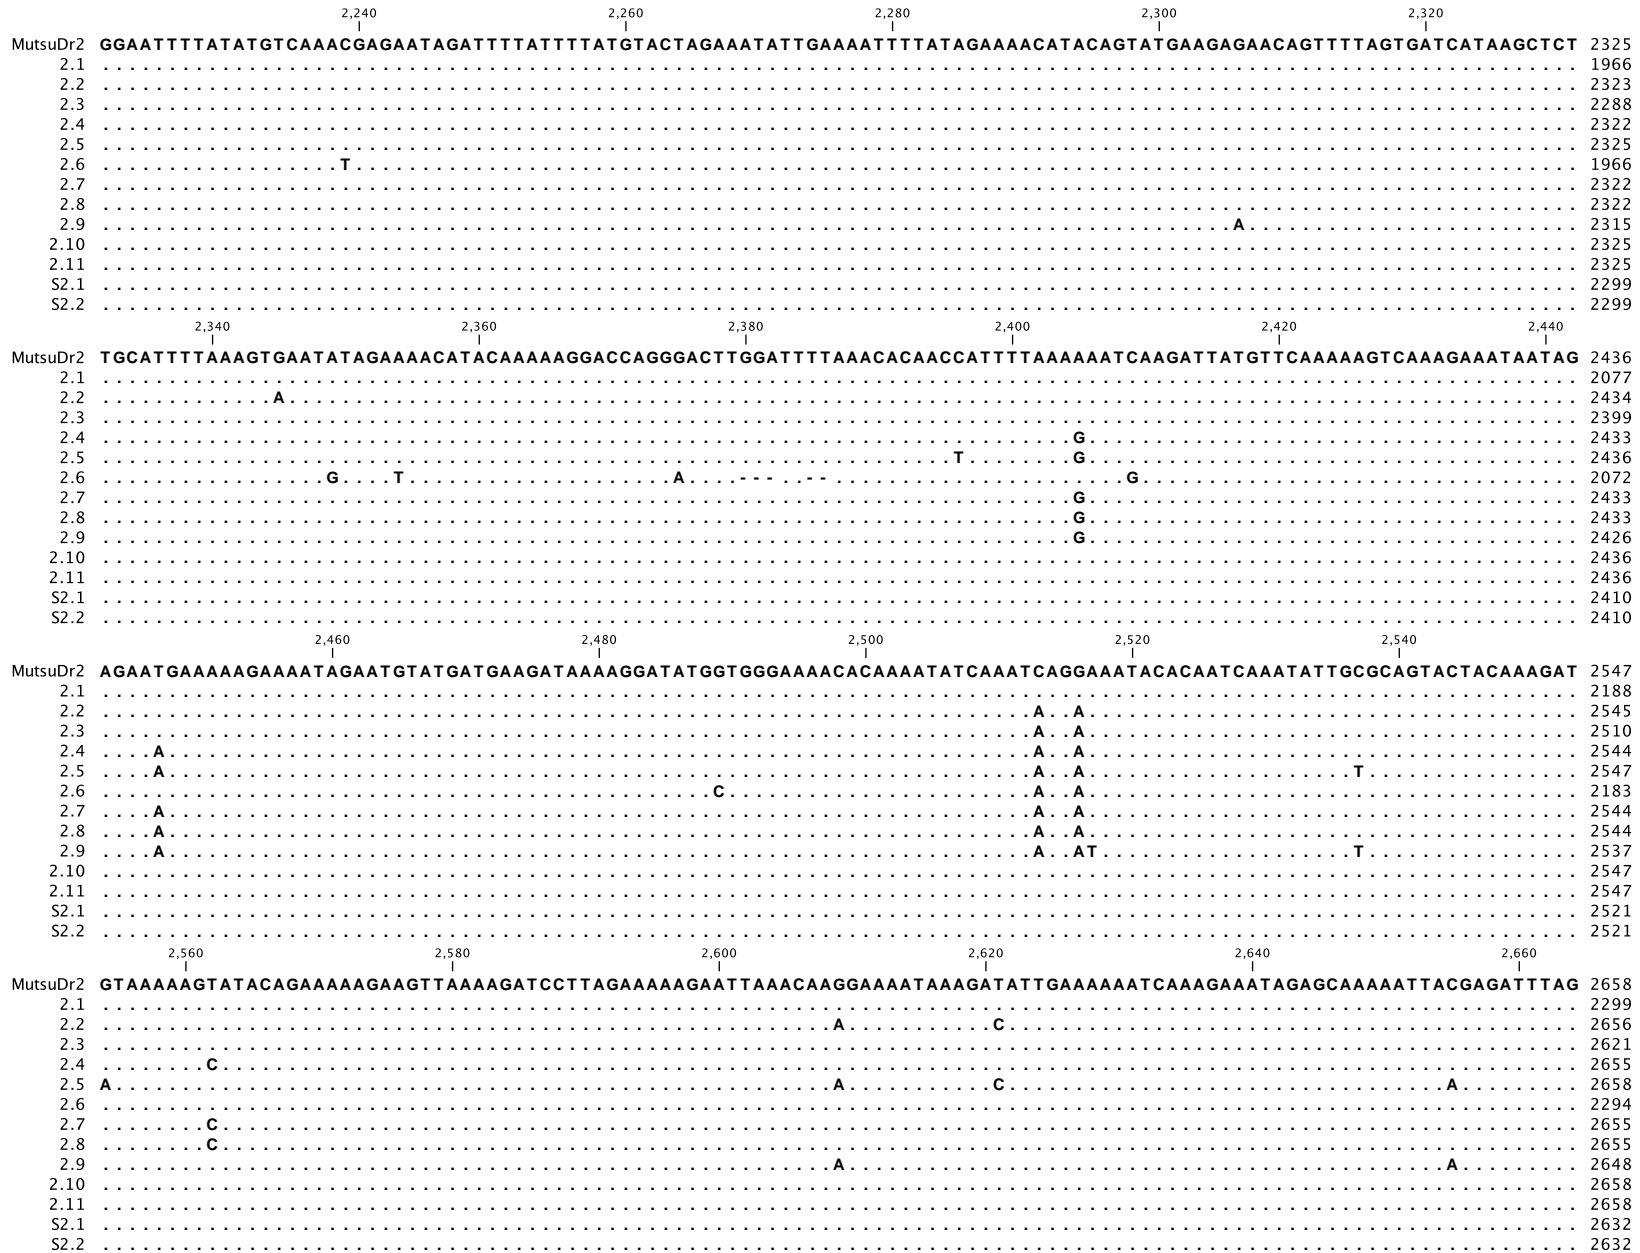

Supplemental Figure S9

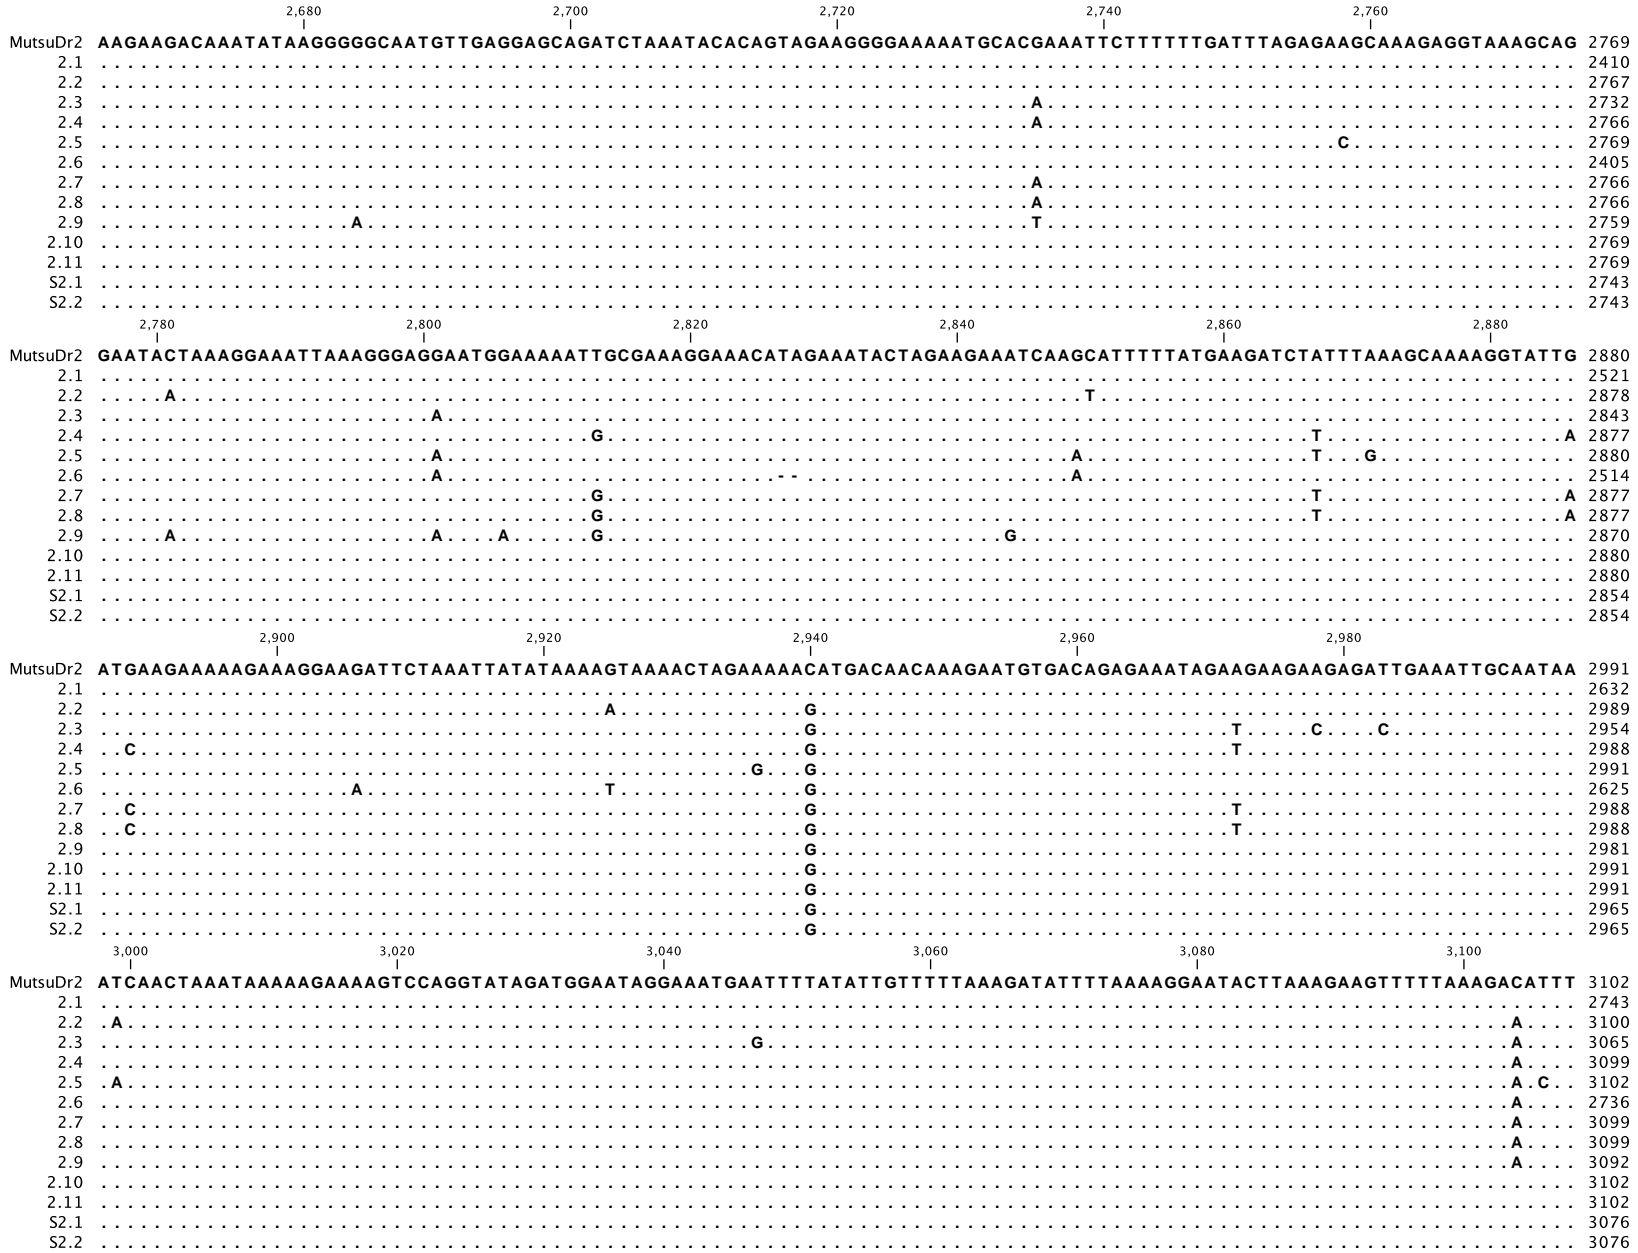

Supplemental Figure S9

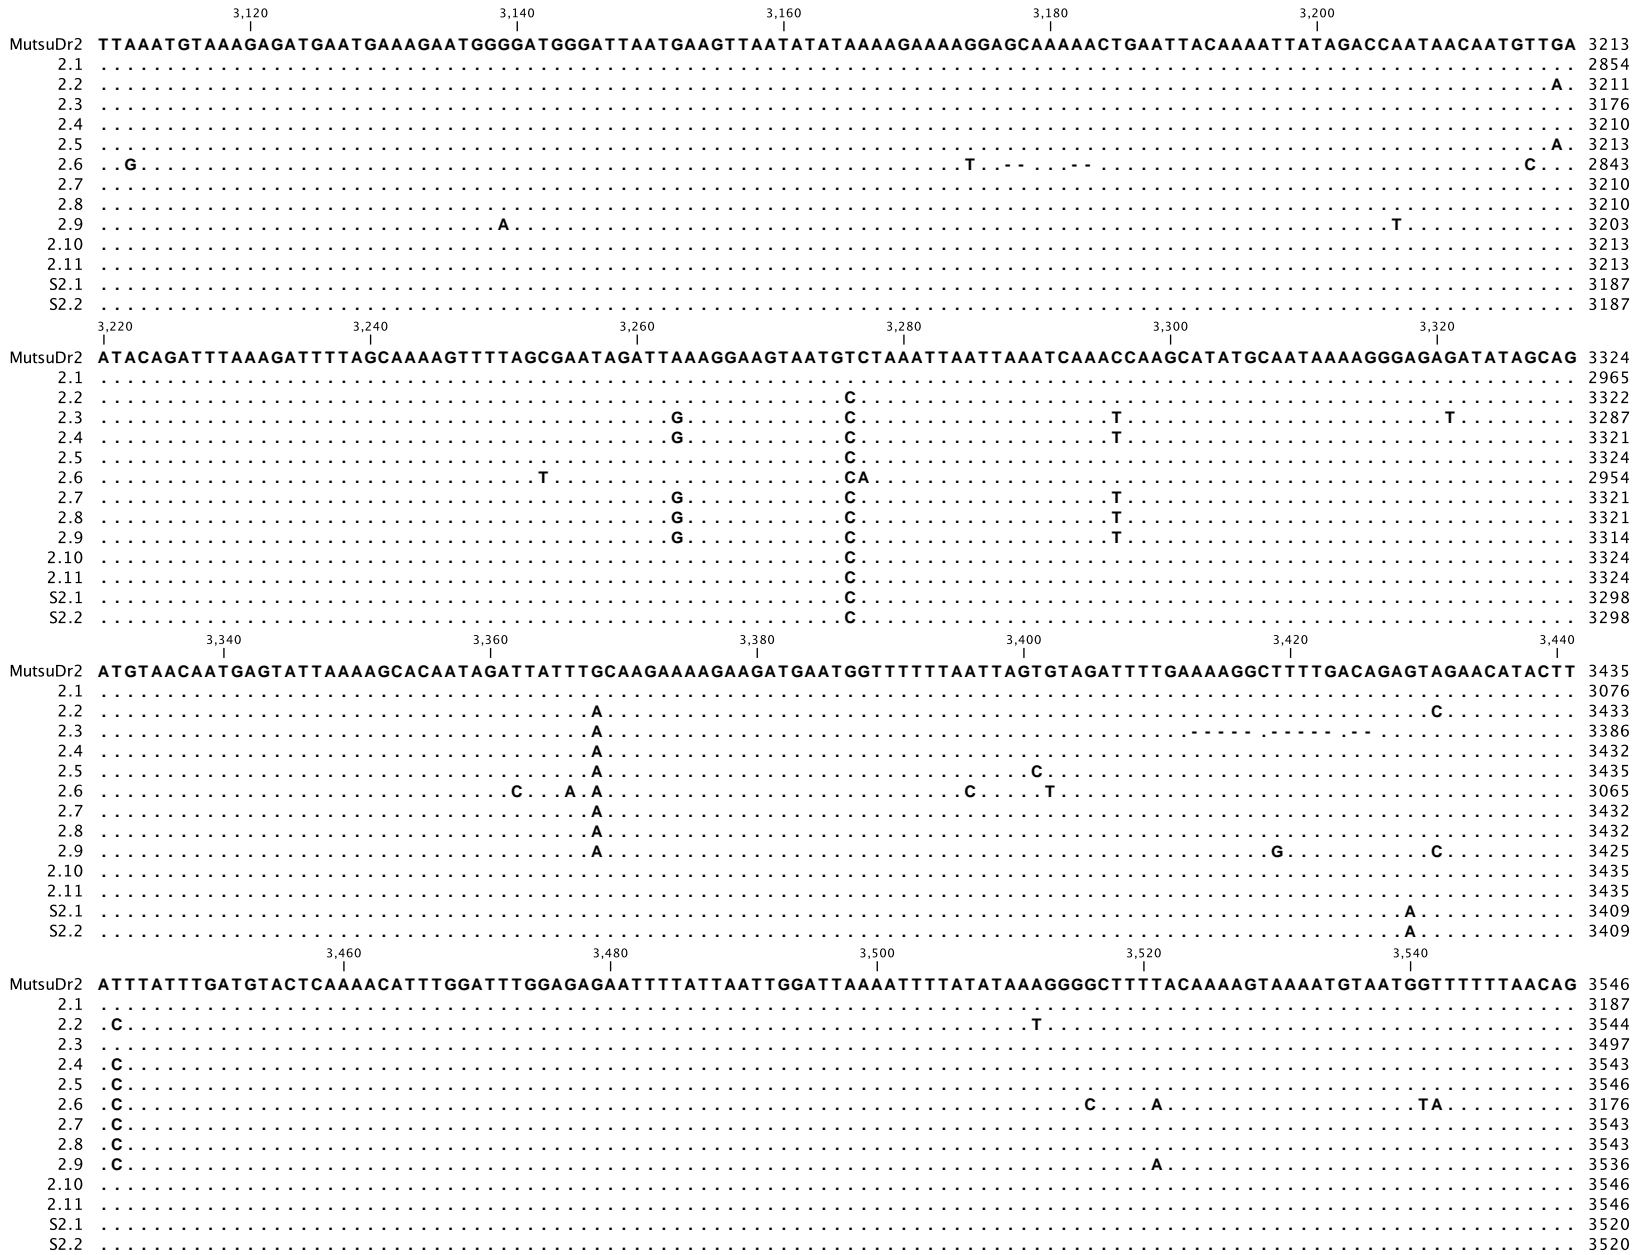

Supplemental Figure S9

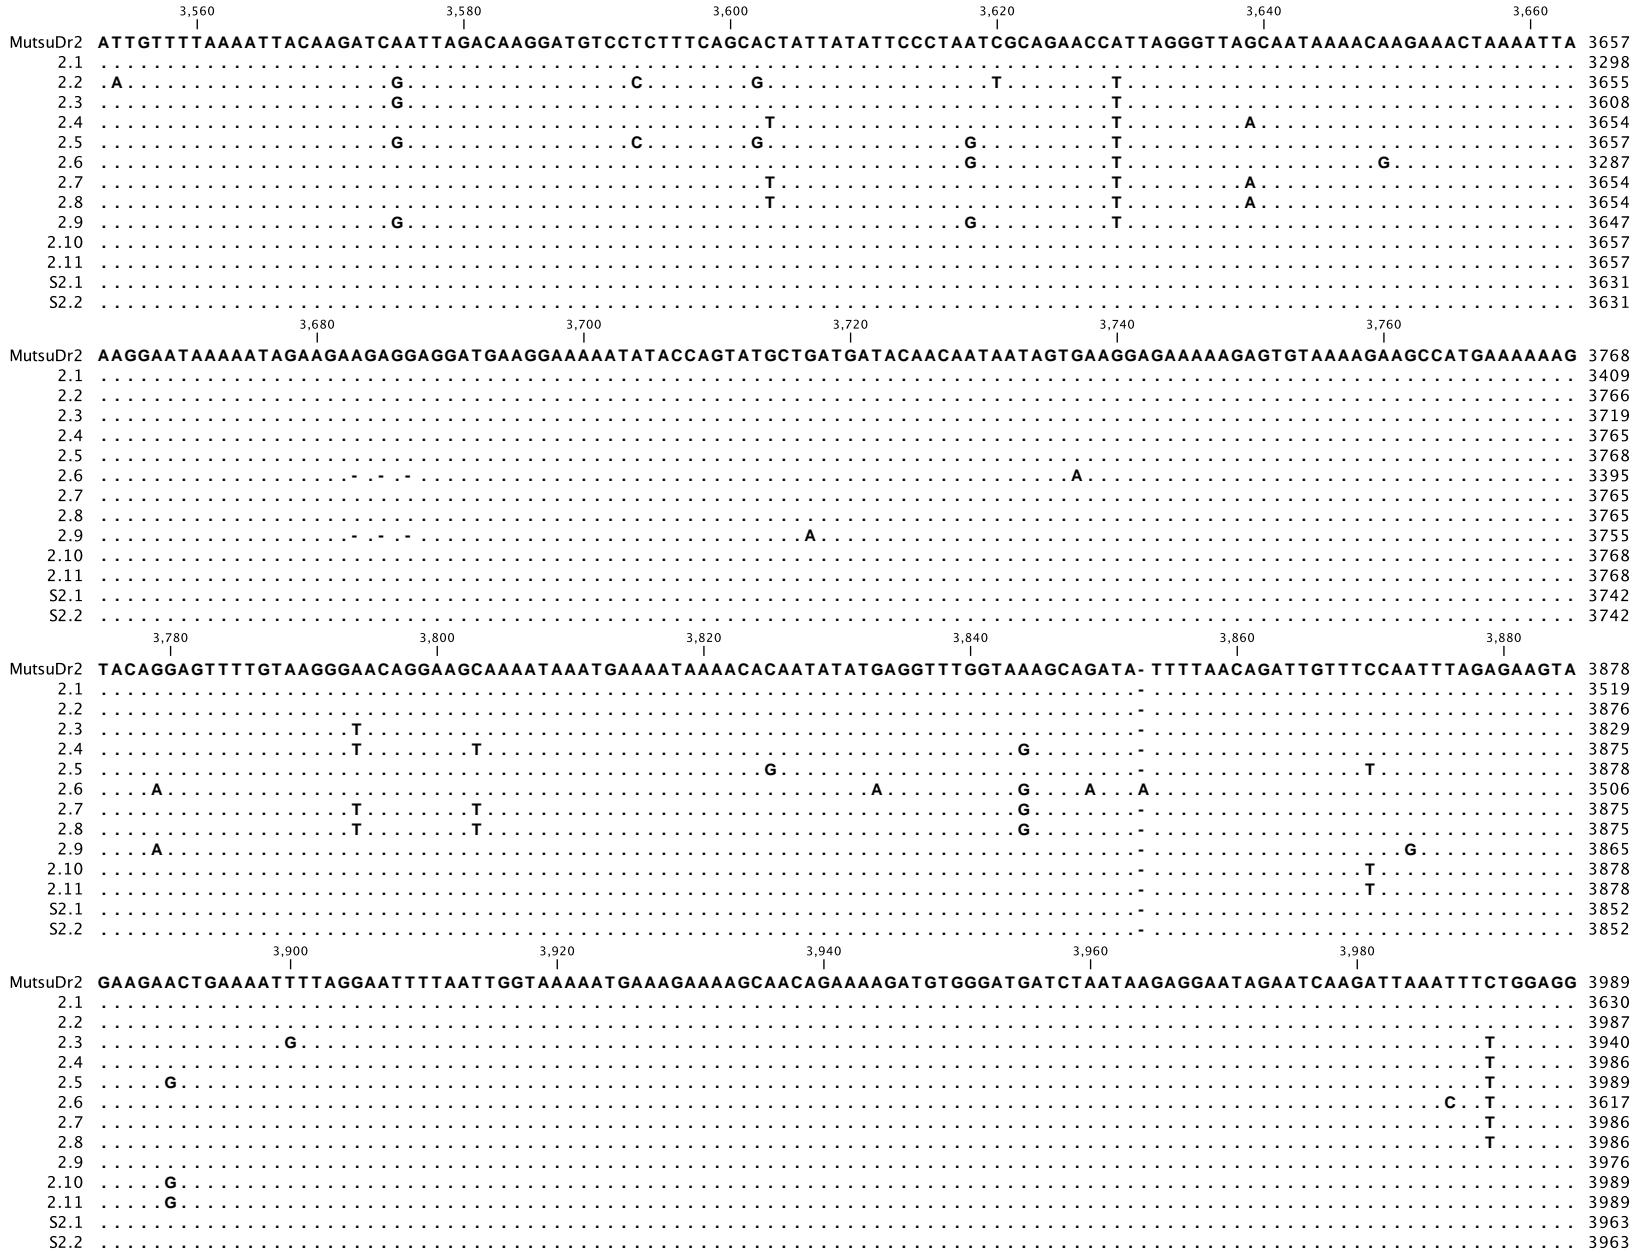

Supplemental Figure S9

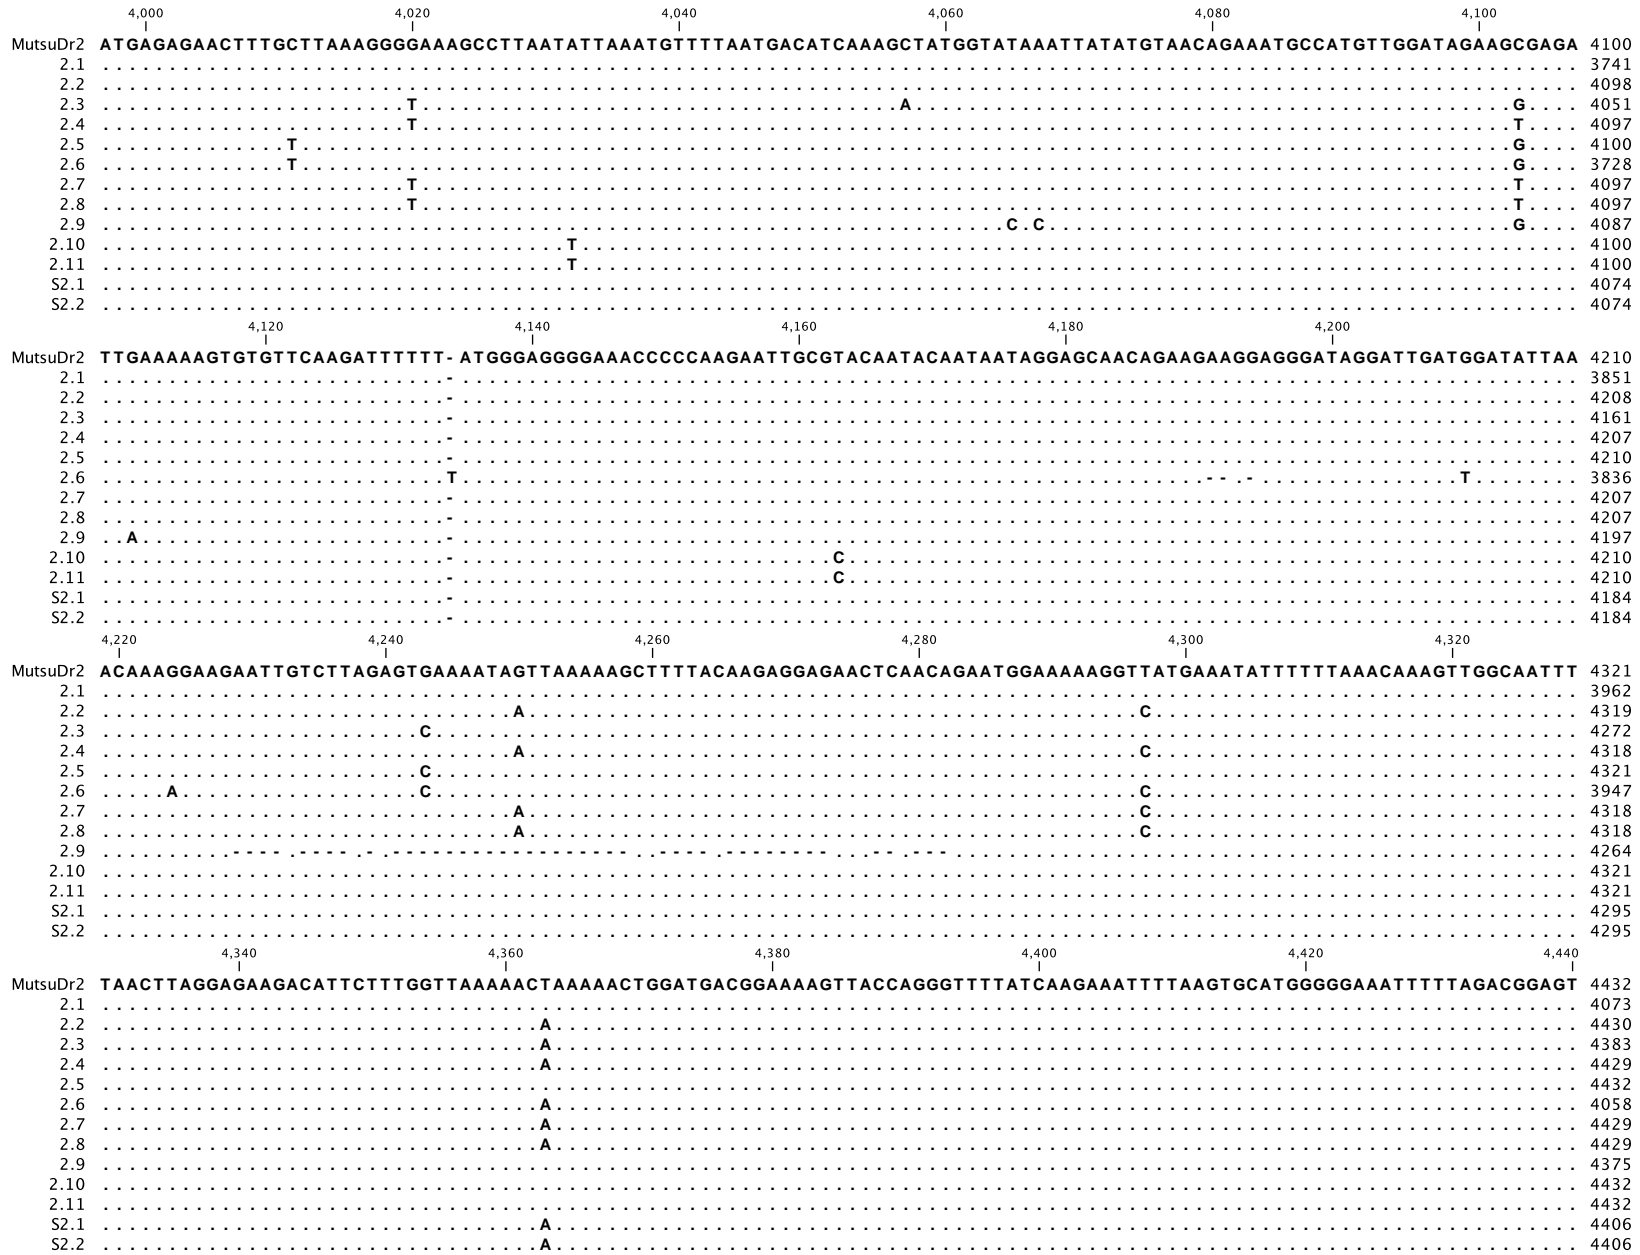



Supplemental Figure S9

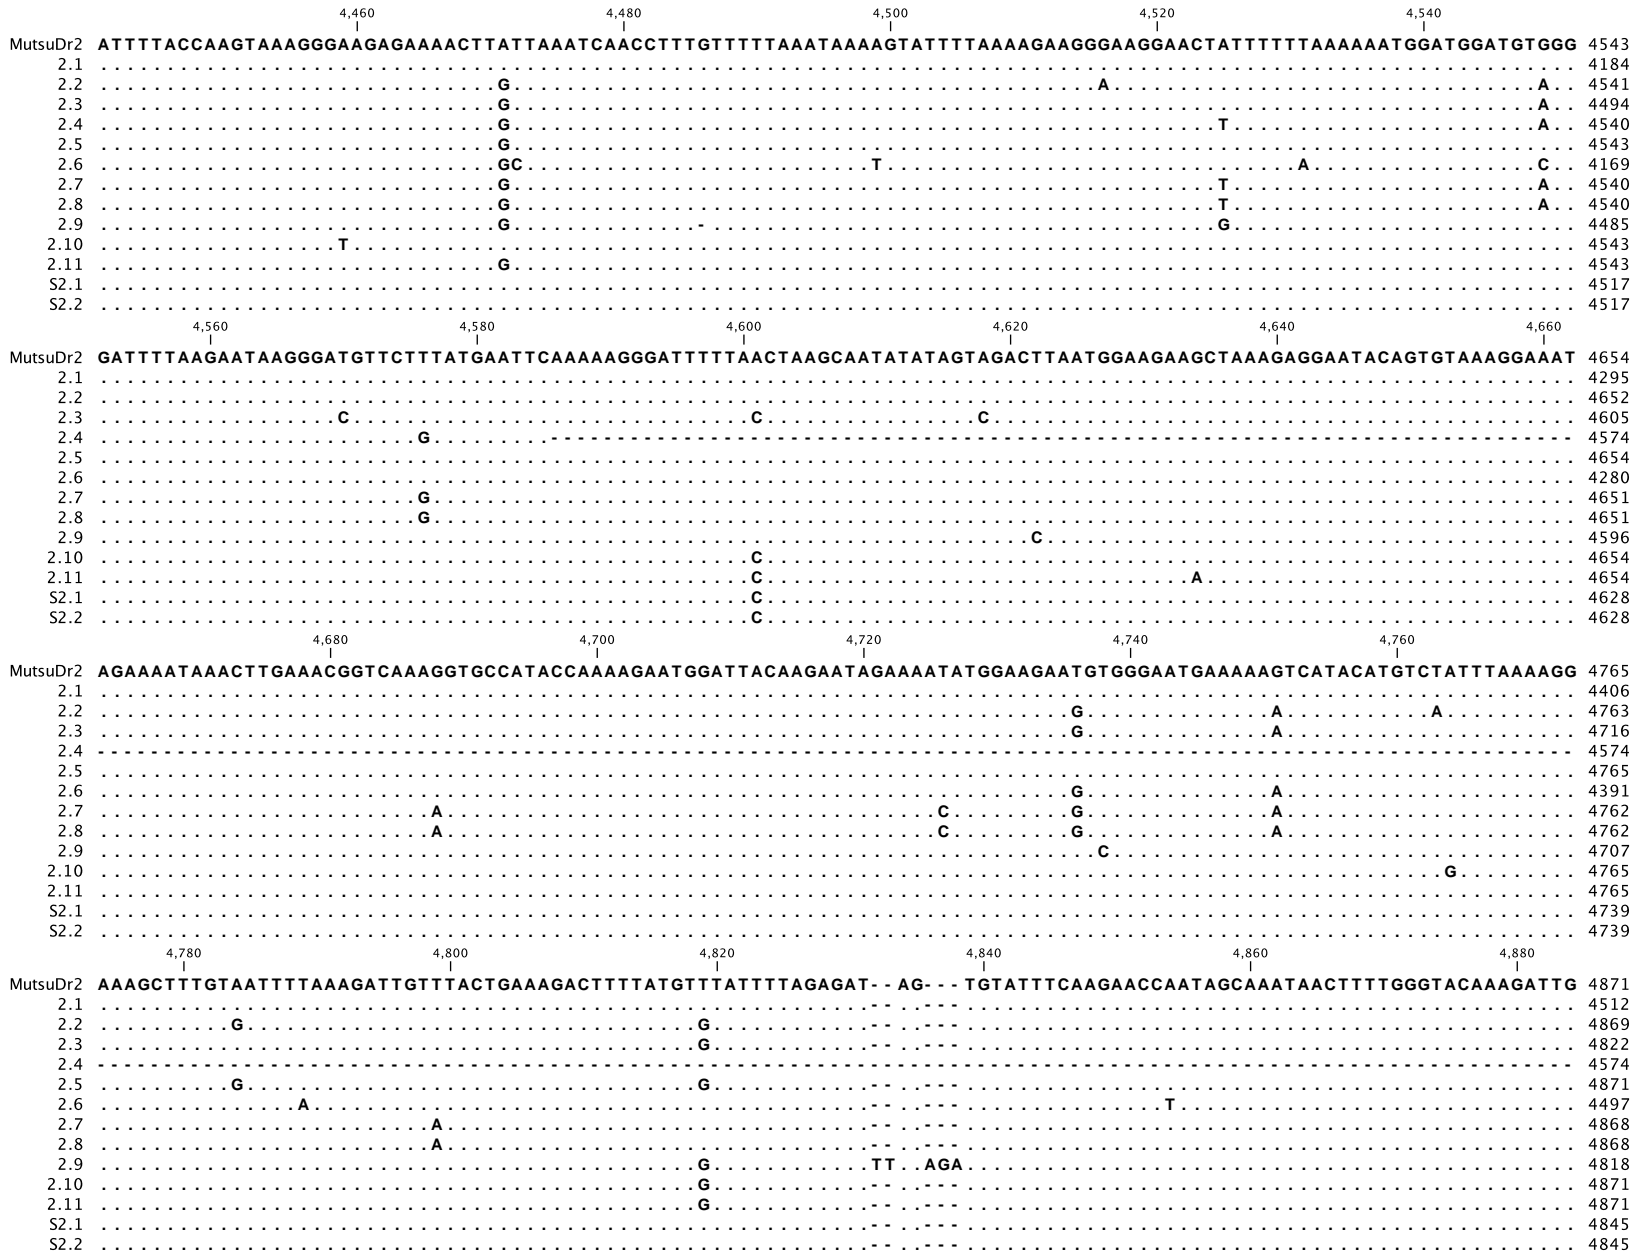

Supplemental Figure S9

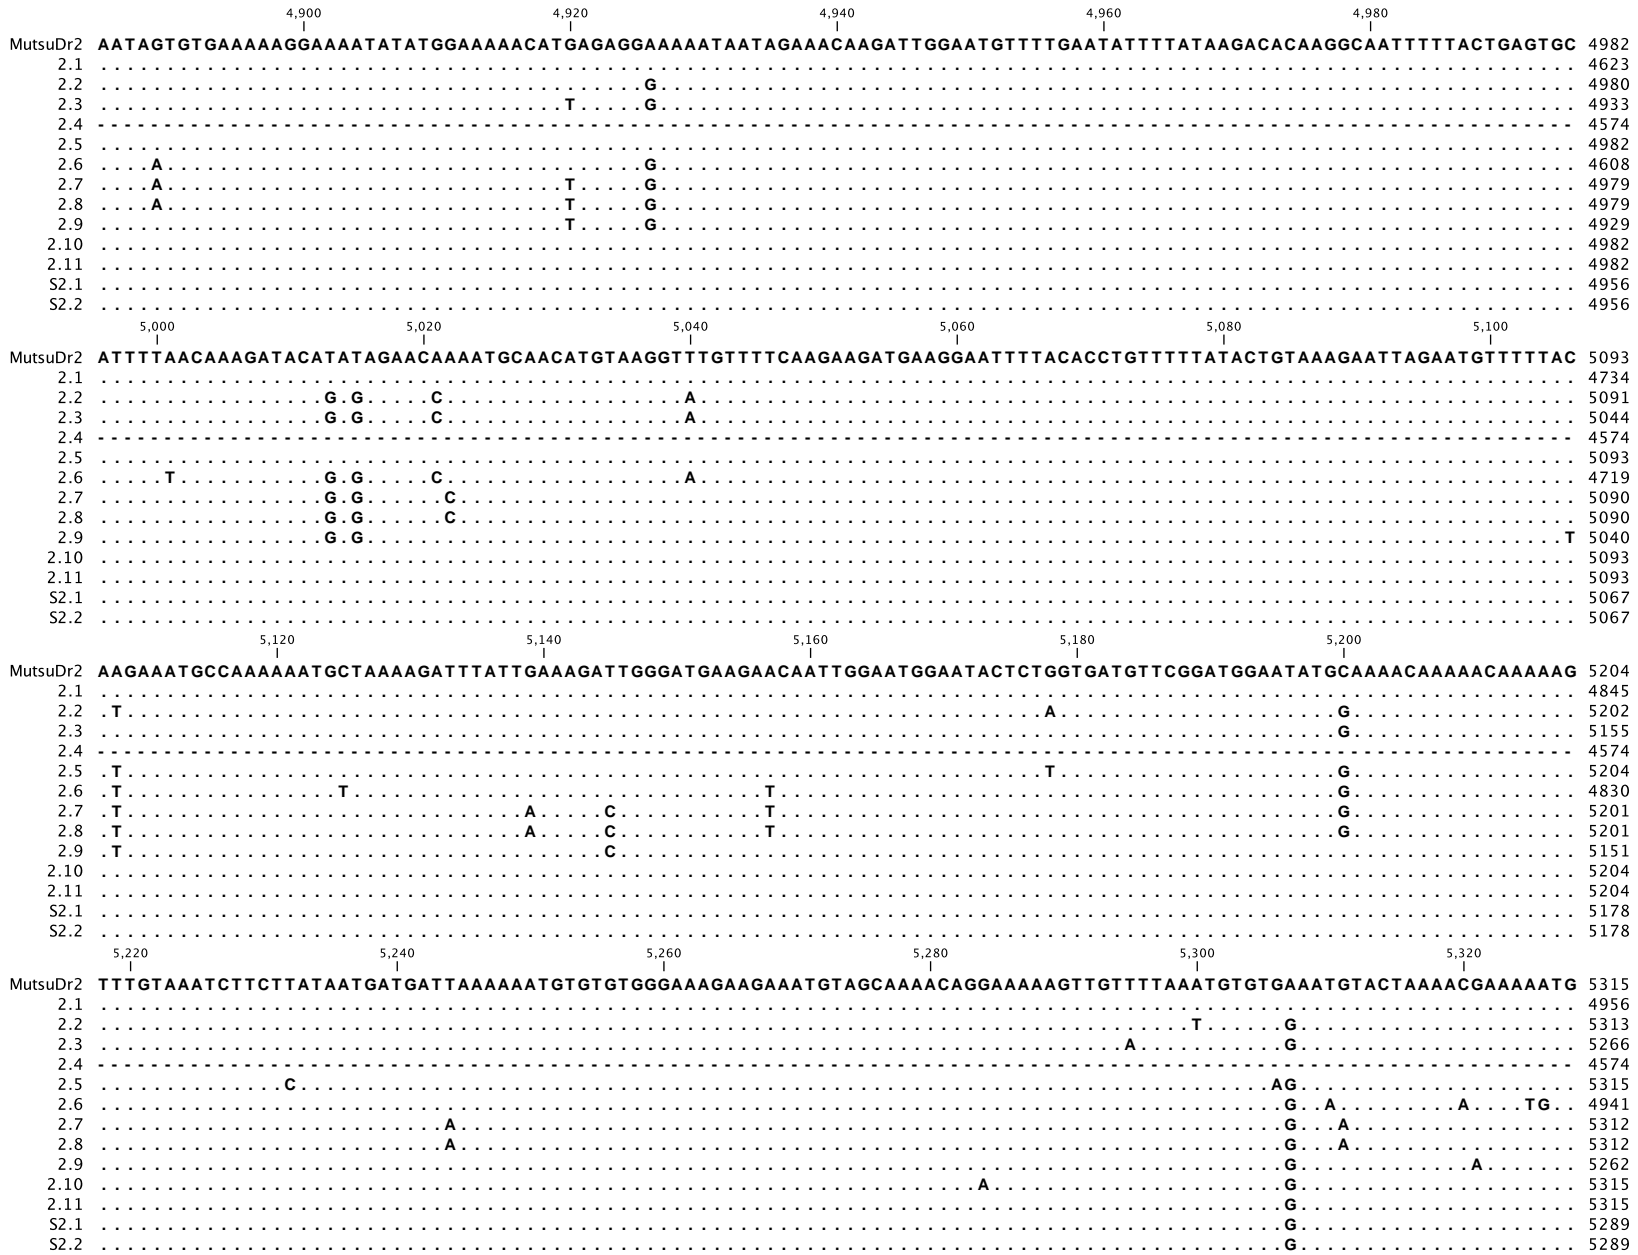

Supplemental Figure S9

|          |                                                                                                                     |                                                                                                  |                 |                                                |                  |                        |                        |                 |                 |                |                 |                 |                    |                 |                |      |
|----------|---------------------------------------------------------------------------------------------------------------------|--------------------------------------------------------------------------------------------------|-----------------|------------------------------------------------|------------------|------------------------|------------------------|-----------------|-----------------|----------------|-----------------|-----------------|--------------------|-----------------|----------------|------|
|          |                                                                                                                     | 5,340                                                                                            |                 | 5,360                                          |                  | 5,380                  |                        | 5,400           |                 | 5,420          |                 |                 |                    |                 |                |      |
| MutsuDr2 | <b>GAAAGATACATAGAAAGACTGTA</b>                                                                                      | <b>CTGCTATTTTAAAGGAGAAGATATGTTACCAAGCTTTTATGATGTGTTTAAATGATGAAGTGTATAATGTTTTAAATGGTTTAAAGTGG</b> |                 |                                                |                  |                        |                        |                 |                 |                | 5426            |                 |                    |                 |                |      |
| 2.1      | .....                                                                                                               | .....                                                                                            | .....           | .....                                          | .....            | .....                  | .....                  | .....           | .....           | .....          | 5067            |                 |                    |                 |                |      |
| 2.2      | .....                                                                                                               | <b>T</b> .....                                                                                   | .....           | <b>G</b> .....                                 | .....            | <b>C</b> .....         | .....                  | <b>A</b> .....  | .....           | <b>A</b> ..... | <b>T</b> .....  | 5424            |                    |                 |                |      |
| 2.3      | .....                                                                                                               | .....                                                                                            | .....           | <b>G</b> .....                                 | .....            | .....                  | .....                  | <b>A</b> .....  | .....           | .....          | .....           | 5377            |                    |                 |                |      |
| 2.4      | .....                                                                                                               | .....                                                                                            | .....           | .....                                          | .....            | .....                  | .....                  | .....           | .....           | .....          | .....           | 4574            |                    |                 |                |      |
| 2.5      | .....                                                                                                               | .....                                                                                            | <b>G</b> .....  | .....                                          | .....            | <b>C</b> .....         | .....                  | .....           | .....           | <b>G</b> ..... | .....           | 5426            |                    |                 |                |      |
| 2.6      | .....                                                                                                               | <b>A</b> .....                                                                                   | <b>A</b> .....  | <b>T</b> .....                                 | <b>G</b> .....   | <b>C</b> .....         | .....                  | .....           | .....           | .....          | <b>G</b> .....  | 5052            |                    |                 |                |      |
| 2.7      | .....                                                                                                               | <b>A</b> .....                                                                                   | <b>A</b> .....  | <b>T</b> .....                                 | <b>G</b> .....   | .....                  | <b>T</b> .....         | .....           | <b>A</b> .....  | .....          | .....           | 5423            |                    |                 |                |      |
| 2.8      | .....                                                                                                               | <b>A</b> .....                                                                                   | <b>T</b> .....  | <b>G</b> .....                                 | .....            | <b>T</b> .....         | .....                  | <b>A</b> .....  | .....           | .....          | .....           | 5423            |                    |                 |                |      |
| 2.9      | .....                                                                                                               | .....                                                                                            | .....           | <b>G</b> .....                                 | .....            | .....                  | .....                  | .....           | .....           | .....          | .....           | 5373            |                    |                 |                |      |
| 2.10     | .....                                                                                                               | .....                                                                                            | .....           | .....                                          | .....            | .....                  | .....                  | .....           | .....           | .....          | .....           | 5426            |                    |                 |                |      |
| 2.11     | .....                                                                                                               | .....                                                                                            | .....           | .....                                          | .....            | .....                  | .....                  | .....           | .....           | .....          | .....           | 5426            |                    |                 |                |      |
| S2.1     | .....                                                                                                               | .....                                                                                            | .....           | .....                                          | .....            | .....                  | .....                  | .....           | .....           | .....          | .....           | 5400            |                    |                 |                |      |
| S2.2     | .....                                                                                                               | .....                                                                                            | .....           | .....                                          | .....            | .....                  | .....                  | .....           | .....           | .....          | .....           | 5400            |                    |                 |                |      |
|          | 5,440                                                                                                               |                                                                                                  | 5,460           |                                                | 5,480            |                        | 5,500                  |                 | 5,520           |                | 5,540           |                 |                    |                 |                |      |
| MutsuDr2 | <b>AAATGCCCAAAGAGGATGTTATGTTATGAAGAATGTTGATTTAATGTAATTGTTTTGTGAAATTTCTTGAAGTATTTAAATGTTAATGTAATGTGATTAATTTTAATA</b> |                                                                                                  |                 |                                                |                  |                        |                        |                 |                 |                | 5537            |                 |                    |                 |                |      |
| 2.1      | .....                                                                                                               | .....                                                                                            | .....           | .....                                          | .....            | .....                  | .....                  | .....           | .....           | .....          | .....           | 5178            |                    |                 |                |      |
| 2.2      | .....                                                                                                               | .....                                                                                            | <b>T</b> .....  | <b>GT</b> .....                                | <b>T</b> .....   | <b>T</b> .....         | .....                  | .....           | .....           | <b>G</b> ..... | <b>TT</b> ..... | <b>G</b> .....  | <b>AT</b> .....    | 5535            |                |      |
| 2.3      | .....                                                                                                               | .....                                                                                            | <b>T</b> .....  | .....                                          | <b>T</b> .....   | .....                  | <b>T</b> .....         | .....           | <b>T</b> .....  | .....          | <b>G</b> .....  | <b>TT</b> ..... | <b>G</b> .....     | <b>T</b> .....  | 5488           |      |
| 2.4      | .....                                                                                                               | .....                                                                                            | .....           | .....                                          | .....            | .....                  | .....                  | .....           | .....           | .....          | .....           | .....           | .....              | 4574            |                |      |
| 2.5      | .....                                                                                                               | .....                                                                                            | <b>CT</b> ..... | .....                                          | <b>T</b> .....   | <b>T</b> .....         | <b>T</b> .....         | .....           | .....           | <b>A</b> ..... | <b>TT</b> ..... | <b>G</b> .....  | .....              | 5537            |                |      |
| 2.6      | .....                                                                                                               | .....                                                                                            | <b>T</b> .....  | .....                                          | <b>C</b> .....   | <b>T</b> .....         | <b>T</b> .....         | <b>A</b> .....  | <b>G</b> .....  | .....          | <b>G</b> .....  | <b>TT</b> ..... | <b>G</b> .....     | <b>AT</b> ..... | 5163           |      |
| 2.7      | .....                                                                                                               | .....                                                                                            | <b>T</b> .....  | .....                                          | <b>T</b> .....   | <b>GT</b> .....        | <b>G</b> .....         | <b>G</b> .....  | <b>G</b> .....  | <b>G</b> ..... | <b>AA</b> ..... | <b>T</b> .....  | <b>TTGAA</b> ..... | <b>A</b> .....  | <b>G</b> ..... | 5533 |
| 2.8      | .....                                                                                                               | .....                                                                                            | <b>T</b> .....  | .....                                          | <b>T</b> .....   | <b>GT</b> .....        | <b>G</b> .....         | <b>G</b> .....  | <b>G</b> .....  | <b>G</b> ..... | <b>AA</b> ..... | <b>T</b> .....  | <b>TTGAA</b> ..... | <b>A</b> .....  | <b>G</b> ..... | 5533 |
| 2.9      | .....                                                                                                               | .....                                                                                            | .....           | .....                                          | .....            | .....                  | .....                  | .....           | .....           | .....          | .....           | <b>TT</b> ..... | .....              | .....           | .....          | 5479 |
| 2.10     | .....                                                                                                               | .....                                                                                            | .....           | .....                                          | .....            | .....                  | .....                  | .....           | .....           | .....          | .....           | <b>TT</b> ..... | <b>AA</b> .....    | <b>A</b> .....  | .....          | 5537 |
| 2.11     | .....                                                                                                               | .....                                                                                            | .....           | .....                                          | .....            | .....                  | .....                  | .....           | .....           | .....          | .....           | <b>TT</b> ..... | .....              | .....           | .....          | 5537 |
| S2.1     | .....                                                                                                               | .....                                                                                            | .....           | .....                                          | <b>CAA</b> ..... | <b>AAAAAAAAA</b> ..... | <b>AAAAAAAAA</b> ..... | <b>AA</b> ..... | <b>AA</b> ..... | .....          | .....           | .....           | .....              | .....           | .....          | 5478 |
| S2.2     | .....                                                                                                               | .....                                                                                            | .....           | .....                                          | <b>CAA</b> ..... | <b>AAAAAAAAA</b> ..... | <b>AAAAAAAAA</b> ..... | <b>AA</b> ..... | <b>AA</b> ..... | .....          | .....           | .....           | .....              | .....           | .....          | 5478 |
|          | 5,560                                                                                                               |                                                                                                  | 5,580           |                                                |                  |                        |                        |                 |                 |                |                 |                 |                    |                 |                |      |
| MutsuDr2 | <b>AAAAATAAAAAA</b>                                                                                                 |                                                                                                  |                 |                                                |                  |                        |                        |                 |                 |                | 5551            |                 |                    |                 |                |      |
| 2.1      | .....                                                                                                               | .....                                                                                            | .....           | .....                                          | .....            | .....                  | .....                  | .....           | .....           | .....          | .....           | 5192            |                    |                 |                |      |
| 2.2      | .....                                                                                                               | <b>A</b> .....                                                                                   | .....           | <b>AAAA</b> .....                              | .....            | .....                  | .....                  | .....           | .....           | .....          | .....           | 5553            |                    |                 |                |      |
| 2.3      | .....                                                                                                               | <b>A</b> .....                                                                                   | .....           | <b>AAAAAAAAAAAA</b> .....                      | .....            | .....                  | .....                  | .....           | .....           | .....          | .....           | 5514            |                    |                 |                |      |
| 2.4      | .....                                                                                                               | .....                                                                                            | .....           | .....                                          | .....            | .....                  | .....                  | .....           | .....           | .....          | .....           | 4574            |                    |                 |                |      |
| 2.5      | .....                                                                                                               | <b>A</b> .....                                                                                   | .....           | <b>AAA</b> .....                               | .....            | .....                  | .....                  | .....           | .....           | .....          | .....           | 5554            |                    |                 |                |      |
| 2.6      | .....                                                                                                               | <b>CA</b> .....                                                                                  | .....           | .....                                          | .....            | .....                  | .....                  | .....           | .....           | .....          | .....           | 5175            |                    |                 |                |      |
| 2.7      | .....                                                                                                               | <b>A</b> .....                                                                                   | .....           | <b>GAAAAAAAAAAAAAAAAAAAAAAAAAAAAAAAA</b> ..... | .....            | .....                  | .....                  | .....           | .....           | .....          | .....           | 5578            |                    |                 |                |      |
| 2.8      | .....                                                                                                               | <b>A</b> .....                                                                                   | .....           | <b>GAAAAAAAAAAAAAAAAAAAAAAAAAAAAAAAA</b> ..... | .....            | .....                  | .....                  | .....           | .....           | .....          | .....           | 5578            |                    |                 |                |      |
| 2.9      | .....                                                                                                               | <b>A</b> .....                                                                                   | .....           | <b>AAAAAA</b> .....                            | .....            | .....                  | .....                  | .....           | .....           | .....          | .....           | 5499            |                    |                 |                |      |
| 2.10     | .....                                                                                                               | <b>A</b> .....                                                                                   | .....           | <b>AAAA</b> .....                              | .....            | .....                  | .....                  | .....           | .....           | .....          | .....           | 5555            |                    |                 |                |      |
| 2.11     | .....                                                                                                               | <b>A</b> .....                                                                                   | .....           | <b>AAAAAA</b> .....                            | .....            | .....                  | .....                  | .....           | .....           | .....          | .....           | 5557            |                    |                 |                |      |
| S2.1     | .....                                                                                                               | .....                                                                                            | .....           | <b>AAAAAA</b> .....                            | .....            | .....                  | .....                  | .....           | .....           | .....          | .....           | 5478            |                    |                 |                |      |
| S2.2     | .....                                                                                                               | .....                                                                                            | .....           | .....                                          | .....            | .....                  | .....                  | .....           | .....           | .....          | .....           | 5478            |                    |                 |                |      |

Supplemental Figure S9

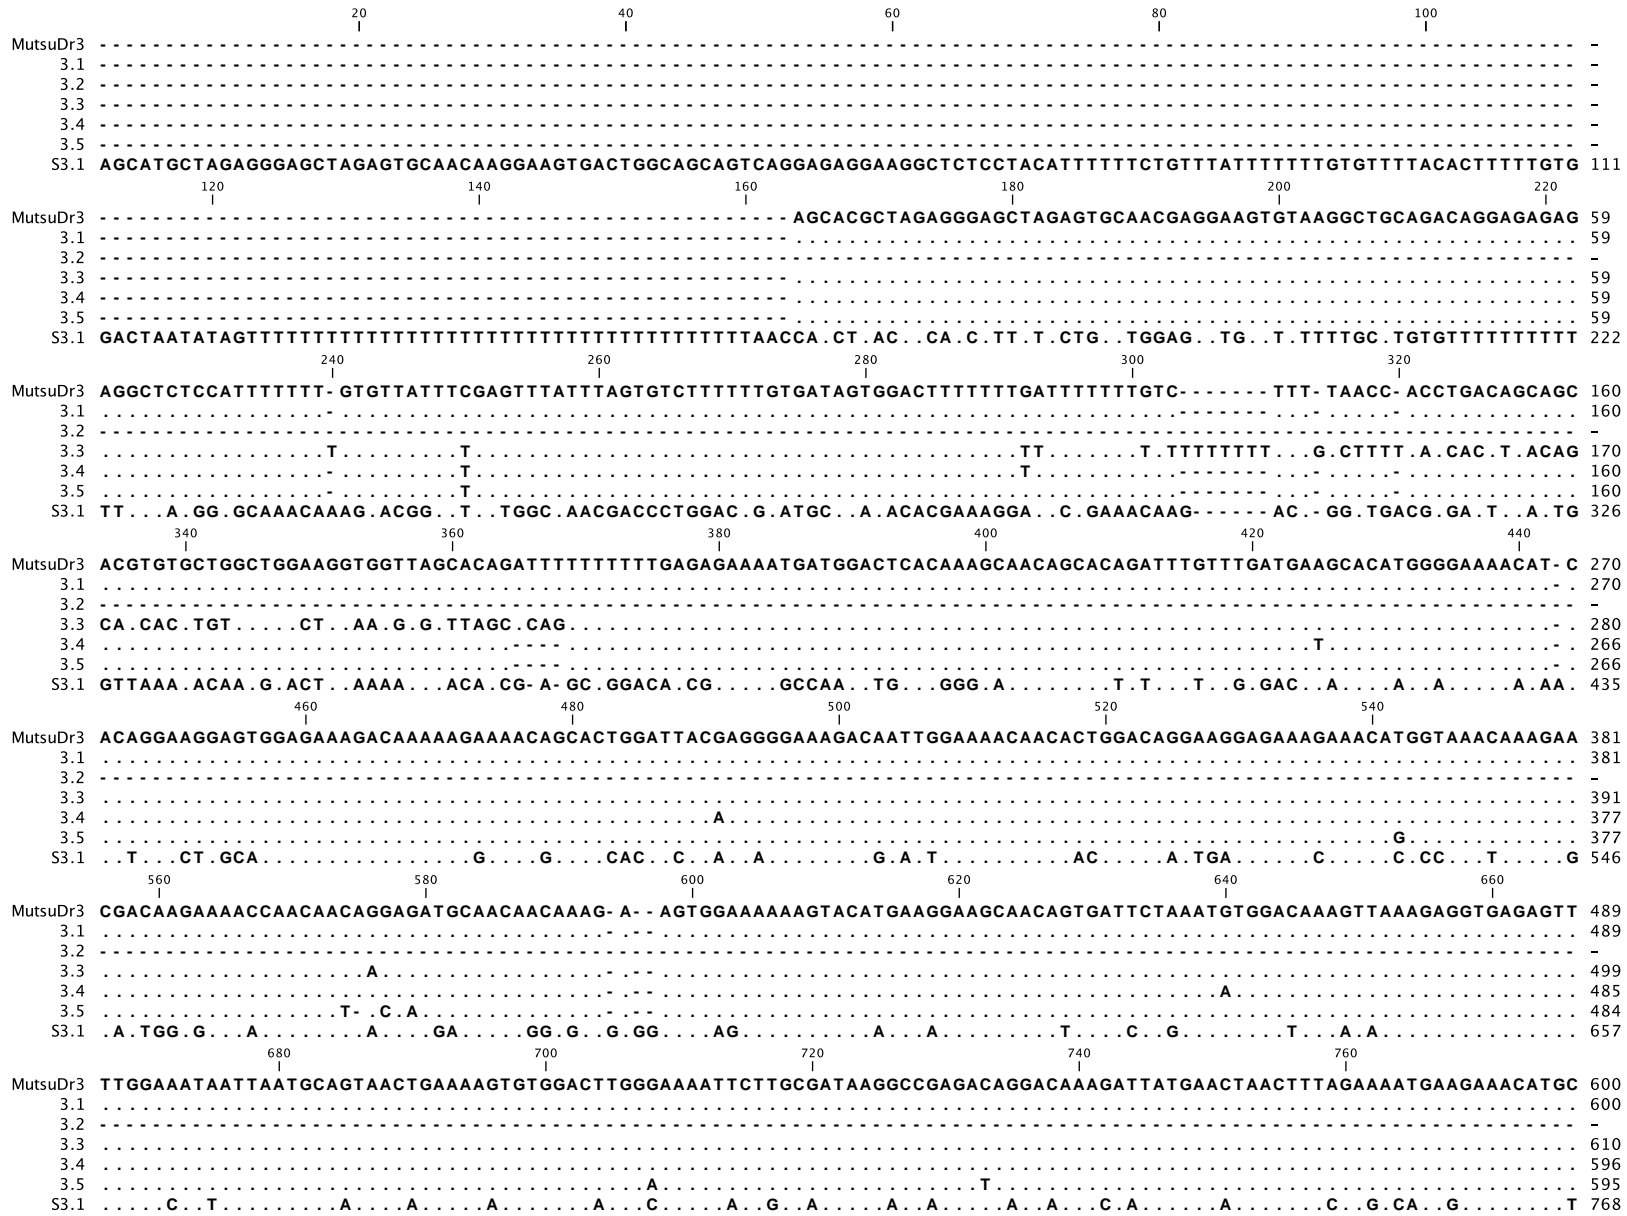

Supplemental Figure S9

|          |                                                                                                                      |       |       |       |       |       |                                           |
|----------|----------------------------------------------------------------------------------------------------------------------|-------|-------|-------|-------|-------|-------------------------------------------|
|          | 780                                                                                                                  | 800   | 820   | 840   | 860   | 880   |                                           |
| MutsuDr3 | GATAAAGCTGATGGATGGACTAATAATAAAAGGAGAAACCTGTGAAGTGAAAATGCTACAAAATAGAGACTACGTGGTTTCCTTCATGCATTGCCCCGTTACCTGGATGAT      |       |       |       |       |       | 711                                       |
| 3.1      | .....                                                                                                                |       |       |       |       |       | 711                                       |
| 3.2      | .....                                                                                                                |       |       |       |       |       | -                                         |
| 3.3      | .....                                                                                                                |       |       |       |       |       | 721                                       |
| 3.4      | .....T.....                                                                                                          |       |       |       |       |       | 707                                       |
| 3.5      | .....                                                                                                                |       |       |       |       |       | 706                                       |
| S3.1     | AC                                                                                                                   | A     | T     | A     | T     | GTT   | T T A 879                                 |
|          | 900                                                                                                                  | 920   | 940   | 960   | 980   |       |                                           |
| MutsuDr3 | CAATTAATATTAGATAAATTAGAAGGCTGGGGAGTATTTCCCATAAACAAAATTTAAAAGAAGGGTATATCCGGGCACAGAAATAGAAGATGGAACCTCGATATCTCAAAGTG    |       |       |       |       |       | 822                                       |
| 3.1      | .....                                                                                                                |       |       |       |       |       | 822                                       |
| 3.2      | .....CA                                                                                                              |       |       |       |       |       | 6                                         |
| 3.3      | .....                                                                                                                |       |       |       |       |       | 832                                       |
| 3.4      | .....                                                                                                                |       |       |       |       |       | 818                                       |
| 3.5      | .....                                                                                                                |       |       |       |       |       | 817                                       |
| S3.1     | A                                                                                                                    | T     | T     | C     | G     | T     | C A T G TT C T G T G C A A C T A T CA 990 |
|          | 1,000                                                                                                                | 1,020 | 1,040 | 1,060 | 1,080 | 1,100 |                                           |
| MutsuDr3 | AGATTCCCCAGAGAAGTGATATCTCTCCCTTACAGCACAAAGACTGGAACGGCAGAAAGTTCAGCAATATTTTAGGGTGATGCACAGCCACCAGGTTAAGACTTGTAGGCTG     |       |       |       |       |       | 933                                       |
| 3.1      | .....                                                                                                                |       |       |       |       |       | 933                                       |
| 3.2      | G T A AG T C A T G AG A GAT G AT A G C                                                                               |       |       |       |       |       | 117                                       |
| 3.3      | .....                                                                                                                |       |       |       |       |       | 943                                       |
| 3.4      | .....                                                                                                                |       |       |       |       |       | 929                                       |
| 3.5      | .....                                                                                                                |       |       |       |       |       | 928                                       |
| S3.1     | G                                                                                                                    | T     | A     | AG    | T     | C     | A T G AG T A AT A G C 1101                |
|          | 1,120                                                                                                                | 1,140 | 1,160 | 1,180 | 1,200 | 1,220 |                                           |
| MutsuDr3 | TGCATGAGCCCTGACCATATGGTCAAAGATTGCCAGACTTTAAATGCCATAAATGTGAGGAAAGGGGACATTTTGCCAGAGACTGCGATGCTATTAAGTCCCCGGACTGC       |       |       |       |       |       | 1044                                      |
| 3.1      | .....                                                                                                                |       |       |       |       |       | 1044                                      |
| 3.2      | A C C T T T C G G A A G A C A C G A T                                                                                |       |       |       |       |       | 228                                       |
| 3.3      | .....                                                                                                                |       |       |       |       |       | 1054                                      |
| 3.4      | .....                                                                                                                |       |       |       |       |       | 1040                                      |
| 3.5      | .....                                                                                                                |       |       |       |       |       | 1039                                      |
| S3.1     | A                                                                                                                    | C     | C     | T     | T     | C     | G G A A G A C A C G A T T 1212            |
|          | 1,240                                                                                                                | 1,260 | 1,280 | 1,300 | 1,320 |       |                                           |
| MutsuDr3 | CAGAACTATTTAAGTAAGTGTGAATGTTGGATGGAGGAAGAGGAGGAGGAGGA - T - GAGATCCAGGTGAGTGGGCAAAATGCATGAAGGAAACAGTGAAAAGGAAAGTAAAT |       |       |       |       |       | 1152                                      |
| 3.1      | .....                                                                                                                |       |       |       |       |       | 1152                                      |
| 3.2      | TA A A T A C GG T A C G G T                                                                                          |       |       |       |       |       | 339                                       |
| 3.3      | .....                                                                                                                |       |       |       |       |       | 1162                                      |
| 3.4      | .....                                                                                                                |       |       |       |       |       | 1148                                      |
| 3.5      | .....                                                                                                                |       |       |       |       |       | 1147                                      |
| S3.1     | TA                                                                                                                   | A     | A     | T     | A     | C     | GG T A C G G T G 1323                     |
|          | 1,340                                                                                                                | 1,360 | 1,380 | 1,400 | 1,420 | 1,440 |                                           |
| MutsuDr3 | GAAGAGGAACAAACAACGACACAAACAATACAAACTACAACAGAGGAAATAACATTGAAGGAGGAGAATGCAAAAAAGAAAAGGAAAAAGAAAACAGAAACAGACAGTCAA      |       |       |       |       |       | 1263                                      |
| 3.1      | .....                                                                                                                |       |       |       |       |       | 1263                                      |
| 3.2      | GA A AG T GT CA C T G C GG G T                                                                                       |       |       |       |       |       | 441                                       |
| 3.3      | .....                                                                                                                |       |       |       |       |       | 1273                                      |
| 3.4      | .....                                                                                                                |       |       |       |       |       | 1259                                      |
| 3.5      | .....                                                                                                                |       |       |       |       |       | 1258                                      |
| S3.1     | TA                                                                                                                   | A     | AG    | TG    | GT    | CA    | C T G C GG G T G 1425                     |
|          | 1,460                                                                                                                | 1,480 | 1,500 | 1,520 | 1,540 |       |                                           |
| MutsuDr3 | CAAATAGAGCATGAAGAGGAGGTAGCATGGACACCAATGGACATAACTTCTAGCTTCAAAAACGTTTTGGATGTAATTGAAAAAGAGGATCTTAAAGAACAAGCAAGGGA       |       |       |       |       |       | 1374                                      |
| 3.1      | .....                                                                                                                |       |       |       |       |       | 1374                                      |
| 3.2      | C G CT T C C AC C T T G A C CA T T T A CT A A                                                                        |       |       |       |       |       | 552                                       |
| 3.3      | .....                                                                                                                |       |       |       |       |       | 1384                                      |
| 3.4      | .....                                                                                                                |       |       |       |       |       | 1370                                      |
| 3.5      | .....                                                                                                                |       |       |       |       |       | 1369                                      |
| S3.1     | C                                                                                                                    | G     | CT    | T     | C     | C     | AC C T T G A C CA T T A T T A CT A A 1536 |

Supplemental Figure S9

|          |                                                                                                                                                                                                                                           |       |       |       |       |       |      |
|----------|-------------------------------------------------------------------------------------------------------------------------------------------------------------------------------------------------------------------------------------------|-------|-------|-------|-------|-------|------|
|          | 1,560                                                                                                                                                                                                                                     | 1,580 | 1,600 | 1,620 | 1,640 | 1,660 |      |
| MutsuDr3 | ACAGACAGAGAGACTGGAAAAATGAGGAGGAAGTAGAAAAAGACAACTTGAGAAAAGACAACAAGACGATCGGCCAAAAGTTTTATCAAAATTAGAACTGCAAGAAAA                                                                                                                              |       |       |       |       |       | 1485 |
| 3.1      | .....                                                                                                                                                                                                                                     |       |       |       |       |       | 1485 |
| 3.2      | . . . . . A . . . . . A . . . . . AG . . . . . A T . . . . . ACT . . . . . G . . . . . TT . . . . . TA . . . . . G . . . . . G . . . . . A . . . . . CG . . . . . T . . . . . A . . . . . G . . . . . A . . . . . C . . . . . G . . . . . |       |       |       |       |       | 663  |
| 3.3      | . . . . . G . . . . .                                                                                                                                                                                                                     |       |       |       |       |       | 1495 |
| 3.4      | . . . . . G . . . . .                                                                                                                                                                                                                     |       |       |       |       |       | 1481 |
| 3.5      | . . . . . G . . . . .                                                                                                                                                                                                                     |       |       |       |       |       | 1480 |
| S3.1     | . . . . . A . . . . . A . . . . . AG . . . . . A T . . . . . ACT . . . . . G . . . . . TT . . . . . A . . . . . G . . . . . G . . . . . A . . . . . CG . . . . . T . . . . . A . . . . . G . . . . . A . . . . . C . . . . . G . . . . .  |       |       |       |       |       | 1647 |
|          | 1,680                                                                                                                                                                                                                                     | 1,700 | 1,720 | 1,740 | 1,760 |       |      |
| MutsuDr3 | AAGGGTTTGAAAAAAGGACAACACTGAAAAGCCACAACAGATATGATTCTTTGAGAGGTTTGGGAGAAGAAGAGGACTAAGATGACGGTTTTTATTTCTTTTCTTTCTTTT                                                                                                                           |       |       |       |       |       | 1596 |
| 3.1      | .....                                                                                                                                                                                                                                     |       |       |       |       |       | 1596 |
| 3.2      | . . . . . A . . . . . T . . . . . T . . . . . T . . . . . TC . . . . . T . . . . . G . . . . . T . . . . . GA . . . . . CC . . . . . A . . . . . CT . . . . . AGG . . . . . T . . . . .                                                   |       |       |       |       |       | 774  |
| 3.3      | .....                                                                                                                                                                                                                                     |       |       |       |       |       | 1606 |
| 3.4      | .....                                                                                                                                                                                                                                     |       |       |       |       |       | 1592 |
| 3.5      | .....                                                                                                                                                                                                                                     |       |       |       |       |       | 1591 |
| S3.1     | . . . . . A . . . . . T . . . . . T . . . . . T . . . . . TC . . . . . T . . . . . G . . . . . T . . . . . GA . . . . . CC . . . . . A . . . . . CT . . . . . AGG . . . . . T . . . . .                                                   |       |       |       |       |       | 1755 |
|          | 1,780                                                                                                                                                                                                                                     | 1,800 | 1,820 | 1,840 | 1,860 | 1,880 |      |
| MutsuDr3 | AATGGTTTTAAATTGCGTGTCTTTAATGCAAGAGGTTAATGGACTTAAGAAAATTTAAGAATGTAAGGAAAAATGTAAAAGAGAAGAAATAATTATTTTACAAGAAAC                                                                                                                              |       |       |       |       |       | 1707 |
| 3.1      | .....                                                                                                                                                                                                                                     |       |       |       |       |       | 1707 |
| 3.2      | . . . . . T . . . . . T . . . . . CC . . . . . A . . . . .                                                                                                                                                                                |       |       |       |       |       | 885  |
| 3.3      | .....                                                                                                                                                                                                                                     |       |       |       |       |       | 1717 |
| 3.4      | . . . . . T . . . . .                                                                                                                                                                                                                     |       |       |       |       |       | 1703 |
| 3.5      | .....                                                                                                                                                                                                                                     |       |       |       |       |       | 1702 |
| S3.1     | . . . . . T . . . . . T . . . . . CC . . . . . A . . . . .                                                                                                                                                                                |       |       |       |       |       | 1866 |
|          | 1,900                                                                                                                                                                                                                                     | 1,920 | 1,940 | 1,960 | 1,980 |       |      |
| MutsuDr3 | AAATTGGAAAAATGAGGTGATGGACATATATAAAAAA- GAATGGGATGGGGACTTTTATTATAGTAATGGAGATACGAAAGCTGGGAGAGGAGTAGCAATTTTATAAAGA                                                                                                                           |       |       |       |       |       | 1817 |
| 3.1      | .....                                                                                                                                                                                                                                     |       |       |       |       |       | 1817 |
| 3.2      | . . . . . T . . . . . A . . . . . G . . . . .                                                                                                                                                                                             |       |       |       |       |       | 995  |
| 3.3      | .....                                                                                                                                                                                                                                     |       |       |       |       |       | 1827 |
| 3.4      | .....                                                                                                                                                                                                                                     |       |       |       |       |       | 1813 |
| 3.5      | . . . . . T . . . . .                                                                                                                                                                                                                     |       |       |       |       |       | 1812 |
| S3.1     | . . . . . T . . . . . G . . . . . A . . . . .                                                                                                                                                                                             |       |       |       |       |       | 1977 |
|          | 2,000                                                                                                                                                                                                                                     | 2,020 | 2,040 | 2,060 | 2,080 | 2,100 |      |
| MutsuDr3 | AGAATGCACTGCAAATGAGTAAAGTAATATATAAAGACAAACAAGGAAAATGTATGATATTAGAAATAAAATATGAAGGGAAAGATATTATTTTAGTTAATGTGCATGCAC                                                                                                                           |       |       |       |       |       | 1928 |
| 3.1      | .....                                                                                                                                                                                                                                     |       |       |       |       |       | 1928 |
| 3.2      | . . . . . G . . . . . C . . . . . A . . . . . A . . . . . C . . . . .                                                                                                                                                                     |       |       |       |       |       | 1106 |
| 3.3      | . . . . . C . . . . .                                                                                                                                                                                                                     |       |       |       |       |       | 1938 |
| 3.4      | . . . . . C . . . . .                                                                                                                                                                                                                     |       |       |       |       |       | 1924 |
| 3.5      | . . . . . C . . . . .                                                                                                                                                                                                                     |       |       |       |       |       | 1923 |
| S3.1     | . . . . . C . . . . . A . . . . . A . . . . . C . . . . .                                                                                                                                                                                 |       |       |       |       |       | 2088 |
|          | 2,120                                                                                                                                                                                                                                     | 2,140 | 2,160 | 2,180 | 2,200 | 2,220 |      |
| MutsuDr3 | CAAAATGAAGAGAGTGAAAAGAAAAGCTTTTTT- - AACATATTAAGAAGGTTTTTAAAAAA- CTATAAACAAATAATAGTATGTGGGGATTTTAACTGTTTTTAGCAGAC                                                                                                                         |       |       |       |       |       | 2036 |
| 3.1      | .....                                                                                                                                                                                                                                     |       |       |       |       |       | 2036 |
| 3.2      | . . . . . C . . . . . T . . . . . C . . . . .                                                                                                                                                                                             |       |       |       |       |       | 1214 |
| 3.3      | .....                                                                                                                                                                                                                                     |       |       |       |       |       | 2046 |
| 3.4      | . . . . . T . . . . .                                                                                                                                                                                                                     |       |       |       |       |       | 2032 |
| 3.5      | . . . . . C . . . . . T . . . . . A . . . . . A . . . . . C . . . . .                                                                                                                                                                     |       |       |       |       |       | 2032 |
| S3.1     | . . . . . C . . . . . T . . . . . TT . . . . . A . . . . . C . . . . .                                                                                                                                                                    |       |       |       |       |       | 2198 |
|          | 2,240                                                                                                                                                                                                                                     | 2,260 | 2,280 | 2,300 | 2,320 |       |      |
| MutsuDr3 | AGGACATAACAGAAGGTATGGTTTTTAAATCAGACACGGGAAGGAAAGAACTAAAATCACTAATAGAGGAAAAAGGAATGATAGACATTTGGAGAGAAAGAAATGGGAAGA                                                                                                                           |       |       |       |       |       | 2147 |
| 3.1      | .....                                                                                                                                                                                                                                     |       |       |       |       |       | 2147 |
| 3.2      | . . . . . A . . . . .                                                                                                                                                                                                                     |       |       |       |       |       | 1325 |
| 3.3      | .....                                                                                                                                                                                                                                     |       |       |       |       |       | 2157 |
| 3.4      | .....                                                                                                                                                                                                                                     |       |       |       |       |       | 2143 |
| 3.5      | .....                                                                                                                                                                                                                                     |       |       |       |       |       | 2143 |
| S3.1     | . . . . . A . . . . .                                                                                                                                                                                                                     |       |       |       |       |       | 2309 |

Supplemental Figure S9

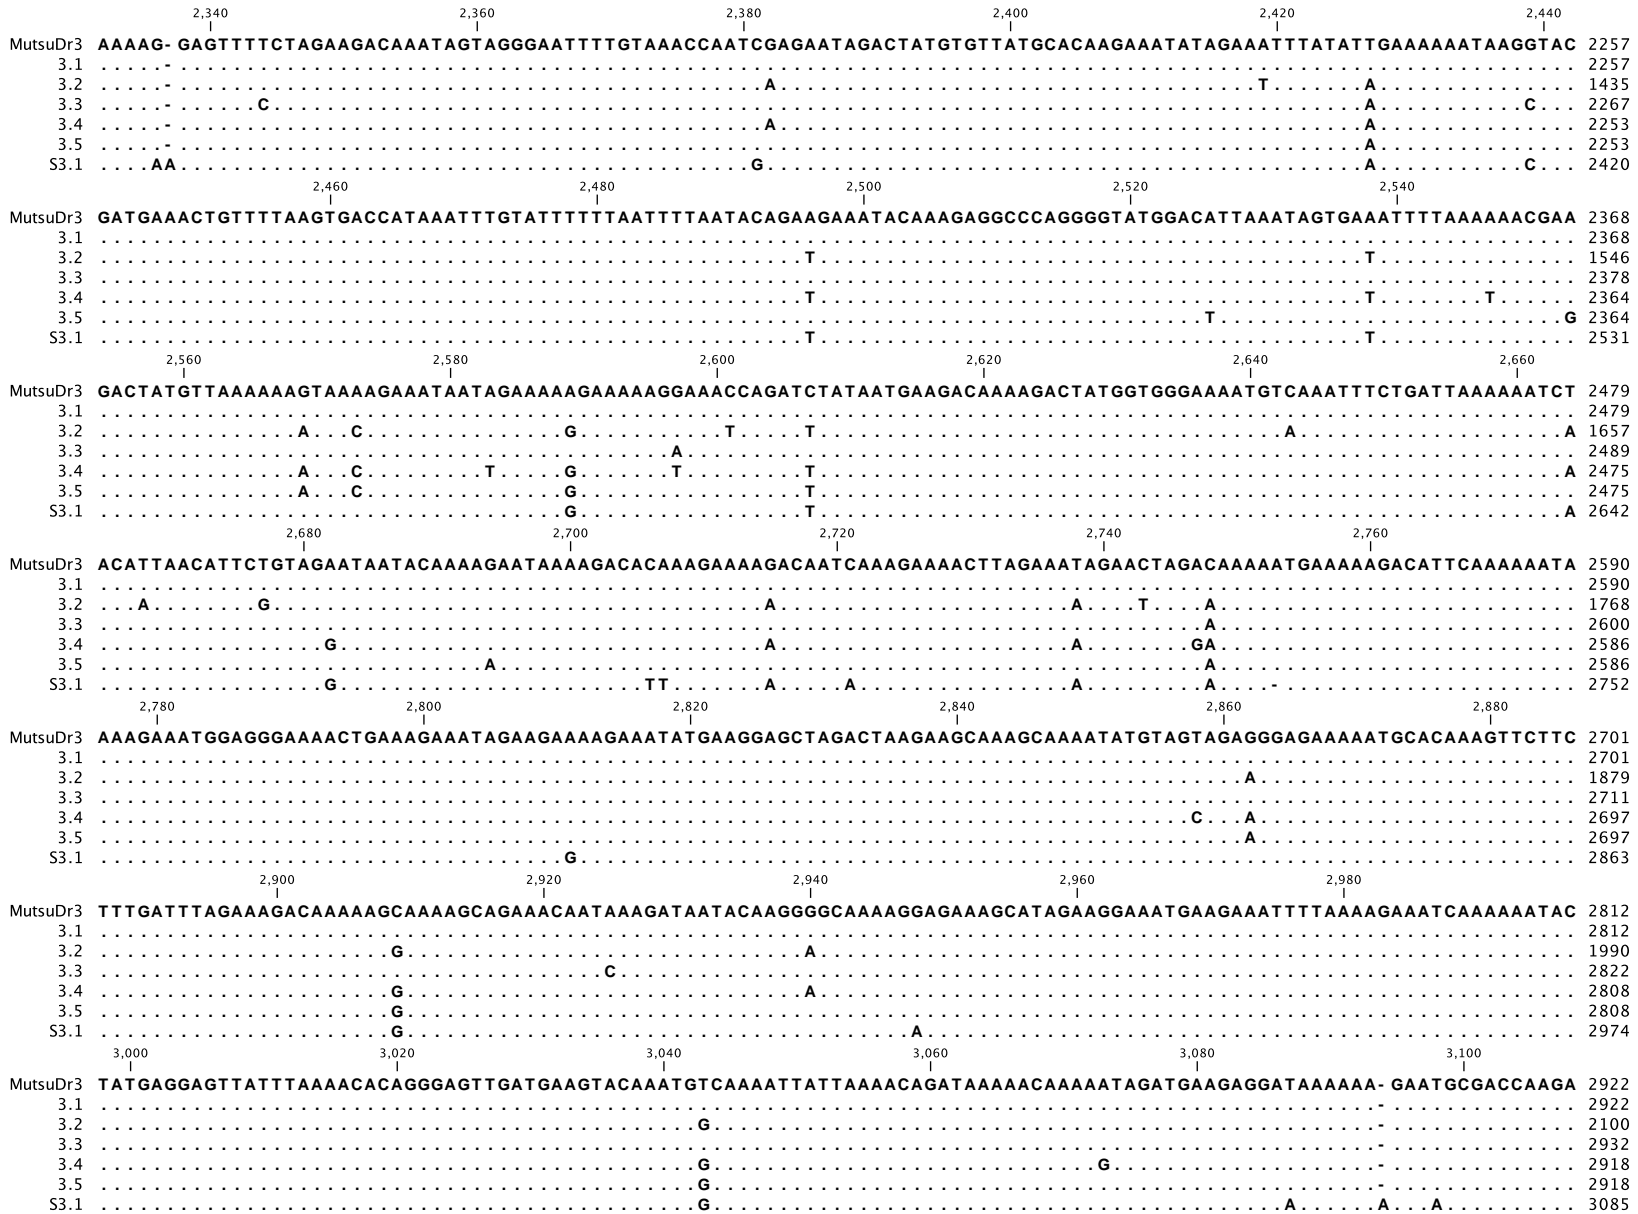

Supplemental Figure S9

|          |                                                                                                                  |       |   |       |  |       |   |       |   |       |   |       |      |
|----------|------------------------------------------------------------------------------------------------------------------|-------|---|-------|--|-------|---|-------|---|-------|---|-------|------|
|          |                                                                                                                  | 3,120 |   | 3,140 |  | 3,160 |   | 3,180 |   | 3,200 |   |       |      |
| MutsuDr3 | AATAGGGGAAGAAGAAATAAGAAAAGCAATAGAAAGCTTGAACAAAAAGAAAAGTCCAGGAATCGATGGTTTAAATAGTGAATTTTATGTATGTTTTAAAGAAATTTTAAAT |       |   |       |  |       |   |       |   |       |   | 3033  |      |
| 3.1      | .....                                                                                                            |       |   |       |  |       |   |       |   |       |   | 3033  |      |
| 3.2      | .....                                                                                                            |       |   |       |  |       |   | A     |   |       |   | 2211  |      |
| 3.3      | .....                                                                                                            |       |   |       |  |       |   | A     |   |       |   | 3043  |      |
| 3.4      | .....                                                                                                            |       |   |       |  |       |   | A     |   |       |   | 3029  |      |
| 3.5      | .....                                                                                                            |       |   |       |  |       |   |       |   |       |   | 3029  |      |
| S3.1     | .....                                                                                                            | A     |   | A     |  |       |   | A     |   |       | C | 3196  |      |
|          |                                                                                                                  | 3,220 |   | 3,240 |  | 3,260 |   | 3,280 |   | 3,300 |   | 3,320 |      |
| MutsuDr3 | TCCGATTTTAACTGACGTTTTTAAAGAAATACTGCAAAAAGAAAGAACTAAATGAAAGAATGGGAATGGGATTAATGAAATTAATACACAAAAAA-GGAGAAAAGACATTGT |       |   |       |  |       |   |       |   |       |   | 3143  |      |
| 3.1      | .....                                                                                                            |       |   |       |  |       |   |       |   |       |   | 3143  |      |
| 3.2      | .....                                                                                                            | A     |   | T     |  |       |   | G     |   |       |   | 2321  |      |
| 3.3      | .....                                                                                                            |       |   | G     |  |       | G |       |   |       |   | 3153  |      |
| 3.4      | .....                                                                                                            | A     |   | T     |  |       | G |       |   |       |   | 3139  |      |
| 3.5      | .....                                                                                                            | A     |   | T     |  |       | G |       |   |       |   | 3139  |      |
| S3.1     | .....                                                                                                            | A     |   |       |  |       |   |       |   |       | A | 3307  |      |
|          |                                                                                                                  | 3,340 |   | 3,360 |  | 3,380 |   | 3,400 |   | 3,420 |   | 3,440 |      |
| MutsuDr3 | TAAAAAATTACAGACCAATCACAATGTTAAACACAGATTTAAAGATTTTAAACAAAAATTTTAGCAAATAGATTTAAAGAAGTGATGCCAAAAATAATTAACAACACACAGG |       |   |       |  |       |   |       |   |       |   | 3254  |      |
| 3.1      | .....                                                                                                            |       |   |       |  |       |   |       |   |       |   | 3254  |      |
| 3.2      | .....                                                                                                            |       |   |       |  | G     |   |       |   |       |   | 2432  |      |
| 3.3      | .....                                                                                                            |       |   |       |  | G     |   |       |   |       |   | 3264  |      |
| 3.4      | .....                                                                                                            |       |   |       |  | G     |   |       |   |       |   | 3250  |      |
| 3.5      | .....                                                                                                            | A     |   |       |  | G     |   |       |   |       |   | 3250  |      |
| S3.1     | .....                                                                                                            |       |   |       |  | G     |   |       |   |       |   | 3418  |      |
|          |                                                                                                                  | 3,460 |   | 3,480 |  | 3,500 |   | 3,520 |   | 3,540 |   |       |      |
| MutsuDr3 | CCTATGCGATAAAAAGGAGAGACATAGCAGACATAACAATGAGCATAAAAAGACATCATAGAATATATGAAGGAGAAAAAAGAGGAAGGATATATAATAAGTCTGGATTTTG |       |   |       |  |       |   |       |   |       |   | 3365  |      |
| 3.1      | .....                                                                                                            |       |   |       |  |       |   |       |   |       |   | 3365  |      |
| 3.2      | .....                                                                                                            |       |   |       |  |       |   |       |   |       |   | 2543  |      |
| 3.3      | .....                                                                                                            |       |   |       |  |       |   |       |   |       |   | 3375  |      |
| 3.4      | .....                                                                                                            |       |   |       |  |       |   |       |   |       |   | 3361  |      |
| 3.5      | .....                                                                                                            |       |   |       |  |       |   |       |   |       |   | 3361  |      |
| S3.1     | .....                                                                                                            |       |   | T     |  |       |   |       |   |       |   | 3529  |      |
|          |                                                                                                                  | 3,560 |   | 3,580 |  | 3,600 |   | 3,620 |   | 3,640 |   | 3,660 |      |
| MutsuDr3 | AAAAAGCTTTTGATAGAGTTGAACACCAGTTTTTATTCAAAGTACTCAAAAAGTTTGGTTTTGGAGAAGTTTTTAGAAAATGGATAAAGA-T-TTGATAAGGGTATTTT    |       |   |       |  |       |   |       |   |       |   |       | 3474 |
| 3.1      | .....                                                                                                            |       |   |       |  |       |   |       |   |       |   | 3474  |      |
| 3.2      | .....                                                                                                            |       |   |       |  |       |   |       |   | GG    | A | 2654  |      |
| 3.3      | .....                                                                                                            |       |   |       |  |       |   |       |   |       |   | 3484  |      |
| 3.4      | .....                                                                                                            |       |   |       |  |       |   |       |   |       |   | 3470  |      |
| 3.5      | .....                                                                                                            |       |   |       |  | G     |   |       |   |       |   | 3470  |      |
| S3.1     | .....                                                                                                            |       |   |       |  |       |   |       |   |       | T | 3638  |      |
|          |                                                                                                                  | 3,680 |   | 3,700 |  | 3,720 |   | 3,740 |   | 3,760 |   |       |      |
| MutsuDr3 | AACAAAAATTAATGTAATGGCTTTTTAACAGAATGTTTTAAATAACAAGATCGATAAGGCAAGGATGTCCTCTGTCAGCACTTTTATATTCACCTTGTGGCAGAACCCT    |       |   |       |  |       |   |       |   |       |   |       | 3585 |
| 3.1      | .....                                                                                                            |       |   |       |  |       |   |       |   |       |   | 3585  |      |
| 3.2      | .....                                                                                                            |       | A |       |  |       |   |       |   |       |   | 2765  |      |
| 3.3      | .....                                                                                                            |       | A |       |  |       | A |       | C |       |   | 3595  |      |
| 3.4      | .....                                                                                                            |       | G |       |  |       |   |       |   |       |   | 3581  |      |
| 3.5      | .....                                                                                                            |       |   |       |  |       |   |       |   |       |   | 3581  |      |
| S3.1     | .....                                                                                                            |       |   |       |  | A     |   |       |   |       |   | 3749  |      |
|          |                                                                                                                  | 3,780 |   | 3,800 |  | 3,820 |   | 3,840 |   | 3,860 |   | 3,880 |      |
| MutsuDr3 | GGGCTTAGCTATCAACGAAGAAGAAAAATAAAAGGAATTGAGATTGAAGAAAATAAAGTAAATAAAAAAATGTTTCAATATGCAGATGACACCACATTAATAGTAAAAGG   |       |   |       |  |       |   |       |   |       |   |       | 3696 |
| 3.1      | .....                                                                                                            |       |   |       |  |       |   |       |   |       |   | 3696  |      |
| 3.2      | .....                                                                                                            |       |   |       |  |       |   |       |   |       | T | 2876  |      |
| 3.3      | .....                                                                                                            |       |   |       |  |       |   |       |   |       | T | 3706  |      |
| 3.4      | .....                                                                                                            |       |   |       |  |       |   |       |   |       | T | 3692  |      |
| 3.5      | .....                                                                                                            |       |   |       |  |       |   |       |   |       | T | 3691  |      |
| S3.1     | .....                                                                                                            |       |   |       |  |       |   |       |   |       | T | 3859  |      |



Supplemental Figure S9

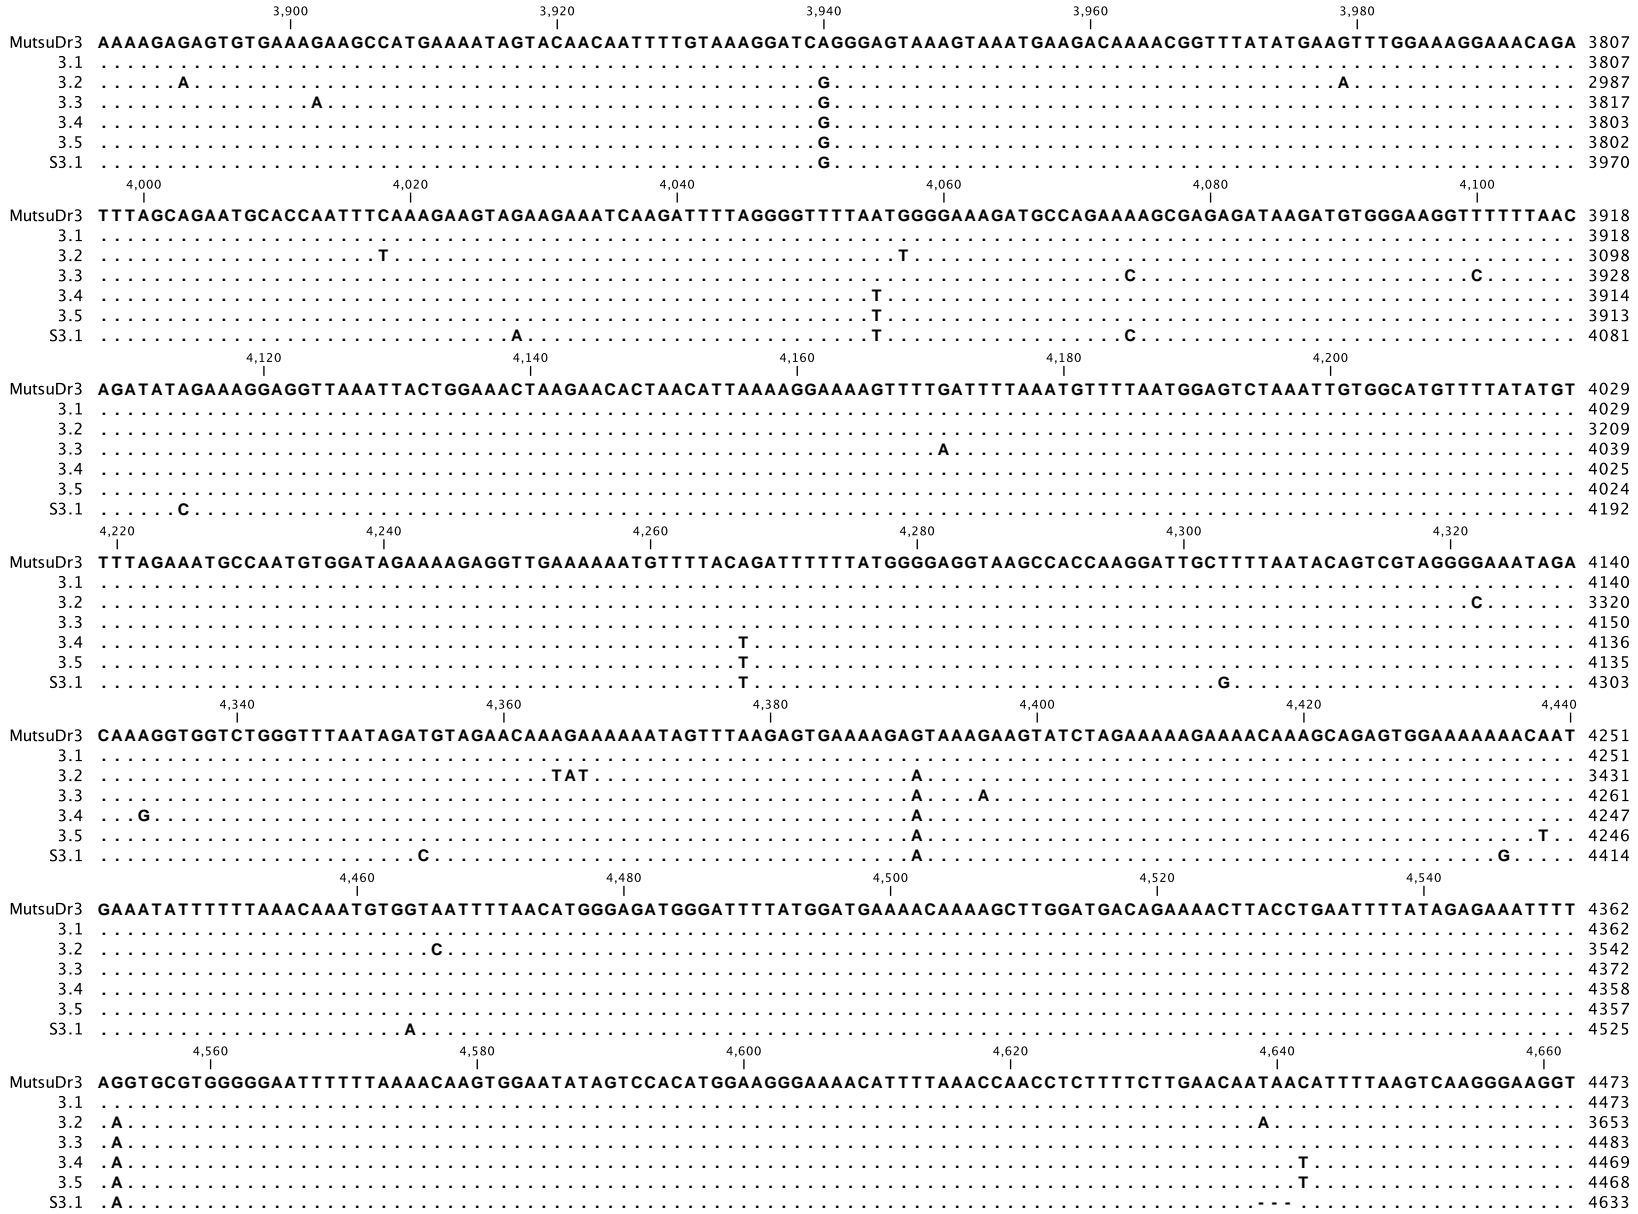

Supplemental Figure S9

|          |                                                                                                                 |       |       |       |       |       |       |
|----------|-----------------------------------------------------------------------------------------------------------------|-------|-------|-------|-------|-------|-------|
|          |                                                                                                                 | 4,680 | 4,700 | 4,720 | 4,740 | 4,760 |       |
| MutsuDr3 | TTTATACTATAAGAAATGGATAGAAAGTTGGGATTTTAAAAGT                                                                     |       |       |       |       |       | 4584  |
| 3.1      | .....                                                                                                           |       |       |       |       |       | 4584  |
| 3.2      | .....                                                                                                           |       |       |       | T     |       | 3764  |
| 3.3      | .....                                                                                                           |       |       |       |       | G     | 4594  |
| 3.4      | .....                                                                                                           |       |       |       |       |       | 4580  |
| 3.5      | .....                                                                                                           |       |       |       |       |       | 4579  |
| S3.1     | .....                                                                                                           |       |       |       |       | A     | 4744  |
|          |                                                                                                                 | 4,780 | 4,800 | 4,820 | 4,840 | 4,860 | 4,880 |
| MutsuDr3 | GGCGAAAGAGGAATACAACAGAAAGGAAATTGAGAAAAATCTTGACATAATTAACAGGCAATTC                                                |       |       |       |       |       | 4695  |
| 3.1      | .....                                                                                                           |       |       |       |       |       | 4695  |
| 3.2      | .....                                                                                                           |       |       | G     |       | A     | 3875  |
| 3.3      | .....                                                                                                           |       |       |       |       | C     | 4705  |
| 3.4      | .....                                                                                                           |       |       | G     |       | A     | 4691  |
| 3.5      | .....                                                                                                           |       |       | G     |       | A     | 4690  |
| S3.1     | A.....                                                                                                          |       |       | G     |       | A     | 4855  |
|          |                                                                                                                 | 4,900 | 4,920 | 4,940 | 4,960 | 4,980 |       |
| MutsuDr3 | AACAAAAGAAAGTGTATGTGAAACAGGTGAAAAAATATGCAATTTTAATGAATGTACTGTGAAAAATATTTATTGTTTTTTT-AGAGAGAATGTTTTTAAAGAACCAACAG |       |       |       |       |       | 4805  |
| 3.1      | .....                                                                                                           |       |       |       |       |       | 4805  |
| 3.2      | .....                                                                                                           |       |       |       |       |       | 3985  |
| 3.3      | .....                                                                                                           |       | G     |       |       |       | 4815  |
| 3.4      | .....                                                                                                           |       |       |       |       |       | 4801  |
| 3.5      | .....                                                                                                           |       |       |       |       |       | 4800  |
| S3.1     | .....                                                                                                           |       | G.T   |       | T     |       | 4966  |
|          |                                                                                                                 | 5,000 | 5,020 | 5,040 | 5,060 | 5,080 | 5,100 |
| MutsuDr3 | CAACAATACTGGATAGAGAAATACAAAATGTAAGAACAATGAAATATGGGGAACATGAAAGGAAGGTATGTGGAACAAAAGTCGAATGTCTAGAATTTTTAATAA       |       |       |       |       |       | 4916  |
| 3.1      | .....                                                                                                           |       |       |       |       |       | 4916  |
| 3.2      | .....                                                                                                           |       |       |       | C     |       | 4096  |
| 3.3      | .....                                                                                                           |       |       |       |       | T     | 4926  |
| 3.4      | .....                                                                                                           |       |       |       |       | A     | 4912  |
| 3.5      | .....                                                                                                           |       |       |       |       | A     | 4911  |
| S3.1     | .....                                                                                                           |       |       | A     |       | A     | 5076  |
|          |                                                                                                                 | 5,120 | 5,140 | 5,160 | 5,180 | 5,200 |       |
| MutsuDr3 | GGCACAAGCAATCTTTTCTGATGTCATTTTAAACAAGATAGGAATGGAACAAAGTGGAATGTGTAAGTATGTCAAAAAGAAGAGGGTTTTTACACATGTTTTTAT       |       |       |       |       |       | 5027  |
| 3.1      | .....                                                                                                           |       |       |       |       |       | 5027  |
| 3.2      | .....                                                                                                           |       |       |       |       | G     | 4207  |
| 3.3      | .....                                                                                                           |       |       | G     |       |       | 5037  |
| 3.4      | .....                                                                                                           |       |       | G     |       |       | 5023  |
| 3.5      | .....                                                                                                           |       |       | G     |       |       | 5022  |
| S3.1     | .....                                                                                                           |       |       | G     |       | A     | 5187  |
|          |                                                                                                                 | 5,220 | 5,240 | 5,260 | 5,280 | 5,300 | 5,320 |
| MutsuDr3 | ATTGTCAAAAATTGGAAGGTTTTTAAAAGATTGTAAGTTTTAATTAAGGACTACTTGGAGACTGGGATGAAAATGAAACAGAATGGAACAGAGTAGTGATGTTGGGAT    |       |       |       |       |       | 5138  |
| 3.1      | .....                                                                                                           |       |       |       |       |       | 5138  |
| 3.2      | .....                                                                                                           |       |       |       |       |       | 4318  |
| 3.3      | G.....                                                                                                          |       |       | A     |       |       | 5148  |
| 3.4      | G.....                                                                                                          |       |       |       |       |       | 5134  |
| 3.5      | C.G.....                                                                                                        |       |       |       |       |       | 5133  |
| S3.1     | G.....                                                                                                          |       |       |       |       |       | 5298  |
|          |                                                                                                                 | 5,340 | 5,360 | 5,380 | 5,400 | 5,420 |       |
| MutsuDr3 | GGAATAAGAACAATGAAAATAA-GAAAATAGTAAACCTATGTATAATGCTGATGAAAAATGCAATGTGGGAAAGGAGAATTGTGGCAAAAAGAGAAAATGGTGATGGAT   |       |       |       |       |       | 5248  |
| 3.1      | .....                                                                                                           |       |       |       |       |       | 5248  |
| 3.2      | .....                                                                                                           |       |       |       | A     |       | 4428  |
| 3.3      | .....                                                                                                           |       |       |       |       | G     | 5258  |
| 3.4      | .....                                                                                                           |       |       |       |       |       | 5244  |
| 3.5      | .....                                                                                                           |       |       |       |       |       | 5243  |
| S3.1     | .....                                                                                                           |       | G.T   |       |       |       | 5409  |

Supplemental Figure S9

|          |                                                                                                                |       |       |       |       |       |      |
|----------|----------------------------------------------------------------------------------------------------------------|-------|-------|-------|-------|-------|------|
|          | 5,440                                                                                                          | 5,460 | 5,480 | 5,500 | 5,520 | 5,540 |      |
| MutsuDr3 | GTATGGGGAATTTTAAAGAGGAAAATGGAGAGATATGTGGAAAACTGTATGTATATCATAAAAATGAGAACATTTTGAGTGAGCTGCACAAAATTCTGACGGACAAAGCA |       |       |       |       |       | 5359 |
| 3.1      | .....                                                                                                          |       |       |       |       |       | 5359 |
| 3.2      | .....A.....                                                                                                    |       |       |       |       |       | 4539 |
| 3.3      | .....G.....                                                                                                    |       |       |       |       |       | 5369 |
| 3.4      | .....A.....                                                                                                    |       |       |       |       |       | 5355 |
| 3.5      | .....A.....                                                                                                    |       |       |       |       |       | 5354 |
| S3.1     | .....A.....T.....T.....G.....A.....                                                                            |       |       |       |       |       | 5520 |
|          | 5,560                                                                                                          | 5,580 | 5,600 | 5,620 | 5,640 | 5,660 |      |
| MutsuDr3 | TGTCAAGTTTTTAAAGAAATGAACTGGAACTACCACATTTTAAATGTTTTGAATATGAAATGATCTTTTAAATGTCTGTTTTATTATGATTTACTGTAAAAGATTGTAAT |       |       |       |       |       | 5470 |
| 3.1      | .....                                                                                                          |       |       |       |       |       | 5470 |
| 3.2      | A.....G.....                                                                                                   |       |       |       |       |       | 4650 |
| 3.3      | .....A.....                                                                                                    |       |       |       |       |       | 5480 |
| 3.4      | .....T.....                                                                                                    |       |       |       |       |       | 5466 |
| 3.5      | .....AAA.AA.AA.AAA.AAAA.....A.AAAA.A                                                                           |       |       |       |       |       | 5465 |
| S3.1     | .....G.G.....                                                                                                  |       |       |       |       |       | 5631 |
|          | 5,680                                                                                                          | 5,700 |       |       |       |       |      |
| MutsuDr3 | TGAAATTGGTTCAATAAAAAAAAAAAAAAAAAAAAAAAAAAAAAA--                                                                |       |       |       |       |       | 5520 |
| 3.1      | .....                                                                                                          |       |       |       |       |       | 5520 |
| 3.2      | .....AAA                                                                                                       |       |       |       |       |       | 4703 |
| 3.3      | C.....                                                                                                         |       |       |       |       |       | 5523 |
| 3.4      | .....                                                                                                          |       |       |       |       |       | 5509 |
| 3.5      | AAG.....                                                                                                       |       |       |       |       |       | 5468 |
| S3.1     | .....G.....                                                                                                    |       |       |       |       |       | 5667 |

Supplemental Figure S9

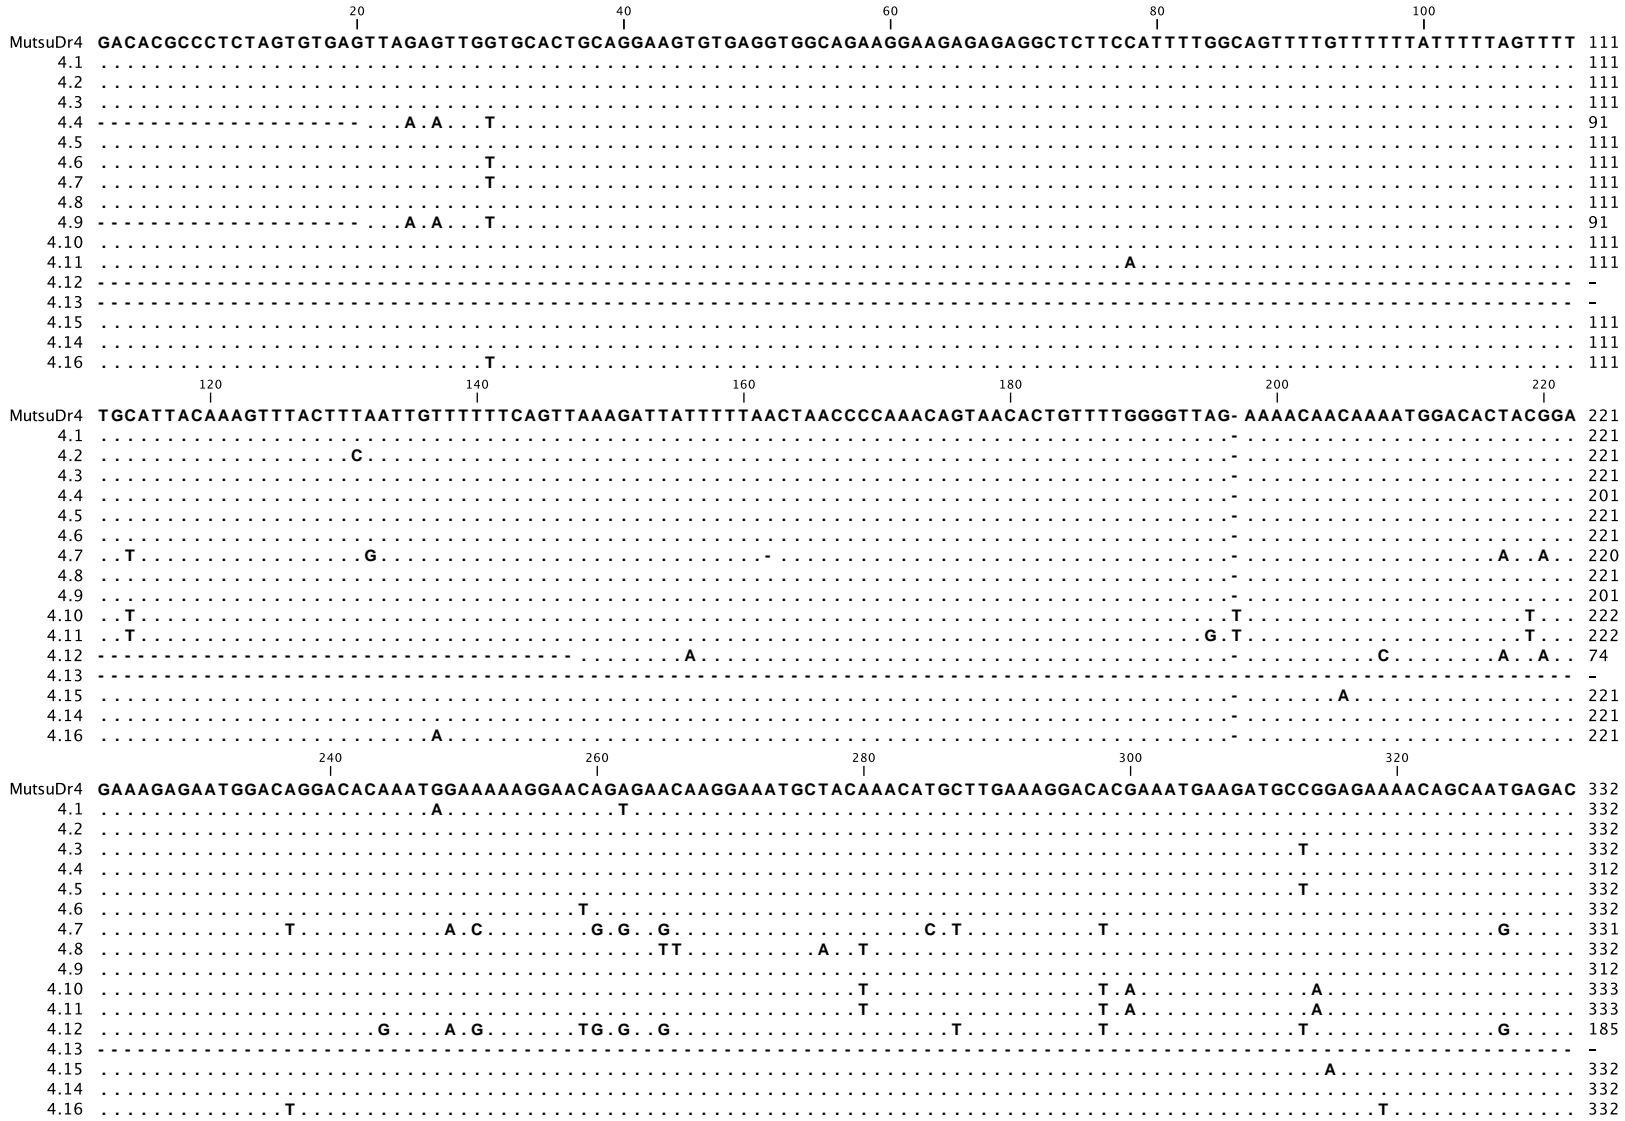

Supplemental Figure S9

|          |                                                                                                                   |     |     |     |     |     |     |
|----------|-------------------------------------------------------------------------------------------------------------------|-----|-----|-----|-----|-----|-----|
|          | 340                                                                                                               | 360 | 380 | 400 | 420 | 440 |     |
| MutsuDr4 | ATGGGCAACAGTTGTCTCAAAGAAAAAGAAAGGAAAAGGAGGTGGTCAAGAAAAGAAAGGGGATCTACAATCAATTGCAAGTATTGAAAAGTGAAAAGAATACTGAAGGACA  |     |     |     |     |     | 443 |
| 4.1      | .....G.....TA.....                                                                                                |     |     |     |     |     | 443 |
| 4.2      | .....G.....TA.....                                                                                                |     |     |     |     |     | 443 |
| 4.3      | .....G.....TA.....                                                                                                |     |     |     |     |     | 443 |
| 4.4      | .....G.....TA.....T.....                                                                                          |     |     |     |     |     | 423 |
| 4.5      | .....G.....TA.....                                                                                                |     |     |     |     |     | 443 |
| 4.6      | .....G.....TA.....                                                                                                |     |     |     |     |     | 443 |
| 4.7      | .....T.....A.....A.....T.....                                                                                     |     |     |     |     |     | 442 |
| 4.8      | .....A.....A.....A.....T.....                                                                                     |     |     |     |     |     | 443 |
| 4.9      | .....T.....C.A.....C.....T.....T.....                                                                             |     |     |     |     |     | 423 |
| 4.10     | .....T.....C.A.....C.....T.....T.....                                                                             |     |     |     |     |     | 444 |
| 4.11     | .....T.....C.A.....C.....T.....                                                                                   |     |     |     |     |     | 444 |
| 4.12     | .....T.....G.....T.C.A.....A.....T.....                                                                           |     |     |     |     |     | 296 |
| 4.13     | -----                                                                                                             |     |     |     |     |     | -   |
| 4.15     | .....G.....TA.....                                                                                                |     |     |     |     |     | 443 |
| 4.14     | .....G.....TA.....A.....                                                                                          |     |     |     |     |     | 443 |
| 4.16     | .....A.....T.....                                                                                                 |     |     |     |     |     | 443 |
|          | 460                                                                                                               | 480 | 500 | 520 | 540 |     |     |
| MutsuDr4 | AAGGAATGCTTTAAGTCAAAAACAACAAATGCTGAACAAACTAAAGAAGCAAGCAAGATATCAAAGAGAATATAAGAAGGAA- GCCACACTGACAATGATGATAAAGGATG  |     |     |     |     |     | 553 |
| 4.1      | .....T.....A.....                                                                                                 |     |     |     |     |     | 553 |
| 4.2      | .....T.....A.....                                                                                                 |     |     |     |     |     | 553 |
| 4.3      | .....T.....A.....                                                                                                 |     |     |     |     |     | 553 |
| 4.4      | .....G.C.....G.C.....A.....G..GA..CA                                                                              |     |     |     |     |     | 533 |
| 4.5      | .....T.....A.....                                                                                                 |     |     |     |     |     | 553 |
| 4.6      | .....T.....A.....                                                                                                 |     |     |     |     |     | 553 |
| 4.7      | .....G.....G.....G.C.....A.A.....A.....G..GA..CA                                                                  |     |     |     |     |     | 553 |
| 4.8      | .....G.....G.....G.C.....A.A.....A.....G..GA..CA                                                                  |     |     |     |     |     | 553 |
| 4.9      | .....G.....G.....G.C.....A.....G..GA..CA                                                                          |     |     |     |     |     | 533 |
| 4.10     | .....G.....A.....G.C.....A.....G..GA..CA                                                                          |     |     |     |     |     | 554 |
| 4.11     | .....G.....A.....G.C.....A.....G..GA..CA                                                                          |     |     |     |     |     | 554 |
| 4.12     | .....G.....A.....G.C.....A.....G..GA..CA                                                                          |     |     |     |     |     | 406 |
| 4.13     | -----                                                                                                             |     |     |     |     |     | -   |
| 4.15     | .....T.....A.A.A.....G..GA..CA                                                                                    |     |     |     |     |     | 553 |
| 4.14     | .....T.....A.A.A.....G..GA..CA                                                                                    |     |     |     |     |     | 553 |
| 4.16     | .....T.....A.A.A.....G..GA..CA                                                                                    |     |     |     |     |     | 553 |
|          | 560                                                                                                               | 580 | 600 | 620 | 640 | 660 |     |
| MutsuDr4 | TTGAAAACACTCAACTATAAACAACATAATCAAAGCAGTTGAAGACAAAGTGGGGATTGGCAAATTAATTGGACTGAGAAGGAAAAACAACAATGAATTTGAACTGACAATGG |     |     |     |     |     | 664 |
| 4.1      | .....C.....C.....                                                                                                 |     |     |     |     |     | 664 |
| 4.2      | .....C.....C.....                                                                                                 |     |     |     |     |     | 664 |
| 4.3      | .....G.....T.....A.....C.....C.C.....A.....                                                                       |     |     |     |     |     | 644 |
| 4.4      | .....G.....T.....A.....C.....C.C.....A.....                                                                       |     |     |     |     |     | 664 |
| 4.5      | .....G.....T.....A.....C.....C.C.....A.....                                                                       |     |     |     |     |     | 664 |
| 4.6      | .....G.....T.....A.....C.....C.C.....A.....                                                                       |     |     |     |     |     | 664 |
| 4.7      | .....T.....T.....A.....C.....C.C.....A.....                                                                       |     |     |     |     |     | 664 |
| 4.8      | .....T.....T.....A.....C.....C.....C.....                                                                         |     |     |     |     |     | 664 |
| 4.9      | .....G.....T.....A.....C.....C.....A.....                                                                         |     |     |     |     |     | 644 |
| 4.10     | .....T.....G.....C.....C.....A.....                                                                               |     |     |     |     |     | 665 |
| 4.11     | .....T.....G.....C.....C.....A.....                                                                               |     |     |     |     |     | 665 |
| 4.12     | .....G.....T.....A.....C.....C.....A.....                                                                         |     |     |     |     |     | 517 |
| 4.13     | -----                                                                                                             |     |     |     |     |     | -   |
| 4.15     | .....G.....C.....C.....A.....                                                                                     |     |     |     |     |     | 664 |
| 4.14     | .....T.....G.....C.....C.....A.....                                                                               |     |     |     |     |     | 664 |
| 4.16     | .....T.....G.....C.....C.....A.....                                                                               |     |     |     |     |     | 664 |

Supplemental Figure S9

|          |                                                                                                                         |     |  |     |  |     |  |     |  |     |     |     |
|----------|-------------------------------------------------------------------------------------------------------------------------|-----|--|-----|--|-----|--|-----|--|-----|-----|-----|
|          |                                                                                                                         | 680 |  | 700 |  | 720 |  | 740 |  | 760 |     |     |
| MutsuDr4 | <b>AAAGTGAAAAGAATGCGAGATATTGATAAACGGACTGATGATTAATGGAGAAGAATGTGAAGTGAAAAGCTGTGTGCAACAGAAAAATGGTATCTTTCCTGAACTTGC</b>     |     |  |     |  |     |  |     |  |     | 775 |     |
| 4.1      | .....T.....T.....                                                                                                       |     |  |     |  |     |  |     |  |     | 775 |     |
| 4.2      | .....                                                                                                                   |     |  |     |  |     |  |     |  |     | 775 |     |
| 4.3      | .....T.....                                                                                                             |     |  |     |  |     |  |     |  |     | 775 |     |
| 4.4      | .....T.....GA.....                                                                                                      |     |  |     |  |     |  |     |  |     | 755 |     |
| 4.5      | .....T.....                                                                                                             |     |  |     |  |     |  |     |  |     | 775 |     |
| 4.6      | .....T.....                                                                                                             |     |  |     |  |     |  |     |  |     | 775 |     |
| 4.7      | .....T.....GA.....A.T.....                                                                                              |     |  |     |  |     |  |     |  |     | 775 |     |
| 4.8      | .....T.....                                                                                                             |     |  |     |  |     |  |     |  |     | 775 |     |
| 4.9      | .....T.....GA.....                                                                                                      |     |  |     |  |     |  |     |  |     | 755 |     |
| 4.10     | .....T.....GA.....                                                                                                      |     |  |     |  |     |  |     |  |     | 776 |     |
| 4.11     | .....T.....GA.....                                                                                                      |     |  |     |  |     |  |     |  |     | 776 |     |
| 4.12     | .....T.....GA.....A.T.....                                                                                              |     |  |     |  |     |  |     |  |     | 628 |     |
| 4.13     | -----                                                                                                                   |     |  |     |  |     |  |     |  |     | -   |     |
| 4.15     | .....T.....G.....                                                                                                       |     |  |     |  |     |  |     |  |     | 775 |     |
| 4.14     | .....G.....T.....                                                                                                       |     |  |     |  |     |  |     |  |     | 775 |     |
| 4.16     | .....T.....GA.....                                                                                                      |     |  |     |  |     |  |     |  |     | 775 |     |
|          |                                                                                                                         | 780 |  | 800 |  | 820 |  | 840 |  | 860 |     | 880 |
| MutsuDr4 | <b>CCAGTTATATACAGGATGAGGAGATACAACAGAAACTGAGTAATTGGGGAGTAACTCCTATACTGCCAATAAGAAGGAATATCATCCGGGAACAATGGTTGCAGACGGAA</b>   |     |  |     |  |     |  |     |  |     |     | 886 |
| 4.1      | .....G.....G.....A.....                                                                                                 |     |  |     |  |     |  |     |  |     |     | 886 |
| 4.2      | .....G.....                                                                                                             |     |  |     |  |     |  |     |  |     |     | 886 |
| 4.3      | .....                                                                                                                   |     |  |     |  |     |  |     |  |     |     | 886 |
| 4.4      | .....A.A.....G.T.A.A.....G.T.....                                                                                       |     |  |     |  |     |  |     |  |     |     | 866 |
| 4.5      | .....A.....                                                                                                             |     |  |     |  |     |  |     |  |     |     | 886 |
| 4.6      | .....                                                                                                                   |     |  |     |  |     |  |     |  |     |     | 886 |
| 4.7      | .A.....C.....T.....A.C.....G.T.A.....T.....G.T.....                                                                     |     |  |     |  |     |  |     |  |     |     | 886 |
| 4.8      | .....                                                                                                                   |     |  |     |  |     |  |     |  |     |     | 886 |
| 4.9      | .....A.A.....G.T.A.....G.T.....                                                                                         |     |  |     |  |     |  |     |  |     |     | 866 |
| 4.10     | .....A.A.....G.T.A.....G.T.....                                                                                         |     |  |     |  |     |  |     |  |     |     | 887 |
| 4.11     | .....A.A.....G.T.A.....G.T.....                                                                                         |     |  |     |  |     |  |     |  |     |     | 887 |
| 4.12     | .A.....A.....T.....A.C.....G.T.A.....G.T.....                                                                           |     |  |     |  |     |  |     |  |     |     | 739 |
| 4.13     | -----                                                                                                                   |     |  |     |  |     |  |     |  |     |     | 38  |
| 4.15     | .....                                                                                                                   |     |  |     |  |     |  |     |  |     |     | 886 |
| 4.14     | .....                                                                                                                   |     |  |     |  |     |  |     |  |     |     | 886 |
| 4.16     | .....A.A.....T.A.T.....A.....                                                                                           |     |  |     |  |     |  |     |  |     |     | 886 |
|          |                                                                                                                         | 900 |  | 920 |  | 940 |  | 960 |  | 980 |     |     |
| MutsuDr4 | <b>CACGATTTGTGAAGGTAAAGTTTCCCAAAGAAGTTAAATCTTTACCATACAATGTTGGCTTCATGACGGAAGAAGGGATGCAGTATTTTCAGAGTGATACATGACAATCAAC</b> |     |  |     |  |     |  |     |  |     | 997 |     |
| 4.1      | .....T.....                                                                                                             |     |  |     |  |     |  |     |  |     |     | 997 |
| 4.2      | .....A.....T.A.....T.C.T.....T.....                                                                                     |     |  |     |  |     |  |     |  |     |     | 997 |
| 4.3      | .....                                                                                                                   |     |  |     |  |     |  |     |  |     |     | 997 |
| 4.4      | ..C..C.G..A.....G.....A.....T.T.....                                                                                    |     |  |     |  |     |  |     |  |     |     | 977 |
| 4.5      | .....                                                                                                                   |     |  |     |  |     |  |     |  |     |     | 997 |
| 4.6      | .....                                                                                                                   |     |  |     |  |     |  |     |  |     |     | 997 |
| 4.7      | ..AC..C.G..A.....G.....A.....A.....                                                                                     |     |  |     |  |     |  |     |  |     |     | 997 |
| 4.8      | .....G.....                                                                                                             |     |  |     |  |     |  |     |  |     |     | 997 |
| 4.9      | ..C..C.G..A.....G.....A.....T.T.....                                                                                    |     |  |     |  |     |  |     |  |     |     | 977 |
| 4.10     | ..C..C.GA..A.....G.....A.....T.T.....                                                                                   |     |  |     |  |     |  |     |  |     |     | 998 |
| 4.11     | ..C..C.GA..A.....G.....G.....A.....T.T.....                                                                             |     |  |     |  |     |  |     |  |     |     | 998 |
| 4.12     | ..C..C.G..A.....G.....A.....T.T.....                                                                                    |     |  |     |  |     |  |     |  |     |     | 850 |
| 4.13     | .....G.....                                                                                                             |     |  |     |  |     |  |     |  |     |     | 149 |
| 4.15     | .....                                                                                                                   |     |  |     |  |     |  |     |  |     |     | 997 |
| 4.14     | .....                                                                                                                   |     |  |     |  |     |  |     |  |     |     | 997 |
| 4.16     | .....A.....G.....T.....A.....T.T.....                                                                                   |     |  |     |  |     |  |     |  |     |     | 997 |

Supplemental Figure S9

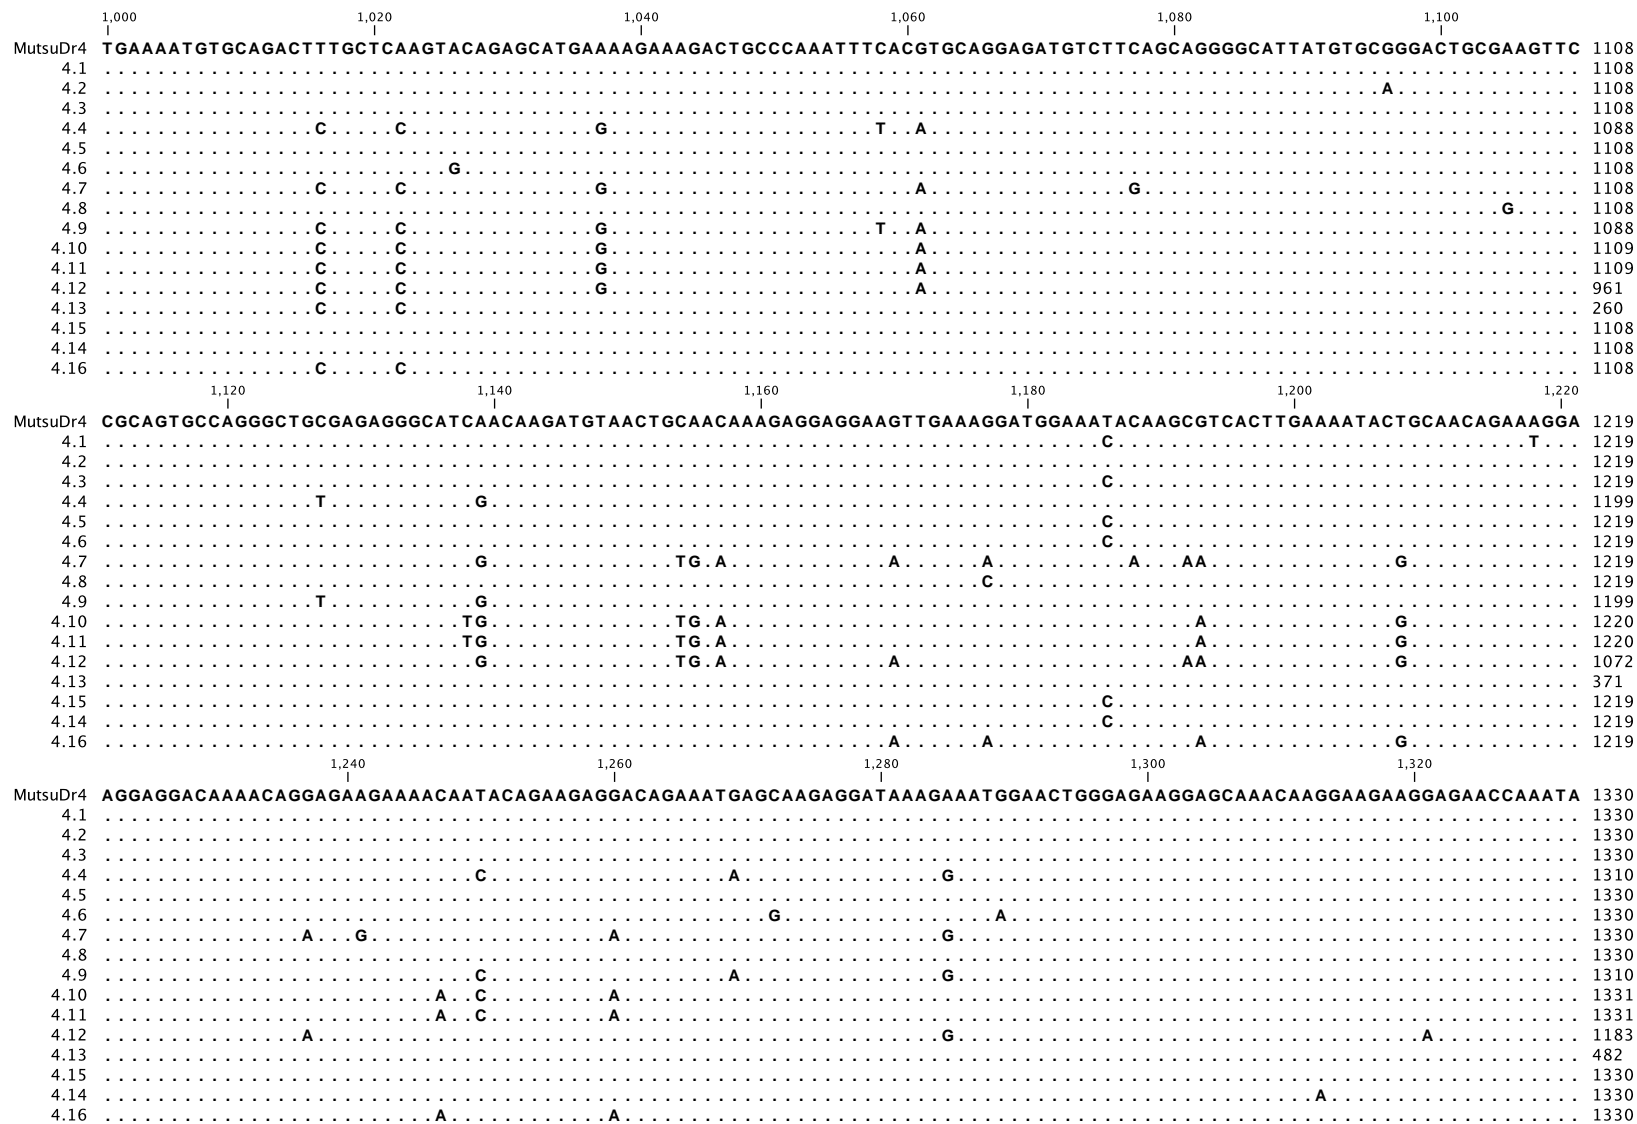

Supplemental Figure S9

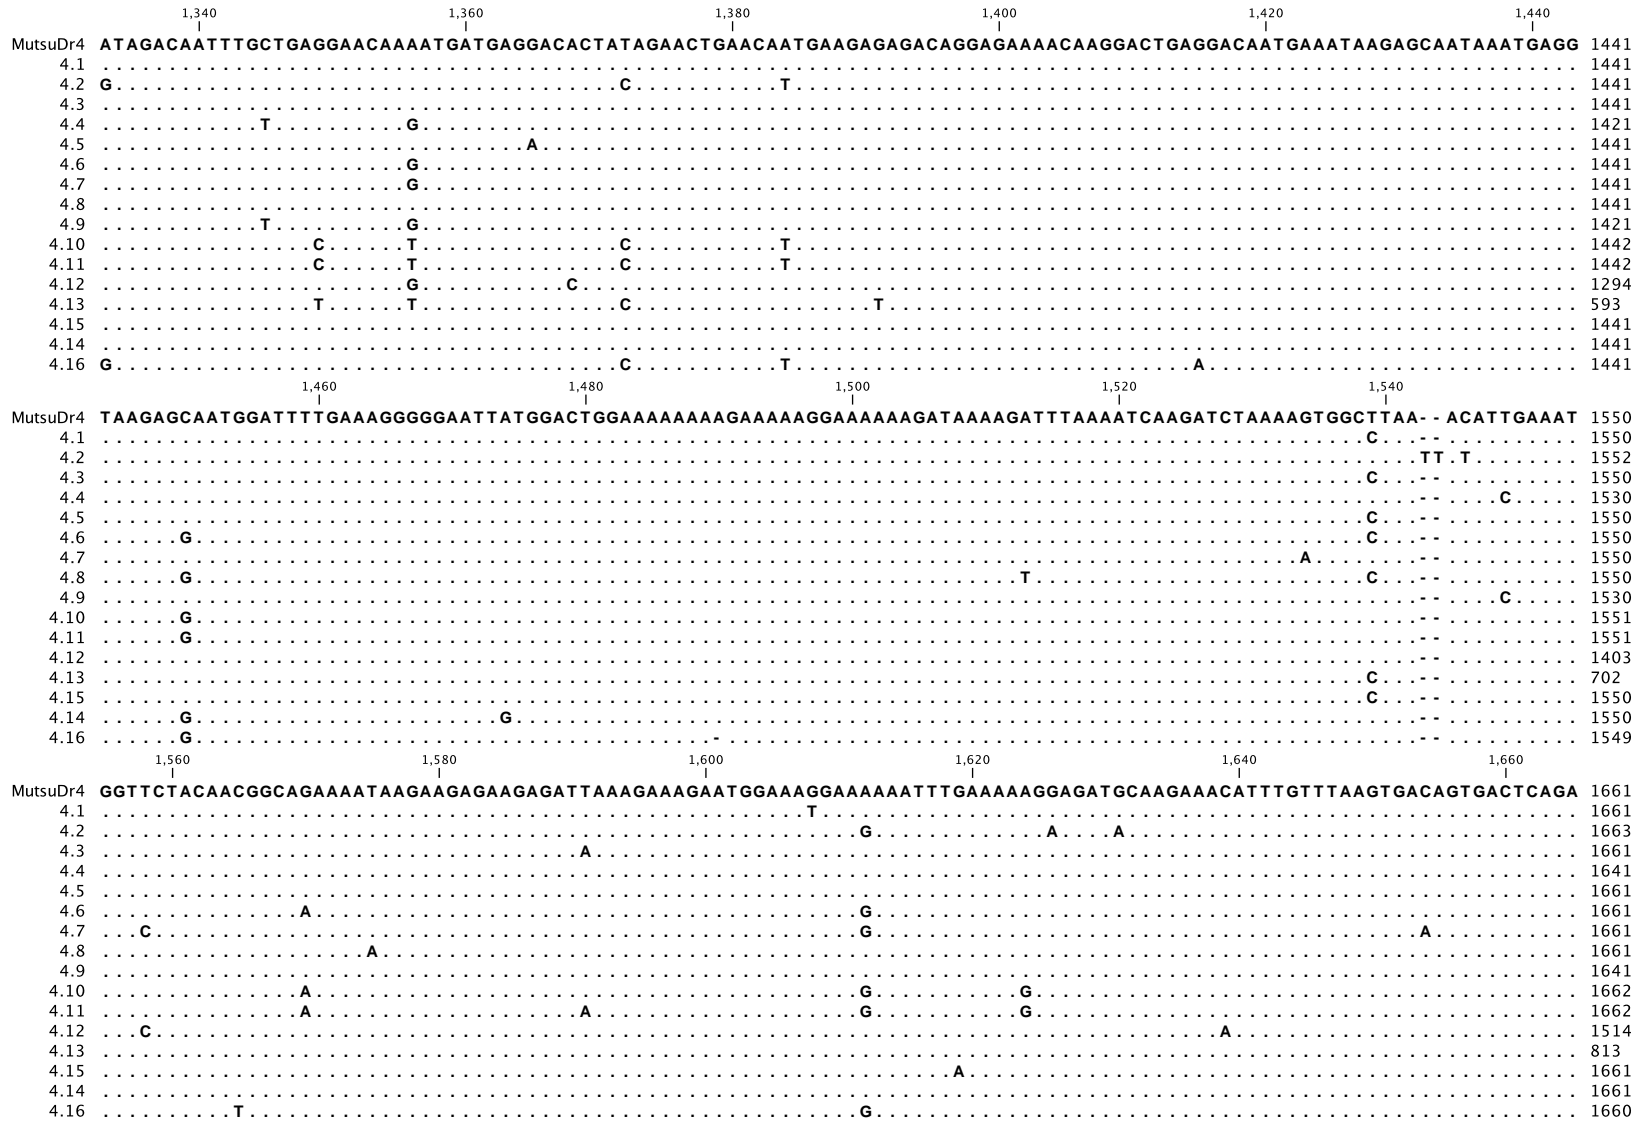



Supplemental Figure S9

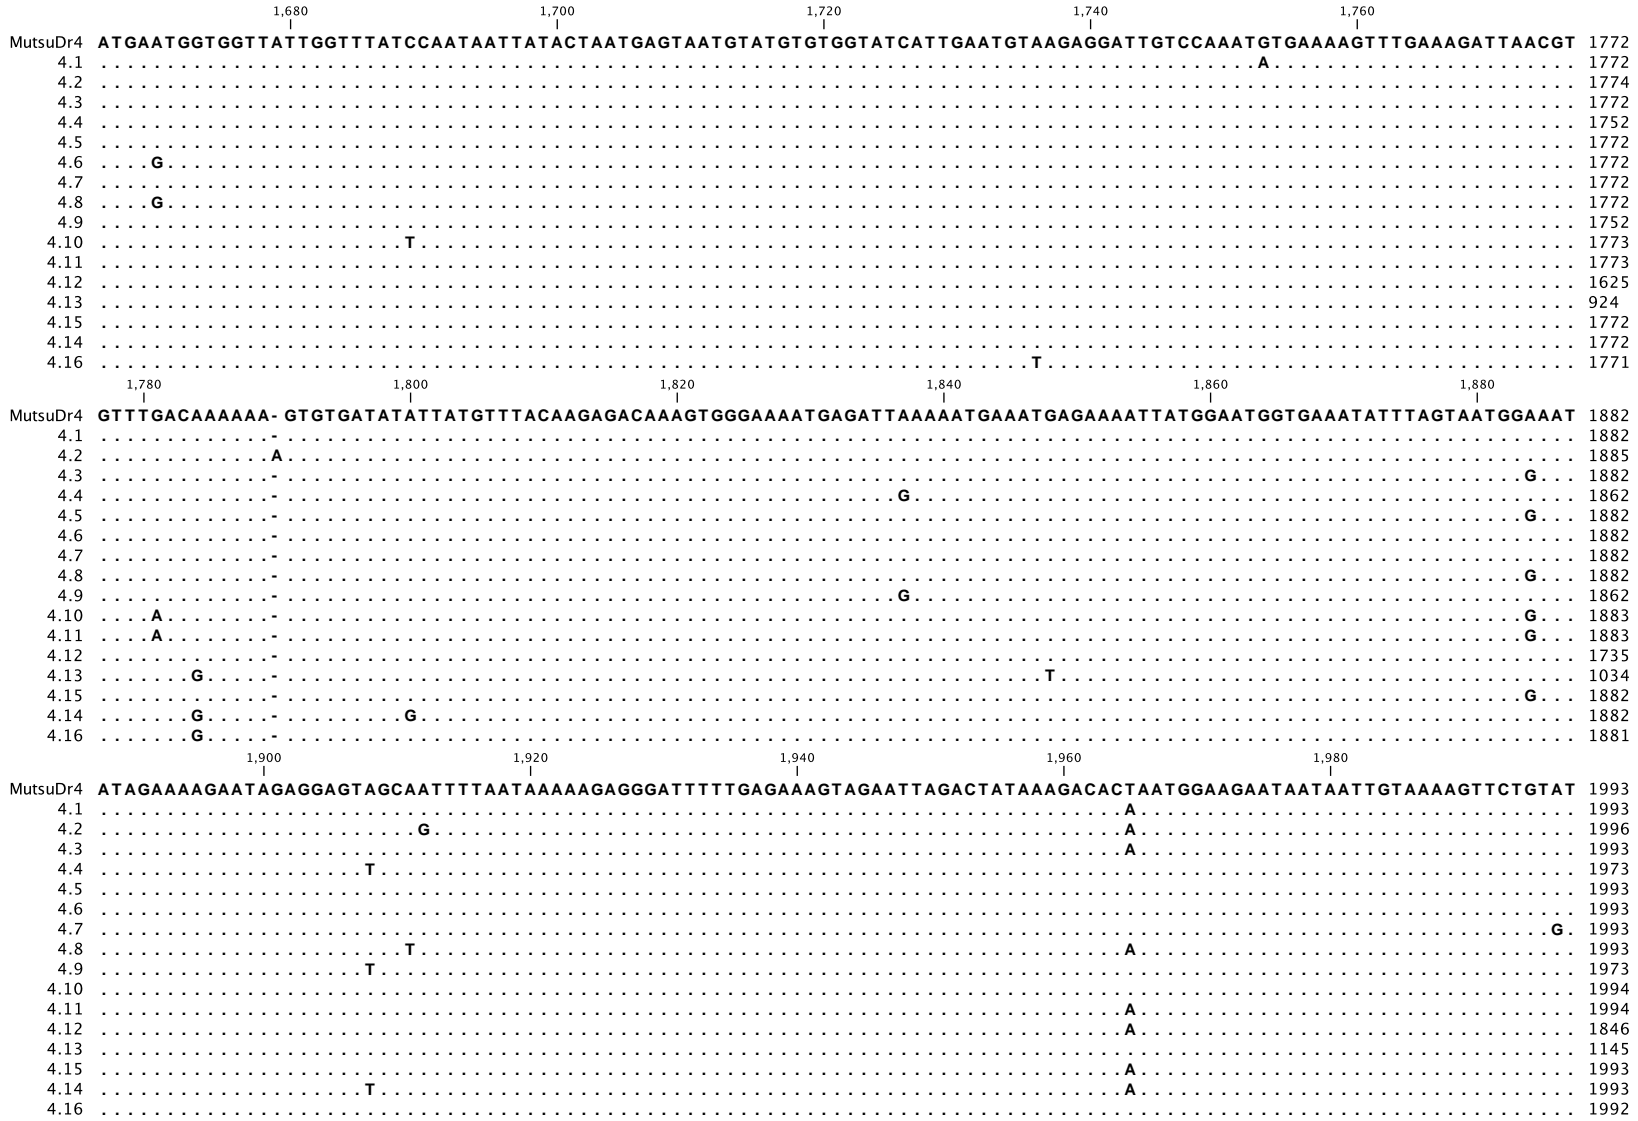

Supplemental Figure S9

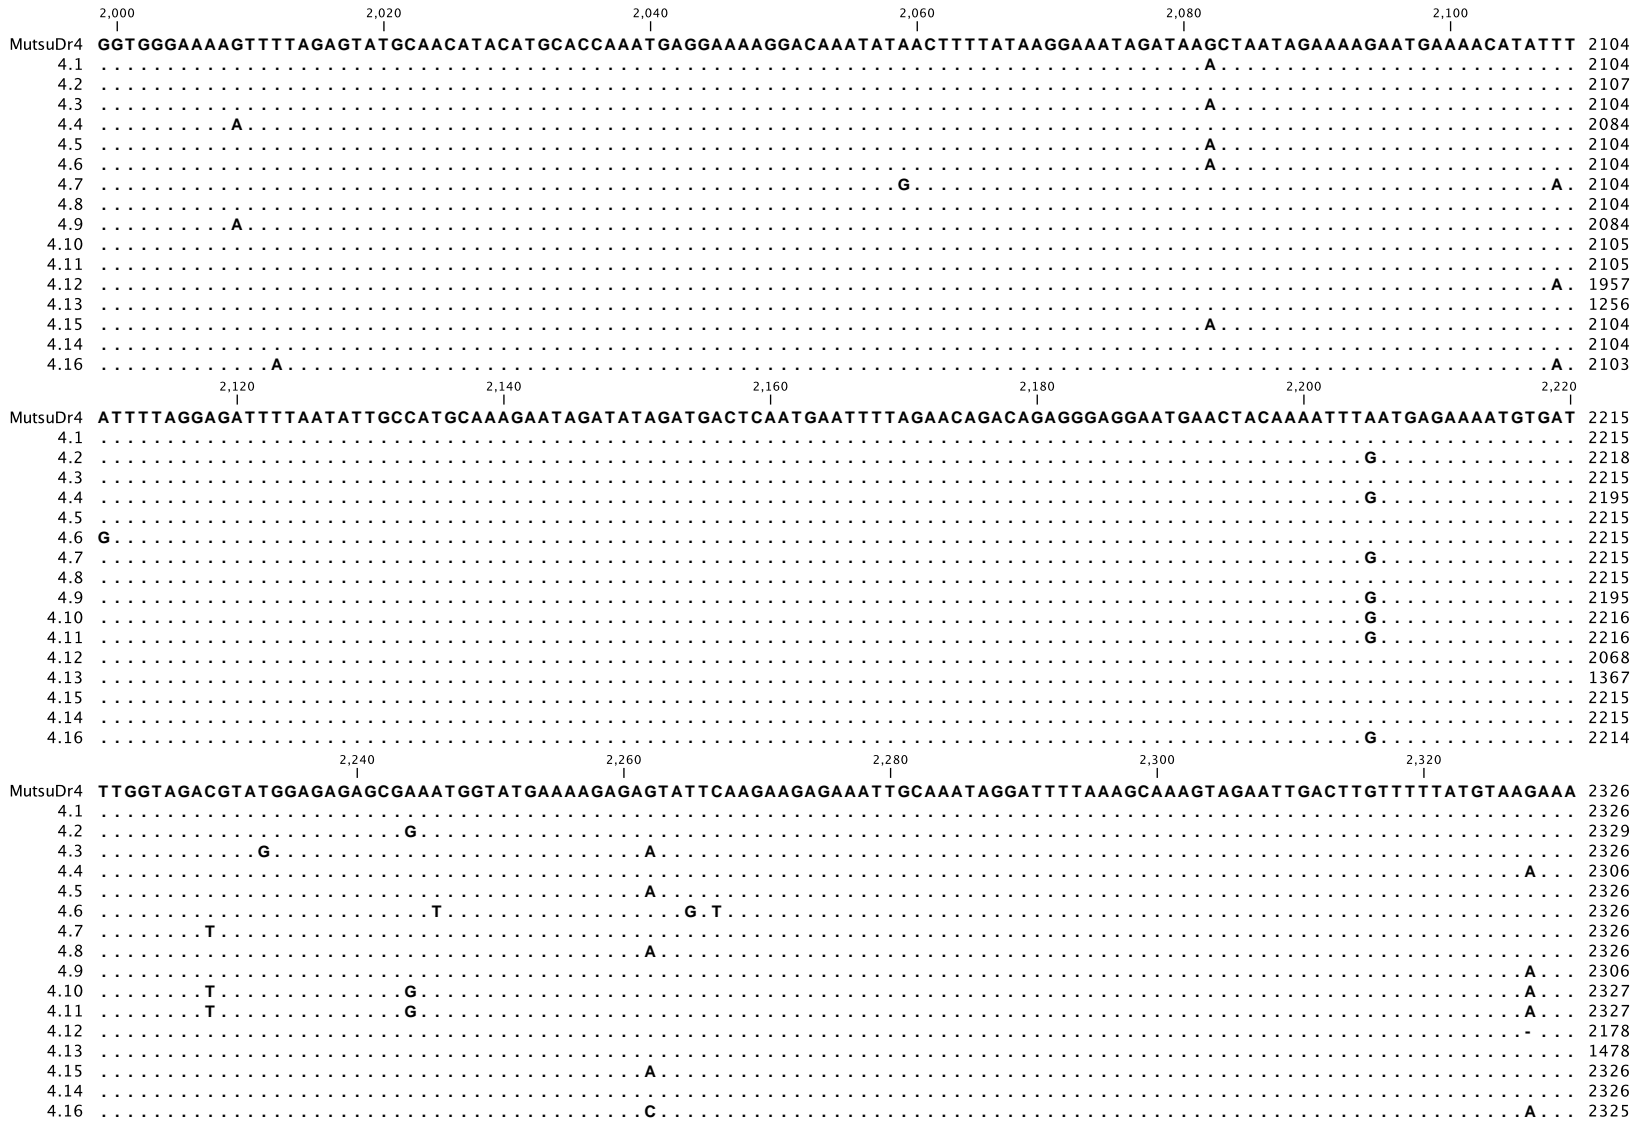





Supplemental Figure S9

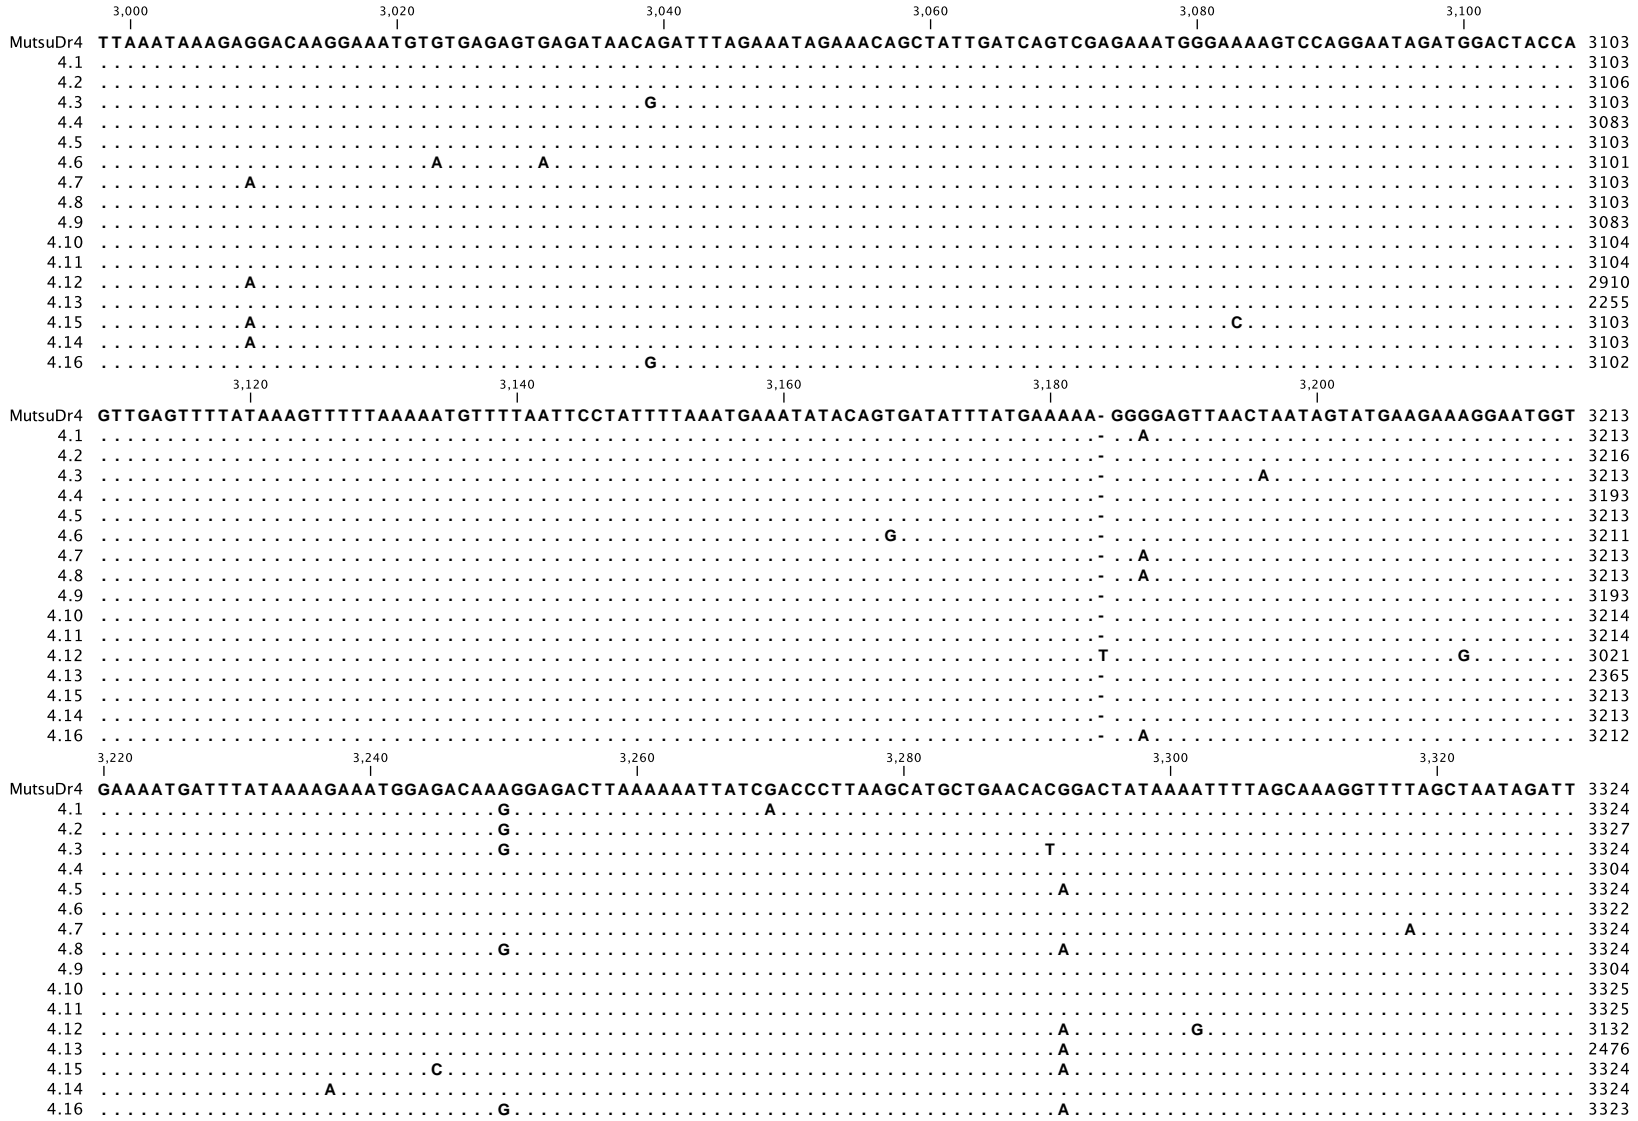

Supplemental Figure S9

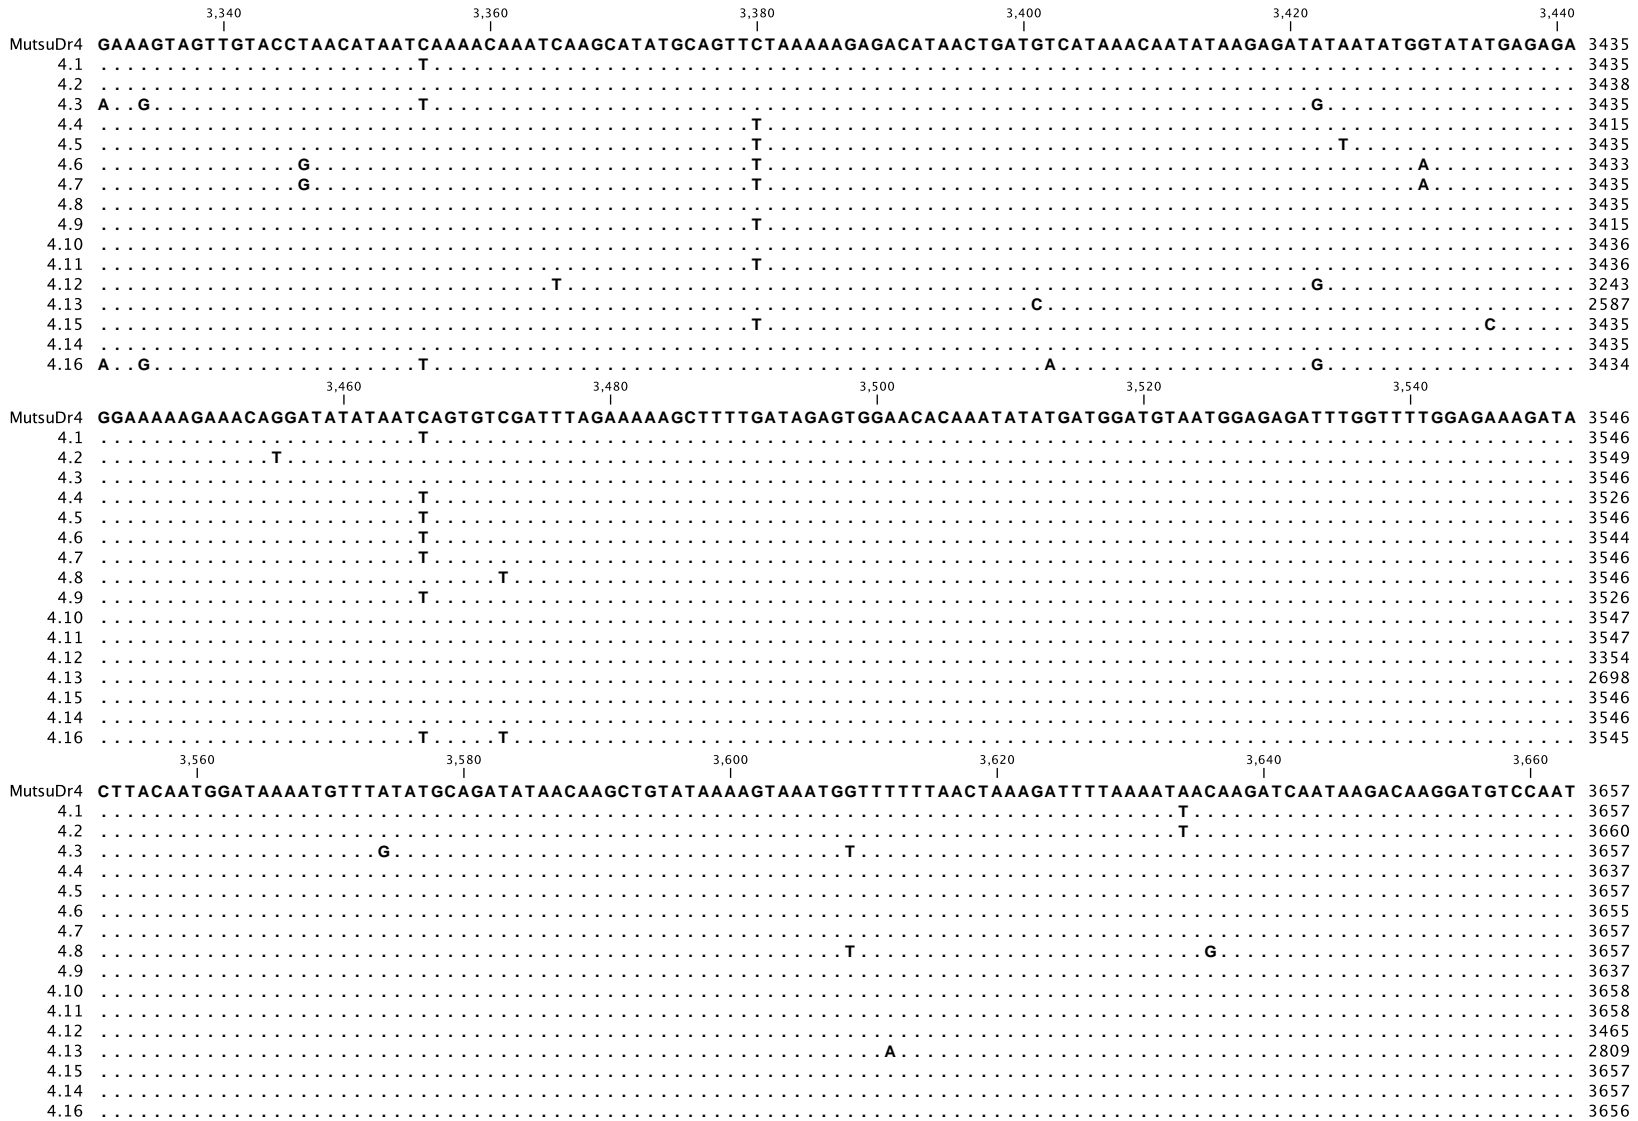

Supplemental Figure S9

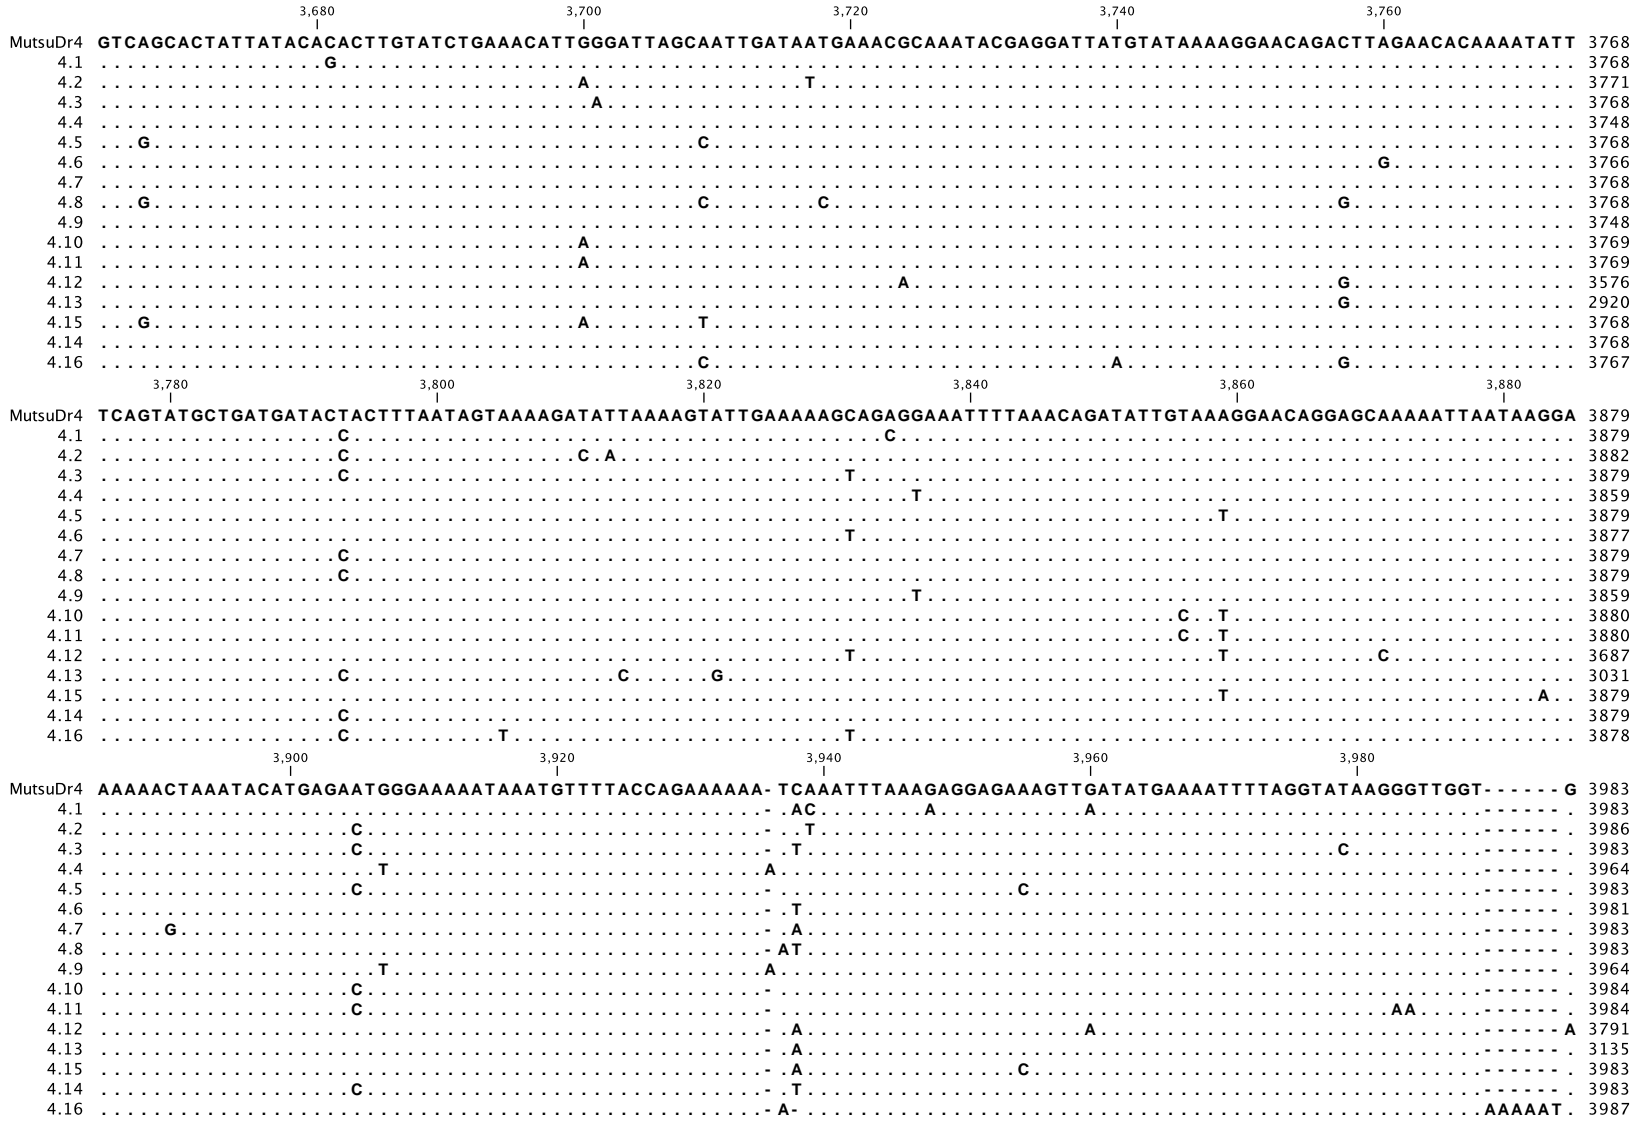





Supplemental Figure S9

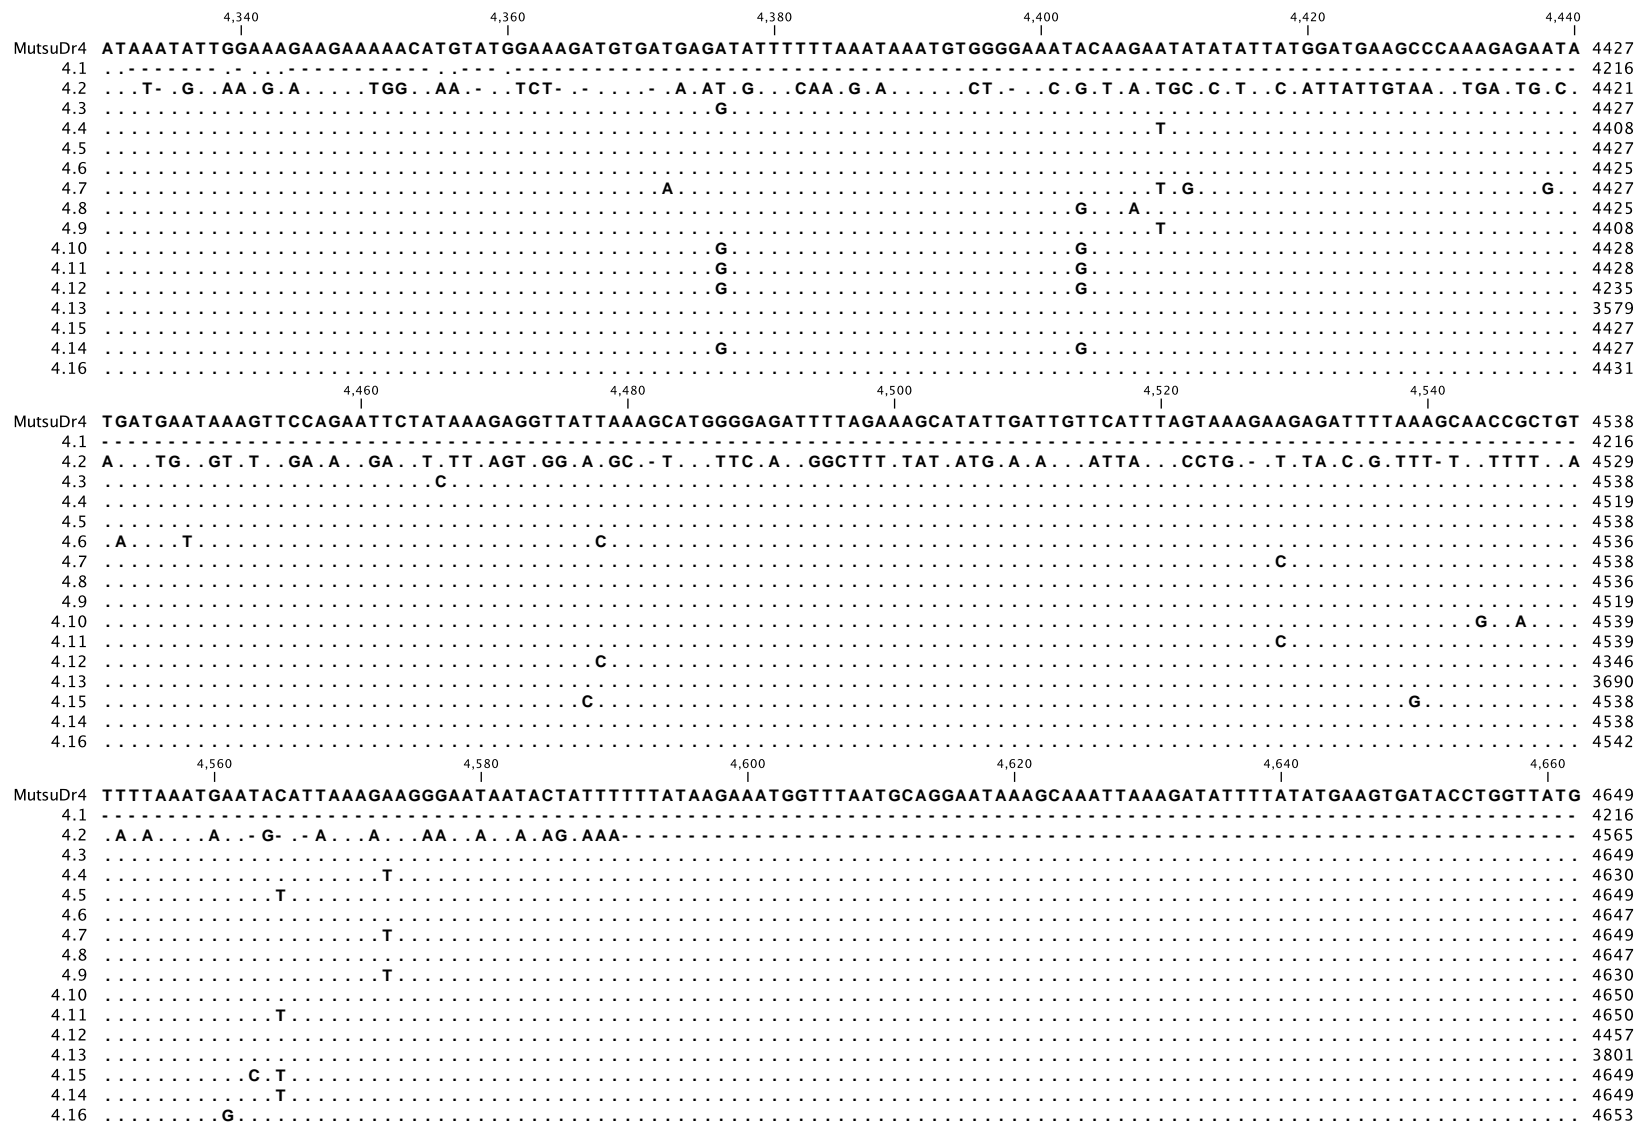

Supplemental Figure S9

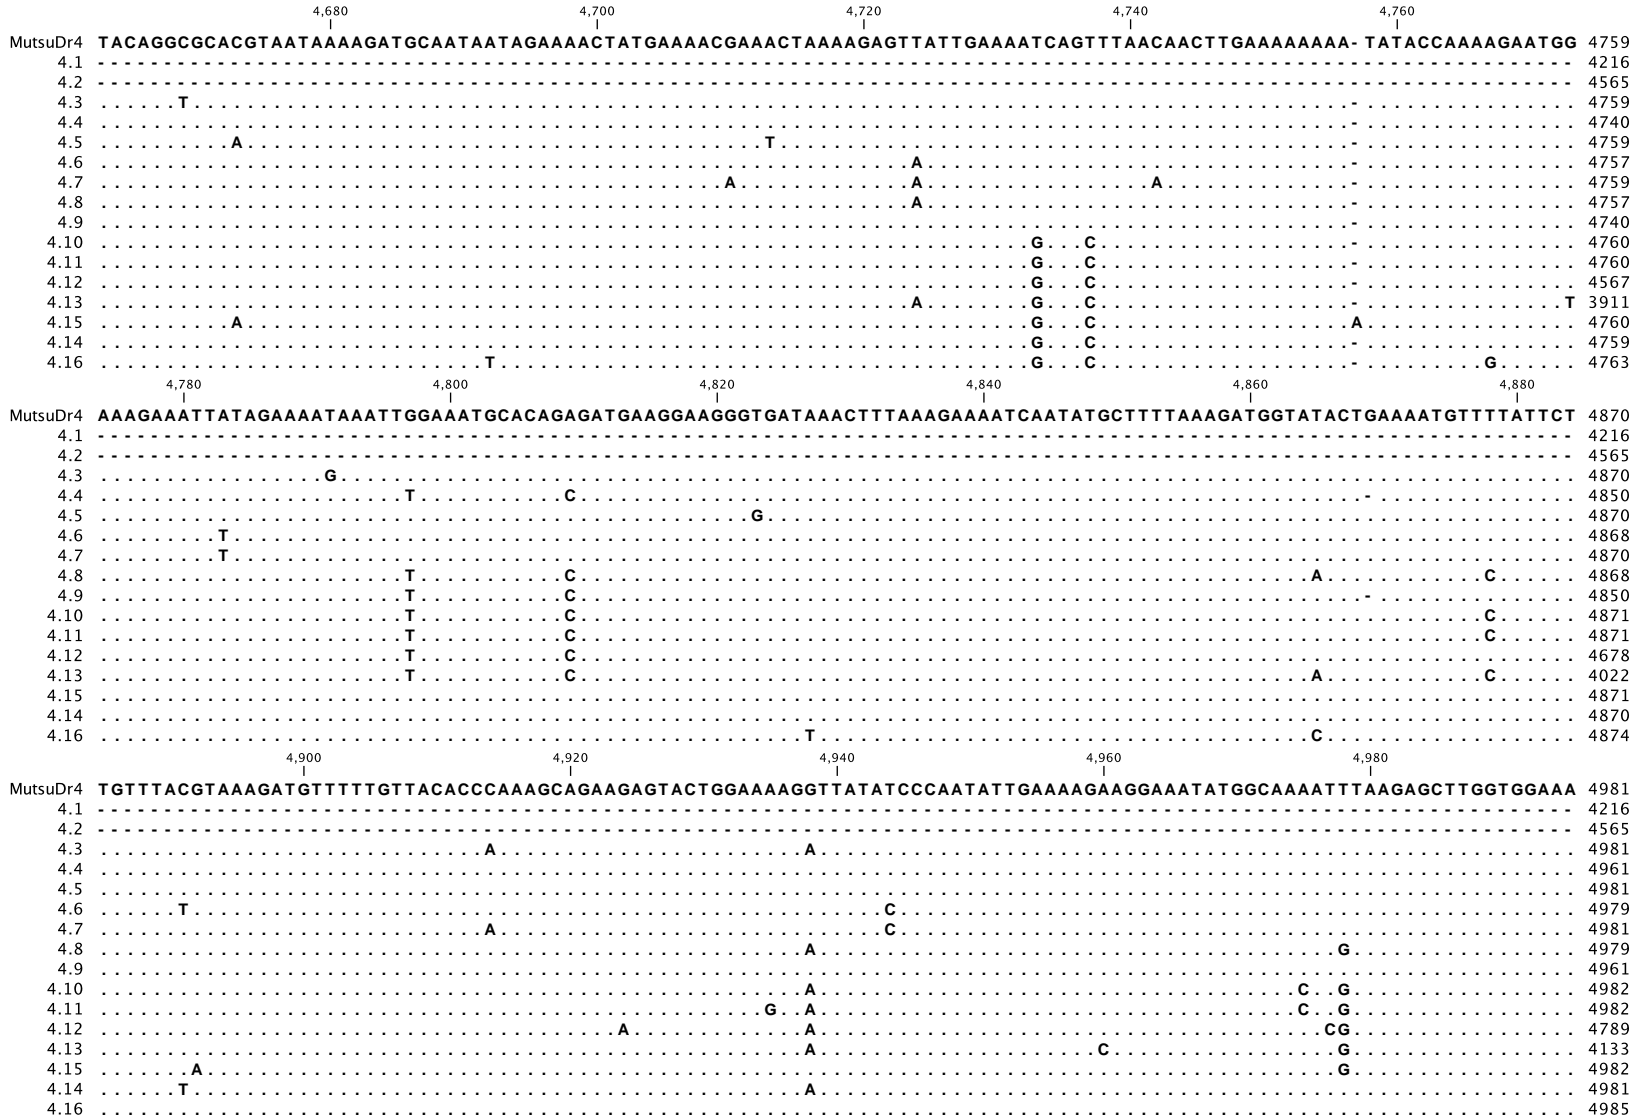

Supplemental Figure S9

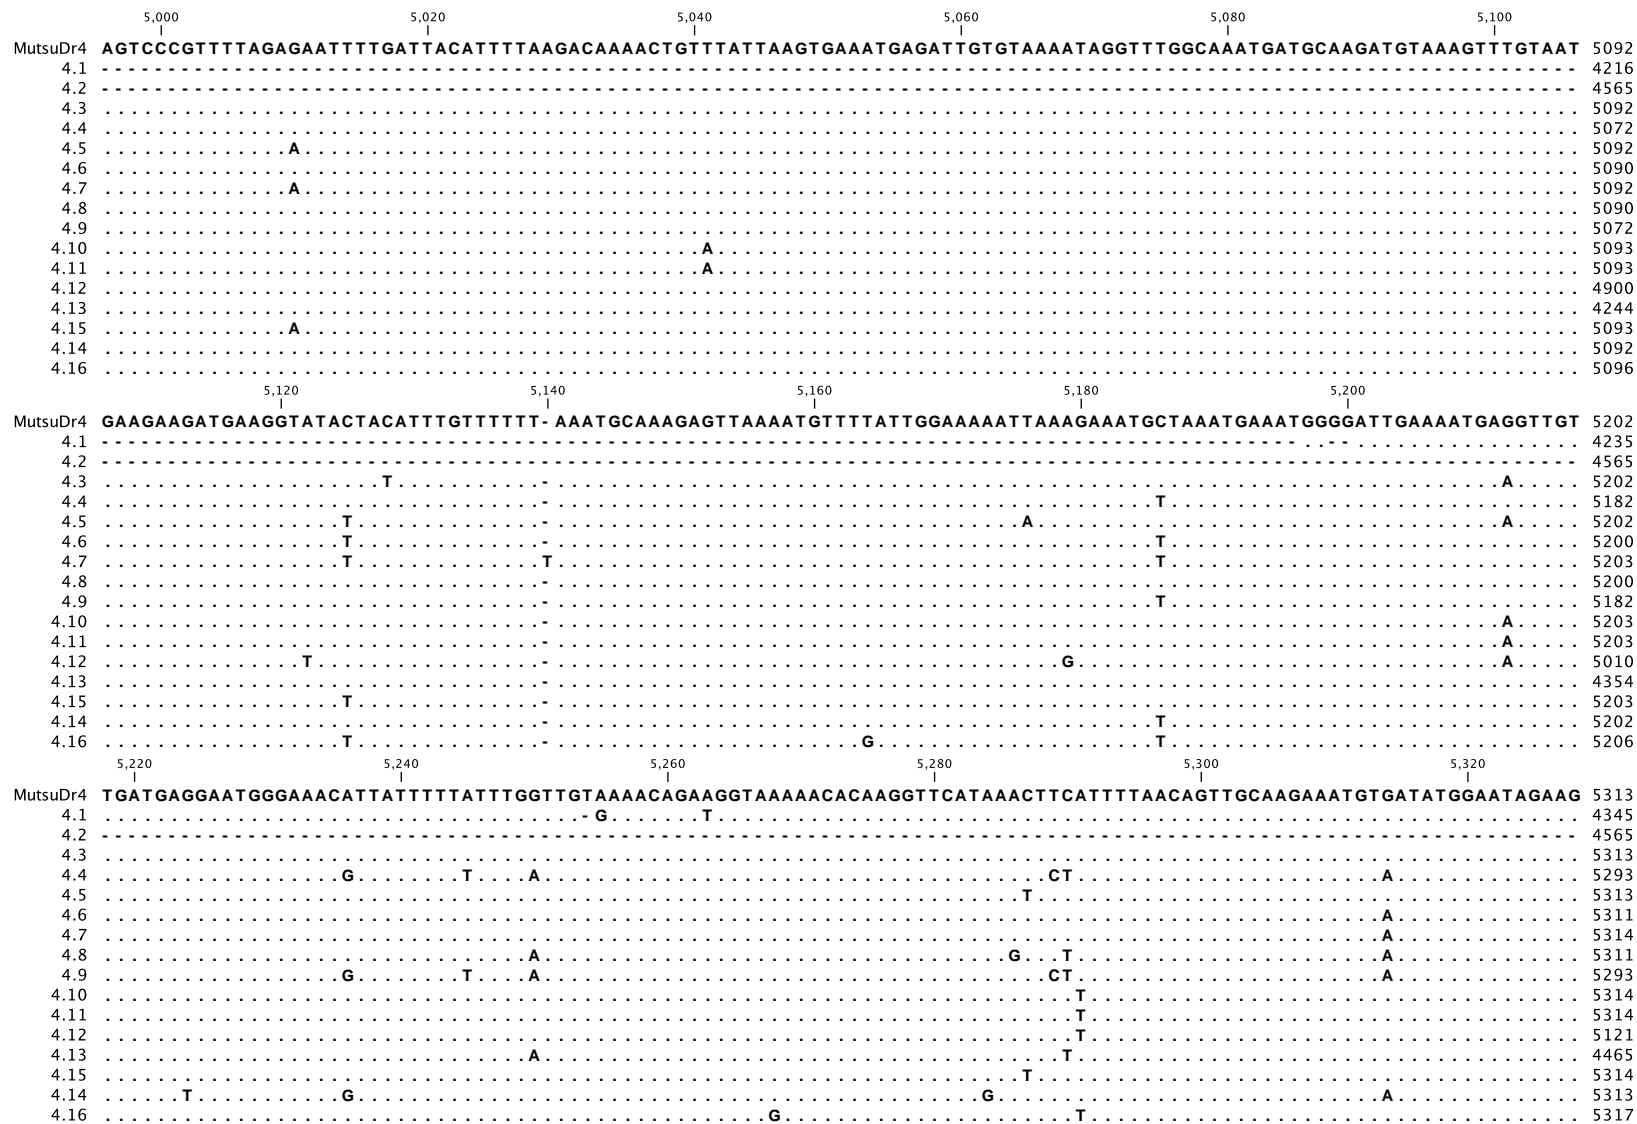

Supplemental Figure S9

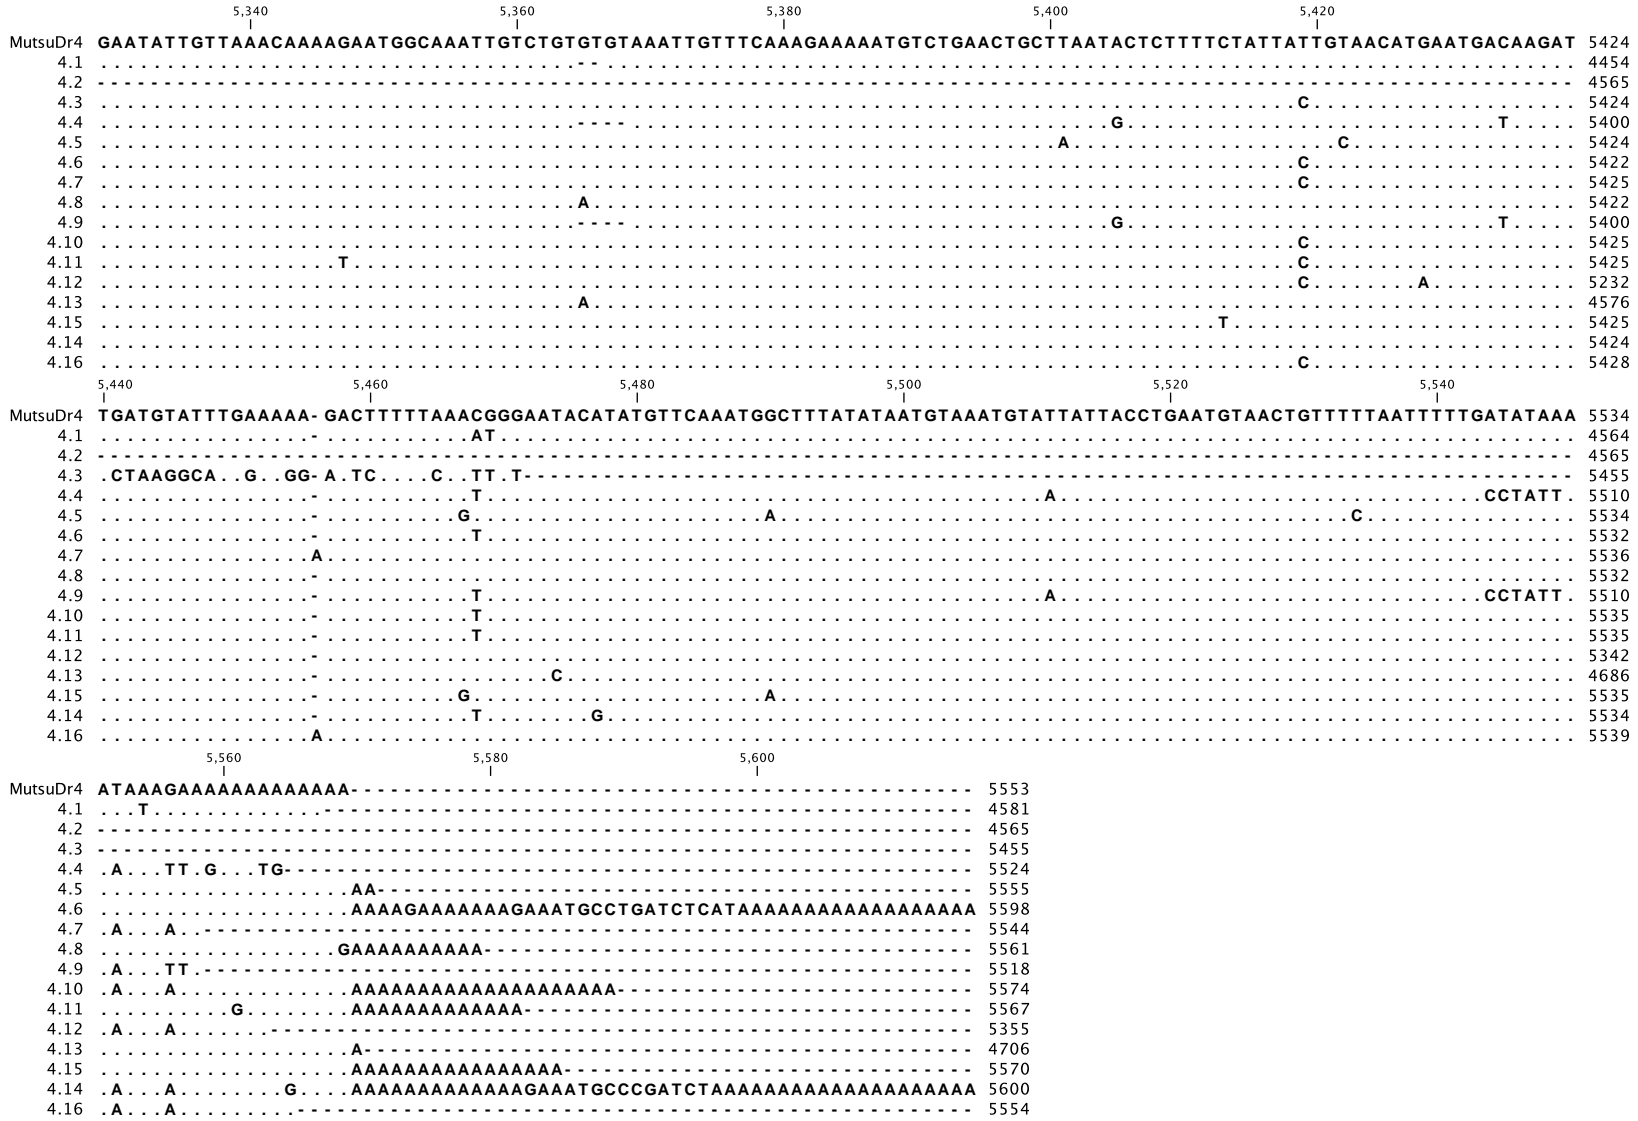



Supplemental Figure S9

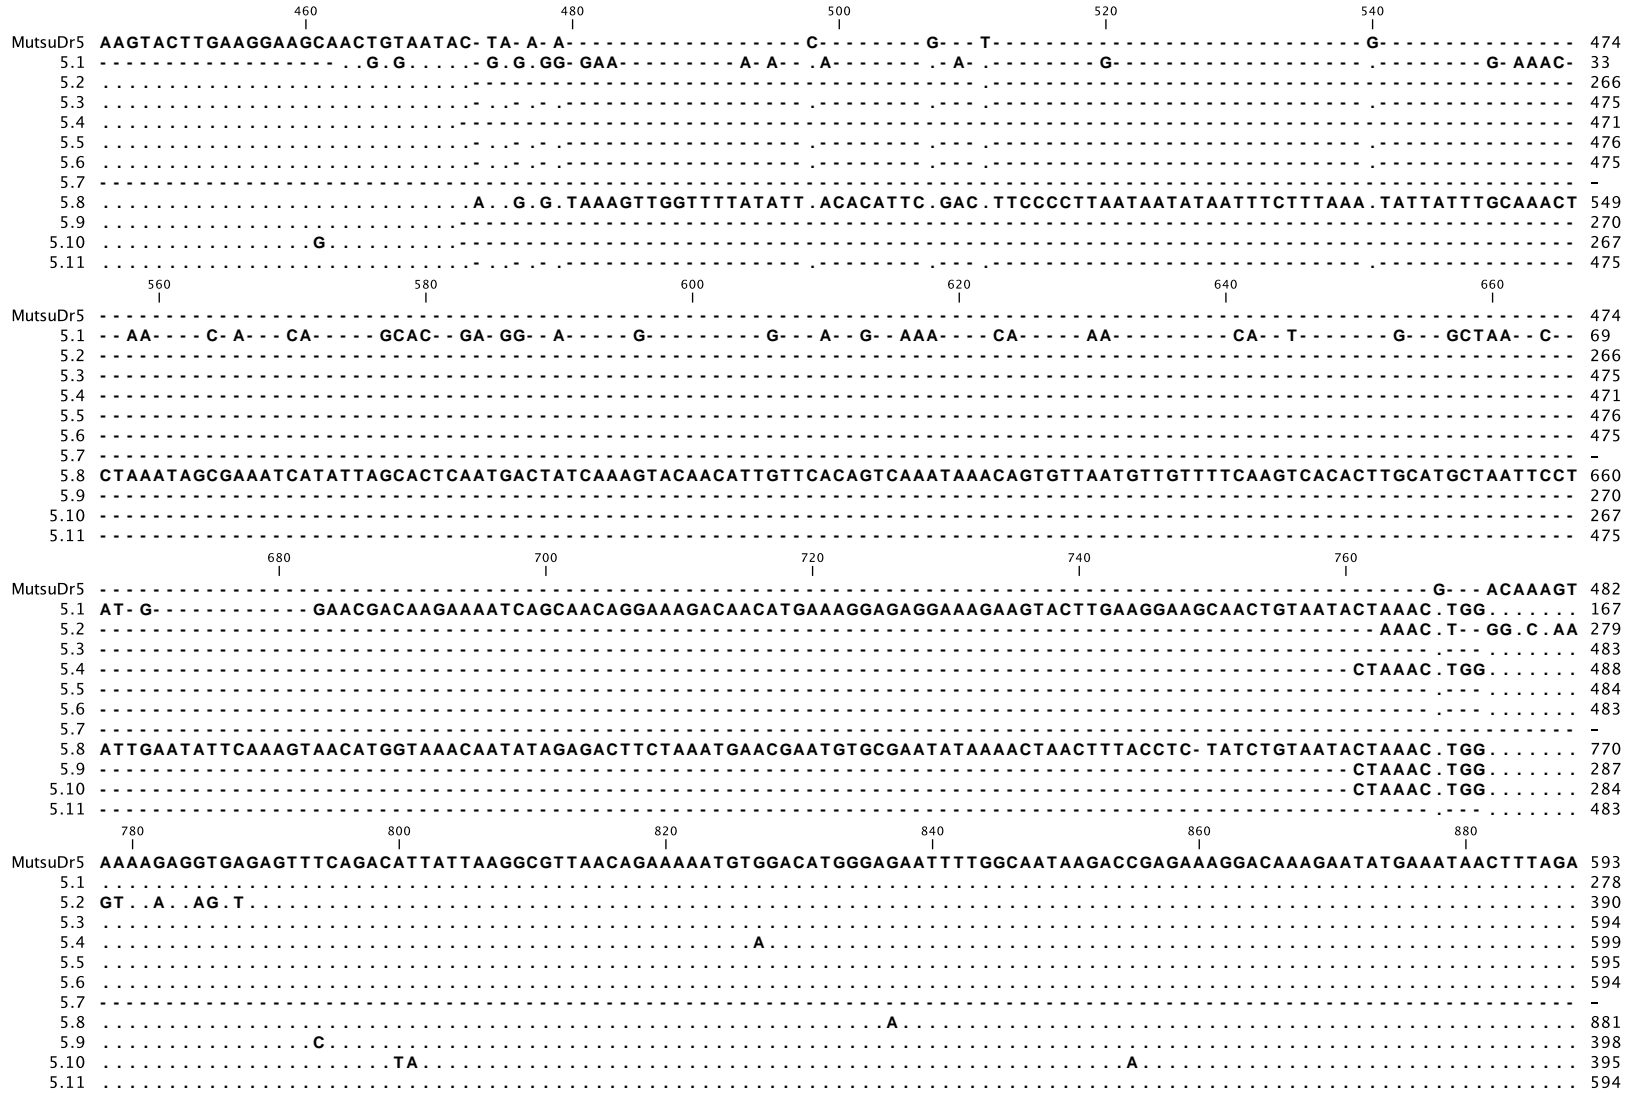

Supplemental Figure S9

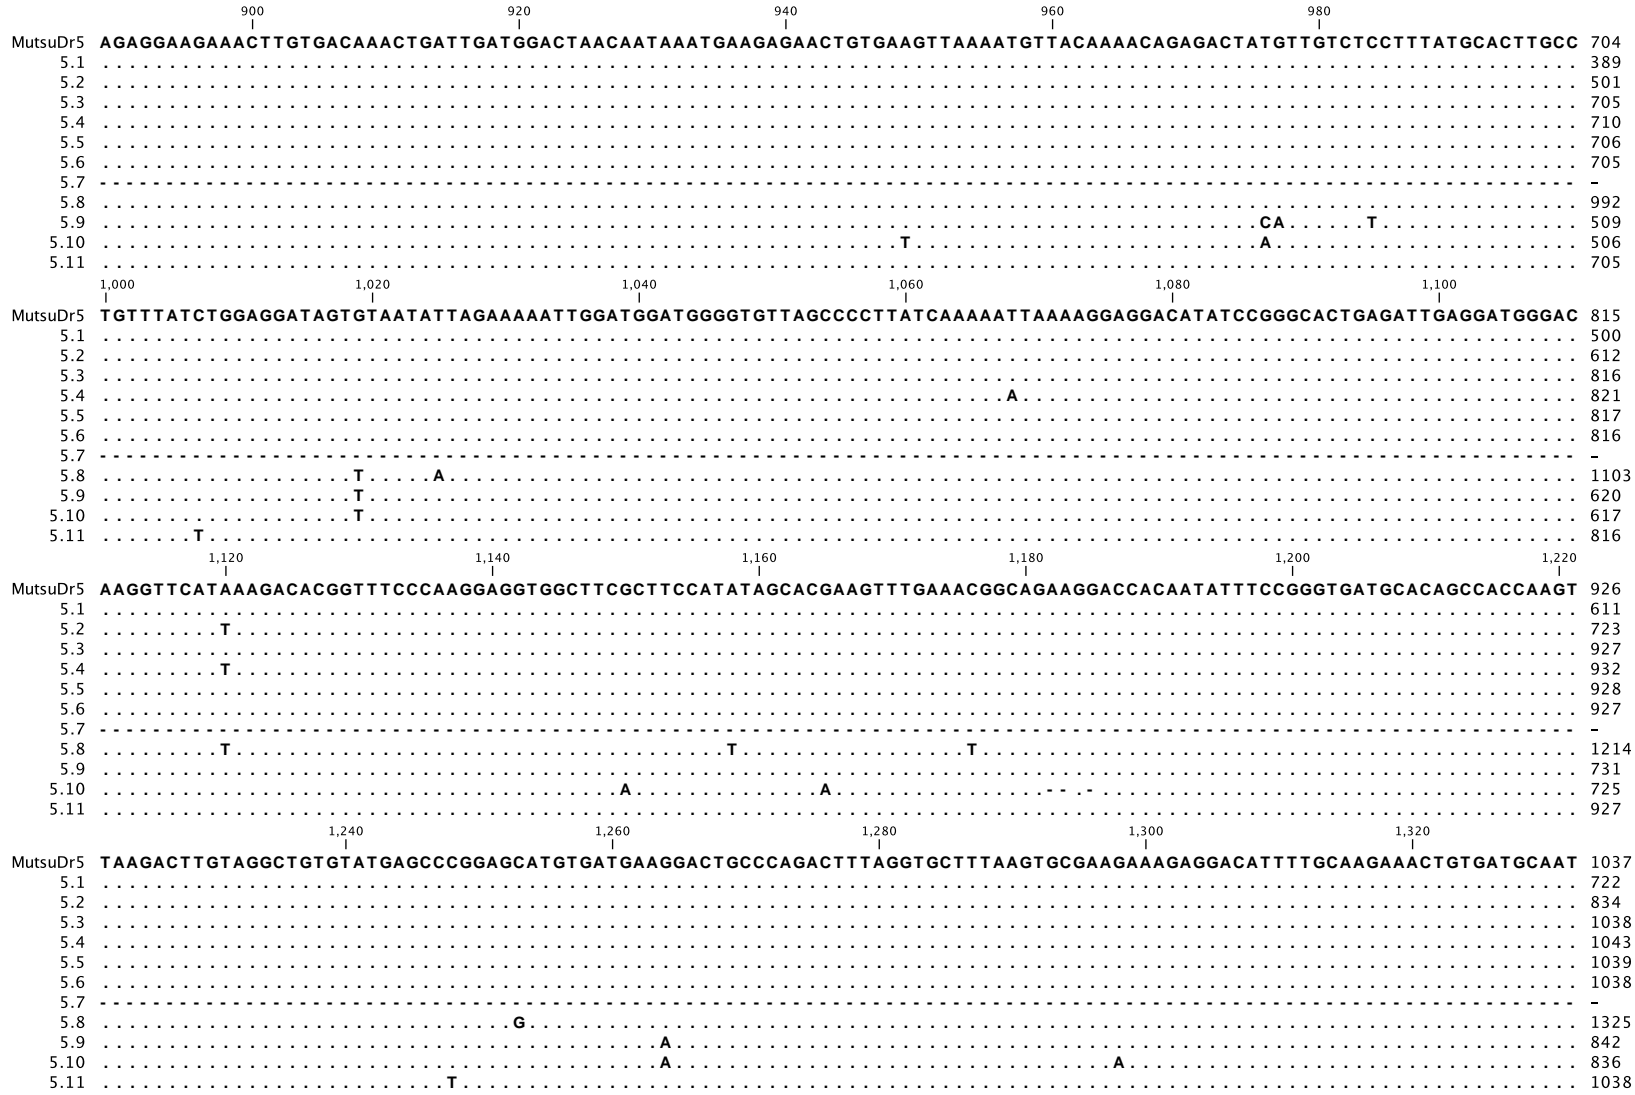

Supplemental Figure S9

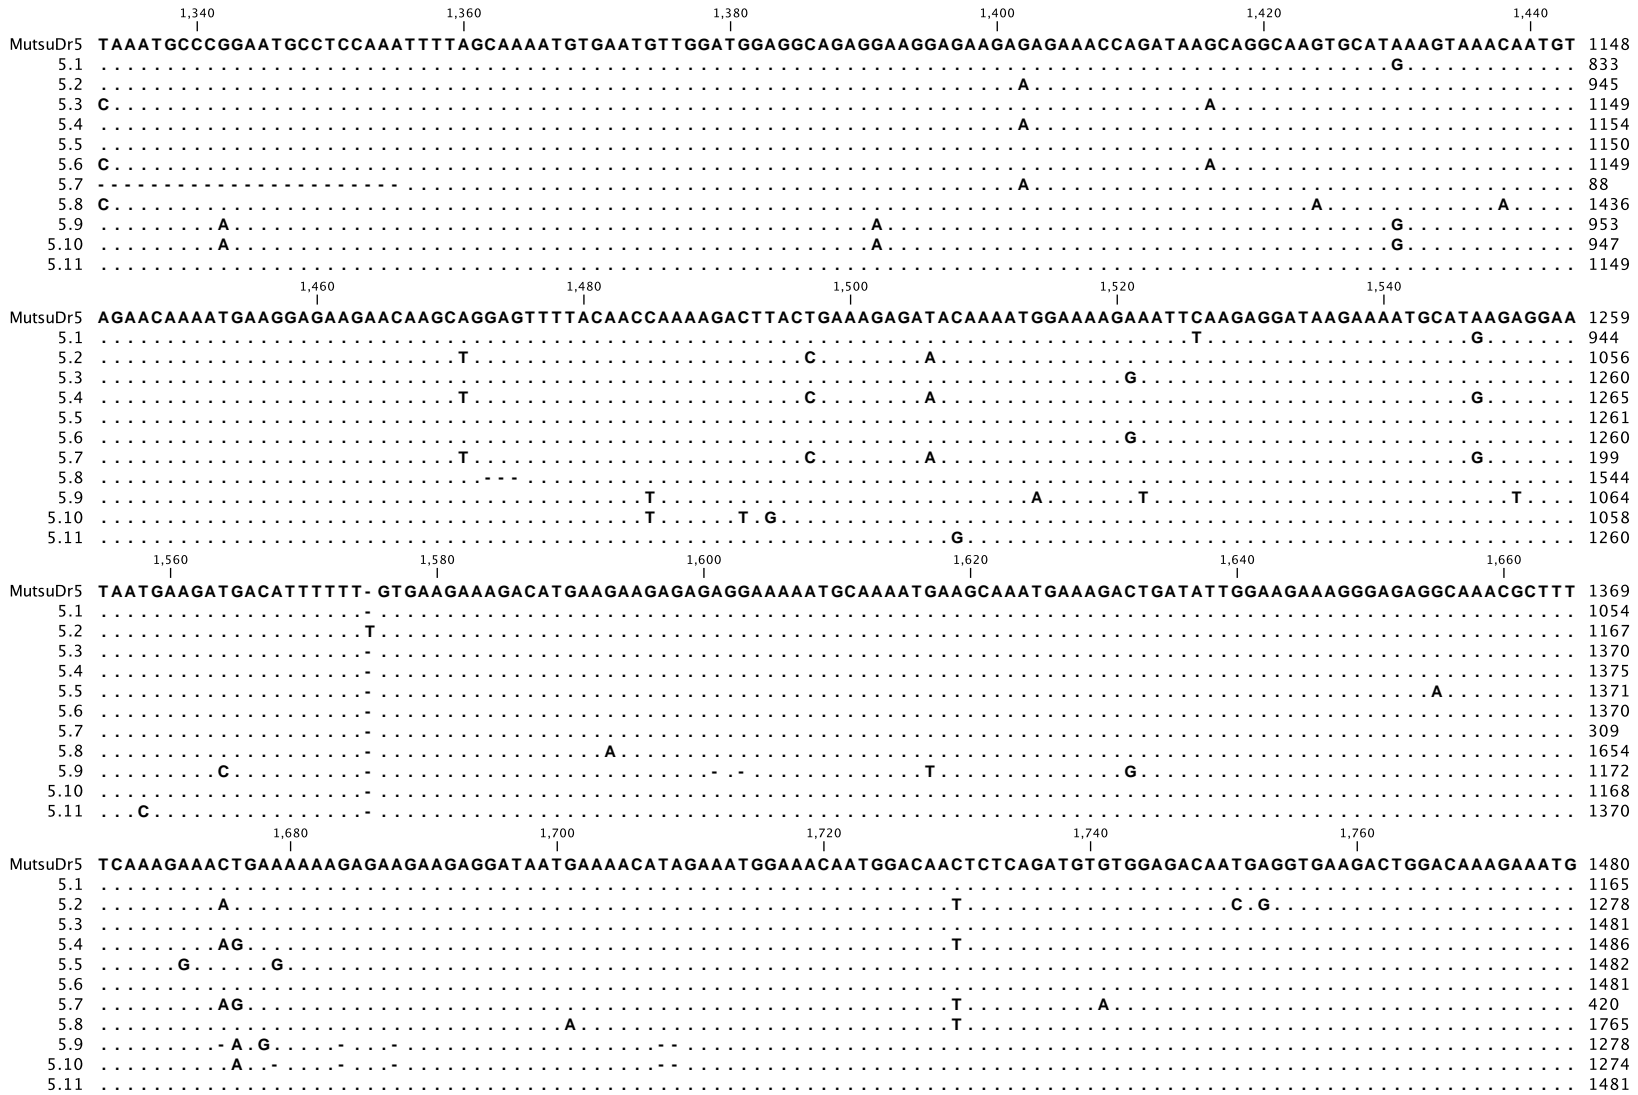



Supplemental Figure S9

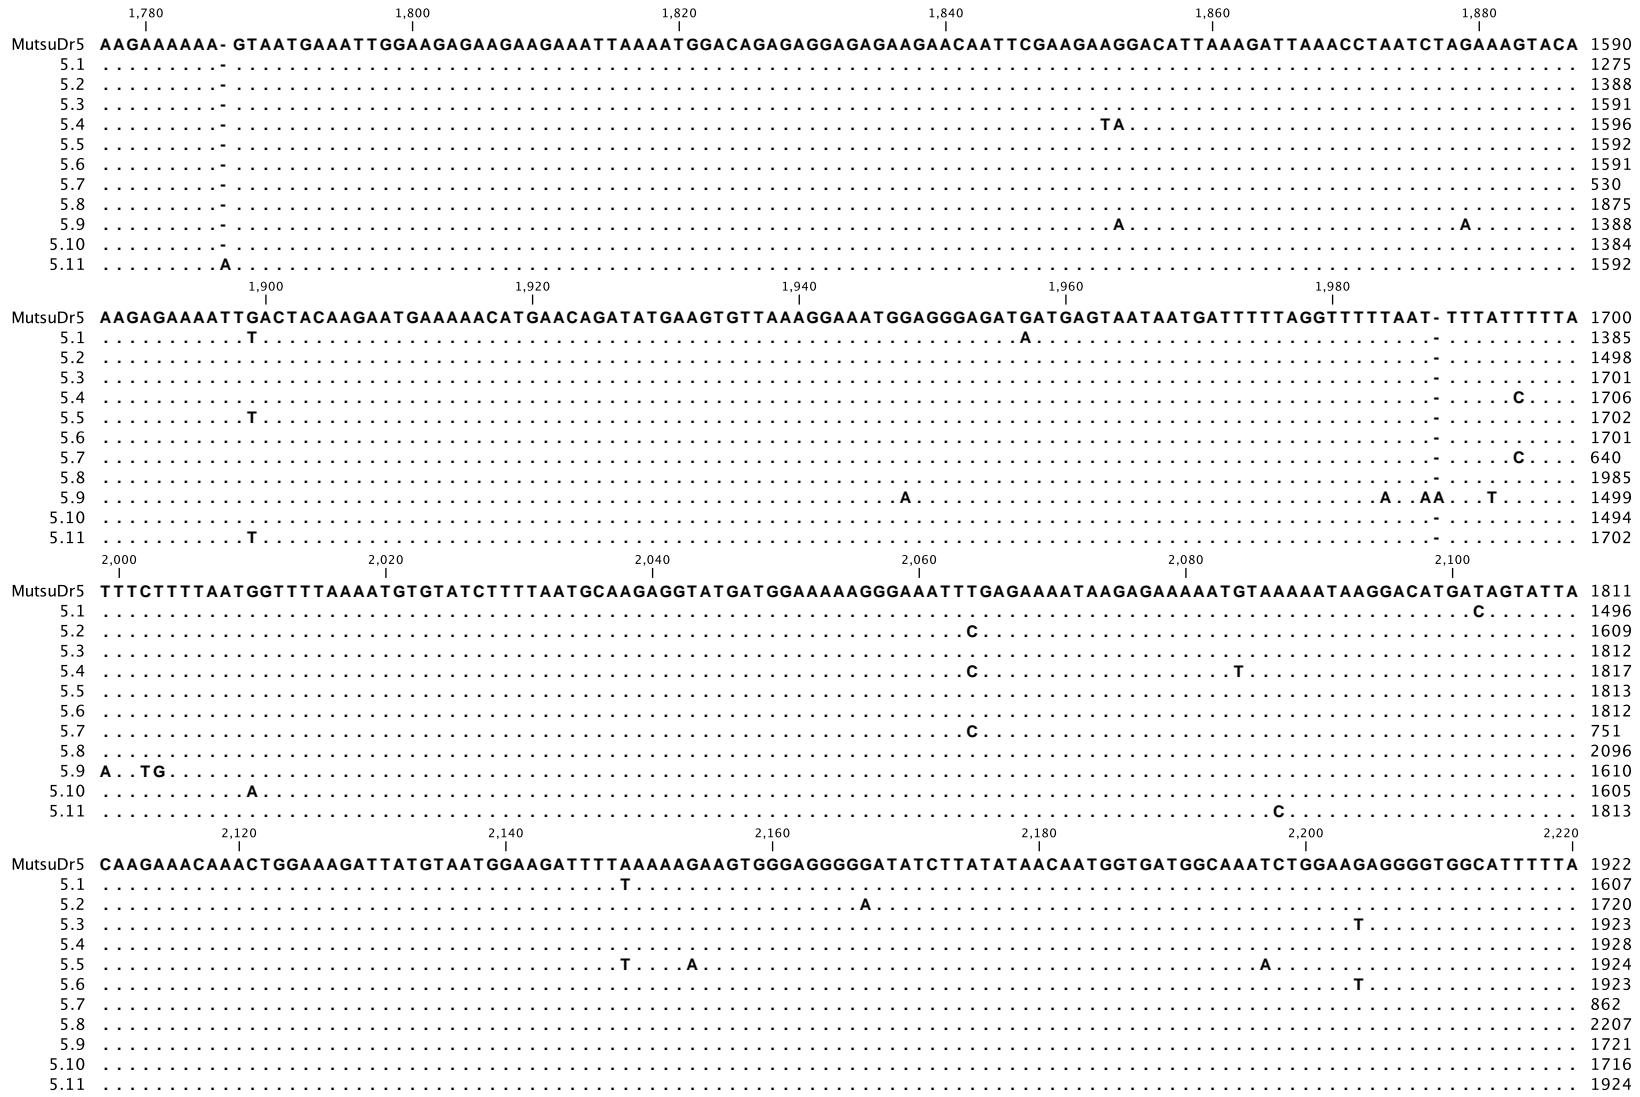

Supplemental Figure S9

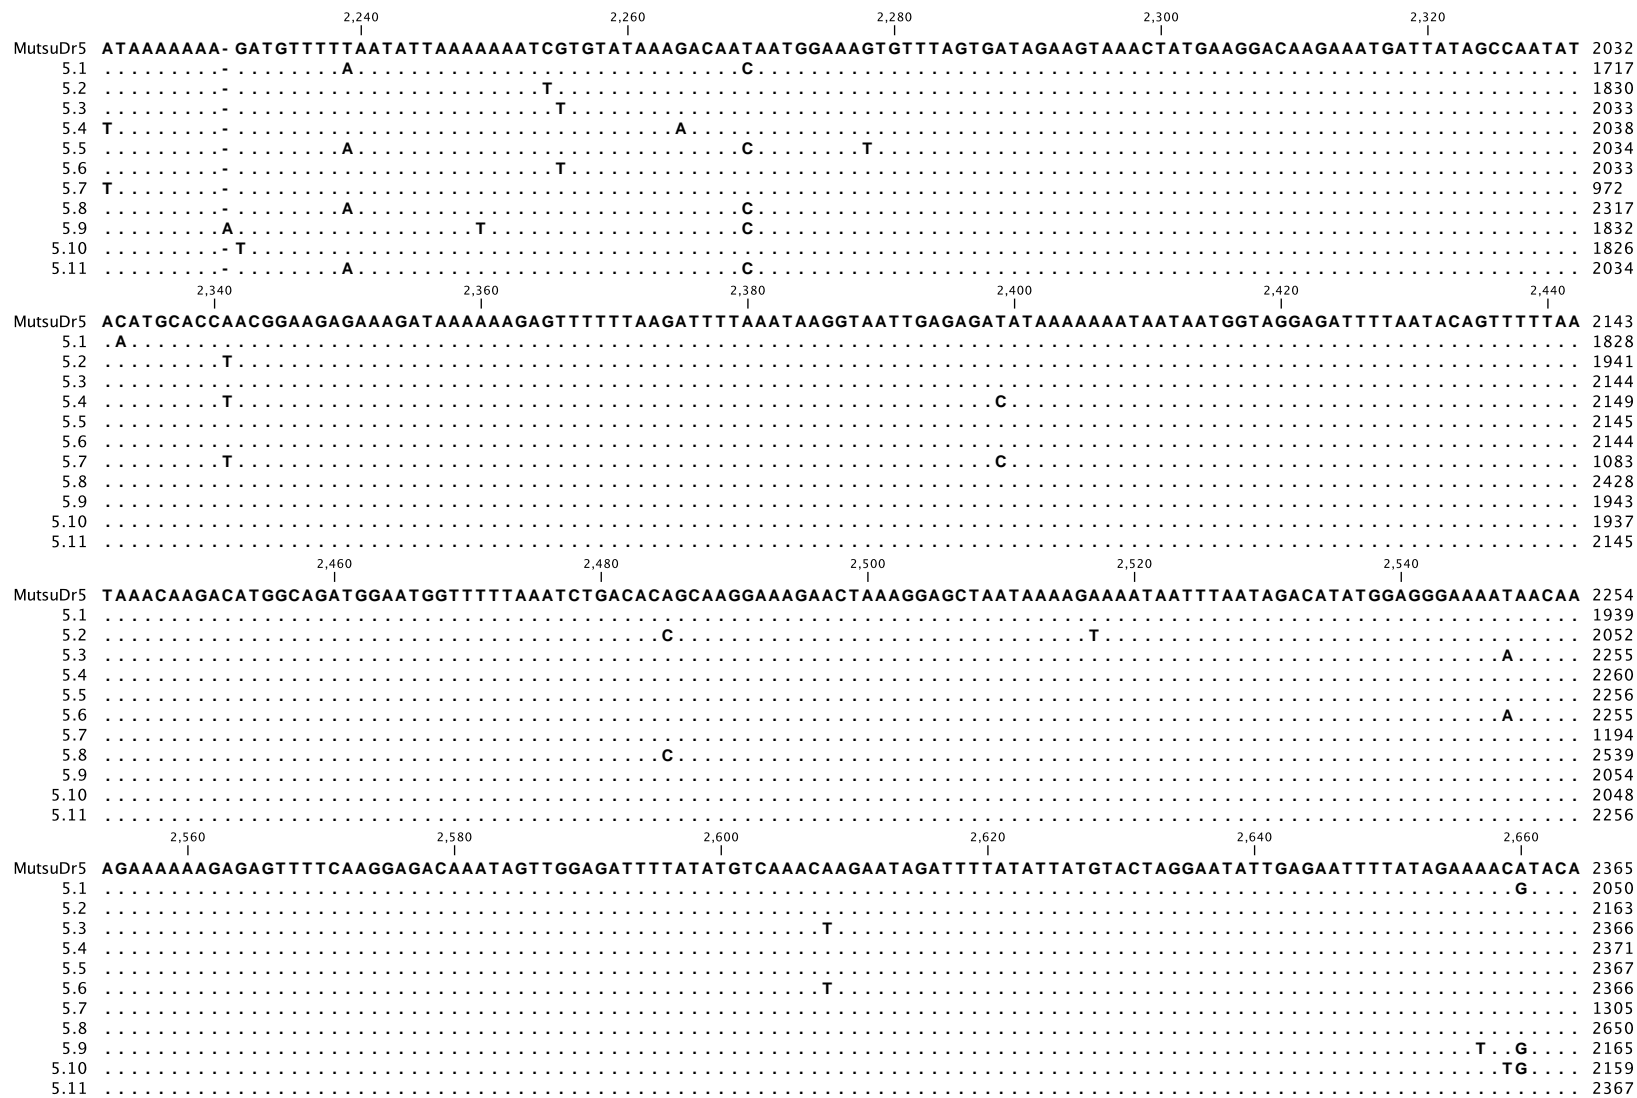

Supplemental Figure S9

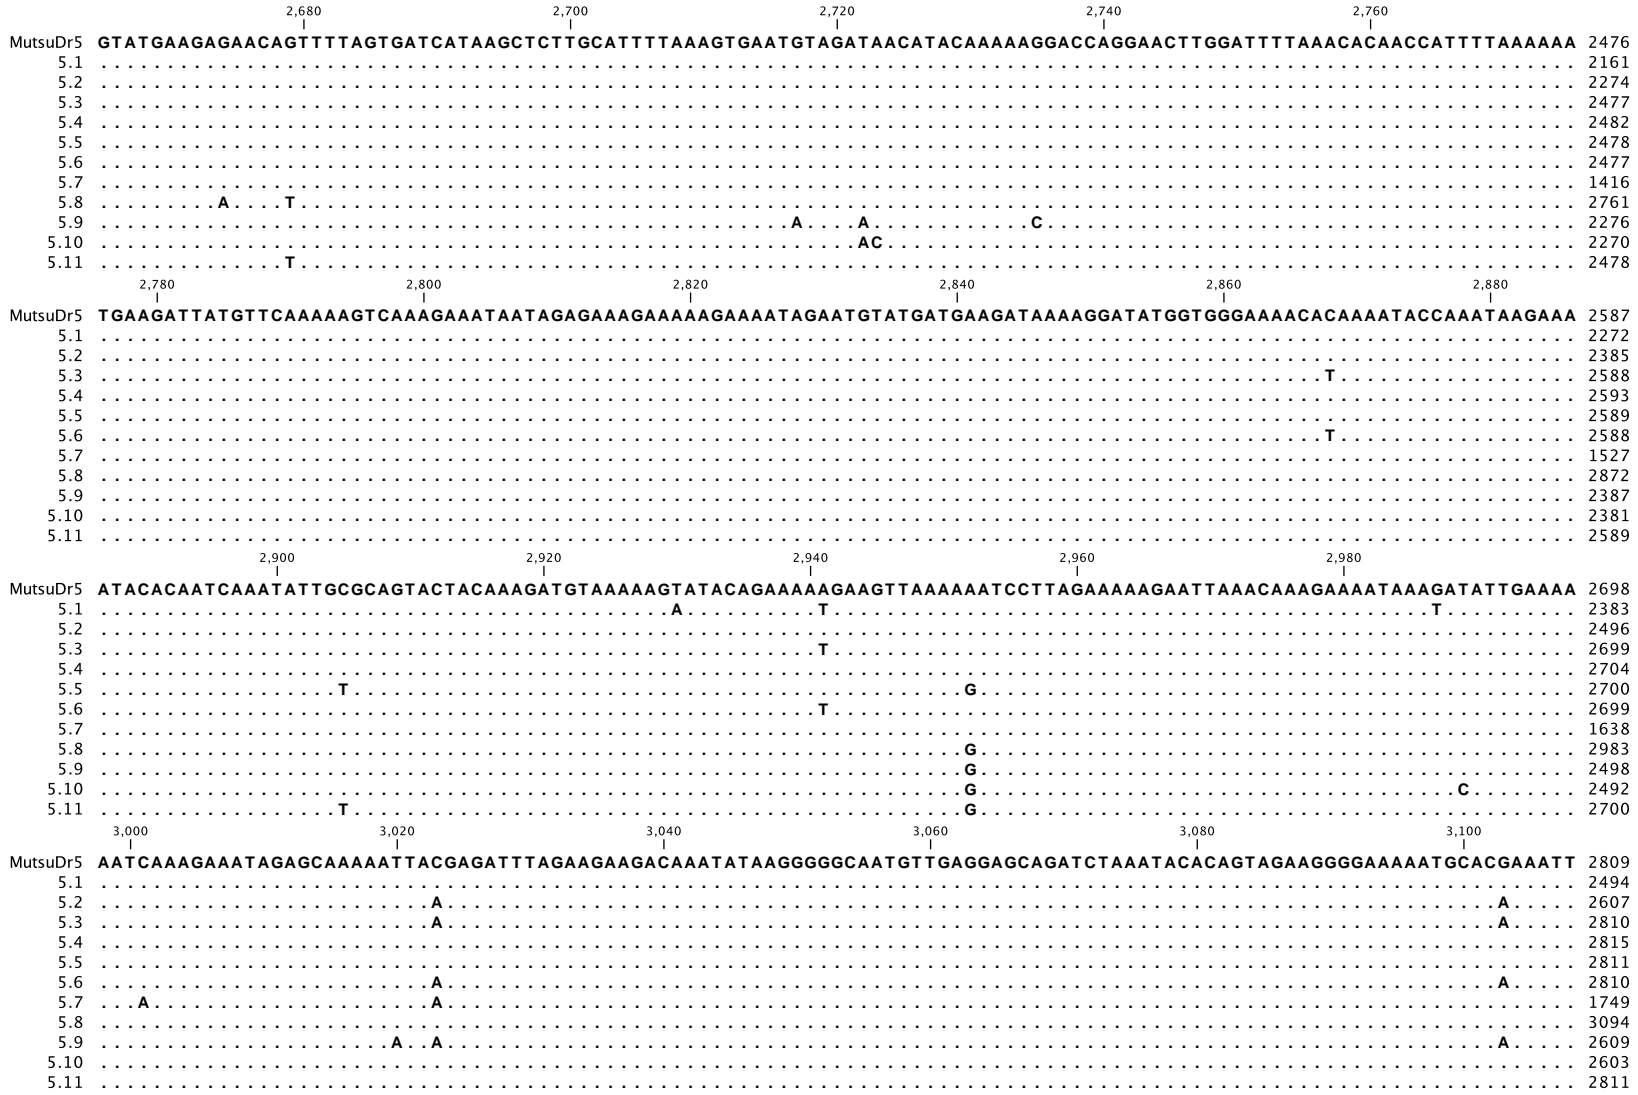

Supplemental Figure S9

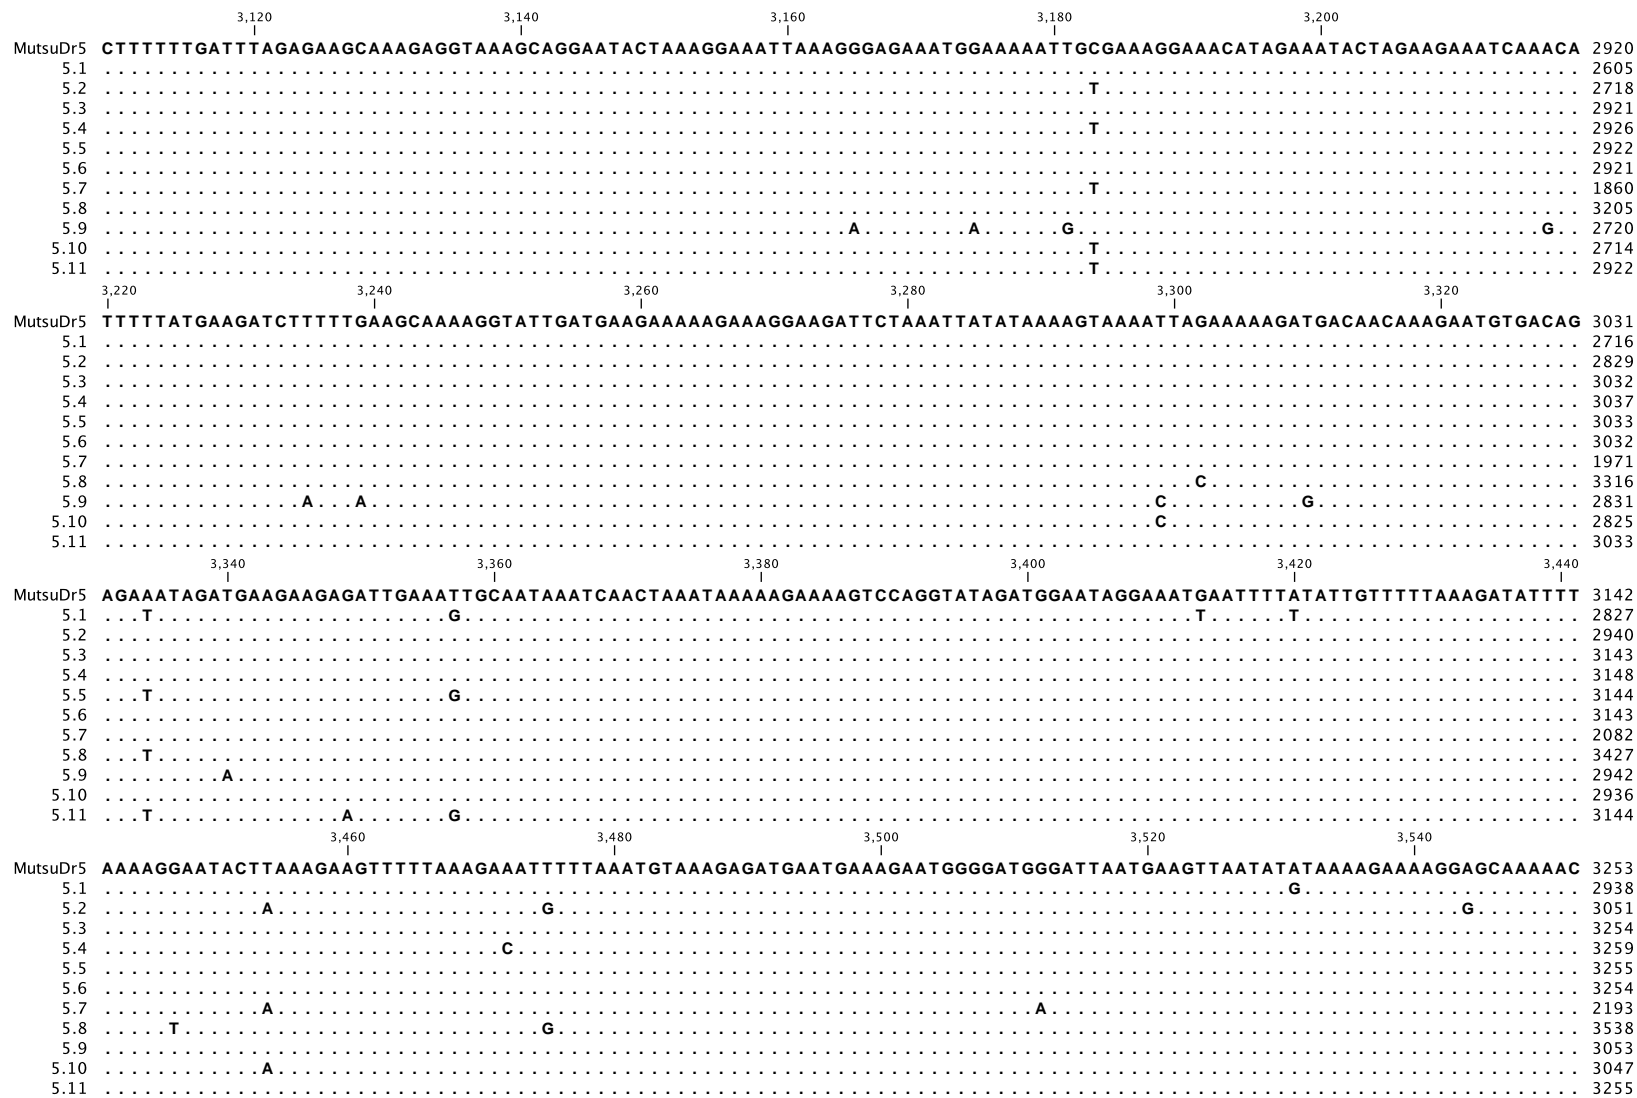

Supplemental Figure S9

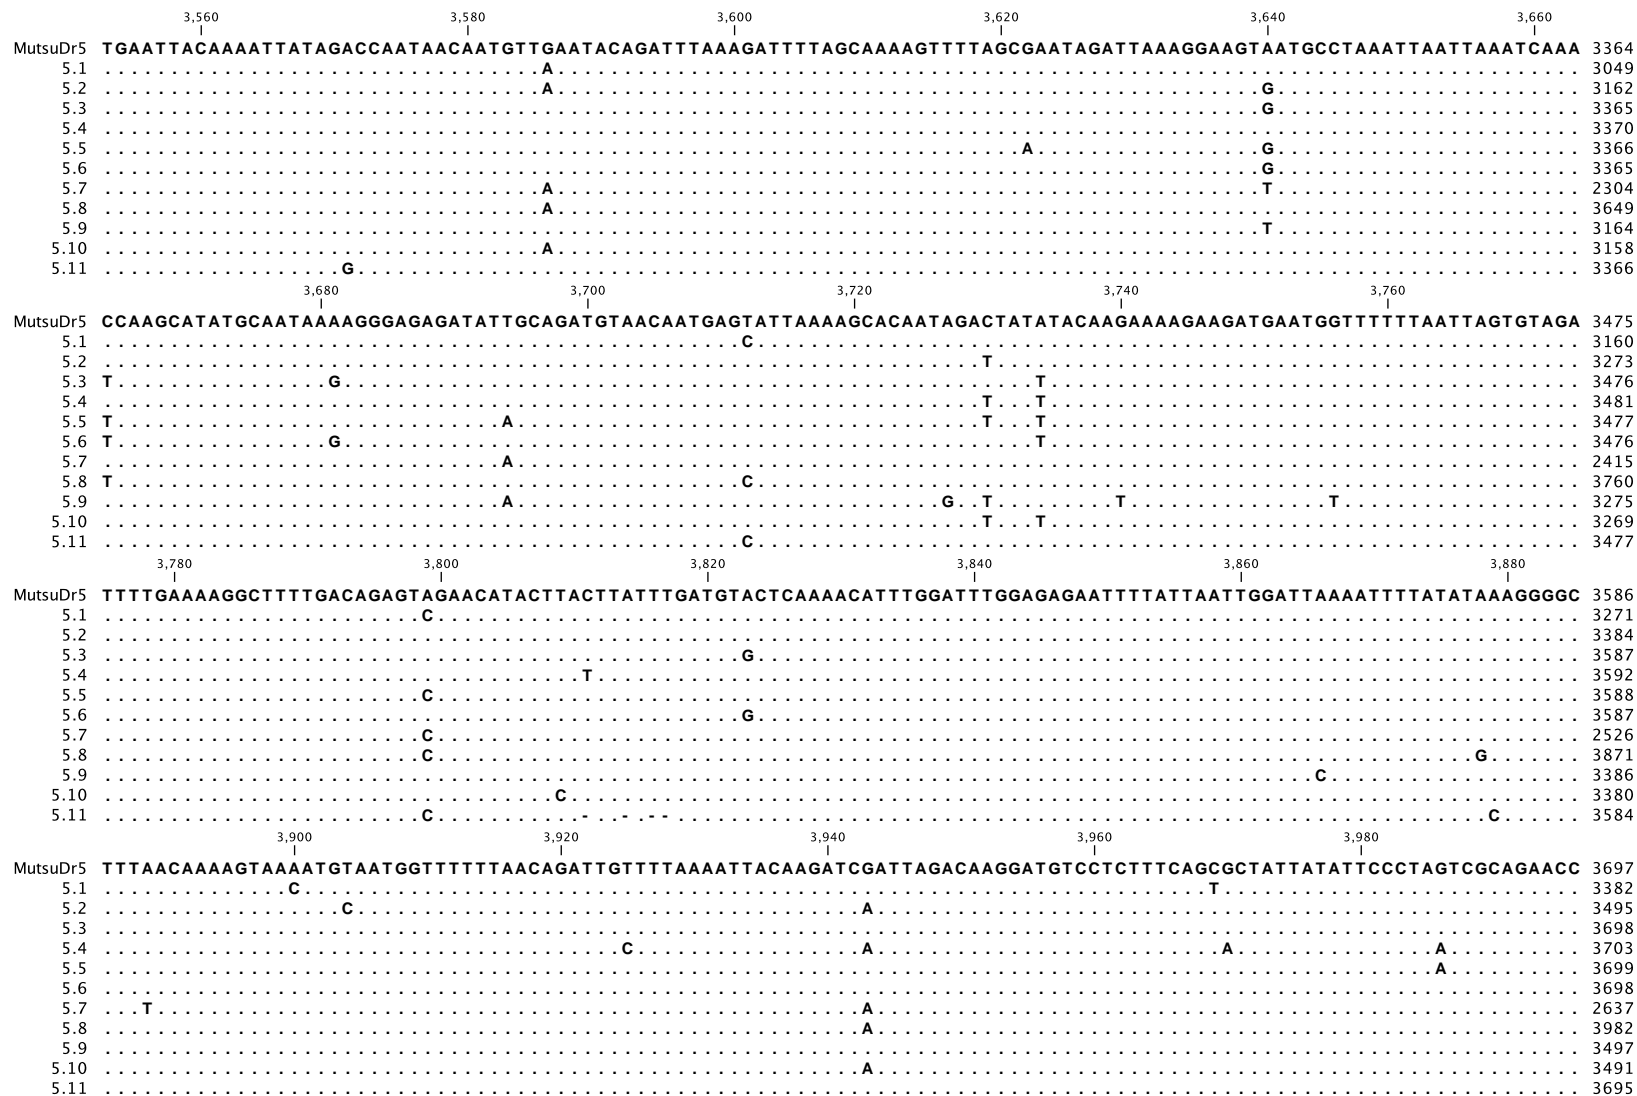

Supplemental Figure S9

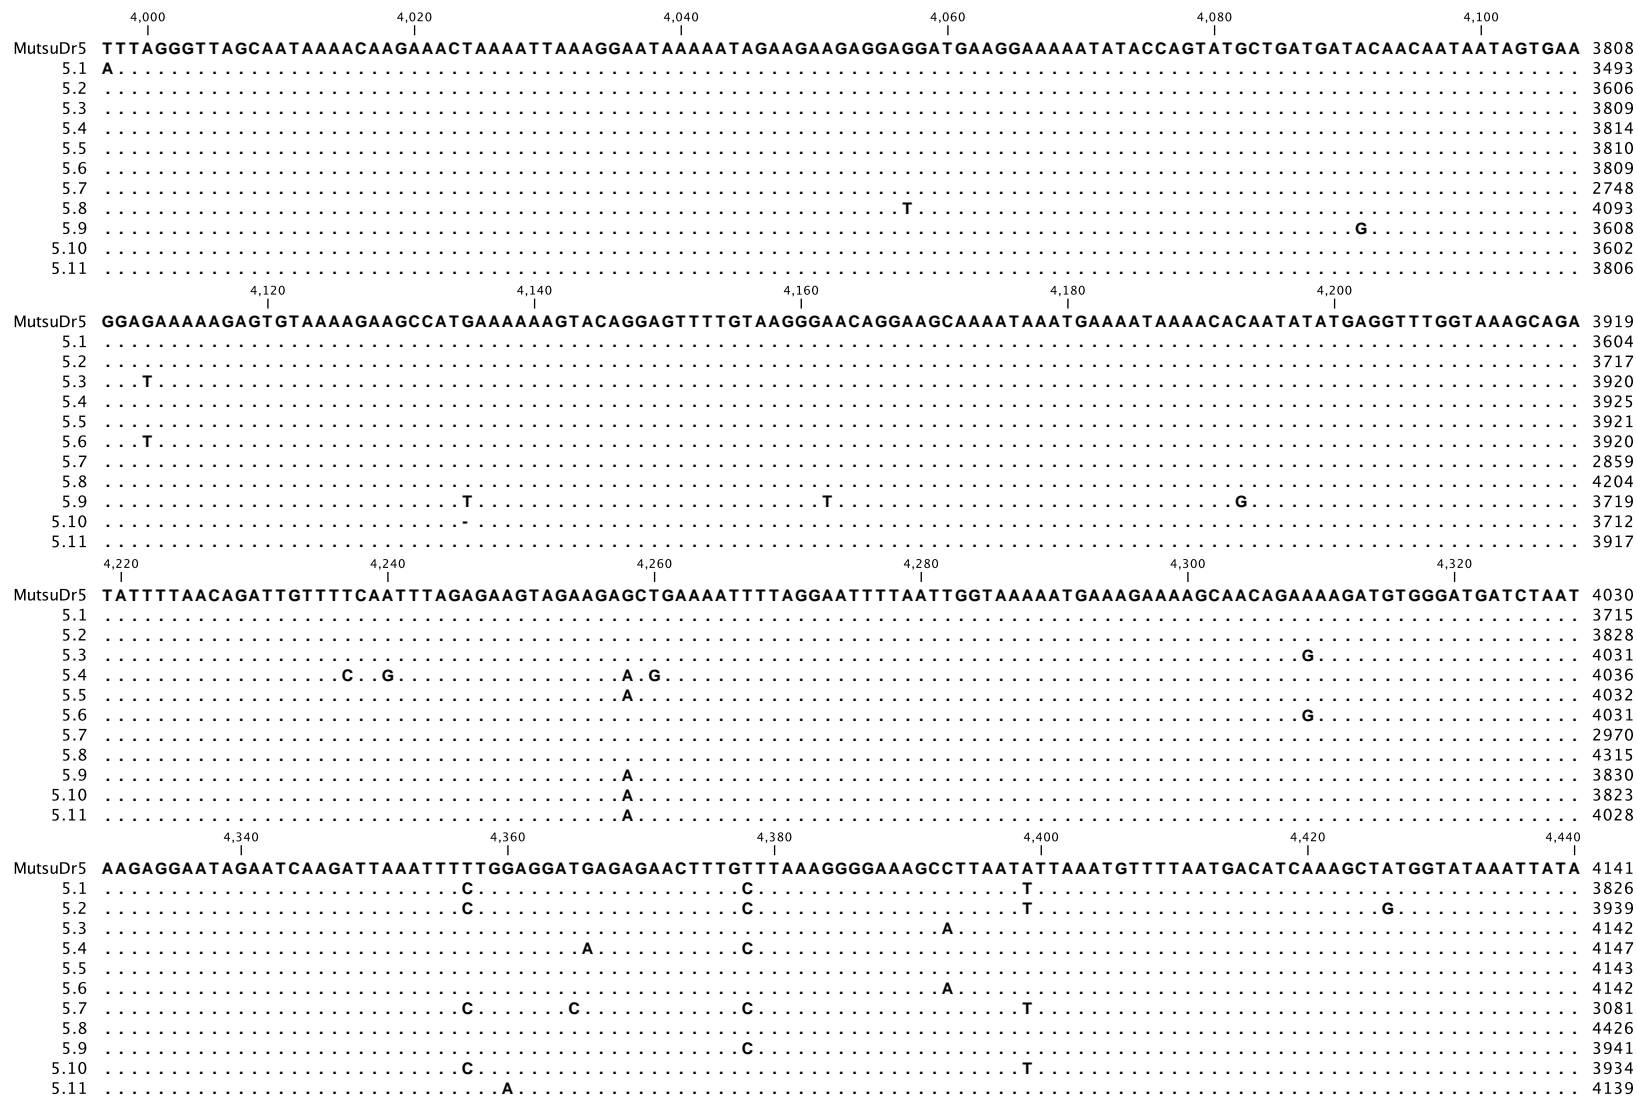

Supplemental Figure S9

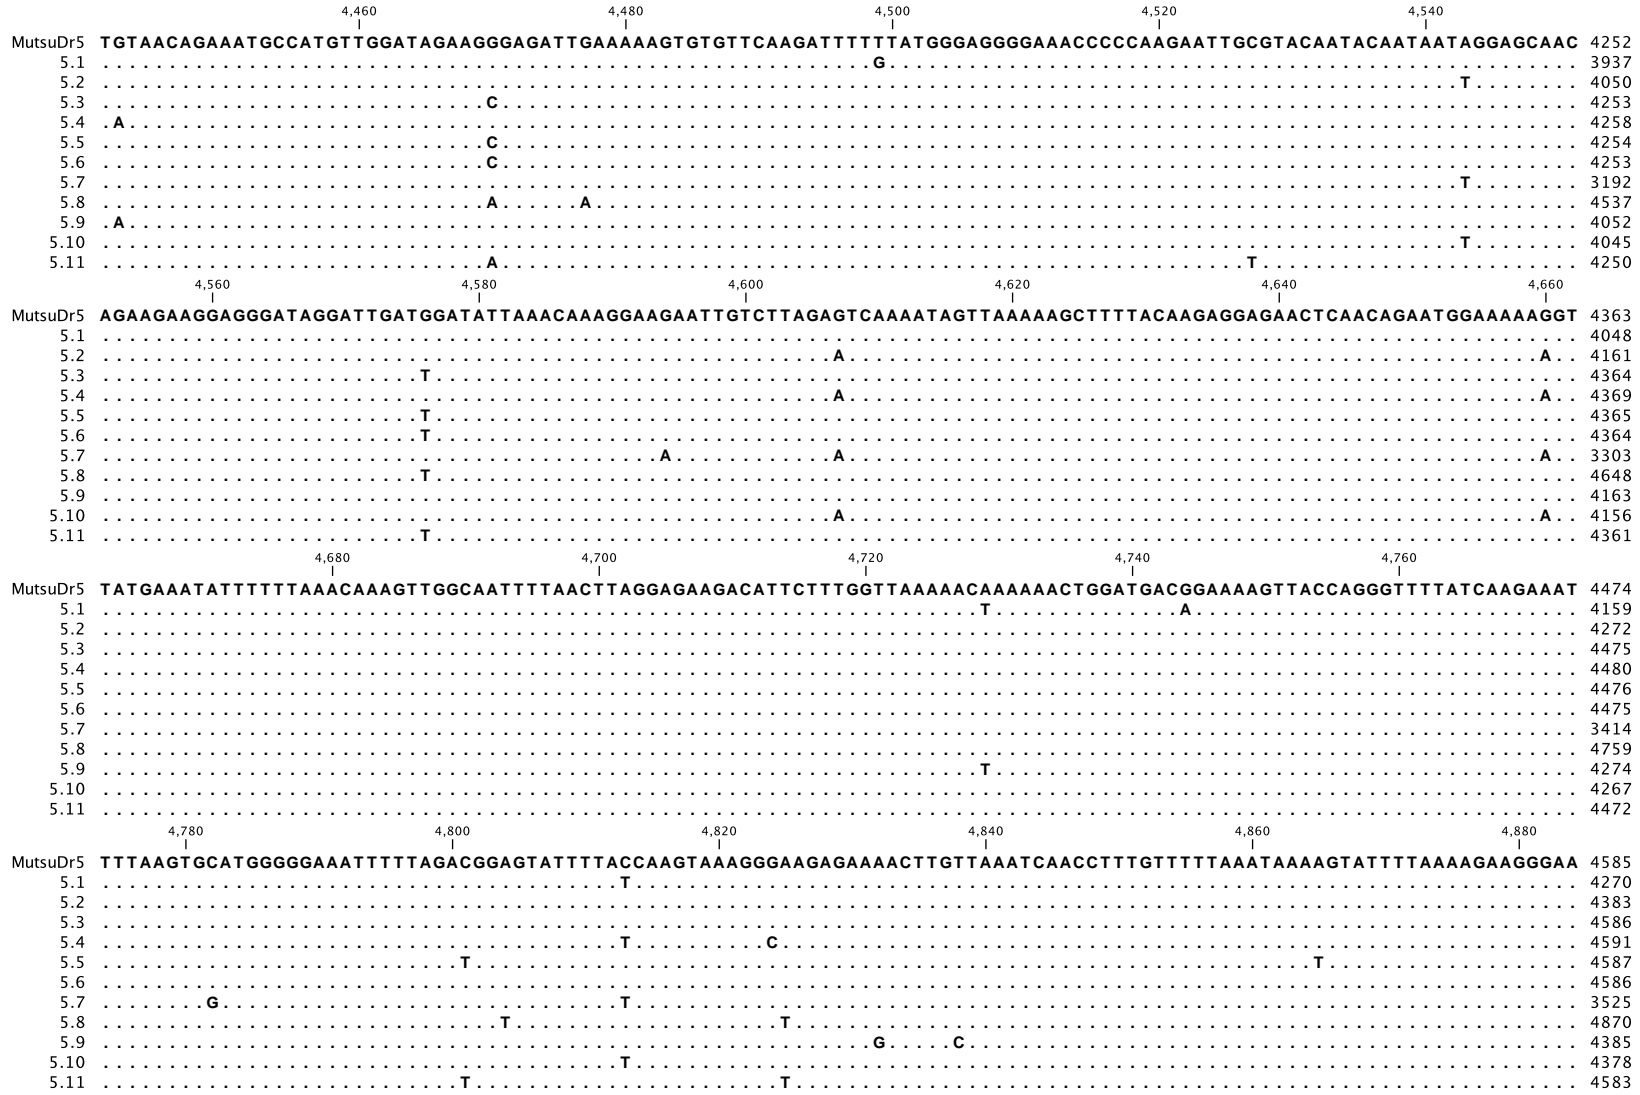

Supplemental Figure S9

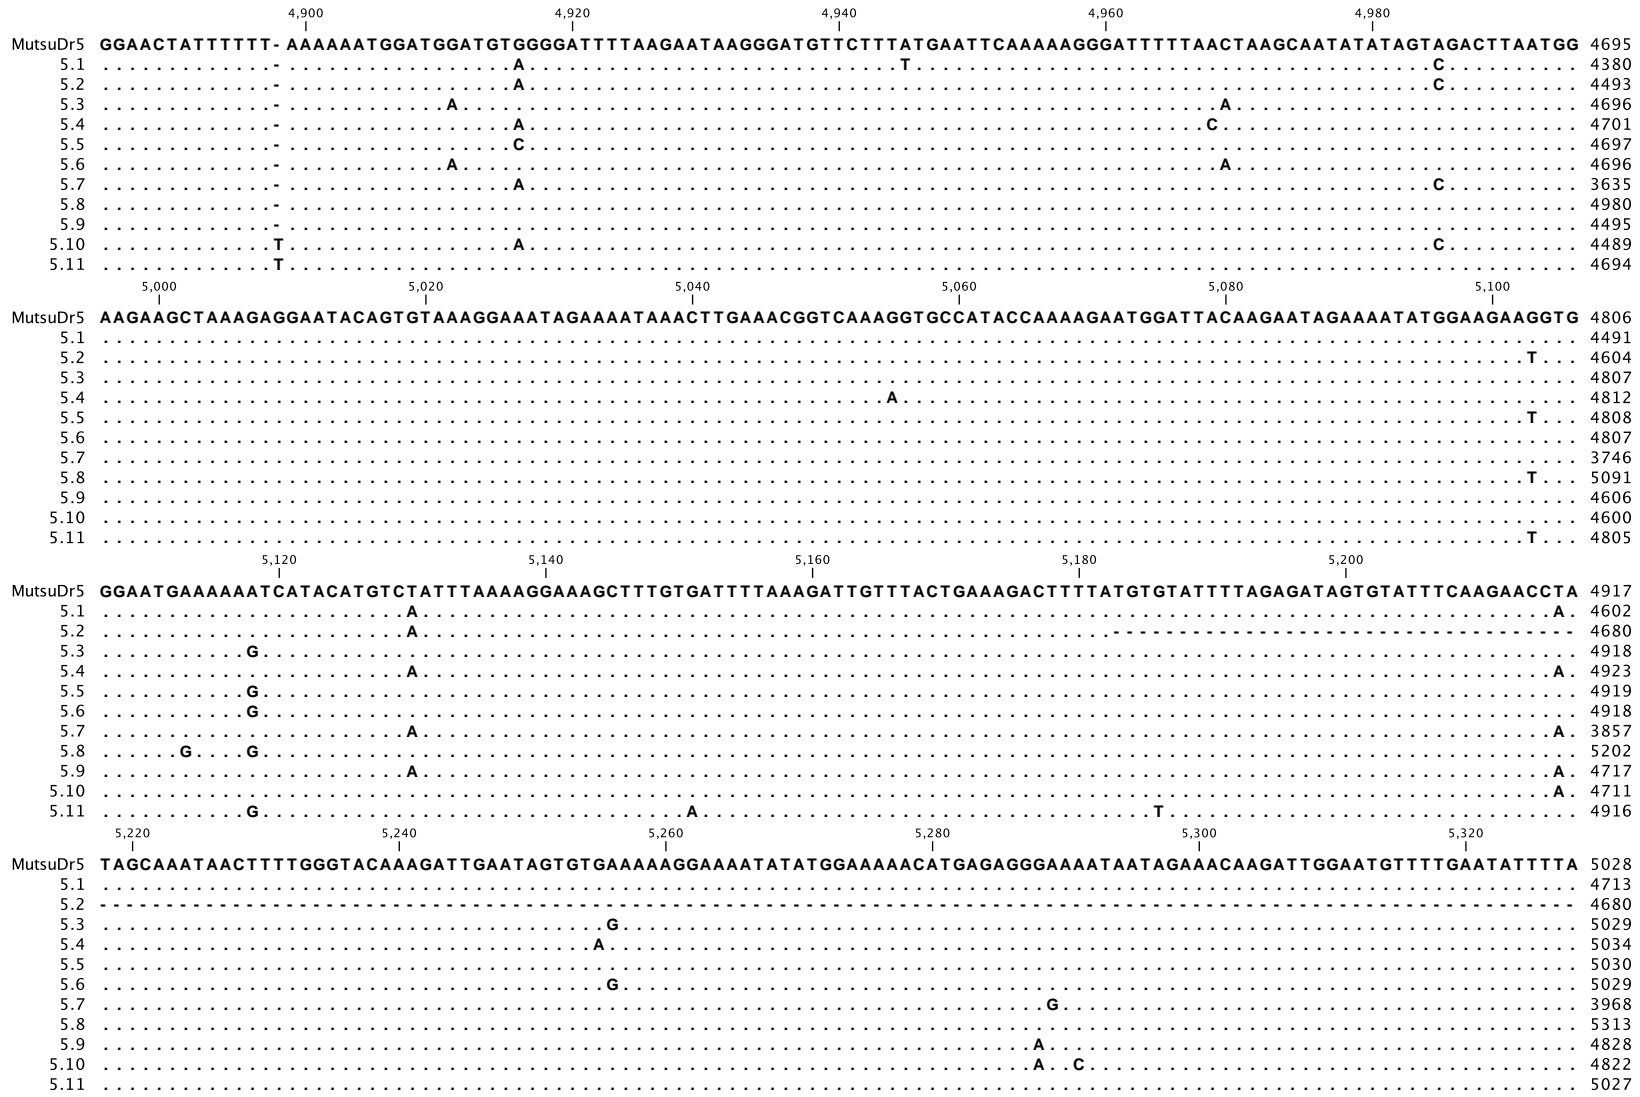



Supplemental Figure S9

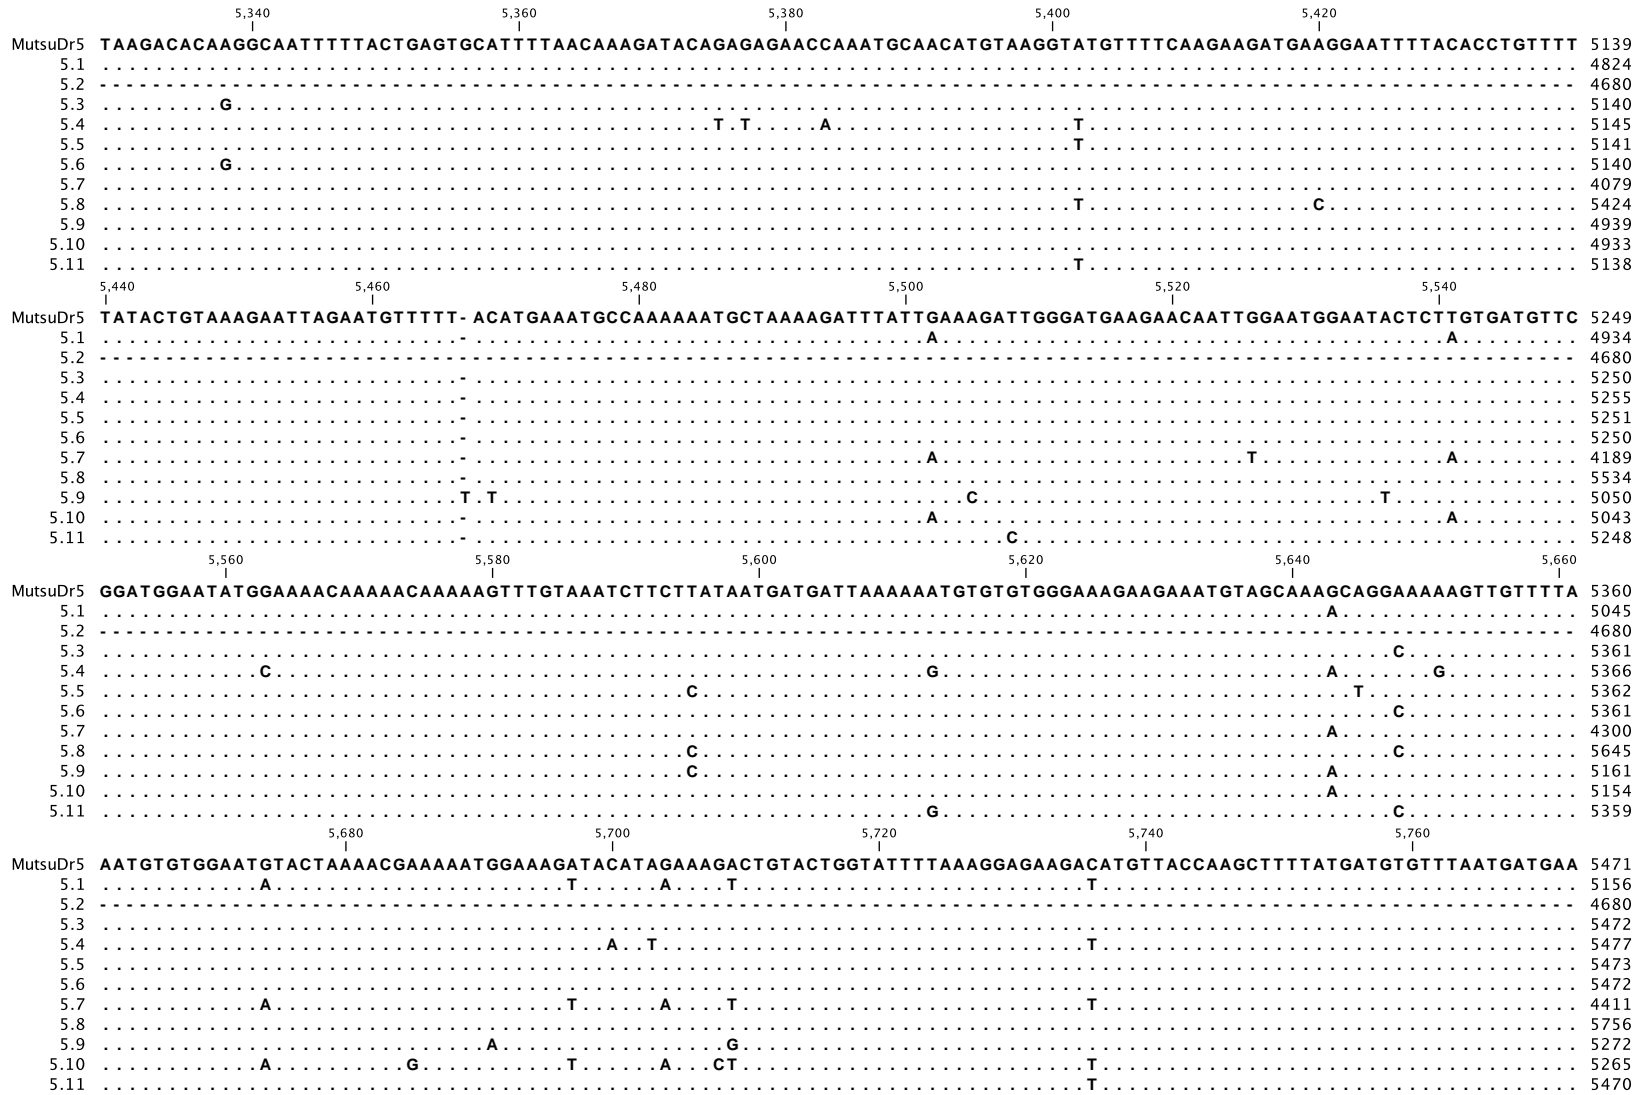

Supplemental Figure S9

|          |                                                                                                                  |       |       |       |       |       |                       |      |
|----------|------------------------------------------------------------------------------------------------------------------|-------|-------|-------|-------|-------|-----------------------|------|
|          | 5,780                                                                                                            | 5,800 | 5,820 | 5,840 | 5,860 | 5,880 |                       |      |
| MutsuDr5 | GTGTATAATGTTTTAAGTGGTTTAAAGTGGAAAATGCCCAAAGAGGATGTTATTTTATGAAGAATGTTTATTTTAAATGTATTTGTTTTGTGAAATTTCTTGAAGTATTTAA |       |       |       |       |       | 5582                  |      |
| 5.1      | .....A.....                                                                                                      |       |       |       |       |       | G                     | 5267 |
| 5.2      | .....                                                                                                            |       |       |       |       |       |                       | 4680 |
| 5.3      | .....                                                                                                            |       |       |       |       |       | C                     | 5583 |
| 5.4      | .....A.....T.G.....G.....A.....                                                                                  |       |       |       |       |       |                       | 5588 |
| 5.5      | .....A.....                                                                                                      |       |       |       |       |       | AAA.AAAAAAAAAA.AAAAAA | 5574 |
| 5.6      | .....                                                                                                            |       |       |       |       |       | C                     | 5583 |
| 5.7      | .....A.....A.....G.....G.....                                                                                    |       |       |       |       |       | G                     | 4522 |
| 5.8      | .....                                                                                                            |       |       |       |       |       | T                     | 5867 |
| 5.9      | .....                                                                                                            |       |       |       |       |       |                       | 5383 |
| 5.10     | .....A.....C.....                                                                                                |       |       |       |       |       | G                     | 5376 |
| 5.11     | .....                                                                                                            |       |       |       |       |       |                       | 5581 |
|          | 5,900                                                                                                            | 5,920 | 5,940 |       |       |       |                       |      |
| MutsuDr5 | ATGTTAATGTAATGTGATTATTTTAAATAAAAAAAAAAAAAAAAAAAAAAAAAA                                                           |       |       |       |       |       | 5638                  |      |
| 5.1      | .....G.AA.T.T.GAAA.A.....AA                                                                                      |       |       |       |       |       |                       | 5325 |
| 5.2      | .....                                                                                                            |       |       |       |       |       |                       | 4680 |
| 5.3      | .....T.....                                                                                                      |       |       |       |       |       | AAAAA                 | 5645 |
| 5.4      | .....A.T.....                                                                                                    |       |       |       |       |       |                       | 5643 |
| 5.5      | .....                                                                                                            |       |       |       |       |       |                       | 5574 |
| 5.6      | .....T.....                                                                                                      |       |       |       |       |       | AAAAA                 | 5644 |
| 5.7      | .....G.AA.T.T.GAA.G.....                                                                                         |       |       |       |       |       |                       | 4578 |
| 5.8      | .....G.....                                                                                                      |       |       |       |       |       |                       | 5922 |
| 5.9      | .....AA.AAAAA.G.G.....                                                                                           |       |       |       |       |       |                       | 5423 |
| 5.10     | .....T.G.AA.T.T.GAA.G.G.....G.....                                                                               |       |       |       |       |       | AAAAAAAAAAAAAAAAA     | 5449 |
| 5.11     | .....A.....A.....G.....G.G.....                                                                                  |       |       |       |       |       | AAA                   | 5640 |

Supplemental Figure S9

|          |                                                                                                                         |     |     |     |     |     |     |
|----------|-------------------------------------------------------------------------------------------------------------------------|-----|-----|-----|-----|-----|-----|
|          |                                                                                                                         | 20  | 40  | 60  | 80  | 100 |     |
| MutsuDr6 | <b>GGAAATCCTCGAACTTGGTACATTCCAGGAAGTGTTTGGCTGCAGTTGGGAGAGAAAGGCTCTCCCTACTCTTTGTTTATTTCTTTTGTATTGTAAGTATTAGAGTTA</b>     |     |     |     |     |     | 111 |
| 6.1      | .....                                                                                                                   |     |     |     |     |     | 111 |
| 6.2      | .....                                                                                                                   |     |     |     |     |     | 111 |
| 6.3      | .....                                                                                                                   |     |     |     |     |     | 111 |
| 6.4      | .....                                                                                                                   |     |     |     |     |     | 111 |
| 6.5      | .....                                                                                                                   |     |     |     |     |     | 111 |
| 6.6      | .....                                                                                                                   |     |     |     |     |     | 111 |
| 6.7      | .....                                                                                                                   |     |     |     |     |     | 111 |
|          |                                                                                                                         | 120 | 140 | 160 | 180 | 200 | 220 |
| MutsuDr6 | <b>ATTTGTTTTTTTTGTTTTGTGAAGTTTATTTTCCTCCAACAGCATTAGCTGTTGGGAGGAACCTATTTTTTTCATTTGGAACCTTTTTTTGGAGTAAGCAATGGCGG</b>      |     |     |     |     |     | 222 |
| 6.1      | .....                                                                                                                   |     |     |     |     |     | 222 |
| 6.2      | .....                                                                                                                   |     |     |     |     |     | 222 |
| 6.3      | .....                                                                                                                   |     |     |     |     |     | 222 |
| 6.4      | ..... <b>C</b> .....                                                                                                    |     |     |     |     |     | 222 |
| 6.5      | .....                                                                                                                   |     |     |     |     |     | 222 |
| 6.6      | .....                                                                                                                   |     |     |     |     |     | 222 |
| 6.7      | .....                                                                                                                   |     |     |     |     |     | 222 |
|          |                                                                                                                         | 240 | 260 | 280 | 300 | 320 |     |
| MutsuDr6 | <b>ACGGATGCACGGCAACAAACACGGACATGGCAGGAGAAACTCGACTGGTCAAAGATAATGGACTGGCAGGAGAACGCCAAAGGCTATCGACATTGGATTAGGAGGAGAAA</b>   |     |     |     |     |     | 333 |
| 6.1      | .....                                                                                                                   |     |     |     |     |     | 333 |
| 6.2      | .....                                                                                                                   |     |     |     |     |     | 333 |
| 6.3      | .....                                                                                                                   |     |     |     |     |     | 333 |
| 6.4      | .....                                                                                                                   |     |     |     |     |     | 333 |
| 6.5      | .....                                                                                                                   |     |     |     |     |     | 333 |
| 6.6      | ..... <b>A</b> .....                                                                                                    |     |     |     |     |     | 333 |
| 6.7      | ..... <b>A</b> .....                                                                                                    |     |     |     |     |     | 333 |
|          |                                                                                                                         | 340 | 360 | 380 | 400 | 420 | 440 |
| MutsuDr6 | <b>CAAGCACGGCAAACGACAACGGACTGGCAGGAGGAACAAGCAAGGCTAACGAAAATGGACTGGATAAACGACCAGAAATGAAACAAAACGAAAAAGTAAGTTTGC GG</b>     |     |     |     |     |     | 444 |
| 6.1      | .....                                                                                                                   |     |     |     |     |     | 444 |
| 6.2      | .....                                                                                                                   |     |     |     |     |     | 444 |
| 6.3      | .....                                                                                                                   |     |     |     |     |     | 444 |
| 6.4      | .....                                                                                                                   |     |     |     |     |     | 444 |
| 6.5      | .....                                                                                                                   |     |     |     |     |     | 444 |
| 6.6      | .....                                                                                                                   |     |     |     |     |     | 444 |
| 6.7      | .....                                                                                                                   |     |     |     |     |     | 444 |
|          |                                                                                                                         | 460 | 480 | 500 | 520 | 540 |     |
| MutsuDr6 | <b>AGAGAAAATACTTGAAGGAGGCTACGGTGATTATAAATGTGGAAAACGTA CTGGAGTAAAGGCAGAAAGATGTTATTAAGCGATAATGGAAAATGTGGACAAGGAAAA</b>    |     |     |     |     |     | 555 |
| 6.1      | .....                                                                                                                   |     |     |     |     |     | 555 |
| 6.2      | .....                                                                                                                   |     |     |     |     |     | 555 |
| 6.3      | .....                                                                                                                   |     |     |     |     |     | 555 |
| 6.4      | ..... <b>G</b> .....                                                                                                    |     |     |     |     |     | 555 |
| 6.5      | .....                                                                                                                   |     |     |     |     |     | 555 |
| 6.6      | .....                                                                                                                   |     |     |     |     |     | 555 |
| 6.7      | .....                                                                                                                   |     |     |     |     |     | 555 |
|          |                                                                                                                         | 560 | 580 | 600 | 620 | 640 | 660 |
| MutsuDr6 | <b>TGTTGGCGCTCAGACCCAGACAAGGCAAAGAATATGAACTGACCATGGAAAAAGAAGAGGAGTGTGAAAAC TTTAGAAAGGACTAACAATTAATGGAGTGA ACTGTGAAG</b> |     |     |     |     |     | 666 |
| 6.1      | .....                                                                                                                   |     |     |     |     |     | 666 |
| 6.2      | .....                                                                                                                   |     |     |     |     |     | 666 |
| 6.3      | .....                                                                                                                   |     |     |     |     |     | 666 |
| 6.4      | .....                                                                                                                   |     |     |     |     |     | 666 |
| 6.5      | .....                                                                                                                   |     |     |     |     |     | 666 |
| 6.6      | .....                                                                                                                   |     |     |     |     |     | 666 |
| 6.7      | .....                                                                                                                   |     |     |     |     |     | 666 |

Supplemental Figure S9

|          |                                                                                                                       |       |       |       |       |       |       |
|----------|-----------------------------------------------------------------------------------------------------------------------|-------|-------|-------|-------|-------|-------|
|          |                                                                                                                       | 680   | 700   | 720   | 740   | 760   |       |
| MutsuDr6 | <b>TTAAAAGTTTGCACAACCGAGATTATGTAGTTTCCTTCTTGCACCTGCCTGTCTACCTGGAAAATAGTATAATTGTAGAAAAATTGGAAGGATGGGGTGTGAGCCACTAA</b> |       |       |       |       |       | 777   |
| 6.1      | .....                                                                                                                 |       |       |       |       |       | 777   |
| 6.2      | .....                                                                                                                 |       |       |       |       |       | 777   |
| 6.3      | .....                                                                                                                 |       |       |       |       |       | 777   |
| 6.4      | .....                                                                                                                 |       |       |       |       |       | 777   |
| 6.5      | .....                                                                                                                 |       |       |       |       |       | 777   |
| 6.6      | .....                                                                                                                 |       |       |       |       |       | 777   |
| 6.7      | .....                                                                                                                 |       |       |       |       |       | 777   |
|          |                                                                                                                       | 780   | 800   | 820   | 840   | 860   | 880   |
| MutsuDr6 | <b>CAAAAATTAAGAAGATGCTACCCGGGCACTGACATCGAAGATGGGACGAGGTTCTGAAAGTAAGGTTCCCGAAGGAGGTGGCATCACTGCCCTATAGCACGAGGCTAG</b>   |       |       |       |       |       | 888   |
| 6.1      | .....                                                                                                                 |       |       |       |       |       | 888   |
| 6.2      | .....                                                                                                                 |       |       |       |       |       | 888   |
| 6.3      | .....                                                                                                                 |       |       |       |       |       | 888   |
| 6.4      | .....                                                                                                                 |       |       |       |       |       | 888   |
| 6.5      | .....                                                                                                                 |       |       |       |       |       | 888   |
| 6.6      | .....                                                                                                                 |       |       |       |       |       | 888   |
| 6.7      | .....                                                                                                                 |       |       |       |       |       | 888   |
|          |                                                                                                                       | 900   | 920   | 940   | 960   | 980   |       |
| MutsuDr6 | <b>AAACAGCCGAAGGACCACAGCATTTCGGGTGATGCACAGTCGGCAAGTGAAAACCTGTAGGCAGTGCATGAGCCCGACCATCTGCTGAAAGACTGTCTAATTTCAAGT</b>   |       |       |       |       |       | 999   |
| 6.1      | .....                                                                                                                 |       |       |       |       |       | 999   |
| 6.2      | .....                                                                                                                 |       |       |       |       |       | 999   |
| 6.3      | .....                                                                                                                 |       |       |       |       |       | 999   |
| 6.4      | .....                                                                                                                 |       |       |       |       |       | 999   |
| 6.5      | .....                                                                                                                 |       |       |       |       |       | 999   |
| 6.6      | .....                                                                                                                 |       |       |       |       |       | 999   |
| 6.7      | .....                                                                                                                 |       |       |       |       |       | 999   |
|          |                                                                                                                       | 1,000 | 1,020 | 1,040 | 1,060 | 1,080 | 1,100 |
| MutsuDr6 | <b>GCTACAGATGCGGAGAATGGGGGCATTTGCACGATCGTGCACCACTGTCAGATGCTCGGAGTGTGCAAGAATCTTAGATAAATGGAATGTTGGATGGAAGGGAAGGAAG</b>  |       |       |       |       |       | 1110  |
| 6.1      | .....                                                                                                                 |       |       |       |       |       | 1110  |
| 6.2      | .....                                                                                                                 |       |       |       |       |       | 1110  |
| 6.3      | .....                                                                                                                 |       |       |       |       |       | 1110  |
| 6.4      | .....                                                                                                                 |       |       |       |       |       | 1110  |
| 6.5      | .....                                                                                                                 |       |       |       |       |       | 1110  |
| 6.6      | .....                                                                                                                 |       |       |       |       |       | 1110  |
| 6.7      | .....                                                                                                                 |       |       |       |       |       | 1110  |
|          |                                                                                                                       | 1,120 | 1,140 | 1,160 | 1,180 | 1,200 | 1,220 |
| MutsuDr6 | <b>GAGAAAAAGAAAAACAGGTGGACAGACAGGTGCAAGAAGGAAATAAGGAGGAAGATGCAAACTTGAAGGAGATCAGGAGGAAGCAACACAGCAAAGAGAAATAGAAC</b>    |       |       |       |       |       | 1221  |
| 6.1      | .....                                                                                                                 |       |       |       |       |       | 1221  |
| 6.2      | .....                                                                                                                 |       |       |       |       |       | 1221  |
| 6.3      | .....                                                                                                                 |       |       |       |       |       | 1221  |
| 6.4      | .....                                                                                                                 |       |       |       |       |       | 1221  |
| 6.5      | .....                                                                                                                 |       |       |       |       |       | 1221  |
| 6.6      | .....                                                                                                                 |       |       |       |       |       | 1221  |
| 6.7      | .....                                                                                                                 |       |       |       |       |       | 1221  |
|          |                                                                                                                       | 1,240 | 1,260 | 1,280 | 1,300 | 1,320 |       |
| MutsuDr6 | <b>AACTAAGAATAACACTGGAGAAGTTGTGGATTTAATGAAGATGGAGAAACGAAGGAGGGAGGAAATCAAATGATGGAATTGAGTTTTCAGACATGGAGGAAAATGGAC</b>   |       |       |       |       |       | 1332  |
| 6.1      | .....                                                                                                                 |       |       |       |       |       | 1332  |
| 6.2      | .....                                                                                                                 |       |       |       |       |       | 1332  |
| 6.3      | .....                                                                                                                 |       |       |       |       |       | 1332  |
| 6.4      | .....                                                                                                                 |       |       |       |       |       | 1332  |
| 6.5      | .....                                                                                                                 |       |       |       |       |       | 1332  |
| 6.6      | .....                                                                                                                 |       |       |       |       |       | 1332  |
| 6.7      | .....                                                                                                                 |       |       |       |       |       | 1332  |

Supplemental Figure S9

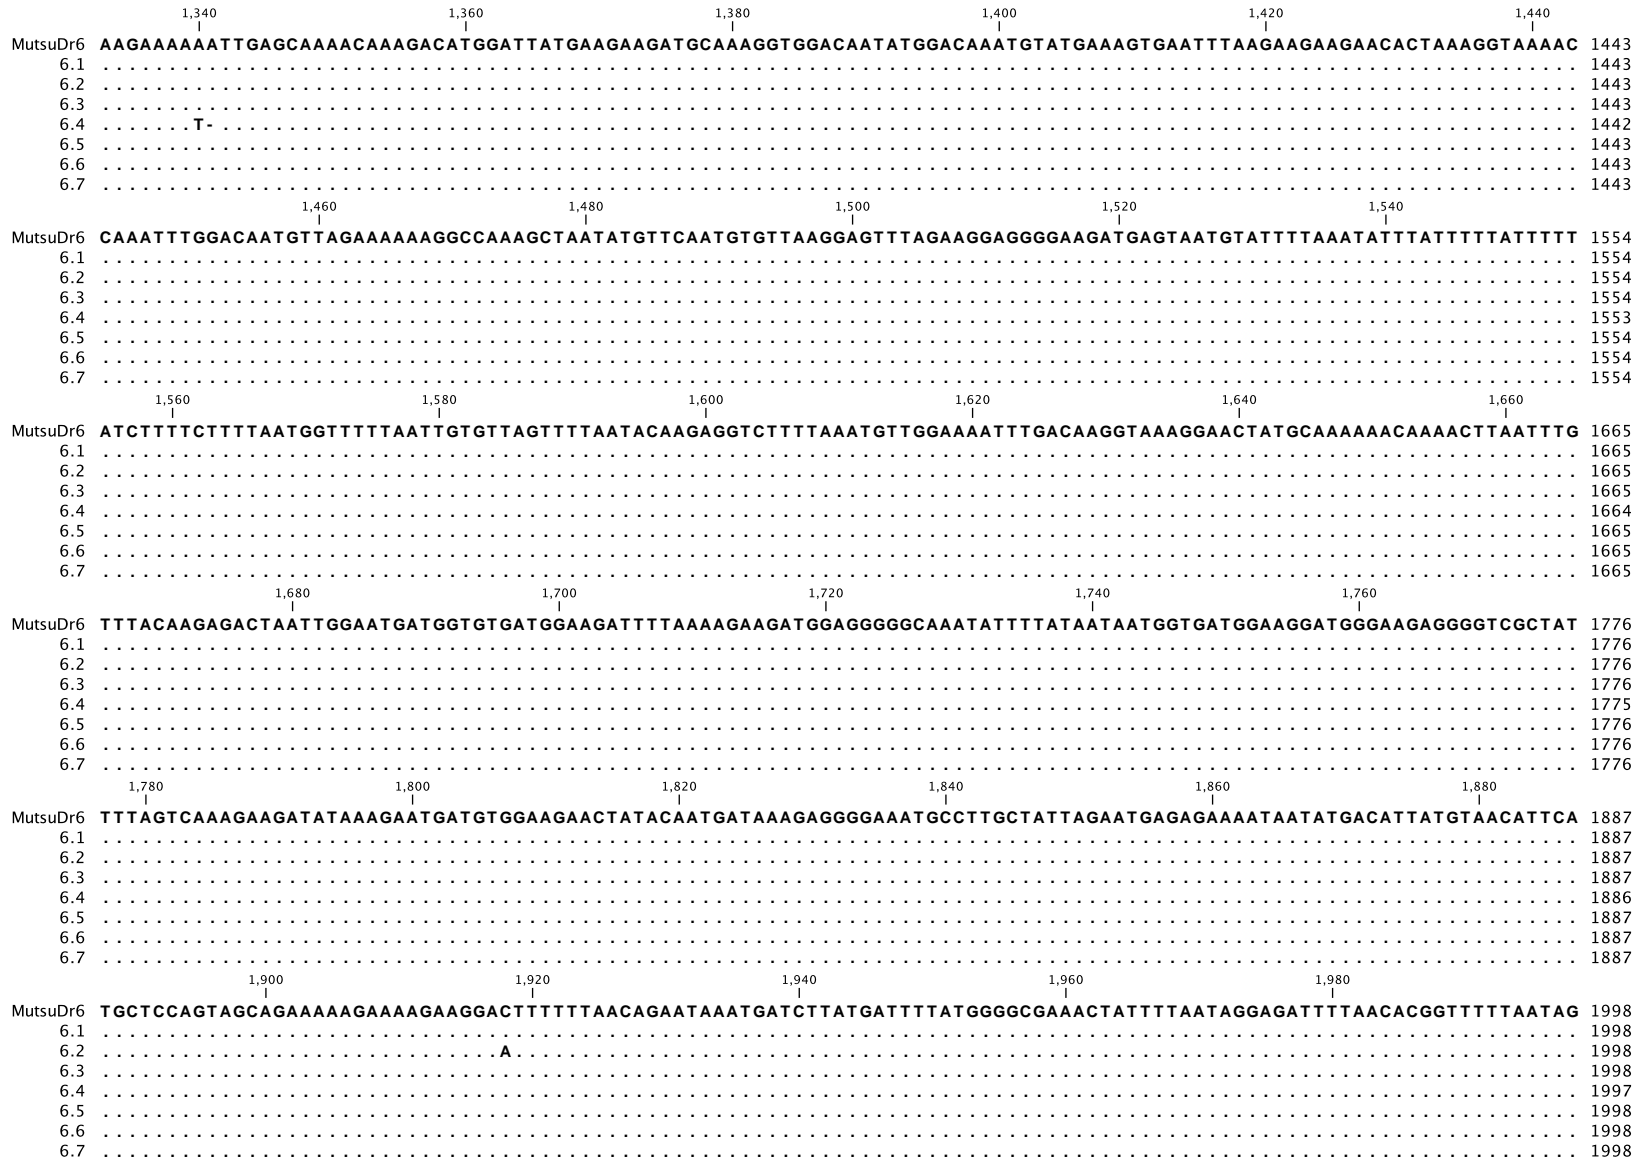

Supplemental Figure S9

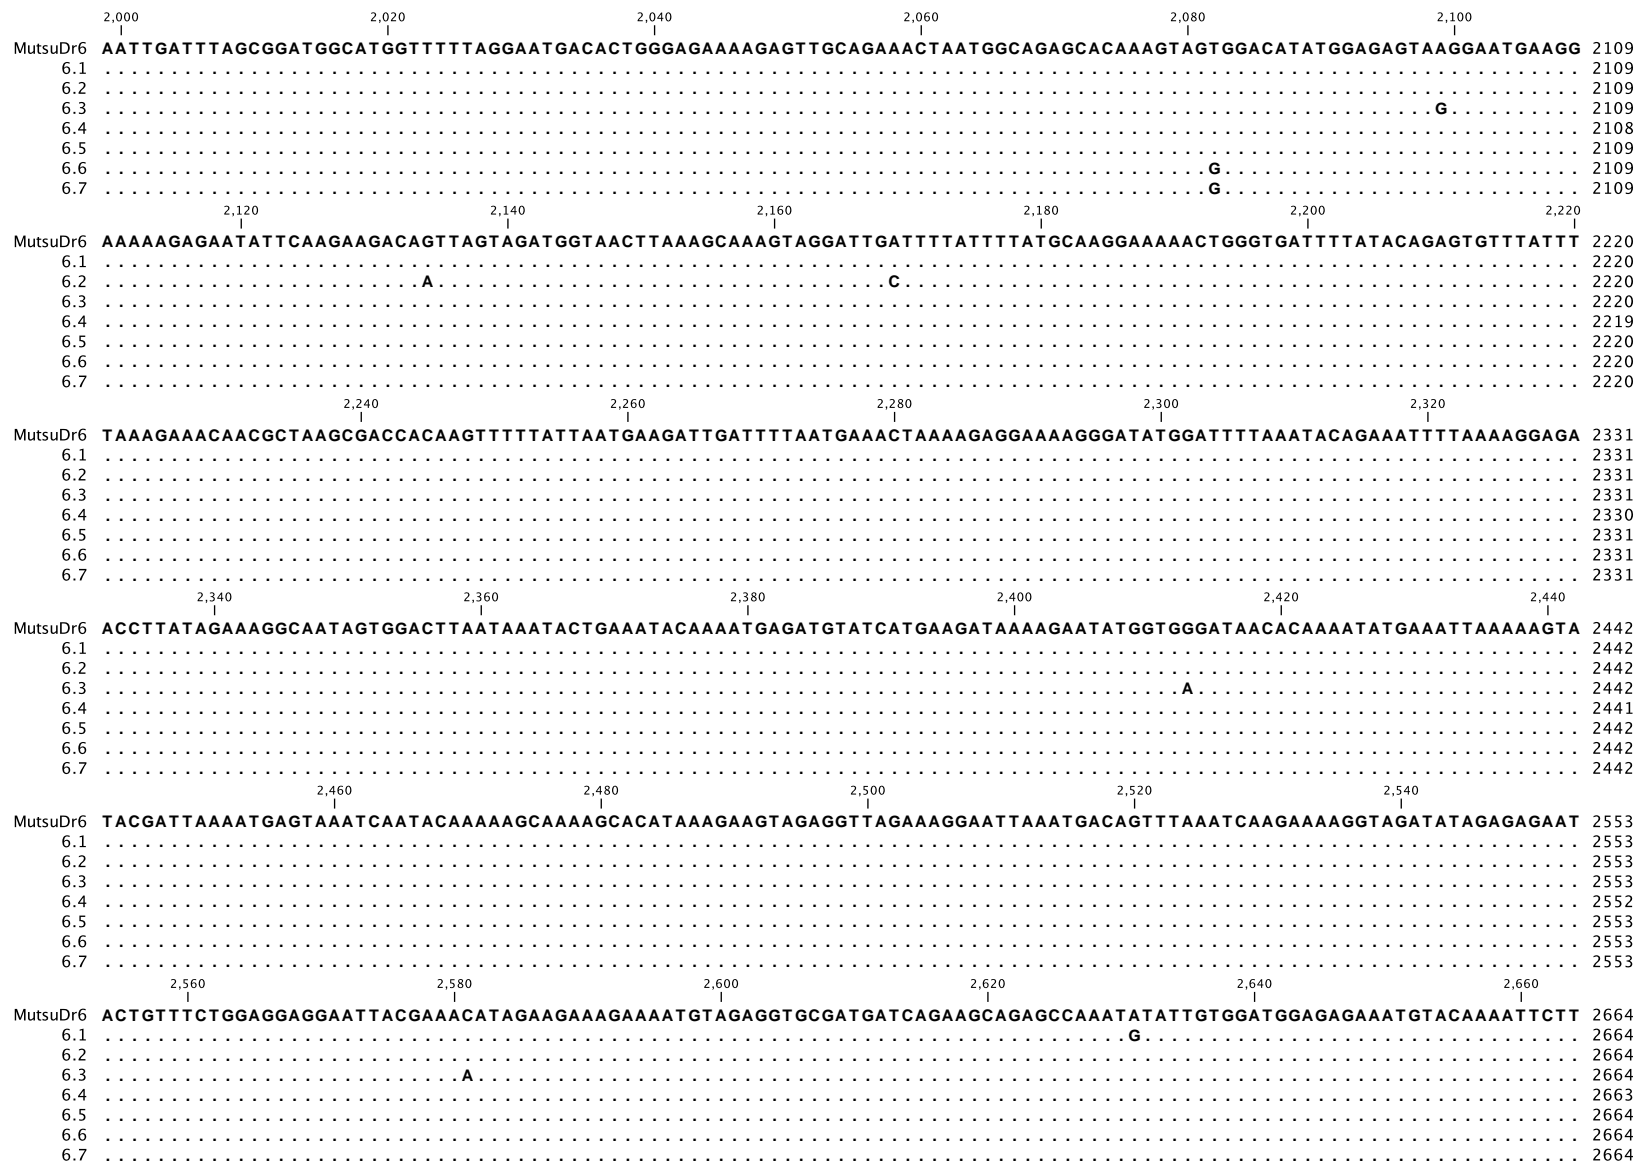

Supplemental Figure S9

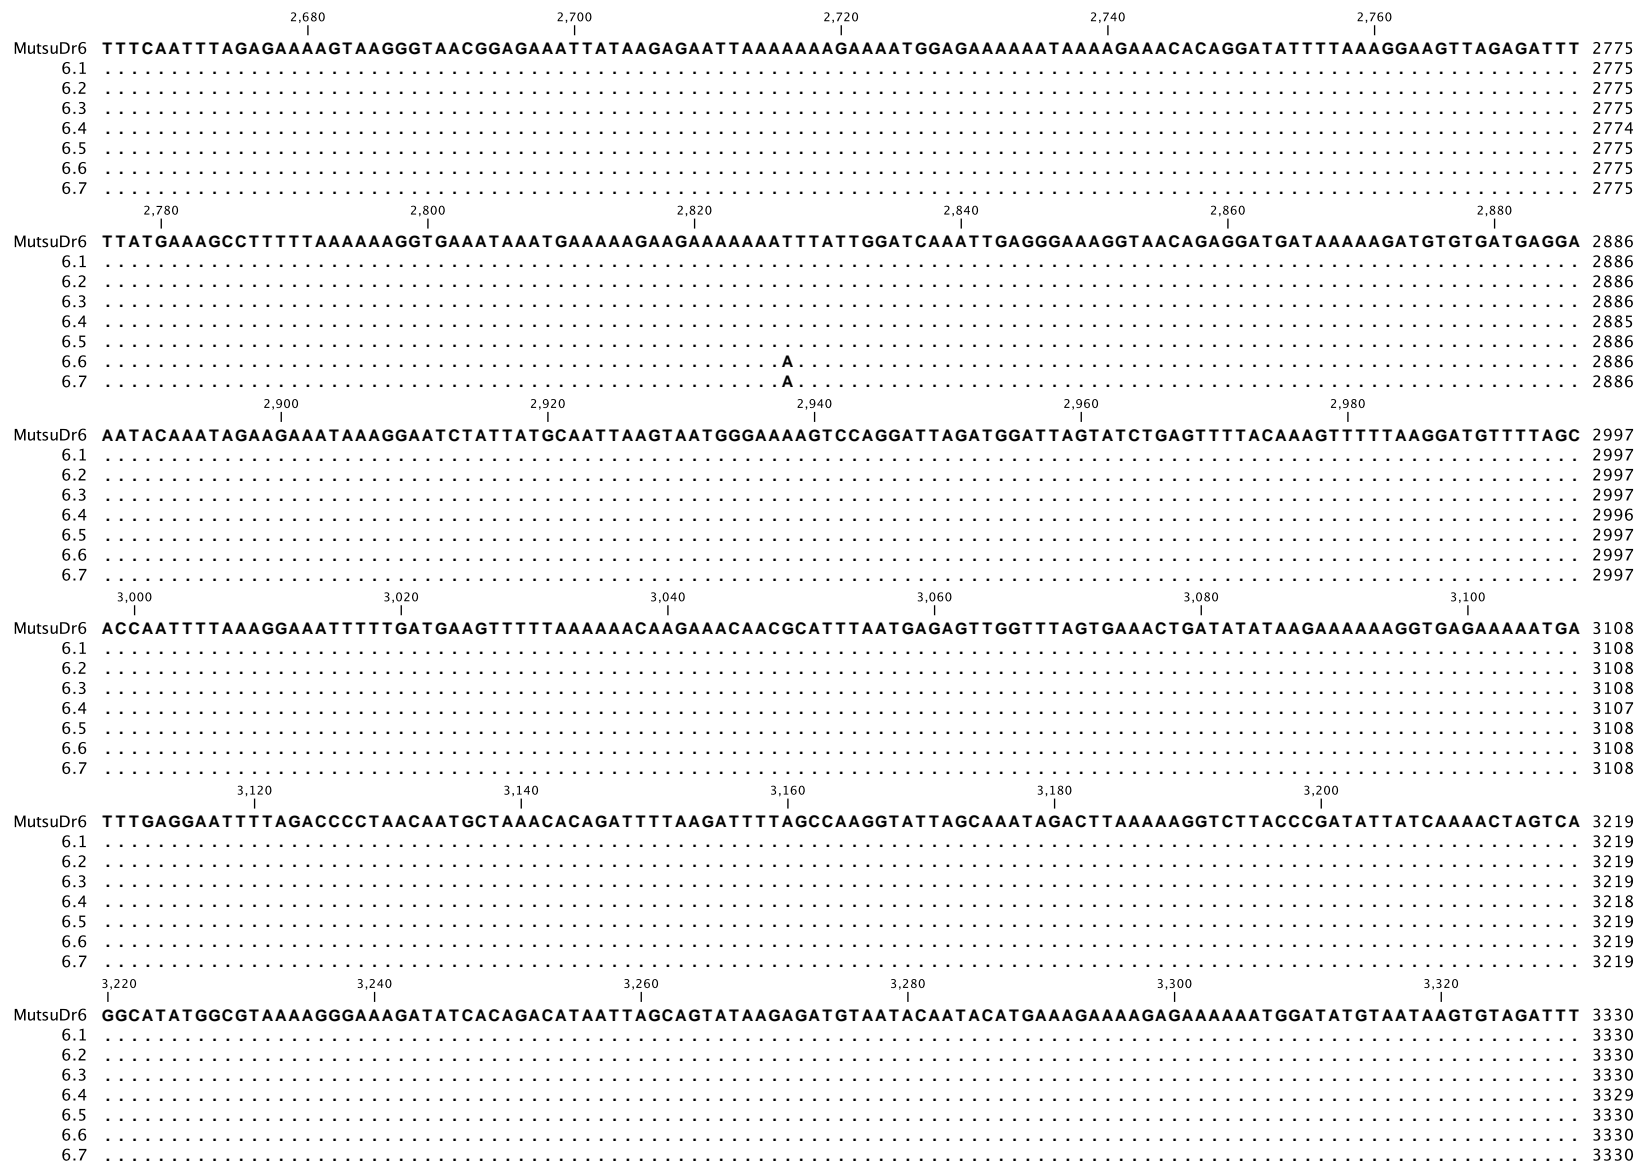

Supplemental Figure S9

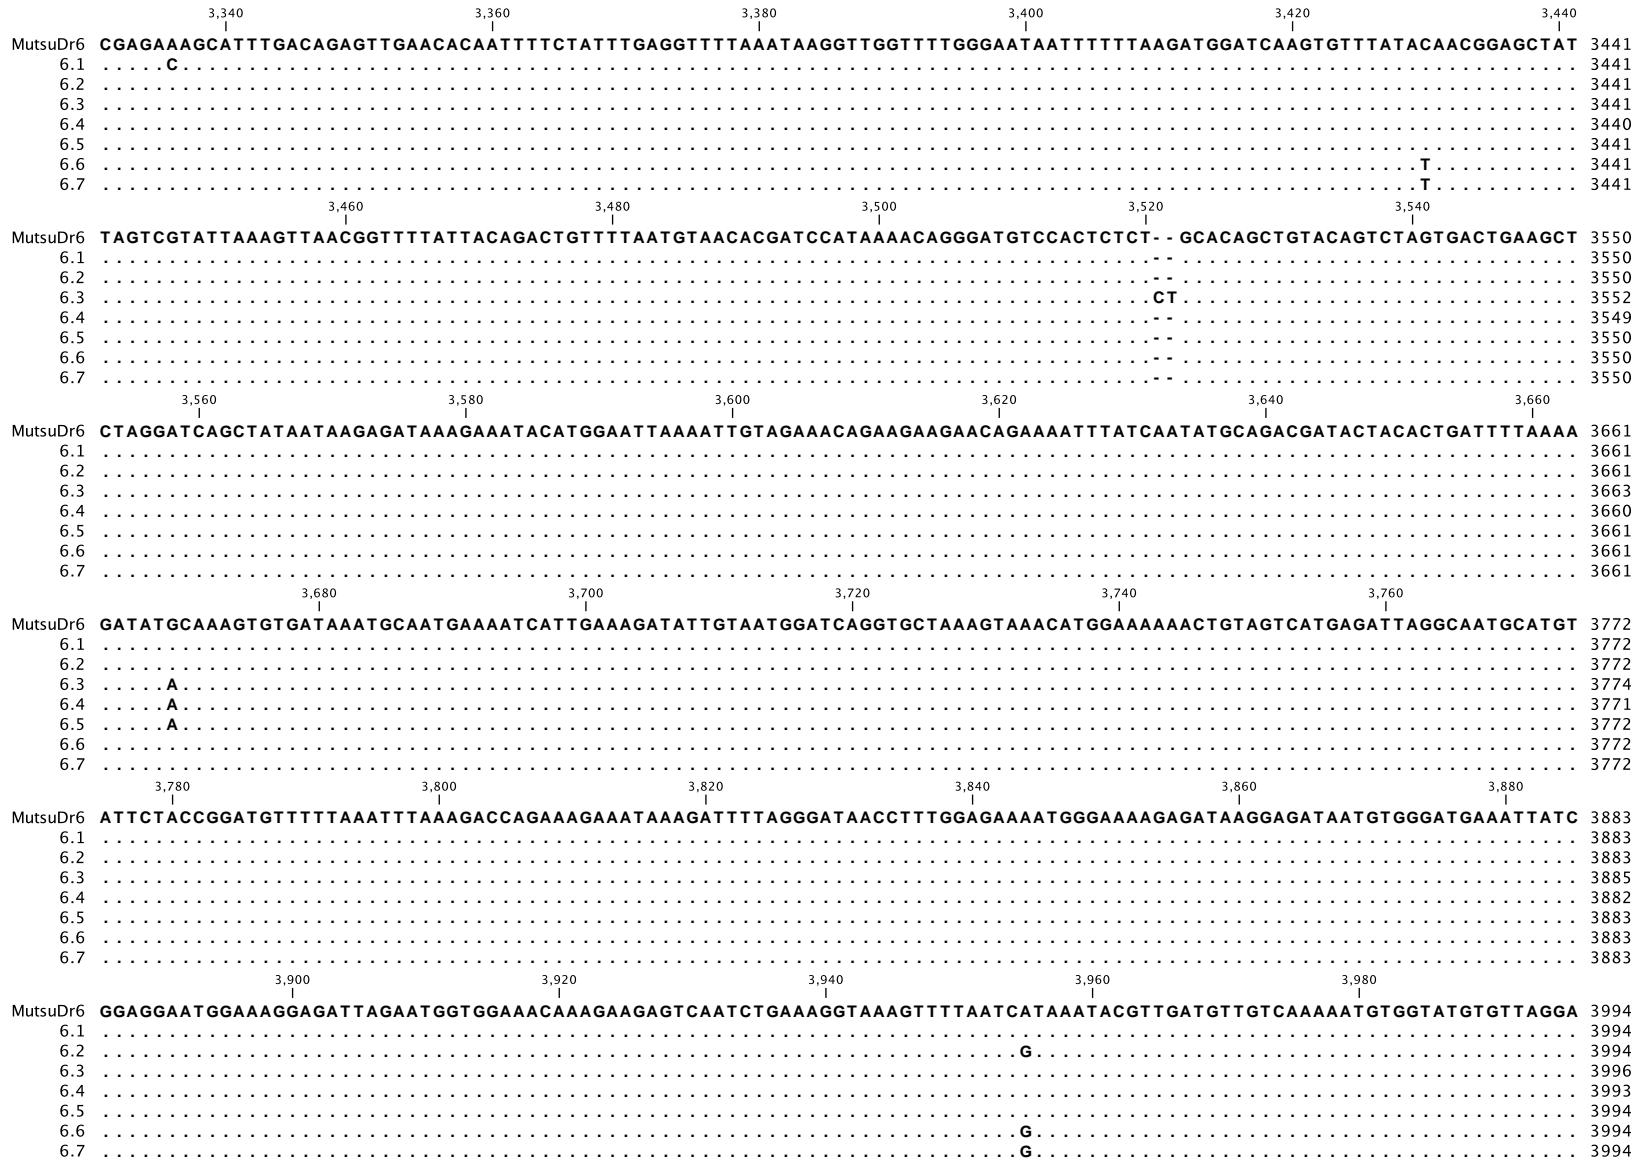



Supplemental Figure S9

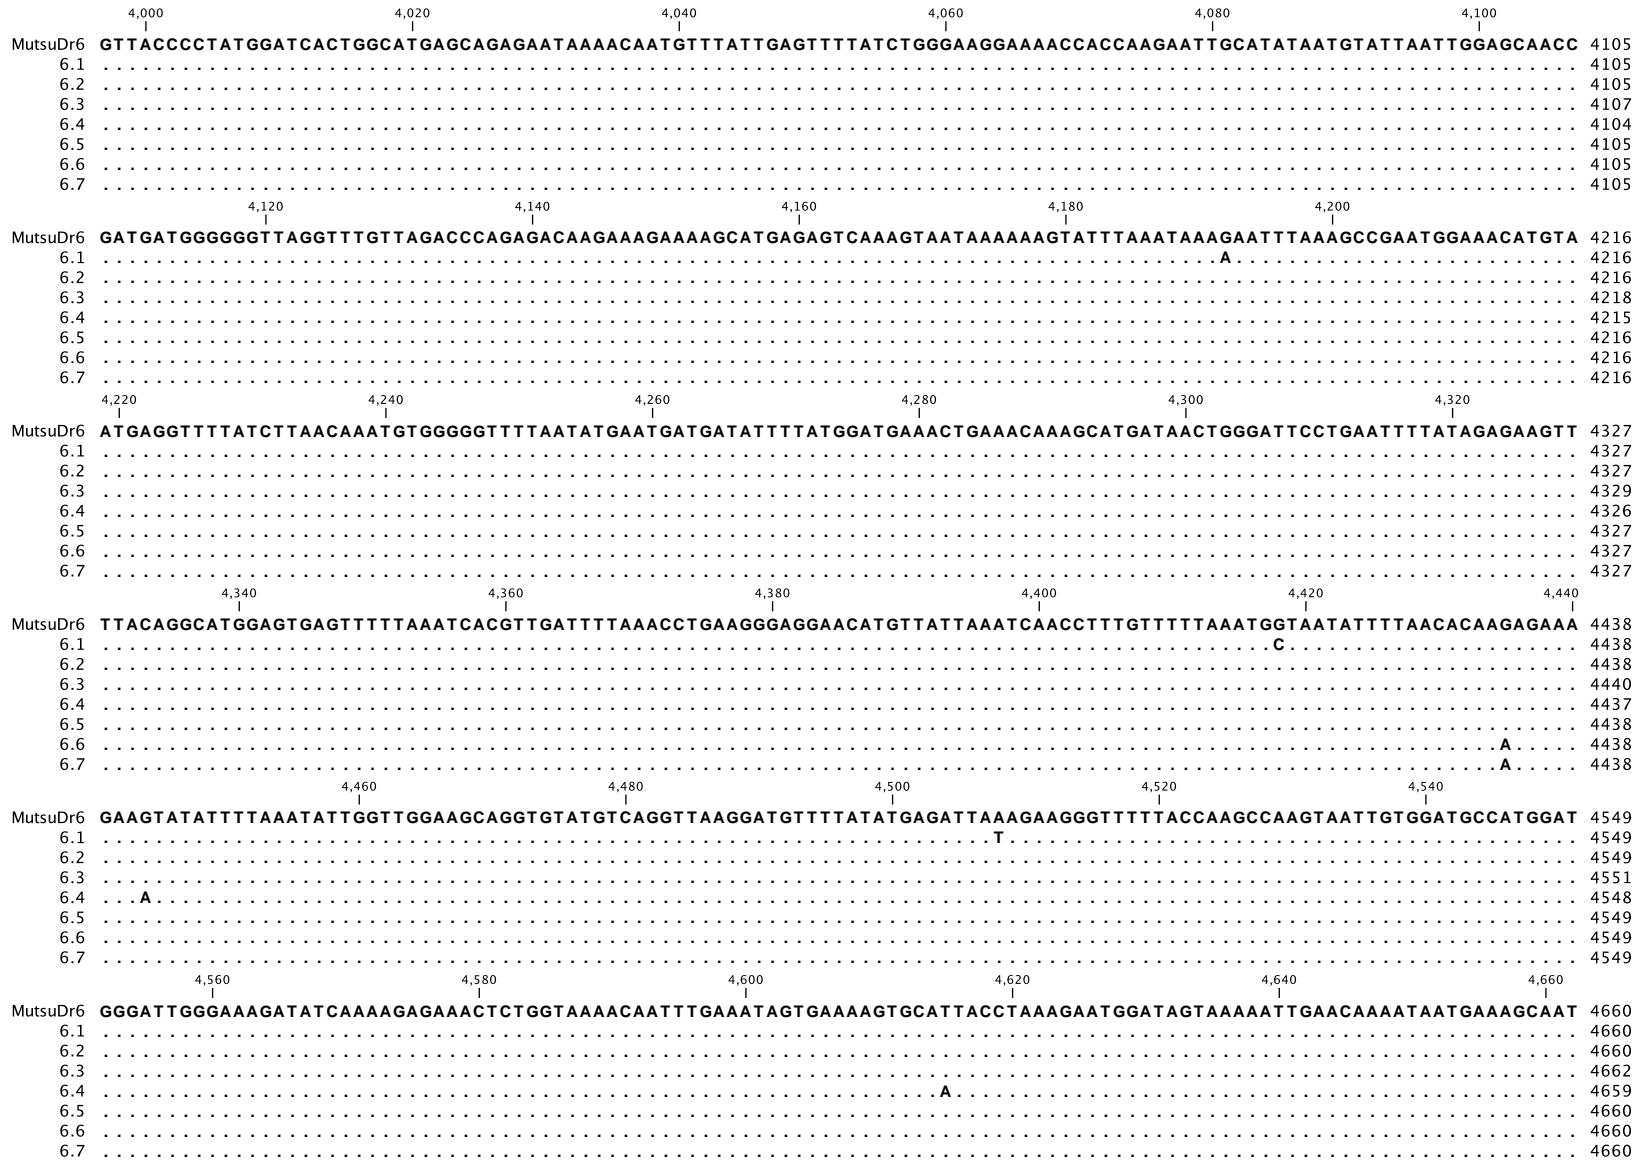

Supplemental Figure S9

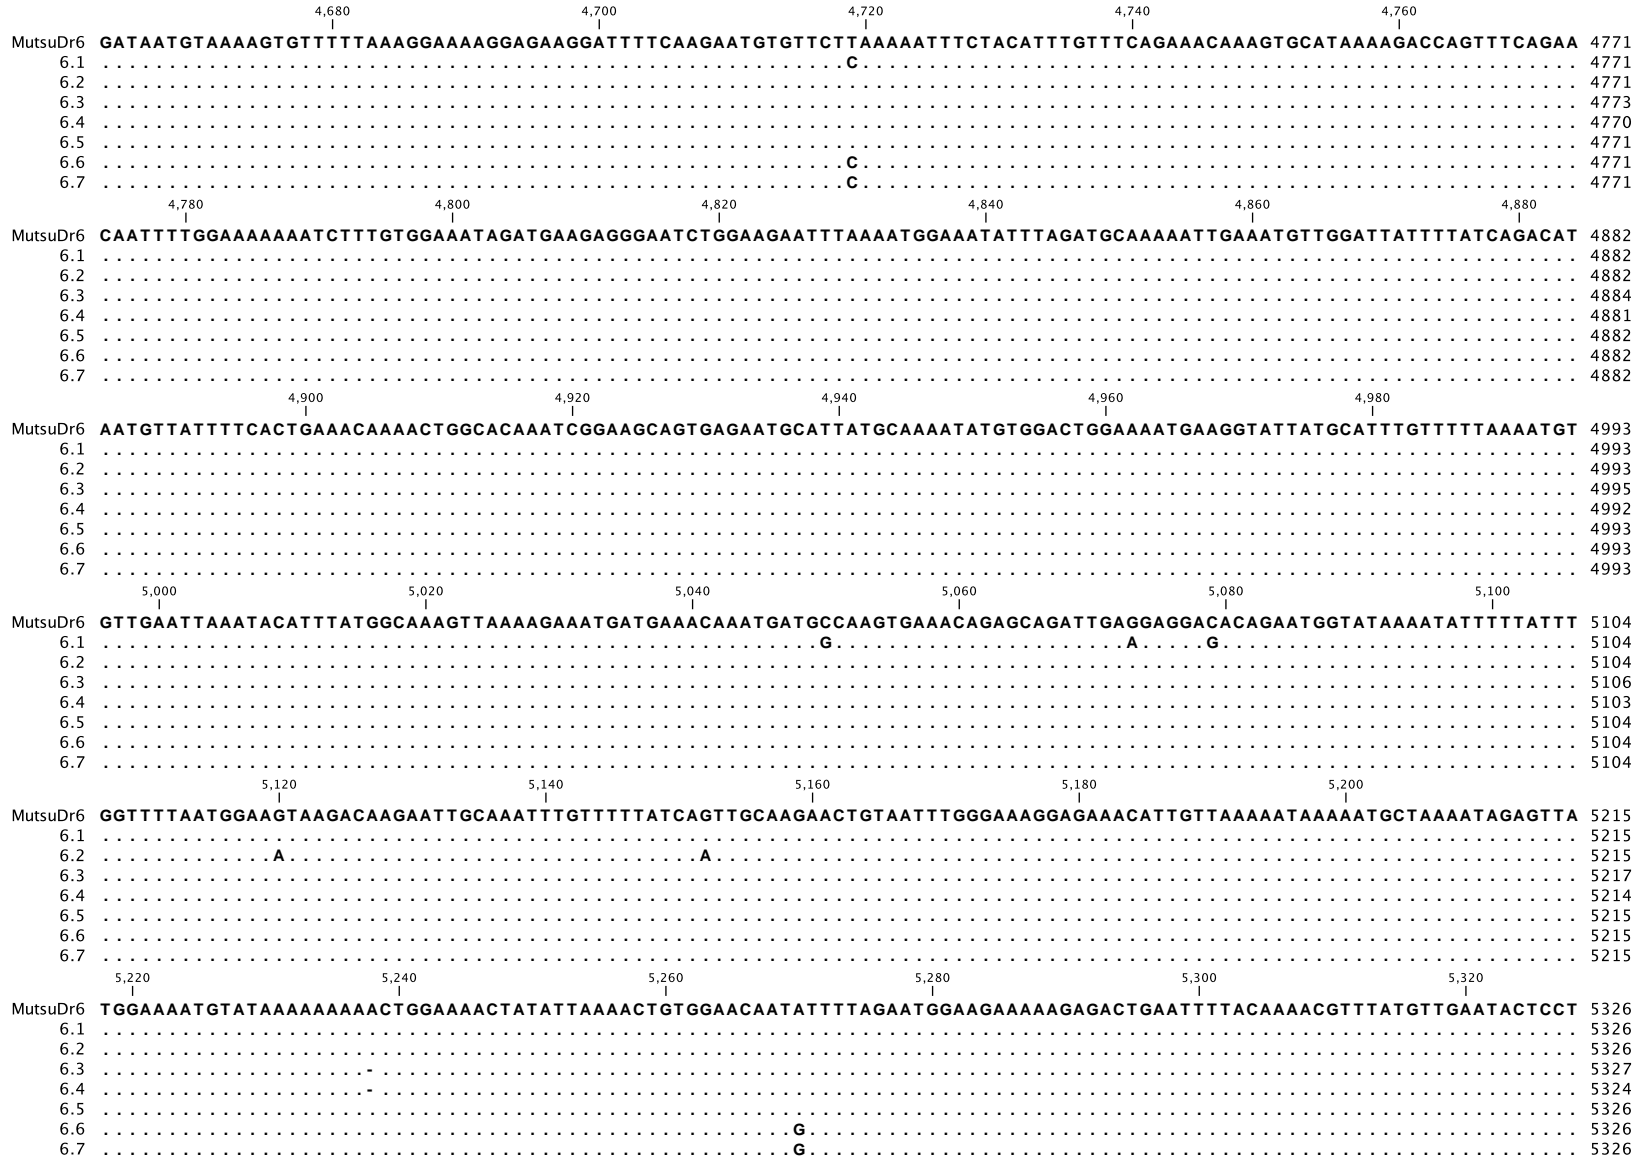

Supplemental Figure S9

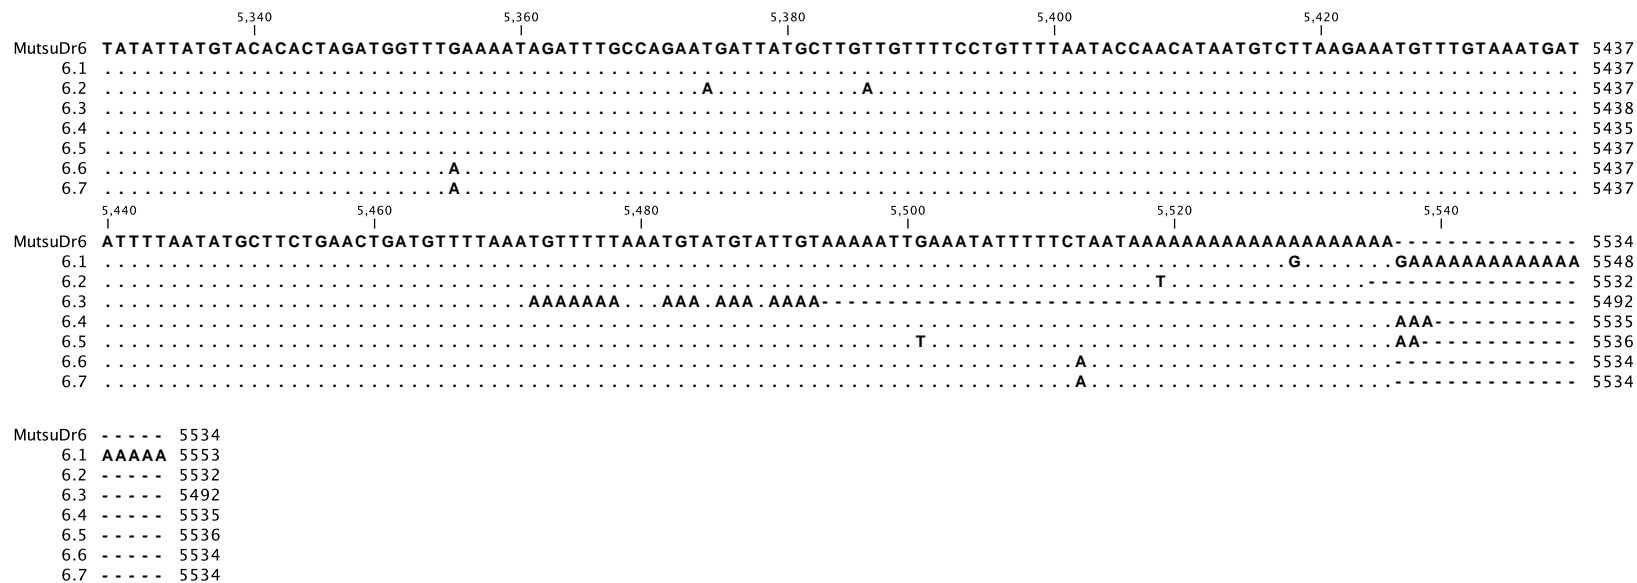

Supplemental Figure S9

|          |                                                                                                                        |     |     |     |     |     |      |
|----------|------------------------------------------------------------------------------------------------------------------------|-----|-----|-----|-----|-----|------|
|          |                                                                                                                        | 20  | 40  | 60  | 80  | 100 |      |
| MutsuDr7 | <b>GAAATGCCTGAGGCGCTATTGAGCAAGGAAGGAAGTGTGAAGATTGGTAGAAGAAGTAGTGTGAGAACACTTTTTGTTTTGAAAGCTTTTTTTT-CTTTCTAGTTTTTGG</b>  |     |     |     |     |     | 110  |
| 7.1      | .....T.....                                                                                                            |     |     |     |     |     | 111  |
| 7.2      | .....                                                                                                                  |     |     |     |     |     | -    |
| 7.3      | .....                                                                                                                  |     |     |     |     |     | 110  |
| 7.4      | .....C.....A.....T.....                                                                                                |     |     |     |     |     | 111  |
| 7.5      | .....                                                                                                                  |     |     |     |     |     | 109  |
| 7.6      | .....A..CT..CTAGT.....                                                                                                 |     |     |     |     |     | 111  |
|          |                                                                                                                        | 120 | 140 | 160 | 180 | 200 | 220  |
| MutsuDr7 | <b>TTGTTTTTTT-TT-AAGAAGACCAAAAGAGGATCAAGAAGGTTTTTAGTTGGAGTTTATCACTCCCCTCAGCATTGCTGTTTGGGGAATCTTTATTTTTGTTTGT</b>       |     |     |     |     |     | 219  |
| 7.1      | .....C..T.....                                                                                                         |     |     |     |     |     | 222  |
| 7.2      | .....                                                                                                                  |     |     |     |     |     | -    |
| 7.3      | .....C..T.....                                                                                                         |     |     |     |     |     | 221  |
| 7.4      | .....C.....                                                                                                            |     |     |     |     |     | 220  |
| 7.5      | .....                                                                                                                  |     |     |     |     |     | 217  |
| 7.6      | .....C.....T.....A.....                                                                                                |     |     |     |     |     | 220  |
|          |                                                                                                                        | 240 | 260 | 280 | 300 | 320 |      |
| MutsuDr7 | <b>CTACTGGACTGCTAAAGACAACGGCTAAACAGCATTAAAGATGGAAAAACAAGAGGTGAGCAGATTGTAAGCATGGATGGAGATGATGGCCAAGGAAGACGTGTTTTTCAG</b> |     |     |     |     |     | 330  |
| 7.1      | .....                                                                                                                  |     |     |     |     |     | 333  |
| 7.2      | .....                                                                                                                  |     |     |     |     |     | -    |
| 7.3      | .....                                                                                                                  |     |     |     |     |     | 332  |
| 7.4      | .....T.....                                                                                                            |     |     |     |     |     | 331  |
| 7.5      | .....G.....                                                                                                            |     |     |     |     |     | 328  |
| 7.6      | .....                                                                                                                  |     |     |     |     |     | 331  |
|          |                                                                                                                        | 340 | 360 | 380 | 400 | 420 | 440  |
| MutsuDr7 | <b>AAAAAGCTAACAGTATTGGTTGAAATTGTGGGAGAAGATAAAATTACAATGATGGAGCTTTTGAAGAAAGTGAGAGAAGATTGGTGTGTAATTGGCTGCAGATATAAG</b>    |     |     |     |     |     | 441  |
| 7.1      | .....                                                                                                                  |     |     |     |     |     | 444  |
| 7.2      | .....                                                                                                                  |     |     |     |     |     | A 10 |
| 7.3      | .....                                                                                                                  |     |     |     |     |     | 443  |
| 7.4      | .....A.....                                                                                                            |     |     |     |     |     | 442  |
| 7.5      | .....                                                                                                                  |     |     |     |     |     | 439  |
| 7.6      | .....                                                                                                                  |     |     |     |     |     | 442  |
|          |                                                                                                                        | 460 | 480 | 500 | 520 | 540 |      |
| MutsuDr7 | <b>AACCCAAAAGAGTATGAATTAACATGAATGAAGAGGAAGGGAAAGAAAAATACTGGATGGGCTGAAGATAAAAAACGCCGATAATGGTAAAGGAAATAACAACAAT</b>      |     |     |     |     |     | 552  |
| 7.1      | .....                                                                                                                  |     |     |     |     |     | 555  |
| 7.2      | .....                                                                                                                  |     |     |     |     |     | 121  |
| 7.3      | .....T.....                                                                                                            |     |     |     |     |     | 554  |
| 7.4      | .....G.....                                                                                                            |     |     |     |     |     | 553  |
| 7.5      | .....                                                                                                                  |     |     |     |     |     | 550  |
| 7.6      | .....                                                                                                                  |     |     |     |     |     | 553  |
|          |                                                                                                                        | 560 | 580 | 600 | 620 | 640 | 660  |
| MutsuDr7 | <b>GAGATGGTGGTCTCTTTTCTGAATCTGCCAACATACATTGAAGATGAGGAAATAATTGGAAAATACTGAATGGGGAGTGAAAGCAGCTTACCTGTCAAAAGGAGAATG</b>    |     |     |     |     |     | 663  |
| 7.1      | .....                                                                                                                  |     |     |     |     |     | 666  |
| 7.2      | .....A.....                                                                                                            |     |     |     |     |     | 232  |
| 7.3      | .....                                                                                                                  |     |     |     |     |     | 665  |
| 7.4      | .....                                                                                                                  |     |     |     |     |     | 664  |
| 7.5      | .....G.....                                                                                                            |     |     |     |     |     | 661  |
| 7.6      | .....                                                                                                                  |     |     |     |     |     | 664  |
|          |                                                                                                                        | 680 | 700 | 720 | 740 | 760 |      |
| MutsuDr7 | <b>TGGCCAGGAACGGATATTGCAGATGGAACACGATTTCTAAAAGTTAAGTTCACAGATACTGTGAAATCGCTACCATACTCAACAAAGTTTGAGACGCTGACAGGAACAGAA</b> |     |     |     |     |     | 774  |
| 7.1      | .....                                                                                                                  |     |     |     |     |     | 777  |
| 7.2      | .....                                                                                                                  |     |     |     |     |     | 343  |
| 7.3      | .....T.....                                                                                                            |     |     |     |     |     | 776  |
| 7.4      | .....T.....A.....G.....                                                                                                |     |     |     |     |     | 775  |
| 7.5      | .....A.....                                                                                                            |     |     |     |     |     | 772  |
| 7.6      | .....                                                                                                                  |     |     |     |     |     | 775  |

Supplemental Figure S9

|          |  |                                                                                                                                                                                                                               |  |       |  |       |  |       |  |       |  |       |  |      |
|----------|--|-------------------------------------------------------------------------------------------------------------------------------------------------------------------------------------------------------------------------------|--|-------|--|-------|--|-------|--|-------|--|-------|--|------|
|          |  | 780                                                                                                                                                                                                                           |  | 800   |  | 820   |  | 840   |  | 860   |  | 880   |  |      |
| MutsuDr7 |  | C A T T T T A G G G T C A T A C A T G A C A G A C A G G T G A A A G T C T G C A G A G T C T G T A T C C A A C C A G G A C A C A T T G T A A G A G A C T G C C C T A A C T T T A A G T G T T A T A A A T G T G G C A T T C A G |  |       |  |       |  |       |  |       |  |       |  | 885  |
| 7.1      |  | ..... T .....                                                                                                                                                                                                                 |  |       |  |       |  |       |  |       |  |       |  | 888  |
| 7.2      |  | .....                                                                                                                                                                                                                         |  |       |  |       |  |       |  |       |  |       |  | 454  |
| 7.3      |  | .....                                                                                                                                                                                                                         |  |       |  |       |  |       |  |       |  |       |  | 887  |
| 7.4      |  | .....                                                                                                                                                                                                                         |  |       |  |       |  |       |  |       |  |       |  | 886  |
| 7.5      |  | .....                                                                                                                                                                                                                         |  |       |  |       |  |       |  |       |  |       |  | 883  |
| 7.6      |  | .....                                                                                                                                                                                                                         |  |       |  |       |  |       |  |       |  |       |  | 886  |
|          |  | 900                                                                                                                                                                                                                           |  | 920   |  | 940   |  | 960   |  | 980   |  |       |  |      |
| MutsuDr7 |  | G G T C A T T A T G T G C G C G A A T G T G A C A A A G G A A A A T G C A A G T T G T G T A A G A T G G T C A C T G C A A T G T G T G T A T G C A G A A T T C C A G A G G A A G A A A T C A T G G G A A G C T C T C T G G A T |  |       |  |       |  |       |  |       |  |       |  | 996  |
| 7.1      |  | .....                                                                                                                                                                                                                         |  |       |  |       |  |       |  |       |  |       |  | 999  |
| 7.2      |  | .....                                                                                                                                                                                                                         |  |       |  |       |  |       |  |       |  |       |  | 565  |
| 7.3      |  | .....                                                                                                                                                                                                                         |  |       |  |       |  |       |  |       |  |       |  | 998  |
| 7.4      |  | ..... G .....                                                                                                                                                                                                                 |  |       |  |       |  |       |  |       |  |       |  | 997  |
| 7.5      |  | .....                                                                                                                                                                                                                         |  |       |  |       |  |       |  |       |  |       |  | 994  |
| 7.6      |  | .....                                                                                                                                                                                                                         |  |       |  |       |  |       |  |       |  |       |  | 997  |
|          |  | 1,000                                                                                                                                                                                                                         |  | 1,020 |  | 1,040 |  | 1,060 |  | 1,080 |  | 1,100 |  |      |
| MutsuDr7 |  | C T A T A T G A A A G T G T G G A G G A G G C A A T A A C A G G A A A G G A A A A A G A T G A A G A A G A T G A A C A G A A T G A A G A A G A T A T A A T G G T A G A A C G A A G G G C T G G A G A A G A A G T A C A A G A G |  |       |  |       |  |       |  |       |  |       |  | 1107 |
| 7.1      |  | ..... C .....                                                                                                                                                                                                                 |  |       |  |       |  |       |  |       |  |       |  | 1110 |
| 7.2      |  | ..... A .....                                                                                                                                                                                                                 |  |       |  |       |  |       |  |       |  |       |  | 676  |
| 7.3      |  | ..... C .....                                                                                                                                                                                                                 |  |       |  |       |  |       |  |       |  |       |  | 1109 |
| 7.4      |  | .....                                                                                                                                                                                                                         |  |       |  |       |  |       |  |       |  |       |  | 1108 |
| 7.5      |  | .....                                                                                                                                                                                                                         |  |       |  |       |  |       |  |       |  |       |  | 1105 |
| 7.6      |  | .....                                                                                                                                                                                                                         |  |       |  |       |  |       |  |       |  |       |  | 1108 |
|          |  | 1,120                                                                                                                                                                                                                         |  | 1,140 |  | 1,160 |  | 1,180 |  | 1,200 |  | 1,220 |  |      |
| MutsuDr7 |  | C C G A T G G A T G A C T C A C A A G A T G C C A T G G G A A A A T T C C C G C A G A A G C A A G T G G T T C A A G A G G A A G A G G A A T T A T T A T T T G A A G G A G G A G G G A A T G G T A A G A A G G A G G T C A A   |  |       |  |       |  |       |  |       |  |       |  | 1218 |
| 7.1      |  | ..... A .....                                                                                                                                                                                                                 |  |       |  |       |  |       |  |       |  |       |  | 1221 |
| 7.2      |  | ..... T .....                                                                                                                                                                                                                 |  |       |  |       |  |       |  |       |  |       |  | 787  |
| 7.3      |  | ..... A .....                                                                                                                                                                                                                 |  |       |  |       |  |       |  |       |  |       |  | 1220 |
| 7.4      |  | ..... A .....                                                                                                                                                                                                                 |  |       |  |       |  |       |  |       |  |       |  | 1219 |
| 7.5      |  | ..... A .....                                                                                                                                                                                                                 |  |       |  |       |  |       |  |       |  |       |  | 1216 |
| 7.6      |  | ..... A .....                                                                                                                                                                                                                 |  |       |  |       |  |       |  |       |  |       |  | 1219 |
|          |  | 1,240                                                                                                                                                                                                                         |  | 1,260 |  | 1,280 |  | 1,300 |  | 1,320 |  |       |  |      |
| MutsuDr7 |  | G A A A A G C G A C C A A G A T G G G A A G G A G C A C A A G G A A A T C A A G G G G A A G A G A C T T C A T G A C A A G A A T T T A G A G A C A C C A C T G A T A C A A C T G G A G G A G G A A A T G G A C A T G           |  |       |  |       |  |       |  |       |  |       |  | 1329 |
| 7.1      |  | ..... G .....                                                                                                                                                                                                                 |  |       |  |       |  |       |  |       |  |       |  | 1332 |
| 7.2      |  | .....                                                                                                                                                                                                                         |  |       |  |       |  |       |  |       |  |       |  | 898  |
| 7.3      |  | .....                                                                                                                                                                                                                         |  |       |  |       |  |       |  |       |  |       |  | 1331 |
| 7.4      |  | ..... T .....                                                                                                                                                                                                                 |  |       |  |       |  |       |  |       |  |       |  | 1330 |
| 7.5      |  | ..... A .....                                                                                                                                                                                                                 |  |       |  |       |  |       |  |       |  |       |  | 1327 |
| 7.6      |  | ..... T .....                                                                                                                                                                                                                 |  |       |  |       |  |       |  |       |  |       |  | 1330 |
|          |  | 1,340                                                                                                                                                                                                                         |  | 1,360 |  | 1,380 |  | 1,400 |  | 1,420 |  | 1,440 |  |      |
| MutsuDr7 |  | A G T G C C G G A A A T A T C A A G A T G C T G A A A A G G A A A A T G A A A G G C A C T G A A G A A G A G A C T A C A A A A A A G T A A G A T C T G A A G A C A T T T T C A A A T G T G G G T T C T C C T C T T T T T A T   |  |       |  |       |  |       |  |       |  |       |  | 1440 |
| 7.1      |  | ..... C .....                                                                                                                                                                                                                 |  |       |  |       |  |       |  |       |  |       |  | 1443 |
| 7.2      |  | .....                                                                                                                                                                                                                         |  |       |  |       |  |       |  |       |  |       |  | 1009 |
| 7.3      |  | .....                                                                                                                                                                                                                         |  |       |  |       |  |       |  |       |  |       |  | 1442 |
| 7.4      |  | ..... G .....                                                                                                                                                                                                                 |  |       |  |       |  |       |  |       |  |       |  | 1441 |
| 7.5      |  | ..... G .....                                                                                                                                                                                                                 |  |       |  |       |  |       |  |       |  |       |  | 1438 |
| 7.6      |  | ..... G .....                                                                                                                                                                                                                 |  |       |  |       |  |       |  |       |  |       |  | 1441 |
|          |  | 1,460                                                                                                                                                                                                                         |  | 1,480 |  | 1,500 |  | 1,520 |  | 1,540 |  |       |  |      |
| MutsuDr7 |  | A C T A T A T G C A A T G T G T G A C T T G C T G A A A A T T G C C T G T T T G A A C T G C A A T G G A C T A A G A G A A A T G G A A A A G T T T G A G A G G G T G A T T A G A A A G T T C A A A A C A G A T G T A A T T T G |  |       |  |       |  |       |  |       |  |       |  | 1551 |
| 7.1      |  | .....                                                                                                                                                                                                                         |  |       |  |       |  |       |  |       |  |       |  | 1554 |
| 7.2      |  | .....                                                                                                                                                                                                                         |  |       |  |       |  |       |  |       |  |       |  | 1120 |
| 7.3      |  | .....                                                                                                                                                                                                                         |  |       |  |       |  |       |  |       |  |       |  | 1553 |
| 7.4      |  | .....                                                                                                                                                                                                                         |  |       |  |       |  |       |  |       |  |       |  | 1552 |
| 7.5      |  | .....                                                                                                                                                                                                                         |  |       |  |       |  |       |  |       |  |       |  | 1549 |
| 7.6      |  | .....                                                                                                                                                                                                                         |  |       |  |       |  |       |  |       |  |       |  | 1552 |

Supplemental Figure S9

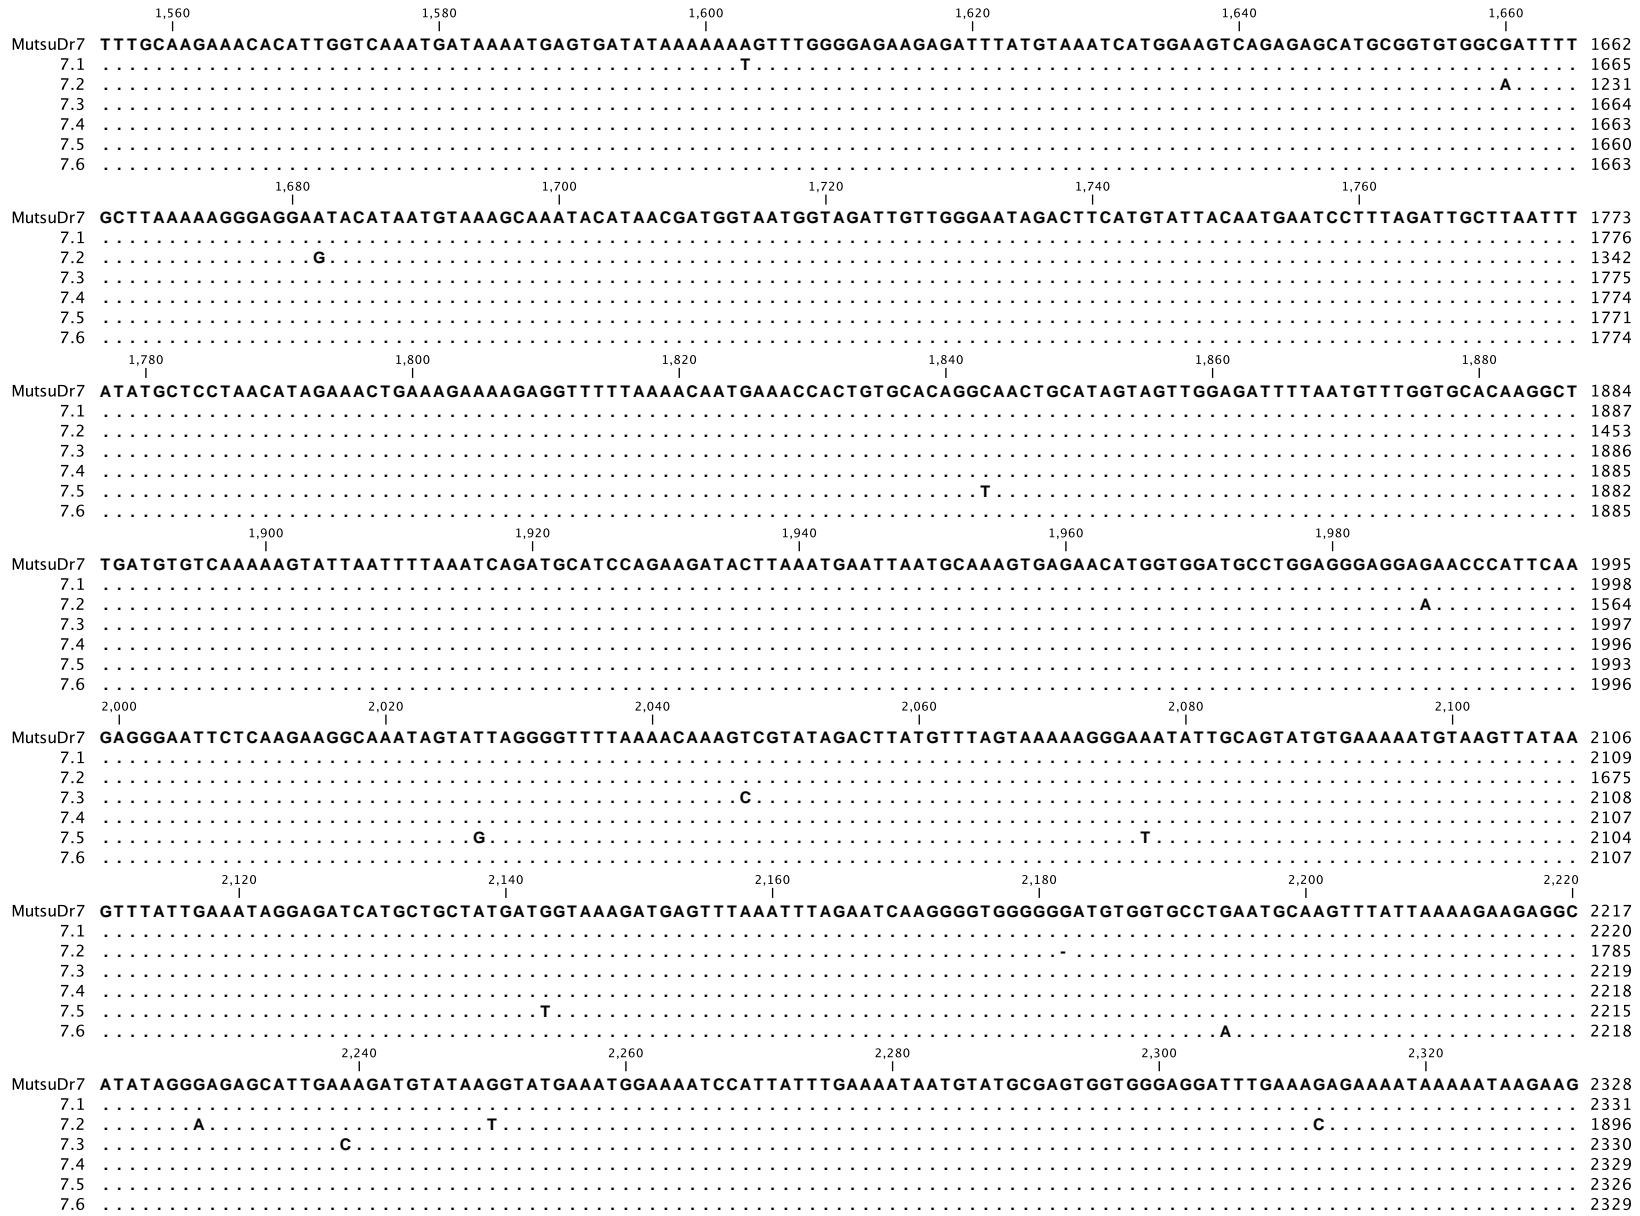

Supplemental Figure S9

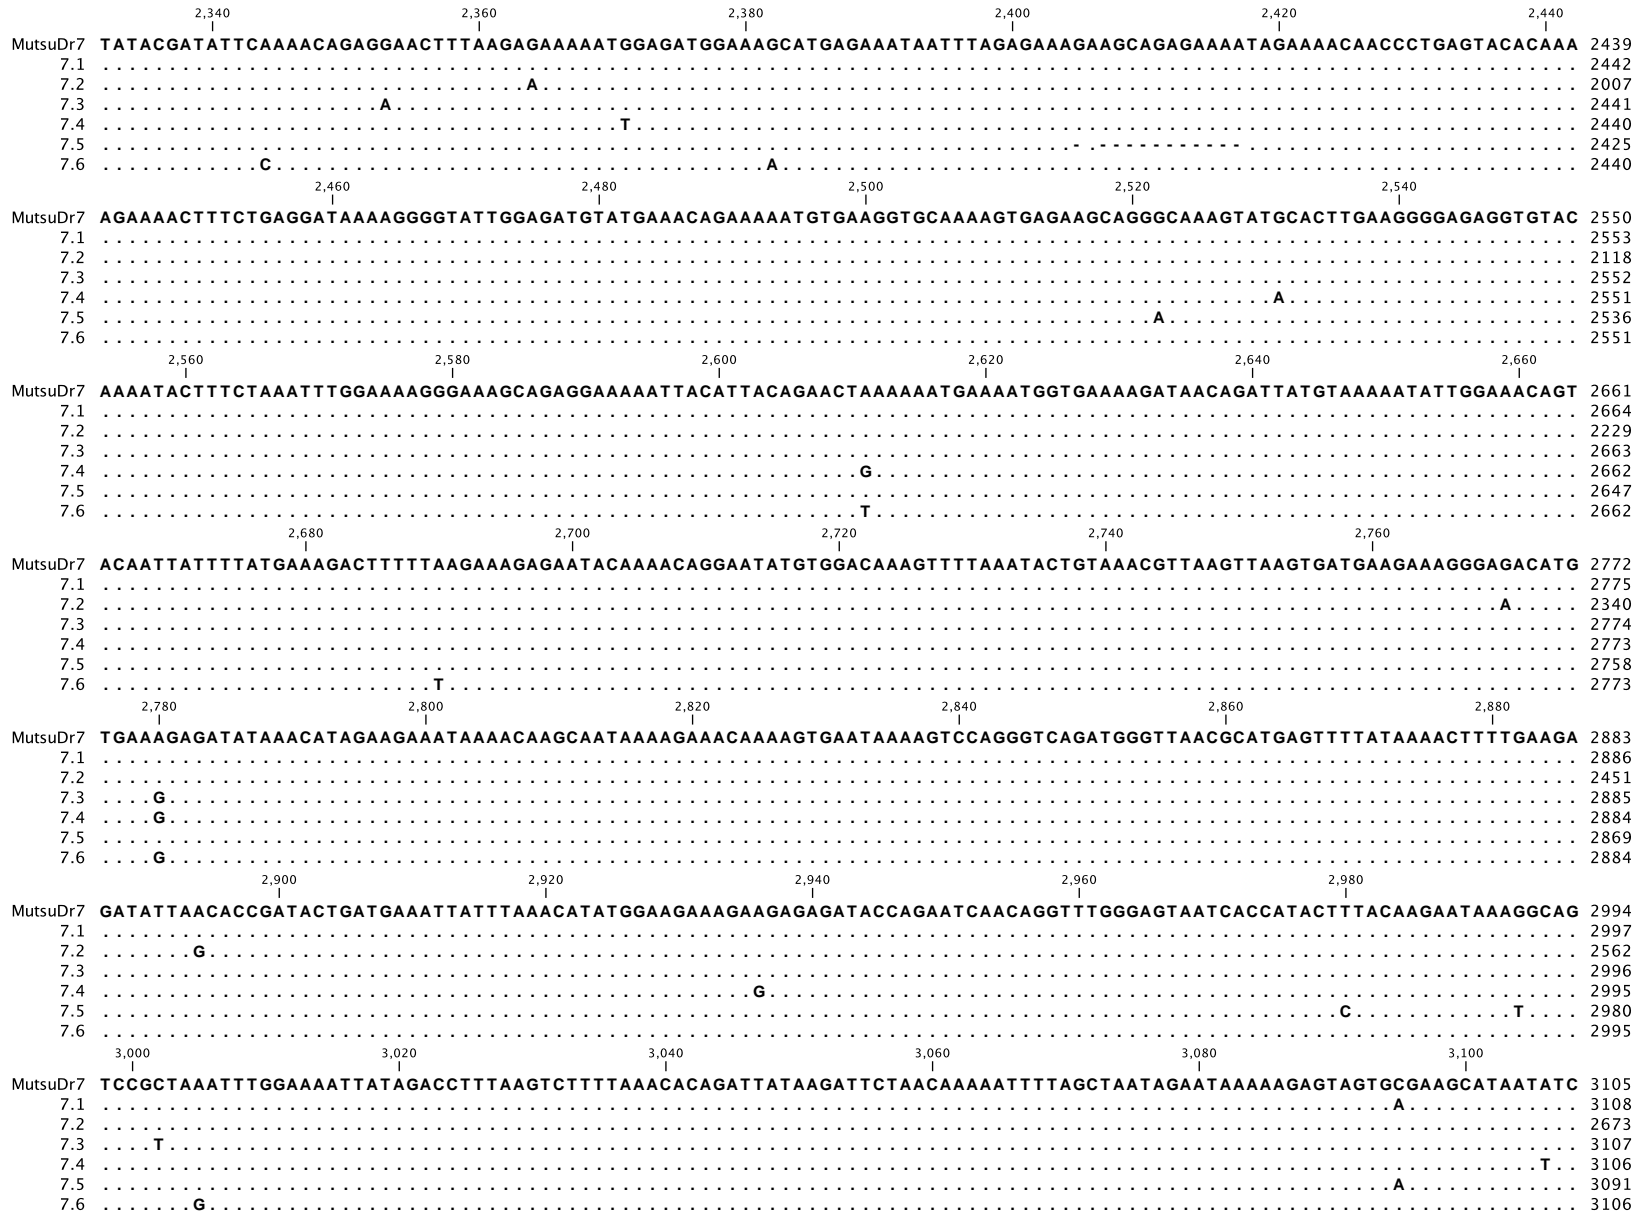

Supplemental Figure S9

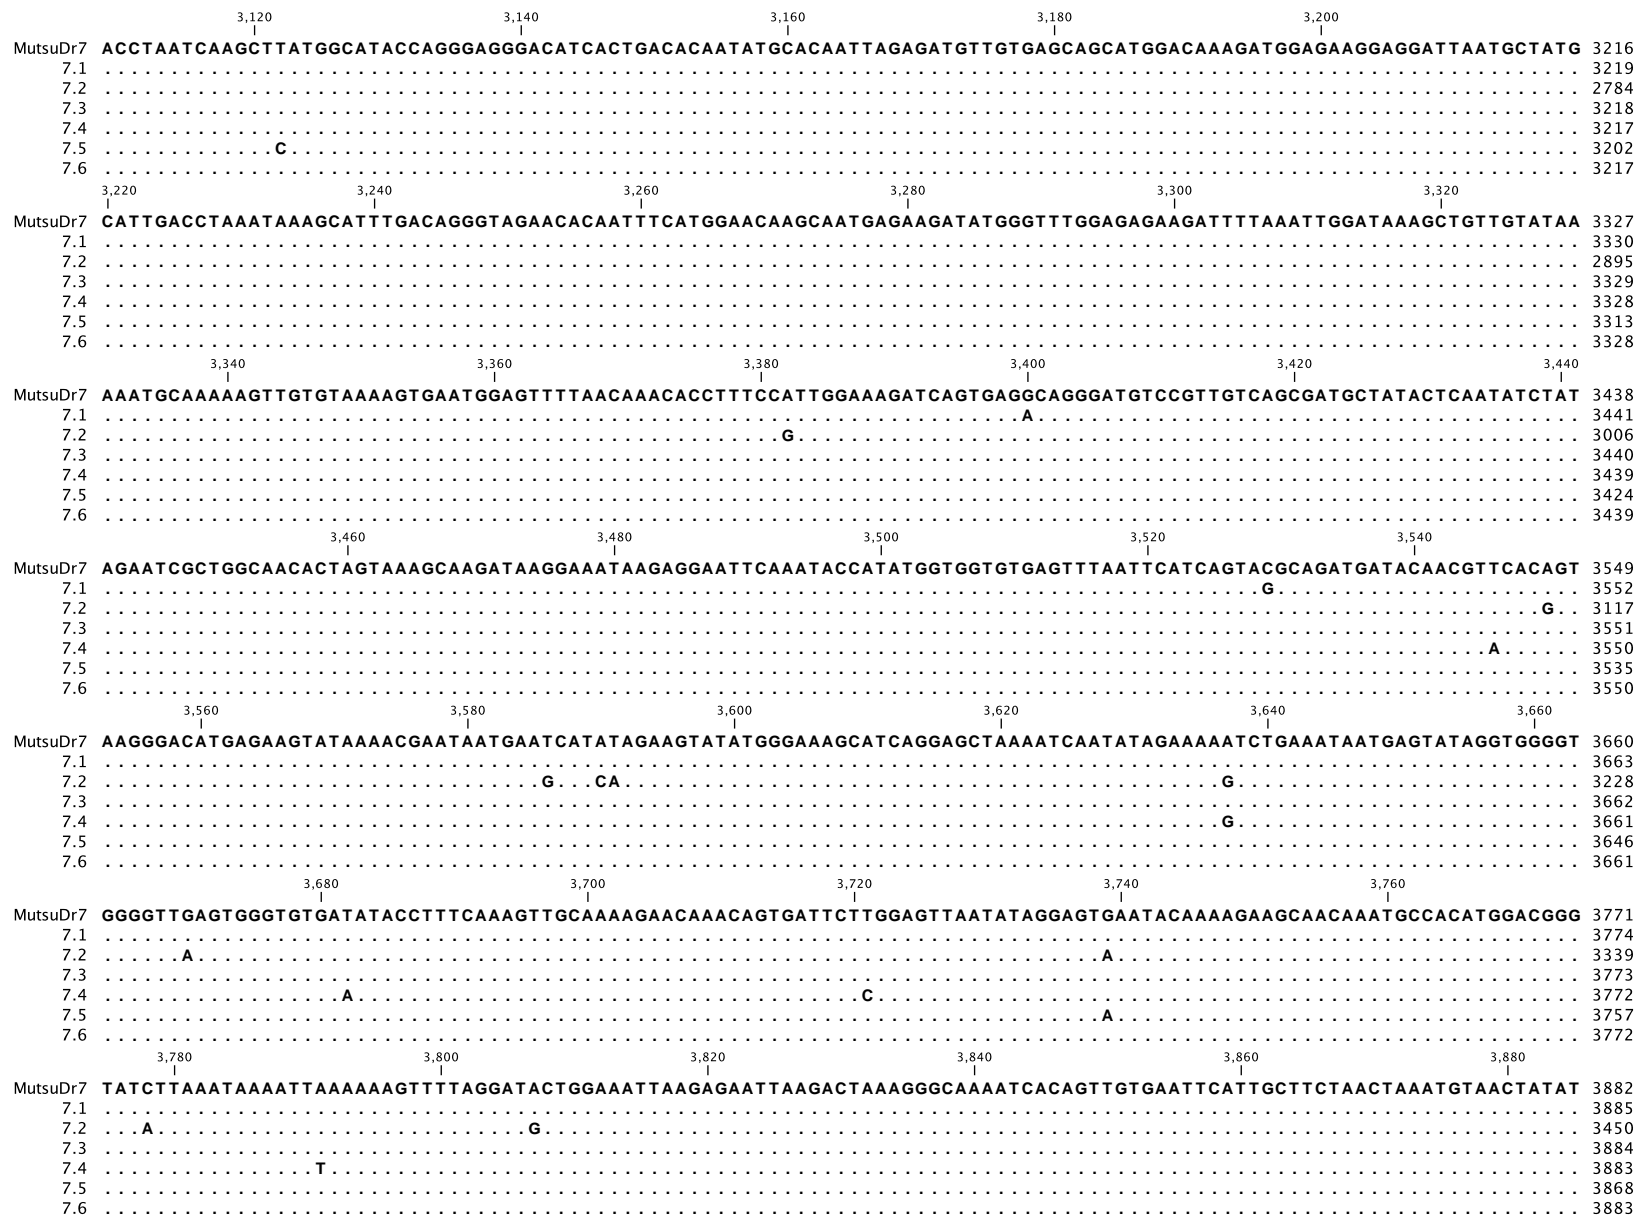



Supplemental Figure S9

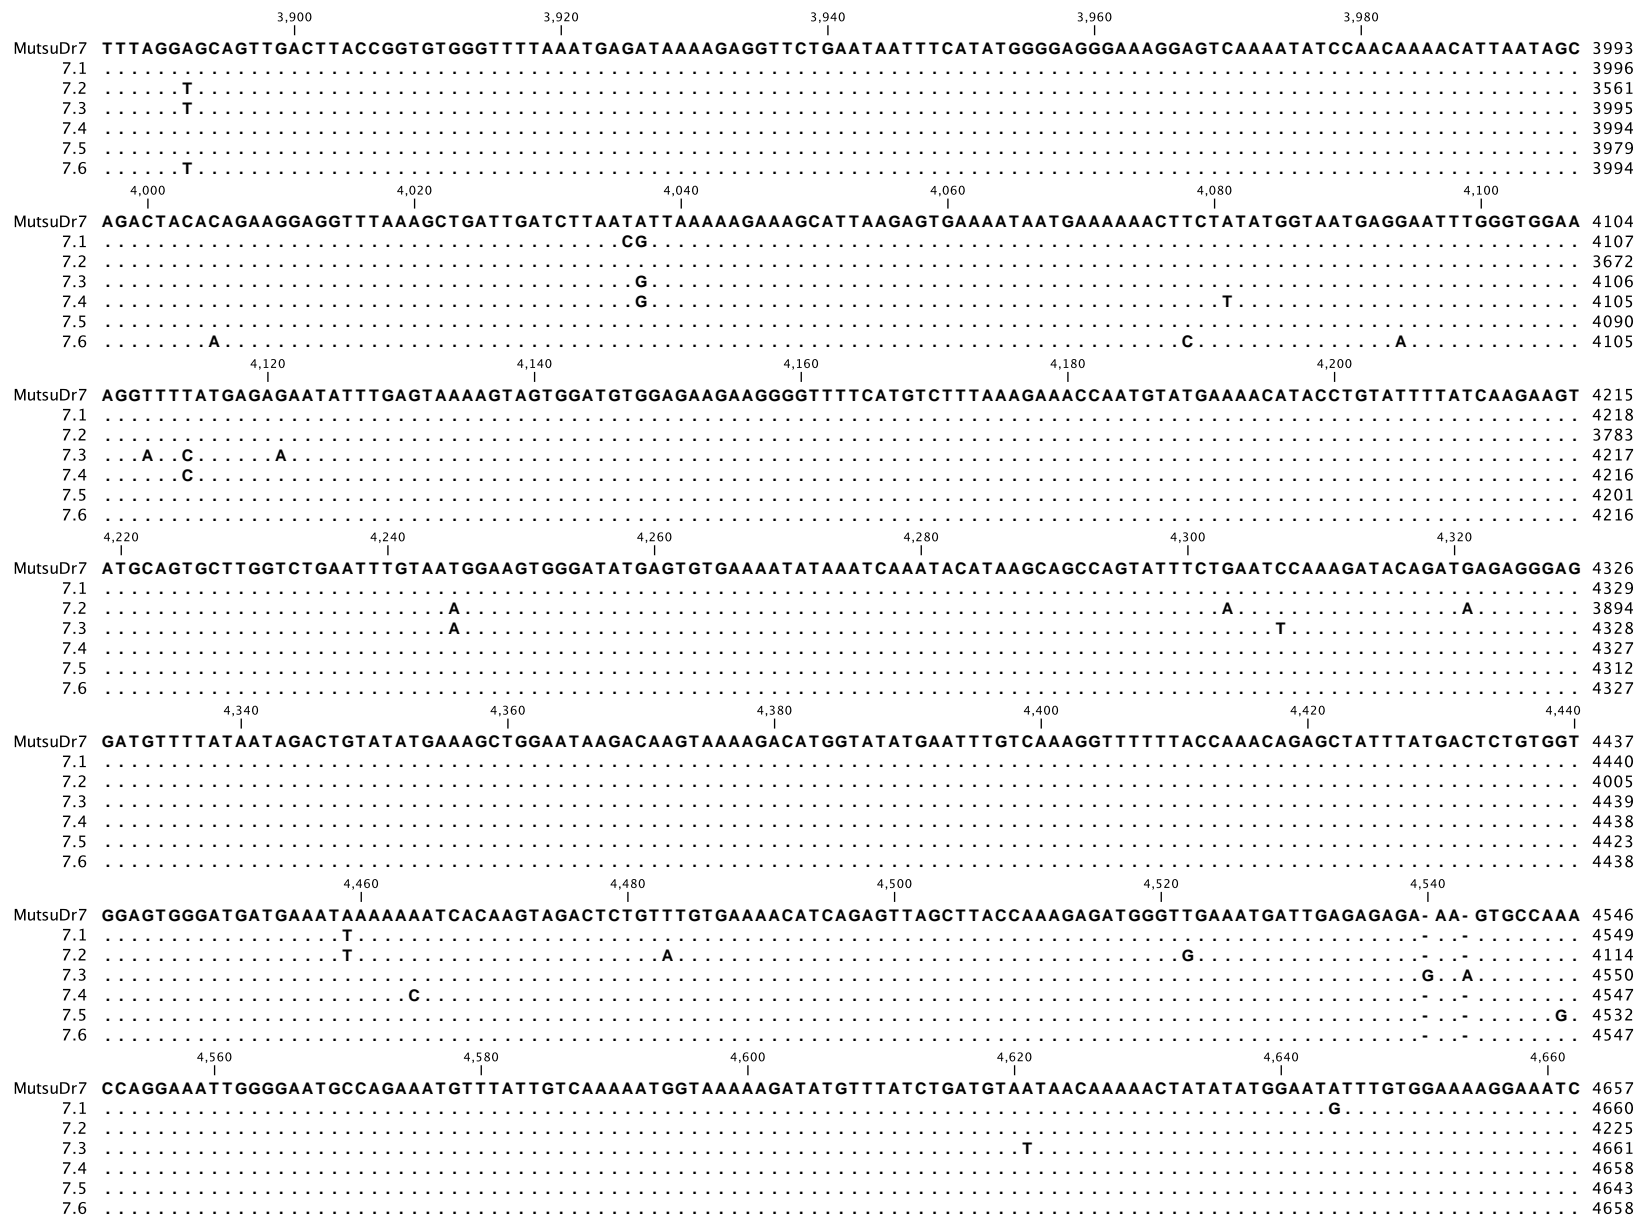

Supplemental Figure S9

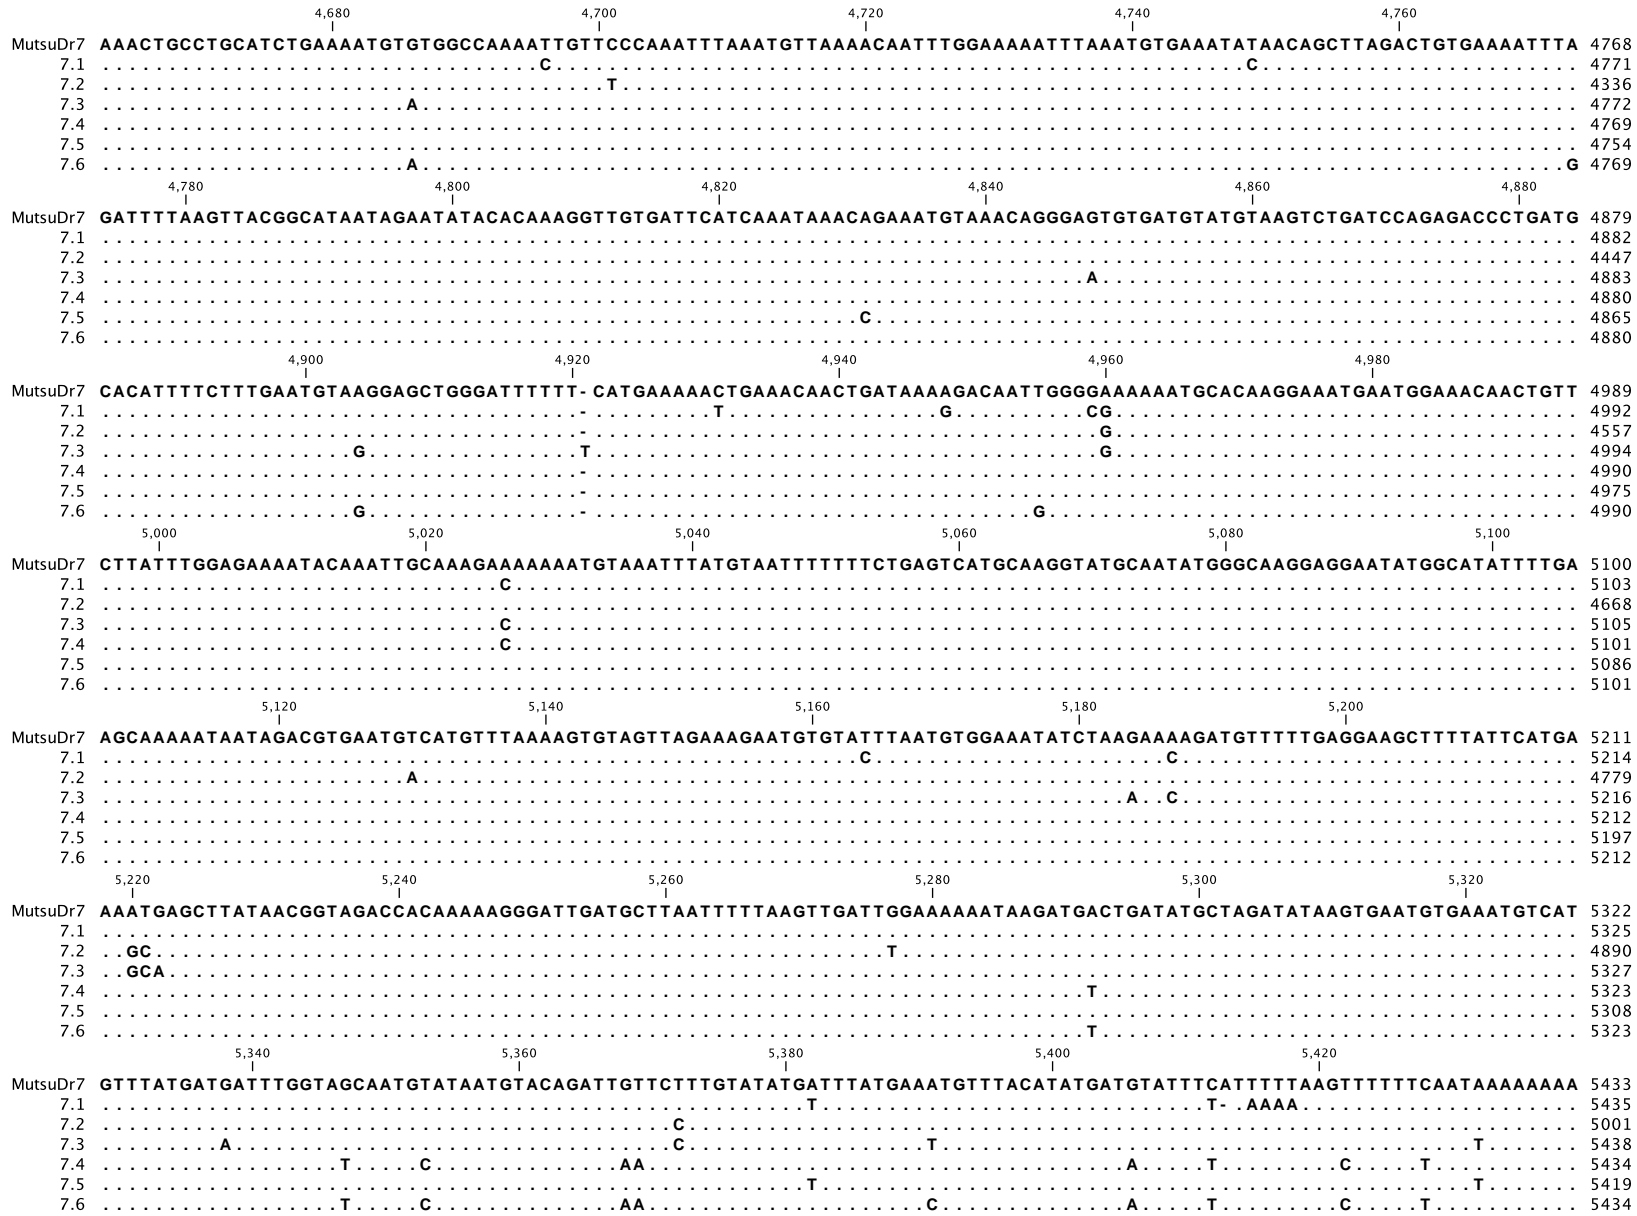

Supplemental Figure S9

|          |                      |         |       |      |
|----------|----------------------|---------|-------|------|
|          | 5,440                |         | 5,460 |      |
|          |                      |         |       |      |
| MutsuDr7 | AAAAAAAAAAAAAAAAAAAA | -----   |       | 5453 |
| 7.1      | .....                | AAAAAAA |       | 5463 |
| 7.2      | .....                | AAAAAAA |       | 5029 |
| 7.3      | .....                | -----   |       | 5454 |
| 7.4      | .....                | -----   |       | 5443 |
| 7.5      | .....                | -----   |       | 5439 |
| 7.6      | .....                | -----   |       | 5443 |
