# Supplementary material for: Linking maternal and somatic 5S rRNA types with different sequence-specific non-LTR retrotransposons
Source: PubMed Central journal article supplement — RNA. 2017 Apr;23(4):446–56. doi: 10.1261/rna.059642.116 (PMC5340908; doi:10.1261/rna.059642.116), 2017-04
Supplement: supp_059642.116_Supplemental_Fig_S10.pdf [file supp_059642.116_Supplemental_Fig_S10.pdf]

|           |                                                                                                                                                      |    |    |    |     |                                                                                                                                       |     |
|-----------|------------------------------------------------------------------------------------------------------------------------------------------------------|----|----|----|-----|---------------------------------------------------------------------------------------------------------------------------------------|-----|
|           | 20                                                                                                                                                   | 40 | 60 | 80 | 100 |                                                                                                                                       |     |
| Consensus | -----                                                                                                                                                |    |    |    |     | EGKGDGLKEGSLXNDTGLEDET NXAND- N- LXNRQQM- GNKKKQA- GGR                                                                                | 45  |
| 1.1       | -----                                                                                                                                                |    |    |    |     | MD . TVT . LAMA . GVEK . K . . . G . DR . . RETNQSE . E . - RK .                                                                      | 40  |
| 1.4       | -----                                                                                                                                                |    |    |    |     | MD . TVT . LAMA . GVEK . . . . . G . DR . . RETNQSE . E . - RK .                                                                      | 40  |
| 1.6       | -----                                                                                                                                                |    |    |    |     | MD . TVT . LAMA . GVEK . . . . . G . DR . . REPNQSE . E . - RK .                                                                      | 40  |
| 1.7       | -----                                                                                                                                                |    |    |    |     | MD . TVT . LAMA . GVEK . . . . . G . DR . . RETNQSE . E . - RK .                                                                      | 40  |
| 1.8       | -----                                                                                                                                                |    |    |    |     | MD . TVT . LAMA . GVEK . . . . . G . DR . . RETNQSE . E . - RK .                                                                      | 40  |
| 1.9       | -----                                                                                                                                                |    |    |    |     | MD . TVT . LAMA . GVEK . . . . . G . DR . . RETNQSE . E . - RK .                                                                      | 40  |
| 1.11      | -----                                                                                                                                                |    |    |    |     | MD . TVT . LAMA . GVEK . . . . . G . DR . . RETNQSE . E . - RK .                                                                      | 40  |
| 2.2       | -----                                                                                                                                                |    |    |    |     | MEQTKDGLMANDPGLDA . TRKEYE . . . D . . . RMVK . . . G . E . G . RA . . QR . S . V . . .                                               | 55  |
| 2.4       | -----                                                                                                                                                |    |    |    |     | MEQTKDGLMANDPGLDA . TRKEYE . . . D . . . RMVK . . . G . E . G . RA . . QR . S . V . . .                                               | 55  |
| 2.5       | -----                                                                                                                                                |    |    |    |     | MEQTKDGLMANDPGLDA . TRKEYE . . . D . . . RMVK . . . G . E . G . RA . . QR . S . V . . .                                               | 55  |
| 2.7       | -----                                                                                                                                                |    |    |    |     | MEQTKDGLMANDPGLDA . TRKEYE . . . D . . . RMVK . . . G . E . G . RA . . QR . S . V . . .                                               | 55  |
| 2.8       | -----                                                                                                                                                |    |    |    |     | MEQTKDGLMANDPGLDA . TRKEYE . . . D . . . RMVK . . . G . E . G . RA . . QR . S . V . . .                                               | 55  |
| 2.10      | -----                                                                                                                                                |    |    |    |     | MEQTKDGLMANDPGLDA . TRKEYE . . . D . . . RMVK . . . G . E . G . RA . . QR . S . V . . .                                               | 55  |
| 2.11      | -----                                                                                                                                                |    |    |    |     | MEQTKDGLMANDPGLDA . TRKEYE . . . D . . . RMVK . . . G . E . G . RA . . QR . S . V . . .                                               | 55  |
| 3.1       | -----                                                                                                                                                |    |    |    |     | MMDSQSNSTD L FDEAHGEN I TGRSGERQK . NSTGLRG . RQ . E . N . . Q . G . R . MV . K . ERQE . Q . . E - MQQQR - S - . K                    | 73  |
| 3.3       | -----                                                                                                                                                |    |    |    |     | MMDSQSNSTD L FDEAHGEN I TGRSGERQK . NSTGLRG . RQ . E . N . . Q . G . R . MV . K . ERQE . Q . . E - MQQQR - S - . K                    | 73  |
| 3.4       | -----                                                                                                                                                |    |    |    |     | MMDSQSNSTD L FDDAHGEN I TGRSGERQK . NSTGLQG . RQ . E . N . . Q . G . R . MV . K . ERQE . Q . . E - MQQQR - S - . K                    | 73  |
| S3.1      | MQRHERNLKQDWMTR I EWLKTTDWK I D N ELDNGKAKMHGETA L F FWDKHKHEKKN TGLAGERQKGN GTTSQ E . RR I E . NN . QVR . . . TP . K . EQWGKQ . . E - RQERRS - . EK |    |    |    |     | 108                                                                                                                                   |     |
| 4.1       | -----                                                                                                                                                |    |    |    |     | MDTTEKENGQD TNRKRNSEQGNATNMLERTRNEDAGENSNETWATVVSKKKEGKG . GQE . K . N . QSIASI . S . K . TEGQM . A . SQK . . . LNKL . . . . . RYQ .  | 101 |
| 4.3       | -----                                                                                                                                                |    |    |    |     | MDTTEKENGQD TNGKRNREQGNATNMLERTRNEDAGENSNETWATVVSKKKEGKG . GQE . K . N . QSIASI . S . K . TEGQM . A . SQK . . . LNKL . . . . . RYQ .  | 101 |
| 4.4       | -----                                                                                                                                                |    |    |    |     | MDTTEKENGQD TNGKRNREQGNATNMLERTRNEDAGENSNETWATVVSKKKEGKG . GQE . K . D . QSIASI . SVK . TEGQR . A . SQK . . . LNKL . . . . . RSQ .    | 101 |
| 4.5       | -----                                                                                                                                                |    |    |    |     | MDTTEKENGQD TNGKRNREQGNATNMLERTRNEDAGENSNETWATVVSKKKEGKG . GQE . K . N . QSIASI . S . K . TEGQM . A . SQK . . . LNKL . . . . . RYQ .  | 101 |
| 4.6       | -----                                                                                                                                                |    |    |    |     | MDTTEKENGQD TNGKRNREQGNATNMLERTRNEDAGENSNETWATVVSKKKEGKG . GQE . K . N . QSIASI . S . K . TEGQM . A . SQK . . . LNKL . . . . . RYQ .  | 101 |
| 4.9       | -----                                                                                                                                                |    |    |    |     | MDTTEKENGQD TNGKRNREQGNATNMLERTRNEDAGENSNETWATVVSKKKEGKG . GQE . K . D . QSIASI . SVK . TEGQR . A . SQK . . . LNKL . . . . . RSQ .    | 101 |
| 4.10      | -----                                                                                                                                                |    |    |    |     | MDTMEKENGQD TNGKRNREQGNATNMLERTQNE DARENSNETWATVVSKKKEGKG . . QE . K . D . QSTAI I . SVK . TEGQR . A . SQK . . . LNKI . . . . . RYQ . | 101 |
| 4.11      | -----                                                                                                                                                |    |    |    |     | MDTMEKENGQD TNGKRNREQGNATNMLERTQNE DARENSNETWATVVSKKKEGKG . . QE . K . D . QSTASI . SVK . TEGQR . A . SQK . . . LNKI . . . . . RYQ .  | 101 |
| 4.12      | -----                                                                                                                                                |    |    |    |     | MDTTEKENGQD TNEERNGEQGNATNMFERTRNEDAGENSNETWATVVSKKKEGKGCGQE . K . D . QSNASI . S . K . IEGQR . A . SQK . . . LNKL . . . . . RYQ .    | 101 |
| 4.14      | -----                                                                                                                                                |    |    |    |     | MDTTEKENGQD TNGKRNREQGNATNMLERTRNEDAGENSNETWATVVSKKKEGKG . GQE . K . N . QSIASI . S . K . TEEQM . A . SQK . . . LNKL . . . . . RYQ .  | 101 |
| 4.15      | -----                                                                                                                                                |    |    |    |     | MDTTEKENGQD TNGKRNREQGNATNMLERTRNEDAEENSNETWATVVSKKKEGKG . GQE . K . N . QSIASI . S . K . TEGQM . A . SQK . . . LNKL . . . . . RYQ .  | 101 |
| 5.3       | -----                                                                                                                                                |    |    |    |     | MESTKDKFTGLSGKTRGENNT EMDGEKQRGDDTGVREGKQMG . N . A QGG . . . M . M - ERQE . . . Q - - ERQHER - R . K                                 | 73  |
| 5.5       | -----                                                                                                                                                |    |    |    |     | MESTKDKFTGLSGKTRGESNT EMDGEKQRGDDTGVREGKQMG . N . A RGG . . . M . M - ERQE . . . Q - - ERQHER - R . K                                 | 73  |
| 5.6       | -----                                                                                                                                                |    |    |    |     | MESTKDKFTGLSGKTRGENNT EMDGEKQRGDDTGVREGKQMG . N . A QGG . . . M . M - ERQE . . . Q - - ERQHER - R . K                                 | 73  |
| 6.1       | -----                                                                                                                                                |    |    |    |     | MADGCTATNTDMAGETRLVKDNLGAGGTRKA I D IGLGG . T . TA . . N . . AGG . SK . . E - . G . DK . PRNGNKTE . SKFAE .                           | 78  |
| 6.2       | -----                                                                                                                                                |    |    |    |     | MADGCTATNTDMAGETRLVKDNLGAGGTRKA I D IGLGG . T . TA . . N . . AGG . SK . . E - . G . DK . PRNGNKTE . SKFAE .                           | 78  |
| 6.3       | -----                                                                                                                                                |    |    |    |     | MADGCTATNTDMAGETRLVKDNLGAGGTRKA I D IGLGG . T . TA . . N . . AGG . SK . . E - . G . DK . PRNGNKTE . SKFAE .                           | 78  |
| 6.5       | -----                                                                                                                                                |    |    |    |     | MADGCTATNTDMAGETRLVKDNLGAGGTRKA I D IGLGG . T . TA . . N . . AGG . SK . . E - . G . DK . PRNGNKTE . SKFAE .                           | 78  |
| 6.6       | -----                                                                                                                                                |    |    |    |     | MADGYTATNTDMAGETRLVKDNLGAGGTRKA I D IGLGG . T . TA . . N . . AGG . SK . . E - . G . DK . PRNGNKTE . SKFAE .                           | 78  |
| 6.7       | -----                                                                                                                                                |    |    |    |     | MADGYTATNTDMAGETRLVKDNLGAGGTRKA I D IGLGG . T . TA . . N . . AGG . SK . . E - . G . DK . PRNGNKTE . SKFAE .                           | 78  |
| 7.1       | -----                                                                                                                                                |    |    |    |     | MEKQRGE . I V SMDGDDGQ . R .                                                                                                          | 21  |
| 7.3       | -----                                                                                                                                                |    |    |    |     | MEKQRGE . I V SMDGDDGQ . R .                                                                                                          | 21  |
| 7.4       | -----                                                                                                                                                |    |    |    |     | MEKQRGE . I V SLDGDDGQ . R .                                                                                                          | 21  |
| 7.5       | -----                                                                                                                                                |    |    |    |     | MEKQRGE . I V SMDGDDGQ . R .                                                                                                          | 21  |
| 7.6       | -----                                                                                                                                                |    |    |    |     | MEKQRGE . I V SMDGDDGQ . R .                                                                                                          | 21  |

|           | 120      | 140                  | 160             | 180                           | 200             | 220                             |                         |                         |                        |                          |                 |
|-----------|----------|----------------------|-----------------|-------------------------------|-----------------|---------------------------------|-------------------------|-------------------------|------------------------|--------------------------|-----------------|
| Consensus | KYLKEATV | IINVEDVEEVRAEDI      | IKAVTEKCGXGKI   | LALRPKQNKEYELTMESEEECEKLLDGLM | INGENCEVKKLQNRD | YVVSFLHLPVYLEDEE                | ILEKLDGWGVCPI SKI 157   |                         |                        |                          |                 |
| 1.1       | I        | .....TVDIGQAT        | ...M.V.....RI.D | ...V...H...V.L.R.             | DADE.T.E.T.K.I  | A.R.....M.....VA.KD             | .D...H..... 152         |                         |                        |                          |                 |
| 1.4       | I        | .....TVDIGQAT        | ...M.V.....RI.D | ...V...H...V.L.R.             | DADE.T.E.T.K.I  | A.R.....M.....VA.KD             | .D...Y..... 152         |                         |                        |                          |                 |
| 1.6       | I        | .....TVEIGQAT        | ...M.V.....RI.D | ...V...H...V.L.R.             | DADE.T.E.T.K.I  | A.R.....M.....VA.KD             | .D.F.H..... 152         |                         |                        |                          |                 |
| 1.7       | I        | .....TVDIGQAT        | ...M.V.....RI.D | ...V...H...V.L.R.             | DADE.T.E.T.K.I  | A.R.....M.....VA.KD             | .D...H..... 152         |                         |                        |                          |                 |
| 1.8       | I        | .....TVDIGQAT        | ...M.V.....RI.D | ...V...H...V.L.R.             | DADE.T.E.T.K.I  | A.R.....M.....VA.KD             | .D...Y..... 152         |                         |                        |                          |                 |
| 1.9       | I        | .....TVDIGQAT        | ...M.V.....RI.D | ...V...H...V.L.R.             | DADE.T.E.T.K.I  | A.R.....M.....VA.KD             | .D...Y..... 152         |                         |                        |                          |                 |
| 1.11      | I        | .....TVDIGQAT        | ...M.V.....RI.D | ...VV...H...V.LKR.            | DADE.T.E.T.K.I  | A.R.....M.....VA.KD             | .D...H..... 152         |                         |                        |                          |                 |
| 2.2       | .....    | .....Q.....I         | .....H.....R.G  | .....T.L.Q.T.K                | .....V...I      | .....H...F...M.....K.....T..... | ..... 167               |                         |                        |                          |                 |
| 2.4       | .....    | .....K.....I         | .....H.....R.G  | .....T.L.Q.T.K                | .....V...I      | .....H...F...M.....K.....T..... | ..... 167               |                         |                        |                          |                 |
| 2.5       | .....    | .....Q.....I         | .....H.....R.G  | .....T.L.Q.T.K                | .....V...I      | .....H...F...M.....K.....T..... | ..... 167               |                         |                        |                          |                 |
| 2.7       | .....    | .....K.....I         | .....H.....R.G  | .....T.L.Q.T.K                | .....V...I      | .....H...F...M.....K.....T..... | ..... 167               |                         |                        |                          |                 |
| 2.8       | .....    | .....K.....I         | .....H.....R.G  | .....T.L.Q.T.K                | .....V...I      | .....H...F...M.....K.....T..... | ..... 167               |                         |                        |                          |                 |
| 2.10      | .....    | .....Q.....I         | .....H.....R.G  | .....T.L.Q.T.K                | .....V...I      | .....H...F...M.....K.....T..... | ..... 167               |                         |                        |                          |                 |
| 2.11      | .....    | .....Q.....I         | .....H.....R.G  | .....T.L.Q.T.K                | .....V...I      | .....H...F...M.....K.....T..... | ..... 167               |                         |                        |                          |                 |
| 3.1       | .M.....  | .....L.DK.K          | .....VLE.N      | .....L.....I                  | .....RDD.D      | .....L.N.T.D                    | .M...IK.T...M.....M.A.D | QL.D...E...F...T... 185 |                        |                          |                 |
| 3.3       | .M.....  | .....L.DK.K          | .....VLE.N      | .....L.....I                  | .....RDD.D      | .....L.N.T.D                    | .M...IK.T...M.....M.A.D | QL.D...E...F...T... 185 |                        |                          |                 |
| 3.4       | .M.....  | .....L.MDK.K         | .....VLE.N      | .....L.....I                  | .....RDD.D      | .....L.N.T.D                    | .M...IK.T...M.....M.A.D | QL.D...E...F...T... 185 |                        |                          |                 |
| S3.1      | .K.....  | .....L.L.DKIK        | .....VL.N       | .....I.....H.....I            | .....R.E.Q      | .....I.F.T                      | .T.D...K.K...S.....M.A  | QI.D...E...F...DF 220   |                        |                          |                 |
| 4.1       | E.K..... | .....LTMMIK          | .....NSTINN     | .....ED.V                     | .....I.LIG      | .....R.N.N.F                    | .....K...I              | IN.....E.....CATEKM     | .....N.S.IQ            | .....QQ.VSN              | .....T...LP 213 |
| 4.3       | E.K..... | .....LTMMIK          | .....NSTINN     | .....ED.V                     | .....I.LIG      | .....R.N.N.F                    | .....K...I              | IN.....E.....CATEKM     | .....N.S.IQ            | .....QQ.SN               | .....T...LP 213 |
| 4.4       | E.K..... | .....LTMM.R          | .....I.NATINN   | .....ED.V                     | .....I.LG       | .....R.N.N.F                    | .....K...I              | IN.....E.M...CATEKM     | .....N.S.IQ            | .....QQ.SN               | .....T...LP 213 |
| 4.5       | E.K..... | .....LTMMIK          | .....NSTINN     | .....ED.V                     | .....I.LIG      | .....R.N.N.F                    | .....K...I              | IN.....E.....CATEKM     | .....N.S.IQ            | .....QQ.SN               | .....T...LP 213 |
| 4.6       | E.K..... | .....LTMMIK          | .....NSTINN     | .....ED.V                     | .....I.LIG      | .....R.N.N.F                    | .....K...I              | IN.....E.....CATEKM     | .....N.S.IQ            | .....QQ.SN               | .....T...LP 213 |
| 4.9       | E.K..... | .....LTMM.R          | .....I.NATINN   | .....ED.V                     | .....I.LG       | .....R.N.N.F                    | .....K...I              | IN.....E.M...CATEKM     | .....N.S.IQ            | .....QQ.SN               | .....T...LP 213 |
| 4.10      | E.K..... | .....LTMM.R          | .....I.NSTINN   | .....ED.V                     | .....I.LG       | .....R.N.N.F                    | .....K...I              | IN.....E.M...CATEKM     | .....N.S.IQ            | .....QQ.SN               | .....T...LP 213 |
| 4.11      | E.K..... | .....LTMM.R          | .....I.NSTINN   | .....ED.V                     | .....I.LG       | .....R.N.N.F                    | .....K...I              | IN.....E.M...CATEKM     | .....N.S.IQ            | .....QQ.SN               | .....T...LP 213 |
| 4.12      | E.K..... | .....LTMM.R          | .....I.NATINN   | .....ED.V                     | .....I.LG       | .....R.N.N.F                    | .....K...I              | IN.....E.M...CATEKM     | .....N.S.IQ            | .....D.QQ.SN             | .....T...LP 213 |
| 4.14      | E.K..... | .....LTMMIK          | .....NSTINN     | .....ED.V                     | .....I.LIG      | .....R.N.N.F                    | .....K...V              | IN.....E.....CATEKM     | .....N.S.IQ            | .....QQ.SN               | .....T...LP 213 |
| 4.15      | E.K..... | .....LTMMIK          | .....NSTINN     | .....ED.V                     | .....I.LIG      | .....R.N.N.F                    | .....K...I              | IN.....E.....CATGKM     | .....N.S.IQ            | .....QQ.SN               | .....T...LP 213 |
| 5.3       | .....    | .....L.DK.K          | .....VS.....L   | .....H.R                      | .....I.RKD      | .....I.L.E                      | .....T.D                | .....I.T.E              | .....M.....M.....SV    | .....S.L... 185          |                 |
| 5.5       | .....    | .....L.DK.K          | .....VS.....L   | .....H.R                      | .....I.RKD      | .....I.L.E                      | .....T.D                | .....I.T.E              | .....M.....M.....SV    | .....S.L... 185          |                 |
| 5.6       | .....    | .....L.DK.K          | .....VS.....L   | .....H.R                      | .....I.RKD      | .....I.L.E                      | .....T.D                | .....I.T.E              | .....M.....M.....SV    | .....S.L... 185          |                 |
| 6.1       | .....    | .....N.L.K           | .....V.IM       | .....Q.M                      | .....R.G        | .....K.....E                    | .....T.V                | .....S.H.....NSI        | .....V.E...E.LT... 190 |                          |                 |
| 6.2       | .....    | .....N.L.K           | .....V.IM       | .....Q.M                      | .....R.G        | .....K.....E                    | .....T.V                | .....S.H.....NSI        | .....V.E...E.LT... 190 |                          |                 |
| 6.3       | .....    | .....N.L.K           | .....V.IM       | .....Q.M                      | .....R.G        | .....K.....E                    | .....T.V                | .....S.H.....NSI        | .....V.E...E.LT... 190 |                          |                 |
| 6.5       | .....    | .....N.L.K           | .....V.IM       | .....Q.M                      | .....R.G        | .....K.....E                    | .....T.V                | .....S.H.....NSI        | .....V.E...E.LT... 190 |                          |                 |
| 6.6       | .....    | .....N.L.K           | .....V.IM       | .....Q.M                      | .....R.G        | .....K.....E                    | .....T.V                | .....S.H.....NSI        | .....V.E...E.LT... 190 |                          |                 |
| 6.7       | .....    | .....N.L.K           | .....V.IM       | .....Q.M                      | .....R.G        | .....K.....E                    | .....T.V                | .....S.H.....NSI        | .....V.E...E.LT... 190 |                          |                 |
| 7.1       | VFQ.KL.. | .....LVEIVGEDKITMELL | .....K.R.D      | .....V--VIGC                  | .....Y.NP       | .....NE.GK                      | .....I...K.KNSRIM       | .....EIN.NEM            | .....N.T.I             | .....IG..TE...KAA.PV 131 |                 |
| 7.3       | VFQ.KL.. | .....LVEIVGEDKITMELL | .....K.R.D      | .....V--VIGC                  | .....Y.NP       | .....NE.GK                      | .....I...K.KNSLIM       | .....EIN.NEM            | .....N.T.I             | .....IG..TE...KAA.PV 131 |                 |
| 7.4       | VFQ.KL.. | .....LVEIVGEDKITMELL | .....K.R.D      | .....V--VIGC                  | .....Y.NP       | .....NE.GK                      | .....I...KVKNSRIM       | .....EIN.NEM            | .....N.T.I             | .....IG..TE...KAA.PV 131 |                 |
| 7.5       | VFQ.KL.. | .....LVEIVGEDKITMELL | .....K.R.D      | .....V--VIGC                  | .....Y.NP       | .....NE.GK                      | .....I...K.KNSRIM       | .....EIN.NEM            | .....N.T.I             | .....IG..TE...KAA.PV 131 |                 |
| 7.6       | VFQ.KL.. | .....LVEIVGEDKITMELL | .....K.R.D      | .....V--VIGC                  | .....Y.NP       | .....NE.GK                      | .....I...K.KNSRIM       | .....EIN.NEM            | .....N.T.I             | .....IG..TE...KAA.PV 131 |                 |

|           | 240        | 260                      | 280                 | 300                     | 320                      |                  |       |    |       |
|-----------|------------|--------------------------|---------------------|-------------------------|--------------------------|------------------|-------|----|-------|
| Consensus | KRRFYPGTDI | EDGTRFLKVRFPKEVASLPYSTXF | ETAEGPQYFRVMHSHQVKT | CRLCMSPEHXVKDCPNFKCYKCE | EERGHFARDCTTVKCEPKRFLNKC | ECWMEEEEEEG- 268 |       |    |       |
| 1.1       | N          | V.T                      | RI                  | D.V                     | D.R                      | KF.A             | D.NKV | G  | V-    |
| 1.4       | N          | V.T                      | RI                  | D.V                     | D.R                      | KF.A             | D.NKV | G  | V-    |
| 1.6       | N          | V.T                      | RI                  | D.V                     | D.R                      | KF.A             | D.NKV | G  | V-    |
| 1.7       | N          | V.T                      | RI                  | D.V                     | D.R                      | KF.A             | D.NKV | G  | V-    |
| 1.8       | N          | V.T                      | RI                  | D.V                     | D.R                      | KF.A             | D.NKV | G  | V-    |
| 1.9       | N          | V.T                      | RI                  | D.V                     | D.R                      | KF.A             | D.NKV | G  | V-    |
| 1.11      | N          | V.T                      | RI                  | D.V                     | D.R                      | KF.A             | D.NKV | G  | V-    |
| 2.2       |            |                          | KM.T                | ML                      | E                        | I                | R     | N  | G.GG- |
| 2.4       |            |                          | KM.T                | ML                      | E                        | I                | R     | N  | G.GG- |
| 2.5       |            | E                        | KM.T                | ML                      | E                        | I                | R     | N  | G.GG- |
| 2.7       |            |                          | KM.T                | ML                      | E                        | I                | R     | N  | G.GG- |
| 2.8       |            |                          | KM.T                | ML                      | E                        | I                | R     | N  | G.GG- |
| 2.10      |            |                          | KM.T                | ML                      | E                        | H                | I     | R  | N     |
| 2.11      |            |                          | KM.T                | ML                      | E                        | H                | I     | R  | N     |
| 3.1       | V          | E                        | Y                   | R                       | I                        | RL               | Q     | D  | M     |
| 3.3       | V          | E                        | Y                   | R                       | I                        | RL               | Q     | D  | M     |
| 3.4       | V          | E                        | Y                   | R                       | I                        | RL               | Q     | D  | M     |
| S3.1      | L          | E                        | H                   | I                       | A                        | I                | KL    | M  | L     |
| 4.1       | R          | KYH                      | MVA                 | V                       | K                        | K                | NVG   | M  | E     |
| 4.3       | R          | KYH                      | MVA                 | V                       | K                        | K                | NVG   | M  | E     |
| 4.4       | R          | KYH                      | MVA                 | VR                      | K                        | K                | NVG   | M  | E     |
| 4.5       | R          | KYH                      | MVA                 | V                       | K                        | K                | NVG   | M  | E     |
| 4.6       | R          | KYH                      | MVA                 | V                       | K                        | K                | NVG   | M  | E     |
| 4.9       | R          | KYH                      | MVA                 | VR                      | K                        | K                | NVG   | M  | E     |
| 4.10      | R          | KYH                      | MVA                 | VR                      | K                        | K                | NVG   | M  | E     |
| 4.11      | R          | KYH                      | MVA                 | VR                      | K                        | K                | NVG   | M  | E     |
| 4.12      | R          | KYH                      | MVA                 | VR                      | K                        | K                | NVG   | M  | E     |
| 4.14      | R          | KYH                      | MVA                 | V                       | K                        | K                | NVG   | M  | E     |
| 4.15      | R          | KYH                      | MVA                 | V                       | K                        | K                | NVG   | M  | E     |
| 5.3       | T          | E                        | I                   | T                       | K                        | VM               | D     | R  | F     |
| 5.5       | T          | E                        | I                   | T                       | K                        | VM               | D     | R  | F     |
| 5.6       | T          | E                        | I                   | T                       | K                        | VM               | D     | R  | F     |
| 6.1       | C          |                          |                     | RL                      | H                        | R                | Q     | D  | LL    |
| 6.2       | C          |                          |                     | RL                      | H                        | R                | Q     | D  | LL    |
| 6.3       | C          |                          |                     | RL                      | H                        | R                | Q     | D  | LL    |
| 6.5       | C          |                          |                     | RL                      | H                        | R                | Q     | D  | LL    |
| 6.6       | C          |                          | L                   | RL                      | H                        | R                | Q     | D  | LL    |
| 6.7       | C          |                          |                     | RL                      | H                        | R                | Q     | D  | LL    |
| 7.1       | MW         | A                        |                     | K                       | TDT                      | K                | K     | LT | TEH   |
| 7.3       | MW         | A                        |                     | K                       | TDT                      | K                | K     | LT | TEH   |
| 7.4       | ML         | N                        | A                   | K                       | TDT                      | K                | K     | LT | TEH   |
| 7.5       | MW         | A                        |                     | K                       | TDT                      | K                | K     | LT | TEH   |
| 7.6       | MW         | A                        |                     | K                       | TDT                      | K                | K     | LT | TEH   |

|           |                                                                                                                       |     |     |     |     |     |     |
|-----------|-----------------------------------------------------------------------------------------------------------------------|-----|-----|-----|-----|-----|-----|
|           | 340                                                                                                                   | 360 | 380 | 400 | 420 | 440 |     |
| Consensus | EI QVSRQVHEGNN-KE-EEDEE-AN-Q--EERTE-EE-KLMENEG-M---X-E-EG---ENR-E-----GEEQNEENX-I ELSGEE-RQD-X--TXQ-EI XAXXKVR LMD FE |     |     |     |     |     | 350 |
| 1.1       | .Q..G..MY..D.IQS-...DKTTT..EKRTES.S.KLQEN.TN.-IDRVT..Q..TTWTQMDMT--DSLKSVL.AAELSDSNNKDLN.GQQED.FWTQMDMT-DSFQKALD      |     |     |     |     |     | 366 |
| 1.4       | .Q..G..MY..D.IQS-...DKTTT..EKRTES.S.KLQEN.TN.-IDRVT..Q..TTWTQMDMT--DSLKSVL.AAELSDSNNKDLN.GQQED.FWTQMDMT-DSFQKALD      |     |     |     |     |     | 366 |
| 1.6       | .Q..G..MY..D.IQS-...DKTTT..EKRTES.S.KLQEN.TN.-IDRVT..Q..TTWTQMDMT--DSLKSVL.AAELSDSNNKDLN.GQQED.FWTQMDMT-DSFQKALD      |     |     |     |     |     | 366 |
| 1.7       | .Q..G..MY..D.IQS-...DKTTT..EKRTES.S.KLQEN.TN.-IDRVT..Q..TTWTQMDMT--DSLKSVL.AAELSDSNNKDLN.GQQED.FWTQMDMT-DSFQKALD      |     |     |     |     |     | 366 |
| 1.8       | .Q..G..MY..D.IQS-...DKTTT..EKRTES.S.KLQEN.TN.-IDRVT..Q..TTWTQMDMT--DSLKSVL.AAELSDSNNKDLN.GQQED.FWTQMDMT-DSFQKALD      |     |     |     |     |     | 366 |
| 1.9       | .Q..G..MY..D.IQS-...DKTTT..EKRTES.S.KLQEN.TN.-IDRVT..Q..TTWTQMDMT--DSLKSVL.AAELSDSNNKDLN.GQQED.FWTQMDMT-DSFQKALD      |     |     |     |     |     | 366 |
| 1.11      | .Q..G..MY..D.IQS-...DKTTT..EKRTES.S.KLQEN.TN.-IDRVT..Q..TTWTQMDMT--DSLKSVL.AAELSDSNNKDLN.GQQED.FWTQMDMT-DSFQKALD      |     |     |     |     |     | 366 |
| 2.2       | .D-.D.....E...NR-.D-.....AI-.....RT..E.....N-N-N-...KK-.....NE.....E-VQ...QD-G...W--SQM-...SDSF.TF.STV.               |     |     |     |     |     | 349 |
| 2.4       | .D-.D.....E...NR-.D-.....AI-.....RT..E.....N-N-N-...KK-.....NE.....E-VQ...QD-G...W--SQM-...SDSF.TF.STV.               |     |     |     |     |     | 349 |
| 2.5       | .D-.D.....E...R...D-.....AI-.....RT..E.....N-N-N-...KK-.....NE...KE-VQ...QD-G...W--SQM-...SDSF.TF.STM.                |     |     |     |     |     | 350 |
| 2.7       | .D-.D.....E...NR-.D-.....AI-.....RT..E.....N-N-N-...KK-.....NE.....E-VQ...QD-G...W--SQM-...SDSF.TF.STV.               |     |     |     |     |     | 349 |
| 2.8       | .D-.D.....E...NR-.D-.....AI-.....RT..E.....N-N-N-...KK-.....NE.....E-VQ...QD-G...W--SQM-...SDSF.TF.STV.               |     |     |     |     |     | 349 |
| 2.10      | .DR-D.....E...R...D-.....AI-.....RT..E.....N-N-N-...GKK-.....NE.....E-VQ...QD-G...W--SQM-...SDSF.TF.STV.              |     |     |     |     |     | 350 |
| 2.11      | .DR-D.....E...R...D-.....AI-.....RT..E.....N-N-N-...KK-.....NE.....E-VQ...QD-G...W--SQM-...SDSF.TF.STV.               |     |     |     |     |     | 350 |
| 3.1       | ...G.M...S-EK-...S-...EEEQTT.QT--IQTTE...I---TLKE.NAKK.KEK.TETD-SQQIEH.EE-VAWTPMDITSSFKNVLDVI.KEDL-.EQSKGTD           |     |     |     |     |     | 390 |
| 3.3       | ...G.M...S-EK-...S-...EEEQTT.QT--IQTTE...I---TLKE.NAKK.KEK.TETD-SQQIEH.EE-VAWTPMDITSSFKNVLDVI.KEDL-.EQSKGTD           |     |     |     |     |     | 390 |
| 3.4       | ...G.M...S-EK-...S-...EEEQTT.QT--IQTTE...I---TLKE.NAKK.KEK.TETD-SQQIEH.EE-VAWTPMDITSSFKNVLDVI.KEDL-.EQSKGTD           |     |     |     |     |     | 390 |
| S3.1      | .N...G.M...R-EN-...S-...EVEKTTA.V--QQTITD...I---T-DE.VTKGKK.K.T-D-IQQTEQ.ED-LVWTPMDITPSFKSLDAT.NEVL-.EQTKET.          |     |     |     |     |     | 423 |
| 4.1       | .T-.ASLENTATE-RK-...DK-TG-EENNTE-...D--RNEQEDKE-...ELG-...ANK.EG-...PNNRQFA.EQNDEDT...NN-...EK-.RTEDNEIRAI NEVRAMD    |     |     |     |     |     | 416 |
| 4.3       | .T-.ASLENTATE-RK-...DK-TG-EENNTE-...D--RNEQEDKE-...ELG-...ANK.EG-...PNNRQFA.EQNDEDT...NN-...EK-.RTEDNEIRAI NEVRAMD    |     |     |     |     |     | 416 |
| 4.4       | .T-.ASLENTATE-RK-...DK-TG-EENNTE-...D--RNEQEDKE-...ELG-...ANK.EG-...PNNRQFA.EQNDEDT...NN-...EK-.RTEDNEIRAI NEVRAMD    |     |     |     |     |     | 416 |
| 4.5       | .T-.ASLENTATE-RK-...DK-TG-EENNTE-...D--RNEQEDKE-...ELG-...ANK.EG-...PNNRQFA.EQNDEDT...NN-...EK-.RTEDNEIRAI NEVRAMD    |     |     |     |     |     | 416 |
| 4.6       | .T-.ASLENTATE-RK-...DK-TG-EENNTE-...D--RNEQEDKE-...ELG-...ANK.EG-...PNNRQFA.EQNDEDT...NN-...EK-.RTEDNEIRAI NEVRAMD    |     |     |     |     |     | 416 |
| 4.9       | .T-.ASLENTATE-RK-...DK-TG-EENNTE-...D--RNEQEDKE-...ELG-...ANK.EG-...PNNRQFA.EQNDEDT...NN-...EK-.RTEDNEIRAI NEVRAMD    |     |     |     |     |     | 416 |
| 4.10      | .T-.ASLENTATE-RK-...DK-TG-EENNTE-...D--RNEQEDKE-...ELG-...ANK.EG-...PNNRQFA.EQNDEDT...NN-...EK-.RTEDNEIRAI NEVRAMD    |     |     |     |     |     | 416 |
| 4.11      | .T-.ASLENTATE-RK-...DK-TG-EENNTE-...D--RNEQEDKE-...ELG-...ANK.EG-...PNNRQFA.EQNDEDT...NN-...EK-.RTEDNEIRAI NEVRAMD    |     |     |     |     |     | 416 |
| 4.12      | .T-.ASLENTATE-RK-...DK-TG-EENNTE-...D--RNEQEDKE-...ELG-...ANK.EG-...PNNRQFA.EQNDEDT...NN-...EK-.RTEDNEIRAI NEVRAMD    |     |     |     |     |     | 416 |
| 4.14      | .T-.ASLENTATE-RK-...DK-TG-EENNTE-...D--RNEQEDKE-...ELG-...ANK.EG-...PNNRQFA.EQNDEDT...NN-...EK-.RTEDNEIRAI NEVRAMD    |     |     |     |     |     | 416 |
| 4.15      | .T-.ASLENTATE-RK-...DK-TG-EENNTE-...D--RNEQEDKE-...ELG-...ANK.EG-...PNNRQFA.EQNDEDT...NN-...EK-.RTEDNEIRAI NEVRAMD    |     |     |     |     |     | 416 |
| 5.3       | RN.IN...KV..VEQN.G..Q.GVL.PKDLLK.IQNG.GIQEDKK.HKRN-NEDDIFC.E.H.E--ER.KM...A.ERLI.EER-.TLFKE.EKR.EEDNENIEMETMD         |     |     |     |     |     | 404 |
| 5.5       | RN.I...KV..VEQN.G..Q.GVL.PKDLLK.IQNG.GIQEDKK.HKRN-NEDDIFC.E.H.E--ER.KM...A.ERLI.EER-.TLFKE.EKR.EEDNENIEMETMD          |     |     |     |     |     | 404 |
| 5.6       | RN.IN...KV..VEQN.G..Q.GVL.PKDLLK.IQNG.GIQEDKK.HKRN-NEDDIFC.E.H.E--ER.KM...A.ERLI.EER-.TLFKE.EKR.EEDNENIEMETMD         |     |     |     |     |     | 404 |
| 6.1       | .K..D...Q...K-E-D--AKLEGD.EE.ATQQR.IEQ.KN.T.EV--VDFNED-...TK-...GGN-QMMEI.FSD-M.EN.Q.KIE-QNKDMDY-.ED.KVDNMDKCMK       |     |     |     |     |     | 398 |
| 6.2       | .K..D...Q...K-E-D--AKLEGD.EE.ATQQR.IEQ.KN.T.EV--VDFNED-...TK-...GGN-QMMEI.FSD-M.EN.Q.KIE-QNKDMDY-.ED.KVDNMDKCMK       |     |     |     |     |     | 398 |
| 6.3       | .K..D...Q...K-E-D--AKLEGD.EE.ATQQR.IEQ.KN.T.EV--VDFNED-...TK-...GGN-QMMEI.FSD-M.EN.Q.KIE-QNKDMDY-.ED.KVDNMDKCMK       |     |     |     |     |     | 398 |
| 6.5       | .K..D...Q...K-E-D--AKLEGD.EE.ATQQR.IEQ.KN.T.EV--VDFNED-...TK-...GGN-QMMEI.FSD-M.EN.Q.KIE-QNKDMDY-.ED.KVDNMDKCMK       |     |     |     |     |     | 398 |
| 6.6       | .K..D...Q...K-E-D--AKLEGD.EE.ATQQR.IEQ.KN.T.EV--VDFNED-...TK-...GGN-QMMEI.FSD-M.EN.Q.KIE-QNKDMDY-.ED.KVDNMDKCMK       |     |     |     |     |     | 398 |
| 6.7       | .K..D...Q...K-E-D--AKLEGD.EE.ATQQR.IEQ.KN.T.EV--VDFNED-...TK-...GGN-QMMEI.FSD-M.EN.Q.KIE-QNKDMDY-.ED.KVDNMDKCMK       |     |     |     |     |     | 398 |
| 7.1       | SLDLYES.EDAITG..KDE.DEQ-EE-DIMV.RRAGEEVQEP--D-D-SQDAM--GKFPQ--KQVVQEE..LL-F.GG.NGKKGQEK-AN-.DGKEH-.ENQRGRD            |     |     |     |     |     | 338 |
| 7.3       | SLDLYES.EDAITG..KDE.DEQ-EE-DIMV.RRAGEEVQEP--D-D-SQDAM--GKFPQ--KQVVQEE..LL-F.GG.NGKKGQEK-AN-.DGKEH-.ENQRGRD            |     |     |     |     |     | 338 |
| 7.4       | SLDLYES.E.AITG..KDE.DEQ-EE-DIMV.RRAGEEVQEP--D-D-SQDAM--GKFPQ--KQVVQEE..LL-F.GG.NGKKGQEK-AN-.DGKEH-.ENQRGRD            |     |     |     |     |     | 338 |
| 7.5       | SLDLYES.E.AITG..KDE.DEQ-EE-DIMV.RRAGEEVQEP--D-D-SQDAM--GKFPQ--KQVVQEE..LL-F.GG.NGKKGQEK-AN-.DGKEH-.ENQRGRD            |     |     |     |     |     | 338 |
| 7.6       | SLDLYES.E.AITG..KDE.DEQ-EE-DIMV.RRAGEEVQEP--D-D-SQDAM--GKFPQ--KQVVQEE..LL-F.GG.NGKKGQEK-AN-.DGKEH-.ENQRGRD            |     |     |     |     |     | 338 |

|           | 460       | 480                                                                          | 500   | 520 |  |
|-----------|-----------|------------------------------------------------------------------------------|-------|-----|--|
| Consensus | RXNL      | ---E-KE-QXKEIXDLESRXMENXNKEMVGXR-QRRRXEKIKPNLETAKKK-LXRIKLSNRYEE             | ----- | 411 |  |
| 1.1       | TEET      | -----GQSID.QA...GHLQKDG...TQ.KSAK...SL.....R..L.KDEEIECANKYELLKGLEDMD        | --    | 439 |  |
| 1.4       | TEET      | -----GQSID.QA...GHLQKDG...TQ.KSAK...SL.....R..L.KDEEIECANKYELLKGLEDMD        | --    | 439 |  |
| 1.6       | TEET      | -----GQSID.KQA...GHLQKDG...TQ.KSAK...SL.....R..L.KDEEIECANKYELLKGLEDMD       | --    | 439 |  |
| 1.7       | TEET      | -----GQSID.QA...GHLQKDG...TQ.KSAK...SL.....R..L.KDEEIECANKYELLKGLEDMD        | --    | 439 |  |
| 1.8       | TEET      | -----GQSID.QA...GHLQKDG...TQ.KSAK...SL.....R..L.KDEEIECANKYELLKGLEDMD        | --    | 439 |  |
| 1.9       | TEET      | -----GQSID.QA...GHLQKDG...TQ.KSAK...SL.....R..L.KDEEIECANKYELLKGLEDMD        | --    | 439 |  |
| 1.11      | TEET      | -----GQSID.QA...EHLQKDG...TQ.KSAK...SL.....V..R..L.KDEEIECANKYELLKGLEDMD     | --    | 439 |  |
| 2.2       | KEE       | ----R-.TG.AEGMAND.ETR...VD.NK.ERGFL...TF.V...DM...V.TKNRAKYVNRYEVLRLGLEEDEEK | 425   |     |  |
| 2.4       | KEE       | ----R-.TG.AEGMAND.ETM...VD.NK.ERGFL...TF.V...DM...V.TKNRAKYVNRYEVLRLGLEEDEEK | 425   |     |  |
| 2.5       | KEE       | ----R-.TG.AEGMAND.ETR...VD.NK.ERGFL...TF.V...DM...V.TKNRAKYVNRYEVLRLGLEEDEEK | 426   |     |  |
| 2.7       | KEE       | ----R-.TG.AEGMAND.ETM...VD.NK.ERGFL...TF.V...DM...V.TKNRAKYVNRYEVLRLGLEEDEEK | 425   |     |  |
| 2.8       | KEE       | ----R-.TG.AEGMAND.ETM...VD.NK.ERGFL...TF.V...DM...V.TKNRAKYVNRYEVLRLGLEEDEEK | 425   |     |  |
| 2.10      | KEE       | ----R-.TG.AEGMAND.ETR...VD.NK.ERGFL...TF.V...DM...V.TKNRAKYVNRYEVLRLGLEEDEEK | 426   |     |  |
| 2.11      | KEE       | ----R-.TG.AEGMAND.ETR...VD.NK.ERGFL...TF.V...DM...V.TKNRAKYVNRYEVLRLGLEEDEEK | 426   |     |  |
| 3.1       | .ETGKHEE  | -V.KDKL.KRQTRRSKVLKSLK.TARKKGLKKGQL.SHNRYDSLRLG-GEEED                        | ----- | 450 |  |
| 3.3       | .ETGKHEE  | -V.KDKL.KRQTRRSKVLKSLK.TARKKGLKKGQL.SHNRYDSLRLG-GEEED                        | ----- | 450 |  |
| 3.4       | .ETGKHEE  | -V.KDKL.KRQTRRSKVLKSLK.TARKKGLKKGQL.SHNRYDSLRLG-GEEED                        | ----- | 450 |  |
| S3.1      | .ETEKHEV  | -T.KDNF.KRQTRRSKALSKM.TTRKKVFKKGQL.SHNRY.FLRSL-GEEED                         | ----- | 482 |  |
| 4.1       | FERGNYGL  | --EKKEKGKKIKDLKSRKSGLNIEMVLQR.KI.R.E..ERM.MK.FE-KGDARNICLSDSDSE              | ----- | 485 |  |
| 4.3       | FERGNYGL  | --EKKEKGKKIKDLKSRKSGLNIEMVLQR.KI.R.E..ERM.RK.FE-KGDARNICLSDSDSE              | ----- | 485 |  |
| 4.4       | FERGNYGL  | --EKKEKGKKIKDLKSRKSGLNIEMVLQR.KI.R.E..ERM.RK.FE-KGDARNICLSDSDSE              | ----- | 485 |  |
| 4.5       | FERGNYGL  | --EKKEKGKKIKDLKSRKSGLNIEMVLQR.KI.R.E..ERM.RK.FE-KGDARNICLSDSDSE              | ----- | 485 |  |
| 4.6       | FERGNYGL  | --EKKEKGKKIKDLKSRKSGLNIEMVLQR.KI.R.E..ERM.RK.FE-KGDARNICLSDSDSE              | ----- | 485 |  |
| 4.9       | FERGNYGL  | --EKKEKGKKIKDLKSRKSGLNIEMVLQR.KI.R.E..ERM.RK.FE-KGDARNICLSDSDSE              | ----- | 485 |  |
| 4.10      | FERGNYGL  | --EKKEKGKKIKDLKSRKSGLNIEMVLQR.KI.R.E..ERM.RK.FE-KGDARNICLSDSDSE              | ----- | 485 |  |
| 4.11      | FERGNYGL  | --EKKEKGKKIKDLKSRKSGLNIEMVLQR.KI.R.E..ERM.RK.FE-KGDARNICLSDSDSE              | ----- | 485 |  |
| 4.12      | FERGNYGL  | --EKKEKGKKIKDLKSRKSGLNIEMVLQR.KI.R.E..ERM.RK.FE-KGDARNICLSDSDSE              | ----- | 485 |  |
| 4.14      | FERGNCGL  | --EKKEKGKKIKDLKSRKSGLNIEMVLQR.KI.R.E..ERM.RK.FE-KGDARNICLSDSDSE              | ----- | 485 |  |
| 4.15      | FERGNYGL  | --EKKEKGKKIKDLKSRKSGLNIEMVLQR.KI.R.E..ERM.RK.FE-KGDARNICLSDSDSE              | ----- | 485 |  |
| 5.3       | NSQMGDN   | .V.TG.RN.EKSN.IGRE.EIKMDREER.TI...TL.....ST.R.-T-TRMK.MNRYEVLKEMEGDDE        | ----- | 482 |  |
| 5.5       | NSQMGDN   | .V.TG.RN.EKSN.IGRE.EIKMDREER.TI...TL.....ST.R.-FT-TRMK.MNRYEVLKEMEGDDE       | ----- | 482 |  |
| 5.6       | NSQMGDN   | .V.TG.RN.EKSN.IGRE.EIKMDREER.TI...TL.....ST.R.-T-TRMK.MNRYEVLKEMEGDDE        | ----- | 482 |  |
| 6.1       | VNLRRRTLK | -VKPNLDNVRKKAKAN.F.VLRSLE.GEDE                                               | ----- | 436 |  |
| 6.2       | VNLRRRTLK | -VKPNLDNVRKKAKAN.F.VLRSLE.GEDE                                               | ----- | 436 |  |
| 6.3       | VNLRRRTLK | -VKPNLDNVRKKAKAN.F.VLRSLE.GEDE                                               | ----- | 436 |  |
| 6.5       | VNLRRRTLK | -VKPNLDNVRKKAKAN.F.VLRSLE.GEDE                                               | ----- | 436 |  |
| 6.6       | VNLRRRTLK | -VKPNLDNVRKKAKAN.F.VLRSLE.GEDE                                               | ----- | 436 |  |
| 6.7       | VNLRRRTLK | -VKPNLDNVRKKAKAN.F.VLRSLE.GEDE                                               | ----- | 436 |  |
| 7.1       | FMTR      | -I-L.TPLI.LE.EM.MSAGNIKMLKRK.K.TEEETTKK                                      | ----- | 379 |  |
| 7.3       | FMTR      | -I-L.TPLI.LE.EM.MSAGNIKMLKRK.K.TEEETTKK                                      | ----- | 379 |  |
| 7.4       | FMTR      | -I-L.TPLI.LE.EM.MSAGNIKMLKRK.K.TEEETTKK                                      | ----- | 379 |  |
| 7.5       | FMTR      | -I-L.TPLI.LE.EM.MSAGNIKMLKRK.K.TEEETTKK                                      | ----- | 379 |  |
| 7.6       | FMTR      | -I-L.TPLI.LE.EM..SAGNIKMLKRK.K.TEEETTKK                                      | ----- | 379 |  |

|           |              |            |           |           |             |             |          |          |           |         |          |         |          |         |         |            |          |           |          |         |         |           |        |           |        |        |        |        |        |        |        |        |        |        |        |        |        |        |        |        |        |        |        |        |        |        |     |
|-----------|--------------|------------|-----------|-----------|-------------|-------------|----------|----------|-----------|---------|----------|---------|----------|---------|---------|------------|----------|-----------|----------|---------|---------|-----------|--------|-----------|--------|--------|--------|--------|--------|--------|--------|--------|--------|--------|--------|--------|--------|--------|--------|--------|--------|--------|--------|--------|--------|--------|-----|
|           | 20           | 40         | 60        | 80        | 100         |             |          |          |           |         |          |         |          |         |         |            |          |           |          |         |         |           |        |           |        |        |        |        |        |        |        |        |        |        |        |        |        |        |        |        |        |        |        |        |        |        |     |
| Consensus | -----MMFRFLI | SFLFLLMVLN | CVSFNARGL | MDKXKFEK  | VKEKCKRKD   | VICLQETNWKE | EEVMNDFK | KKXWQGD  | ILYNNGDGK | SGRGVA  | ILIKKDV  | LNFKK   | I        | VYNDKEG | KCLX    | 106        |          |           |          |         |         |           |        |           |        |        |        |        |        |        |        |        |        |        |        |        |        |        |        |        |        |        |        |        |        |        |     |
| 1.1       | ---MFFMNV    | MSFMNV     | FIFF      | GI        | .....L      | IR          | .....M   | E        | .....L    | .....R  | C        | KEIR    | R        | S       | EM      | .....RL    | .....L   | ENSGVLC   | TI       | .....MI | 110     |           |        |           |        |        |        |        |        |        |        |        |        |        |        |        |        |        |        |        |        |        |        |        |        |        |     |
| 1.4       | MMFFMNV      | MSFMNV     | FIFF      | GI        | .....FL     | IR          | .....M   | E        | .....L    | .....R  | C        | IEIR    | R        | S       | EM      | .....RL    | .....L   | ENSGVLC   | TI       | .....MI | 111     |           |        |           |        |        |        |        |        |        |        |        |        |        |        |        |        |        |        |        |        |        |        |        |        |        |     |
| 1.5       | MMIFMNV      | MSFMNV     | FMFF      | GI        | .....L      | IR          | .....M   | E        | .....L    | .....R  | C        | IEIR    | R        | S       | EM      | .....RL    | .....L   | ENSGVLC   | TI       | .....MI | 111     |           |        |           |        |        |        |        |        |        |        |        |        |        |        |        |        |        |        |        |        |        |        |        |        |        |     |
| 1.6       | ---MFFMNV    | MSFMNV     | FIFF      | GI        | .....L      | IR          | .....M   | E        | .....L    | .....R  | C        | IEIR    | R        | S       | EM      | .....RL    | .....L   | ENSGVLC   | TI       | .....MI | 110     |           |        |           |        |        |        |        |        |        |        |        |        |        |        |        |        |        |        |        |        |        |        |        |        |        |     |
| 1.8       | MMFFMNV      | MSFMNV     | FIFF      | GI        | .....FL     | IR          | .....M   | E        | .....L    | .....R  | C        | IEIR    | R        | S       | EM      | .....RL    | .....L   | ENSGVLC   | TI       | .....MI | 111     |           |        |           |        |        |        |        |        |        |        |        |        |        |        |        |        |        |        |        |        |        |        |        |        |        |     |
| 1.9       | MMFFMNV      | MSFMNV     | FIFF      | GI        | .....FL     | IR          | .....M   | E        | .....L    | .....R  | C        | IEIR    | R        | S       | EM      | .....RL    | .....L   | ENSGVLC   | TI       | .....MI | 111     |           |        |           |        |        |        |        |        |        |        |        |        |        |        |        |        |        |        |        |        |        |        |        |        |        |     |
| 1.10      | MMIFMNV      | MSFMNV     | FMFF      | GI        | .....L      | IR          | .....M   | E        | .....L    | .....R  | C        | IEIR    | R        | S       | EM      | .....RL    | .....L   | ENSGVLC   | TI       | .....MI | 111     |           |        |           |        |        |        |        |        |        |        |        |        |        |        |        |        |        |        |        |        |        |        |        |        |        |     |
| 1.11      | MMFFMNV      | MSFMNV     | FIFF      | GI        | .....L      | IR          | .....M   | E        | .....L    | .....R  | C        | IEIR    | R        | S       | EM      | .....RL    | .....L   | ENSGVLC   | TI       | .....MI | 111     |           |        |           |        |        |        |        |        |        |        |        |        |        |        |        |        |        |        |        |        |        |        |        |        |        |     |
| 2.1       | ---MR        | C          | .....I    | .....G    | D           | .....I      | .....R   | .....N   | E         | .....G  | .....H   | A       | .....L   | .....I  | .....F  | .....R     | .....R   | .....R    | .....NY  | .....V  | 107     |           |        |           |        |        |        |        |        |        |        |        |        |        |        |        |        |        |        |        |        |        |        |        |        |        |     |
| 2.2       | ---MR        | C          | .....I    | .....G    | D           | .....I      | .....R   | .....H   | E         | .....G  | .....H   | A       | .....L   | .....I  | .....F  | .....R     | .....R   | .....R    | .....NY  | .....V  | 107     |           |        |           |        |        |        |        |        |        |        |        |        |        |        |        |        |        |        |        |        |        |        |        |        |        |     |
| 2.3       | ---MR        | C          | .....I    | .....G    | D           | .....I      | .....R   | .....H   | E         | .....G  | .....H   | A       | .....L   | .....F  | .....I  | .....F     | .....R   | .....R    | .....R   | .....NY | .....V  | 107       |        |           |        |        |        |        |        |        |        |        |        |        |        |        |        |        |        |        |        |        |        |        |        |        |     |
| 2.5       | ---MR        | C          | .....I    | .....G    | D           | .....I      | .....R   | .....H   | E         | .....G  | .....H   | A       | .....L   | .....I  | .....F  | .....R     | .....R   | .....R    | .....NY  | .....V  | 107     |           |        |           |        |        |        |        |        |        |        |        |        |        |        |        |        |        |        |        |        |        |        |        |        |        |     |
| 2.7       | ---MR        | C          | .....I    | .....G    | D           | .....I      | .....R   | .....H   | E         | .....G  | .....H   | A       | .....L   | .....I  | .....F  | .....R     | .....R   | .....R    | .....NY  | .....V  | 107     |           |        |           |        |        |        |        |        |        |        |        |        |        |        |        |        |        |        |        |        |        |        |        |        |        |     |
| 2.8       | ---MR        | C          | .....I    | .....G    | D           | .....I      | .....R   | .....H   | E         | .....G  | .....H   | A       | .....L   | .....I  | .....F  | .....R     | .....R   | .....R    | .....NY  | .....V  | 107     |           |        |           |        |        |        |        |        |        |        |        |        |        |        |        |        |        |        |        |        |        |        |        |        |        |     |
| 2.10      | ---MR        | C          | .....I    | .....G    | D           | .....I      | .....R   | .....N   | E         | .....G  | .....H   | A       | .....L   | .....I  | .....F  | .....R     | .....R   | .....R    | .....NY  | .....V  | 107     |           |        |           |        |        |        |        |        |        |        |        |        |        |        |        |        |        |        |        |        |        |        |        |        |        |     |
| 2.11      | ---MR        | C          | .....I    | .....G    | D           | .....I      | .....R   | .....N   | E         | .....G  | .....H   | A       | .....L   | .....I  | .....F  | .....R     | .....R   | .....R    | .....NY  | .....V  | 107     |           |        |           |        |        |        |        |        |        |        |        |        |        |        |        |        |        |        |        |        |        |        |        |        |        |     |
| S2.1      | ---MR        | C          | .....I    | .....G    | D           | .....I      | .....R   | .....N   | E         | .....G  | .....H   | A       | .....L   | .....I  | .....F  | .....R     | .....R   | .....R    | .....NY  | .....V  | 107     |           |        |           |        |        |        |        |        |        |        |        |        |        |        |        |        |        |        |        |        |        |        |        |        |        |     |
| S2.2      | ---MR        | C          | .....I    | .....G    | D           | .....I      | .....R   | .....N   | E         | .....G  | .....H   | A       | .....L   | .....I  | .....F  | .....R     | .....R   | .....R    | .....NY  | .....V  | 107     |           |        |           |        |        |        |        |        |        |        |        |        |        |        |        |        |        |        |        |        |        |        |        |        |        |     |
| 3.1       | -----MTVF    | .....FL    | .....LR   | KN        | .....EEI    | .....I      | .....N   | .....DIY | .....E    | .....D  | .....FY  | .....S  | .....T   | .....A  | .....NA | .....QMS   | .....VI  | .....K    | .....Q   | .....MI | 104     |           |        |           |        |        |        |        |        |        |        |        |        |        |        |        |        |        |        |        |        |        |        |        |        |        |     |
| 3.3       | -----MTVF    | .....FL    | .....LR   | KN        | .....EEI    | .....I      | .....N   | .....DIY | .....E    | .....D  | .....FY  | .....S  | .....T   | .....A  | .....NA | .....QMS   | .....VI  | .....K    | .....Q   | .....MI | 104     |           |        |           |        |        |        |        |        |        |        |        |        |        |        |        |        |        |        |        |        |        |        |        |        |        |     |
| 3.4       | -----MTVF    | .....FL    | .....LR   | NN        | .....EEI    | .....I      | .....N   | .....DIY | .....E    | .....D  | .....FY  | .....S  | .....T   | .....A  | .....NA | .....QMS   | .....VI  | .....K    | .....Q   | .....MI | 104     |           |        |           |        |        |        |        |        |        |        |        |        |        |        |        |        |        |        |        |        |        |        |        |        |        |     |
| 4.5       | -----MSNVCV  | .....L     | .....V    | .....SKCE | .....RLTCLT | .....KC     | .....IL  | .....K   | .....EN   | .....IK | .....EMR | .....L  | .....N   | .....E  | .....FS | .....NIEKN | .....RGI | .....FEKV | .....ELD | .....K  | .....TN | .....RIII | 93     |           |        |        |        |        |        |        |        |        |        |        |        |        |        |        |        |        |        |        |        |        |        |        |     |
| 4.10      | -----MSNVCV  | .....L     | .....V    | .....SKCE | .....RLTCLT | .....KC     | .....IL  | .....K   | .....EN   | .....IK | .....EMR | .....L  | .....N   | .....E  | .....FS | .....NIEKN | .....RGI | .....FEKV | .....ELD | .....K  | .....TN | .....RIII | 93     |           |        |        |        |        |        |        |        |        |        |        |        |        |        |        |        |        |        |        |        |        |        |        |     |
| 4.11      | -----MSNVCV  | .....L     | .....V    | .....SKCE | .....RLTCLT | .....KC     | .....IL  | .....K   | .....EN   | .....IK | .....EMR | .....L  | .....N   | .....E  | .....FS | .....NIEKN | .....RGI | .....FEKV | .....ELD | .....K  | .....TN | .....RIII | 93     |           |        |        |        |        |        |        |        |        |        |        |        |        |        |        |        |        |        |        |        |        |        |        |     |
| 4.14      | -----MSNVCV  | .....L     | .....V    | .....SKCE | .....RLTCLT | .....KC     | .....ML  | .....K   | .....EN   | .....IK | .....EMR | .....L  | .....N   | .....E  | .....FS | .....NIEKN | .....RGI | .....FEKV | .....ELD | .....K  | .....TN | .....RIII | 93     |           |        |        |        |        |        |        |        |        |        |        |        |        |        |        |        |        |        |        |        |        |        |        |     |
| 5.3       | -----I       | .....L     | .....K    | .....M    | .....E      | .....G      | .....IR  | .....N   | .....M    | .....V  | .....DY  | .....E  | .....K   | .....E  | .....F  | .....L     | .....F   | .....I    | .....L   | .....K  | .....NN | .....V    | 106    |           |        |        |        |        |        |        |        |        |        |        |        |        |        |        |        |        |        |        |        |        |        |        |     |
| 5.4       | -----I       | .....LS    | .....K    | .....M    | .....E      | .....G      | .....IR  | .....F   | .....N    | .....M  | .....V   | .....DY | .....E   | .....K  | .....E  | .....F     | .....L   | .....F    | .....I   | .....L  | .....K  | .....NN   | .....V | 106       |        |        |        |        |        |        |        |        |        |        |        |        |        |        |        |        |        |        |        |        |        |        |     |
| 5.6       | -----I       | .....L     | .....K    | .....M    | .....E      | .....G      | .....IR  | .....N   | .....M    | .....V  | .....DY  | .....E  | .....K   | .....E  | .....F  | .....L     | .....F   | .....I    | .....L   | .....K  | .....NN | .....V    | 106    |           |        |        |        |        |        |        |        |        |        |        |        |        |        |        |        |        |        |        |        |        |        |        |     |
| 5.7       | -----I       | .....LS    | .....K    | .....M    | .....E      | .....G      | .....IR  | .....N   | .....M    | .....V  | .....DY  | .....E  | .....K   | .....E  | .....F  | .....L     | .....F   | .....I    | .....L   | .....K  | .....NN | .....V    | 106    |           |        |        |        |        |        |        |        |        |        |        |        |        |        |        |        |        |        |        |        |        |        |        |     |
| 5.8       | -----I       | .....L     | .....K    | .....M    | .....E      | .....G      | .....IR  | .....N   | .....M    | .....V  | .....DY  | .....E  | .....K   | .....E  | .....F  | .....L     | .....F   | .....I    | .....L   | .....K  | .....NN | .....V    | 106    |           |        |        |        |        |        |        |        |        |        |        |        |        |        |        |        |        |        |        |        |        |        |        |     |
| 6.1       | ---MYFKYL    | FLFLS      | .....F    | .....T    | .....L      | .....NVG    | .....D   | .....L   | .....K    | .....Q  | .....N   | .....L  | .....NDG | .....E  | .....RR | .....R     | .....Q   | .....F    | .....RM  | .....V  | .....E  | .....IK   | .....D | .....VEEL | .....A | 107    |        |        |        |        |        |        |        |        |        |        |        |        |        |        |        |        |        |        |        |        |     |
| 6.2       | ---MYFKYL    | FLFLS      | .....F    | .....T    | .....L      | .....NVG    | .....D   | .....L   | .....K    | .....Q  | .....N   | .....L  | .....NDG | .....E  | .....RR | .....R     | .....Q   | .....F    | .....RM  | .....V  | .....E  | .....IK   | .....D | .....VEEL | .....A | 107    |        |        |        |        |        |        |        |        |        |        |        |        |        |        |        |        |        |        |        |        |     |
| 6.4       | ---MYFKYL    | FLFLS      | .....F    | .....T    | .....L      | .....NVG    | .....D   | .....L   | .....K    | .....Q  | .....N   | .....L  | .....NDG | .....E  | .....RR | .....R     | .....Q   | .....F    | .....RM  | .....V  | .....E  | .....IK   | .....D | .....VEEL | .....A | 107    |        |        |        |        |        |        |        |        |        |        |        |        |        |        |        |        |        |        |        |        |     |
| 6.5       | ---MYFKYL    | FLFLS      | .....F    | .....T    | .....L      | .....NVG    | .....D   | .....L   | .....K    | .....Q  | .....N   | .....L  | .....NDG | .....E  | .....RR | .....R     | .....Q   | .....F    | .....RM  | .....V  | .....E  | .....IK   | .....D | .....VEEL | .....A | 107    |        |        |        |        |        |        |        |        |        |        |        |        |        |        |        |        |        |        |        |        |     |
| 6.6       | ---MYFKYL    | FLFLS      | .....F    | .....T    | .....L      | .....NVG    | .....D   | .....L   | .....K    | .....Q  | .....N   | .....L  | .....NDG | .....E  | .....RR | .....R     | .....Q   | .....F    | .....RM  | .....V  | .....E  | .....IK   | .....D | .....VEEL | .....A | 107    |        |        |        |        |        |        |        |        |        |        |        |        |        |        |        |        |        |        |        |        |     |
| 6.7       | ---MYFKYL    | FLFLS      | .....F    | .....T    | .....L      | .....NVG    | .....D   | .....L   | .....K    | .....Q  | .....N   | .....L  | .....NDG | .....E  | .....RR | .....R     | .....Q   | .....F    | .....RM  | .....V  | .....E  | .....IK   | .....D | .....VEEL | .....A | 107    |        |        |        |        |        |        |        |        |        |        |        |        |        |        |        |        |        |        |        |        |     |
| 7.5       | -----WVLL    | FFILY      | AMCDL     | .....K    | .....I      | .....A      | .....C   | .....N   | .....REME | .....R  | .....I   | .....R  | .....F   | .....T  | .....H  | .....S     | .....N   | .....D    | .....K   | .....S  | .....I  | .....V    | .....G | .....E    | .....Y | .....H | .....S | .....Q | .....R | .....A | .....C | .....L | .....G | .....G | .....I | .....H | .....N | .....V | .....Q | .....I | .....H | .....G | .....N | .....R | .....L | .....G | 104 |

|           | 120                                                                                                                                                                                                                                                 | 140 | 160 | 180 | 200 | 220 |     |
|-----------|-----------------------------------------------------------------------------------------------------------------------------------------------------------------------------------------------------------------------------------------------------|-----|-----|-----|-----|-----|-----|
| Consensus | I E V N Y E G K E M I I A N I H A P T E E K D K K E F N V L N K V L K X X K E I I M M G D F N T V F X K Q D M A D G M V F K S D T G R K E L K E L M K E N N L I D I W R E R N E E K R E F S R R Q I V G N F I C Q T R I D F                         |     |     |     |     |     | 217 |
| 1.1       | C . M E . . K . K V . M V . V . . . . . N K . . . Y . . . R D Y . . H E R V . I . . . . . S . L E . E . . . . T . K . . . . . I . E . M . . . V . . . . . Q T K . Y . . . . . C . . . . .                                                           |     |     |     |     |     | 221 |
| 1.4       | C . M E . . K . K V . M V . V . . . . . N K . . . Y . . . R D Y . . H E R V . I . . . . . S . L E . E . . . . T . K . . . . . I . E . M . . . V . . . . . Q T K . Y . . . . . C . . . . .                                                           |     |     |     |     |     | 222 |
| 1.5       | C . M E . . K . K V . M V . V . . . . . N K . . . Y . . . R D Y . . H E R V . I . . . . . S . L E . E . . . . T . K . . . . . Q . I . . . . . I . E . M . . . V . . . . . Q T K . Y . . . . . C . . . . .                                           |     |     |     |     |     | 222 |
| 1.6       | C . M E . . K . K V . M V . V . . . . . N K . . . Y . . . R D Y . . H E R V . I . . . . . S . L E . E . . . . T . K . . . . . I . E . M . . . V . . . . . Q T K . Y . . . . . C . . . . .                                                           |     |     |     |     |     | 221 |
| 1.8       | C . M E . . K . K V . M V . V . . . . . N K . . . Y . . . R D Y . . H E R V . I . . . . . S . L E . E . . . . T . K . . . . . I . E . M . . . V . . . . . Q T K . Y . . . . . C . . . . .                                                           |     |     |     |     |     | 222 |
| 1.9       | C . M E . . K . K V . M V . V . . . . . N K . . . Y . . . R D Y . . H E R V . I . . . . . S . L E . E . . . . T . K . . . . . I . E . M . . . V . . . . . Q T K . Y . . . . . C . . . . .                                                           |     |     |     |     |     | 222 |
| 1.10      | C . M E . . K . K V . M V . V . . . . . N K . . . Y . . . R D Y . . H E R V . I . . . . . S . L E . E . . . . T . K . . . . . Q . I . . . . . I . E . M . . . V . . . . . Q T K . Y . . . . . C . . . . .                                           |     |     |     |     |     | 222 |
| 1.11      | C . M E . . K . K V . M V . V . . . . . N K . . . Y . . . R D Y . . H E R V . I . . . . . S . L E . E . . . . T . K . . . . . I . E . M . . . V . . . . . Q T K . Y . . . . . C . . . . .                                                           |     |     |     |     |     | 222 |
| 2.1       | . . . . . H . L . . . . . D . . . . . Y . E . . . . . G F . . . . . R . . . . . I . . . . . Q . N . . . . . I . . . . . S . . . . . R . . . . .                                                                                                     |     |     |     |     |     | 218 |
| 2.2       | . . . . . H . L . . . . . D . . . . . Y . E . . . . . G F . . . . . R . . . . . I . . . . . N . . . . . I . . . . . S . . . . . R . . . . .                                                                                                         |     |     |     |     |     | 218 |
| 2.3       | . . . . . H . L . . . . . D . . . . . Y . E . . . . . G F . . . . . R . . . . . I . . . . . N . . . . . I . . . . . S . . . . . R . . . . .                                                                                                         |     |     |     |     |     | 218 |
| 2.5       | . . . . . H . L . . . . . D . . . . . Y . E . . . . . G F . . . . . R . . . . . I . . . . . E . . . . . N . . . . . I . . . . . S . V . . . . . R V . . . . .                                                                                       |     |     |     |     |     | 218 |
| 2.7       | . . . . . H . L . . . . . D . . . . . Y . E . . . . . G F . . . . . R . . . . . I . . . . . N . . . . . I . . . . . S . . . . . R . . . . .                                                                                                         |     |     |     |     |     | 218 |
| 2.8       | . . . . . H . L . . . . . D . . . . . Y . E . . . . . G F . . . . . R . . . . . I . . . . . N . . . . . I . . . . . S . . . . . R . . . . .                                                                                                         |     |     |     |     |     | 218 |
| 2.10      | . . . . . H . L . . . . . D . . . . . Y . E . . . . . G F . . . . . R . . . . . I . . . . . Q . N . . . . . I . . . . . S . V . . . . . R . . . . .                                                                                                 |     |     |     |     |     | 218 |
| 2.11      | . . . . . H . L . . . . . D . . . . . Y . E . . . . . G F . . . . . R . . . . . I . . . . . Q . N . . . . . I . . . . . S . . . . . R . . . . .                                                                                                     |     |     |     |     |     | 218 |
| S2.1      | . . . . . H . L . . . . . D . . . . . Y . E . . . . . G F . . . . . R . . . . . I . . . . . Q . N . . . . . I . . . . . S . . . . . R . . . . .                                                                                                     |     |     |     |     |     | 218 |
| S2.2      | . . . . . H . L . . . . . D . . . . . Y . E . . . . . G F . . . . . R . . . . . I . . . . . Q . N . . . . . I . . . . . S . . . . . R . . . . .                                                                                                     |     |     |     |     |     | 218 |
| 3.1       | L . I . K . . . . . D I . L V . V . . . . . N . S E . S . . . . . I R R F . N Y . Q . V C . . . . . S R . I T E . . . . . S . I E . K G M . . . . . G K . K . . . . . V N . S . . . . . Y                                                           |     |     |     |     |     | 215 |
| 3.3       | L . I . K . . . . . D I . L V . V . . . . . N . S E . S . . . . . I R R F . N Y . Q . V C . . . . . S R . I T E . . . . . S . I E . K G M . . . . . G K . K . . . . . P . . . . . V N . S . . . . . Y                                               |     |     |     |     |     | 215 |
| 3.4       | L . I . K . . . . . D I . L V . V . . . . . N . S E . S . . . . . I R R F . N Y . Q . V C . . . . . S R . I T E . . . . . S . I E . K G M . . . . . G K . K . . . . . V N . S . . . . . Y                                                           |     |     |     |     |     | 215 |
| 4.5       | V K . L . G . . . . . S F R V C . . . . . N . . . . . Y N . Y K E I D . L I E . N E N . F I L . . . . . I A M Q R I . I D . S . N . R T . R . . . . . N . Q N . R K C D . V . V . . . . . G M . . . . . Y . . . . . E . A N R I L K . S . . . . . L |     |     |     |     |     | 204 |
| 4.10      | V K . L . G . . . . . S F R V C . . . . . N . . . . . Y N . Y K E I D . L I E . N E N . F I L . . . . . I A M Q R I . I D . S . N . R T . R . . . . . N . Q N . R K C D . V . V . . . . . G M . . . . . Y . . . . . E . A N R I L K . S . . . . . L |     |     |     |     |     | 204 |
| 4.11      | V K . L . G . . . . . S F R V C . . . . . N . . . . . Y N . Y K E I D . L I E . N E N . F I L . . . . . I A M Q R I . I D . S . N . R T . R . . . . . N . Q N . R K C D . V . V . . . . . G M . . . . . Y . . . . . E . A N R I L K . S . . . . . L |     |     |     |     |     | 204 |
| 4.14      | V K . L . G . . . . . S F R V C . . . . . N . . . . . Y N . Y K E I D . L I E . N E N . F I L . . . . . I A M Q R I . I D . S . N . R T . R . . . . . N . Q N . R K C D . V . V . . . . . G M . . . . . Y . . . . . E . A N R I L K . S . . . . . L |     |     |     |     |     | 204 |
| 5.3       | . . . . . Q . . . . . . . . . . . K I . . . . . I E R Y . K . . . . . V . . . . . N . . . . . . . . . . . A . . . . . I . . . . . . . . . . . N . K . . . . . D . . . . .                                                                           |     |     |     |     |     | 217 |
| 5.4       | . . . . . Q . . . . . . . . . . . K I . . . . . I E R H . K . . . . . V . . . . . N . . . . . . . . . . . A . . . . . I . . . . . . . . . . . N . K . . . . . D . . . . .                                                                           |     |     |     |     |     | 217 |
| 5.6       | . . . . . Q . . . . . . . . . . . K I . . . . . I E R Y . K . . . . . V . . . . . N . . . . . . . . . . . A . . . . . I . . . . . . . . . . . K . K . . . . . D . . . . .                                                                           |     |     |     |     |     | 217 |
| 5.7       | . . . . . Q . . . . . . . . . . . K I . . . . . I E R H . K . . . . . V . . . . . N . . . . . . . . . . . A . . . . . I . . . . . . . . . . . N . K . . . . . D . . . . .                                                                           |     |     |     |     |     | 217 |
| 5.8       | . . . . . Q . . . . . . . . . . . K I . . . . . I E R Y . K . . . . . V . . . . . N . . . . . . . . . . . A . . . . . I . . . . . . . . . . . N . K . . . . . D . . . . .                                                                           |     |     |     |     |     | 217 |
| 6.1       | R M R - . . N N . T L C . . . . . V A . . . E . D . . . . . R I . D L M I L W G . T . L I . . . . . N R I . L . . . . . R N . . . . . Q K . . A . H K V V . . . . . V . . . . . G . . . . . Y . . . . . L . D G N L K . S . . . . .                 |     |     |     |     |     | 216 |
| 6.2       | R M R - . . N N . T L C . . . . . V A . . . E . D . . . . . R I . D L M I L W G . T . L I . . . . . N R I . L . . . . . R N . . . . . Q K . . A . H K V V . . . . . V . . . . . G . . . . . Y . . . . . L . D G N L K . S . . . . . A               |     |     |     |     |     | 216 |
| 6.4       | R M R - . . N N . T L C . . . . . V A . . . E . D . . . . . R I . D L M I L W G . T . L I . . . . . N R I . L . . . . . R N . . . . . Q K . . A . H K V V . . . . . V . . . . . G . . . . . Y . . . . . L . D G N L K . S . . . . .                 |     |     |     |     |     | 216 |
| 6.5       | R M R - . . N N . T L C . . . . . V A . . . E . D . . . . . R I . D L M I L W G . T . L I . . . . . N R I . L . . . . . R N . . . . . Q K . . A . H K V V . . . . . V . . . . . G . . . . . Y . . . . . L . D G N L K . S . . . . .                 |     |     |     |     |     | 216 |
| 6.6       | R M R - . . N N . T L C . . . . . V A . . . E . D . . . . . R I . D L M I L W G . T . L I . . . . . N R I . L . . . . . R N . . . . . Q K . . A . H K V G . . . . . V . . . . . G . . . . . Y . . . . . L . D G N L K . S . . . . .                 |     |     |     |     |     | 216 |
| 6.7       | R M R - . . N N . T L C . . . . . V A . . . E . D . . . . . R I . D L M I L W G . T . L I . . . . . N R I . L . . . . . R N . . . . . Q K . . A . H K V G . . . . . V . . . . . G . . . . . Y . . . . . L . D G N L K . S . . . . .                 |     |     |     |     |     | 216 |
| 7.5       | . D F M . Y N E S F R L L . L Y . . N I . T E R . . V . K T M K P L C T G - - N C . V V . . . . . V W C T R L . V S K S I N . . . . . A S . R Y . N . . . . . Q S E . M V . A . . . . . E . P F . . . . . V G V L K . S . . . . . L                 |     |     |     |     |     | 213 |

|           | 240                                                                                                                                                                                                                           | 260 | 280 | 300 | 320 |     |
|-----------|-------------------------------------------------------------------------------------------------------------------------------------------------------------------------------------------------------------------------------|-----|-----|-----|-----|-----|
| Consensus | I L C T R N I E N F I E N I Q Y E E T S L S D H K L L H F K V N X E N I Q K G P G X W I L N T T I L K N E D Y V Q K V K E I I E K E K E N E M Y D E D K R I W W E N T K Y Q I K K Y T I K Y C A V L Q R C K K Y K E K E V K K |     |     |     |     | 328 |
| 1.1       | V G N K K P F M L D W S V K R V V A V L S Q G I N M V L V F R Q N L E                                                                                                                                                         |     |     |     |     | 332 |
| 1.4       | V G N K K P F M L D W S V K R V V A V L S Q G I N M V L V F R Q N L E                                                                                                                                                         |     |     |     |     | 333 |
| 1.5       | V G N K K P F M L D W S V K R V V A V L S K Q G I N M V L V F R Q N L E                                                                                                                                                       |     |     |     |     | 333 |
| 1.6       | V G N K K P F M L D W S V K R V V A V L S Q G I N M V L V F R Q N L E                                                                                                                                                         |     |     |     |     | 332 |
| 1.8       | V G N K K P F M L D W S V K R V V A V L S Q G I N M V L V F R Q N L E                                                                                                                                                         |     |     |     |     | 333 |
| 1.9       | V G N K K P F M L D W S V K R V V A V L S Q G I N M V L V F R Q N L E                                                                                                                                                         |     |     |     |     | 333 |
| 1.10      | V G N K K P F M L D W S V K R V V A V L S K Q G I N M V L V F R Q N L E                                                                                                                                                       |     |     |     |     | 333 |
| 1.11      | V G N K K K P F M L D W S V K R V V A V L S Q G I N M V L V F R Q N L E                                                                                                                                                       |     |     |     |     | 333 |
| 2.1       | N F I T Q N R R T R                                                                                                                                                                                                           |     |     |     |     | 329 |
| 2.2       | N F I T Q N R R T R                                                                                                                                                                                                           |     |     |     |     | 329 |
| 2.3       | N F I T Q N R R T R                                                                                                                                                                                                           |     |     |     |     | 329 |
| 2.5       | N F I T Q N R R T R                                                                                                                                                                                                           |     |     |     |     | 329 |
| 2.7       | N F I T Q N R R T R                                                                                                                                                                                                           |     |     |     |     | 329 |
| 2.8       | N F I T Q N R R T R                                                                                                                                                                                                           |     |     |     |     | 329 |
| 2.10      | N F I T Q N R R T R                                                                                                                                                                                                           |     |     |     |     | 329 |
| 2.11      | N F I T Q N R R T R                                                                                                                                                                                                           |     |     |     |     | 329 |
| S2.1      | N F I T Q N R R T R                                                                                                                                                                                                           |     |     |     |     | 329 |
| S2.2      | N F I T Q N R R T R                                                                                                                                                                                                           |     |     |     |     | 329 |
| 3.1       | V I Y K R D V F V F N F T E R V T S E K G Q I N L V F L S L T F R I I K N R H T I E                                                                                                                                           |     |     |     |     | 326 |
| 3.3       | V I Y K S D V F V F N F T E R V T S E K G Q I N L V F L S L T F R I I K N R H T I E                                                                                                                                           |     |     |     |     | 326 |
| 3.4       | V I Y K R D V F V F N F T D E R V T S D N K I T V Q I N L V F L S L T F R I I K N R H T I E                                                                                                                                   |     |     |     |     | 326 |
| 4.5       | F K K K E V Q Y V N T L K T Y E D F W I T M F N E E V E L I S K M D I E N I N S V N D F E T E T G L D L N K E S N I S E K I K A F N K I R                                                                                     |     |     |     |     | 315 |
| 4.10      | F K K E V Q Y V N T L K T Y E D F W I T M F N E E V E L I S K M N I E N I N S V N D F E T E T G L D L N R E S N I S E K I K A F N K I R                                                                                       |     |     |     |     | 315 |
| 4.11      | F K K K E V Q Y V N T L K T Y E D F W I T M F N E E V E L I S K M N I E N I N S V N D F E T E T G L D L N R E S N I S E K I K A F N K I R                                                                                     |     |     |     |     | 315 |
| 4.14      | F K K K E V Q Y V N T L K T Y E D F W I T M F N E E V E L I S K M D I E N I N S V N D F E T E T G L D L N R E S N I S E K I K A F N K I R                                                                                     |     |     |     |     | 315 |
| 5.3       | N F V D T R I R T N                                                                                                                                                                                                           |     |     |     |     | 328 |
| 5.4       | N F V D T R I R T N                                                                                                                                                                                                           |     |     |     |     | 328 |
| 5.6       | N F V D T R I R T N                                                                                                                                                                                                           |     |     |     |     | 328 |
| 5.7       | N F V D T R I R T N                                                                                                                                                                                                           |     |     |     |     | 328 |
| 5.8       | N F V D T R I R T N                                                                                                                                                                                                           |     |     |     |     | 328 |
| 6.1       | K E K L G D Q S V Y F K T F L M I D F N E T K R K I E G P R K A I V D L N T I Q H D E M S K S I K A A H V R                                                                                                                   |     |     |     |     | 327 |
| 6.2       | K E K L G D Q S V Y F K T F L M I D F N E T K R K I E G P R K A I V D L N T I Q H D E M S K S I K A A H V R                                                                                                                   |     |     |     |     | 327 |
| 6.4       | K E K L G D Q S V Y F K T F L M I D F N E T K R K I E G P R K A I V D L N T I Q H D E M S K S I K A A H V R                                                                                                                   |     |     |     |     | 327 |
| 6.5       | K E K L G D Q S V Y F K T F L M I D F N E T K R K I E G P R K A I V D L N T I Q H D E M S K S I K A A H V R                                                                                                                   |     |     |     |     | 327 |
| 6.6       | K E K L G D Q S V Y F K T F L M I D F N E T K R K I E G P R K A I V D L N T I Q H D E M S K S I K A A H V R                                                                                                                   |     |     |     |     | 327 |
| 6.7       | K E K L G D Q S V Y F K T F L M I D F N E T K R K I E G P R K A I V D L N T I Q H D E M S K S I K A A H V R                                                                                                                   |     |     |     |     | 327 |
| 7.5       | C V K D L Q Y V K V S K F I E I G A A M I V M S L N L E S R G M C A S L E A R E S I E R C R Y M P L F E N N V C E D L E K I R S R S K Q R N F K R M E M E S M R N                                                             |     |     |     |     | 324 |



|           | 340                                                                                                    | 360                                                                                                  | 380                                               | 400                | 420                          | 440                     |                                                  |                             |     |
|-----------|--------------------------------------------------------------------------------------------------------|------------------------------------------------------------------------------------------------------|---------------------------------------------------|--------------------|------------------------------|-------------------------|--------------------------------------------------|-----------------------------|-----|
| Consensus | SLEKELNKEN                                                                                             | -- KDI EK I KELEQKLRD                                                                                | LEEDKYKGAMLR                                      | SRAKYTV            | EGEKCTKFFFD                  | LEKQRGKAEI              | I KEI KGRNGKIVKGNXEI                             | LEEI XHFYEDLFKAKGIDEEKERKLL | 437 |
| 1.1       | K..N..KN..                                                                                             | -G.N.Q....                                                                                           | QGR.NEM..                                         | E.FE..R..K..F..... | R...S.M.R..RSK..N..EQHE..... | RSY..K..CTE..K..KEKGE.. |                                                  |                             | 442 |
| 1.4       | K..N..KN..                                                                                             | -G.N.Q....                                                                                           | QGR.NEM..                                         | E.FE..R..K..F..... | R...S.M.R..RSK..N..EQHE..... | RSY..K..CTE..K..KEKGE.. |                                                  |                             | 443 |
| 1.5       | K..T..KN..                                                                                             | -G.N.Q....                                                                                           | QGR.NEM..                                         | E.FE..R..K..F..... | R...S.M.R..RSK..N..EQHE..... | RSY..K..CTE..K..KEKGE.. |                                                  |                             | 443 |
| 1.6       | K..N..KN..                                                                                             | -G.N.Q....                                                                                           | QGR.NEM..                                         | E.FE..R..K..F..... | R...S.M.R..RSK..N..EQHE..... | RSY..K..CTE..K..KEKGE.. |                                                  |                             | 442 |
| 1.8       | K..N..KN..                                                                                             | -G.N.Q....                                                                                           | QGR.NEM..                                         | E.FE..R..K..F..... | R...S.M.R..RSK..N..EQHE..... | RSY..K..CTE..K..KEKGE.. |                                                  |                             | 443 |
| 1.9       | K..N..KN..                                                                                             | -G.N.Q....                                                                                           | QGR.NEM..                                         | E.FE..R..K..F..... | R...S.M.R..RSK..N..EQHE..... | RSY..K..CTE..K..KEKGE.. |                                                  |                             | 443 |
| 1.10      | K..T..KN..                                                                                             | -G.N.Q....                                                                                           | QGR.NEM..                                         | E.FE..R..K..F..... | R...S.M.R..RSK..N..EQHE..... | RSY..K..CTE..K..KEKGE.. |                                                  |                             | 443 |
| 1.11      | K..N..KN..                                                                                             | NG.N.Q....                                                                                           | QGR.NEM..                                         | E.FE..R..K..F..... | R...S.M.R..RSK..N..EQHE..... | RSY..K..CTE..K..KEKGE.. |                                                  |                             | 444 |
| 2.1       |                                                                                                        |                                                                                                      |                                                   |                    |                              |                         | G.L.....A...I.....K.....I.....                   |                             | 438 |
| 2.2       |                                                                                                        |                                                                                                      |                                                   |                    |                              |                         | S.....G.L.....A...I.....KY.....I.....            |                             | 438 |
| 2.3       |                                                                                                        |                                                                                                      |                                                   |                    |                              |                         | S.....G.L.....A...I.....K.....I.....             |                             | 438 |
| 2.5       |                                                                                                        |                                                                                                      |                                                   |                    |                              |                         | S.....T.....G.L.....A...I.....K.....E.....I..... |                             | 438 |
| 2.7       |                                                                                                        |                                                                                                      |                                                   |                    |                              |                         | S.....G.L.....MA...I.....K.....NQ.....I.....     |                             | 438 |
| 2.8       |                                                                                                        |                                                                                                      |                                                   |                    |                              |                         | S.....G.L.....MA...I.....K.....NQ.....I.....     |                             | 438 |
| 2.10      |                                                                                                        |                                                                                                      |                                                   |                    |                              |                         | S.....G.L.....A...I.....K.....I.....             |                             | 438 |
| 2.11      |                                                                                                        |                                                                                                      |                                                   |                    |                              |                         | S.....G.L.....A...I.....K.....I.....             |                             | 438 |
| S2.1      |                                                                                                        |                                                                                                      |                                                   |                    |                              |                         | S.....G.L.....A...I.....K.....I.....             |                             | 438 |
| S2.2      |                                                                                                        |                                                                                                      |                                                   |                    |                              |                         | S.....G.L.....A...I.....K.....I.....             |                             | 438 |
| 3.1       | N..I..D.NE-                                                                                            | -Q....M.G..KEI..K..E..R..K..V.....                                                                   | R.KA...T..I.Q.AK.ESIE..E..K..KKY..E..TQ.V..VQMS.. |                    |                              |                         |                                                  |                             | 435 |
| 3.3       | N..I..E.NE-                                                                                            | -Q....M.G..KEI..K..E..R..K..V.....                                                                   | R.KA...T..I.Q.AK.ESIE..E..K..KKY..E..TQ.V..VQMS.. |                    |                              |                         |                                                  |                             | 435 |
| 3.4       | N..I..G.NE-                                                                                            | -Q....M.G..KEI..K..E..R..K..VA.....                                                                  | R.KA...T..I.Q.AK.ESIE..E..K..KKY..E..TQ.V..VQMA.. |                    |                              |                         |                                                  |                             | 435 |
| 4.5       | EWNE.MS.V.-                                                                                            | GINVD..I..QE..KKI..E.C..VII..DI...RS..Y.YE..T.QR.A..C..TQD..T.EDKEG..N.TRR..KE..TEN.VNLND.HF..       |                                                   |                    |                              |                         |                                                  |                             | 425 |
| 4.10      | EWNE.MS.V.-                                                                                            | GINVD..I..QE..KKI..E.C..VII..DI...RS..Y.YE..T.QR.AV..C..TQD..T.EDKEG..N.TRR..KE..TEN.VNLND.HF..      |                                                   |                    |                              |                         |                                                  |                             | 425 |
| 4.11      | EWNE.MS.V.-                                                                                            | GINVD..I..QE..KKI..E.C..VII..DI...RS..Y.YE..T.QR.A..C..TQD..T.EDKEG..N.TRR..KE..TEN.VNLND.HF..       |                                                   |                    |                              |                         |                                                  |                             | 425 |
| 4.14      | EWNE.MS.V.-                                                                                            | GINVD..I..QE..KKI..E.C..VII..DI...RS..Y.YE..T.QR.A..C..TQD..T.EDKEG..N.TRR..KE..TEN.VNIND.HF..       |                                                   |                    |                              |                         |                                                  |                             | 425 |
| 5.3       |                                                                                                        |                                                                                                      |                                                   |                    |                              |                         | S.....G.L.....A...I.....K.....E.....I.....       |                             | 437 |
| 5.4       |                                                                                                        |                                                                                                      |                                                   |                    |                              |                         | S.....G.L.....A...I.....K.....E.....I.....       |                             | 437 |
| 5.6       |                                                                                                        |                                                                                                      |                                                   |                    |                              |                         | S.....G.L.....A...I.....K.....E.....I.....       |                             | 437 |
| 5.7       |                                                                                                        |                                                                                                      |                                                   |                    |                              |                         | S.....G.L.....A...I.....K.....E.....I.....       |                             | 437 |
| 5.8       |                                                                                                        |                                                                                                      |                                                   |                    |                              |                         | S.....G.L.....A...I.....K.....E.....I.....       |                             | 437 |
| 6.1       | E.NDS..Q.K.-V..R.LF..EE..NI..R.CR..I.....CI.D.....N..SK.NG..R.L.KE..EKI.ETQD..K.VRD..S...KGE.N.KE.KN.. |                                                                                                      |                                                   |                    |                              |                         |                                                  |                             | 436 |
| 6.2       | E.NDS..Q.K.-V..R.LF..EE..NI..R.CR..I.....I.D.....N..SK.NG..R.L.KE..EKI.ETQD..K.VRD..S...KGE.N.KE.KN..  |                                                                                                      |                                                   |                    |                              |                         |                                                  |                             | 436 |
| 6.4       | E.NDS..Q.K.-V..R.LF..EE..NI..R.CR..I.....I.D.....N..SK.NG..R.L.KE..EKI.ETQD..K.VRD..S...KGE.N.KE.KN..  |                                                                                                      |                                                   |                    |                              |                         |                                                  |                             | 436 |
| 6.5       | E.NDS..Q.K.-V..R.LF..EE..NI..R.CR..I.....I.D.....N..SK.NG..R.L.KE..EKI.ETQD..K.VRD..S...KGE.N.KE.KN..  |                                                                                                      |                                                   |                    |                              |                         |                                                  |                             | 436 |
| 6.6       | E.NDS..Q.K.-V..R.LF..EE..NI..R.CR..I.....I.D.....N..SK.NG..R.L.KE..EKI.ETQD..K.VRD..S...KGE.N.KE.KN..  |                                                                                                      |                                                   |                    |                              |                         |                                                  |                             | 436 |
| 6.7       | E.NDS..Q.K.-V..R.LF..EE..NI..R.CR..I.....I.D.....N..SK.NG..R.L.KE..EKI.ETQD..K.VRD..S...KGE.N.KE.KN..  |                                                                                                      |                                                   |                    |                              |                         |                                                  |                             | 436 |
| 7.5       | N...I.E.NPE--                                                                                          | YTK.NFLRIKGV.EMY.TE.CE..KV...T..AL...R...Y.LN...GKQRKNY.T.L.NE..EKITDYVK...TVQL...R...KENTKQ.YVD.V.. |                                                   |                    |                              |                         |                                                  |                             | 433 |

|           | 460                                                                                                            | 480 | 500 | 520 | 540 |     |
|-----------|----------------------------------------------------------------------------------------------------------------|-----|-----|-----|-----|-----|
| Consensus | NYIKVKLEKDDKKECDREIXEEIEIAINQLNKKKSPGIDGLGSEFYIVFKDILKXILKEVFKEIFKCKEMNERMGMLMGLIYKRKGAKTELXNYRPI TMLNTDLKILAK |     |     |     |     | 548 |
| 1.1       | .L.SRV.EGE.R.E.R.KR.SG.....YDD.ENG.I.K.....V.G.D.VA.K.....                                                     |     |     |     |     | 553 |
| 1.4       | .L.SRV.EGE.R.E.R.KR.SG.....SS.G.YD.ENG.IIK.....V.G.D.VD.K.....                                                 |     |     |     |     | 554 |
| 1.5       | .L.SRV.EGE.R.E.R.KR.SG.....SS.YD.ENG.I.K.....V.G.D.VA.K.....                                                   |     |     |     |     | 554 |
| 1.6       | .L.SRV.EGE.R.E.R.KR.SG.....Y.SS.YD.ENG.I.K.....V.G.D.VD.K.....                                                 |     |     |     |     | 553 |
| 1.8       | .L.SRV.EGE.R.E.R.KR.SG.....SS.G.YD.ENG.IIK.....V.G.D.VD.K.....                                                 |     |     |     |     | 554 |
| 1.9       | .L.SRV.EGE.R.E.R.KR.SG.....SS.G.YD.ENG.IIK.....V.G.D.VD.K.....                                                 |     |     |     |     | 554 |
| 1.10      | .L.SRV.EGE.R.E.R.KR.SG.....SS.YD.ENG.I.K.....V.G.D.VA.K.....                                                   |     |     |     |     | 554 |
| 1.11      | .L.SRV.EGE.R.E.R.KR.SG.....SS.YD.ENG.I.K.....V.G.D.VA.K.....                                                   |     |     |     |     | 555 |
| 2.1       | .....H.N.....E.....I.N.....G.....D.....Q.....                                                                  |     |     |     |     | 549 |
| 2.2       | .....I.N.....E.....K.....I.N.....G.....Q.....                                                                  |     |     |     |     | 549 |
| 2.3       | .....N.....D.D.T.....I.N.....G.....Q.....                                                                      |     |     |     |     | 549 |
| 2.5       | .....N.....E.....K.....I.N.....G.....T.....Q.....                                                              |     |     |     |     | 549 |
| 2.7       | .....N.....D.....I.N.....G.....Q.....                                                                          |     |     |     |     | 549 |
| 2.8       | .....N.....D.....I.N.....G.....Q.....                                                                          |     |     |     |     | 549 |
| 2.10      | .....N.....E.....I.N.....G.....D.....Q.....                                                                    |     |     |     |     | 549 |
| 2.11      | .....N.....E.....I.N.....G.....D.....Q.....                                                                    |     |     |     |     | 549 |
| S2.1      | .....N.....E.....I.N.....G.....D.....Q.....                                                                    |     |     |     |     | 549 |
| S2.2      | .....N.....E.....I.N.....G.....D.....Q.....                                                                    |     |     |     |     | 549 |
| 3.1       | KQ.T.IDEE...Q.G.RK.ES.....N.VC.E.IP.TD...LQKE.L.....H...E.L.K.....T                                            |     |     |     |     | 545 |
| 3.3       | KQ.T.IDEE...Q.G.RK.ES.....N.VC.E.IP.TD...LQKE.L.....H...E.L.K.....T                                            |     |     |     |     | 545 |
| 3.4       | KQ.T.VDEE...Q.G.RK.ES.....N.VC.E.IP.ID...LQKE.L.....H...E.L.K.....T                                            |     |     |     |     | 545 |
| 4.5       | EK.TA.N.E.EM.ES.TDL.T.D.SRNG.....PV.K.NV.IP.N.IYSD.YEKG.LTNS.KK.MV.M.....N.D.GD.K...LS...Y...                  |     |     |     |     | 536 |
| 4.10      | EK.TA.N.E.EM.ES.TDL.T.D.SRNG.....PV.K.NV.IP.N.IYSD.YEKG.LTNS.KK.MV.M.....N.D.GD.K...LS...Y...                  |     |     |     |     | 536 |
| 4.11      | EK.TA.N.E.EM.ES.TDL.T.D.SRNG.....PV.K.NV.IP.N.IYSD.YEKG.LTNS.KK.MV.M.....N.D.GD.K...LS...Y...                  |     |     |     |     | 536 |
| 4.14      | GK.TA.N.E.EM.ES.TDL.T.D.SRNG.....PV.K.NV.IP.N.IYSD.YEKG.LTNS.KK.MV.M...KN.D.GD.K...LS...Y...                   |     |     |     |     | 536 |
| 5.3       | .....N.....D.....I.N.....G.....D.....Q.....                                                                    |     |     |     |     | 548 |
| 5.4       | .....N.....D.....I.N.....G.....D.....Q.....                                                                    |     |     |     |     | 548 |
| 5.6       | .....N.....D.....I.N.....G.....D.....Q.....                                                                    |     |     |     |     | 548 |
| 5.7       | .....N.....D.....I.N.....G.....R.....Q.....                                                                    |     |     |     |     | 548 |
| 5.8       | .....Q.N.....D.D.....I.N.....V.....M.....Q.....                                                                |     |     |     |     | 548 |
| 6.1       | DQ.EG.VTE...M.E.QI...KES.M.SNG...L.V...K...V.AP...I.D.V.KQ.TTHL.RV.V...K.E.ND.R.F.L...F...                     |     |     |     |     | 547 |
| 6.2       | DQ.EG.VTE...M.E.QI...KES.M.SNG...L.V...K...V.AP...I.D.V.KQ.TTHL.RV.V...K.E.ND.R.F.L...F...                     |     |     |     |     | 547 |
| 6.4       | DQ.EG.VTE...M.E.QI...KES.M.SNG...L.V...K...V.AP...I.D.V.KQ.TTHL.RV.V...K.E.ND.R.F.L...F...                     |     |     |     |     | 547 |
| 6.5       | DQ.EG.VTE...M.E.QI...KES.M.SNG...L.V...K...V.AP...I.D.V.KQ.TTHL.RV.V...K.E.ND.R.F.L...F...                     |     |     |     |     | 547 |
| 6.6       | DQ.EG.VTE...M.E.QI...KES.M.SNG...L.V...K...V.AP...I.D.V.KQ.TTHL.RV.V...K.E.ND.R.F.L...F...                     |     |     |     |     | 547 |
| 6.7       | DQ.EG.VTE...M.E.QI...KES.M.SNG...L.V...K...V.AP...I.D.V.KQ.TTHL.RV.V...K.E.ND.R.F.L...F...                     |     |     |     |     | 547 |
| 7.5       | .TVN...SDEERET.E.D.NI...KQ.KETKVN...S...TH...KT.EE.TP.MKL.HMEERR.IP.ST.L.VITIL.N.CSPLN.E...LSL...Y...T         |     |     |     |     | 544 |

|           | 560           | 580      | 600           | 620               | 640     | 660        |                |                                |     |    |   |    |    |      |     |     |     |      |   |        |   |    |     |    |    |    |     |   |   |   |   |   |   |   |   |   |   |   |   |   |   |   |   |   |   |   |     |
|-----------|---------------|----------|---------------|-------------------|---------|------------|----------------|--------------------------------|-----|----|---|----|----|------|-----|-----|-----|------|---|--------|---|----|-----|----|----|----|-----|---|---|---|---|---|---|---|---|---|---|---|---|---|---|---|---|---|---|---|-----|
| Consensus | VLANRLKEVMPKI | IKTNQAYA | IKGRDIADVTMSI | KDTIDYMQEKKMNGFLI | SVDFEKA | FDRVEHTYLF | FDVLKTFGFGENFI | NWIKILYKGAFTKIKCNGFLTDCFKITRSI | 659 |    |   |    |    |      |     |     |     |      |   |        |   |    |     |    |    |    |     |   |   |   |   |   |   |   |   |   |   |   |   |   |   |   |   |   |   |   |     |
| 1.1       | S             | S        | T             | R                 | IND     | QKD        | L              | DF                             | G   | S  | K | VQ | R  | V    | R   | L   | 664 |      |   |        |   |    |     |    |    |    |     |   |   |   |   |   |   |   |   |   |   |   |   |   |   |   |   |   |   |   |     |
| 1.4       | S             | S        | T             | R                 | IND     | QKD        | L              | DF                             | G   | S  | K | VQ | R  | V    | R   | L   | 665 |      |   |        |   |    |     |    |    |    |     |   |   |   |   |   |   |   |   |   |   |   |   |   |   |   |   |   |   |   |     |
| 1.5       | S             | S        | T             | R                 | IND     | QKD        | L              | DF                             | G   | S  | K | V  | R  | V    | R   | L   | 665 |      |   |        |   |    |     |    |    |    |     |   |   |   |   |   |   |   |   |   |   |   |   |   |   |   |   |   |   |   |     |
| 1.6       | S             | S        | T             | R                 | IND     | QKD        | L              | DF                             | G   | S  | K | VQ | R  | V    | R   | R   | 664 |      |   |        |   |    |     |    |    |    |     |   |   |   |   |   |   |   |   |   |   |   |   |   |   |   |   |   |   |   |     |
| 1.8       | S             | S        | T             | R                 | IND     | QKD        | L              | DF                             | G   | S  | K | VQ | R  | V    | R   | L   | 665 |      |   |        |   |    |     |    |    |    |     |   |   |   |   |   |   |   |   |   |   |   |   |   |   |   |   |   |   |   |     |
| 1.9       | S             | S        | T             | R                 | IND     | QKD        | L              | DF                             | G   | S  | K | VQ | R  | V    | R   | L   | 665 |      |   |        |   |    |     |    |    |    |     |   |   |   |   |   |   |   |   |   |   |   |   |   |   |   |   |   |   |   |     |
| 1.10      | S             | S        | T             | R                 | IND     | QKD        | L              | DF                             | G   | S  | K | V  | R  | V    | R   | L   | 665 |      |   |        |   |    |     |    |    |    |     |   |   |   |   |   |   |   |   |   |   |   |   |   |   |   |   |   |   |   |     |
| 1.11      | S             | S        | T             | R                 | IND     | QKD        | L              | DF                             | G   | S  | K | VQ | R  | V    | R   | L   | 666 |      |   |        |   |    |     |    |    |    |     |   |   |   |   |   |   |   |   |   |   |   |   |   |   |   |   |   |   |   |     |
| 2.1       | S             | L        | S             | S                 | L       | S          | L              | S                              | L   | S  | K | V  | R  | V    | R   | L   | 660 |      |   |        |   |    |     |    |    |    |     |   |   |   |   |   |   |   |   |   |   |   |   |   |   |   |   |   |   |   |     |
| 2.2       | L             | S        | Y             | S                 | L       | S          | L              | S                              | L   | S  | N | V  | E  | V    | E   | L   | 660 |      |   |        |   |    |     |    |    |    |     |   |   |   |   |   |   |   |   |   |   |   |   |   |   |   |   |   |   |   |     |
| 2.3       | L             | S        | Y             | S                 | L       | S          | L              | S                              | L   | S  | N | V  | E  | V    | E   | L   | 656 |      |   |        |   |    |     |    |    |    |     |   |   |   |   |   |   |   |   |   |   |   |   |   |   |   |   |   |   |   |     |
| 2.5       | L             | S        | Y             | S                 | L       | S          | L              | S                              | L   | S  | N | V  | E  | V    | E   | L   | 660 |      |   |        |   |    |     |    |    |    |     |   |   |   |   |   |   |   |   |   |   |   |   |   |   |   |   |   |   |   |     |
| 2.7       | L             | S        | Y             | S                 | L       | S          | L              | S                              | L   | S  | N | V  | E  | V    | E   | L   | 660 |      |   |        |   |    |     |    |    |    |     |   |   |   |   |   |   |   |   |   |   |   |   |   |   |   |   |   |   |   |     |
| 2.8       | L             | S        | Y             | S                 | L       | S          | L              | S                              | L   | S  | N | V  | E  | V    | E   | L   | 660 |      |   |        |   |    |     |    |    |    |     |   |   |   |   |   |   |   |   |   |   |   |   |   |   |   |   |   |   |   |     |
| 2.10      | L             | S        | Y             | S                 | L       | S          | L              | S                              | L   | S  | N | V  | E  | V    | E   | L   | 660 |      |   |        |   |    |     |    |    |    |     |   |   |   |   |   |   |   |   |   |   |   |   |   |   |   |   |   |   |   |     |
| 2.11      | L             | S        | Y             | S                 | L       | S          | L              | S                              | L   | S  | N | V  | E  | V    | E   | L   | 660 |      |   |        |   |    |     |    |    |    |     |   |   |   |   |   |   |   |   |   |   |   |   |   |   |   |   |   |   |   |     |
| S2.1      | L             | S        | Y             | S                 | L       | S          | L              | S                              | L   | S  | N | V  | E  | V    | E   | L   | 660 |      |   |        |   |    |     |    |    |    |     |   |   |   |   |   |   |   |   |   |   |   |   |   |   |   |   |   |   |   |     |
| S2.2      | L             | S        | Y             | S                 | L       | S          | L              | S                              | L   | S  | N | V  | E  | V    | E   | L   | 660 |      |   |        |   |    |     |    |    |    |     |   |   |   |   |   |   |   |   |   |   |   |   |   |   |   |   |   |   |   |     |
| 3.1       | I             | T        | I             | I                 | E       | K          | EE             | YI                             | L   | QF | K | K  | V  | RK   | IL  | E   | 656 |      |   |        |   |    |     |    |    |    |     |   |   |   |   |   |   |   |   |   |   |   |   |   |   |   |   |   |   |   |     |
| 3.3       | I             | T        | I             | I                 | E       | K          | EE             | YI                             | L   | QF | K | K  | V  | RK   | IL  | E   | 656 |      |   |        |   |    |     |    |    |    |     |   |   |   |   |   |   |   |   |   |   |   |   |   |   |   |   |   |   |   |     |
| 3.4       | I             | T        | I             | I                 | E       | K          | EE             | YI                             | L   | QF | K | K  | V  | RK   | IL  | E   | 656 |      |   |        |   |    |     |    |    |    |     |   |   |   |   |   |   |   |   |   |   |   |   |   |   |   |   |   |   |   |     |
| 4.5       | V             | V        | N             | VLK               | T       | INN        | R              | I                              | W   | R  | E | ET | YI | L    | K   | MM  | MER | RYLQ | C | ADITSC | V | KD | 647 |    |    |    |     |   |   |   |   |   |   |   |   |   |   |   |   |   |   |   |   |   |   |   |     |
| 4.10      | V             | V        | N             | VLK               | T       | INN        | R              | I                              | W   | R  | E | ET | YI | L    | K   | MM  | MER | RYLQ | C | ADITSC | V | KD | 647 |    |    |    |     |   |   |   |   |   |   |   |   |   |   |   |   |   |   |   |   |   |   |   |     |
| 4.11      | V             | V        | N             | VLK               | T       | INN        | R              | I                              | W   | R  | E | ET | YI | L    | K   | MM  | MER | RYLQ | C | ADITSC | V | KD | 647 |    |    |    |     |   |   |   |   |   |   |   |   |   |   |   |   |   |   |   |   |   |   |   |     |
| 4.14      | V             | V        | N             | VLK               | T       | INN        | R              | I                              | W   | R  | E | ET | YI | L    | K   | MM  | MER | RYLQ | C | ADITSC | V | KD | 647 |    |    |    |     |   |   |   |   |   |   |   |   |   |   |   |   |   |   |   |   |   |   |   |     |
| 5.3       | L             | S        | R             | S                 | L       | S          | L              | S                              | L   | S  | L | V  | L  | V    | L   | V   | L   | V    | L | V      | L | V  | 659 |    |    |    |     |   |   |   |   |   |   |   |   |   |   |   |   |   |   |   |   |   |   |   |     |
| 5.4       | L             | S        | R             | S                 | L       | S          | L              | S                              | L   | S  | L | V  | L  | V    | L   | V   | L   | V    | L | V      | L | V  | 659 |    |    |    |     |   |   |   |   |   |   |   |   |   |   |   |   |   |   |   |   |   |   |   |     |
| 5.6       | L             | S        | R             | S                 | L       | S          | L              | S                              | L   | S  | L | V  | L  | V    | L   | V   | L   | V    | L | V      | L | V  | 659 |    |    |    |     |   |   |   |   |   |   |   |   |   |   |   |   |   |   |   |   |   |   |   |     |
| 5.7       | L             | S        | R             | S                 | L       | S          | L              | S                              | L   | S  | L | V  | L  | V    | L   | V   | L   | V    | L | V      | L | V  | 659 |    |    |    |     |   |   |   |   |   |   |   |   |   |   |   |   |   |   |   |   |   |   |   |     |
| 5.8       | L             | S        | R             | S                 | L       | S          | L              | S                              | L   | S  | L | V  | L  | V    | L   | V   | L   | V    | L | V      | L | V  | 659 |    |    |    |     |   |   |   |   |   |   |   |   |   |   |   |   |   |   |   |   |   |   |   |     |
| 6.1       | K             | L        | D             | S                 | GV      | K          | T              | IIS                            | R   | V  | Q | K  | RK | YV   | T   | NF  | E   | NKV  | N | LR     | C | N  | ISR | V  | I  | NV | 658 |   |   |   |   |   |   |   |   |   |   |   |   |   |   |   |   |   |   |   |     |
| 6.2       | K             | L        | D             | S                 | GV      | K          | T              | IIS                            | R   | V  | Q | K  | RK | YV   | T   | NF  | E   | NKV  | N | LR     | C | N  | ISR | V  | I  | NV | 658 |   |   |   |   |   |   |   |   |   |   |   |   |   |   |   |   |   |   |   |     |
| 6.4       | K             | L        | D             | S                 | GV      | K          | T              | IIS                            | R   | V  | Q | K  | RK | YV   | T   | NF  | E   | NKV  | N | LR     | C | N  | ISR | V  | I  | NV | 658 |   |   |   |   |   |   |   |   |   |   |   |   |   |   |   |   |   |   |   |     |
| 6.5       | K             | L        | D             | S                 | GV      | K          | T              | IIS                            | R   | V  | Q | K  | RK | YV   | T   | NF  | E   | NKV  | N | LR     | C | N  | ISR | V  | I  | NV | 658 |   |   |   |   |   |   |   |   |   |   |   |   |   |   |   |   |   |   |   |     |
| 6.6       | K             | L        | D             | S                 | GV      | K          | T              | IIS                            | R   | V  | Q | K  | RK | YV   | T   | NF  | E   | NKV  | N | LR     | C | N  | ISR | V  | I  | NV | 658 |   |   |   |   |   |   |   |   |   |   |   |   |   |   |   |   |   |   |   |     |
| 6.7       | K             | L        | D             | S                 | GV      | K          | T              | IIS                            | R   | V  | Q | K  | RK | YV   | T   | NF  | E   | NKV  | N | LR     | C | N  | ISR | V  | I  | NV | 658 |   |   |   |   |   |   |   |   |   |   |   |   |   |   |   |   |   |   |   |     |
| 7.5       | I             | I        | R             | VRS               | SP      | HG         | P              | T                              | T   | I  | C | T  | R  | VVSS | DKD | GEG | L   | M    | L | C      | I | L  | N   | NF | ME | Q  | A   | M | R | R | Y | K | I | L | N | K | S | C | V | V | N | T | P | L | E | V | 655 |

|           | 680                   | 700        | 720                  | 740                       | 760               |                                     |
|-----------|-----------------------|------------|----------------------|---------------------------|-------------------|-------------------------------------|
| Consensus | RQGCPLSALLYSLVAEPLGLA | IKQETKIKG  | IKIEEEDEGKIYQYADDTTL | IVKDKKSVKEAMKKVQEFCKGTGAK | INENKTVYMRFGKADIL | TDCFQFKEVE-EIKILGI 769              |
| 1.1       | A                     | V.H.DR     | EV-GGVN-F            | LQ.LA                     | Q.EI.H            | S.D.L.RTEA.SGH.T.MD- 772            |
| 1.4       | A                     | V.H.DR     | EV-GGVN-F            | LQ.LA                     | Q.ETI.H           | S.D.L.RTEA.SGH.T.MD- 773            |
| 1.5       | A                     | V.H.DI     | EV-GGVN-F            | L.LA                      | K.ET.H            | S.D.L.ETEA.SGH.T.MD- 773            |
| 1.6       | A.K                   | V.H.DR     | EV-GGVN-F            | LQELA                     | K.ET.H            | S.D.G.L.RTEA.SGH.T.MD- 772          |
| 1.8       | A                     | V.H.DR     | EV-GGVN-F            | LQ.LA                     | Q.ETI.H           | S.D.L.RTEA.SGH.T.MD- 773            |
| 1.9       | A                     | V.H.DR     | EV-GGVN-F            | LQ.LA                     | Q.ETI.H           | S.D.L.RTEA.SGH.T.MD- 773            |
| 1.10      | A                     | V.H.DI     | EV-GGVN-F            | L.LA                      | K.ET.H            | S.D.L.ETEA.SGH.T.MD- 773            |
| 1.11      | A                     | V.H.DR     | EV-GGVN-F            | LQ.LA                     | Q.ETI.H           | S.D.L.RTEA.SGH.T.MD- 774            |
| 2.1       | I                     |            |                      | E                         |                   | S.Q.R.L 770                         |
| 2.2       | I                     |            |                      | E                         |                   | S.Q.R.L 770                         |
| 2.3       | I                     |            |                      | E                         |                   | S.Q.R.L.M 766                       |
| 2.5       |                       |            |                      | E                         |                   | S.Q.R.L 770                         |
| 2.7       | I                     | T          |                      | E                         |                   | S.Q.R.R.L 770                       |
| 2.8       | I                     | T          |                      | E                         |                   | S.Q.R.R.L 770                       |
| 2.10      | I                     |            |                      | E                         |                   | S.Q.R.L 770                         |
| 2.11      | I                     |            |                      | E                         |                   | S.Q.R.L 770                         |
| S2.1      | I                     |            |                      | E                         |                   | S.Q.R.L 770                         |
| S2.2      | I                     |            |                      | E                         |                   | S.Q.R.L 770                         |
| 3.1       |                       | NE.E       | E.NKVNK.MF           | G.E                       | I.Q               | S.S.V.D.K.ETD.AE.TN.V 766           |
| 3.3       |                       | NE.E       | E.NKVNK.MF           | G.E                       | K.I.Q             | S.S.V.D.K.ETD.AE.TN.V 766           |
| 3.4       |                       | NE.E       | E.NKVNK.MF           | G.E                       | I.Q               | S.S.V.D.K.ETD.AE.TN.V 766           |
| 4.5       | M                     | T.S.T      | DN.Q.R.LC.KGTDL.H.F  | I                         | IEK.EEILNRY.N     | KE.K.L.INV.PEKIK.ETVDM. 758         |
| 4.10      | M                     | T.S.T      | DN.Q.R.LC.KGTDL.H.F  | I                         | IEK.EEILNRY.N     | KE.K.L.INV.PEKIK.EKVDM. 758         |
| 4.11      | M                     | T.S.T      | DN.Q.R.LC.KGTDL.H.F  | I                         | IEK.EEILNRY.N     | KE.K.L.INV.PEKIK.EKVDM. 758         |
| 4.14      | M                     | T.S.T      | DN.Q.R.LC.KGTDL.H.F  | I                         | IEK.EEILNRY       | KE.K.L.INV.PEKIK.EKVDM. 758         |
| 5.3       | I                     |            |                      | E                         |                   | S.Q.R.L 769                         |
| 5.4       | I                     |            |                      | E                         |                   | S.Q.R.R 769                         |
| 5.6       | I                     |            |                      | E                         |                   | S.Q.R.L 769                         |
| 5.7       | I                     |            |                      | E                         |                   | S.Q.R.L 769                         |
| 5.8       | I                     |            | D                    | E                         |                   | S.Q.R.L 769                         |
| 6.1       | K                     | Q.T.A.S    | IRDKE.H.V.T.E.Q      | L.MQ                      | IN.IIERY.N.S      | V.ME.V.L.N.C.P.V.K.DQK- 768         |
| 6.2       | K                     | Q.T.A.S    | IRDKE.H.V.T.E.Q      | L.MQ                      | IN.IIERY.N.S      | V.ME.V.L.N.C.P.V.K.DQK- 768         |
| 6.4       | K                     | Q.T.A.S    | IRDKE.H.V.T.E.Q      | L.IQ                      | IN.IIERY.N.S      | V.ME.V.L.N.C.P.V.K.DQK- 768         |
| 6.5       | K                     | Q.T.A.S    | IRDKE.H.V.T.E.Q      | L.IQ                      | IN.IIERY.N.S      | V.ME.V.L.N.C.P.V.K.DQK- 768         |
| 6.6       | K                     | Q.T.A.S    | IRDKE.H.V.T.E.Q      | L.MQ                      | IN.IIERY.N.S      | V.ME.V.L.N.C.P.V.K.DQK- 768         |
| 6.7       | K                     | Q.T.A.S    | IRDKE.H.V.T.E.Q      | L.MQ                      | IN.IIERY.N.S      | V.ME.V.L.N.C.P.V.K.DQK- 768         |
| 7.5       | M                     | ISI.S.ATLV | .DKE.R.Q.PYGGVS-L.H  | FT.R.MR.I                 | RI.NHIEVYG.AS     | .IE.SEI.SI.GVGLSGCDIP.VAKEQTV.V 765 |



|           |                                                                                                                                                                                                                               |     |     |     |     |     |
|-----------|-------------------------------------------------------------------------------------------------------------------------------------------------------------------------------------------------------------------------------|-----|-----|-----|-----|-----|
|           | 900                                                                                                                                                                                                                           | 920 | 940 | 960 | 980 |     |
| Consensus | K I V K K Y L Q E E N K A E W K K V M K Y F L N K V G N F N L G E D I L W M K T K N W M T E K L P G F Y Q E I L S A W G K F L D G V F Y Q V K G R E N L L N Q P L F L N K S I L K Q G K E L F F K K W M E V G I L R I R D V L |     |     |     |     | 991 |
| 1.1       | .M.R..D.D..A..RT.E..S.S.....DN..C.RM.KF..G..D..K.LIG.....TC.HFN IQ...I.....SG..N.E.VV..R..W...T.V....                                                                                                                         |     |     |     |     | 994 |
| 1.4       | .M.R..D.D..A..RT.E..S.S.....M.DN..C.RM.KF..G..D..K.LIG.....TC.HFN IQ...I.....SG..N.E.VV..R..W...T.V....                                                                                                                       |     |     |     |     | 995 |
| 1.5       | .M.R..D.D..A..RT.E..S.S.....DN..C.RM.KF..G..D..K.LIG.....TC.HFN IQ...I.....SG..N.E.VV..R..W...T.V....                                                                                                                         |     |     |     |     | 995 |
| 1.6       | .M.R..D.D..A..RT.E..S.S.....DN..Y.RM.KF..G..D..K.LIG.....TC.HFN IQ...I.....SG..N.E.VV..R..W...T.V....                                                                                                                         |     |     |     |     | 994 |
| 1.8       | .M.R..D.D..A..RT.E..S.S.....M.DN..C.RM.KF..G..D..K.LIG.....TC.HFN IQ...I.....SG..N.E.VV..R..W...T.V....                                                                                                                       |     |     |     |     | 995 |
| 1.9       | .M.R..D.D..A..RT.E..S.S.....M.DN..C.RM.KF..G..D..K.LIG.....TC.HFN IQ...I.....SG..N.E.VV..R..W...T.V....                                                                                                                       |     |     |     |     | 995 |
| 1.10      | .M.R..D.D..A..RT.E..S.S.....DN..C.RM.KF..G..D..K.LIG.....TC.HFN IQ...I.....SG..N.E.VV..R..W...T.V....                                                                                                                         |     |     |     |     | 995 |
| 1.11      | .M.R..D.D..A..RT.E..S.S.....DN..C.RM.KF..G..D..K.LIG.....TC.HFN IQ...I.....SG..N.E.VV..R..W...T.V....                                                                                                                         |     |     |     |     | 996 |
| 2.1       | .....L.....ST.....L.....E.....D.....                                                                                                                                                                                          |     |     |     |     | 992 |
| 2.2       | .....I.....L.....ST.....L.....E.....D.....                                                                                                                                                                                    |     |     |     |     | 992 |
| 2.3       | .....L.....L.....ST.....L.....E.....D.....                                                                                                                                                                                    |     |     |     |     | 988 |
| 2.5       | .....L.....L.....ST.....L.....E.....D.....                                                                                                                                                                                    |     |     |     |     | 992 |
| 2.7       | .....I.....L.....L.....ST.....L.....E.....D.....                                                                                                                                                                              |     |     |     |     | 992 |
| 2.8       | .....I.....L.....L.....ST.....L.....E.....D.....                                                                                                                                                                              |     |     |     |     | 992 |
| 2.10      | .....L.....L.....L.....ST.....L.....E.....D.....                                                                                                                                                                              |     |     |     |     | 992 |
| 2.11      | .....L.....L.....L.....ST.....L.....E.....D.....                                                                                                                                                                              |     |     |     |     | 992 |
| S2.1      | .....L.....L.....L.....ST.....L.....E.....D.....                                                                                                                                                                              |     |     |     |     | 992 |
| S2.2      | .....L.....L.....L.....ST.....L.....E.....D.....                                                                                                                                                                              |     |     |     |     | 992 |
| 3.1       | .R.....E.K.....T.....C.....M.DG.....A.....N.E.R.....G.....N.KQ.E.SPH...I.....NN.S...V.YY...I...KV..I                                                                                                                          |     |     |     |     | 988 |
| 3.3       | .R.I.....E.K.....T.....C.....M.DG.....A.....N.E.R.....N.KQ.E.SPH...I.....NN.S...V.YY...I...KV..I                                                                                                                              |     |     |     |     | 988 |
| 3.4       | .R.I.....E.K.....T.....C.....M.DG.....A.....N.E.R.....N.KQ.E.SPH...I.....NN.S...V.YY...I...KV..I                                                                                                                              |     |     |     |     | 988 |
| 4.5       | .T.N..WK..-..HV..D..R.....C--EIQ.Y.....P.EN.MN.V.E..K.VIK..D.RKHIDCSF-SK.EI.K.....EY.KEGNNTI.Y...FNA..KQ.K.I                                                                                                                  |     |     |     |     | 976 |
| 4.10      | .T.N..WK..-..HV..D..R.....C--EMQ.Y.....P.EN.MN.V.E..K.VIK..D.RKHIDCSF-SK.EI.K.....EY.KEGNNTI.Y...FNA..KQ.K.I                                                                                                                  |     |     |     |     | 976 |
| 4.11      | .T.N..WK..-..HV..D..R.....C--EMQ.Y.....P.EN.MN.V.E..K.VIK..D.RKHIDCSF-SK.EI.K.....EY.KEGNNTI.Y...FNA..KQ.K.I                                                                                                                  |     |     |     |     | 976 |
| 4.14      | .T.N..WK..-..HV..D..R.....C--EMQ.Y.....P.EN.MN.V.E..K.VIK..D.RKHIDCSF-SK.EI.K.....EY.KEGNNTI.Y...FNA..KQ.K.I                                                                                                                  |     |     |     |     | 976 |
| 5.3       | .....L.....L.....L.....ST.....L.....E.....D.....                                                                                                                                                                              |     |     |     |     | 991 |
| 5.4       | .....L.....L.....L.....ST.....L.....E.....D.....                                                                                                                                                                              |     |     |     |     | 991 |
| 5.6       | .....L.....L.....L.....ST.....L.....E.....D.....                                                                                                                                                                              |     |     |     |     | 991 |
| 5.7       | .....L.....L.....L.....ST.....L.....E.....D.....                                                                                                                                                                              |     |     |     |     | 991 |
| 5.8       | .....L.....L.....L.....ST.....L.....E.....D.....                                                                                                                                                                              |     |     |     |     | 991 |
| 6.1       | .V.I.....NKKF.....H..RFY..C.G..MND.....L.QS.ITGI.E..R.V.Q..SE..NH.DFKPE..NM.....AN..T.E..VY..Y.L.A.VCQVK...990                                                                                                                |     |     |     |     | 990 |
| 6.2       | .V.I.....NK.F.....H..RFY..C.G..MND.....L.QS.ITGI.E..R.V.Q..SE..NH.DFKPE..NM.....GN..T.E..VY..Y.L.A.VCQVK...990                                                                                                                |     |     |     |     | 990 |
| 6.4       | .V.I.....NK.F.....H..RFY..C.G..MND.....L.QS.ITGI.E..R.V.Q..SE..NH.DFKPE..NM.....GN..T.E..IY..Y.L.A.VCQVK...990                                                                                                                |     |     |     |     | 990 |
| 6.5       | .V.I.....NK.F.....H..RFY..C.G..MND.....L.QS.ITGI.E..R.V.Q..SE..NH.DFKPE..NM.....GN..T.E..VY..Y.L.A.VCQVK...990                                                                                                                |     |     |     |     | 990 |
| 6.6       | .V.I.....NK.F.....H..RFY..C.G..MND.....L.QS.ITGI.E..R.V.Q..SE..NH.DFKPE..NM.....GN..T.K..VY..Y.L.A.VCQVK...990                                                                                                                |     |     |     |     | 990 |
| 6.7       | .V.I.....NK.F.....H..RFY..C.G..MND.....L.QS.ITGI.E..R.V.Q..SE..NH.DFKPE..NM.....GN..T.K..VY..Y.L.A.VCQVK...990                                                                                                                |     |     |     |     | 990 |
| 7.5       | .M..L.YGNEEFG..GF.REY.S.SSG--C..EGVF.SL.KP.Y.NI.V...VC...SE.VME.G.ECENINQIHK..V...PK.QMR.RMFYNRLY.KA..RQVK.MV                                                                                                                 |     |     |     |     | 985 |

|           | 1,000                                                                                                         | 1,020                   | 1,040                          | 1,060                    | 1,080                | 1,100                   |      |
|-----------|---------------------------------------------------------------------------------------------------------------|-------------------------|--------------------------------|--------------------------|----------------------|-------------------------|------|
| Consensus | YEFKEGFLPKQYIVDL                                                                                              | MEEAKEEYSRKEI           | EKKLEIVKGAIPKEWITRIENME-       | EXGNEKVVHYYL-K-          | EKLCNFKDCLLKDFYVYFRD | SVFKEPIANNFWVQRXNSVKKEN | 1099 |
| 1.1       | .....QV..VI.V.D...                                                                                            | DFN.QDLI.EYD.I.N...     | A..L.....NKQS.D.I.KF-G-        | WW.L..STV.MI.GF..G...    | K.RS.EY.IRMFKD.NED.  |                         | 1102 |
| 1.4       | .....V..VI.V.D...                                                                                             | DFN.QDLI.EYD.I.N...     | A..L.....NKQS.D.I.KF-G-        | WW.L..STV.MI.GF..G...    | K.RS.EY.IRMFKD.NED.  |                         | 1103 |
| 1.5       | .....V..VI.V.D...                                                                                             | DFN.QDLI.EYD.I.N...     | A..L.....NKQS.D.I.RF-G-        | WW.L..STV.MI.GF..G...    | K.RS.EY.IRMFKD.NED.  |                         | 1103 |
| 1.6       | .....V..VI.V.D...                                                                                             | DFN.QDLI.EYD.I.N...     | A..L.....NKHS.DMI.RF-G-        | YW.L..STV.MI.GF..G...    | K.RS.EY.IRMFKD.NED.  |                         | 1102 |
| 1.8       | .....V..VI.V.D...                                                                                             | DFN.QDLI.EYD.I.N...     | A..L.....NKQS.D.I.KF-G-        | WW.L..STV.MI.GF..G...    | K.RS.EY.IRMFKD.NED.  |                         | 1103 |
| 1.9       | .....V..VI.V.D...                                                                                             | DFN.QDLI.EYD.I.N...     | A..L.....NKQS.D.I.KF-G-        | WW.L..STV.MI.GF..G...    | K.RS.EY.IRMFKD.NED.  |                         | 1103 |
| 1.10      | .....V..VI.V.D...                                                                                             | DFN.QDLI.EYD.I.N...     | A..L.....NKQS.D.I.RF-G-        | WW.L..STV.MI.GF..G...    | K.RS.EY.IRMFKD.NED.  |                         | 1103 |
| 1.11      | .....V..VI.V.D...                                                                                             | DFN.QDLI.EYD.I.N...     | A..L.....NKQS.D.I.RF-G-        | WW.L..STV.MI.GF..G...    | K.RS.EY.IRMFKD.NED.  |                         | 1104 |
| 2.1       | ..K...T.....                                                                                                  | .....V...N...T.....     | .....C.....I.....              | .....G.....D.....        | .....Q.....L.....    |                         | 1100 |
| 2.2       | ..K...T.....                                                                                                  | .....V...N...T.....     | .....G.....I...N...            | .....G.....D.....        | .....Q.....L.....    |                         | 1100 |
| 2.3       | ..K...T.....                                                                                                  | .....V...N...T.....     | .....G.....I.....              | .....G.....D.....        | .....Q.....L.....    |                         | 1096 |
| 2.5       | ..K...T.....                                                                                                  | .....V...N...T.....     | .....C.....I.....              | .....G.....D.....        | .....Q.....L.....    |                         | 1100 |
| 2.7       | ..K...T.....                                                                                                  | .....V...N...T...S...   | .....G.....I.....              | .....G.....I.....        | .....Q.....L...N...  |                         | 1100 |
| 2.8       | ..K...T.....                                                                                                  | .....V...N...T...S...   | .....G.....I.....              | .....G.....I.....        | .....Q.....L...N...  |                         | 1100 |
| 2.10      | ..K...T.....                                                                                                  | .....V...N...T.....     | .....C.....I...C...            | .....G.....D.....        | .....Q.....L.....    |                         | 1100 |
| 2.11      | ..K...T.....                                                                                                  | .....V...N...T.....     | .....C.....I.....              | .....G.....D.....        | .....Q.....L.....    |                         | 1100 |
| S2.1      | ..K...T.....                                                                                                  | .....V...N...T.....     | .....C.....I.....              | .....G.....D.....        | .....Q.....L.....    |                         | 1100 |
| S2.2      | ..K...T.....                                                                                                  | .....V...N...T.....     | .....C.....I.....              | .....G.....D.....        | .....Q.....L.....    |                         | 1100 |
| 3.1       | .....TE..VI.T.....                                                                                            | .....N.....N.D.I.Q..... | RS..KF--KEKET.E.Y.KT-G-        | ..I...NE.TV.NI.CF..EN... | T..KY.IEKYKN..ANE    |                         | 1096 |
| 3.3       | .....TE..VI.T.....                                                                                            | .....N.....N.D.I.Q..... | RS..F--KEKET.E.Y.KT-G-         | ..IG..NE.TV.NI.CF..EN... | T..KY.IEKYKN..ANE    |                         | 1096 |
| 3.4       | .....TE..VI.T.....                                                                                            | .....N.....N.D.I.Q..... | KS..F--KEKET.E.Y.KT-G-         | ..I...NE.TV.NI.CF..EN... | T..KY.IEKYKN..ANE    |                         | 1096 |
| 4.5       | ..VIP.YVQA.V.K.A.II.NY.NE.KRV.                                                                                | NQFNLLKN...KEI...KL-    | MHRDEGRGINF--NQYA...           | GI..M..SCL.KD.VT.K.EEY.  | KRLYPNIE.KE          |                         | 1084 |
| 4.10      | ..VIP.YVQAHV.K.A.II.NY.NETKRV.                                                                                | Q.NNL.KN...KEI...KF-    | MHSDEGRVINF--NQYA...           | GI..M..SCL.KD.VT.K.EEY.  | KRLYPNIE.KE          |                         | 1084 |
| 4.11      | ..VIP.YVQAHV.K.A.II.NY.NETKRV.                                                                                | Q.NNL.KN...KEI...KF-    | MHSDEGRVINF--NQYA...           | GI..M..SCL.KD.VT.K.EEY.  | KRLYPNIE.KE          |                         | 1084 |
| 4.14      | ..VIP.YVQAHV.K.A.II.NY.NETKRV.                                                                                | Q.NNL.KN...KEI...KL-    | MHRDEGRVINF--NQYA...           | GI..M..SCLCKD.VT.K.EEY.  | KRLYPNIE.KE          |                         | 1084 |
| 5.3       | ..K...N.....                                                                                                  | .....V...N...T.....     | .....G.....I.....              | .....G.....D.....        | .....Q.....L...E...  |                         | 1099 |
| 5.4       | ..K...N.....                                                                                                  | .....V...N...T...S...   | .....G.....I...N...            | .....G.....D.....        | .....Q.....L...E...  |                         | 1099 |
| 5.6       | ..K...N.....                                                                                                  | .....V...N...T.....     | .....G.....I.....              | .....G.....D.....        | .....Q.....L...E...  |                         | 1099 |
| 5.7       | ..K...T.....                                                                                                  | .....V...N...T.....     | .....G.....I...N...            | .....G.....D.....        | .....Q.....L...E...  |                         | 1099 |
| 5.8       | ..K...T.....                                                                                                  | .....V...N...T.....     | .....C..G..I.....              | .....G.....D.....        | .....Q.....L...E...  |                         | 1099 |
| 6.1       | ..I.....S.V...A.DGIGKDIK.ETLV.QF...                                                                           | S.L...VK.QNN-S-DN-K.F-- | EKD.QE.V..N..IC..NK.H.R.VSEQ.. | KKIFVEIDE.G              |                      |                         | 1096 |
| 6.2       | ..I.....S.V...A.DGIGKDIK.ETLV.QF...                                                                           | S.L...VK.QNN-S-DN-K.F-- | EKD.QE.V..N..IC..NK.H.R.VSEQ.. | KKIFVEIDE.G              |                      |                         | 1096 |
| 6.4       | ..I.....S.V...A.DGIGKDIK.ETLV.QF...                                                                           | S.L...VK.QNN-S-DN-K.F-- | EKD.QE.V..N..IC..NK.H.R.VSEQ.. | KKIFVEIDE.G              |                      |                         | 1096 |
| 6.5       | ..I.....S.V...A.DGIGKDIK.ETLV.QF...                                                                           | S.L...VK.QNN-S-DN-K.F-- | EKD.QE.V..N..IC..NK.H.R.VSEQ.. | KKIFVEIDE.G              |                      |                         | 1096 |
| 6.6       | ..I.....S.V...A.DGIGKDIK.ETLV.QF...                                                                           | S.L...VK.QNN-S-DN-K.F-- | EKD.QE.V..N..IC..NK.H.R.VSEQ.. | KKIFVEIDE.G              |                      |                         | 1096 |
| 6.7       | ..I.....S.V...A.DGIGKDIK.ETLV.QF...                                                                           | S.L...VK.QNN-S-DN-K.F-- | EKD.QE.V..N..IC..NK.H.R.VSEQ.. | KKIFVEIDE.G              |                      |                         | 1096 |
| 7.5       | ..VK...NRA.Y.SVV.WDD.IKKSQVDSVC.NIRVSL..R.VEM..RESARP..WGMPEMFIV.NG.KICLS.VIT.TI.GI.VEKEI.L.ASE.V.PKLFPNLNVKT |                         |                                |                          |                      |                         | 1096 |

|           | 1,120                           | 1,140            | 1,160                | 1,180                      | 1,200              | 1,220             |                                        |      |
|-----------|---------------------------------|------------------|----------------------|----------------------------|--------------------|-------------------|----------------------------------------|------|
| Consensus | IWKNM                           | RGKII            | ETKLECFEYFIRHKAIFTEC | ILTKIGMEENATCKVCFQEDEGI    | LHLFLYCKE          | LECFYXKCKKMLKDLL- | KXWDEEELEWXTLVMFGWNMENKKNKFFVNLLI 1209 |      |
| 1.1       | A.IK.LVQS.V.NL.L.N.V.DI.N       | SV               | QDA.F                | N.KD.NE.Y.SIILT.K-GER.D    | EKVL.L.V.K.CN.E.LI | V                 | 1211                                   |      |
| 1.4       | A.IN.LVQS.V.NL.L.N.V.DI.N       | SV               | QDA.F                | N.KD.NE.SIILT.K-GER.D      | EKVL.L.V.K.CN.E.LI | V                 | 1212                                   |      |
| 1.5       | A.IN.LVQS.V.NL.L.N.V.DI.N       | SV               | QDA.F                | N.KD.NE.SIILT.K-GER.D      | EKVL.L.V.K.CN.E.LI | V                 | 1212                                   |      |
| 1.6       | A.IK.LVQS.V.NL.L.N.V.DI.N       | SV               | QDA.F                | N.KD.NE.SIILT.K-GER.D      | EKVL.L.V.K.CN.E.LI | V                 | 1211                                   |      |
| 1.8       | A.IN.LVQS.V.NL.L.N.V.DI.N       | SV               | QDA.F                | N.KD.NE.SIILT.K-GER.D      | EKVL.L.V.K.CN.E.LI | V                 | 1212                                   |      |
| 1.9       | A.IN.LVQS.V.NL.L.N.V.DI.N       | SV               | QDA.F                | N.KD.NE.SIILT.K-GER.D      | EKVL.L.V.K.CN.E.LI | V                 | 1212                                   |      |
| 1.10      | A.IN.LVQS.V.NL.L.N.V.DI.N       | SV               | QDA.F                | N.KD.NE.SIILT.K-GER.D      | EKVL.L.V.K.CN.E.LI | V                 | 1212                                   |      |
| 1.11      | A.IK.LEQS.V.NL.L.N.V.DI.N       | SV               | QDA.F                | N.KD.NE.SIILT.K-GER.D      | EKVL.L.V.K.CN.E.LI | V                 | 1213                                   |      |
| 2.1       | R                               | HI.Q             | K.Q                  | D                          | Q                  | N                 | 1210                                   |      |
| 2.2       | R                               | QR.P             | M.Q                  | D                          | Q                  | N                 | 1210                                   |      |
| 2.3       | I                               | QR.P             | K.Q                  | D                          | Q                  | N                 | 1206                                   |      |
| 2.5       | R                               | HI.Q             | M.Q                  | D                          | Q                  | N                 | 1210                                   |      |
| 2.7       | I                               | QR.H             | M.Q                  | D                          | DQ                 | N                 | 1210                                   |      |
| 2.8       | I                               | QR.H             | M.Q                  | D                          | DQ                 | N                 | 1210                                   |      |
| 2.10      | R                               | HI.Q             | K.Q                  | D                          | Q                  | N                 | 1210                                   |      |
| 2.11      | R                               | HI.Q             | K.Q                  | D                          | Q                  | N                 | 1210                                   |      |
| S2.1      | R                               | HI.Q             | K.Q                  | D                          | Q                  | N                 | 1210                                   |      |
| S2.2      | R                               | HI.Q             | K.Q                  | D                          | Q                  | N                 | 1210                                   |      |
| 3.1       | G.K.RYV.V.L.FL                  | SDV.N            | QSGM.QK.E.F.M        | QK.G.LKD.VLI.G             | GD.N.T.NRV.L       | KN.E.I.C          | 1206                                   |      |
| 3.3       | G.K.RYV.V.L.FL                  | SDV.N            | QSGM.QK.E.F.M        | Q.G.LKD.VLI.G              | GD.N.T.NRV.L       | KN.E.I.C          | 1206                                   |      |
| 3.4       | G.K.RYV.V.L.FL                  | SDV.N            | QSGM.QK.E.F.M        | Q.G.LKD.VLI.G              | GD.N.T.NRV.L       | KN.E.I.C          | 1206                                   |      |
| 4.5       | Q.L.AWWKSPV.N.D.I.L.QNCLLS.MR.C | LAND.R           | NE                   | FK.K.IG.I.E.NEMG-IENEVVDE  | E.FL.CKT.G         | TR.I.FIL          | 1194                                   |      |
| 4.10      | QHV.AWWKSPV.N.D.I.L.QNCLLS.MR.C | LAND.R           | NE                   | FK.K.IG.I.E.NEMG-IENEVVDE  | E.FL.CKT.G         | TR.I.FFL          | 1194                                   |      |
| 4.11      | QHV.AWWKSPV.N.D.I.L.QNCLLS.MR.C | LAND.R           | NE                   | FK.K.IG.I.E.NEMG-IENEVVDE  | E.FL.CKT.G         | TR.I.FFL          | 1194                                   |      |
| 4.14      | Q.L.AWWKSPV.N.D.I.L.QNCLLS.MR.C | LAND.R           | NE                   | FK.K.IG.I.E.NEMG-IENEVVDD  | E.FL.CKT.G         | TR.M.FIL          | 1194                                   |      |
| 5.3       | R                               | R                | QR.P                 | M.Q                        | D                  | Q                 | N                                      | 1209 |
| 5.4       | R                               | HI.Q             | M.Q                  | D                          | Q                  | N                 | 1209                                   |      |
| 5.6       | R                               | R                | QR.P                 | M.Q                        | D                  | Q                 | N                                      | 1209 |
| 5.7       | E                               | R                | QR.P                 | M.Q                        | D                  | QF                | N                                      | 1209 |
| 5.8       | R                               | QR.P             | D                    | M.Q                        | D                  | Q                 | N                                      | 1209 |
| 6.1       | LKW.YLDA.I.MLD                  | NV.TK.AQ.SS      | L.I.GL.N.M           | K.V.NT.MA.L.E.M.QMMASETEQI | E.TEWYKI           | LFGFNGSKTRIA      | FL 1207                                |      |
| 6.2       | LKW.YLDA.I.MLD                  | NV.TK.AQ.SS      | L.I.GL.N.M           | K.V.NT.MA.L.E.M.QMMPSETEQI | EDTEWYKI           | LFGFNGSKTRIA      | FL 1207                                |      |
| 6.4       | LKW.YLDA.I.MLD                  | NV.TK.AQ.SS      | L.I.GL.N.M           | K.V.NT.MA.L.E.M.QMMPSETEQI | EDTEWYKI           | LFGFNGSKTRIA      | FL 1207                                |      |
| 6.5       | LKW.YLDA.I.MLD                  | NV.TK.AQ.SS      | L.I.GL.N.M           | K.V.NT.MA.L.E.M.QMMPSETEQI | EDTEWYKI           | LFGFNGSKTRIA      | FL 1207                                |      |
| 6.6       | LKW.YLDA.I.MLD                  | NV.TK.AQ.SS      | L.I.GL.N.M           | K.V.NT.MA.L.E.M.QMMPSETEQI | EDTEWYKI           | LFGFNGSKTRIA      | FL 1207                                |      |
| 6.7       | LKW.YLDA.I.MLD                  | NV.TK.AQ.SS      | L.I.GL.N.M           | K.V.NT.MA.L.E.M.QMMPSETEQI | EDTEWYKI           | LFGFNGSKTRIA      | FL 1207                                |      |
| 7.5       | LNV.YNSLDC.NLDFKL               | NR.Y.KVVIHQ.NRNV | RE.D.KSDP.TLM.I.FE   | GF.HE.L.QLI                | NW-GKNAQG-N        | KQ.FL.E.TNC.E.N   | CN 1204                                |      |



|           | 1,240    | 1,260 | 1,280 | 1,300    |        |         |       |        |        |        |        |       |        |        |           |         |             |      |         |       |       |      |
|-----------|----------|-------|-------|----------|--------|---------|-------|--------|--------|--------|--------|-------|--------|--------|-----------|---------|-------------|------|---------|-------|-------|------|
| Consensus | MMI      | KKC   | IWERR | NAKQEKVV | LNWVNF | KRKMERY | I     | EXL    | YFYFK  | GEDML  | PSFYD  | VFNDE | EVYN   | VLNGL  | -         | KWKMPKE | -----       | 1282 |         |       |       |      |
| 1.1       | LM       | SAV   | VA    | K        | A      | D       |       | V      | K      | V      | C      | F     | L      | QEA    | TQ        | SKI     | DT          | GM   | F       | ----- | 1283  |      |
| 1.4       | LM       | SA    | VA    | K        | A      | D       |       | V      | K      | V      | C      | F     | L      | QEA    | TQ        | SKI     | DT          | GL   | F       | ----- | 1284  |      |
| 1.5       | LM       | SA    | VA    | K        | A      | D       |       | V      | K      | V      | FVLLF  |       |        |        |           |         |             |      |         | ----- | 1253  |      |
| 1.6       | LM       | SA    | VA    | K        | A      | DA      |       | V      | K      | V      | C      | F     | L      | QEA    | TQ        | SKI     | DT          | GM   | F       | ----- | 1283  |      |
| 1.8       | LM       | SA    | VA    | K        | A      | D       |       | V      | K      | V      | C      | F     | L      | QEA    | TQ        | SKI     | DT          | GL   | F       | ----- | 1284  |      |
| 1.9       | LM       | SA    | VA    | K        | A      | D       |       | V      | K      | V      | C      | F     | L      | QEA    | TQ        | SKI     | DT          | GL   | F       | ----- | 1284  |      |
| 1.10      | LM       | SA    | VA    | K        | A      | D       |       | V      | K      | V      | FVLLF  |       |        |        |           |         |             |      |         | ----- | 1253  |      |
| 1.11      | LM       | SA    | VA    | K        | A      | FD      |       | V      | K      | V      | C      | F     | L      | QEA    | TQ        | SKI     | DT          | GM   | F       | ----- | 1285  |      |
| 2.1       | V        |       |       |          |        |         |       |        |        |        |        |       |        |        |           |         |             |      |         | ----- | 1233  |      |
| 2.2       | V        |       |       |          |        |         |       | I      |        | L      |        |       |        |        |           |         |             |      |         |       | ----- | 1287 |
| 2.3       | V        |       |       |          |        |         |       | L      |        |        |        |       |        |        |           |         |             |      |         |       | ----- | 1283 |
| 2.5       | V        |       |       |          |        |         |       |        |        |        |        |       |        |        |           |         |             |      |         |       | ----- | 1233 |
| 2.7       | V        |       |       |          |        |         |       | I      |        | L      |        |       |        |        |           |         |             |      |         |       | ----- | 1287 |
| 2.8       | V        |       |       |          |        |         |       | I      |        | L      |        |       |        |        |           |         |             |      |         |       | ----- | 1287 |
| 2.10      | V        |       |       |          |        |         |       | K      |        |        |        |       |        |        |           |         |             |      |         |       | ----- | 1287 |
| 2.11      | V        |       |       |          |        |         |       | L      |        |        |        |       |        |        |           |         |             |      |         |       | ----- | 1287 |
| S2.1      | V        |       |       |          |        |         |       | L      |        |        |        |       |        |        |           |         |             |      |         |       | ----- | 1287 |
| S2.2      | V        |       |       |          |        |         |       | L      |        |        |        |       |        |        |           |         |             |      |         |       | ----- | 1287 |
| 3.1       | LM       | NAM   | I     | K        | M      | MD      | GI    |        | V      | K      | V      | H     | N      | NI     | SELHKILT  | KACQ    | FKEM        | N    | L       | HF    | ----- | 1279 |
| 3.3       | LM       | NAM   | I     | K        | M      | MD      | GI    |        | V      | K      | V      | H     | N      | NI     | SELHKILT  | KACQ    | FKEM        | N    | L       | HF    | ----- | 1279 |
| 3.4       | LM       | NAM   | I     | K        | M      | MD      | GI    |        | V      | K      | I      | H     | N      | NI     | SELHKILT  | KACQ    | FKEM        | N    | L       | HF    | ----- | 1279 |
| 4.5       | TVARNV   | N     | IV    | KNGK     | S      | CKL     | Q     | SELLNT | F      | CNMN   | KI     | DV    | FEKDFL | SG     | TYVQMTLY  | NVNVLL  | PECNCF      |      |         |       | ----- | 1273 |
| 4.10      | TVARNV   | N     | IV    | KNGK     | S      | CKL     | Q     | SELLNT | F      | CNMN   | KI     | DV    | FEKDFL | NG     | TYVQMALYN | VNVLL   | PECNCF      |      |         |       | ----- | 1273 |
| 4.11      | TVARNV   | N     | IV    | NNGK     | S      | CKL     | Q     | SELLNT | F      | CNMN   | KI     | DV    | FEKDFL | NG     | TYVQMALYN | VNVLL   | PECNCF      |      |         |       | ----- | 1273 |
| 4.14      | TVARNV   | N     | IV    | KNGK     | S      | CKL     | Q     | SELLNT | F      | CNMN   | KI     | DV    | FEKDFL | NG     | TYVQMALYN | VNVLL   | PECNCF      |      |         |       | ----- | 1273 |
| 5.3       | V        |       |       |          |        |         |       |        |        |        |        |       |        |        |           |         |             |      |         |       | ----- | 1286 |
| 5.4       | V        |       |       |          |        |         |       |        |        |        |        |       |        |        |           |         |             |      |         |       | ----- | 1242 |
| 5.6       | V        |       |       |          |        |         |       |        |        |        |        |       |        |        |           |         |             |      |         |       | ----- | 1286 |
| 5.7       | V        |       |       |          |        |         |       |        |        |        |        |       |        |        |           |         |             |      |         |       | ----- | 1286 |
| 5.8       | V        |       |       |          |        |         |       |        |        |        |        |       |        |        |           |         |             |      |         |       | ----- | 1286 |
| 6.1       | SVARTV   |       | IV    | NKNAK    | IEL    | KMY     | K     | L      | N      | KTVEQ  | RM     | EKETE | KT     | MLNTPY | IMYT      | DGL     | IDLPE       |      |         |       | ----- | 1282 |
| 6.2       | SIARTV   |       | IV    | NKNAK    | IEL    | KMY     | K     | L      | N      | KTVEQ  | RM     | EKETE | KT     | MLNTPY | IMYT      | DGL     | IDLPERLCLMF | S    | CFNTN   | IMS   | ----- | 1297 |
| 6.4       | SVARTV   |       | IV    | NKNAK    | IEL    | KMY     | KNWKT | I      | LKLWNN | I      | LEWKKR | LN    | TKRLC  |        |           |         |             |      |         |       | ----- | 1263 |
| 6.5       | SVARTV   |       | IV    | NKNAK    | IEL    | KMY     | K     | L      | N      | KTVEQ  | RM     | EKETE | KT     | MLNTPY | IMYT      | DGL     | IDLPE       |      |         |       | ----- | 1282 |
| 6.6       | SVARTV   |       | IV    | NKNAK    | IEL    | KMY     | K     | L      | N      | KTVEQC | RM     | EKETE | KT     | MLNTPY | IMYT      | DGL     | IDLPE       |      |         |       | ----- | 1282 |
| 6.7       | SVARTV   |       | IV    | NKNAK    | IEL    | KMY     | K     | L      | N      | KTVEQC | RM     | EKETE | KT     | MLNTPY | IMYT      | DGL     | IDLPE       |      |         |       | ----- | 1282 |
| 7.5       | FFLSHARY | -     | A     | IW       | RRNMAY | F       | EAKI  | IDVNV  | FKSVVR | KNV    | LMWKY  | LRKDV | FEEAF  | I      | HE        | E       | ITV         | DH   | KGLMLNF |       | ----- | 1277 |
